# Supplementary material for: A mouse systems genetics approach reveals common and uncommon genetic modifiers of hepatic lysosomal enzyme activities and glycosphingolipids
Source: Research Square preprint supplement (doi:10.21203/rs.3.rs-2362074/v1), 2022-12-28
Supplement: Supplementary file 1 [file 263e8e1543833ae554e84083.xlsx]

## Sheet: Hoja 4
Tiam2	Tfb1m	Dok5	Tmem135	Fam181b	Tenm4	Plk2	Stk32a	Dpysl3	Prex1	Fstl5	Vps45	Hist2h2be	Pde4dip	Tusc1	Fzd10	Grid2	Zc3h12c	Arhgap18	Cdh6	Fam91a1	A1bg	Pvt1	Adamts5	Csnk1g3	Chchd6	Zfat	4933412e24Rik
SIN3A	KLF6	EP300	EGR1	SCRT2	NANOG	HMBOX1	HMBOX1	SCRT2	POLR2A	JUND	PRDM1	HCFC1	U2AF2	POU5F1	KDM1A	NANOG	CBFA2T3	CBFA2T3	JUND	RARA	SP1	POLR2A	CTCF	ZNF121	BHLHE40	TCF12
YY1	SP1	ETV6	SOX13	PKNOX1	BCL6B	CEBPB	CEBPB	POLR2A	PPP1R10	NANOG	PRDM6	KLF6	ZNF512	NANOG	EZH2	CTCF	ZIC2	MZF1	ATF2	PPP1R10	POLR2A	CEBPB	CEBPB	CREB1	CTCF	CEBPB
REST	POLR2A	CSDE1	ZNF316	HNF4A	TCF7	JUND	JUND	JUND	MYC	POLR2A	SOX5	SP1	PRDM1	JUND	CEBPB	ZNF654	EP300	ZNF316	MTA2	ZBTB33	ZIC2	MTA2	EP300	FEZF1	REST	NANOG
POU5F1	ZNF580	MNT	MAFG	MAX	GATA2	POLR2A	POLR2A	CEBPB	MAX	USF1	SOX13	POLR2A	ZNF384	MAFK	TCF7L2	RAD21	NFE2	MYNN	EP300	TEAD4	ZNF600	ZIC2	ATF2	ZSCAN4	BCL6	BHLHE40
TBP	ATF2	MBD2	MAFK	SP1	PKNOX1	EP300	EP300	BHLHE40	DDX20	YY1	JUND	ZNF580	CREB1	CEBPB	POU5F1	SMC3	ATF1	CEBPB	NFE2L2	POLR2A	CEBPG	ZNF362	JUND	POLR2A	ZNF384	POLR2A
JUND	DPF2	TEAD3	EMSY	NR2F2	EP300	MAX	MAX	FOS	SIN3A	TRIM28	EP300	ATF2	ZNF740	MAX	FOS	POLR2A	ATF2	EP300	POLR2A	RUNX3	CEBPA	NR2C1	RAD21	BCL11A	SPI1	REST
BCL11A	NCOR1	ZNF217	CEBPB	JUNB	FOS	MAFK	MAFK	NFE2	ZNF217	EP300	STAT3	KLF17	CTCF	EP300	BACH1	IKZF1	RAD51	JUND	CEBPB	SIN3A	NFIC	ZBTB33	SP1	EBF1	CHD2	FOS
CEBPB	ATF3	ZFX	FOS	PRDM1	ZIC2	FOXA1	FOXA1	GATA2	GATA2	SP1	MAFF	NCOR1	SPI1	EBF1	FOXA1	RELB	USF1	MAFF	MAFF	YY1	ZNF207	CREB1	POU5F1	FOXA1	ZNF592	ATF2
TRIM22	ZNF600	TEAD1	HLF	YY1	GLIS1	CEBPG	CEBPG	CHD2	ZBTB33	POU5F1	POLR2A	ZNF184	MCM7	MTA2	HNF4A	YY1	ZNF687	MAFK	MAFK	POU5F1	MNT	ZNF592	MAFF	ARNT	EBF1	ATF7
EP300	RCOR1	MAFF	POLR2A	MAFF	SP1	DACH1	DACH1	EP300	SMARCA5	MAFF	YY1	CTCF	ZNF664	ZNF217	TRIM28	JUND	NR2F2	REST	SOX5	TBP	TBP	ZSCAN4	TRIM28	MAFF	IKZF1	MYNN
IRF4	ZNF10	MAFK	TCF12	MAFK	ZNF24	STAT3	STAT3	SIN3A	MTA2	MAFK	NFE2	ZIC2	FOXA1	CTBP1	RFX1	CEBPB	CTCF	POLR2A	SOX13	HMBOX1	ZEB1	MNT	PKNOX1	ZNF316	GLIS1	MEIS2
SMARCA5	DNMT3B	CREB1	NANOG	SPI1	CTCF	RAD21	RAD21	PKNOX1	GLIS1	CEBPB	CEBPA	ZNF600	ZNF350	FOXA1	SP1	EP300	REST	NR2F2	ZNF146	MAFF	BHLHE40	ATF2	NFE2L2	MAFK	EGR2	JUND
FOSL2	CEBPG	GATA3	FOXP1	EZH2	RAD21	NR2F2	NR2F2	SPI1	CHD2	TCF7L2	TFAP4	ZNF10	TEAD2	SMARCE1	DEK	STAT3	ZNF654	SP1	MNT	ZNF316	ZNF610	ATF7	EZH2	MAFG	IKZF2	ZBTB40
NFE2	YY1	RBM22	GABPA	HMBOX1	BHLHE40	FOS	FOS	NR2F2	CTCF	BHLHE40	CEBPG	KLF9	ZNF544	DPF2	EP300	MAFK	RAD21	ATF4	SP1	USF2	KLF9	ZNF384	FOXA2	ZNF10	EED	GATA2
SPI1	REST	ZNF274	NFIC	ZBTB48	MNT	POU5F1	POU5F1	ZNF585B	ESRRA	BCL11A	CEBPB	CEBPG	ZNF501	CTCF	RAD21	NFE2L2	SMC3	SPI1	FOS	NFE2	NONO	ZNF26	RXRA	PRDM6	RUNX3	PKNOX1
BATF	CEBPA	NFIC	NFIB	MEIS2	JUND	NFE2L2	NFE2L2	CEBPG	PKNOX1	BATF	ESRRA	YY1	NFXL1	RAD21	STAT3	FOS	JUND	TEAD4	SPI1	MAFK	SP2	BCOR	HNF4A	CHD2	CEBPG	CTCF
ELF1	NFIC	NFIB	LCORL	MNT	SPI1	BACH1	BACH1	NFIC	SCRT1	NR2F1	ATF2	REST	SIN3A	SMC3	TBP	TAF1	ZNF507	ZNF24	POU5F1	JUND	SAFB	NFXL1	SPI1	GATA2	ZNF623	RAD21
PAX5	ZNF207	LCORL	NFIA	CTCF	EGR2	ATF2	ATF2	NFIB	SCRT2	IKZF1	JUNB	HIC1	TAL1	NFIB	MAX	POU5F1	ZNF143	MTA3	NANOG	MAFG	EBF1	GLIS1	MNT	JUND	CEBPB	ZNF143
POLR2A	BRCA1	SP1	POU5F1	REST	NFE2L2	ATF7	ATF7	MAFK	CREB1	PKNOX1	NFXL1	ZBTB10	MAFG	ZNF143	PKNOX1	TBP	ZNF133	CBX3	PRDM1	BHLHE40	SIN3A	ZNF687	REST	EP300	ATF1	KDM1A
IKZF1	CEBPB	ZHX2	YY1	ZNF207	PRDM10	MBD2	MBD2	PRDM4	YBX1	FOS	SPI1	CEBPA	ZNF362	TRIM22	ESRRA	SIN3A	FOS	TRIM28	BHLHE40	ZMYM3	CBX1	RFX1	ZNF654	EMSY	ZNF24	ATF3
NFATC1	MAZ	REST	SP1	ZNF654	CEBPB	CUX1	CUX1	PRDM10	NFXL1	MTA2	PAX8	NFIC	IKZF1	SP1	SCRT1	SP1	MAFK	HMBOX1	RAD21	ZNF548	SUPT5H	MYC	CUX1	SPI1	MYC	CEBPG
ATF2	MBD2	TCF12	JUND	TCF12	STAT3	GATA2	GATA2	REST	MBD2	IKZF2	ZNF121	DEK	ATF4	POLR2A	USF1	USF1	MAFG	CBX5	EZH2	ZNF507	MAX	KDM1A	RFX5	SCRT1	SOX5	ATF4
JUNB	CTCF	JUND	CTCF	RAD21	EZH2	RFX5	RFX5	TAF1	ZNF623	CEBPA	ZNF600	ZNF207	BACH1	GLIS1	SCRT2	TCF12	HNF4A	RBM22	ZNF140	ZNF24	KLF16	EZH2	SMC3	PRDM1	NR2F6	CEBPA
BACH1	CHD2	ATF2	ZNF654	RFX5	USF2	GATA3	GATA3	ATF4	HSF1	FOXA1	ZNF585B	RCOR1	ARID3A	EGR2	MBD2	CHD2	ZBTB40	BHLHE40	ATF7	KDM1A	MYC	MTA1	ZBTB40	SCRT2	ZNF652	FOXA2
ARID3A	NONO	SP7	EP300	SMC3	USF1	ZNF217	ZNF217	ZNF143	ZNF207	KDM6A	INSM2	CEBPB	MTA2	ZNF335	ELF1	FOXA2	CEBPB	FOS	CTCF	BCOR	ELF1	ATF4	ZNF384	ZNF189	ZNF7	RXRA
PKNOX1	TRIM22	JUN	RAD21	ZNF2	CREB1	RFX1	RFX1	MAX	NFIB	RAD51	ZNF664	MAZ	IKZF2	ZBTB44	CTBP1	BCL6	EMSY	RFX1	NFE2	EP300	ZNF24	TRIM24	ZNF664	ZNF362	POLR2A	FOXP1
JUN	ELK1	ATF7	RFX5	ZNF143	RFX1	GATAD2B	GATAD2B	MAFF	CHD1	SAP130	ZNF362	MBD2	ATF7	YY1	ZNF217	FOXP1	PRDM10	NFIL3	MAFG	EMSY	SMARCA4	TARDBP	ZNF362	ZNF18	SOX13	HNF4A
NKRF	HES1	CEBPB	SMC3	ZNF660	ATF2	RXRA	RXRA	YY1	PAX8	FOXA2	HDAC2	ZNF592	NFE2	CHD2	SMARCE1	SOX5	BHLHE40	HLF	RXRA	HES1	ZNF2	NRF1	ZNF652	CEBPB	NR2F1	GATAD2A
CREB1	MNT	STAT3	STAT3	TRIM22	ATF7	TCF7L2	TCF7L2	NFE2L2	EGR2	HOMEZ	ZMYM3	NONO	MEIS2	ZNF654	DPF2	HNF4A	KDM1A	BMI1	HNF4A	CTBP1	NRF1	COPS2	SP7	FOS	RAD21	SP1
TARDBP	CHD1	HLF	ATF1	CHD2	TCF12	MEIS2	MEIS2	CREB1	RCOR1	CTBP1	HNF4A	TRIM22	CEBPB	MAFF	CREB1	RXRB	CEBPA	ZIC2	HNF4G	PKNOX1	IKZF1	CBFA2T3	DACH1	ZNF24	ZNF579	ZNF10
FOS	ZMYM3	NFE2L2	ATF4	CEBPA	TAL1	SP1	SP1	BACH1	DPF2	THAP11	ZNF324	MNT	PKNOX1	REST	MNT	NR2F6	ZNF610	SP7	ZNF592	HNF1A	HDGF	FOXK2	EGR2	ZSCAN21	ZNF444	HLF
RAD51	SIN3A	POLR2A	ZBTB40	FOXA2	CBFA2T3	SCRT1	SCRT1	CTCF	ZMYM3	SMAD4	KDM1A	CHD1	CEBPG	TCF7L2	ZNF579	NFIA	FEZF1	SCRT2	MAX	FOS	TAF1	HES1	ZNF512	OSR2	JUND	ESRRA
ZNF687	ZNF341	FOS	MEIS2	RARA	ZFHX2	ZNF366	ZNF366	SMC3	ZFP36	FOSL2	ZBTB17	IRF3	THRAP3	FOS	SMARCA5	PPARG	BCL6	BCL11A	ZFP69B	MCM5	ZNF362	ZNF512B	PRDM1	MZF1	ZIC2	SPI1
CREM	TBP	FOXA2	PKNOX1	FOSL2	MAFK	TARDBP	TARDBP	RAD21	BCOR	RARA	ZNF24	SIN3A	MNT	BRCA1	ZNF444	MIXL1	ZNF843	IRF4	ZNF366	CTCF	BACH1	SMAD4	ZBTB44	WT1	ZBTB33	STAT5A
MTA2	ARNT	TCF7L2	ATF7	TEAD3	POLR2A	TSC22D4	TSC22D4	SP1	ZNF444	DMAP1	BCOR	ZNF341	NFRKB	STAT3	CTCF	SOX13	PRDM6	BATF	ATF3	ZFP91	GLIS1	RARA	POLR2A	SP7	ZFP36	FOXA1
IKZF2	SSRP1	FOSL2	TAL1	FOXP1	POU5F1	GFI1B	GFI1B	POU5F1	RXRA	CREM	BCL11A	ARNT	BRCA1	TBP	REST	FOXA3	TRIM28	NFATC1	ZNF692	THRB	ZBTB40	FOSL2	ZIC2	RAD21	SREBF1	MYC
EED	ZNF639	ZNF143	NFE2	RXRB	BACH1	ZSCAN5C	ZSCAN5C	NANOG	EBF1	YBX1	NFATC1	ZNF217	ZZZ3	NFE2L2	ZNF654	ZGPAT	HLF	ATF2	SCRT2	RAD21	ZNF398	FOS	CEBPG	ZBTB20	FOS	RUNX3
DPF2	MAX	CTCF	ZFP91	ELF3	PRDM1	SCRT2	SCRT2	RFX1	HNF4A	FOXP1	ZBED1	ZNF639	MAFK	ZKSCAN1	SMC3	TRIM28	ZBTB12	JUNB	MGA	SPI1	ZNF18	SKI	TCF12	STAT3	NFE2L2	ARNT
RUNX3	KMT2B	RAD21	ZNF384	NFIA	CUX1	RAD51	RAD51	ZNF654	REST	ZBTB40	IKZF1	MAX	JUND	ZHX1	MAZ	ZNF384	GATAD2A	ZBED1	SCRT1	NR2F6	HNF4A	DPF2	MAX	REST	EP300	MLLT1
NBN	MXD4	NR2F6	TEAD4	ZNF644	RXRA	MAFF	MAFF	TRIM22	SP1	SOX5	MNT	ZEB1	POLR2A	ZIC2	ZNF143	CTBP1	MZF1	CREM	ATF4	REST	MEIS2	RFX5	TBP	ATF4	NFIC	IRF4
ETV6	SMAD5	PKNOX1	CBFA2T2	ZNF384	HNF4A	ZNF316	ZNF316	ZNF335	BHLHE40	HMG20A	CREM	JUND	KHSRP	ZNF600	CREM	PKNOX1	DPF2	MTA2	USF1	SMC3	ZFX	SUZ12	YY1	EZH2	ZNF217	IKZF1
RELB	HCFC1	XRCC5	ZNF24	ZNF24	RFX5	BHLHE40	BHLHE40	ATF2	GATAD2B	GATAD1	EED	KLF7	EP300	HIC1	MCM2	LEF1	ARID1B	EED	CEBPA	SMARCA5	KLF1	JUND	MYC	YY1	CTBP1	IKZF2
GATAD2B	KDM6A	NFXL1	CBFA2T3	NCOR1	IKZF1	MAFG	MAFG	JUN	MNT	HDAC2	IKZF2	KMT2B	ZSCAN16	ELK1	XRCC5	ARNT	SMARCE1	RUNX3	CHD4	TRIM22	SP7	CTCF	TAF1	EGR1	PKNOX1	DPF2
BCLAF1	CHD4	MYC	MTA2	SKI	ZNF398	REST	REST	EGR2	ETV6	MIER2	RUNX3	SMAD5	PRDM6	ELF1	TRIM22	WT1	ATF3	ETV6	FOXA2	CEBPB	L3MBTL2	BATF	ZHX1	SP1	ATF4	NBN
ZNF316	RAD51	NFIL3	ARID1B	NR3C1	ZNF644	CBFA2T2	CBFA2T2	ATF7	ZFHX2	LCORL	ETV6	HES1	ZNF133	RXRA	FOSL2	BACH1	HMBOX1	ARNT	HOMEZ	NR2F2	HDAC1	JUNB	ZNF398	POU5F1	NFIB	RELB
RBM22	ELF1	ZNF654	REST	RB1	CHD2	TOE1	TOE1	ZFHX2	ZNF384	HNF4A	ZNF184	ELF1	CBX8	GABPA	EGR2	EZH2	SMARCA4	WT1	FOSL2	NR2F1	NKRF	RAD21	EGR1	NANOG	USF1	YY1
GATA2	ZNF623	BCLAF1	TRIM22	ZNF362	ARNT	USF1	USF1	RAD51	ZFX	RXRB	ZNF132	ZNF623	SKIL	ZBTB40	ZFHX2	ATF3	NFIC	ZNF664	FOXP1	DPF2	CEBPB	EP300	GATA2	CTCF	HCFC1	FOSL2
ZNF660	KLF11	NRF1	PRDM1	ARID3A	CEBPG	EMSY	EMSY	TOE1	RFX1	NR2F6	ZNF547	KLF11	MYNN	MAZ	RAD51	DNMT3B	FOSL2	ATF7	ARID3A	ZBTB48	KLF10	ZNF664	ZNF202	HOMEZ	ZNF654	NFE2
MAFK	TAF9B	ZNF48	MAFF	HLF	FOXA2	PKNOX1	PKNOX1	CBFA2T3	TRIM22	ELF3	ZNF560	TAF9B	ZNF571	HNF4A	L3MBTL2	CEBPA	KAT2B	NFIC	NFIL3	BATF	NCOA6	EGR2	ZNF692	CHAMP1	TRIM22	NFIA
KDM1A	BHLHE40	SMC3	ELF1	ZXDB	SIN3A	BATF	BATF	ZEB1	HES1	ARID3A	ZNF404	SAP130	ZNF318	FOXM1	USF2	FOXA1	SP1	ZNF585B	HLF	EGR1	ZSCAN21	IKZF1	USF2	TRIM22	MAX	NFE2L2
RFX5	SAP130	U2AF2	RB1	PRDM10	TBP	TCF12	TCF12	SP7	RFX5	ATM	ZNF512	ZNF610	SMARCA4	TAF1	MGA	ZNF217	POLR2A	NUFIP1	GATAD2A	ZNF518A	SP3	ZFHX2	PRDM10	IRF4	MXD4	HNF4G
CHD2	KLF9	TRIM22	HNF4A	CC2D1A	KDM1A	RARA	RARA	ZNF366	GTF2F1	JUN	ZSCAN5C	FOXA2	ARID1B	ZNF768	ZNF384	SAP130	SPI1	ZBTB33	TCF7	L3MBTL2	ZBTB8A	NCOR1	ZBTB17	ZBTB48	SIN3A	SOX5
CBFA2T3	ZNF610	USF1	ELF3	ZNF444	ZFP36	FOSL2	FOSL2	SP3	RUNX3	SOX6	ZNF316	CUX1	SMARCE1	ZFX	ZNF362	CUX1	CEBPG	ZMYM3	FOXA3	ARID1B	ATF1	HDAC2	USF1	BATF	SMC3	SOX13
CTCF	FOXA2	YY1	CEBPA	CEBPB	HCFC1	ARID1B	ARID1B	ZXDB	ZBTB1	NFIL3	ARHGAP35	FEZF1	RNF2	ZNF561	SREBF1	HOMEZ	ZNF316	USF1	CBFA2T3	SMARCE1	CREB1	TCF12	KDM1A	IKZF1	MBD1	NR2F2
ZNF654	FEZF1	CEBPA	ZMYM3	EP300	ZNF143	SMC3	SMC3	ZNF629	FOS	HNF1A	MEIS2	HOMEZ	SOX6	EGR1	TAF1	MAFF	YY1	PRDM1	ZNF316	ATF3	ZNF692	NR2F1	ZBTB26	JUNB	NRF1	HES1
RAD21	HOMEZ	CHD4	CHD4	PRDM6	PAX8	TBP	TBP	ZNF10	SIX4	ZNF644	MAFK	CTBP1	HMBOX1	L3MBTL2	POLR2A	THAP11	ATF4	JUN	YY1	IKZF1	RNF2	CUX1	SCRT2	CREM	ZNF2	MAX
SMC3	ZNF511	RXRA	SAP130	JUND	NFATC1	EZH2	EZH2	HIC1	NBN	PPARG	PKNOX1	RAD21	ZNF184	MNT	MAFF	RXRA	TRIM24	CREB1	ZSCAN5A	SMARCA4	YY1	EBF1	ZNF335	IKZF2	RB1	MAFF
BHLHE40	SP2	ZBTB33	FOXA2	ZMYM3	ZSCAN4	ELF1	ELF1	TCF12	ZIC2	MLX	TSHZ1	ZNF511	ZNF513	SP3	RFX5	FOSL2	MEF2D	KLF6	ZNF530	MGA	TRIM24	KAT2B	ZNF600	EED	ZNF48	ZNF316
RBPJ	ZFP64	HNF4A	HOMEZ	KDM1A	ZNF217	NCOA3	NCOA3	FEZF1	ELF1	SOX13	FOS	SP2	ZBTB48	ZBTB8A	ZFP36	RARA	ZNF592	CTCF	ZNF547	WT1	LARP7	ZNF207	ZNF10	DPF2	BACH1	MAFK
ZNF48	MAFF	HNRNPH1	THAP11	BCOR	MBD2	ZNF687	ZNF687	ZNF843	TRIM28	MIXL1	RUNX1	ZFP64	ZNF189	ZNF660	BRCA1	TEAD3	CBFB	ZNF654	CBLL2	FOXA1	CTBP1	RUNX3	ZBTB10	RUNX3	ZNF143	MAFG
ZNF143	MIER3	FOXA1	SMAD4	DEK	CTBP1	CTCF	CTCF	PRDM6	ZNF24	GATAD2A	TAL1	RFX5	ZBTB21	ZEB2	ZHX1	CREM	NCOA1	TRIM22	ZNF514	RAD51	GLIS2	CTBP1	NFIC	ETV6	L3MBTL2	MNT
USF1	TARDBP	MAX	NBN	ZNF217	GATA3	ZNF654	ZNF654	ZNF24	ZNF664	CREB1	TCF12	MIER3	ZNF398	ZFP36	NFE2L2	KDM1A	IKZF1	CUX1	AEBP2	RFX5	ZBTB17	ZNF8	ZNF207	RELB	TGIF2	EMSY
ZNF121	NFATC3	GABPA	KAT7	RAD51	TCF7L2	SIN3A	SIN3A	ZNF189	ZNF579	FOXK2	NR2F6	IRF4	KLF1	GLIS2	RXRA	TBX3	ZBTB21	RAD21	ZNF837	GABPB1	ZNF143	ZMYM3	ZNF592	ZNF592	XRCC5	EBF1
MLLT1	NKRF	PRDM10	RARA	RXRA	FOXA1	CREB1	CREB1	ZNF664	CUX1	TCF7	TEAD4	TARDBP	TRIM28	NRF1	ETV4	SMARCE1	ZNF217	SMC3	ZNF16	ATF1	ZNF579	HLF	MAZ	ZNF654	YY1	ZBED1
ERF	GABPA	EGR1	DRAP1	USF2	NCOA3	PRDM10	PRDM10	ZNF362	CEBPB	ZNF24	DPF2	ZBTB7B	BCL6B	ELF4	GATA3	HMG20A	CREM	THAP11	ZNF791	SREBF1	PKNOX1	HDGF	ZNF341	RFX5	LARP7	ZNF687
SAP130	THAP11	ATF3	DMAP1	ZBTB40	ZHX2	TRIM22	TRIM22	ZNF518A	HDGF	USF2	HDAC1	ZNF513	ZBTB17	ARNT	FOXP1	DPF2	PKNOX1	HNF4A	EGR2	FOXK2	ZNF501	ZBTB6	ZNF639	SMC3	USF2	CREM
ATF3	SMARCA5	BCL11A	TEAD3	MYC	ESRRA	ZNF335	ZNF335	GLIS1	ZNF512B	MNT	ARID1B	NFATC3	ZNF768	KLF8	SOX5	ZNF792	ZNF561	ZNF592	RBAK	HCFC1	DPF2	EMSY	SAP130	RB1	GLIS2	EED
EGR2	ZSCAN9	BRCA1	BCL6	TOE1	CBFB	ZIC2	ZIC2	ZNF398	SUZ12	ATF7	SMARCE1	TRIM25	ZSCAN26	NR2F2	HHEX	MIER2	CREB1	KDM6A	ZNF687	ZNF654	MTA3	BCL11A	FEZF1	ZNF143	SMARCA5	SCRT2
ZFHX2	SIN3B	DEK	CREM	NR2F6	ZFP91	FEZF1	FEZF1	ZNF561	CTBP1	FOXA3	TBL1XR1	SMC3	ZNF776	ZNF423	TFAP4	ELF3	ARID3A	SAP130	ZNF354B	FOXA2	ATF7	YY1	SP2	ZNF660	ZFHX2	BCL11A
FOXA2	ZNF316	RFX5	KDM1A	ZFP69B	NR2F1	PRDM6	PRDM6	ZBTB12	SMARCE1	TFE3	KLF16	NKRF	ZNF112	ZFHX2	SOX13	NCOA3	TARDBP	ZSCAN9	ZNF266	CUX1	NBN	FOXA2	SIN3A	ZEB2	ZBTB26	EP300
CEBPA	RXRA	TBP	SOX5	GATAD2A	IKZF2	ZNF2	ZNF2	ZSCAN21	RAD51	ZGPAT	CTBP1	THAP11	ZNF174	ZBTB26	TCF7	ARID3A	ZNF629	RARA	ZNF239	STAT3	KLF8	RXRA	ZNF513	TEAD1	RNF2	SMARCA5
HNF4A	EBF1	NFE2	ZBTB33	XRCC5	RUNX3	PRDM4	PRDM4	ZSCAN4	FOXA1	SKI	SOX6	SMARCA5	ZNF223	ZNF444	RERE	CEBPG	MTA2	BCL6	ZNF707	MAZ	ZBTB20	PKNOX1	SMARCA5	SMARCE1	MGA	ZBTB33
CEBPG	NBN	SPI1	HMG20A	ZNF692	MLLT1	ZNF221	ZNF221	ZNF660	ZBTB17	TEAD1	MEF2D	ZSCAN9	GLIS1	SREBF2		JUN	IKZF2	FOXP1	GTF2A2	SCRT1	GATAD2B	FOXA1	ZSCAN9	ZNF652	TCF12	TAF1
HLF	SMAD4	BMI1	HMG20B	CBFA2T2	MAFF	OSR2	OSR2	ZNF692	ATF7	GATAD2B	HMBOX1	STAT3	ZNF561			NFIL3	ATF7	MAFG	ZNF302	HNF4A	ZNF777	HNF4A	EBF1	NFE2L2	SP1	BATF
ZNF384	SKIL	NR2F1	RBPJ	KAT8	ZNF384	SOX6	SOX6	OSR2	ZNF600	ZNF282	CBFA2T3	SIN3B	ATF2			CREB1	RUNX3	RBPJ	HMBOX1	NFIB	ZNF121	BHLHE40	SMAD4	ZNF624	GATA2	NFATC1
SP1	CBFB	BHLHE40	ZNF48	ESRRA	ZNF146	PRDM1	PRDM1	MZF1	ZBTB40	TRIM22	SMARCA4	MLLT1	ZNF10			ZNF644	MLLT1	RXRB	ZFHX2	SP1	RBFOX2	REST	KAT7	NFIB	ZNF184	JUNB
ZNF580	ZBTB33	IKZF1	RXRB	USF1	BATF	ZBTB44	ZBTB44	GFI1B	EP300	REST	WT1	ZNF316	NR2C1			HLF	BCL11A	L3MBTL2	ZNF274	KLF16	AFF1	SP1	DRAP1	ZNF266	ZSCAN4	NR2F6
KLF17	KAT7	TARDBP	NR2F6	TFE3	ZNF8	MGA	MGA	ZBTB17	HCFC1	IRF4	REST	RXRA	SUPT5H			GATAD2B	BATF	GATAD2A	EMSY	ESRRA	ZNF423	MAFK	DMAP1	BHLHE40	CBFA2T2	ETV6
ZNF184	USF2	MTA2	CEBPG	NR2F1	ZSCAN5C	BRCA1	BRCA1	TSHZ1	ETS1	EBF1	CTCF	TBP	NR2F1			NCOR1	JUNB	NFKBIZ	ZIC2	TARDBP	TARDBP	EGR1	ASH2L	NR2F2	RXRA	BCLAF1
ZIC2	RARA	IKZF2	KDM3A	DPF2	SCRT2	CTBP1	CTBP1	ZBTB20	NRF1	CBFB	ZNF223	DDX20	TCF12			GATAD2A	ZMYM3	CBFA2T2	EBF1	ZNF444	ZBTB26	SIN3A	ZSCAN5A	FOSL2	ZKSCAN1	NFIC
ZNF600	ETV4	DPF2	ARID4B	KLF17	SMC3	USF2	USF2	USF1	ZNF143	SPI1	RAD21	NBN	ESRRA			REST	CBX3	SOX13	TAL1	SCRT2	SCRT2	TCF7L2	CREM	EGR2	NR2F2	GLIS1
ZNF341	FOSL2	MAZ	NFIL3	ZNF592	ATF3	DPF2	DPF2	PRDM1	SIX5	ELF1	GLIS1	SMAD4	NBN			SMARCC2	BCOR	MLLT1	MYC	ELK1	ZNF335	ZBTB40	ZNF843	ZFHX2	CBFA2T3	ZFP69B
ZNF639	RBM22	IRF4	MIXL1	TBP	YY1	ZKSCAN1	ZKSCAN1	ZBTB44	ZKSCAN1	STAT5A	GABPB1	SKIL	ZNF654			KAT8	DEK	EMSY	BATF	ELF1	MGA	ZNF24	ZNF205	TCF7L2	STAT3	CREB1
ZEB1	DRAP1	EBF1	NCOR1	CTBP1	HOMEZ	NCOR1	NCOR1	WT1	NFIC	PAX5	SMC3	CBFB	TRIM22			HNF4G	TRIM22	SMARCA4	PAX5	E4F1	HCFC1	SPI1	FOXP1	ZNF843	TBP	ATF1
FEZF1	DMAP1	BATF	GATAD2A	ZNF316	ZBTB33	NFIC	NFIC	EGR1	ZNF687	NFATC1	XRCC5	ZBTB33	ZNF217			ETS1	RFX5	MYC	TCF12	SOX5	ZNF580	GATA2	ZBTB48	FOXK2	TAL1	ZNF629
MAFF	ZFP91	ELF1	TGIF2	NBN	ETV4	TAL1	TAL1	TBP	ARID3A	BMI1	MZF1	ZBTB5	ZNF24			RCOR2	ZFP91	MGA	IKZF1	ZNF143	SIX5	NFRKB	KLF16	PRDM4	SMARCE1	CHD2
ZNF843	ASH2L	PAX5	TCF7	TAL1	RARA	SMARCA4	SMARCA4	RXRA	KLF6	MTA3	PRDM10	TCF7L2	RAD21			RERE	NFIA	ZNF639	ZNF24	ARID4B	NCOR1	E2F8	PRDM6	CTBP1	DPF2	OSR2
PRDM6	TEAD3	ZNF24	KAT8	NFE2	REST	ZEB2	ZEB2	HNF4A	HOMEZ	ATF2	GLIS2	NR3C1	PATZ1			TEAD1	ARID2	ZEB1	NR2F1	ZFP3	CTCF	ZNF217	BHLHE40	PKNOX1	TOE1	ZBTB20
ZSCAN23	JUND	TBL1XR1	IRF2	ZFP91	MAX	IKZF1	IKZF1	HNF4G	THAP11	JUNB	ZFHX2	KAT7	ZSCAN29			ERF	KLF16	ZNF189	ARID1B	CREB1	DNMT3B	ZNF143	ZNF189	LEF1	TEAD4	HMBOX1
ZNF24	THRB	RUNX3	ZKSCAN8	ATF1	ELF3	SMARCE1	SMARCE1	EZH2	ZNF205	BACH1	MTA2	ETV4	ZNF444			ZNF341	GATAD2B	INSM2	SMARCE1	MIXL1	BRCA1	SIX4	SOX5	ZNF221	KLF1	WT1
MYC	ZSCAN5A	NBN	FOXA3	HDAC2	EGR1	ATF3	ATF3	BCL11A	ZBTB48	ZNF217	MYC	NFE2	ZBTB44			ZNF189	CC2D1A	ZNF362	CBFA2T2	XRCC5	REST	EP400	ZNF2	ZNF423	NCOR1	HCFC1
ZNF189	MAFK	RELB	RCOR2	EHMT2	MIXL1	RNF2	RNF2	EBF1	RAD21	TCF12	UBTF	MYNN	CUX1			GLIS1	STAT3	ZNF366	RNF2	RXRA	ZBTB10	MCM2	NRF1	ZSCAN5C	ELF1	ZNF654
INSM2	CEBPZ	ARNT	RERE	BATF	NCOR1	LEF1	LEF1	CBFB	PHF8	ZBED1	HCFC1	RBM22	SIX4			ZFP69B	RXRA	BCL6B	IKZF2	USF1	MAZ	CEBPG	IKZF1	ZBTB44	FOXA2	TRIM22
ZNF362	BCL6	SOX5	AHR	EP400	HNF4G	IKZF2	IKZF2	ZNF146	ZGPAT	TARDBP	DEK	GABPA	SMC3			L3MBTL2	ZBTB33	ZNF660	RUNX3	CEBPA	MBD2	RBM22	RB1	TCF12	PRDM10	SMC3
GLIS1	CBX1	RB1	ZGPAT	SMARCA4	GABPA	CBFA2T3	CBFA2T3	BATF	ZNF592	EED	ZNF654	DRAP1	NFIB			SP3	MAFF	ZEB2	RELB	NRF1	TRIM22	L3MBTL2	ZFP37	SMAD4	FOXA1	MIER2
PRDM4	CREM	MBD1	SKI	MAFG	FOXA3	ZFP37	ZFP37	IKZF1	L3MBTL2	DPF2	TRIM22	ZKSCAN1	RFX1			ZNF692	FOXA1	ZNF629	GATAD2B	HMG20A	ELK1	MGA	FOXM1	RARA	ZNF687	ZNF384
ZNF18	ZNF843	GATAD2A	TEAD1	NCOA1	NR2F2	ZNF362	ZNF362	BMI1	ZBTB7B	EZH2	ELF1	TAL1	MTA1			PATZ1	NFE2L2	KLF8	SMARCA4	RXRB	CHD1	CEBPA	ZNF530	ETV4	MNT	ZNF644
ZFP69B	HLTF	TGIF2	HCFC1	ZEB2	HLF	ZNF518A	ZNF518A	NR2F1	USF1	RUNX3	RFX5	E4F1	ZNF579			GLIS2	MAX	TSHZ1	KLF9	CEBPG	ZNF341	CHD4	GATAD1	TEAD3	NR2C1	MIXL1
SP7	SUPT5H	SOX13	RUNX1	MTA2	CEBPA	ZBTB21	ZBTB21	JUNB	KDM1A	NBN	RXRA	GLI4	PPP1R10			ZBTB17	EGR1	NCOR1	FOXA1	NFIL3	ARNT	BCL6	MXD3	BCL6	ZNF341	ARID2
TRIM28	PTBP1	RNF2	USF2	GLIS1	ZNF654	TRIM28	TRIM28	STAT3	PRDM6	ETV6	ETV4	ZFP91	OVOL3			ZNF777	TAF1	IRF2	KDM6A	ZNF644	SSRP1	NR2F6	ZNF792	SOX5	PRDM6	FOXK2
ZNF366	ZBTB48	FOXA3	ZNF318	TEAD4	TRIM22	ZNF629	ZNF629	TCF7	PRDM4	RELB	SCRT1	TEAD3	DNMT3B			PRDM1	GATA2	CTBP1	SAP130	GATAD2A	ZNF217	PPARG	ZNF48	HMG20A	ZBTB8A	FOXA3
ZNF561	ZBTB40	ZNF511	FOXK2	ZC3H8	TEAD3	ZBTB6	ZBTB6	ZNF217	PRDM10	ARNT	MAFG	ZSCAN5A	CEBPA			ZBTB26	EZH2	SIN3B	MIER3	FOXA3	ZNF639	GATAD2A	TOE1	ELF3	HNRNPL	ZNF444
BCL6B	KLF16	KAT2B	FOXM1	CREM	ZNF2	YY1	YY1	MEIS2	ZBTB20	MLLT1	RB1	BCL6	RCOR1			SCRT2	TBP	NBN	ZSCAN9	ZC3H8	NR2C1	FOXA3	BACH1	NR2F6	BCL11A	BCL6
L3MBTL2	GTF2F1	ZNF384	RAD51	ZNF133	ZEB2	CEBPA	CEBPA	ZNF133	ZNF335	BCLAF1	TOE1	ESRRA	MAZ				RELB	SKIL	SMAD4	ZNF384	IRF2	ZNF654	GLIS1	ZNF644	RCOR1	SMARCE1
KLF10	ZNF318	PYGO2	ZNF143	L3MBTL2	ZFP37	DEK	DEK	ARID3A	NR2F1	ZNF592	ELF3	ATF1	ZMYM3				NCOR1	TAL1	ETV4	ZNF664	KMT2B	TRIM22	TFAP4	SOX13	MAZ	RFX1
YY2	HDAC2	CUX1	SP7	HDAC1	MEIS2	FOXA2	FOXA2	TARDBP	KLF1	SMARCA5	ZNF660	CBX1	SSRP1				BRCA1	NCOA2	RARA	ZNF362	MXD4	SMC3	ELF3	ZNF791	MBD2	ELF1
CTBP1	MYC	LARP7	HDAC1	ZC3H11A	ARID2	TEAD3	TEAD3	CREM	NCOA3	NKRF	ARID2	CREM	CHD4				TAF9B	ATF1	TBP	RFX1	SMAD5	DDX20	ZFX	GATAD2A	HES1	NFIB
ZBTB12	TAF1	SIX4	GABPB1	KLF1	MTA3	ZNF843	ZNF843	MTA2	MTA3	NFE2L2	ZNF143	MBD1	KLF11				TAL1	ZNF318	TEAD3	ZNF687	ZNF623	TOE1	ARID3A	XRCC5	ARNT	ARID3A
ZBTB8A	PRDM6	DDX20	SMARCE1	ARID1B	MTA2	ZNF189	ZNF189	IKZF2	BMI1	ZNF687	GABPA	ZNF843	FOXA2				NCOA2	HDAC2	THRB	MNT	KLF11	HSF1	L3MBTL2	TCF7	SMAD5	MTA2
ZSCAN4	PRDM10	PAX8	ATF3	NFATC3	PBX2	HNF4A	HNF4A	LEF1	MAZ	ZSCAN29	FOXA3	HLTF	SOX5				HDAC2	EHMT2	BCL6	ARID2	TAF9B	ARID2	NFIA	FOXA3	TAF9B	ZKSCAN1
ZXDB	RFX5	TOE1	CTBP1	SMARCE1	ZNF444	ATF4	ATF4	DPF2	MTA1	PAX8	CC2D1A	SUPT5H	HMG20A				STAT5A	PRDM10	CREM	ZNF579	ETS1	CC2D1A	KLF5	ZNF580	RUNX1	CHD1
ZEB2	KDM1A	YBX1	IKZF1	ATF3	RAD51	BCL6B	BCL6B	RUNX3	SP2	PRDM1	SP1	PTBP1	ZNF644				ZEB2	EP400	KAT2B	ZNF512B	SAP130	BRD9	JUN	ZBTB40	IRF4	PAX5
ZNF629	EP400	GATAD2B	ATF2	FOS	TOE1	ZXDB	ZXDB	NBN	USF2	SIN3A	SCRT2	ZBTB48	TBL1XR1				TCF12	FOXK2	TBX3	ZNF207	ZFP64	SMARCA4	ZNF366	ZNF384	GABPA	TOE1
ZNF692	FOXK2	NFRKB	RUNX3	PATZ1	BCL11A	ZNF692	ZNF692	RELB	NFYC	MAZ	ELK1	ZNF146	MBD1				NR2F6	FOXM1	HHEX	BMI1	RFX5	ZNF444	NKRF	ZNF664	ZNF316	STAT1
FOXA1	THRAP3	COPS2	USF1	RNF2	IRF4	ZNF680	ZNF680	GATAD2B	MEIS2	TAF1	ZNF217	ZBTB40	NCOR1				TEAD4	TCF12	NRF1	ZKSCAN1	IRF4	ESRRA	ZNF561	ZXDB	NBN	SMAD5
OSR2	ZNF24	SMARCA5	NRF1	SOX6	SMARCA5	TEAD1	TEAD1	ARNT	ZNF184	EGR1	SIN3A	KLF16	TGIF2				MEIS2	TAF7	HMG20A	CC2D1A	ZNF513	TAF1	ARID4B	ZNF558	SKIL	RAD51
MZF1	ZNF189	PPP1R10	NR2C1	ATF7	EBF1	IRF4	IRF4	KDM1A	ATF3	ZNF384	EGR1	SPI1	XRCC5				HDAC1	DPF2	HMG20B	ZNF217	TRIM25	HDAC1	NFIL3	RXRA	CBFB	USF2
GFI1B	SMARCA4	HDAC2	ZNF10	GATAD2B	ELF1	GABPA	GABPA	MLLT1	CBFA2T2	MYC	NCOA3	MYRF	SMARCC2				CBFA2T2	HDAC1	ZNF792	PRDM10	GABPA	POU5F1	KLF10	USF2	ZBTB5	ZNF362
PRDM10	FOXM1	ZNF398	HIC1	RUNX3	STAT5A	JUNB	JUNB	ZIC2	SREBF1	CTCF	ZFX	GTF2F1	ZKSCAN8				ZNF24	ARID1B	ZNF3	MEIS2	THAP11	ZNF140	HLF	GATA3	NFE2	EGR1
ZBTB17	SOX5	SIN3A	PRDM6	LEF1	PAX5	ARID3A	ARID3A	ZNF341	MGA	TBP	USF2	ZNF318	SOX13				CTBP1	NFATC3	LCORL	HLF	ZSCAN9	NANOG	SP3	RFX1	MYNN	ZSCAN4
KLF8	NRF1	SP3	ZNF362	AFF1	BMI1	HLF	HLF	ETS1	NCOR1	ZNF143	ATF7	HDAC2	PHF8				SOX6	ZNF512	GATA4	TCF7L2	SIN3B	ZNF579	ZBTB8A	BRCA1	NCOA2	ZXDB
TSHZ1	ZNF2	EGR2	ZNF398	CBFA2T3	JUNB	MNT	MNT	SP2	ZFP91	ZBTB33	USF1	BCL11B	ELK1				RNF2	RNF2	RXRB	YBX1	RXRA	USF1	ZNF660	DEK	SUPT5H	XRCC5
NR2F2	MAFG	EZH2	ZNF366	ZBTB2	ZBED1	SPI1	SPI1	ZBTB48	THRB	GLIS2	RCOR1	MYC	GTF2A2				NR2F1	HDGF	NR2F6	ZNF592	SMAD4	ELF1	ZNF791	ZNF217	ZNF318	TARDBP
ZNF423	ZC3H8	CBX8	ZSCAN4	EMSY	ARID3A	MTA1	MTA1	ZFP37	EGR1	ZBTB17	IRF4	TAF1	HIC1				ZNF184	TRIM24	ELF3	MAX	SKIL	ZNF513	ZXDB	MAX	HDAC2	USF1
ZSCAN5C	INSM2	USF2	OSR2	ZNF335	TARDBP	CREM	CREM	KLF1	NR2F6	ZNF579	CBFB	BCLAF1	ZNF639				ZNF132	IKZF1	CEBPG	FOSL2	CBFB	SMARCE1	ZNF24	CUX1	STAT5A	BACH1
OVOL3	DIDO1	ZBTB17	PRDM10	MGA	CREM	MTA2	MTA2	ZBTB8A	ARID1B	RAD21	BATF	PRDM6	ZNF148				ZNF571	SOX6	KDM3A	IRF9	ZBTB33	ATF3	LEF1	ZHX1	BATF	TCF7
PRDM1	IKZF1	ZFHX2	ZBTB17	THRA	EED	HCFC1	HCFC1	PATZ1	MCM2	KDM1A	BHLHE40	ZBTB1	ZNF132				RFX1	ZNF740	JUN	EP400	KAT7	AFF1	ZNF143	NCOA3	IRF9	SREBF1
ZBTB44	ZNF384	ZBTB26	RXRA	CEBPG	DPF2	RCOR1	RCOR1	GLIS2	DACH1	ZNF444	STAT5A	PKNOX1	ZNF658				NFIB	CHAMP1	HNF1A	ATF4	ETV4	WT1	TARDBP	MNT	EP400	TBL1XR1
WT1	RB1	KLF6	MAX	NFIC	NBN	MAZ	MAZ	ZNF423	IKZF1	ZNF335	PAX5	ZSCAN23	SCRT1				PRDM4	GATAD2B	PPARG	JUNB	RARA	ZNF580	ZNF629	ZHX2	FOXK2	ZNF660
KLF6	ZFP37	ZNF580	ZNF133	MBD2	ETV6	NFIB	NFIB	ZBTB26	TRIM24		IRF5	EHMT2	INSM2				LCORL	LEF1	MLX	NFE2L2	MYNN	ZEB1	XRCC5	ESRRA	SMARCA4	SAP130
NCOR1	HNF4A	SIX5	NR2F2	NONO	RELB	ZNF24	ZNF24	ZNF592	RBFOX2		BMI1	ZNF512B	FOXM1				ZNF350	CC2D1A	ZNF384	RNF2	DRAP1	ZNF623	MTA1	ATF7	FOXM1	SMAD4
RCOR1	NFATC1	KLF17	ZNF580	HES1	ZBTB40	MTA3	MTA3	IRF4	NR2C1		HDGF	ZNF8	ZBTB7A				BCL6B	AFF1	MIXL1	ZNF354B	ZKSCAN1	ETS1	ZNF687	ZNF707	MAFG	TEAD3
ZNF10	EGR1	NCOR1	ZNF600	ARNT	GATAD2B	ZHX2	ZHX2	MYC	CBFA2T3		NR2F1	ZNF624	ZNF324				KLF10	NR2C1	SP5	TRIM24	E4F1	ZNF433	PATZ1	SIN3A	PAX5	ZNF792
DNMT3B	ZNF664	ZIC2	FEZF1	SKIL	BCLAF1	ZNF579	ZNF579	PAX5	NR2F2		MTA3	MAFK	HLF				ZNF660	NR2F1	NCOR1	NFRKB	DMAP1	ZNF530	CHD2	ZNF600	NCOA1	ZNF48
NFIC	CHAMP1	KLF9	TCF7L2	MYNN	ZNF316	GTF2F1	GTF2F1	NFATC1	THRA		BACH1	EP400	ZNF660				ZNF544	SMARCA5	NFKBIZ	GTF2A2	GLI4	ZNF518A	OSR2	ZNF639	ZEB2	LCORL
ZNF207	GATAD1	HIC1	FOSL2	NCOA2	TEAD4	BMI1	BMI1	TBL1XR1	ZNF8		ARID3A	FOXK2	LARP7				ZNF776	CBFB	SMARCC2	MYC	ZFP91	ZC3H11A	RFX1	ZEB1	NFATC1	IKZF5
BRCA1	HDGF	ZBTB10	ZNF843	HLTF	CBFA2T2	KLF6	KLF6	ZNF687	E2F8		TARDBP	THRAP3	ZNF747				ZNF512	BACH1	IRF2	NCOR1	TEAD3	ZNF202	LARP7	INSM2	EGR1	NFIL3
MAZ	MXD3	ZNF207	SCRT1	STAT5A	MAZ	DNMT3B	DNMT3B	ZNF580	FOXK2		EZH2	ZNF24	SCRT2				ZNF114	TCF7	ZKSCAN8	NFIC	THRB	ZNF560	IRF2	TRIM28	BMI1	PPARG
MBD2	NR2F1	RCOR1	ZNF2	MCM7	KLF9	SSRP1	SSRP1	ZNF600	NONO		NBN	ZNF189	YY1				ZNF626	ZNF398	REST	TAL1	ZSCAN5A	ZBTB8A	MZF1	ZNF366	MTA2	NCOR1
NONO	HMG20B	CHD2	INSM2	FOXM1	SP5	MXD4	MXD4	ZBTB10	ZNF507		RELB	STAT5A	ZSCAN9				ZNF112	ARID3A	ETS1	NCOA2	NUFIP1	ZNF629	ZNF239	BCL6B	MTA3	ZNF579
ELK1	TAF7	NONO	ZNF664	POLR2A	ZNF341	KDM6A	KDM6A	KLF9	TARDBP		GATAD2B	SCRT1	RXRA				ZNF174	TARDBP	RCOR2	HDAC2	BCL6	ZNF680	TRIM22	ZNF629	MAFK	RCOR2
HES1	HNRNPH1	CHD1	PRDM4	ATF4	FOSL2	KLF11	KLF11	KLF16	MLLT1		ARNT	FOXA1	CBX2				ZNF37A	ZNF687	RERE	STAT5A	CREM	ZNF266	GLIS2	GFI1B	ATF2	DNMT3B
MNT	ZNF792	ZMYM3	ZFP69B	RFX1	ZNF133	SAP130	SAP130	ZSCAN23	CEBPA		MLLT1	SMARCA4	CAVIN1				SCRT2	IKZF2	RBFOX2	FOXM1	MBD1	ZNF558	SOX13	ZBTB17	JUNB	HOMEZ
CHD1	ZNF48	ZNF639	ZNF561	GATA2	MTA1	HOMEZ	HOMEZ	ZNF624	TBX3		BCLAF1	SOX5	STAT3				ZBTB44	PAX8	ZBTB25	TCF12	ZNF843	ZNF138	ZBTB6	KLF8	ZMYM3	ZFP64
ZMYM3	FOXA1	ZNF148	ZSCAN21	GMEB1	ZBTB21	ZNF511	ZNF511	SCRT1	NFATC1		ZNF10	NRF1	ETV6				MNT	RELB	TFE3	MTA2	FOXP1	ZBTB11	GABPA	OVOL3	MAFF	RARA
ARNT	MIER2	NR2C1	ZNF660	TBL1XR1	BCL6	MIER3	MIER3	ZNF2	TFAP4		HIC1	ZNF2	SREBF1				EHMT2	ZBTB40	ZGPAT	ARNT	ZNF205	OVOL3	GTF2F1	CEBPG	MEIS2	HMG20A
SSRP1	ATF4	ZEB1	ZEB2	DACH1	SOX5	THAP11	THAP11	ZNF547	ZNF133		ZFP37	MAFG	ZNF507				IRF9	BCLAF1	SKI	HDAC1	KDM5A	MAX	TFDP1	HIC1	CREM	RXRB
MAX	ZNF518A	KLF7	ZNF629	KHSRP	ZKSCAN1	ZSCAN9	ZSCAN9	HDAC2	HNRNPL		ZNF133	PAX5	MZF1				EP400	STAT5A	TEAD1	TBL1XR1	SPI1	MEIS2	ZNF501	ZNF341	HDAC1	ELF3
KMT2B	ZNF3	KMT2B	MEF2D	KLF16	GATAD2A	SMAD4	SMAD4	ZBTB21	E4F1		SP7	ZEB2	BCLAF1				FOXK2	NCOA1	ZNF600	CBFA2T2	HDAC2	CREM	DPF2	TBP	TEAD2	JUN
MXD4	ZSCAN29	MXD4	ZNF335	DDX20	MAFG	KAT7	KAT7	ZNF18	YY1		ZNF366	TCF12	DPF2				DIDO1	EGR1	HIC1	ZNF512	STAT5A	GMEB1	PHF8	ZNF146	GABPB1	ARID1B
SMAD5	RBBP5	SMAD5	ZBTB44	TRIM24	EMSY	DRAP1	DRAP1	ZFP69B	TOE1		ZEB2	ZC3H8	RUNX3				L3MBTL2	PHF20	TAF1	LEF1	ZHX1	TBL1XR1	ZSCAN29	MYC	ZBED1	ZNF24
HCFC1	NFYC	HCFC1	NR2F1	IKZF1	ZNF792	BCL6	BCL6	L3MBTL2	FOXA2		ZNF629	SMARCE1	SP1				GMEB1	SMARCE1	ZBTB8A	SOX6	EHMT2	SOX6	ARNT	STAT5A	ARID1B	DACH1
KDM6A	NR2F6	KDM6A	WT1	CHAMP1	NFIA	MBD1	MBD1	KLF10	ZSCAN4		ZNF501	SNIP1	SMARCA5				GTF2F1	ZNF184	PRDM10	TCF7	PRDM10	MTA3	RNF2	HNF4A	GMEB1	TFDP1
CHD4	BACH1	KLF11	ETV4	MTA3	HNF1A	FOXP1	FOXP1	ZEB2	JUND		KLF8	INSM2	BHLHE40				NFRKB	KDM1A	ZBTB26	CBFA2T3	BATF	GATAD2B	FOXA3	NR2F1	ARID3A	TFE3
ZNF623	RLF	TAF9B	ZNF652	CBX3	SOX13	KDM1A	KDM1A	RBAK	ELK1		REPIN1	IKZF1	RB1				CHAMP1	GTF2F1	ZNF335	PML	EP400	ZBTB2	REPIN1	GLIS1	MLLT1	TEAD1
KLF11	GLIS1	SAP130	ZNF644	FOXK2	TEAD1	FOXK2	FOXK2	ZBTB6	CEBPG		ATF3	ZNF384	IRF5				LEF1	RBFOX2	HCFC1	PHB2	FOXK2	MAFF	ZBTB20	MEIS2	TBL1XR1	SMARCA4
TAF9B	PRDM4	ZNF610	HNRNPL	ZKSCAN1	ZNF10	SOX5	SOX5	ZNF777	KAT7		KDM6A	RB1	KLF5				MGA	BRD9	KLF6	PBX2	MLLT1	IRF4	NFXL1	ATF3	ATF3	TCF7L2
KLF9	ZNF18	HOMEZ	HNF4G	ZBED1	ZNF639	ARNT	ARNT	ZSCAN5C	HBP1		CHD4	ZFP37	ZNF311				RCOR1	ZBTB2	ZNF580	ELF3	ZNF189	ZNF316	GATAD2B	ZBTB8A	PHF21A	RBPJ
ZNF610	ZFP69B	ZFP64	MNT	ZSCAN29	ZNF585B	GATAD1	GATAD1	ZSCAN16	ATF4		SAP130	HNF4A	ZNF143				CHD1	PHB2	DPF2	SAP130	TBX3	PAX5	ZNF777	MTA2	KDM1A	ETS1
HOMEZ	ZNF143	MIER3	TFE3	MEF2D	ZBTB48	HBP1	HBP1	KLF7	NFIL3		FOXA2	NFATC1	RELB				NR2C1	CEBPA	ZNF10	SMAD4	SCRT1	MAFG	ZBTB11	TRIM24	DACH1	SKI
ZNF511	RXRB	TRIM25	DPF2	BRD9	SCRT1	RBPJ	RBPJ	FOXA2	HLF		HOMEZ	EGR1	GATAD2B				IRF4	HOMEZ	ZBTB10	ETV4	FOXM1	SMAD5	RBFOX2	ZNF621	TARDBP	DEK
SP2	ZNF837	NKRF	ZNF592	SMARCA5	GATA4	ZNF792	ZNF792	FOXA1	SPI1		MIER3	BMI1	ARNT				EBF1	FOXA2	NFIC	TEAD3	SOX5	RELB	TFE3	NFE2	GTF2F1	ZNF217
ZFP64	ATF1	THAP11	ARNT	TARDBP	SP7	MIER2	MIER2	ZNF324	CREM		THAP11	HMG20A	MLLT1				PAX5	RXRA	RCOR1	ZNF792	PAX5	BCLAF1	ZNF423	BACH1	KLF16	SSRP1
MIER3	ZNF217	ZSCAN9	NFATC3	PML	TRIM28	ZNF3	ZNF3	RFX5	IKZF2		SMAD4	MTA2	KLF17				NFATC1	IRF9	MAZ	EGR2	NCOA1	CBX1	ZFHX2	ARID1B	RAD51	RFX5
NFATC3	MEIS2	SIN3B	SKIL	PHB2	ZNF561	NFYC	NFYC	KLF8	ZNF189		ZBTB33	ZNF547	ZNF600				BMI1	SOX5	MBD2	NANOG	ZEB2	RCOR1	ZGPAT	TAF1	HDGF	THAP11
GABPA	IKZF5	SAFB	RBM22	MTA1	ZSCAN21	TFAP4	TFAP4	KLF17	EZH2		FOSL2	GATAD1	REST				HDGF	ATF3	CHD2	ZFHX2	GTF2F1	GTF2F1	SKI	RNF2	TRIM24	SCRT1
THAP11	ELF3	SMAD4	SPI1	KLF9	ZNF660	ZNF143	ZNF143	ZNF384	BCL11A		RARA	RAD51	CTBP1				MTA3	FOXA3	UBTF	TEAD1	SRF	NR2F2	BCLAF1	HNF4G	SOX6	HBP1
ZSCAN9	ZKSCAN1	SKIL	MYC	SP2	KLF16	ZNF652	ZNF652	ZNF16	IRF4		DRAP1	HDGF	NFATC3				BACH1	TEAD1	ELK1	ZNF623	ZC3H8	SMARCA5	MGA	SMARCA4	NFRKB	ZNF580
SIN3B	KLF1	CBFB	ZC3H8	DMAP1	ZNF629	RXRB	RXRB	ZBTB7A	CBFB		TEAD3	MXD3	SIN3B				TCF7	YY1	IRF3	NCOA3	DIDO1	ZNF600	KLF17	PBX2	ZNF740	ARID4B
RXRA	PHF20	ZBTB5	CHAMP1	ZSCAN5A	XRCC5	ATF1	ATF1	XRCC5	BATF		TBP	MAFF	ZNF316				KLF5	ZNF518A	SIN3A	ZSCAN4	NCOA4	ZBTB7B	ATF3	FOXA2	CHAMP1	KDM4B
EBF1	ARID3A	KAT7	ARID3A	NRF1	ZNF692	NR2F6	NR2F6	ZNF558	PAX5		BCL6	NR2F1	ZFP91				ZBED1	ZBTB17	ZNF341	ZNF692	ZNF384	TEAD3	ZNF184	FOXP1	ATF7	IRF2
SMAD4	SP7	ETV4	L3MBTL2	ZNF664	PATZ1	ELF3	ELF3	ZNF512B	ATF2		HMG20A	HMG20B	ZNF2				TBL1XR1	ZSCAN29	ZNF217	ZIC2	RB1	ZNF146	HIC1	MIER2	GATAD2B	RB1
SKIL	L3MBTL2	RARA	GATA2	ZNF652	GLIS2	IKZF5	IKZF5	ZNF501	JUNB		RBPJ	TAF7	ZC3H8				LARP7	ZNF335	NR2C1	MBD2	ZFP37	NFIB	ZEB1	IRF2	CBX3	CC2D1A
CBFB	HDAC1	DRAP1	XRCC5	NCOA6	ZBTB17	ZNF580	ZNF580	ZNF444	BACH1		LCORL	DPF2	SP7				EED	NFE2	ZEB1	NONO	IRF5	NCOA3	ZNF223	BMI1	POLR2B	PRDM1
ZBTB33	KDM3A	TAL1	CHD2	SUZ12	KLF8	KDM3A	KDM3A		NKRF		MAX	RBPJ	ZNF366				ZSCAN29	ZNF384	KMT2B	TAF9B	EGR1	TBP	KLF7	ZNF157	ETV6	KLF6
KAT7	NFIA	DMAP1	HDGF	GLIS2	ZBTB44	NFIA	NFIA		EED		ZNF652	CBLL2	ZSCAN21				NBN	MEIS2	SMAD5	NFATC3	ZNF664	NFE2L2	ZNF623	ZNF335	RELB	CHD4
USF2	KLF5	ZFP91	SOX6	ZBTB20	NFIC	ARID4B	ARID4B		RELB		RXRB	MTA3	MIXL1				PAX8	KLF1	ELF1	TRIM25	GATAD1	ZKSCAN1	KLF9	MAZ	LEF1	CUX1
RARA	ATM	ASH2L	TRIM28	ZBTB26	NFE2	ZNF785	ZNF785		ARNT		IKZF5	ZNF792	DACH1				ETV6	KLF16	TAF9B	NBN	MXD3	CHD1	ZNF610	MTA3	GATAD2A	CTBP1
ETV4	GABPB1	ZSCAN5A	CC2D1A	UBTF	EHMT2	NFIL3	NFIL3		BCLAF1		KDM3A	ARHGAP35	ZXDB				ARNT	PKNOX1	ZNF610	SKIL	NR2F1	MAZ	STAT3	ATF2	CC2D1A	MIER3
DRAP1	PKNOX1	NUFIP1	AFF1	ZNF580	ZNF362	NR2F1	NR2F1		ZNF316		JUN	ZNF48	ARID2				BCLAF1	MNT	SP2	MYNN	HBP1	TEAD4	TCF7L2	ZNF561	BCOR	ZSCAN9
DMAP1	TRIM28	BCL6	MLLT1	ZBTB7B	ATF4	ZNF644	ZNF644		ZNF654		ARID4B	ZNF362	FOXK2				ELF1	PML	RFX5	HLTF	HMG20B	IKZF2	NFE2	ZNF692	ELK1	THRB
ZFP91	JUN	CREM	HDAC2	ZZZ3	NR2F6	PPARG	PPARG		SMC3		ZNF384	HNRNPL	HDGF				ELK1	ZNF610	TRIM25	ZNF318	RAD21	GABPA	GLI4	PATZ1	MEF2D	GATAD1
ASH2L	ZNF366	SUPT5H	SMARCA4	ZNF512B	ARID1B	MIXL1	MIXL1		KDM3A		NFIL3	JUNB	EMSY				ZFP69B	FEZF1	SMC3	NCOA1	TAF7	EED	BCL11B	ZNF501	HMBOX1	HMG20B
TEAD3	ZNF561	ZNF205	ERF	ATF2	SMARCE1	ZNF660	ZNF660		XRCC5		HNF1A	TOE1	ZNF592				ZNF692	ZNF513	NKRF	ZEB2	RBPJ	NBN	ZBTB1	GATAD2B	AFF1	TFAP4
THRB	ARID1B	FOXP1	ZIC2	NCOA3	DACH1	SP5	SP5		OSR2		PPARG	NFYC	SMAD5				CHD2	TCF7L2	GABPA	DIDO1	ZNF48	ETV6	ZSCAN23	MLLT1	BRD9	GATA4
ZSCAN5A	ARID4B	KDM5A	RCOR1	ZNF366	RNF2	GATAD2A	GATAD2A		RB1		MIXL1	STAT1	ZNF585B				OSR2	ZNF843	THAP11	CAVIN1	FOXA1	CHD2	ZNF624	BCLAF1	PML	NR2F1
CEBPZ	NFIL3	ZBTB48	MBD2	CREB1	TRIM24	TGIF2	TGIF2		CC2D1A		SP5	BACH1	GLI4				GFI1B	PRDM6	SIN3B	ZNF48	ATF2	ARNT	SCRT1	KLF17	ZBTB2	HNF1A
BCL6	SMARCE1	ZNF146	NONO	ZNF239	SOX6	XRCC5	XRCC5		ZNF341		NCOR1	ZBTB21	ZSCAN5A				ZNF121	ZNF2	DDX20	RLF	MIER2	MLLT1	INSM2	ZIC2	EMSY	MLX
CBX1	GMEB1	KLF16	HES1	ZBTB17	PML	KAT8	KAT8		KLF9		CREB1	NFIB	IRF9				KLF6	GLIS1	NBN	GLIS1	ZNF518A	TEAD1	CHD1	ZNF2	SCRT2	TGIF2
HLTF	E2F4	MYRF	SSRP1	BMI1	SMARCA4	IRF2	IRF2		ZNF366		TAF1	GLIS1	EP400				ZNF600	PRDM4	USF2	ZBTB40	ZNF3	ZNF610	ZNF518A	ZNF398	BCLAF1	KAT8
SUPT5H	KLF10	TAF1	ZNF217	HDGF	MYNN	ZKSCAN8	ZKSCAN8		KLF10		KAT8	RBM39	DIDO1				ZNF10	ZNF18	MYNN	TFAP4	TOE1	ZEB2	ZBTB21	L3MBTL2	THRA	RERE
PTBP1	PAF1	ZHX1	KDM6A	LARP7	ZNF335	HNF4G	HNF4G		KLF8		IRF2	LARP7	ZNF416				PRDM1	POU5F1	DRAP1	IKZF5	NFYC	ARID3A	AEBP2	USF1	CEBPA	ZGPAT
ZBTB48	HNF1A	ZSCAN23	TAF9B		ZNF600	SOX13	SOX13		HDAC2		ZBTB26	PRDM4	TAF7				FOXA2	ZNF561	CEBPZ	CREM	STAT1	HCFC1	ZNF768	RCOR1	THAP11	MBD2
ZBTB40	YY2	KDM1A	BHLHE40		ZNF843	TAF1	TAF1		MAFK		HNF4G	TFAP4	NR2F6				SIN3A	KLF10	ATF1	RUNX1	ZBTB21	MBD2	PRDM4	ELF1	TEAD3	FEZF1
KLF16	PPARG	EP400	ZNF511		ZNF189	TFDP1	TFDP1		SOX6		ETS1	ZNF398	ZNF26				KDM4B	ZNF324	SUPT5H	GATA2	RLF	NONO	ZNF18	PAX5	BRCA1	SIX4
GTF2F1	ZNF324	FOXK2	ZSCAN9		INSM2	EGR1	EGR1		TBL1XR1		NR2C1	TEAD4	ZNF785				TCF7L2	ZBTB8A	ZNF205	TEAD2	ZNF768	CBX3	ZFP69B	NFATC1	SCRT1	SIN3A
ZNF318	MLLT1	ZNF189	SIN3A		ZNF518A	PHF8	PHF8		PHB2		NR2F2	ZMYM3	ZNF792				THRAP3	ZXDB	KDM5A	GMEB1	PRDM4	SREBF1	ZNF837	ARID3A	ZFP69B	GATA3
HDAC2	MLX	TBX3	MYNN		HDGF	RFX3	RFX3		TCF12		SKI	ZFP69B	ZNF169				ZNF2	NANOG	ZBTB40	ZNF184	TFAP4	ZHX2	ZNF701	TBL1XR1	IKZF5	TRIM28
TAF1	HLF	FOXM1	TBP		OSR2	FOXA3	FOXA3		RNF2		TEAD1	ZNF143	YY2				JUN	ZNF221	HDAC2	MLX	TEAD4	BMI1	ZFP41	RAD51	NFIA	TBP
EP400	TBL1XR1	ZNF2	THRB		GTF2F1	RFXANK	RFXANK		RFX3		NFIC	ZNF350	ZBTB12				ELF3	OSR2	PKNOX1	PHF21A	RXRB	HIC1	KLF1	NBN	ARID4B	RNF2
FOXK2	SOX13	NCOA1	GATA3		OVOL3	RCOR2	RCOR2		ZBTB10		FEZF1	RXRB	ATF1				NCOA3	GFI1B	EP400	GATAD2B	NR2F6	NFIC	ZNF169	KLF7	ARID2	SOX6
THRAP3	CTBP1	ZC3H8	STAT5A		KLF17	AHR	AHR		ATM		ZNF843	ZNF837	TSC22D4				SP7	ZSCAN5C	FOXK2	DACH1	CSDE1	SAP130	ZSCAN26	ZNF623	ZNF692	KLF9
SMARCA4	ZBTB12	INSM2	MCM7		HIC1	NR2C1	NR2C1		ZNF311		ZNF189	MEIS2	NFE2L2				KLF1	OVOL3	MLLT1	KHSRP	PYGO2	HOMEZ	ZNF324	ZNF433	PATZ1	KMT2B
FOXM1	ZSCAN21	DIDO1	EHMT2		ZSCAN16	ZBTB25	ZBTB25		HNRNPH1		NFIB	CSDE1	ZFX				SP3	ZBTB44	ZNF189	GTF2F1	IKZF5	NFE2	ZBTB12	ZBTB1	IRF2	MXD4
SOX5	PHF21A	ZFP37	IRF9		ZNF148	TFE3	TFE3		HDAC1		NFIA	IKZF5	ZNF354B				ZSCAN4	MIER3	ZNF2	ZHX2	ELF3	ATF1	ZSCAN21	ZSCAN23	FOXA3	KDM6A
NRF1	SP3	HMG20A	EP400		NONO	ZGPAT	ZGPAT		LEF1		TGIF2	ZFX	TRIM24				ZXDB	SMAD4	RAD51	CHD2	PHF20	ZNF205	ZSCAN4	ZNF530	TEAD1	ZNF511
ZNF2	ZBTB8A	GATAD1	FOXA1		SP2	SKI	SKI		MEF2D		ZNF341	ARID3A	GFI1B				KAT8	FOSL2	RB1	KAT8	ZNF16	ZNF318	ZEB2	ZNF547	ZNF335	ETV4
MAFG	MIXL1	CAVIN1	NCOA1		ZSCAN5A	ERF	ERF		ZNF768		RAD51	SP7	CBX3				MYNN	DRAP1	ZFP37	ATF2	SREBF1	NCOA1	ZNF558	ZNF518A	ERF	DRAP1
ZC3H8	ZNF660	MXD3	NFE2L2		ZNF512B	GLIS1	GLIS1		GATAD2A		SP2	L3MBTL2	LEF1				KLF8	TEAD3	EGR1	CHAMP1	KDM3A	ZBTB21	GFI1B	ZNF514	TFAP4	MBD1
DIDO1	DACH1	HBP1	DIDO1		TAF1	HIC1	HIC1		SSRP1		TCF7L2	NR2F6	CC2D1A				ZFHX2	MBD1	GATAD1	MTA3	NFIA	PRDM4	BCL11A	ZBTB21	ELF3	ZNF205
RB1	ZXDB	HMG20B	RLF		HDAC2	ZNF639	ZNF639		SMAD4		E4F1	HDAC1	BCOR				MAZ	HMG20A	HBP1	ATF7	KLF5	RXRB	ELF4	AEBP2	NANOG	TBX3
ZFP37	ZNF280D	TAF7	TFAP4		PRDM4	BCL11B	BCL11B		RBM22		SRF	KDM3A	MEF2D				SMARCA5	ZNF792	ZNF362	CBX3	GABPB1	PYGO2	ZNF707	ZNF19	ETS1	HHEX
EGR1	SPI1	RBPJ	GATA4		ZNF18	ZBTB1	ZBTB1		SKI		NRF1	ELK1	CBFA2T3				ASH2L	NR2F6	ZNF518A	TRIM28	ZBED1	ZNF366	KLF8	ZC3H11A	KLF6	HDAC2
ZNF664	EGR2	ZNF792	IKZF5		ZFP69B	INSM2	INSM2		PRDM1		ZNF518A	NFIA	HDAC2				RBBP5	ELF3	ARNT	ZBED1	ZNF561	ARID1B	ATF7	ZNF202	SAP130	ZNF3
CHAMP1	ZEB2	MIER2	TEAD2		ZNF366	ZFP69B	ZFP69B		KLF7		NFYC	KLF5	ZNF622				ZNF580	IKZF5	NFYC	ZSCAN29	ARID1B	ZNF644	TSHZ1	ZFP3	KLF9	KDM3A
GATAD1	GATAD2A	ZNF518A	CUX1		KLF1	MYNN	MYNN		STAT3		SREBF1	TEAD2	ZEB1				KLF17	ZNF644	STAT1	ETV6	ARID4B	ZNF184	FOS	ZNF140	SP2	SP5
HDGF	HNRNPL	ZSCAN29	GMEB1		ZNF785	ZBTB17	ZBTB17		TAL1		L3MBTL2	GABPB1	ZNF623				HIC1	MLX	RLF	MEF2D	ZNF785	ZNF660	ZNF157	ZNF560	SMAD4	ZNF7
MXD3	TGIF2	STAT1	HNF1A		MYC	BCL11A	BCL11A		NFE2		E2F4	NFRKB	ZNF843				ZSCAN16	ZBTB26	NFIB	AFF1	NFATC3	ZNF692	ZSCAN5C	SP3	DMAP1	ZBTB26
NR2F1	XRCC5	RLF	PPARG		L3MBTL2	TSHZ1	TSHZ1		SMARCA4		ZNF687	TRIM28	ZBTB1				ZNF639	RCOR2	GLIS1	NR2C1	NFIL3	RNF2	WT1	ZNF404	TAF1	ZKSCAN8
HMG20B	NFKBIZ	GLIS1	ZNF184		KLF10	WT1	WT1		MAFG		ZHX2	JUN	ZNF518A				ZNF148	ZGPAT	TFAP4	BRD9	GMEB1	PRDM10		ZNF680	ZNF18	ZBTB25
TAF7	ZNF692	TCF7	TBL1XR1		ZNF169	ZNF184	ZNF184		MAFF		GTF2F1	ZNF366	PRDM4				KLF7	ERF	ZMYM3	ZBTB2	ZNF687	ZKSCAN8		ZNF704	ZFX	PBX2
HNRNPH1	DDX20	PRDM4	DACH1		SUZ12	ZNF600	ZNF600		JUN		TFDP1	KLF1	ZNF16				ZNF623	MIER2	ZNF350	ZNF335	HNF1A	BACH1		ZNF138	SP3	ERF
ZNF792	CBFA2T2	TFAP4	SP5		ZSCAN26	ZNF341	ZNF341		ZNF362		ZNF207	ZBED1	KLF10				SAP130	CEBPG	PYGO2	MTA1	ZC3H11A	MEF2D		ZBTB11	SP5	GABPA
MIER2	ZNF687	ZFP69B	KHSRP		ZBTB12	ZEB1	ZEB1		TEAD4		CHAMP1	ZNF561	SP3				SP2	PAF1	ZFX	UBTF	ARID3A	HMBOX1		ZNF585B	MTA1	ZNF652
ATF4	TCF7	RXRB	KLF16		SP3	ZNF623	ZNF623		ATF1		ELF4	ARID1B	ZBTB8A				ZNF513	BCOR	KLF1	SIX4	ZNF324	PRDM1		ZSCAN16	ESRRA	ZNF592
ZNF518A	PATZ1	IKZF5	NFKBIZ		ZBTB8A	ZNF610	ZNF610		ZNF629		ZNF592	ARID4B	ZSCAN4				RARA	KLF9	PHF20	PRDM6	MLX	SCRT2		ZNF610	TFDP1	MAZ
ZNF3	MTA2	ZKSCAN1	DDX20		ZXDB	NFE2	NFE2		NFE2L2		ZNF335	BCL6B	EGR2				GATA3	DNMT3B	SP7	SP7	HLF	E4F1		ZFP37	PHF8	CBFB
ZSCAN29	ZNF512	KLF1	ZHX2		ZNF687	ZBTB48	ZBTB48		EMSY		ZNF622	NFIL3	ZEB2				ZNF146	SSRP1	L3MBTL2	ZNF580	TBL1XR1	NFATC3		ZFP69B	EZH2	ASH2L
RBBP5	RNF2	PHF20	ZNF512		CBX8	EHMT2	EHMT2		FEZF1		KLF6	ZBTB7A	ZNF629				BCL11B	KMT2B	HDAC1	DEK	SOX13	ZNF512		KLF10	RBFOX2	BMI1
NFYC	IKZF2	ARID3A	RFX1		MZF1	ZSCAN29	ZSCAN29		RARA		SIX5	GMEB1	ZNF692				ZBTB1	MXD4	GABPB1	MXD4	ZBTB12	TFAP4		PRDM10	CHD1	MTA3
NR2F6	ZNF7	CEBPG	RNF2		ZNF704	TEAD4	TEAD4		FOXP1		KLF9	E2F4	CHD2				ZSCAN23	CHD4	TRIM28	CHD4	PHF21A	ZHX1		TSHZ1	ZGPAT	NKRF
RLF	KAT8	L3MBTL2	LEF1		ZBTB6	SP7	SP7		ZNF571		DNMT3B	ZNF687	OSR2				ZNF189	ZNF511	ZNF561	THAP11	MIXL1	DACH1		ZNF521	SKI	ZNF680
RXRB	TRIM24	HDAC1	ZNF354B		ZNF501	L3MBTL2	L3MBTL2		SOX5		BRCA1	KLF10	ZNF558				SCRT1	KAT7	ARID4B	CBX1	ZNF660	HNRNPUL1		ZNF8	SREBF2	LARP7
ZNF837	LARP7	SREBF1	TRIM24		ZSCAN18	HDAC1	HDAC1		HHEX		MAZ	SUZ12	BCL11A				SOX5	ETV4	NFATC3	ZNF660	ZXDB	EHMT2		ZNF512	UBTF	YBX1
ATF1	IRF2	KDM3A	TARDBP		ZBTB20	TEAD2	TEAD2		RXRB		MBD2	YY2	PRDM2				INSM2	DMAP1	GMEB1	ZNF7	ARID2	SRF		ZNF444	SIX5	GATAD2B
ZNF217	MZF1	NFIA	NFRKB		ZBTB11	ZNF561	ZNF561		TCF7		CHD2	CREB1	ZSCAN18				ZFP37	ZNF205	E2F4	COPS2	GATAD2A	NFATC1		CHD1	ZNF600	ZIC2
MEIS2	GFI1B	KLF5	MTA3		ZNF423	KLF10	KLF10		ZNF512		SSRP1	ZNF644	KLF8				ZNF664	TBX3	KLF10	CHD1	HNRNPL	GABPB1		NR2C1	IRF3	ZNF207
IKZF5	ZBTB26	GABPB1	GATAD2B		ZNF37A	ZNF324	ZNF324		SOX13		NONO	ZC3H11A	TSHZ1				HMG20A	HHEX	CREB1	ZNF274	TGIF2	RAD51		ZBED1	KLF7	ZNF341
ELF3	IRF3	ZNF366	CBX3		ZBTB26	ZBTB12	ZBTB12		FOXA3		MXD4	ZNF324	REPIN1				ZNF488	GATAD1	TBL1XR1	KLF6	XRCC5	USF2		TARDBP	KMT2B	NR2C1
ZKSCAN1	ZKSCAN8	ARID4B	ZBED1			SP3	SP3		TEAD1		SMAD5	MLX	ZBTB20				CBLL2	HMG20B	ZSCAN21	ZNF341	DDX20	CHAMP1		ZNF687	KLF11	KLF7
KLF1	GLIS2	NFATC3	BCOR			ZBTB8A	ZBTB8A		RUNX1		KLF11	HLF	ZBTB11				ZNF362	TFAP4	PHF21A	KMT2B	KDM4B	TRIM28		ELK1	ZNF511	KLF11
PHF20	ZBTB17	GMEB1	ZSCAN29			ZFX	ZFX		FOSL2		DEAF1	TBL1XR1	ZFHX2				ZNF518A	ZNF652	SP3	KDM6A	PATZ1	LEF1		CEBPA	RFX5	TAF9B
HDAC1	SOX6	E2F4	RBFOX2			PATZ1	PATZ1		STAT5A		SMARCA5	ZBTB12	ZSCAN5C				GLIS1	ZNF580	ZNF660	HOMEZ	CHD2	CBX5		IRF9	MIER3	ZNF610
KDM3A	NFRKB	KLF10	BRD9			ZNF558	ZNF558		ZBED1		ZSCAN9	ATF3	ZNF335				ZNF398	KDM3A	ZXDB	ZNF511	MTA2	UBTF		EP400	NKRF	SP2
NFIA	MCM7	PAF1	ZSCAN5C			MZF1	MZF1		ERF		SAFB	ZSCAN21	ZBTB33				ZNF18	NFIA	GTF2F1	MIER3	IKZF2	THAP11		ZBTB33	ZSCAN9	DEAF1
KLF5	TFDP1	YY2	PML			ZNF501	ZNF501		KMT2B		EBF1	PHF21A	TARDBP				ZNF701	ATM	TGIF2	KAT7	KAT8	FOXP1		JUN	SIN3B	TRIM25
ATM	RAD21	ZNF644	ZBTB2			RUNX3	RUNX3		MXD4		KAT7	KDM1A	PRDM10				ZNF366	ARID4B	XRCC5	DRAP1	MZF1	SOX5		HLF	SAFB	SAFB
GABPB1	ZNF501	PPARG	PHB2			ZNF592	ZNF592		CHD4		MYNN	SP3	ZKSCAN1				ZFP3	HNF1A	KDM4B	DMAP1	IRF3	HHEX		ZBTB6	ETV4	SKIL
ARID1B	CREB1	ZNF324	MTA1			KMT2B	KMT2B		KLF11		RBM22	ZBTB8A	KLF9				NFIL3	PPARG	PATZ1	BCL6	ZKSCAN8	HMG20A		ZNF184	DRAP1	TAL1
ARID4B	ELF4	MLLT1	MGA			TAF9B	TAF9B		MIER3		ZKSCAN1	MIXL1	DEK				ZNF324	MIXL1	OSR2	ZNF205	SOX6	HMG20B		KLF9	THRB	KAT7
NFIL3	MTA3	MLX	UBTF			NFATC3	NFATC3		ZSCAN9		ZNF658	ZSCAN4	MXD4				ZSCAN21	SP5	KAT8	FOXP1	ZBTB6	RBPJ		SP2	ZNF205	RBM22
SMARCE1	PHF8	ZBTB8A	KLF6			ZNF132	ZNF132		DMAP1		CCAR2	NFXL1	HCFC1				ZBTB8A	TGIF2	HDGF	HHEX	YBX1	MIER2		KLF16	ZBTB48	DMAP1
GMEB1	ATF7	MIXL1	KLF9			ZBTB33	ZBTB33		TBP		DMAP1	ZNF660	SAP130				MIXL1	XRCC5	TRIM24	GATAD1	EED	NFIA		BCL11B	MYRF	ZFP91
E2F4	GATAD2B	DACH1	BRCA1			DMAP1	DMAP1		BCL6		THRB	GATAD2B	HOMEZ				PATZ1	KAT8	LARP7	HMG20B	NFRKB	NFIL3		FOXM1	SUZ12	CBX1
PAF1	RUNX3	ZXDB	KMT2B			THRB	THRB		HMG20A		CEBPZ	DACH1	ZNF511				ZNF558	ELF1	CTBP1	RBPJ	TFDP1	SOX13		ZNF548	TBX3	SUPT5H
HNF1A	CBX3	ZNF280D	ZKSCAN1			ZNF318	ZNF318		GATAD1		ATF1	ZXDB	ZFP64				ESRRA	ZKSCAN8	GLIS2	GATA4	ZHX2	MIXL1		ZNF626	HMG20A	ZSCAN23
PPARG	POLR2B	SP5	NUFIP1			HDAC2	HDAC2		RBPJ		CBX1	ARID2	RFX5				ZBTB17	ETS1	ZBTB17	ZNF652	TCF12	NFKBIZ		REPIN1	GATAD1	IRF9
ZNF324	KLF8	ATF1	HLTF			NCOA1	NCOA1		ZNF792		MBD1	SP5	IRF4				SOX13	RERE	SOX6	ARID3A	ELF4	TCF7		ZNF37A	MXD3	EP400
MLX	RFX3	FUS	SUPT5H			HMG20A	HMG20A		ZNF48		FOXP1	KHSRP	THAP11				ZBTB6	ZBTB25	ZNF143	NFIA	PHF8	KAT8		ATF1	HBP1	ZNF189
TBL1XR1	RELB	LEF1	ZNF205			JUN	JUN		IKZF5		PTBP1	EGR2	KAT7				ZNF501	TFE3	ZBTB6	PPARG	ZSCAN29	RCOR2		EHMT2	RBPJ	NRF1
SOX13	FOXA3	ZEB2	GTF2F1			ZNF48	ZNF48		NFIA		ZHX1	FUS	USF2				FOXA3	SKI	EED	SOX13	CBX3	RERE		NCOA1	ZNF792	ZEB2
ZSCAN21	LEF1	DNMT1	HHEX			ZNF768	ZNF768		ARID4B		IRF9	SNRNP70	DRAP1				TSHZ1	MBD2	NFRKB	SP5	RUNX3	TFE3		DIDO1	NFYC	ZC3H8
PHF21A	ZBTB20	GTF2F1	SIN3B			GMEB1	GMEB1		HNF1A		ZNF624	DNMT1	DMAP1				RERE	TAF9B	TFDP1	HNRNPL	EP300	ZGPAT		HDGF	STAT1	MXD3
SP3	RCOR2	ZNF629	ZFX			MLX	MLX		SP5		HHEX	GATAD2A	TEAD3				ZSCAN5C	NR3C1	ZNF501	NFKBIZ	ZSCAN18	CBFB		TEAD4	ZBTB40	TAF7
MIXL1	CC2D1A	NFKBIZ	JUN			ZNF384	ZNF384		KAT8		GATAD1	TGIF2	ZNF205				OVOL3	HLTF	MTA3	IRF2	JUND	STAT5A		ZNF133	RFX1	ZBTB21
DACH1	BCOR	ZNF692	KLF1			NFKBIZ	NFKBIZ		IRF2		MXD3	ZNF629	MYC				TEAD1	RLF	PHF8	ZKSCAN8	POLR2B	ZFP36		HDAC1	RXRB	RLF
ZNF280D	USF1	ZNF687	MLX			ZNF266	ZNF266		ZKSCAN8		HBP1	NFKBIZ	MAX				ZNF335	GABPB1	SREBF1	HNF4G	TCF7	ZBED1		GABPB1	KDM3A	ZMYM3
GATAD2A	ZNF777	PATZ1	MBD1			TRIM24	TRIM24		LARP7		FOXK2	ZNF692	KDM1A				WT1	GMEB1	ZKSCAN1	RFX3	ETV6	ZFP64		NCOR1	BCL6B	CSDE1
HNRNPL	RERE	KAT8	EGR2			GLIS2	GLIS2		IRF9		ZNF792	U2AF2	STAT5A				MYC	TBL1XR1	POLR2B	ZBTB20	RELB	TBX3		CBFA2T3	CREB1	ZFX
TGIF2	AHR	TRIM24	SMARCC2			MEF2D	MEF2D		DIDO1		ZNF48	KDM4B	PAX5				ZNF207	DACH1	KLF8	RCOR2	TRIM28	ZNF792		MTA1	MLX	KLF1
XRCC5	ZBTB11	IRF2	ETS1			RBFOX2	RBFOX2		CAVIN1		FOXA1	PATZ1	HNF4A				RB1	KHSRP	ZBED1	GABPA	FOXA3	IKZF5		TFE3	MIXL1	SP7
NFKBIZ	RBFOX2	CTBP1	PHF8			BRD9	BRD9		TAF7		SIN3B	CDC5L	GATAD1				NKRF	MTA1	LEF1	ZBTB25	LEF1	ELF3		ZNF488	ZXDB	L3MBTL2
DDX20	AFF1	IRF3	POLR2B			ZNF398	ZNF398		TEAD2		HNRNPL	CHD2	MXD3				HNF4G	HES1	ZBTB20	TFE3	REPIN1	HNF1A		CBLL2	NFKBIZ	HDAC1
CBFA2T2	NR2C1	ZKSCAN8	RFXANK			ZNF548	ZNF548		KLF16		MIER2	OSR2	HBP1				ZNF274	NCOA6	BCOR	ZGPAT	RFXANK	MLX		ZBTB12	KAT8	KLF5
TCF7	CBFA2T3	GLIS2	ZBTB25			ZBTB11	ZBTB11		ZNF354B		ZNF3	ZNF512	MTA3				NRF1	ZNF558	ZSCAN29	SKI	CC2D1A	ZNF7		ZBTB10	ZBTB17	GABPB1
PATZ1	NR2F2	SOX6	SMARCA5			KLF17	KLF17		ZNF740		STAT1	IKZF2	MIER2				ZC3H11A	ZKSCAN1	AHR	ERF	BCOR	IRF2		ZNF148	ZNF501	NFRKB
ZNF512	ZBTB25	ETS1	ZFHX2			ZNF10	ZNF10		GTF2A2		NFE2L2	ZNF7	STAT1				GABPB1	ZBTB20	ZBTB11	ZBTB5	GTF2A2	HNF4G		MBD2	ELF4	ZNF561
RNF2	TFE3	TFDP1	KLF17			CHD1	CHD1		HMBOX1		RBM39	KAT8	LCORL				HOMEZ	ZNF174	AFF1	NR3C1	ZNF302	STAT1		HES1	KLF8	GMEB1
ZNF7	ZNF423	CHAMP1	ZBTB10			ZSCAN16	ZSCAN16		ZNF398		TCF7	TRIM24	ZNF652				ZNF511	ZNF37A	NR2F2	EHMT2	AHR	KLF5		ZNF513	ZBTB20	E2F4
KAT8	BRD9	ZNF501	DEK			ZNF223	ZNF223		ZSCAN29		GATA4	ZNF558	IKZF5				MIER3	KLF17	BRD9	NCOA6	ZBTB11	ZSCAN29		TOE1	NFXL1	NCOA6
TRIM24	ZFHX2	PHF8	MAZ			KLF7	KLF7		RBAK		ZNF350	MZF1	ELF3				THAP11	ZNF600	SMARCA5	MLLT1	NR2F2	TAF9B		KLF1	AHR	ZNF324
LARP7	ZSCAN5C	MTA3	ZNF341			CHD4	CHD4		ZBTB21		ZFP36	PRDM10	ZNF580				ETV4	STAT3	PML	DDX20	ZBTB25	SKIL		ZBTB7A	PRDM1	SP3
IRF2	ZGPAT	BACH1	ZNF639			SIX4	SIX4		SP7		ZNF26	E2F8	KDM3A				MBD1	USF2	PBX2	HDGF	BRD9	TAL1		ZNF324		GTF2F1
ZBTB26	PML	U2AF1	SMAD5			SP2	SP2		ZNF561		KLF1	BHLHE40	NFIA				FOXP1	ZBTB48	ZNF444	ZNF740	ZGPAT	IRF9		ZNF280D		CBFA2T2
IRF3	SKI	CBX3	ZNF610			ZBTB7B	ZBTB7B		MZF1		ZNF548	ZKSCAN8	POU5F1				GATAD1	PAX5	SREBF2	FEZF1	PML	FOXM1		MYNN		MTA1
ZKSCAN8	ZBTB2	ZSCAN18	SP2			MLLT1	MLLT1		ZBTB6		ZNF580	GLIS2	ARID4B				RXRB	ZFP37	BCLAF1	TOE1	SKI	ZC3H8		GLI4		ZHX2
GLIS2	OVOL3	KLF8	MIER3			ETV4	ETV4		ZSCAN5C		GATA2	ZBTB17	NFIL3				KDM3A	ZFP69B	MIER1	ZNF398	ZBTB2	DIDO1		CBX8		PATZ1
SOX6	TEAD1	TRIM28	NKRF			GLI4	GLI4		WT1		KLF5	ATF7	ZC3H11A				ARID4B	ZNF350	E2F1	ZNF366	BCLAF1	JUN		CBX2		GLIS2
NFRKB	EMSY	ZBTB20	NR3C1			ZNF205	ZNF205		KLF17		ATM	SOX6	CHD1				MLX	ZSCAN21	ERF	SUZ12	CBX5	YBX1		HDAC2		ZNF512B
MCM7	HNRNPUL1	RFXANK	GLI4			CBX2	CBX2		ZNF610		TEAD2	RNF2	ZNF175				RCOR2	ZNF692		OSR2	TEAD1	BRCA1		ZNF701		ZNF740
TFDP1	SCRT2	RCOR2	ASH2L			ZNF547	ZNF547		BCL6B		NKRF	ZNF579	GATAD2A				GABPA	PATZ1		ZBTB44	PHB2	TRIM25		ZFX		PHF8
ZNF501	GMEB2	BCOR	CBX1			HMG20B	HMG20B		COPS2		CUX1	SOX13	NFKBIZ				ZGPAT	ELF4		KLF17	EMSY	MYNN		GLIS2		ZSCAN29
ELF4	ZNF335	ELK1	KDM5A			ZHX1	ZHX1		TSHZ1		POU5F1	ZBTB6	IRF2				ERF	REPIN1		ZNF600	ZNF444	TAF7		ZSCAN18		CBX3
MTA3	MIER1	ZNF138	BCL11B			ZNF18	ZNF18		ZNF644		ZNF202	EED	IRF3				MBD2	ZNF10		RCOR1	SREBF2	ZNF335		ZNF777		POLR2B
PHF8	E2F1	RERE	TAF1			GATA4	GATA4		MIXL1		BCL6B	MCM7	RCOR2				FOXM1	HIC1		BRCA1	GMEB2	THRA		ZBTB26		KLF8
ATF7	MGA	GTF2A2	ZNF189			ZNF133	ZNF133		GABPA		ZNF644	BCL11A	ZNF138				NFATC3	ZSCAN16		HIC1	MTA1	THRB		UBTF		RFX3
CBX3	ERF	MEF2D	ZFP37			ZNF169	ZNF169		TCF7L2		ZC3H11A	CHAMP1	ZBTB25				PPARG	KLF7		ZBTB10	MIER1	GATA3		HCFC1		BCOR
POLR2B	THRA	AHR	GATAD1			ZNF140	ZNF140		ETV4		MLX	ZNF501	TFE3				DACH1	ZNF146		ZNF639	E2F1	BCL11B		KLF6		ELK1
RFX3	WT1	ZBTB11	CAVIN1			ZSCAN26	ZSCAN26		ZNF146		HLF	YBX3	ZGPAT				AFF1	BCL11B		ZNF148	ESRRA	SCRT1		KMT2B		ZBTB5
FOXA3	UBTF	RBFOX2	MXD3			ZSCAN21	ZSCAN21		ELF3		NFRKB	EP300	TEAD1				PML	SCRT1		ZEB1	ERF	ZBTB1		SMAD5		RBFOX2
LEF1	GATA2	AFF1	HBP1			ZSCAN4	ZSCAN4		GABPB1		ZSCAN21	ELF4	ERF				PHB2	ZNF488		MCM3	UBTF	CBFA2T2		KLF11		CBFA2T3
ZBTB20	ZNF205	CBFA2T3	TAF7			EGR2	EGR2		PBX2		ZSCAN4	PHF8	UBTF				MTA1	AEBP2		SMAD5	KLF17	PATZ1		TAF9B		ZBTB2
RCOR2	ZNF644	ZBTB25	ZHX1			RBAK	RBAK		PLRG1		ZNF791	ZSCAN29	TAF9B				SKIL	ZSCAN4		MCM7	ZNF10	OSR2		SAP130		GMEB2
CC2D1A	SMC3	TFE3	NFYC			ESRRA	ESRRA		ZNF513		FUS	PRDM2	KDM4B				TEAD3	ZNF239		IRF4	BCL11A	PPP1R10		MIER3		ZNF335
BCOR	MBD1	ZGPAT	BACH1			ZNF512B	ZNF512B		HLTF		EGR2	PPP1R10	TCF7L2				ZNF205	ZNF501		ZBTB7B	HIC1	ZNF423		DEAF1		MGA
ZNF777	FOXP1	SKI	GLIS1			PPP1R10	PPP1R10		CBLL2		SNRNP70	RUNX3	HLTF				MIER2	ZNF138		NKRF	ZSCAN16	ZBTB44		GABPA		UBTF
RERE	TBX3	CBX5	SREBF1			PAX8	PAX8		ZNF785		ZNF175	CBX3	XRCC3				HCFC1	FOXA1		ZNF433	ZNF223	ELK1		SMARCA5		ZNF600
AHR	HHEX	PHB2	YY2			KLF8	KLF8		NFATC3		GATAD2A	SREBF1	EHMT2				TEAD2	NFYC		GLI4	KLF7	ZNF341		SIN3B		RCOR1
ZBTB11	HMG20A	EMSY	SP3			RELB	RELB		GMEB1		NANOG	PAX8	MAFF				CUX1	MEF2D		ZNF843	FEZF1	RB1		DRAP1		BRCA1
RBFOX2	HBP1	SMARCA4	ZBTB8A			ZBTB20	ZBTB20		ZNF680		NFKBIZ	POLR2B	HDAC1				XRCC5	PBX2		SUPT5H	DEAF1	ZNF48		DMAP1		ZBTB10
AFF1	RBPJ	ZNF335	ZXDB			ZBTB40	ZBTB40		ZNF114		RBAK	KLF8	JUNB				ELF4	MAZ		ZSCAN23	ZNF585B	SP7		E4F1		NONO
NR2C1	TFAP4	MTA1	ZNF692			ZNF777	ZNF777		ZBTB5		SMARCC2	TCF7	L3MBTL2				BRD9	ZNF143		ZNF8	SMARCA5	SP5		ZFP91		DDX20
ZBTB25	LCORL	MIER1	ZNF687			ZNF121	ZNF121		ZNF248		ZNF221	RELB	ATF3				TFAP4	ARID2		THRAP3	ZBTB5	PBX2		ASH2L		NCOA2
TFE3	GATA4	E2F1	PATZ1			ZFHX2	ZFHX2		ZNF282		KDM4B	FOXA3	DNMT1				EGR2	RAD51		ZNF189	TCF7L2	LARP7		ZSCAN5A		E4F1
BRD9	ZNF652	ERF	LARP7			ZNF174	ZNF174		ZNF148		CBX8	TSHZ1	GTF2F1				ZNF341	TBP		ZNF2	TAL1	ZNF189		NUFIP1		ZNF318
ZGPAT	SP5		ESRRA			ZBTB26	ZBTB26		SKIL		ZNF7	LEF1	YBX3				ZBTB48	ASH2L		INSM2	ASH2L	ZXDB		CBX1		DIDO1
PML	SMARCC2		MZF1			ZNF444	ZNF444		MYNN		ZNF354B	ZBTB20	FOS				CAVIN1	SUPT5H		NCOA4	HLTF	KLF16		SUPT5H		ZNF664
SKI	ETS1		ZBTB26						ZNF18		ZNF239	REPIN1	AFF1				ZNF354B	TAF1		ZFP37	ZBTB48	PML		ZNF205		CHAMP1
ZBTB2	ZHX2		GLIS2						ZNF692		ZNF114	RFXANK	SREBF2				ZNF740	CHD1		ZBTB1	ZNF146	ZBTB5		GTF2F1		HDGF
TEAD1	U2AF1		BMI1						ZSCAN16		GFI1B	ZNF155	MGA				CBX5	SMARCC2		ARHGAP35	BCL11B	HLTF		ZNF512B		HNRNPL
EMSY	RFXANK		IKZF2						SAP130		IRF3	RCOR2	ZBTB10				NONO	GABPA		ZBTB21	SUZ12	PTBP1		NRF1		NFYC
HNRNPUL1	EP300		BCL11A						TEAD3		ZKSCAN8	CC2D1A	FEZF1				ZEB1	NFRKB		LARP7	ZSCAN23	MCM7		GATAD1		TEAD4
SCRT2	PBX2		TFDP1						HMG20B		RNF2	BCOR	ZNF521				KMT2B	HBP1		PRDM4	KDM1A	NCOA4		HBP1		E2F7
GMEB2	BCL11A		ZNF501						MIER2		ZBTB6	ZNF121	ZNF146				SMAD5	GATA4		ZFP69B	IRF9	RLF		TAF7		ZBTB7A
ZNF335	IRF4		CREB1						ZNF7		YBX1	GTF2A2	ZNF624				CHD4	ZNF7		ZNF837	HHEX	RUNX1		HNRNPH1		KLF10
MIER1	NFE2		RFX3						RCOR2		ZNF740	MEF2D	TCF7				KLF9	SIN3A		CSDE1	INSM2	KLF1		ZNF3		PHF21A
E2F1	BATF		RELB						KDM6A		PHF8	AHR	ZNF280D				SIN3B	ZNF48		PYGO2	RAD51	KHSRP		NFYC		ZBTB8A
MGA	PAX5		ZBTB20						ZFP64		U2AF1	HMBOX1	ZNF404				SMAD4	EZH2		PHF20	ZNF530	ZNF740		RLF		EGR2
THRA	JUNB		HMBOX1						MXD3		CBX3	RBFOX2	ZNF473				SUPT5H	ZFP64		ZNF701	ZNF416	PHB2		ZNF768		NFKBIZ
UBTF	FOS		GMEB2						ZNF580		RFXANK	AFF1	CREM				ZNF384	MCM7		ZNF561	CBLL2	MIER1		GATA4		ZNF692
ZNF680	EED		THRA						MLX		ZBTB40	CBFA2T3	ZNF114				HMG20B	NFIB		MCM2	ZNF792	E2F1		RXRB		U2AF2
LCORL	ETV6		MXD4						ZBTB26		GTF2A2	NR2F2	EED				ZNF792	MAX		BCL6B	ARHGAP35	XRCC5		PHF20		LEF1
HIC1	BCLAF1		ZFP64						RERE		AHR	ZBTB25	ZNF670				ZNF48	PHF21A		ZNF324	RFX1	SSRP1		NKRF		TRIM24
GATA3	TCF12		SAFB						AHR		RBFOX2	TFE3	ZNF777				HNRNPL	ZNF544		ZBTB12	AEBP2	SUPT5H		ARID4B		PRDM10
FOXP1	ZNF680		ZBTB48						ZBTB25		ZBTB25	BRD9	ZNF121				STAT1	HNRNPL		ZSCAN21	NFIB	ZNF768		NFATC3		RFXANK
BCL11B	ZNF654		TOE1						ZNF585B		TFE3	ZFHX2	ZNF37A				RLF	TRIM25		SP3	RBM39	ZFX		GMEB1		AFF1
SCRT1	ZNF121		ZNF768						ZNF518A		ZNF157	ZSCAN5C	ZNF621				GATA4	THRB		ZBTB8A	ZFP69B	ETV4		MIXL1		ZFHX2
ZNF398	ZBED1		ZNF18						ZNF280D		ZGPAT	ZGPAT	EBF1				ZNF652	ZC3H8		ZXDB	ZNF652	TEAD2		SP5		PML
ZNF558	ZIC2		PHF20						GATA3		PML	PML	PAX8				ZFX	LARP7		ZNF280D	RUNX1	KLF17		ZFP36		MIER1
MYNN	HIC1		MCM2						ZFP69B		CBX5	SKI	RARA				ZNF644	ZNF217		TSC22D4	ZNF133	FEZF1		HNRNPL		E2F1
ZNF302	OSR2		ZBTB7A						ZNF324		ZNF174	ZBTB2	BCL6				SP5	NRF1		ZNF629	ZNF701	ZNF398		TGIF2
TFAP4	ZBTB10		KLF10						PATZ1		HNRNPUL1	TEAD1	TBP				NANOG	ZFHX2		ZNF776	TEAD2	ZNF652		NFKBIZ
ZNF592	MYNN		ZNF324						ZBTB44		SREBF2	PHB2	ELF1				NFKBIZ	THRA		KDM4B	ZFP41	ZNF639		KAT8
SREBF1	BMI1		PHF21A						ZNF10		ERF	EMSY	HHEX				DDX20	ZFP91		PATZ1	ZNF366	ZNF223		LARP7
HMBOX1	PRDM1		CDC5L						ZXDB		KLF17	ZNF37A	BMI1				GLIS2	ZNF207		CDC5L	MCM2	NKRF		ZNF579
ZBTB10			ZNF579						TAF9B		ZBTB10	PRDM1	RXRB				TFDP1	RCOR1		ZNF558	ZFP3	NCOA2		ELF4
ETS1			KLF8						SUPT5H		HES1	ZBTB26	YBX1				PHF8	HCFC1		ZNF311	SMARCE1	ZNF547		PHF8
RUNX1			ZBTB11						EP400		CHD1	ZNF444	FOXA3				ZBTB20	KLF11		GFI1B	ZBTB7A	ZNF19		POLR2B
SAFB			PBX2						ARHGAP35		ZSCAN16	HNRNPUL1	RERE				AHR	DIDO1		GLIS2	ZNF169	ZNF18		CC2D1A
NR3C1			ZNF444						POLR2B		ZNF639	SCRT2	NR2F2				ZBTB11	CAVIN1		ZBTB17	YY2	ZNF280D		HMBOX1
GLI4			SCRT2						TGIF2		ZEB1	SREBF2	SKI				RBFOX2	KLF5		EED	PPARG	STAT3		RBFOX2
MBD1									MBD1		KLF7	ZNF335	NONO				SKI	TEAD2		IKZF2	ZSCAN26	INSM2		ZGPAT
ZNF205									ARID2		KMT2B	MTA1	E2F7				ZBTB26	RFXANK		BCL11A	ZNF184	CAVIN1		PML
ZZZ3									NFKBIZ		ZNF623	E2F1	HSF1				UBTF	GTF2A2		ZNF501	ATF3	KLF6		SKI
NCOA1									TFE3		TAF9B	ZBTB44	PHF21A				ZBTB10	ZBTB5		YBX3	ZSCAN4	KMT2B		ERF
CAVIN1									DRAP1		ZNF610	XRCC5	DDX20				ETS1	RUNX1		ZNF670	ZNF280D	MXD4		DNMT3B
HBP1									NFRKB		ZFP64	MGA	ZNF707				ZSCAN9	NKRF		POLR2B	SP5	KDM6A		MXD4
TOE1									CBX1		ZBTB7B	ERF	POLR2B				DRAP1	CBX2		KLF8	EGR2	KLF11		NONO
RBM39									ZNF318		ZNF513	WT1	BRD9				DMAP1	ZFP3		TSHZ1	DNMT1	MIER3		ZNF511
TEAD4									ZNF16		TRIM25	ZSCAN16	E2F1				GLI4	GLIS2		NFXL1	ZBTB49	ZSCAN9		THAP11
GATA4									ZNF23		SKIL	SSRP1	KAT8				ZSCAN5A	UBTF		ZSCAN5C	FOS	KAT7		ZKSCAN1
CSDE1									ZNF511		ZFP91	NR2C1	WT1				ZNF785	RFX5		BCLAF1	ZNF629	MYRF		MBD1
PYGO2									TAF1		SUPT5H	IRF2	CBFB				ZBTB7A	NFE2L2		PRDM1	NFKBIZ	GATAD1		KDM5A
ZFX									STAT1		ZBTB48	MXD4	ASH2L				E2F4	ZBTB12		MIER1	RBAK	NFYC		ZC3H8
ZFP3									KLF5		SUZ12	EBF1	BATF				YY2	CHD2		ETS1	CBFA2T2	GATA4		SNIP1
ZNF644									U2AF1		ZSCAN23	USF2	RBBP5				YBX1	RB1		ZFP64	CDC5L	KDM3A		MXD3
SP5									ZBTB8A		ZNF512B	FOSL2	ZBTB40				ZNF777	EBF1		PAX8	ZNF239	ARID4B		RBPJ
MTA1									ZNF473		EP400	RARA	HNRNPL					ZNF680		SNIP1	ZNF626	SMARCC2		ZNF792
KDM4B									ZNF423		FOXM1	DMAP1	EZH2					ZNF3		E2F8	YBX3	ZBTB26		ZNF48
HNF4G									ZHX2		ZNF2	ASH2L	ARHGAP35					CSDE1		RELB	ZNF707	TFDP1		ZSCAN29
ZHX2									IRF3		NCOA1	ZNF205	TOE1					ZNF354B		SIX5	RERE	ZBTB20		IKZF5
TCF12									ASH2L		DIDO1	FOXP1	COPS2					MIER1		ZNF610	MEF2D	AHR		NFIA
U2AF1									GLIS2		TAF7	KDM5A	NFIC					ZNF341		SP2	HMBOX1	RBFOX2		KLF5
RFXANK									BRCA1		ZNF488	ZHX1	NRF1					SMAD5		SIN3B	ZNF23	ZBTB25		ZNF785
NFXL1									DEK		ATF4	KAT2B	EGR1					SP2		CBFB	CBFA2T3	ERF		NFIL3
GTF2A2									ZNF223		ZSCAN29	FOXM1	PYGO2					ZNF512B		KDM5A	ZFHX2	THRAP3		E2F4
PBX2									ZHX1		ZBTB21	NCOA1	NCOA3					MXD3		ZHX1	ZNF747	HBP1		YY2
ZNF444									ZNF544		RLF	DIDO1	ATM					HSF1		SRF	ZSCAN5C	DNMT1		PHF21A
TCF7L2									RFXANK		ZFP69B	ZNF416	HNF1A					SP3		TAF7	PBX2	DNMT3B		CBFA2T2
MEF2D									NR3C1		CSDE1	HBP1	CBFA2T2					EGR2		TAF1	OVOL3	ZBTB10		KDM4B
MYRF									PPARG		PHF20	MIER2	HNF4G					DDX20		ZFP36	ZNF592	KLF7		ZKSCAN8
TBX3									ZNF791		TRIM28	ZNF518A	ZNF433					PHF8		KLF1	HES1	KLF9		SOX6
HHEX									U2AF2		ZNF561	ZNF3	KAT2B					POLR2B		KLF10	ZNF511	NR3C1		NFRKB
HMG20A									ZBTB2		ZNF785	RLF	ZFP37					ZNF777		YY2	ZBTB7B	PRDM6		TFDP1
ZNF652									DNMT3B		ZBTB7A	NFE2L2	ZNF547					ZBTB10		RB1	ZNF316	SNIP1		U2AF1
SMARCC2									MYRF		GMEB1	ELF3	ZNF514					SAFB		ELF4	NR3C1	ZNF488		CBX3
ZNF282									EHMT2		KLF10	PHF20	JUN					GLI4		ZBTB11	RBM22	ARHGAP35		RFX3
EZH2									ZNF652		YY2	ZNF548	RBAK					ZBTB1		ZZZ3	ZZZ3	ZNF3		RFXANK
ZNF202									AFF1		SP3	ZNF785	HNRNPUL1					PYGO2		RBM39	MCM7	RBM39		AHR
ZNF350									MIER1		ZBTB8A	HNF1A	GABPA					ZFX		DNMT1	SNIP1	E2F7		AFF1
KLF7									ZNF3		DACH1	PPARG	ZNF18					HNF4G		CBX5	BMI1	CSDE1		ZBTB25
NANOG									LCORL		ZXDB	ZFP36	CSDE1					ZBTB6		SSRP1	HNRNPH1	KLF10		BRD9
ZBED1									GATA4		ZNF280D	FOS	E2F4					AHR		NUFIP1	NFE2L2	NCOA6		ZBTB2
TAL1									TFDP1		ZNF692	ZHX2	FUS					ZBTB11		MBD1	STAT3	PHF21A		SREBF2
STAT5A									HIC1		MTA1	TFDP1	ZBTB49							ZNF3	PAF1	KDM4B		E2F1
NCOA2									ZNF639		PATZ1	ZNF707	NANOG							JUN	U2AF2	CDC5L		MGA
CUX1									ZNF843		LEF1	ZSCAN18	ZNF211							ZFX	OSR2	YBX3		NFIC
KHSRP									INSM2		TRIM24	ETV6	USF1							PHF8	RFX3	PAX8		ZNF207
PHB2									CSDE1		ZNF704	RFX3	THRA							EZH2	ZNF138	TSHZ1		ZFP64
YBX1									ZBTB7A		E2F8	USF1	ZIC2							ZSCAN9	TFE3	ZFP91		CBFB
ZNF521									ZEB2		ZSCAN18	ZNF777	ZNF341							EBF1	FOSL2	ZFP37		KAT7
ZNF776									ZSCAN18		POLR2B	RERE	ZNF610							PAX5	RCOR1	ZFP69B		THRB
ZNF140									NANOG		ZBTB20	ZBTB11	SP2							MIER2	ZFP36	HNRNPL		HLTF
ARID2									SRF		ZNF777	OVOL3	TRIM25							LCORL	E2F7	GLIS2		PPARG
ZNF513									CBX8		ZBTB11	UBTF	NKRF							ZNF18	ZNF175	ZBTB17		KDM1A
CBLL2									NCOA1		ZNF423	BRCA1	KLF16							TGIF2	ZNF7	PHF20		ZNF354B
ZNF133									ZFP37		BRD9	ETS1	ZSCAN23							TFDP1	USF2	SREBF2		ZNF239
TSC22D4									PHF21A		ZBTB2	SFPQ	ZNF512B							KLF9	ZNF740	ZNF511		BCOR
STAT3									ZNF558		OVOL3	RFX1	ZNF48							DNMT3B	ZNF37A	DRAP1
ESRRA									PML		EMSY	RBBP5	ZFP69B							ASH2L		DMAP1
BMI1									SREBF2		ZNF444	U2AF1	PHF20							NFATC1		MBD1
RFX1									ZEB1		E2F1	CBX5	GABPB1							BACH1		MXD3
ZNF174									ZNF2		MGA	GMEB2	ZFP3							KLF5		LCORL
ZC3H11A									RBM39		ZNF205	ATF4	ZNF687							RFXANK		TGIF2
NFE2L2									E2F4		ZNF318	ZNF664	SUZ12							RBFOX2		U2AF1
ZNF169									ZBTB12		BCL11B	NANOG	E2F8							ZBTB26		RFX3
ZNF146									SP3		EHMT2	GFI1B	TFDP1							SREBF2		RFXANK
									ZNF660		ZNF530	ZNF654	ZNF207							POLR3G		ZNF843
									CHAMP1		ZNF398	ZNF133	ZBTB26							ZNF10		ZBTB48
									ZBTB11		ZNF837	BATF	PLRG1							ZSCAN16		ZSCAN21
									UBTF		NFATC3	IRF5	FOXP1							KLF11		ZNF791
									ZSCAN5A		HSF1	EZH2	ZNF837							ZNF513		RBAK
									PTBP1		DNMT1	RUNX1	MCM3							DEAF1		ZNF501
									PYGO2		OSR2		ZBTB5							RBM22		ZNF121
									FOXM1		ZNF579		MCM5							CCAR2		ZFP3
									GFI1B		AFF1		NCOA1							PTBP1		ZBTB12
									CBX2		MIER1		SNIP1							BCL11B		U2AF2
									ZSCAN21		ZIC2		RAD51							HBP1		ZZZ3
									SMAD5		ZNF511		NCOA4							CBLL2		ZNF548
									MCM7		DDX20		TAF1							RBBP5		ZNF324
									TRIM25		GLI4		GATA2							NFYC		KLF8
									SIN3B		ZSCAN5A		MCM2							STAT1		ZNF561
									GLI4		HLTF		CDC5L							AEBP2		DEK
									KDM5A		ZNF146		AHR							KDM3A		SP2
									BCL11B		ZBTB1		ZBTB2							ZNF785		SAFB
									ZSCAN23		THRAP3		PHB2							ZBTB7A		ZSCAN5A
									ZC3H8		ZC3H8		MIER1							ZNF169		KDM5A
									SNIP1		SNIP1		ZNF701							ZSCAN26		ZSCAN23
									NCOA4		CBLL2		ZNF221							ZBTB49		ZNF2
									IRF5		LARP7		ZNF626							U2AF2		CBX2
									ZNF547		PRDM4		ZBTB6							MZF1		HNRNPH1
									ZNF416		RFX1		ZNF302							U2AF1		SIN3B
									ZNF488		ZNF18		ZNF248							ZSCAN18		E2F4
									ZNF514		E2F7		ETS1							REPIN1		PAF1
									ZNF837		PYGO2		SAFB							ZNF777		SP3
									PHF20		NCOA6		SMAD4							ZNF121		FUS
									ZNF548		ZNF140		HMG20B							RERE		MZF1
									PAF1		PHF21A		RBPJ							AHR		GFI1B
									ZNF169		CDC5L		CBLL2							ZNF423		ELF4
									YY2		ZNF558		TFAP4							ZNF747		PHF8
									ZSCAN26		YBX3		ZNF680							OVOL3		POLR2B
									ZNF404		PBX2		GLIS2							ZNF37A		GTF2A2
									KHSRP		PHB2		ZHX2							HNRNPUL1
									DNMT1		GMEB2		KLF6							MXD3
									CDC5L		ZBTB44		SIX5							ZC3H11A
									ZNF239		ASH2L		MBD2							FUS
									HNF4G		KDM5A		KDM6A							ZBTB6
									ZNF501		KAT2B		MIER3							GMEB2
									YBX3		ZNF416		DEAF1							KLF7
									ZNF707		HMG20B		FOSL2							ZSCAN5A
									CBX3		ZNF707		ETV4							HSF1
									REPIN1		RFX3		RBM22							E2F1
									ZNF155		RERE		CCAR2							ZNF350
									ZNF777		KHSRP		THRB							ZNF658
									ZNF121		ZBTB5		CEBPZ							ZNF146
									ZNF138				CBX1							MYRF
									BRD9				PTBP1							ZNF624
									OVOL3				ZHX1							TBX3
									GMEB2				SRF							ZNF416
									E2F1				NFATC1							ZNF488
									DEAF1				ZNF3							ZNF26
									THRAP3				NFYC							E2F7
									SMARCC2				RBM39							E2F4
									KDM4B				TEAD4							ZNF791
									ELF4				GATA4							ZNF473
									SAFB				ZFP36							RBAK
									NCOA6				RUNX1							ZNF704
													ZNF548							ZNF23
													ZBED1
													ZNF202
													MLX
													ZNF791
													SP5
													SNRNP70
													ZNF7
													ZNF239
													U2AF1
													RFXANK
													RBFOX2
													ZNF157
													PML
													CBX5
													ZNF488
													ZNF140
													PPARG
													ZNF423
													KLF7
													KMT2B
													GATA3
													KDM5A
													BCL11B
													CHAMP1
													ZNF274
													PBX2
													GMEB2

## Sheet: Hoja5
	Tiam2	Tfb1m	Dok5	Tmem135	Fam181b	Tenm4	Plk2	Stk32a	Dpysl3	Prex1	Fstl5	Vps45	Hist2h2be	Pde4dip	Tusc1	Fzd10	Grid2	Zc3h12c	Arhgap18	Cdh6	Fam91a1	A1bg	Pvt1	Adamts5	Csnk1g3	Chchd6	Zfat	Frecuencia
SIN3A	1	1	1	1	0	1	1	1	1	1	1	1	1	1	0	0	1	1	1	1	1	1	1	1	1	1	1	24
YY1	1	1	1	1	1	1	1	1	1	1	1	1	1	1	1	0	1	1	1	1	1	1	1	1	1	1	1	26
REST	1	1	1	1	1	1	1	1	1	1	1	1	1	1	1	1	1	1	1	1	1	1	1	1	1	1	1	27
POU5F1	1	0	0	1	0	1	1	1	1	0	1	1	0	1	1	1	1	0	1	1	1	0	1	1	1	0	0	18
TBP	1	1	1	1	1	1	1	1	1	1	1	1	1	1	1	1	1	1	1	1	1	1	1	1	1	1	1	27
JUND	1	1	1	1	1	1	1	1	1	1	1	1	1	1	1	0	1	1	1	1	1	1	1	1	1	1	1	26
BCL11A	1	1	1	1	0	1	1	1	1	1	1	1	1	1	0	0	0	1	1	0	1	1	1	1	1	1	1	22
CEBPB	1	1	1	1	1	1	1	1	1	1	1	1	1	1	1	1	1	1	1	1	1	1	1	1	1	1	1	27
TRIM22	1	1	1	1	1	1	1	1	1	1	1	1	1	1	1	1	0	1	1	0	1	1	1	1	1	1	1	25
EP300	1	1	1	1	1	1	1	1	1	1	1	1	1	1	1	1	1	1	1	1	1	1	1	1	1	1	1	27
IRF4	1	1	1	0	0	1	1	1	1	1	1	1	1	1	0	0	0	1	1	0	1	1	1	0	1	1	1	20
SMARCA5	1	1	1	1	1	1	0	0	0	1	1	1	1	1	0	1	0	1	1	1	1	1	1	1	1	1	1	22
FOSL2	1	1	1	1	1	1	1	1	0	1	1	1	1	1	0	1	1	1	1	1	1	1	1	0	1	0	1	23
NFE2	1	1	1	1	1	1	1	1	1	1	0	1	1	1	0	0	0	1	1	1	1	0	1	1	1	1	1	22
SPI1	1	1	1	1	1	1	1	1	1	1	1	1	1	1	0	0	0	1	1	1	1	1	1	1	1	1	1	24
BATF	1	1	1	0	1	1	1	1	1	1	1	1	1	1	0	0	0	1	1	1	1	1	1	0	1	1	1	22
ELF1	1	1	1	1	0	1	1	1	0	1	1	1	1	1	1	1	0	1	1	1	1	1	1	0	1	1	1	23
PAX5	1	1	1	0	0	1	0	0	1	1	1	1	1	1	0	0	0	1	1	1	1	1	1	0	1	1	1	19
POLR2A	1	1	1	1	1	1	1	1	1	1	1	1	1	1	1	1	1	1	1	1	1	1	1	1	1	1	1	27
IKZF1	1	1	1	1	1	1	1	1	1	1	1	1	1	1	0	0	1	1	1	1	1	1	1	1	1	1	1	25
NFATC1	1	1	0	0	0	1	0	0	1	1	1	1	1	1	0	0	0	1	1	0	1	0	1	0	1	1	1	16
ATF2	1	1	1	1	1	1	1	1	1	1	1	1	1	1	0	0	0	1	1	1	1	1	1	1	1	1	1	24
JUNB	1	1	0	0	1	1	1	1	1	1	1	1	1	1	0	0	0	1	1	0	1	0	1	0	1	1	1	19
BACH1	1	1	1	1	0	1	1	1	1	1	1	1	1	1	0	1	1	1	1	0	1	1	1	1	1	1	1	24
ARID3A	1	1	1	1	1	1	1	1	1	1	1	1	1	1	0	0	1	1	1	1	1	1	1	1	1	1	1	25
PKNOX1	1	1	1	1	1	1	1	1	1	1	1	1	1	1	0	1	1	1	1	1	1	1	1	1	1	1	1	26
JUN	1	1	1	1	0	0	1	1	1	1	1	1	1	1	0	0	1	1	1	1	1	0	1	1	1	0	1	21
NKRF	1	1	1	1	0	0	0	0	0	1	1	1	1	1	0	0	0	1	1	1	1	1	1	1	1	1	1	19
CREB1	1	1	1	1	1	1	1	1	1	1	1	1	1	1	0	1	1	1	1	1	1	1	1	0	1	1	1	25
TARDBP	1	1	1	1	1	1	1	1	1	1	1	1	1	1	0	0	0	1	1	0	1	1	1	1	1	1	1	23
FOS	1	1	1	1	1	1	1	1	1	1	1	1	1	1	1	1	1	1	1	1	1	1	1	1	1	1	1	27
RAD51	1	1	0	1	1	1	1	1	1	1	1	1	1	1	0	1	0	1	1	1	1	1	1	0	1	1	1	23
ZNF687	1	1	1	1	0	1	1	1	1	1	1	1	1	1	0	0	0	1	1	1	1	1	1	1	1	1	1	23
CREM	1	1	1	1	1	1	1	1	1	1	1	1	1	1	0	1	1	1	1	1	1	1	1	1	1	1	1	26
MTA2	1	1	1	1	1	1	1	1	1	1	1	1	1	1	1	0	0	1	1	1	1	1	1	0	1	1	1	24
IKZF2	1	1	1	1	0	1	1	1	1	1	1	1	1	1	0	0	0	1	1	1	1	1	1	0	1	1	1	22
EED	1	1	0	0	0	1	0	0	0	1	1	1	1	1	0	0	0	1	1	1	1	1	1	0	1	1	1	17
DPF2	1	1	1	1	1	1	1	1	1	1	1	1	1	1	1	1	1	1	1	1	1	1	1	1	1	1	1	27
RUNX3	1	1	1	1	1	1	1	1	1	1	1	1	1	1	0	0	0	1	1	1	1	1	1	0	1	1	1	23
NBN	1	1	1	1	1	1	0	0	1	1	1	1	1	1	0	0	0	1	1	1	1	1	1	0	1	1	1	21
ETV6	1	1	1	0	0	1	0	0	0	1	1	1	1	1	0	0	0	1	1	0	1	1	1	0	1	1	1	17
RELB	1	1	1	1	0	1	1	1	1	1	1	1	1	1	0	0	1	1	1	1	1	1	1	0	1	1	1	23
GATAD2B	1	1	1	1	1	1	1	1	1	1	1	1	1	1	0	0	1	1	1	1	1	1	1	1	1	1	1	25
BCLAF1	1	1	1	0	0	1	0	0	0	1	1	1	1	1	0	0	0	1	1	1	1	1	1	1	1	1	1	19
ZNF316	1	1	0	1	1	1	1	1	0	1	0	1	1	1	0	0	0	1	1	1	1	1	1	0	1	1	1	20
RBM22	1	1	1	1	0	0	0	0	0	1	0	1	1	1	0	0	0	0	1	0	1	1	1	0	0	0	1	13
GATA2	1	1	0	1	1	1	1	1	1	1	0	1	0	1	0	0	0	1	0	0	1	0	1	1	1	1	1	18
ZNF660	1	1	0	1	1	1	1	1	1	1	0	1	1	1	1	0	0	1	1	1	1	1	1	1	1	0	1	22
MAFK	1	1	1	1	1	1	1	1	1	1	1	1	1	1	1	0	1	1	1	1	1	0	1	0	1	1	1	24
KDM1A	1	1	1	1	1	1	1	1	1	1	1	1	1	1	0	1	1	1	1	0	1	1	1	1	1	1	1	25
RFX5	1	1	1	1	1	1	1	1	1	1	0	1	1	1	0	1	0	1	1	1	1	1	1	1	1	1	1	24
CHD2	1	1	1	1	1	1	0	0	1	1	0	1	1	1	1	0	1	1	1	1	1	1	1	1	1	1	1	23
CBFA2T3	1	1	1	1	1	1	1	1	1	1	0	1	1	1	0	0	0	1	1	1	1	1	1	0	1	1	1	22
CTCF	1	1	1	1	1	1	1	1	1	1	1	1	1	1	1	1	1	1	1	1	1	1	1	1	1	1	1	27
ZNF654	1	1	1	1	1	1	1	1	1	1	0	1	1	1	1	1	1	1	1	0	1	0	1	1	1	1	1	24
RAD21	1	1	1	1	1	1	1	1	1	1	1	1	1	1	1	1	1	1	1	1	1	1	1	1	1	1	1	27
SMC3	1	1	1	1	1	1	1	1	1	1	0	1	1	1	1	1	1	1	1	1	1	0	1	1	1	1	1	25
BHLHE40	1	1	1	1	0	1	1	1	1	1	1	1	1	1	0	0	0	1	1	1	1	1	1	1	1	1	1	23
RBPJ	1	1	1	1	0	0	1	1	0	1	0	1	1	1	0	0	0	0	1	0	1	1	1	0	1	1	1	17
ZNF48	1	1	1	1	0	0	1	1	0	1	0	1	1	1	0	0	0	1	1	0	1	1	1	1	1	1	1	19
ZNF143	1	1	1	1	1	1	1	1	1	1	1	1	1	1	1	1	0	1	1	1	1	1	1	1	1	1	1	26
USF1	1	1	1	1	1	1	1	1	1	1	1	1	1	1	0	1	1	1	1	1	1	0	1	1	1	1	1	25
ZNF121	1	1	0	0	0	0	1	1	0	1	0	1	1	1	0	0	0	1	0	0	1	1	1	0	1	0	0	13
MLLT1	1	1	1	1	0	1	1	1	1	1	1	1	1	1	0	0	0	1	1	1	1	1	1	0	1	1	1	22
ERF	1	1	1	1	0	0	1	1	0	1	0	1	1	1	0	0	1	1	1	1	1	1	1	0	1	1	1	20
SAP130	1	1	1	1	0	0	1	1	0	1	1	1	1	1	0	0	1	1	1	1	1	1	1	1	1	1	1	22
ATF3	1	1	1	1	1	1	1	1	0	1	0	1	1	1	0	0	1	1	1	1	1	1	1	1	1	1	1	23
EGR2	1	1	1	1	0	1	1	1	1	1	0	1	1	1	1	1	0	1	1	1	1	1	1	1	1	1	1	24
ZFHX2	1	1	1	1	0	1	1	1	1	1	0	1	1	1	1	1	0	1	1	1	1	1	1	1	1	1	1	24
FOXA2	1	1	1	1	1	1	1	1	1	1	1	1	1	1	0	0	1	1	1	1	1	0	1	1	1	1	1	24
CEBPA	1	1	1	1	1	1	1	1	0	1	1	1	1	1	0	0	1	1	1	1	1	1	1	0	1	1	1	23
HNF4A	1	1	1	1	1	1	1	1	1	1	1	1	1	1	1	1	1	1	1	1	1	1	1	1	1	0	1	26
CEBPG	1	1	1	1	1	1	1	1	1	1	0	1	1	1	0	0	1	1	1	1	1	1	1	1	1	1	1	24
HLF	1	1	1	1	1	1	1	1	0	1	0	1	1	1	0	0	1	1	1	1	1	1	1	1	1	0	1	22
ZNF384	1	1	1	1	1	1	1	1	1	1	1	1	1	1	0	1	1	1	1	1	1	1	1	1	1	1	1	26
SP1	1	1	1	1	1	1	1	1	1	1	1	1	1	1	1	1	1	1	1	1	1	1	1	1	1	1	1	27
ZNF580	1	1	1	1	1	0	1	1	1	1	0	1	1	1	0	0	0	1	1	1	1	1	1	0	1	0	1	20
KLF17	1	0	1	1	1	1	1	1	1	1	0	1	1	1	0	0	0	1	1	0	1	1	1	1	1	0	0	19
ZNF184	1	0	0	1	0	0	1	1	0	1	0	1	1	1	0	0	0	1	1	0	1	1	1	1	1	1	0	16
ZIC2	1	1	1	1	0	1	1	1	1	1	0	1	1	1	1	0	0	1	1	1	1	1	1	1	1	1	1	23
ZNF600	1	1	0	1	0	1	1	1	1	1	0	1	1	1	1	0	0	1	1	1	1	1	1	1	1	1	1	22
ZNF341	1	1	0	1	0	1	1	1	1	1	0	1	1	1	0	0	1	1	1	1	1	1	1	1	1	1	1	22
ZNF639	1	1	1	1	0	1	1	1	0	1	0	1	1	1	0	0	0	1	1	0	1	1	1	1	1	0	0	18
ZEB1	1	0	1	0	0	0	1	1	1	1	0	1	1	1	0	0	0	1	1	1	1	1	1	1	1	0	0	17
FEZF1	1	1	0	1	0	0	1	1	1	1	0	1	1	1	0	0	0	1	1	0	1	1	1	1	1	0	1	18
MAFF	1	1	1	1	1	1	1	1	1	1	1	1	1	1	1	1	1	1	1	1	1	0	1	1	1	1	1	26
ZNF843	1	1	0	1	0	1	1	1	1	1	0	1	1	1	0	0	0	1	1	0	1	1	1	1	1	0	0	18
PRDM6	1	1	0	1	1	0	1	1	1	1	0	1	1	1	0	0	0	1	1	0	1	0	1	1	1	1	0	18
ZSCAN23	1	0	1	0	0	0	0	0	1	1	0	1	1	1	0	0	0	1	0	0	1	1	1	1	1	0	1	14
ZNF24	1	1	1	1	1	1	1	1	1	1	1	1	1	1	0	0	0	1	1	1	1	1	1	1	1	1	1	24
MYC	1	1	1	1	1	1	0	0	1	1	1	1	1	1	0	0	0	1	1	1	1	1	1	1	1	1	1	22
ZNF189	1	1	1	1	0	1	1	1	1	1	0	1	1	1	0	0	1	1	1	1	1	1	1	1	1	0	1	22
INSM2	1	1	1	1	0	1	1	1	0	1	0	1	1	1	0	0	0	1	1	0	1	1	1	1	1	0	0	18
ZNF362	1	0	0	1	1	1	1	1	1	1	0	1	1	1	0	1	0	1	1	1	1	1	1	1	1	0	1	21
GLIS1	1	1	1	1	1	1	1	1	1	1	0	1	1	1	1	0	1	1	1	1	1	1	1	1	1	1	1	25
PRDM4	1	1	1	1	0	1	1	1	1	1	0	1	1	1	0	0	0	1	1	0	1	1	1	1	1	0	0	19
ZNF18	1	1	0	1	0	1	1	1	1	1	0	1	0	1	0	0	0	1	1	0	1	1	1	1	1	1	0	18
ZFP69B	1	1	1	1	1	1	1	1	1	1	0	1	1	1	0	0	1	1	1	1	1	1	1	1	1	1	1	24
SP7	1	1	1	1	0	1	1	1	1	1	0	1	1	1	0	0	0	1	1	1	1	1	1	1	1	0	1	21
TRIM28	1	1	1	1	0	1	1	1	0	1	1	1	1	1	0	1	1	1	1	1	1	1	1	1	1	0	1	23
ZNF366	1	1	1	1	1	1	1	1	1	1	0	1	1	1	0	0	0	1	1	1	1	1	1	1	1	0	0	21
ZNF561	1	1	0	1	0	1	1	1	1	1	0	1	1	1	1	0	0	1	1	1	1	1	1	1	1	0	1	21
BCL6B	1	0	0	0	0	1	1	1	0	1	0	1	1	1	0	0	0	1	1	0	1	0	0	0	1	1	0	13
L3MBTL2	1	1	1	1	1	1	1	1	1	1	0	1	1	1	1	1	1	1	1	1	1	1	1	1	1	1	1	26
KLF10	1	1	1	1	0	1	1	1	1	1	0	1	1	1	0	0	0	1	1	1	1	1	1	1	1	0	1	21
YY2	1	1	1	1	0	0	0	0	0	1	0	1	1	1	0	0	0	1	0	0	1	1	0	0	1	0	0	12
CTBP1	1	1	1	1	1	1	1	1	0	1	1	1	1	1	1	1	1	1	1	1	1	1	1	0	1	1	1	25
ZBTB12	1	1	0	0	0	1	1	1	1	1	0	0	1	1	0	0	0	1	1	0	1	1	1	1	1	0	0	16
ZBTB8A	1	1	1	1	0	1	1	1	1	1	0	1	1	1	1	0	0	1	1	1	1	1	1	1	1	1	1	23
ZSCAN4	1	0	0	1	0	1	1	1	1	1	0	1	1	1	0	0	0	1	1	0	1	1	1	1	1	1	1	19
ZXDB	1	1	1	1	1	1	1	1	1	1	0	1	1	1	0	0	0	1	1	1	1	1	1	1	1	1	1	23
ZEB2	1	1	1	1	1	1	1	1	1	1	0	1	1	1	1	0	0	1	1	0	1	1	1	1	1	1	1	23
ZNF629	1	0	1	1	0	1	1	1	1	1	0	1	1	1	0	0	0	1	1	0	1	1	1	1	1	0	1	19
ZNF692	1	1	1	1	1	1	1	1	1	1	0	1	1	1	0	0	1	1	1	1	1	1	1	1	1	1	1	24
FOXA1	1	1	1	1	0	1	1	1	1	1	1	1	1	1	1	1	1	1	1	1	1	1	1	0	1	1	1	25
OSR2	1	1	0	1	0	1	1	1	1	1	0	1	1	1	0	0	0	1	1	1	1	1	1	1	1	0	1	20
MZF1	1	1	0	1	0	1	1	1	1	1	0	1	1	1	0	0	0	1	1	0	1	1	1	1	1	0	0	18
GFI1B	1	1	0	0	0	0	1	1	1	1	0	1	1	1	0	0	0	1	1	0	1	0	1	1	1	0	0	15
PRDM10	1	1	1	1	1	1	1	1	1	1	0	1	1	1	0	0	0	1	1	1	1	1	1	1	1	1	1	23
ZBTB17	1	1	1	1	1	1	1	1	1	1	1	1	1	1	0	0	1	1	1	1	1	1	1	1	1	1	0	24
KLF8	1	1	1	1	0	1	1	1	1	1	0	1	1	1	1	0	0	1	1	1	1	1	1	1	1	1	1	23
TSHZ1	1	0	0	0	0	0	1	1	1	1	0	1	1	1	0	0	0	1	1	0	1	0	1	1	1	0	0	14
NR2F2	1	1	0	1	1	1	1	1	1	1	0	1	1	1	1	0	0	1	1	1	1	1	1	0	1	1	1	22
ZNF423	1	1	0	0	0	1	0	0	1	1	0	1	0	1	1	0	0	0	0	0	1	1	1	1	1	0	0	13
ZSCAN5C	1	1	0	1	0	1	1	1	1	1	0	1	1	1	0	0	0	1	1	0	1	1	0	1	1	0	0	17
OVOL3	1	1	0	0	0	1	0	0	0	1	0	1	1	1	0	0	0	1	1	0	1	1	1	0	1	0	0	13
PRDM1	1	1	0	1	1	1	1	1	1	1	1	1	1	1	0	0	1	1	1	1	1	0	1	1	1	1	1	23
ZBTB44	1	0	0	1	0	1	1	1	1	1	0	1	1	1	1	0	0	1	1	0	1	0	1	1	1	0	0	17
WT1	1	1	0	1	0	0	1	1	1	1	0	1	1	1	0	0	1	1	1	0	1	0	1	1	1	0	1	18
KLF6	1	1	1	1	0	0	1	1	0	1	0	1	1	1	0	0	0	1	1	1	1	0	1	0	1	1	1	18
NCOR1	1	1	1	1	1	1	1	1	0	1	0	1	1	1	0	0	1	1	1	1	1	1	1	0	1	1	1	22
RCOR1	1	1	1	1	0	0	1	1	0	1	0	1	1	1	0	0	0	1	1	1	1	1	1	0	1	1	1	19
ZNF10	1	1	0	1	0	1	1	1	1	1	0	1	1	1	0	0	0	1	1	1	1	1	0	1	1	0	1	19
DNMT3B	1	1	0	0	0	0	1	1	0	1	0	1	0	1	0	0	1	0	1	0	1	1	1	0	1	0	1	14
NFIC	1	1	1	1	1	1	1	1	1	1	0	1	1	1	0	0	0	1	1	1	1	1	1	1	1	1	1	23
ZNF207	1	1	1	0	1	0	0	0	0	1	0	1	1	1	0	0	0	1	1	0	1	1	1	1	1	0	1	16
BRCA1	1	1	1	1	0	0	1	1	0	1	0	1	1	1	1	1	0	1	0	0	1	1	1	0	1	1	1	19
MAZ	1	1	1	1	0	1	1	1	0	1	1	1	1	1	1	1	0	1	1	1	1	1	1	1	1	1	1	24
MBD2	1	1	1	1	1	1	1	1	0	1	0	1	1	1	0	1	0	1	1	1	1	1	1	0	1	1	1	22
NONO	1	1	1	1	1	1	0	0	0	1	0	1	1	1	0	0	0	1	0	0	1	1	1	0	1	0	1	16
ELK1	1	1	1	0	0	0	0	0	0	1	0	1	1	1	1	0	0	1	0	1	1	1	1	0	1	1	1	16
HES1	1	1	0	1	1	0	0	0	0	1	0	1	1	0	0	0	0	0	1	0	1	1	1	0	1	1	1	14
MNT	1	1	1	1	1	1	1	1	0	1	1	1	1	1	1	1	0	1	1	1	1	1	1	1	1	1	1	25
CHD1	1	1	1	0	0	0	1	1	0	1	0	1	1	1	0	0	0	1	1	0	1	1	1	1	1	1	1	18
ZMYM3	1	1	1	1	1	0	0	0	0	1	0	1	1	1	0	0	0	1	1	1	1	0	1	0	0	1	1	16
ARNT	1	1	1	1	1	1	1	1	1	1	1	1	1	1	1	0	1	1	1	1	1	1	1	1	1	1	1	26
SSRP1	1	1	0	1	0	0	1	1	0	1	0	1	1	1	0	0	0	0	1	0	1	1	1	0	0	0	1	14
MAX	1	1	1	1	1	1	1	1	1	1	0	1	1	1	1	1	0	1	1	1	1	1	1	1	1	1	1	25
KMT2B	1	1	1	1	0	0	1	1	0	1	0	1	1	1	0	0	0	1	1	1	1	1	1	0	1	1	1	19
MXD4	1	1	1	1	0	0	1	1	0	1	0	1	1	1	0	0	0	0	1	0	1	1	1	0	1	1	1	17
SMAD5	1	1	1	1	0	0	0	0	0	1	0	1	1	1	0	0	0	1	1	1	1	1	1	0	1	1	1	17
HCFC1	1	1	1	1	0	1	1	1	0	1	0	1	1	1	0	0	0	1	1	1	1	1	1	0	1	1	1	20
KDM6A	1	1	1	1	0	0	1	1	0	1	1	1	0	1	0	0	0	0	1	1	1	0	1	0	0	0	1	15
CHD4	1	1	1	1	0	0	1	1	0	1	0	1	0	1	0	0	0	1	1	1	1	0	1	0	0	0	1	15
ZNF623	1	1	0	0	0	0	1	1	0	1	0	1	1	1	0	0	0	1	0	0	1	1	1	1	1	1	0	15
KLF11	1	1	1	0	0	0	1	1	0	1	0	1	1	1	0	0	0	0	1	0	1	1	1	0	1	1	1	16
TAF9B	1	1	1	1	0	0	1	1	0	1	0	1	1	1	0	0	0	1	1	1	1	1	1	0	1	1	1	19
KLF9	1	1	1	1	1	1	0	0	1	1	0	1	1	1	0	0	0	1	1	1	1	1	1	1	1	1	1	21
ZNF610	1	1	1	1	0	0	1	1	0	1	0	1	1	1	0	0	0	1	1	1	1	1	1	1	1	0	1	19
HOMEZ	1	1	1	1	0	1	1	1	0	1	1	1	1	1	0	0	1	1	1	1	1	0	1	0	1	0	1	20
ZNF511	1	1	1	1	0	0	1	1	0	1	0	1	1	1	0	0	0	1	1	0	1	1	1	0	1	1	1	18
SP2	1	1	0	1	1	1	1	1	1	1	0	1	1	1	0	0	0	1	1	1	1	1	1	1	1	1	1	22
ZFP64	1	1	1	1	0	0	0	0	0	1	0	1	1	1	0	0	0	0	1	0	1	1	1	0	1	0	1	14
MIER3	1	1	1	1	0	0	1	1	0	1	0	1	1	1	0	0	0	1	1	1	1	0	1	0	1	1	1	18
NFATC3	1	1	1	1	1	0	1	1	0	1	0	1	1	1	0	0	0	1	1	1	1	1	1	0	1	0	0	18
GABPA	1	1	1	1	0	1	1	1	0	1	0	1	1	1	1	0	0	1	1	1	1	1	1	1	1	1	1	22
THAP11	1	1	1	1	0	0	1	1	0	1	1	1	1	1	0	0	1	1	1	1	1	1	1	0	1	1	1	21
ZSCAN9	1	1	1	1	0	0	1	1	0	1	0	1	1	1	0	0	0	1	1	1	1	1	1	1	0	1	1	19
SIN3B	1	1	1	1	0	0	0	0	0	1	0	1	1	1	0	0	0	1	1	1	1	1	1	0	1	1	0	16
RXRA	1	1	1	1	1	1	1	1	1	1	0	1	1	1	1	1	1	1	1	1	1	1	1	1	1	1	1	26
EBF1	1	1	1	0	0	1	0	0	1	1	1	1	1	1	1	0	0	1	1	1	1	1	1	1	1	1	1	21
SMAD4	1	1	1	1	0	0	1	1	0	1	1	1	1	1	0	0	0	1	1	1	1	1	1	1	1	1	1	21
SKIL	1	1	1	1	1	0	0	0	0	1	0	1	1	1	0	0	0	1	1	0	1	1	1	0	0	1	1	16
CBFB	1	1	1	0	0	1	0	0	1	1	1	1	1	1	0	0	0	1	1	0	1	1	1	0	1	1	1	18
ZBTB33	1	1	1	1	0	1	1	1	0	1	1	1	1	1	0	0	0	1	1	0	1	1	1	0	1	1	1	20
KAT7	1	1	1	1	0	0	1	1	0	1	0	1	1	1	0	0	0	0	1	0	1	1	1	1	1	0	1	17
USF2	1	1	1	1	1	1	1	1	0	1	1	1	1	1	0	1	0	0	1	1	1	1	1	1	1	1	1	23
RARA	1	1	1	1	1	1	1	1	0	1	1	1	1	1	0	0	1	1	1	1	1	1	1	0	1	0	1	22
ETV4	1	1	1	1	0	1	1	1	0	1	0	1	1	1	0	1	0	1	1	1	1	1	1	0	1	1	1	21
DRAP1	1	1	1	1	0	0	1	1	0	1	0	1	1	1	0	0	0	1	1	1	1	1	1	1	1	1	1	20
DMAP1	1	1	1	1	1	0	1	1	0	1	1	1	1	1	0	0	0	1	1	0	1	1	1	1	1	1	1	21
ZFP91	1	1	1	1	1	1	0	0	0	1	0	1	1	1	0	0	0	1	1	0	1	1	1	0	1	0	1	17
ASH2L	1	1	1	1	0	0	0	0	0	1	0	1	1	1	0	0	0	1	1	0	1	1	0	1	1	0	1	15
TEAD3	1	1	1	1	1	1	1	1	0	1	0	1	1	1	0	0	1	1	1	1	1	1	1	0	1	1	1	22
THRB	1	1	0	1	0	0	1	1	0	1	0	1	0	1	0	0	0	0	1	1	1	1	1	0	1	1	1	16
ZSCAN5A	1	1	1	0	1	1	0	0	0	1	0	1	1	1	0	0	0	1	0	1	1	1	1	1	1	0	0	16
CEBPZ	1	1	0	0	0	0	0	0	0	0	0	1	0	1	0	0	0	0	0	1	0	0	0	0	0	0	0	5
BCL6	1	1	1	1	0	1	1	1	0	1	0	1	1	1	0	0	1	1	1	1	1	1	1	0	1	1	1	21
CBX1	1	1	0	1	0	0	0	0	0	1	0	1	1	1	0	0	0	0	0	0	1	1	1	0	1	0	1	12
HLTF	1	1	0	1	1	0	0	0	0	1	0	1	1	1	0	0	0	0	1	0	1	1	1	0	1	0	0	13
SUPT5H	1	1	1	1	0	0	0	0	0	1	0	1	1	1	0	0	0	1	1	1	1	1	1	0	1	1	1	17
PTBP1	1	1	0	0	0	0	0	0	0	1	0	1	1	1	0	0	0	0	0	0	1	0	1	0	0	0	0	8
ZBTB48	1	1	1	1	1	1	1	1	1	1	0	1	1	1	0	0	0	1	1	0	1	1	1	1	1	1	0	21
ZBTB40	1	1	0	1	1	1	1	1	0	1	1	1	1	1	1	0	0	1	1	1	1	1	1	1	1	1	1	23
KLF16	1	1	1	1	1	1	0	0	1	1	0	1	1	1	0	0	0	1	1	0	1	1	1	1	1	1	0	19
GTF2F1	1	1	1	1	0	1	1	1	0	1	0	1	1	1	0	0	0	1	1	1	1	1	1	1	1	1	1	21
ZNF318	1	1	0	1	0	0	1	1	0	1	0	1	1	1	0	0	0	0	1	0	1	0	1	0	0	1	1	14
HDAC2	1	1	1	1	1	1	1	1	1	1	1	1	1	1	0	0	0	1	1	1	1	1	1	0	1	1	1	23
TAF1	1	1	1	1	0	1	1	1	1	1	1	1	1	1	1	1	1	1	1	1	1	1	1	1	1	1	1	26
EP400	1	1	1	1	1	0	0	0	0	1	0	1	1	1	0	0	0	1	1	1	1	1	1	0	1	1	1	18
FOXK2	1	1	1	1	1	0	1	1	0	1	1	1	1	1	0	0	0	1	1	1	1	1	1	0	1	1	1	21
THRAP3	1	1	0	0	0	0	0	0	0	1	0	1	1	1	0	0	0	1	0	0	1	0	1	0	0	0	0	9
SMARCA4	1	1	1	1	1	1	1	1	0	1	0	1	1	1	0	0	0	1	1	1	1	1	1	0	1	1	1	21
FOXM1	1	1	1	1	1	0	0	0	0	1	0	1	1	1	1	0	0	1	1	0	1	1	1	1	1	1	0	18
SOX5	1	1	1	1	0	1	1	1	0	1	1	1	1	1	0	1	1	1	1	1	1	1	1	1	1	1	1	24
NRF1	1	1	1	1	1	0	0	0	0	1	0	1	1	1	1	0	0	1	1	1	1	1	1	1	1	1	1	20
ZNF2	1	1	1	1	1	1	1	1	1	1	0	1	1	1	0	0	0	1	1	1	1	1	1	1	1	1	0	22
MAFG	1	1	0	1	1	1	1	1	0	1	0	1	1	1	0	0	0	1	1	1	1	0	1	0	1	1	1	19
ZC3H8	1	1	1	1	1	0	0	0	0	1	0	1	1	1	0	0	0	0	1	0	1	1	1	0	1	0	1	15
DIDO1	1	1	1	1	0	0	0	0	0	1	0	1	1	1	0	0	0	1	1	0	1	1	1	0	1	0	1	15
RB1	1	1	1	1	1	0	0	0	0	1	0	1	1	1	0	0	0	1	1	1	1	1	1	1	1	1	1	19
ZFP37	1	1	1	1	0	1	1	1	1	1	0	1	1	1	0	0	0	1	1	1	1	1	1	1	1	0	0	20
EGR1	1	1	1	1	0	1	1	1	1	1	1	1	1	1	1	0	0	1	1	1	1	1	1	1	1	1	1	24
ZNF664	1	1	0	1	1	0	0	0	1	1	0	1	1	1	0	0	0	1	1	0	1	1	1	1	1	0	1	17
CHAMP1	1	1	1	1	1	0	0	0	0	1	0	1	1	1	0	0	0	1	1	0	1	0	1	0	1	1	1	16
GATAD1	1	1	1	1	0	0	1	1	0	1	1	1	1	1	0	0	0	1	1	1	1	1	1	1	1	1	1	21
HDGF	1	1	0	1	1	1	0	0	0	1	0	1	1	1	0	0	0	1	1	1	1	1	1	0	1	1	1	18
MXD3	1	1	1	1	0	0	0	0	0	1	0	1	1	1	0	0	0	0	1	0	1	1	1	1	1	1	1	16
NR2F1	1	1	1	1	1	1	1	1	1	1	1	1	1	1	0	0	0	1	1	1	1	1	1	0	1	1	1	23
HMG20B	1	1	1	1	0	0	1	1	0	1	0	1	1	1	0	0	0	1	1	1	1	1	1	0	0	0	1	17
TAF7	1	1	1	1	0	0	0	0	0	1	0	1	1	1	0	0	0	0	1	0	1	1	1	0	1	0	1	14
HNRNPH1	1	1	1	0	0	0	0	0	0	1	0	0	0	0	0	0	0	0	0	0	0	1	1	0	1	0	0	7
ZNF792	1	1	1	0	0	1	1	1	0	1	0	1	1	1	0	0	1	1	1	1	1	1	1	1	1	1	1	21
MIER2	1	1	1	0	0	0	1	1	0	1	1	1	1	1	0	0	1	1	1	0	1	1	1	0	1	0	1	18
ATF4	1	1	0	1	1	1	1	1	1	1	0	1	1	1	0	0	0	1	1	1	1	0	1	0	1	1	1	20
ZNF518A	1	1	1	0	0	1	1	1	1	1	0	1	1	1	0	0	0	1	1	1	1	1	1	1	1	0	0	19
ZNF3	1	1	0	0	0	0	1	1	0	1	0	1	1	1	0	0	0	0	1	1	1	1	1	0	1	0	1	15
ZSCAN29	1	1	1	1	1	0	1	1	0	1	1	1	1	1	0	0	0	1	1	1	1	1	1	1	1	0	1	21
RBBP5	1	1	0	0	0	0	0	0	0	0	0	0	1	1	0	0	0	1	0	0	1	0	0	0	0	0	0	6
NFYC	1	1	0	1	0	0	1	1	0	1	0	1	1	1	0	0	0	0	1	1	1	1	1	0	1	1	1	17
NR2F6	1	1	1	1	1	1	1	1	0	1	1	1	1	1	0	0	1	1	1	1	1	1	1	0	1	1	1	23
RLF	1	1	1	1	0	0	0	0	0	0	0	1	1	0	0	0	0	1	1	1	1	1	1	0	1	0	1	14
RXRB	1	1	1	1	1	0	1	1	0	1	1	1	1	1	0	0	1	1	1	1	1	1	1	0	1	1	1	22
ZNF837	1	1	0	0	0	0	0	0	0	1	0	1	1	1	0	0	0	0	0	1	1	0	0	1	0	0	0	9
ATF1	1	1	1	1	1	0	1	1	0	1	0	1	1	1	0	0	0	1	1	1	1	1	1	0	1	1	1	20
ZNF217	1	1	1	1	1	1	1	1	1	1	1	1	1	1	1	1	1	1	1	1	1	1	1	0	1	1	1	26
MEIS2	1	1	0	1	1	1	1	1	1	1	0	1	1	1	0	0	0	1	1	0	1	1	1	0	1	1	1	20
IKZF5	1	1	1	1	0	0	1	1	0	1	0	1	1	1	0	0	0	0	1	0	1	1	1	0	1	1	1	17
ELF3	1	1	0	1	1	1	1	1	0	1	1	1	1	1	0	0	1	1	1	1	1	1	1	1	1	1	1	23
ZKSCAN1	1	1	1	1	1	1	1	1	0	1	0	1	1	1	1	0	0	0	1	1	1	1	1	0	1	1	1	21
KLF1	1	1	1	1	1	1	0	0	1	1	0	1	1	1	0	0	0	1	1	1	1	1	1	1	1	1	1	21
PHF20	1	1	1	1	0	0	0	0	0	1	0	1	1	1	0	0	0	0	1	1	1	1	1	0	1	0	0	14
HDAC1	1	1	1	1	1	0	1	1	0	1	0	1	1	1	0	0	0	1	1	1	1	1	1	0	1	1	1	20
KDM3A	1	1	1	1	0	0	1	1	0	1	0	1	1	1	0	0	0	1	1	1	1	1	1	0	0	1	1	18
NFIA	1	1	1	1	1	1	1	1	0	1	0	1	1	1	0	0	1	1	1	0	1	1	1	1	1	1	1	22
KLF5	1	1	1	0	0	0	0	0	0	1	0	1	1	1	0	0	0	1	1	0	1	1	1	1	1	0	1	15
ATM	1	1	0	0	0	0	0	0	0	1	1	1	0	1	0	0	0	0	1	0	0	0	0	0	0	0	0	7
GABPB1	1	1	1	1	0	0	0	0	0	1	0	1	1	1	0	0	0	1	1	1	1	1	1	0	1	1	1	17
ARID1B	1	1	0	1	1	1	1	1	0	1	0	1	1	1	0	0	0	1	1	1	1	1	1	0	1	1	1	20
ARID4B	1	1	1	1	0	0	1	1	0	1	0	1	1	1	0	0	0	1	1	1	1	1	1	1	1	1	1	20
NFIL3	1	1	1	1	0	0	1	1	0	1	1	1	1	1	0	0	1	1	1	1	1	1	1	1	1	0	1	21
SMARCE1	1	1	0	1	1	1	1	1	0	1	0	1	1	1	1	1	1	1	1	1	1	1	1	0	1	1	1	23
GMEB1	1	1	1	1	1	0	1	1	0	1	0	1	1	0	0	0	0	1	1	1	1	1	1	0	1	1	1	19
E2F4	1	1	1	0	0	0	0	0	0	1	0	1	1	1	0	0	0	1	0	1	1	0	1	0	1	0	1	13
PAF1	1	1	1	0	0	0	0	0	0	1	0	0	0	0	0	0	0	0	1	0	0	1	1	0	0	0	0	7
HNF1A	1	1	0	1	0	1	0	0	0	1	1	1	1	1	0	0	0	0	1	1	1	1	1	0	0	0	1	15
PPARG	1	1	1	1	0	0	1	1	0	1	1	1	1	1	0	0	1	1	1	1	1	1	1	0	1	0	1	20
ZNF324	1	1	1	1	0	0	1	1	1	1	0	1	1	1	0	0	0	1	1	0	1	1	1	1	1	0	1	19
MLX	1	1	1	1	0	0	1	1	0	1	1	1	1	1	0	0	0	1	1	1	1	1	1	0	0	1	1	19
TBL1XR1	1	1	1	1	1	0	0	0	1	1	0	1	1	1	0	0	0	1	1	1	1	1	1	0	1	1	1	19
SOX13	1	1	1	1	0	1	1	1	0	1	1	1	1	1	0	1	1	1	1	1	1	1	1	1	1	1	1	24
ZSCAN21	1	1	0	1	0	1	1	1	1	1	0	1	1	1	0	0	0	1	1	1	1	1	1	1	1	0	0	19
PHF21A	1	1	0	1	0	0	0	0	0	1	0	1	1	1	0	0	0	0	1	1	1	1	1	0	1	1	1	15
SP3	1	1	1	1	0	1	1	1	1	1	0	1	1	1	1	0	1	1	1	1	1	1	1	1	1	1	1	24
MIXL1	1	1	1	1	0	1	1	1	0	1	1	1	1	1	0	0	1	1	1	1	1	1	1	0	1	1	1	22
DACH1	1	1	1	1	1	1	1	1	0	1	0	1	1	1	0	0	0	1	1	0	1	0	1	1	0	1	1	19
ZNF280D	1	1	1	0	0	0	0	0	0	1	0	1	0	1	0	0	0	0	0	0	1	1	1	0	1	0	0	10
GATAD2A	1	1	1	1	1	1	1	1	0	1	1	1	1	1	0	0	1	1	1	1	1	1	1	0	1	1	1	23
HNRNPL	1	1	0	1	0	0	0	0	0	1	0	1	1	1	0	0	0	1	1	0	1	1	1	0	1	1	1	15
TGIF2	1	1	1	1	0	0	1	1	0	1	0	1	1	1	0	0	0	0	1	1	1	1	1	0	1	1	1	18
XRCC5	1	1	1	1	1	1	1	1	1	1	0	1	1	1	0	1	0	1	1	1	1	1	1	1	1	1	1	24
NFKBIZ	1	1	1	1	0	0	1	1	0	1	0	1	1	1	0	0	0	1	1	1	1	1	1	0	1	1	1	19
DDX20	1	1	1	1	1	0	0	0	0	1	0	1	1	1	0	0	0	1	1	1	1	1	1	0	0	0	1	16
CBFA2T2	1	1	0	1	1	1	1	1	0	1	0	0	0	1	0	0	0	1	1	1	1	1	1	0	1	1	1	18
TCF7	1	1	1	1	0	1	0	0	1	1	1	1	1	1	0	1	0	1	1	1	1	1	1	0	1	0	1	20
PATZ1	1	1	1	1	1	1	1	1	1	1	0	1	1	1	0	0	1	1	1	1	1	1	1	1	1	1	1	24
ZNF512	1	1	0	1	0	0	0	0	0	1	0	1	1	1	0	0	0	1	1	0	1	0	1	1	1	0	0	13
RNF2	1	1	1	1	1	1	1	1	0	1	0	1	1	1	0	0	0	1	1	1	1	1	1	1	1	1	1	22
ZNF7	1	1	0	0	0	0	0	0	0	1	0	1	1	1	0	0	0	0	1	0	1	1	1	0	0	1	1	12
KAT8	1	1	1	1	1	0	1	1	0	1	0	1	1	1	0	0	1	1	1	1	1	1	1	0	1	1	1	21
TRIM24	1	1	1	1	1	1	1	1	0	1	0	1	1	1	0	0	0	1	1	1	1	1	1	0	1	1	1	21
LARP7	1	1	1	1	1	0	0	0	0	1	0	1	1	1	0	0	0	1	1	1	1	1	1	1	1	1	1	19
IRF2	1	1	1	1	0	0	1	1	0	1	0	1	1	1	0	0	0	0	1	1	1	1	1	1	1	1	1	19
ZBTB26	1	1	1	1	1	1	1	1	1	1	0	1	1	1	1	0	1	1	1	1	1	1	1	1	1	1	1	25
IRF3	1	1	1	0	0	0	0	0	0	1	0	1	1	1	0	0	0	0	0	1	0	1	0	0	0	1	0	10
ZKSCAN8	1	1	1	1	0	0	1	1	0	1	0	1	1	1	0	0	0	0	1	1	1	1	1	0	1	0	1	17
GLIS2	1	1	1	1	1	1	1	1	1	1	1	1	1	1	1	0	1	1	1	1	1	1	1	1	1	1	1	26
SOX6	1	1	1	1	1	1	1	1	0	1	1	1	1	1	0	0	0	1	1	1	1	1	1	0	1	1	1	22
NFRKB	1	1	1	1	0	0	0	0	0	1	0	1	1	1	0	0	0	1	1	1	1	1	1	0	1	1	1	17
MCM7	1	1	0	1	1	0	0	0	0	1	0	0	1	1	0	0	0	0	1	0	1	1	1	0	0	0	0	11
TFDP1	1	1	1	1	0	0	1	1	0	1	0	1	1	1	0	0	0	1	0	1	1	1	1	1	1	1	1	19
ZNF501	1	1	1	1	0	1	1	1	1	1	0	1	1	1	0	0	0	1	1	1	1	1	1	1	1	1	0	21
ELF4	1	1	0	0	0	0	0	0	0	1	0	1	1	0	1	0	0	1	1	0	1	1	1	1	1	1	0	14
MTA3	1	1	1	1	1	1	1	1	0	1	1	1	1	1	0	0	0	1	1	1	1	1	1	0	1	1	1	22
PHF8	1	1	1	1	0	0	1	1	0	1	0	1	1	1	0	0	0	1	1	1	1	1	1	1	1	1	1	20
ATF7	1	1	1	1	1	1	1	1	1	1	1	1	1	1	0	0	0	1	1	1	1	1	1	1	1	1	1	24
CBX3	1	1	1	1	1	0	0	0	0	1	0	1	1	1	0	0	0	1	1	0	1	1	1	0	1	1	1	17
POLR2B	1	1	0	1	0	0	0	0	0	1	0	1	1	1	0	0	0	0	1	1	1	1	1	0	1	1	1	15
RFX3	1	1	0	1	0	0	1	1	0	1	0	1	1	0	0	0	0	0	0	0	1	1	1	0	1	0	1	13
FOXA3	1	1	1	1	0	1	1	1	0	1	1	1	1	1	0	0	1	1	1	1	1	1	1	1	1	1	1	23
LEF1	1	1	1	1	1	0	1	1	1	1	0	1	1	1	0	0	1	1	1	1	1	1	1	1	1	1	1	23
ZBTB20	1	1	1	1	1	1	1	1	1	1	0	1	1	1	0	0	0	1	1	1	1	1	1	1	1	1	1	23
RCOR2	1	1	1	1	0	0	1	1	0	1	0	0	1	1	0	0	1	1	1	1	1	0	1	0	0	0	1	16
CC2D1A	1	1	0	1	1	0	0	0	0	1	0	1	1	1	0	0	0	1	1	0	1	1	1	0	1	1	1	16
BCOR	1	1	1	1	1	0	0	0	0	1	0	1	1	1	0	0	0	1	1	1	1	1	1	0	1	1	1	18
ZNF777	1	1	0	0	0	0	1	1	1	1	0	1	1	1	0	0	1	1	1	0	1	1	0	1	1	0	0	16
RERE	1	1	1	1	0	0	0	0	0	1	0	1	1	1	0	1	1	1	1	1	1	1	1	0	0	0	1	17
AHR	1	1	1	1	0	0	1	1	0	1	0	1	1	1	0	0	0	1	1	1	1	1	1	0	1	1	0	18
ZBTB11	1	1	1	1	0	1	1	1	0	1	0	1	1	1	0	0	0	1	1	1	1	1	1	1	1	0	0	19
RBFOX2	1	1	1	1	0	0	1	1	0	1	0	1	1	1	0	0	0	1	1	1	1	1	1	1	1	1	1	20
AFF1	1	1	1	1	1	0	0	0	0	1	0	1	1	1	0	0	0	1	1	1	1	1	1	0	1	1	1	18
NR2C1	1	1	1	1	0	0	1	1	0	1	0	1	1	1	0	0	0	1	1	1	1	1	1	0	1	1	1	19
ZBTB25	1	1	1	1	0	0	1	1	0	1	0	1	1	1	0	0	0	0	1	1	1	1	1	0	1	0	1	17
TFE3	1	1	1	1	1	0	1	1	0	1	1	1	1	1	0	0	0	0	1	1	1	1	1	1	1	0	1	20
BRD9	1	1	0	1	1	0	1	1	0	1	0	1	1	1	0	0	0	1	1	1	1	1	1	0	1	1	0	18
ZGPAT	1	1	1	1	0	0	1	1	0	1	1	1	1	1	0	0	1	1	1	1	1	1	1	1	1	1	1	22
PML	1	1	0	1	1	1	0	0	0	1	0	1	1	1	0	0	0	1	1	1	1	1	1	0	1	1	1	18
SKI	1	1	1	1	1	0	1	1	0	1	1	1	1	1	0	0	0	1	1	1	1	1	1	1	1	1	1	22
ZBTB2	1	1	0	1	1	0	0	0	0	1	0	1	1	1	0	0	0	0	1	0	1	1	1	0	1	1	1	15
TEAD1	1	1	1	1	0	1	1	1	0	1	1	1	1	1	0	0	1	1	1	1	1	1	1	0	1	1	1	22
EMSY	1	1	1	1	1	1	1	1	0	1	0	1	1	1	0	0	0	1	1	1	1	1	1	0	1	1	1	21
HNRNPUL1	1	1	0	0	0	0	0	0	0	0	0	1	1	1	0	0	0	0	0	0	1	0	1	0	0	0	0	7
SCRT2	1	1	0	1	1	1	1	1	1	1	0	1	1	1	0	1	1	1	1	1	1	1	1	1	1	1	1	24
GMEB2	1	1	0	1	0	0	0	0	0	1	0	1	1	1	0	0	0	0	0	0	1	1	0	0	0	0	1	10
ZNF335	1	1	1	1	1	1	1	1	1	1	1	1	1	1	1	0	0	1	1	1	1	1	1	1	1	1	1	25
MIER1	1	1	1	0	0	0	0	0	0	1	0	1	0	1	0	0	0	0	1	1	1	1	1	0	0	0	1	12
E2F1	1	1	1	0	0	0	0	0	0	1	0	1	1	1	0	0	0	0	0	1	1	1	1	0	1	0	1	13
MGA	1	1	0	1	1	0	1	1	0	1	0	1	1	1	0	1	0	1	1	1	1	1	1	1	1	1	1	21
THRA	1	1	0	1	1	0	0	0	0	1	0	0	0	1	0	0	0	0	1	0	0	0	1	0	0	1	0	9
UBTF	1	1	0	1	1	0	0	0	0	1	0	1	1	1	0	0	0	1	1	1	1	1	1	0	1	1	1	17
ZNF680	1	1	0	0	0	0	1	1	0	1	0	0	0	1	0	0	0	0	1	0	0	0	1	0	1	0	1	10
LCORL	1	1	1	1	0	0	0	0	0	1	1	1	0	1	0	0	0	1	0	1	1	0	1	0	0	0	1	13
HIC1	1	1	1	1	0	1	1	1	1	1	0	1	1	1	1	0	0	1	1	1	1	1	1	1	1	0	0	21
GATA3	1	0	1	1	0	1	1	1	0	1	0	0	0	1	0	1	0	1	0	0	0	0	1	0	1	0	1	13
FOXP1	1	1	1	1	1	0	1	1	0	1	1	1	1	1	0	1	1	1	1	1	1	1	1	1	1	0	1	23
BCL11B	1	0	0	1	0	0	1	1	0	1	0	1	1	1	0	0	0	1	1	0	1	1	1	1	1	0	0	15
SCRT1	1	0	0	1	0	1	1	1	1	1	0	1	1	1	0	1	0	1	1	1	1	1	1	1	1	1	1	21
ZNF398	1	0	1	1	0	1	1	1	1	1	0	1	1	1	0	0	0	1	1	0	1	1	1	1	1	0	0	18
ZNF558	1	0	0	0	0	0	1	1	1	1	0	1	1	1	0	0	0	1	1	0	1	0	1	1	1	0	0	14
MYNN	1	1	0	1	1	1	1	1	0	1	0	1	1	1	0	0	0	1	1	1	1	1	1	0	1	1	1	20
ZNF302	1	0	0	0	0	0	0	0	0	0	0	0	0	1	0	0	0	0	0	1	0	1	0	0	0	0	0	4
TFAP4	1	1	1	1	0	0	1	1	0	1	0	1	1	1	0	1	0	1	1	1	1	1	1	1	0	1	1	20
ZNF592	1	0	0	1	1	0	1	1	1	1	1	1	1	1	0	0	0	1	1	1	1	1	1	1	1	1	1	21
SREBF1	1	0	1	1	0	0	0	0	0	1	0	1	1	1	0	1	0	0	0	1	1	1	1	0	0	1	1	14
HMBOX1	1	0	0	1	1	0	1	1	0	1	0	1	1	1	0	0	0	1	1	1	1	1	1	0	1	1	1	18
ZBTB10	1	1	1	1	0	0	0	0	1	1	0	1	1	1	0	0	0	1	1	1	1	1	1	1	1	0	1	18
ETS1	1	1	1	1	0	0	0	0	1	1	0	1	1	1	0	0	1	1	1	1	1	1	1	0	0	1	1	18
RUNX1	1	0	0	1	0	0	0	0	0	1	0	1	1	1	0	0	0	0	1	0	1	1	1	0	0	1	0	11
SAFB	1	0	1	1	0	0	0	0	0	1	0	1	0	1	0	0	0	0	1	0	0	1	1	0	0	1	1	11
NR3C1	1	0	0	1	1	0	0	0	0	1	0	0	1	0	0	0	0	0	1	0	1	1	1	0	0	0	0	9
GLI4	1	0	0	1	0	0	1	1	0	1	0	1	1	1	0	0	0	1	1	0	1	1	0	1	1	0	0	14
MBD1	1	1	1	1	0	0	1	1	0	1	0	1	1	1	0	0	0	1	1	0	1	1	1	0	1	1	1	18
ZNF205	1	1	1	1	0	0	1	1	0	1	0	1	1	1	0	0	0	1	1	1	1	1	1	1	1	1	1	20
ZZZ3	1	0	0	0	1	0	0	0	0	0	0	0	0	1	0	0	0	0	0	0	1	1	1	0	0	0	0	6
NCOA1	1	0	1	1	1	0	1	1	0	1	0	1	1	1	0	0	0	1	1	0	1	1	1	0	1	1	0	17
CAVIN1	1	0	1	1	0	0	0	0	0	1	0	0	0	1	0	0	0	1	1	0	1	0	1	0	0	0	0	9
HBP1	1	1	1	1	0	0	1	1	0	1	0	1	1	1	0	0	0	0	1	1	1	1	1	0	1	1	1	18
TOE1	1	0	1	1	1	1	1	1	1	1	0	1	1	1	0	0	0	0	0	0	1	1	1	1	1	1	1	19
RBM39	1	0	0	0	0	0	0	0	0	1	0	1	1	1	0	0	0	0	0	0	1	1	1	0	0	0	0	8
TEAD4	1	0	0	1	1	1	1	1	0	1	0	1	1	1	0	0	0	1	1	0	1	1	1	0	1	1	1	18
GATA4	1	1	0	1	0	1	1	1	0	1	0	1	0	1	0	0	0	1	1	1	1	0	1	0	1	0	1	16
CSDE1	1	0	1	0	0	0	0	0	0	1	0	1	1	1	0	0	0	0	1	0	1	1	1	0	0	0	1	11
PYGO2	1	0	1	0	0	0	0	0	0	1	0	1	0	1	0	0	0	0	1	1	1	1	1	0	0	0	0	10
ZFX	1	0	1	1	0	0	1	1	0	1	0	1	1	1	1	0	0	1	1	1	1	1	1	1	1	1	1	20
ZFP3	1	0	0	0	0	0	0	0	0	0	0	0	0	1	0	0	0	1	1	0	1	1	1	0	1	0	0	8
ZNF644	1	1	1	1	1	1	1	1	0	1	1	1	1	1	0	0	1	1	1	0	1	0	1	0	1	0	1	20
SP5	1	1	1	1	0	1	1	1	0	1	0	1	1	1	0	0	0	1	1	1	1	1	1	0	1	1	1	20
MTA1	1	0	1	1	1	1	1	1	0	1	0	1	1	1	0	0	0	1	1	0	1	1	1	1	1	1	1	20
KDM4B	1	0	0	0	0	0	0	0	0	1	0	1	1	1	0	0	0	1	0	1	1	1	1	0	1	0	1	12
HNF4G	1	0	0	1	0	1	1	1	1	1	0	1	0	1	0	0	1	1	1	1	1	0	1	0	1	0	1	17
ZHX2	1	1	1	1	0	1	1	1	0	1	0	1	1	1	0	0	0	0	0	0	1	1	1	0	1	0	1	16
TCF12	1	1	1	1	1	1	1	1	1	1	1	1	1	1	0	0	1	1	1	1	1	1	1	1	1	1	1	25
U2AF1	1	1	1	0	0	0	0	0	0	1	0	1	1	1	0	0	0	0	0	0	1	0	1	0	1	0	0	10
RFXANK	1	1	1	1	0	0	1	1	0	1	0	1	1	1	0	0	0	0	1	0	1	1	1	0	1	0	1	16
NFXL1	1	0	1	0	0	0	0	0	0	1	0	1	1	1	0	0	0	0	0	0	1	0	1	1	0	1	0	10
GTF2A2	1	0	1	0	0	0	0	0	0	1	0	1	1	1	0	0	0	0	1	1	1	1	1	0	0	0	0	11
PBX2	1	1	0	1	0	1	0	0	0	1	0	1	0	1	0	0	0	0	1	1	1	1	1	0	1	0	1	14
ZNF444	1	0	0	1	1	1	1	1	1	1	1	1	1	1	1	1	0	0	0	1	1	1	1	0	1	1	1	21
TCF7L2	1	0	1	1	0	1	1	1	0	1	1	1	1	1	1	1	0	1	1	0	1	1	1	1	1	0	1	21
MEF2D	1	0	1	1	1	0	1	1	0	1	0	1	1	1	0	0	0	1	1	0	1	1	1	0	0	1	0	16
MYRF	1	0	1	0	0	0	0	0	0	1	0	0	1	0	0	0	0	0	0	0	1	0	1	0	0	1	0	7
TBX3	1	1	1	0	0	0	0	0	0	1	0	0	0	0	0	0	1	0	1	1	1	1	1	0	0	1	1	12
HHEX	1	1	0	1	0	0	0	0	0	1	0	1	0	1	0	1	0	0	1	1	1	1	1	0	0	0	1	13
HMG20A	1	1	1	1	0	0	1	1	0	1	1	1	1	1	0	0	1	1	1	1	1	0	1	0	1	1	1	20
ZNF652	1	1	0	1	1	0	1	1	0	1	0	1	0	1	0	0	0	1	1	0	1	1	1	1	1	1	1	18
SMARCC2	1	1	0	1	0	0	0	0	0	1	0	1	0	1	0	0	1	0	1	1	0	0	1	0	0	0	0	10
ZNF282	1	0	0	0	0	0	0	0	0	1	1	0	0	0	0	0	0	0	0	0	0	0	0	0	0	0	0	3
EZH2	1	0	1	0	1	1	1	1	1	1	1	1	1	1	0	1	1	1	1	1	1	0	1	1	1	1	0	22
ZNF202	1	0	0	0	0	0	0	0	0	0	0	1	0	1	0	0	0	0	0	0	0	0	1	1	1	0	0	6
ZNF350	1	0	0	0	0	0	0	0	0	0	0	1	1	1	0	0	0	1	1	1	1	0	0	0	0	0	0	8
KLF7	1	0	1	0	0	0	1	1	1	1	0	1	1	1	0	0	0	1	1	0	1	1	1	1	1	1	1	18
NANOG	1	0	0	1	0	1	0	0	1	1	1	1	1	1	1	0	1	1	1	1	1	0	1	0	1	1	1	19
ZBED1	1	1	0	1	1	1	0	0	0	1	1	1	1	1	0	0	0	1	1	1	1	1	1	0	1	1	1	19
TAL1	1	0	1	1	1	1	1	1	0	1	0	1	1	1	0	0	0	1	1	1	1	1	1	0	0	1	1	19
STAT5A	1	0	0	1	1	1	0	0	0	1	1	1	1	1	0	0	0	1	1	0	1	1	1	0	1	1	1	17
NCOA2	1	0	0	0	1	0	0	0	0	0	0	0	0	0	0	0	0	1	1	0	1	0	1	0	0	1	1	8
CUX1	1	0	1	1	0	1	1	1	0	1	0	1	1	1	0	0	1	1	1	0	1	0	1	1	1	0	1	18
KHSRP	1	0	0	1	1	0	0	0	0	1	0	1	1	1	0	0	0	0	1	0	1	0	1	0	0	0	0	10
PHB2	1	0	1	1	1	0	0	0	0	1	0	1	1	1	0	0	0	1	1	0	1	1	1	0	0	0	0	13
YBX1	1	0	1	0	0	0	0	0	0	1	1	1	0	1	0	0	0	1	0	0	1	1	1	0	0	0	1	11
ZNF521	1	0	0	0	0	0	0	0	0	0	0	0	0	1	0	0	0	0	0	0	0	0	0	0	1	0	0	3
ZNF776	1	0	0	0	0	0	0	0	0	0	0	0	0	1	0	0	0	1	0	0	1	0	0	0	0	0	0	4
ZNF140	1	0	0	0	0	0	1	1	0	0	0	1	0	1	0	0	0	0	0	1	0	0	1	0	1	0	0	8
ARID2	1	0	0	0	0	1	0	0	0	1	0	1	1	1	0	0	0	1	1	0	1	1	1	0	0	1	1	13
ZNF513	1	0	0	0	0	0	0	0	0	1	0	1	1	1	0	0	0	1	1	0	1	1	1	1	1	0	0	12
CBLL2	1	0	0	0	0	0	0	0	0	1	0	1	1	1	0	0	0	1	0	1	1	1	0	0	1	0	0	10
ZNF133	1	0	0	1	1	1	1	1	1	1	0	1	1	1	0	0	0	1	0	0	0	1	0	0	1	0	0	14
TSC22D4	1	0	0	0	0	0	1	1	0	0	0	0	0	1	0	0	0	0	0	0	1	0	0	0	0	0	0	5
STAT3	1	0	1	1	0	1	1	1	1	1	0	1	1	1	1	1	1	1	1	0	1	1	1	1	1	1	0	22
ESRRA	1	0	0	1	1	1	1	1	0	1	0	1	1	1	0	1	0	1	0	0	1	1	1	0	1	1	1	18
BMI1	1	1	1	1	1	1	1	1	1	1	1	1	1	1	0	0	0	1	1	0	1	1	1	0	1	1	1	22
RFX1	1	0	0	1	1	1	1	1	1	1	0	1	1	1	0	1	0	1	1	0	1	1	1	1	1	1	1	21
ZNF174	1	0	0	0	0	0	1	1	0	0	0	1	0	1	0	0	0	1	1	0	0	0	0	0	0	0	0	7
ZC3H11A	1	0	0	0	1	0	0	0	0	0	0	1	1	1	0	0	0	1	0	0	1	1	1	0	1	0	0	10
NFE2L2	1	0	1	1	0	1	1	1	1	1	1	1	1	1	1	1	1	1	1	1	1	1	1	1	1	1	1	25
ZNF169	1	0	0	0	0	1	1	1	0	1	0	0	0	1	0	0	0	0	0	0	1	1	0	1	0	0	0	9
ZNF146	1	0	1	0	0	1	0	0	1	1	0	1	1	1	0	0	0	1	1	1	1	1	1	0	1	0	0	15
ZNF274	0	0	1	0	0	0	0	0	0	0	0	0	0	1	0	0	0	1	0	1	1	0	0	0	0	0	0	5
NFIB	0	0	1	1	0	0	1	1	1	1	0	1	1	1	1	0	0	1	1	1	1	1	1	0	1	1	1	19
U2AF2	0	0	1	0	0	0	0	0	0	1	0	0	1	1	0	0	0	0	0	0	1	1	1	0	0	0	1	8
DEK	0	0	1	1	1	0	1	1	0	1	0	1	1	1	0	1	0	1	0	0	1	0	1	0	1	0	1	15
KAT2B	0	0	1	0	0	0	0	0	0	0	0	1	1	1	0	0	0	1	0	1	0	0	1	0	0	0	0	7
SIX4	0	0	1	0	0	0	1	1	0	1	0	0	0	1	0	0	0	0	0	0	1	0	1	0	0	0	1	8
PAX8	0	0	1	0	0	1	1	1	0	1	1	1	1	1	0	0	0	1	1	0	1	0	1	0	0	0	0	13
COPS2	0	0	1	0	0	0	0	0	0	1	0	0	0	1	0	0	0	0	0	0	1	0	1	0	0	0	0	5
PPP1R10	0	0	1	0	0	0	1	1	0	1	0	0	1	1	0	0	0	0	0	0	1	0	1	0	0	0	0	8
CBX8	0	0	1	0	0	1	0	0	0	1	0	1	0	1	0	0	0	0	0	0	0	0	0	0	1	0	0	6
SIX5	0	0	1	0	0	0	0	0	0	1	0	1	0	1	0	0	0	0	0	0	1	1	0	0	0	1	0	7
ZNF148	0	0	1	0	0	1	0	0	0	1	0	0	0	1	0	0	0	1	0	0	1	0	0	0	1	0	0	7
TRIM25	0	0	1	0	0	0	0	0	0	1	0	1	1	1	0	0	0	0	1	1	1	1	1	0	0	0	1	11
ZBTB5	0	0	1	0	0	0	0	0	0	1	0	1	1	1	0	0	0	0	1	0	1	1	1	0	0	1	1	11
NUFIP1	0	0	1	1	0	0	0	0	0	0	0	0	0	0	0	0	0	0	1	0	1	1	0	0	1	0	0	6
KDM5A	0	0	1	1	0	0	0	0	0	1	0	1	1	1	0	0	0	0	0	1	1	1	1	0	1	0	0	11
ZHX1	0	0	1	1	0	0	1	1	0	1	0	1	1	1	1	1	0	0	0	0	1	1	1	1	1	0	0	15
STAT1	0	0	1	0	0	0	0	0	0	1	0	1	1	1	0	0	0	1	0	1	1	1	1	0	0	1	1	12
FUS	0	0	1	0	0	0	0	0	0	0	0	1	1	1	0	0	0	0	0	0	1	0	1	0	0	0	0	6
DNMT1	0	0	1	0	0	0	0	0	0	1	0	1	1	1	0	0	0	0	0	0	1	1	1	0	0	0	0	8
ZSCAN18	0	0	1	0	0	1	0	0	0	1	0	1	1	1	0	0	0	0	0	0	1	1	0	0	1	0	0	9
ZNF138	0	0	1	0	0	0	0	0	0	1	0	0	0	1	0	0	0	0	1	0	0	1	1	0	1	0	0	7
CBX5	0	0	1	0	0	0	0	0	0	0	0	1	1	1	0	0	0	1	1	0	1	1	1	0	0	0	0	9
EHMT2	0	0	0	1	1	1	1	1	0	1	0	1	1	1	0	0	0	1	1	0	1	1	1	0	1	0	0	15
IRF9	0	0	0	1	0	0	0	0	0	1	0	1	0	1	0	0	0	1	1	0	1	1	1	0	1	1	1	12
TEAD2	0	0	0	1	0	0	1	1	0	1	0	1	1	1	0	0	0	1	1	0	1	1	1	0	0	1	0	13
ZNF354B	0	0	0	1	0	0	0	0	0	1	0	1	0	1	0	0	0	1	1	1	1	0	0	0	1	0	0	9
ZNF768	0	0	0	1	0	0	1	1	0	1	0	0	0	1	1	0	0	0	0	0	0	1	1	1	1	0	0	10
MCM2	0	0	0	1	0	0	0	0	0	1	0	0	0	1	0	1	0	0	0	0	1	1	1	0	0	0	0	7
ZBTB7A	0	0	0	1	0	0	0	0	1	1	0	1	1	1	0	0	0	1	0	0	1	1	0	0	1	0	1	11
CDC5L	0	0	0	1	0	0	0	0	0	1	0	1	1	1	0	0	0	0	0	0	1	1	1	0	0	0	0	8
ZNF579	0	0	0	1	0	0	1	1	0	1	1	1	1	1	0	1	0	0	0	0	1	1	1	0	1	1	1	15
NCOA6	0	0	0	0	1	0	0	0	0	1	0	1	0	0	0	0	0	0	1	0	1	1	1	0	0	0	1	8
SUZ12	0	0	0	0	1	1	0	0	0	1	0	1	1	1	0	0	0	0	0	0	1	1	1	0	0	1	0	10
ZBTB7B	0	0	0	0	1	0	1	1	0	1	0	1	1	0	0	0	0	0	0	0	1	1	1	0	0	0	0	9
ZNF512B	0	0	0	0	1	1	1	1	1	1	0	1	1	1	0	0	0	0	1	0	1	0	1	0	1	0	1	14
NCOA3	0	0	0	0	1	1	1	1	0	1	0	1	0	1	0	0	1	1	0	0	1	0	1	0	1	0	0	12
ZNF239	0	0	0	0	1	0	0	0	0	1	0	1	0	1	0	0	0	0	1	1	0	1	0	1	1	0	0	9
ZFP36	0	0	0	0	0	1	0	0	0	1	0	1	1	1	1	1	0	0	0	0	1	1	1	0	1	1	0	12
ZNF8	0	0	0	0	0	1	0	0	0	1	0	0	1	0	0	0	0	0	0	0	1	0	1	0	1	0	0	6
ZBTB21	0	0	0	0	0	1	1	1	1	1	0	1	1	1	0	0	0	1	0	0	1	1	1	1	1	0	1	15
ZNF585B	0	0	0	0	0	1	0	0	1	1	0	1	0	1	0	0	0	0	1	0	0	1	0	0	1	0	0	8
ZSCAN16	0	0	0	0	0	1	1	1	1	1	0	1	1	1	0	0	0	1	1	0	1	1	0	0	1	0	0	13
ZNF785	0	0	0	0	0	1	1	1	0	1	0	1	1	1	0	0	0	1	0	0	1	1	0	0	1	0	0	11
ZSCAN26	0	0	0	0	0	1	1	1	0	1	0	0	0	1	0	0	0	0	0	0	1	1	0	1	0	0	0	8
ZNF704	0	0	0	0	0	1	0	0	0	0	0	1	0	0	0	0	0	0	0	0	1	0	0	0	1	0	0	4
ZBTB6	0	0	0	0	0	1	1	1	1	1	0	1	1	1	0	0	0	1	1	1	1	1	1	1	1	0	0	16
ZNF37A	0	0	0	0	0	1	0	0	0	0	0	0	1	1	0	0	0	1	1	0	1	1	0	0	1	0	0	8
ZNF221	0	0	0	0	0	0	1	1	0	0	0	1	0	1	0	0	0	0	1	0	0	0	0	0	1	0	0	6
ZBTB1	0	0	0	0	0	0	1	1	0	1	0	1	1	1	0	0	0	1	1	0	1	0	1	1	1	0	0	12
ZNF132	0	0	0	0	0	0	1	1	0	0	0	1	0	1	0	0	0	1	0	0	0	0	0	0	0	0	0	5
ZNF266	0	0	0	0	0	0	1	1	0	0	0	0	0	0	0	0	0	0	0	1	0	0	1	0	1	0	0	5
ZNF548	0	0	0	0	0	0	1	1	0	1	0	1	1	1	0	0	0	0	0	0	1	0	1	0	1	0	0	9
ZNF223	0	0	0	0	0	0	1	1	0	1	0	1	0	1	0	0	0	0	0	0	0	1	1	1	0	0	0	8
CBX2	0	0	0	0	0	0	1	1	0	1	0	0	0	1	0	0	0	0	1	0	0	0	1	0	1	0	0	7
ZNF547	0	0	0	0	0	0	1	1	1	1	0	1	1	1	0	0	0	0	0	1	0	0	1	0	1	0	0	10
RBAK	0	0	0	0	0	0	1	1	1	1	0	1	0	1	0	0	0	0	0	1	1	1	1	0	0	0	0	10
ZNF624	0	0	0	0	0	0	0	0	1	0	0	1	1	1	0	0	0	0	0	0	1	0	0	1	1	0	0	7
ZNF16	0	0	0	0	0	0	0	0	1	1	0	0	0	1	0	0	0	0	0	1	0	1	0	0	0	0	0	5
HSF1	0	0	0	0	0	0	0	0	0	1	0	1	0	1	0	0	0	0	1	0	1	0	1	0	0	0	0	6
E2F8	0	0	0	0	0	0	0	0	0	1	0	1	1	1	0	0	0	0	0	0	1	0	1	0	0	0	0	6
ZNF507	0	0	0	0	0	0	0	0	0	1	0	0	0	1	0	0	0	1	0	0	1	0	0	0	0	0	0	4
E4F1	0	0	0	0	0	0	0	0	0	1	0	1	1	0	0	0	0	0	0	0	1	1	1	0	1	0	1	8
ZNF311	0	0	0	0	0	0	0	0	0	1	0	0	0	1	0	0	0	0	0	0	1	0	0	0	0	0	0	3
ZNF571	0	0	0	0	0	0	0	0	0	1	0	0	0	1	0	0	0	1	0	0	0	0	0	0	0	0	0	3
ZNF740	0	0	0	0	0	0	0	0	0	1	0	1	0	1	0	0	0	1	1	0	1	1	1	0	0	1	1	10
PLRG1	0	0	0	0	0	0	0	0	0	1	0	0	0	1	0	0	0	0	0	0	0	0	0	0	0	0	0	2
ZNF114	0	0	0	0	0	0	0	0	0	1	0	1	0	1	0	0	0	1	0	0	0	0	0	0	0	0	0	4
ZNF248	0	0	0	0	0	0	0	0	0	1	0	0	0	1	0	0	0	0	0	0	0	0	0	0	0	0	0	2
ARHGAP35	0	0	0	0	0	0	0	0	0	1	0	1	1	1	0	0	0	0	0	0	1	1	1	0	0	0	0	7
ZNF23	0	0	0	0	0	0	0	0	0	1	0	0	0	0	0	0	0	0	0	0	1	1	0	0	0	0	0	3
ZNF473	0	0	0	0	0	0	0	0	0	1	0	0	0	1	0	0	0	0	0	0	1	0	0	0	0	0	0	3
ZNF544	0	0	0	0	0	0	0	0	0	1	0	0	0	1	0	0	0	1	1	0	0	0	0	0	0	0	0	4
ZNF791	0	0	0	0	0	0	0	0	0	1	0	1	0	1	0	0	0	0	0	1	1	0	1	1	1	0	0	8
SRF	0	0	0	0	0	0	0	0	0	1	0	1	0	1	0	0	0	0	0	0	1	1	1	0	0	0	0	6
SREBF2	0	0	0	0	0	0	0	0	0	1	0	1	1	1	1	0	0	0	0	1	1	1	1	0	1	1	0	11
SNIP1	0	0	0	0	0	0	0	0	0	1	0	1	1	1	0	0	0	0	0	0	1	1	1	0	1	0	0	8
NCOA4	0	0	0	0	0	0	0	0	0	1	0	0	0	1	0	0	0	0	0	0	1	1	1	0	0	0	0	5
IRF5	0	0	0	0	0	0	0	0	0	1	0	1	1	1	0	0	0	0	0	0	0	1	0	0	0	0	0	5
ZNF416	0	0	0	0	0	0	0	0	0	1	0	1	1	1	0	0	0	0	0	0	1	1	0	0	0	0	0	6
ZNF488	0	0	0	0	0	0	0	0	0	1	0	1	0	1	0	0	0	1	1	0	1	0	1	0	1	0	0	8
ZNF514	0	0	0	0	0	0	0	0	0	1	0	0	0	1	0	0	0	0	0	1	0	0	0	0	1	0	0	4
ZNF404	0	0	0	0	0	0	0	0	0	1	0	1	0	1	0	0	0	0	0	0	0	0	0	0	1	0	0	4
YBX3	0	0	0	0	0	0	0	0	0	1	0	1	1	1	0	0	0	0	0	0	1	1	1	0	0	0	0	7
ZNF707	0	0	0	0	0	0	0	0	0	1	0	1	1	1	0	0	0	0	0	1	0	1	0	1	1	0	0	8
REPIN1	0	0	0	0	0	0	0	0	0	1	0	1	1	1	0	0	0	0	1	0	1	1	0	1	1	0	0	9
ZNF155	0	0	0	0	0	0	0	0	0	1	0	0	1	0	0	0	0	0	0	0	0	0	0	0	0	0	0	2
DEAF1	0	0	0	0	0	0	0	0	0	1	0	1	0	1	0	0	0	0	0	0	1	1	0	0	1	0	1	7
ZNF560	0	0	0	0	0	0	0	0	0	0	0	1	0	0	0	0	0	0	0	0	0	0	1	0	1	0	0	3
ZNF622	0	0	0	0	0	0	0	0	0	0	0	1	0	1	0	0	0	0	0	0	0	0	0	0	0	0	0	2
ZNF658	0	0	0	0	0	0	0	0	0	0	0	1	0	1	0	0	0	0	0	0	1	0	0	0	0	0	0	3
CCAR2	0	0	0	0	0	0	0	0	0	0	0	1	0	1	0	0	0	0	0	0	1	0	0	0	0	0	0	3
ZNF26	0	0	0	0	0	0	0	0	0	0	0	1	0	1	0	0	0	0	0	0	1	0	1	0	0	0	0	4
SNRNP70	0	0	0	0	0	0	0	0	0	0	0	1	1	1	0	0	0	0	0	0	0	0	0	0	0	0	0	3
ZNF175	0	0	0	0	0	0	0	0	0	0	0	1	0	1	0	0	0	0	0	0	0	1	0	0	0	0	0	3
ZNF157	0	0	0	0	0	0	0	0	0	0	0	1	0	1	0	0	0	0	0	0	0	0	0	1	1	0	0	4
ZNF530	0	0	0	0	0	0	0	0	0	0	0	1	0	0	0	0	0	0	0	1	0	1	1	1	1	0	0	6
E2F7	0	0	0	0	0	0	0	0	0	0	0	1	0	1	0	0	0	0	0	0	1	1	1	0	0	0	1	6
PRDM2	0	0	0	0	0	0	0	0	0	0	0	0	1	1	0	0	0	0	0	0	0	0	0	0	0	0	0	2
SFPQ	0	0	0	0	0	0	0	0	0	0	0	0	1	0	0	0	0	0	0	0	0	0	0	0	0	0	0	1
ZNF112	0	0	0	0	0	0	0	0	0	0	0	0	0	1	0	0	0	1	0	0	0	0	0	0	0	0	0	2
ZNF747	0	0	0	0	0	0	0	0	0	0	0	0	0	1	0	0	0	0	0	0	1	1	0	0	0	0	0	3
XRCC3	0	0	0	0	0	0	0	0	0	0	0	0	0	1	0	0	0	0	0	0	0	0	0	0	0	0	0	1
ZNF670	0	0	0	0	0	0	0	0	0	0	0	0	0	1	0	0	0	0	0	0	1	0	0	0	0	0	0	2
ZNF621	0	0	0	0	0	0	0	0	0	0	0	0	0	1	0	0	0	0	0	0	0	0	0	0	1	0	0	2
ZNF433	0	0	0	0	0	0	0	0	0	0	0	0	0	1	0	0	0	0	0	0	1	0	1	0	1	0	0	4
ZBTB49	0	0	0	0	0	0	0	0	0	0	0	0	0	1	0	0	0	0	0	0	1	1	0	0	0	0	0	3
ZNF211	0	0	0	0	0	0	0	0	0	0	0	0	0	1	0	0	0	0	0	0	0	0	0	0	0	0	0	1
MCM3	0	0	0	0	0	0	0	0	0	0	0	0	0	1	0	0	0	0	0	0	1	0	0	0	0	0	0	2
MCM5	0	0	0	0	0	0	0	0	0	0	0	0	0	1	0	0	0	0	0	0	1	0	0	0	0	0	0	2
ZNF701	0	0	0	0	0	0	0	0	0	0	0	0	0	1	0	0	0	1	0	0	1	1	0	1	1	0	0	6
ZNF626	0	0	0	0	0	0	0	0	0	0	0	0	0	1	0	0	0	1	0	0	0	1	0	0	1	0	0	4
AEBP2	0	0	0	0	0	0	0	0	0	0	0	0	0	0	0	0	0	0	1	1	1	1	0	1	1	0	0	6
POLR3G	0	0	0	0	0	0	0	0	0	0	0	0	0	0	0	0	0	0	0	0	1	0	0	0	0	0	0	1
ZFP41	0	0	0	0	0	0	0	0	0	0	0	0	0	0	0	0	0	0	0	0	0	1	0	1	0	0	0	2
ZNF19	0	0	0	0	0	0	0	0	0	0	0	0	0	0	0	0	0	0	0	0	0	0	1	0	1	0	0	2
	417	345	315	351	192	239	317	317	174	477	129	465	423	505	73	72	103	367	394	289	478	409	452	219	408	282	340

## Sheet: Hoja1
	Tiam2	Tfb1m	Dok5	Tmem135	Fam181b	Tenm4	Plk2	Stk32a	Dpysl3	Prex1	Fstl5	Vps45	Hist2h2be	Pde4dip	Tusc1	Fzd10	Grid2	Zc3h12c	Arhgap18	Cdh6	Fam91a1	A1bg	Pvt1	Adamts5	Csnk1g3	Chchd6	Zfat	Frecuencia
REST	1	1	1	1	1	1	1	1	1	1	1	1	1	1	1	1	1	1	1	1	1	1	1	1	1	1	1	27
TBP	1	1	1	1	1	1	1	1	1	1	1	1	1	1	1	1	1	1	1	1	1	1	1	1	1	1	1	27
CEBPB	1	1	1	1	1	1	1	1	1	1	1	1	1	1	1	1	1	1	1	1	1	1	1	1	1	1	1	27
EP300	1	1	1	1	1	1	1	1	1	1	1	1	1	1	1	1	1	1	1	1	1	1	1	1	1	1	1	27
POLR2A	1	1	1	1	1	1	1	1	1	1	1	1	1	1	1	1	1	1	1	1	1	1	1	1	1	1	1	27
FOS	1	1	1	1	1	1	1	1	1	1	1	1	1	1	1	1	1	1	1	1	1	1	1	1	1	1	1	27
DPF2	1	1	1	1	1	1	1	1	1	1	1	1	1	1	1	1	1	1	1	1	1	1	1	1	1	1	1	27
CTCF	1	1	1	1	1	1	1	1	1	1	1	1	1	1	1	1	1	1	1	1	1	1	1	1	1	1	1	27
RAD21	1	1	1	1	1	1	1	1	1	1	1	1	1	1	1	1	1	1	1	1	1	1	1	1	1	1	1	27
SP1	1	1	1	1	1	1	1	1	1	1	1	1	1	1	1	1	1	1	1	1	1	1	1	1	1	1	1	27
YY1	1	1	1	1	1	1	1	1	1	1	1	1	1	1	1	0	1	1	1	1	1	1	1	1	1	1	1	26
JUND	1	1	1	1	1	1	1	1	1	1	1	1	1	1	1	0	1	1	1	1	1	1	1	1	1	1	1	26
PKNOX1	1	1	1	1	1	1	1	1	1	1	1	1	1	1	0	1	1	1	1	1	1	1	1	1	1	1	1	26
CREM	1	1	1	1	1	1	1	1	1	1	1	1	1	1	0	1	1	1	1	1	1	1	1	1	1	1	1	26
ZNF143	1	1	1	1	1	1	1	1	1	1	1	1	1	1	1	1	0	1	1	1	1	1	1	1	1	1	1	26
HNF4A	1	1	1	1	1	1	1	1	1	1	1	1	1	1	1	1	1	1	1	1	1	1	1	1	1	0	1	26
ZNF384	1	1	1	1	1	1	1	1	1	1	1	1	1	1	0	1	1	1	1	1	1	1	1	1	1	1	1	26
MAFF	1	1	1	1	1	1	1	1	1	1	1	1	1	1	1	1	1	1	1	1	1	0	1	1	1	1	1	26
L3MBTL2	1	1	1	1	1	1	1	1	1	1	0	1	1	1	1	1	1	1	1	1	1	1	1	1	1	1	1	26
ARNT	1	1	1	1	1	1	1	1	1	1	1	1	1	1	1	0	1	1	1	1	1	1	1	1	1	1	1	26
RXRA	1	1	1	1	1	1	1	1	1	1	0	1	1	1	1	1	1	1	1	1	1	1	1	1	1	1	1	26
TAF1	1	1	1	1	0	1	1	1	1	1	1	1	1	1	1	1	1	1	1	1	1	1	1	1	1	1	1	26
ZNF217	1	1	1	1	1	1	1	1	1	1	1	1	1	1	1	1	1	1	1	1	1	1	1	0	1	1	1	26
GLIS2	1	1	1	1	1	1	1	1	1	1	1	1	1	1	1	0	1	1	1	1	1	1	1	1	1	1	1	26
TRIM22	1	1	1	1	1	1	1	1	1	1	1	1	1	1	1	1	0	1	1	0	1	1	1	1	1	1	1	25
IKZF1	1	1	1	1	1	1	1	1	1	1	1	1	1	1	0	0	1	1	1	1	1	1	1	1	1	1	1	25
ARID3A	1	1	1	1	1	1	1	1	1	1	1	1	1	1	0	0	1	1	1	1	1	1	1	1	1	1	1	25
CREB1	1	1	1	1	1	1	1	1	1	1	1	1	1	1	0	1	1	1	1	1	1	1	1	0	1	1	1	25
GATAD2B	1	1	1	1	1	1	1	1	1	1	1	1	1	1	0	0	1	1	1	1	1	1	1	1	1	1	1	25
KDM1A	1	1	1	1	1	1	1	1	1	1	1	1	1	1	0	1	1	1	1	0	1	1	1	1	1	1	1	25
SMC3	1	1	1	1	1	1	1	1	1	1	0	1	1	1	1	1	1	1	1	1	1	0	1	1	1	1	1	25
USF1	1	1	1	1	1	1	1	1	1	1	1	1	1	1	0	1	1	1	1	1	1	0	1	1	1	1	1	25
GLIS1	1	1	1	1	1	1	1	1	1	1	0	1	1	1	1	0	1	1	1	1	1	1	1	1	1	1	1	25
CTBP1	1	1	1	1	1	1	1	1	0	1	1	1	1	1	1	1	1	1	1	1	1	1	1	0	1	1	1	25
FOXA1	1	1	1	1	0	1	1	1	1	1	1	1	1	1	1	1	1	1	1	1	1	1	1	0	1	1	1	25
MNT	1	1	1	1	1	1	1	1	0	1	1	1	1	1	1	1	0	1	1	1	1	1	1	1	1	1	1	25
MAX	1	1	1	1	1	1	1	1	1	1	0	1	1	1	1	1	0	1	1	1	1	1	1	1	1	1	1	25
ZBTB26	1	1	1	1	1	1	1	1	1	1	0	1	1	1	1	0	1	1	1	1	1	1	1	1	1	1	1	25
ZNF335	1	1	1	1	1	1	1	1	1	1	1	1	1	1	1	0	0	1	1	1	1	1	1	1	1	1	1	25
TCF12	1	1	1	1	1	1	1	1	1	1	1	1	1	1	0	0	1	1	1	1	1	1	1	1	1	1	1	25
NFE2L2	1	0	1	1	0	1	1	1	1	1	1	1	1	1	1	1	1	1	1	1	1	1	1	1	1	1	1	25
SIN3A	1	1	1	1	0	1	1	1	1	1	1	1	1	1	0	0	1	1	1	1	1	1	1	1	1	1	1	24
SPI1	1	1	1	1	1	1	1	1	1	1	1	1	1	1	0	0	0	1	1	1	1	1	1	1	1	1	1	24
ATF2	1	1	1	1	1	1	1	1	1	1	1	1	1	1	0	0	0	1	1	1	1	1	1	1	1	1	1	24
BACH1	1	1	1	1	0	1	1	1	1	1	1	1	1	1	0	1	1	1	1	0	1	1	1	1	1	1	1	24
MTA2	1	1	1	1	1	1	1	1	1	1	1	1	1	1	1	0	0	1	1	1	1	1	1	0	1	1	1	24
MAFK	1	1	1	1	1	1	1	1	1	1	1	1	1	1	1	0	1	1	1	1	1	0	1	0	1	1	1	24
RFX5	1	1	1	1	1	1	1	1	1	1	0	1	1	1	0	1	0	1	1	1	1	1	1	1	1	1	1	24
ZNF654	1	1	1	1	1	1	1	1	1	1	0	1	1	1	1	1	1	1	1	0	1	0	1	1	1	1	1	24
EGR2	1	1	1	1	0	1	1	1	1	1	0	1	1	1	1	1	0	1	1	1	1	1	1	1	1	1	1	24
ZFHX2	1	1	1	1	0	1	1	1	1	1	0	1	1	1	1	1	0	1	1	1	1	1	1	1	1	1	1	24
FOXA2	1	1	1	1	1	1	1	1	1	1	1	1	1	1	0	0	1	1	1	1	1	0	1	1	1	1	1	24
CEBPG	1	1	1	1	1	1	1	1	1	1	0	1	1	1	0	0	1	1	1	1	1	1	1	1	1	1	1	24
ZNF24	1	1	1	1	1	1	1	1	1	1	1	1	1	1	0	0	0	1	1	1	1	1	1	1	1	1	1	24
ZFP69B	1	1	1	1	1	1	1	1	1	1	0	1	1	1	0	0	1	1	1	1	1	1	1	1	1	1	1	24
ZNF692	1	1	1	1	1	1	1	1	1	1	0	1	1	1	0	0	1	1	1	1	1	1	1	1	1	1	1	24
ZBTB17	1	1	1	1	1	1	1	1	1	1	1	1	1	1	0	0	1	1	1	1	1	1	1	1	1	1	0	24
MAZ	1	1	1	1	0	1	1	1	0	1	1	1	1	1	1	1	0	1	1	1	1	1	1	1	1	1	1	24
SOX5	1	1	1	1	0	1	1	1	0	1	1	1	1	1	0	1	1	1	1	1	1	1	1	1	1	1	1	24
EGR1	1	1	1	1	0	1	1	1	1	1	1	1	1	1	1	0	0	1	1	1	1	1	1	1	1	1	1	24
SOX13	1	1	1	1	0	1	1	1	0	1	1	1	1	1	0	1	1	1	1	1	1	1	1	1	1	1	1	24
SP3	1	1	1	1	0	1	1	1	1	1	0	1	1	1	1	0	1	1	1	1	1	1	1	1	1	1	1	24
XRCC5	1	1	1	1	1	1	1	1	1	1	0	1	1	1	0	1	0	1	1	1	1	1	1	1	1	1	1	24
PATZ1	1	1	1	1	1	1	1	1	1	1	0	1	1	1	0	0	1	1	1	1	1	1	1	1	1	1	1	24
ATF7	1	1	1	1	1	1	1	1	1	1	1	1	1	1	0	0	0	1	1	1	1	1	1	1	1	1	1	24
SCRT2	1	1	0	1	1	1	1	1	1	1	0	1	1	1	0	1	1	1	1	1	1	1	1	1	1	1	1	24
FOSL2	1	1	1	1	1	1	1	1	0	1	1	1	1	1	0	1	1	1	1	1	1	1	1	0	1	0	1	23
ELF1	1	1	1	1	0	1	1	1	0	1	1	1	1	1	1	1	0	1	1	1	1	1	1	0	1	1	1	23
TARDBP	1	1	1	1	1	1	1	1	1	1	1	1	1	1	0	0	0	1	1	0	1	1	1	1	1	1	1	23
RAD51	1	1	0	1	1	1	1	1	1	1	1	1	1	1	0	1	0	1	1	1	1	1	1	0	1	1	1	23
ZNF687	1	1	1	1	0	1	1	1	1	1	1	1	1	1	0	0	0	1	1	1	1	1	1	1	1	1	1	23
RUNX3	1	1	1	1	1	1	1	1	1	1	1	1	1	1	0	0	0	1	1	1	1	1	1	0	1	1	1	23
RELB	1	1	1	1	0	1	1	1	1	1	1	1	1	1	0	0	1	1	1	1	1	1	1	0	1	1	1	23
CHD2	1	1	1	1	1	1	0	0	1	1	0	1	1	1	1	0	1	1	1	1	1	1	1	1	1	1	1	23
BHLHE40	1	1	1	1	0	1	1	1	1	1	1	1	1	1	0	0	0	1	1	1	1	1	1	1	1	1	1	23
ATF3	1	1	1	1	1	1	1	1	0	1	0	1	1	1	0	0	1	1	1	1	1	1	1	1	1	1	1	23
CEBPA	1	1	1	1	1	1	1	1	0	1	1	1	1	1	0	0	1	1	1	1	1	1	1	0	1	1	1	23
ZIC2	1	1	1	1	0	1	1	1	1	1	0	1	1	1	1	0	0	1	1	1	1	1	1	1	1	1	1	23
TRIM28	1	1	1	1	0	1	1	1	0	1	1	1	1	1	0	1	1	1	1	1	1	1	1	1	1	0	1	23
ZBTB8A	1	1	1	1	0	1	1	1	1	1	0	1	1	1	1	0	0	1	1	1	1	1	1	1	1	1	1	23
ZXDB	1	1	1	1	1	1	1	1	1	1	0	1	1	1	0	0	0	1	1	1	1	1	1	1	1	1	1	23
ZEB2	1	1	1	1	1	1	1	1	1	1	0	1	1	1	1	0	0	1	1	0	1	1	1	1	1	1	1	23
PRDM10	1	1	1	1	1	1	1	1	1	1	0	1	1	1	0	0	0	1	1	1	1	1	1	1	1	1	1	23
KLF8	1	1	1	1	0	1	1	1	1	1	0	1	1	1	1	0	0	1	1	1	1	1	1	1	1	1	1	23
PRDM1	1	1	0	1	1	1	1	1	1	1	1	1	1	1	0	0	1	1	1	1	1	0	1	1	1	1	1	23
NFIC	1	1	1	1	1	1	1	1	1	1	0	1	1	1	0	0	0	1	1	1	1	1	1	1	1	1	1	23
USF2	1	1	1	1	1	1	1	1	0	1	1	1	1	1	0	1	0	0	1	1	1	1	1	1	1	1	1	23
ZBTB40	1	1	0	1	1	1	1	1	0	1	1	1	1	1	1	0	0	1	1	1	1	1	1	1	1	1	1	23
HDAC2	1	1	1	1	1	1	1	1	1	1	1	1	1	1	0	0	0	1	1	1	1	1	1	0	1	1	1	23
NR2F1	1	1	1	1	1	1	1	1	1	1	1	1	1	1	0	0	0	1	1	1	1	1	1	0	1	1	1	23
NR2F6	1	1	1	1	1	1	1	1	0	1	1	1	1	1	0	0	1	1	1	1	1	1	1	0	1	1	1	23
ELF3	1	1	0	1	1	1	1	1	0	1	1	1	1	1	0	0	1	1	1	1	1	1	1	1	1	1	1	23
SMARCE1	1	1	0	1	1	1	1	1	0	1	0	1	1	1	1	1	1	1	1	1	1	1	1	0	1	1	1	23
GATAD2A	1	1	1	1	1	1	1	1	0	1	1	1	1	1	0	0	1	1	1	1	1	1	1	0	1	1	1	23
FOXA3	1	1	1	1	0	1	1	1	0	1	1	1	1	1	0	0	1	1	1	1	1	1	1	1	1	1	1	23
LEF1	1	1	1	1	1	0	1	1	1	1	0	1	1	1	0	0	1	1	1	1	1	1	1	1	1	1	1	23
ZBTB20	1	1	1	1	1	1	1	1	1	1	0	1	1	1	0	0	0	1	1	1	1	1	1	1	1	1	1	23
FOXP1	1	1	1	1	1	0	1	1	0	1	1	1	1	1	0	1	1	1	1	1	1	1	1	1	1	0	1	23
BCL11A	1	1	1	1	0	1	1	1	1	1	1	1	1	1	0	0	0	1	1	0	1	1	1	1	1	1	1	22
SMARCA5	1	1	1	1	1	1	0	0	0	1	1	1	1	1	0	1	0	1	1	1	1	1	1	1	1	1	1	22
NFE2	1	1	1	1	1	1	1	1	1	1	0	1	1	1	0	0	0	1	1	1	1	0	1	1	1	1	1	22
BATF	1	1	1	0	1	1	1	1	1	1	1	1	1	1	0	0	0	1	1	1	1	1	1	0	1	1	1	22
IKZF2	1	1	1	1	0	1	1	1	1	1	1	1	1	1	0	0	0	1	1	1	1	1	1	0	1	1	1	22
ZNF660	1	1	0	1	1	1	1	1	1	1	0	1	1	1	1	0	0	1	1	1	1	1	1	1	1	0	1	22
CBFA2T3	1	1	1	1	1	1	1	1	1	1	0	1	1	1	0	0	0	1	1	1	1	1	1	0	1	1	1	22
MLLT1	1	1	1	1	0	1	1	1	1	1	1	1	1	1	0	0	0	1	1	1	1	1	1	0	1	1	1	22
SAP130	1	1	1	1	0	0	1	1	0	1	1	1	1	1	0	0	1	1	1	1	1	1	1	1	1	1	1	22
HLF	1	1	1	1	1	1	1	1	0	1	0	1	1	1	0	0	1	1	1	1	1	1	1	1	1	0	1	22
ZNF600	1	1	0	1	0	1	1	1	1	1	0	1	1	1	1	0	0	1	1	1	1	1	1	1	1	1	1	22
ZNF341	1	1	0	1	0	1	1	1	1	1	0	1	1	1	0	0	1	1	1	1	1	1	1	1	1	1	1	22
MYC	1	1	1	1	1	1	0	0	1	1	1	1	1	1	0	0	0	1	1	1	1	1	1	1	1	1	1	22
ZNF189	1	1	1	1	0	1	1	1	1	1	0	1	1	1	0	0	1	1	1	1	1	1	1	1	1	0	1	22
NR2F2	1	1	0	1	1	1	1	1	1	1	0	1	1	1	1	0	0	1	1	1	1	1	1	0	1	1	1	22
NCOR1	1	1	1	1	1	1	1	1	0	1	0	1	1	1	0	0	1	1	1	1	1	1	1	0	1	1	1	22
MBD2	1	1	1	1	1	1	1	1	0	1	0	1	1	1	0	1	0	1	1	1	1	1	1	0	1	1	1	22
SP2	1	1	0	1	1	1	1	1	1	1	0	1	1	1	0	0	0	1	1	1	1	1	1	1	1	1	1	22
GABPA	1	1	1	1	0	1	1	1	0	1	0	1	1	1	1	0	0	1	1	1	1	1	1	1	1	1	1	22
RARA	1	1	1	1	1	1	1	1	0	1	1	1	1	1	0	0	1	1	1	1	1	1	1	0	1	0	1	22
TEAD3	1	1	1	1	1	1	1	1	0	1	0	1	1	1	0	0	1	1	1	1	1	1	1	0	1	1	1	22
ZNF2	1	1	1	1	1	1	1	1	1	1	0	1	1	1	0	0	0	1	1	1	1	1	1	1	1	1	0	22
RXRB	1	1	1	1	1	0	1	1	0	1	1	1	1	1	0	0	1	1	1	1	1	1	1	0	1	1	1	22
NFIA	1	1	1	1	1	1	1	1	0	1	0	1	1	1	0	0	1	1	1	0	1	1	1	1	1	1	1	22
MIXL1	1	1	1	1	0	1	1	1	0	1	1	1	1	1	0	0	1	1	1	1	1	1	1	0	1	1	1	22
RNF2	1	1	1	1	1	1	1	1	0	1	0	1	1	1	0	0	0	1	1	1	1	1	1	1	1	1	1	22
SOX6	1	1	1	1	1	1	1	1	0	1	1	1	1	1	0	0	0	1	1	1	1	1	1	0	1	1	1	22
MTA3	1	1	1	1	1	1	1	1	0	1	1	1	1	1	0	0	0	1	1	1	1	1	1	0	1	1	1	22
ZGPAT	1	1	1	1	0	0	1	1	0	1	1	1	1	1	0	0	1	1	1	1	1	1	1	1	1	1	1	22
SKI	1	1	1	1	1	0	1	1	0	1	1	1	1	1	0	0	0	1	1	1	1	1	1	1	1	1	1	22
TEAD1	1	1	1	1	0	1	1	1	0	1	1	1	1	1	0	0	1	1	1	1	1	1	1	0	1	1	1	22
EZH2	1	0	1	0	1	1	1	1	1	1	1	1	1	1	0	1	1	1	1	1	1	0	1	1	1	1	0	22
STAT3	1	0	1	1	0	1	1	1	1	1	0	1	1	1	1	1	1	1	1	0	1	1	1	1	1	1	0	22
BMI1	1	1	1	1	1	1	1	1	1	1	1	1	1	1	0	0	0	1	1	0	1	1	1	0	1	1	1	22
JUN	1	1	1	1	0	0	1	1	1	1	1	1	1	1	0	0	1	1	1	1	1	0	1	1	1	0	1	21
NBN	1	1	1	1	1	1	0	0	1	1	1	1	1	1	0	0	0	1	1	1	1	1	1	0	1	1	1	21
ZNF362	1	0	0	1	1	1	1	1	1	1	0	1	1	1	0	1	0	1	1	1	1	1	1	1	1	0	1	21
SP7	1	1	1	1	0	1	1	1	1	1	0	1	1	1	0	0	0	1	1	1	1	1	1	1	1	0	1	21
ZNF366	1	1	1	1	1	1	1	1	1	1	0	1	1	1	0	0	0	1	1	1	1	1	1	1	1	0	0	21
ZNF561	1	1	0	1	0	1	1	1	1	1	0	1	1	1	1	0	0	1	1	1	1	1	1	1	1	0	1	21
KLF10	1	1	1	1	0	1	1	1	1	1	0	1	1	1	0	0	0	1	1	1	1	1	1	1	1	0	1	21
KLF9	1	1	1	1	1	1	0	0	1	1	0	1	1	1	0	0	0	1	1	1	1	1	1	1	1	1	1	21
THAP11	1	1	1	1	0	0	1	1	0	1	1	1	1	1	0	0	1	1	1	1	1	1	1	0	1	1	1	21
EBF1	1	1	1	0	0	1	0	0	1	1	1	1	1	1	1	0	0	1	1	1	1	1	1	1	1	1	1	21
SMAD4	1	1	1	1	0	0	1	1	0	1	1	1	1	1	0	0	0	1	1	1	1	1	1	1	1	1	1	21
ETV4	1	1	1	1	0	1	1	1	0	1	0	1	1	1	0	1	0	1	1	1	1	1	1	0	1	1	1	21
DMAP1	1	1	1	1	1	0	1	1	0	1	1	1	1	1	0	0	0	1	1	0	1	1	1	1	1	1	1	21
BCL6	1	1	1	1	0	1	1	1	0	1	0	1	1	1	0	0	1	1	1	1	1	1	1	0	1	1	1	21
ZBTB48	1	1	1	1	1	1	1	1	1	1	0	1	1	1	0	0	0	1	1	0	1	1	1	1	1	1	0	21
GTF2F1	1	1	1	1	0	1	1	1	0	1	0	1	1	1	0	0	0	1	1	1	1	1	1	1	1	1	1	21
FOXK2	1	1	1	1	1	0	1	1	0	1	1	1	1	1	0	0	0	1	1	1	1	1	1	0	1	1	1	21
SMARCA4	1	1	1	1	1	1	1	1	0	1	0	1	1	1	0	0	0	1	1	1	1	1	1	0	1	1	1	21
GATAD1	1	1	1	1	0	0	1	1	0	1	1	1	1	1	0	0	0	1	1	1	1	1	1	1	1	1	1	21
ZNF792	1	1	1	0	0	1	1	1	0	1	0	1	1	1	0	0	1	1	1	1	1	1	1	1	1	1	1	21
ZSCAN29	1	1	1	1	1	0	1	1	0	1	1	1	1	1	0	0	0	1	1	1	1	1	1	1	1	0	1	21
ZKSCAN1	1	1	1	1	1	1	1	1	0	1	0	1	1	1	1	0	0	0	1	1	1	1	1	0	1	1	1	21
KLF1	1	1	1	1	1	1	0	0	1	1	0	1	1	1	0	0	0	1	1	1	1	1	1	1	1	1	1	21
NFIL3	1	1	1	1	0	0	1	1	0	1	1	1	1	1	0	0	1	1	1	1	1	1	1	1	1	0	1	21
KAT8	1	1	1	1	1	0	1	1	0	1	0	1	1	1	0	0	1	1	1	1	1	1	1	0	1	1	1	21
TRIM24	1	1	1	1	1	1	1	1	0	1	0	1	1	1	0	0	0	1	1	1	1	1	1	0	1	1	1	21
ZNF501	1	1	1	1	0	1	1	1	1	1	0	1	1	1	0	0	0	1	1	1	1	1	1	1	1	1	0	21
EMSY	1	1	1	1	1	1	1	1	0	1	0	1	1	1	0	0	0	1	1	1	1	1	1	0	1	1	1	21
MGA	1	1	0	1	1	0	1	1	0	1	0	1	1	1	0	1	0	1	1	1	1	1	1	1	1	1	1	21
HIC1	1	1	1	1	0	1	1	1	1	1	0	1	1	1	1	0	0	1	1	1	1	1	1	1	1	0	0	21
SCRT1	1	0	0	1	0	1	1	1	1	1	0	1	1	1	0	1	0	1	1	1	1	1	1	1	1	1	1	21
ZNF592	1	0	0	1	1	0	1	1	1	1	1	1	1	1	0	0	0	1	1	1	1	1	1	1	1	1	1	21
ZNF444	1	0	0	1	1	1	1	1	1	1	1	1	1	1	1	1	0	0	0	1	1	1	1	0	1	1	1	21
TCF7L2	1	0	1	1	0	1	1	1	0	1	1	1	1	1	1	1	0	1	1	0	1	1	1	1	1	0	1	21
RFX1	1	0	0	1	1	1	1	1	1	1	0	1	1	1	0	1	0	1	1	0	1	1	1	1	1	1	1	21
IRF4	1	1	1	0	0	1	1	1	1	1	1	1	1	1	0	0	0	1	1	0	1	1	1	0	1	1	1	20
ZNF316	1	1	0	1	1	1	1	1	0	1	0	1	1	1	0	0	0	1	1	1	1	1	1	0	1	1	1	20
ERF	1	1	1	1	0	0	1	1	0	1	0	1	1	1	0	0	1	1	1	1	1	1	1	0	1	1	1	20
ZNF580	1	1	1	1	1	0	1	1	1	1	0	1	1	1	0	0	0	1	1	1	1	1	1	0	1	0	1	20
OSR2	1	1	0	1	0	1	1	1	1	1	0	1	1	1	0	0	0	1	1	1	1	1	1	1	1	0	1	20
HCFC1	1	1	1	1	0	1	1	1	0	1	0	1	1	1	0	0	0	1	1	1	1	1	1	0	1	1	1	20
HOMEZ	1	1	1	1	0	1	1	1	0	1	1	1	1	1	0	0	1	1	1	1	1	0	1	0	1	0	1	20
ZBTB33	1	1	1	1	0	1	1	1	0	1	1	1	1	1	0	0	0	1	1	0	1	1	1	0	1	1	1	20
DRAP1	1	1	1	1	0	0	1	1	0	1	0	1	1	1	0	0	0	1	1	1	1	1	1	1	1	1	1	20
NRF1	1	1	1	1	1	0	0	0	0	1	0	1	1	1	1	0	0	1	1	1	1	1	1	1	1	1	1	20
ZFP37	1	1	1	1	0	1	1	1	1	1	0	1	1	1	0	0	0	1	1	1	1	1	1	1	1	0	0	20
ATF4	1	1	0	1	1	1	1	1	1	1	0	1	1	1	0	0	0	1	1	1	1	0	1	0	1	1	1	20
ATF1	1	1	1	1	1	0	1	1	0	1	0	1	1	1	0	0	0	1	1	1	1	1	1	0	1	1	1	20
MEIS2	1	1	0	1	1	1	1	1	1	1	0	1	1	1	0	0	0	1	1	0	1	1	1	0	1	1	1	20
HDAC1	1	1	1	1	1	0	1	1	0	1	0	1	1	1	0	0	0	1	1	1	1	1	1	0	1	1	1	20
ARID1B	1	1	0	1	1	1	1	1	0	1	0	1	1	1	0	0	0	1	1	1	1	1	1	0	1	1	1	20
ARID4B	1	1	1	1	0	0	1	1	0	1	0	1	1	1	0	0	0	1	1	1	1	1	1	1	1	1	1	20
PPARG	1	1	1	1	0	0	1	1	0	1	1	1	1	1	0	0	1	1	1	1	1	1	1	0	1	0	1	20
TCF7	1	1	1	1	0	1	0	0	1	1	1	1	1	1	0	1	0	1	1	1	1	1	1	0	1	0	1	20
PHF8	1	1	1	1	0	0	1	1	0	1	0	1	1	1	0	0	0	1	1	1	1	1	1	1	1	1	1	20
RBFOX2	1	1	1	1	0	0	1	1	0	1	0	1	1	1	0	0	0	1	1	1	1	1	1	1	1	1	1	20
TFE3	1	1	1	1	1	0	1	1	0	1	1	1	1	1	0	0	0	0	1	1	1	1	1	1	1	0	1	20
MYNN	1	1	0	1	1	1	1	1	0	1	0	1	1	1	0	0	0	1	1	1	1	1	1	0	1	1	1	20
TFAP4	1	1	1	1	0	0	1	1	0	1	0	1	1	1	0	1	0	1	1	1	1	1	1	1	0	1	1	20
ZNF205	1	1	1	1	0	0	1	1	0	1	0	1	1	1	0	0	0	1	1	1	1	1	1	1	1	1	1	20
ZFX	1	0	1	1	0	0	1	1	0	1	0	1	1	1	1	0	0	1	1	1	1	1	1	1	1	1	1	20
ZNF644	1	1	1	1	1	1	1	1	0	1	1	1	1	1	0	0	1	1	1	0	1	0	1	0	1	0	1	20
SP5	1	1	1	1	0	1	1	1	0	1	0	1	1	1	0	0	0	1	1	1	1	1	1	0	1	1	1	20
MTA1	1	0	1	1	1	1	1	1	0	1	0	1	1	1	0	0	0	1	1	0	1	1	1	1	1	1	1	20
HMG20A	1	1	1	1	0	0	1	1	0	1	1	1	1	1	0	0	1	1	1	1	1	0	1	0	1	1	1	20
PAX5	1	1	1	0	0	1	0	0	1	1	1	1	1	1	0	0	0	1	1	1	1	1	1	0	1	1	1	19
JUNB	1	1	0	0	1	1	1	1	1	1	1	1	1	1	0	0	0	1	1	0	1	0	1	0	1	1	1	19
NKRF	1	1	1	1	0	0	0	0	0	1	1	1	1	1	0	0	0	1	1	1	1	1	1	1	1	1	1	19
BCLAF1	1	1	1	0	0	1	0	0	0	1	1	1	1	1	0	0	0	1	1	1	1	1	1	1	1	1	1	19
ZNF48	1	1	1	1	0	0	1	1	0	1	0	1	1	1	0	0	0	1	1	0	1	1	1	1	1	1	1	19
KLF17	1	0	1	1	1	1	1	1	1	1	0	1	1	1	0	0	0	1	1	0	1	1	1	1	1	0	0	19
PRDM4	1	1	1	1	0	1	1	1	1	1	0	1	1	1	0	0	0	1	1	0	1	1	1	1	1	0	0	19
ZSCAN4	1	0	0	1	0	1	1	1	1	1	0	1	1	1	0	0	0	1	1	0	1	1	1	1	1	1	1	19
ZNF629	1	0	1	1	0	1	1	1	1	1	0	1	1	1	0	0	0	1	1	0	1	1	1	1	1	0	1	19
RCOR1	1	1	1	1	0	0	1	1	0	1	0	1	1	1	0	0	0	1	1	1	1	1	1	0	1	1	1	19
ZNF10	1	1	0	1	0	1	1	1	1	1	0	1	1	1	0	0	0	1	1	1	1	1	0	1	1	0	1	19
BRCA1	1	1	1	1	0	0	1	1	0	1	0	1	1	1	1	1	0	1	0	0	1	1	1	0	1	1	1	19
KMT2B	1	1	1	1	0	0	1	1	0	1	0	1	1	1	0	0	0	1	1	1	1	1	1	0	1	1	1	19
TAF9B	1	1	1	1	0	0	1	1	0	1	0	1	1	1	0	0	0	1	1	1	1	1	1	0	1	1	1	19
ZNF610	1	1	1	1	0	0	1	1	0	1	0	1	1	1	0	0	0	1	1	1	1	1	1	1	1	0	1	19
ZSCAN9	1	1	1	1	0	0	1	1	0	1	0	1	1	1	0	0	0	1	1	1	1	1	1	1	0	1	1	19
KLF16	1	1	1	1	1	1	0	0	1	1	0	1	1	1	0	0	0	1	1	0	1	1	1	1	1	1	0	19
MAFG	1	1	0	1	1	1	1	1	0	1	0	1	1	1	0	0	0	1	1	1	1	0	1	0	1	1	1	19
RB1	1	1	1	1	1	0	0	0	0	1	0	1	1	1	0	0	0	1	1	1	1	1	1	1	1	1	1	19
ZNF518A	1	1	1	0	0	1	1	1	1	1	0	1	1	1	0	0	0	1	1	1	1	1	1	1	1	0	0	19
GMEB1	1	1	1	1	1	0	1	1	0	1	0	1	1	0	0	0	0	1	1	1	1	1	1	0	1	1	1	19
ZNF324	1	1	1	1	0	0	1	1	1	1	0	1	1	1	0	0	0	1	1	0	1	1	1	1	1	0	1	19
MLX	1	1	1	1	0	0	1	1	0	1	1	1	1	1	0	0	0	1	1	1	1	1	1	0	0	1	1	19
TBL1XR1	1	1	1	1	1	0	0	0	1	1	0	1	1	1	0	0	0	1	1	1	1	1	1	0	1	1	1	19
ZSCAN21	1	1	0	1	0	1	1	1	1	1	0	1	1	1	0	0	0	1	1	1	1	1	1	1	1	0	0	19
DACH1	1	1	1	1	1	1	1	1	0	1	0	1	1	1	0	0	0	1	1	0	1	0	1	1	0	1	1	19
NFKBIZ	1	1	1	1	0	0	1	1	0	1	0	1	1	1	0	0	0	1	1	1	1	1	1	0	1	1	1	19
LARP7	1	1	1	1	1	0	0	0	0	1	0	1	1	1	0	0	0	1	1	1	1	1	1	1	1	1	1	19
IRF2	1	1	1	1	0	0	1	1	0	1	0	1	1	1	0	0	0	0	1	1	1	1	1	1	1	1	1	19
TFDP1	1	1	1	1	0	0	1	1	0	1	0	1	1	1	0	0	0	1	0	1	1	1	1	1	1	1	1	19
ZBTB11	1	1	1	1	0	1	1	1	0	1	0	1	1	1	0	0	0	1	1	1	1	1	1	1	1	0	0	19
NR2C1	1	1	1	1	0	0	1	1	0	1	0	1	1	1	0	0	0	1	1	1	1	1	1	0	1	1	1	19
TOE1	1	0	1	1	1	1	1	1	1	1	0	1	1	1	0	0	0	0	0	0	1	1	1	1	1	1	1	19
NANOG	1	0	0	1	0	1	0	0	1	1	1	1	1	1	1	0	1	1	1	1	1	0	1	0	1	1	1	19
ZBED1	1	1	0	1	1	1	0	0	0	1	1	1	1	1	0	0	0	1	1	1	1	1	1	0	1	1	1	19
TAL1	1	0	1	1	1	1	1	1	0	1	0	1	1	1	0	0	0	1	1	1	1	1	1	0	0	1	1	19
NFIB	0	0	1	1	0	0	1	1	1	1	0	1	1	1	1	0	0	1	1	1	1	1	1	0	1	1	1	19
POU5F1	1	0	0	1	0	1	1	1	1	0	1	1	0	1	1	1	1	0	1	1	1	0	1	1	1	0	0	18
GATA2	1	1	0	1	1	1	1	1	1	1	0	1	0	1	0	0	0	1	0	0	1	0	1	1	1	1	1	18
ZNF639	1	1	1	1	0	1	1	1	0	1	0	1	1	1	0	0	0	1	1	0	1	1	1	1	1	0	0	18
FEZF1	1	1	0	1	0	0	1	1	1	1	0	1	1	1	0	0	0	1	1	0	1	1	1	1	1	0	1	18
ZNF843	1	1	0	1	0	1	1	1	1	1	0	1	1	1	0	0	0	1	1	0	1	1	1	1	1	0	0	18
PRDM6	1	1	0	1	1	0	1	1	1	1	0	1	1	1	0	0	0	1	1	0	1	0	1	1	1	1	0	18
INSM2	1	1	1	1	0	1	1	1	0	1	0	1	1	1	0	0	0	1	1	0	1	1	1	1	1	0	0	18
ZNF18	1	1	0	1	0	1	1	1	1	1	0	1	0	1	0	0	0	1	1	0	1	1	1	1	1	1	0	18
MZF1	1	1	0	1	0	1	1	1	1	1	0	1	1	1	0	0	0	1	1	0	1	1	1	1	1	0	0	18
WT1	1	1	0	1	0	0	1	1	1	1	0	1	1	1	0	0	1	1	1	0	1	0	1	1	1	0	1	18
KLF6	1	1	1	1	0	0	1	1	0	1	0	1	1	1	0	0	0	1	1	1	1	0	1	0	1	1	1	18
CHD1	1	1	1	0	0	0	1	1	0	1	0	1	1	1	0	0	0	1	1	0	1	1	1	1	1	1	1	18
ZNF511	1	1	1	1	0	0	1	1	0	1	0	1	1	1	0	0	0	1	1	0	1	1	1	0	1	1	1	18
MIER3	1	1	1	1	0	0	1	1	0	1	0	1	1	1	0	0	0	1	1	1	1	0	1	0	1	1	1	18
NFATC3	1	1	1	1	1	0	1	1	0	1	0	1	1	1	0	0	0	1	1	1	1	1	1	0	1	0	0	18
CBFB	1	1	1	0	0	1	0	0	1	1	1	1	1	1	0	0	0	1	1	0	1	1	1	0	1	1	1	18
EP400	1	1	1	1	1	0	0	0	0	1	0	1	1	1	0	0	0	1	1	1	1	1	1	0	1	1	1	18
FOXM1	1	1	1	1	1	0	0	0	0	1	0	1	1	1	1	0	0	1	1	0	1	1	1	1	1	1	0	18
HDGF	1	1	0	1	1	1	0	0	0	1	0	1	1	1	0	0	0	1	1	1	1	1	1	0	1	1	1	18
MIER2	1	1	1	0	0	0	1	1	0	1	1	1	1	1	0	0	1	1	1	0	1	1	1	0	1	0	1	18
KDM3A	1	1	1	1	0	0	1	1	0	1	0	1	1	1	0	0	0	1	1	1	1	1	1	0	0	1	1	18
TGIF2	1	1	1	1	0	0	1	1	0	1	0	1	1	1	0	0	0	0	1	1	1	1	1	0	1	1	1	18
CBFA2T2	1	1	0	1	1	1	1	1	0	1	0	0	0	1	0	0	0	1	1	1	1	1	1	0	1	1	1	18
BCOR	1	1	1	1	1	0	0	0	0	1	0	1	1	1	0	0	0	1	1	1	1	1	1	0	1	1	1	18
AHR	1	1	1	1	0	0	1	1	0	1	0	1	1	1	0	0	0	1	1	1	1	1	1	0	1	1	0	18
AFF1	1	1	1	1	1	0	0	0	0	1	0	1	1	1	0	0	0	1	1	1	1	1	1	0	1	1	1	18
BRD9	1	1	0	1	1	0	1	1	0	1	0	1	1	1	0	0	0	1	1	1	1	1	1	0	1	1	0	18
PML	1	1	0	1	1	1	0	0	0	1	0	1	1	1	0	0	0	1	1	1	1	1	1	0	1	1	1	18
ZNF398	1	0	1	1	0	1	1	1	1	1	0	1	1	1	0	0	0	1	1	0	1	1	1	1	1	0	0	18
HMBOX1	1	0	0	1	1	0	1	1	0	1	0	1	1	1	0	0	0	1	1	1	1	1	1	0	1	1	1	18
ZBTB10	1	1	1	1	0	0	0	0	1	1	0	1	1	1	0	0	0	1	1	1	1	1	1	1	1	0	1	18
ETS1	1	1	1	1	0	0	0	0	1	1	0	1	1	1	0	0	1	1	1	1	1	1	1	0	0	1	1	18
MBD1	1	1	1	1	0	0	1	1	0	1	0	1	1	1	0	0	0	1	1	0	1	1	1	0	1	1	1	18
HBP1	1	1	1	1	0	0	1	1	0	1	0	1	1	1	0	0	0	0	1	1	1	1	1	0	1	1	1	18
TEAD4	1	0	0	1	1	1	1	1	0	1	0	1	1	1	0	0	0	1	1	0	1	1	1	0	1	1	1	18
ZNF652	1	1	0	1	1	0	1	1	0	1	0	1	0	1	0	0	0	1	1	0	1	1	1	1	1	1	1	18
KLF7	1	0	1	0	0	0	1	1	1	1	0	1	1	1	0	0	0	1	1	0	1	1	1	1	1	1	1	18
CUX1	1	0	1	1	0	1	1	1	0	1	0	1	1	1	0	0	1	1	1	0	1	0	1	1	1	0	1	18
ESRRA	1	0	0	1	1	1	1	1	0	1	0	1	1	1	0	1	0	1	0	0	1	1	1	0	1	1	1	18
EED	1	1	0	0	0	1	0	0	0	1	1	1	1	1	0	0	0	1	1	1	1	1	1	0	1	1	1	17
ETV6	1	1	1	0	0	1	0	0	0	1	1	1	1	1	0	0	0	1	1	0	1	1	1	0	1	1	1	17
RBPJ	1	1	1	1	0	0	1	1	0	1	0	1	1	1	0	0	0	0	1	0	1	1	1	0	1	1	1	17
ZEB1	1	0	1	0	0	0	1	1	1	1	0	1	1	1	0	0	0	1	1	1	1	1	1	1	1	0	0	17
ZSCAN5C	1	1	0	1	0	1	1	1	1	1	0	1	1	1	0	0	0	1	1	0	1	1	0	1	1	0	0	17
ZBTB44	1	0	0	1	0	1	1	1	1	1	0	1	1	1	1	0	0	1	1	0	1	0	1	1	1	0	0	17
MXD4	1	1	1	1	0	0	1	1	0	1	0	1	1	1	0	0	0	0	1	0	1	1	1	0	1	1	1	17
SMAD5	1	1	1	1	0	0	0	0	0	1	0	1	1	1	0	0	0	1	1	1	1	1	1	0	1	1	1	17
KAT7	1	1	1	1	0	0	1	1	0	1	0	1	1	1	0	0	0	0	1	0	1	1	1	1	1	0	1	17
ZFP91	1	1	1	1	1	1	0	0	0	1	0	1	1	1	0	0	0	1	1	0	1	1	1	0	1	0	1	17
SUPT5H	1	1	1	1	0	0	0	0	0	1	0	1	1	1	0	0	0	1	1	1	1	1	1	0	1	1	1	17
ZNF664	1	1	0	1	1	0	0	0	1	1	0	1	1	1	0	0	0	1	1	0	1	1	1	1	1	0	1	17
HMG20B	1	1	1	1	0	0	1	1	0	1	0	1	1	1	0	0	0	1	1	1	1	1	1	0	0	0	1	17
NFYC	1	1	0	1	0	0	1	1	0	1	0	1	1	1	0	0	0	0	1	1	1	1	1	0	1	1	1	17
IKZF5	1	1	1	1	0	0	1	1	0	1	0	1	1	1	0	0	0	0	1	0	1	1	1	0	1	1	1	17
GABPB1	1	1	1	1	0	0	0	0	0	1	0	1	1	1	0	0	0	1	1	1	1	1	1	0	1	1	1	17
ZKSCAN8	1	1	1	1	0	0	1	1	0	1	0	1	1	1	0	0	0	0	1	1	1	1	1	0	1	0	1	17
NFRKB	1	1	1	1	0	0	0	0	0	1	0	1	1	1	0	0	0	1	1	1	1	1	1	0	1	1	1	17
CBX3	1	1	1	1	1	0	0	0	0	1	0	1	1	1	0	0	0	1	1	0	1	1	1	0	1	1	1	17
RERE	1	1	1	1	0	0	0	0	0	1	0	1	1	1	0	1	1	1	1	1	1	1	1	0	0	0	1	17
ZBTB25	1	1	1	1	0	0	1	1	0	1	0	1	1	1	0	0	0	0	1	1	1	1	1	0	1	0	1	17
UBTF	1	1	0	1	1	0	0	0	0	1	0	1	1	1	0	0	0	1	1	1	1	1	1	0	1	1	1	17
NCOA1	1	0	1	1	1	0	1	1	0	1	0	1	1	1	0	0	0	1	1	0	1	1	1	0	1	1	0	17
HNF4G	1	0	0	1	0	1	1	1	1	1	0	1	0	1	0	0	1	1	1	1	1	0	1	0	1	0	1	17
STAT5A	1	0	0	1	1	1	0	0	0	1	1	1	1	1	0	0	0	1	1	0	1	1	1	0	1	1	1	17
NFATC1	1	1	0	0	0	1	0	0	1	1	1	1	1	1	0	0	0	1	1	0	1	0	1	0	1	1	1	16
ZNF184	1	0	0	1	0	0	1	1	0	1	0	1	1	1	0	0	0	1	1	0	1	1	1	1	1	1	0	16
ZBTB12	1	1	0	0	0	1	1	1	1	1	0	0	1	1	0	0	0	1	1	0	1	1	1	1	1	0	0	16
ZNF207	1	1	1	0	1	0	0	0	0	1	0	1	1	1	0	0	0	1	1	0	1	1	1	1	1	0	1	16
NONO	1	1	1	1	1	1	0	0	0	1	0	1	1	1	0	0	0	1	0	0	1	1	1	0	1	0	1	16
ELK1	1	1	1	0	0	0	0	0	0	1	0	1	1	1	1	0	0	1	0	1	1	1	1	0	1	1	1	16
ZMYM3	1	1	1	1	1	0	0	0	0	1	0	1	1	1	0	0	0	1	1	1	1	0	1	0	0	1	1	16
KLF11	1	1	1	0	0	0	1	1	0	1	0	1	1	1	0	0	0	0	1	0	1	1	1	0	1	1	1	16
SIN3B	1	1	1	1	0	0	0	0	0	1	0	1	1	1	0	0	0	1	1	1	1	1	1	0	1	1	0	16
SKIL	1	1	1	1	1	0	0	0	0	1	0	1	1	1	0	0	0	1	1	0	1	1	1	0	0	1	1	16
THRB	1	1	0	1	0	0	1	1	0	1	0	1	0	1	0	0	0	0	1	1	1	1	1	0	1	1	1	16
ZSCAN5A	1	1	1	0	1	1	0	0	0	1	0	1	1	1	0	0	0	1	0	1	1	1	1	1	1	0	0	16
CHAMP1	1	1	1	1	1	0	0	0	0	1	0	1	1	1	0	0	0	1	1	0	1	0	1	0	1	1	1	16
MXD3	1	1	1	1	0	0	0	0	0	1	0	1	1	1	0	0	0	0	1	0	1	1	1	1	1	1	1	16
DDX20	1	1	1	1	1	0	0	0	0	1	0	1	1	1	0	0	0	1	1	1	1	1	1	0	0	0	1	16
RCOR2	1	1	1	1	0	0	1	1	0	1	0	0	1	1	0	0	1	1	1	1	1	0	1	0	0	0	1	16
CC2D1A	1	1	0	1	1	0	0	0	0	1	0	1	1	1	0	0	0	1	1	0	1	1	1	0	1	1	1	16
ZNF777	1	1	0	0	0	0	1	1	1	1	0	1	1	1	0	0	1	1	1	0	1	1	0	1	1	0	0	16
GATA4	1	1	0	1	0	1	1	1	0	1	0	1	0	1	0	0	0	1	1	1	1	0	1	0	1	0	1	16
ZHX2	1	1	1	1	0	1	1	1	0	1	0	1	1	1	0	0	0	0	0	0	1	1	1	0	1	0	1	16
RFXANK	1	1	1	1	0	0	1	1	0	1	0	1	1	1	0	0	0	0	1	0	1	1	1	0	1	0	1	16
MEF2D	1	0	1	1	1	0	1	1	0	1	0	1	1	1	0	0	0	1	1	0	1	1	1	0	0	1	0	16
ZBTB6	0	0	0	0	0	1	1	1	1	1	0	1	1	1	0	0	0	1	1	1	1	1	1	1	1	0	0	16
GFI1B	1	1	0	0	0	0	1	1	1	1	0	1	1	1	0	0	0	1	1	0	1	0	1	1	1	0	0	15
KDM6A	1	1	1	1	0	0	1	1	0	1	1	1	0	1	0	0	0	0	1	1	1	0	1	0	0	0	1	15
CHD4	1	1	1	1	0	0	1	1	0	1	0	1	0	1	0	0	0	1	1	1	1	0	1	0	0	0	1	15
ZNF623	1	1	0	0	0	0	1	1	0	1	0	1	1	1	0	0	0	1	0	0	1	1	1	1	1	1	0	15
ASH2L	1	1	1	1	0	0	0	0	0	1	0	1	1	1	0	0	0	1	1	0	1	1	0	1	1	0	1	15
ZC3H8	1	1	1	1	1	0	0	0	0	1	0	1	1	1	0	0	0	0	1	0	1	1	1	0	1	0	1	15
DIDO1	1	1	1	1	0	0	0	0	0	1	0	1	1	1	0	0	0	1	1	0	1	1	1	0	1	0	1	15
ZNF3	1	1	0	0	0	0	1	1	0	1	0	1	1	1	0	0	0	0	1	1	1	1	1	0	1	0	1	15
KLF5	1	1	1	0	0	0	0	0	0	1	0	1	1	1	0	0	0	1	1	0	1	1	1	1	1	0	1	15
HNF1A	1	1	0	1	0	1	0	0	0	1	1	1	1	1	0	0	0	0	1	1	1	1	1	0	0	0	1	15
PHF21A	1	1	0	1	0	0	0	0	0	1	0	1	1	1	0	0	0	0	1	1	1	1	1	0	1	1	1	15
HNRNPL	1	1	0	1	0	0	0	0	0	1	0	1	1	1	0	0	0	1	1	0	1	1	1	0	1	1	1	15
POLR2B	1	1	0	1	0	0	0	0	0	1	0	1	1	1	0	0	0	0	1	1	1	1	1	0	1	1	1	15
ZBTB2	1	1	0	1	1	0	0	0	0	1	0	1	1	1	0	0	0	0	1	0	1	1	1	0	1	1	1	15
BCL11B	1	0	0	1	0	0	1	1	0	1	0	1	1	1	0	0	0	1	1	0	1	1	1	1	1	0	0	15
ZNF146	1	0	1	0	0	1	0	0	1	1	0	1	1	1	0	0	0	1	1	1	1	1	1	0	1	0	0	15
DEK	0	0	1	1	1	0	1	1	0	1	0	1	1	1	0	1	0	1	0	0	1	0	1	0	1	0	1	15
ZHX1	0	0	1	1	0	0	1	1	0	1	0	1	1	1	1	1	0	0	0	0	1	1	1	1	1	0	0	15
EHMT2	0	0	0	1	1	1	1	1	0	1	0	1	1	1	0	0	0	1	1	0	1	1	1	0	1	0	0	15
ZNF579	0	0	0	1	0	0	1	1	0	1	1	1	1	1	0	1	0	0	0	0	1	1	1	0	1	1	1	15
ZBTB21	0	0	0	0	0	1	1	1	1	1	0	1	1	1	0	0	0	1	0	0	1	1	1	1	1	0	1	15
ZSCAN23	1	0	1	0	0	0	0	0	1	1	0	1	1	1	0	0	0	1	0	0	1	1	1	1	1	0	1	14
TSHZ1	1	0	0	0	0	0	1	1	1	1	0	1	1	1	0	0	0	1	1	0	1	0	1	1	1	0	0	14
DNMT3B	1	1	0	0	0	0	1	1	0	1	0	1	0	1	0	0	1	0	1	0	1	1	1	0	1	0	1	14
HES1	1	1	0	1	1	0	0	0	0	1	0	1	1	0	0	0	0	0	1	0	1	1	1	0	1	1	1	14
SSRP1	1	1	0	1	0	0	1	1	0	1	0	1	1	1	0	0	0	0	1	0	1	1	1	0	0	0	1	14
ZFP64	1	1	1	1	0	0	0	0	0	1	0	1	1	1	0	0	0	0	1	0	1	1	1	0	1	0	1	14
ZNF318	1	1	0	1	0	0	1	1	0	1	0	1	1	1	0	0	0	0	1	0	1	0	1	0	0	1	1	14
TAF7	1	1	1	1	0	0	0	0	0	1	0	1	1	1	0	0	0	0	1	0	1	1	1	0	1	0	1	14
RLF	1	1	1	1	0	0	0	0	0	0	0	1	1	0	0	0	0	1	1	1	1	1	1	0	1	0	1	14
PHF20	1	1	1	1	0	0	0	0	0	1	0	1	1	1	0	0	0	0	1	1	1	1	1	0	1	0	0	14
ELF4	1	1	0	0	0	0	0	0	0	1	0	1	1	0	1	0	0	1	1	0	1	1	1	1	1	1	0	14
ZNF558	1	0	0	0	0	0	1	1	1	1	0	1	1	1	0	0	0	1	1	0	1	0	1	1	1	0	0	14
SREBF1	1	0	1	1	0	0	0	0	0	1	0	1	1	1	0	1	0	0	0	1	1	1	1	0	0	1	1	14
GLI4	1	0	0	1	0	0	1	1	0	1	0	1	1	1	0	0	0	1	1	0	1	1	0	1	1	0	0	14
PBX2	1	1	0	1	0	1	0	0	0	1	0	1	0	1	0	0	0	0	1	1	1	1	1	0	1	0	1	14
ZNF133	1	0	0	1	1	1	1	1	1	1	0	1	1	1	0	0	0	1	0	0	0	1	0	0	1	0	0	14
ZNF512B	0	0	0	0	1	1	1	1	1	1	0	1	1	1	0	0	0	0	1	0	1	0	1	0	1	0	1	14
RBM22	1	1	1	1	0	0	0	0	0	1	0	1	1	1	0	0	0	0	1	0	1	1	1	0	0	0	1	13
ZNF121	1	1	0	0	0	0	1	1	0	1	0	1	1	1	0	0	0	1	0	0	1	1	1	0	1	0	0	13
BCL6B	1	0	0	0	0	1	1	1	0	1	0	1	1	1	0	0	0	1	1	0	1	0	0	0	1	1	0	13
ZNF423	1	1	0	0	0	1	0	0	1	1	0	1	0	1	1	0	0	0	0	0	1	1	1	1	1	0	0	13
OVOL3	1	1	0	0	0	1	0	0	0	1	0	1	1	1	0	0	0	1	1	0	1	1	1	0	1	0	0	13
HLTF	1	1	0	1	1	0	0	0	0	1	0	1	1	1	0	0	0	0	1	0	1	1	1	0	1	0	0	13
E2F4	1	1	1	0	0	0	0	0	0	1	0	1	1	1	0	0	0	1	0	1	1	0	1	0	1	0	1	13
ZNF512	1	1	0	1	0	0	0	0	0	1	0	1	1	1	0	0	0	1	1	0	1	0	1	1	1	0	0	13
RFX3	1	1	0	1	0	0	1	1	0	1	0	1	1	0	0	0	0	0	0	0	1	1	1	0	1	0	1	13
E2F1	1	1	1	0	0	0	0	0	0	1	0	1	1	1	0	0	0	0	0	1	1	1	1	0	1	0	1	13
LCORL	1	1	1	1	0	0	0	0	0	1	1	1	0	1	0	0	0	1	0	1	1	0	1	0	0	0	1	13
GATA3	1	0	1	1	0	1	1	1	0	1	0	0	0	1	0	1	0	1	0	0	0	0	1	0	1	0	1	13
HHEX	1	1	0	1	0	0	0	0	0	1	0	1	0	1	0	1	0	0	1	1	1	1	1	0	0	0	1	13
PHB2	1	0	1	1	1	0	0	0	0	1	0	1	1	1	0	0	0	1	1	0	1	1	1	0	0	0	0	13
ARID2	1	0	0	0	0	1	0	0	0	1	0	1	1	1	0	0	0	1	1	0	1	1	1	0	0	1	1	13
PAX8	0	0	1	0	0	1	1	1	0	1	1	1	1	1	0	0	0	1	1	0	1	0	1	0	0	0	0	13
TEAD2	0	0	0	1	0	0	1	1	0	1	0	1	1	1	0	0	0	1	1	0	1	1	1	0	0	1	0	13
ZSCAN16	0	0	0	0	0	1	1	1	1	1	0	1	1	1	0	0	0	1	1	0	1	1	0	0	1	0	0	13
YY2	1	1	1	1	0	0	0	0	0	1	0	1	1	1	0	0	0	1	0	0	1	1	0	0	1	0	0	12
CBX1	1	1	0	1	0	0	0	0	0	1	0	1	1	1	0	0	0	0	0	0	1	1	1	0	1	0	1	12
ZNF7	1	1	0	0	0	0	0	0	0	1	0	1	1	1	0	0	0	0	1	0	1	1	1	0	0	1	1	12
MIER1	1	1	1	0	0	0	0	0	0	1	0	1	0	1	0	0	0	0	1	1	1	1	1	0	0	0	1	12
KDM4B	1	0	0	0	0	0	0	0	0	1	0	1	1	1	0	0	0	1	0	1	1	1	1	0	1	0	1	12
TBX3	1	1	1	0	0	0	0	0	0	1	0	0	0	0	0	0	1	0	1	1	1	1	1	0	0	1	1	12
ZNF513	1	0	0	0	0	0	0	0	0	1	0	1	1	1	0	0	0	1	1	0	1	1	1	1	1	0	0	12
STAT1	0	0	1	0	0	0	0	0	0	1	0	1	1	1	0	0	0	1	0	1	1	1	1	0	0	1	1	12
IRF9	0	0	0	1	0	0	0	0	0	1	0	1	0	1	0	0	0	1	1	0	1	1	1	0	1	1	1	12
NCOA3	0	0	0	0	1	1	1	1	0	1	0	1	0	1	0	0	1	1	0	0	1	0	1	0	1	0	0	12
ZFP36	0	0	0	0	0	1	0	0	0	1	0	1	1	1	1	1	0	0	0	0	1	1	1	0	1	1	0	12
ZBTB1	0	0	0	0	0	0	1	1	0	1	0	1	1	1	0	0	0	1	1	0	1	0	1	1	1	0	0	12
MCM7	1	1	0	1	1	0	0	0	0	1	0	0	1	1	0	0	0	0	1	0	1	1	1	0	0	0	0	11
RUNX1	1	0	0	1	0	0	0	0	0	1	0	1	1	1	0	0	0	0	1	0	1	1	1	0	0	1	0	11
SAFB	1	0	1	1	0	0	0	0	0	1	0	1	0	1	0	0	0	0	1	0	0	1	1	0	0	1	1	11
CSDE1	1	0	1	0	0	0	0	0	0	1	0	1	1	1	0	0	0	0	1	0	1	1	1	0	0	0	1	11
GTF2A2	1	0	1	0	0	0	0	0	0	1	0	1	1	1	0	0	0	0	1	1	1	1	1	0	0	0	0	11
YBX1	1	0	1	0	0	0	0	0	0	1	1	1	0	1	0	0	0	1	0	0	1	1	1	0	0	0	1	11
TRIM25	0	0	1	0	0	0	0	0	0	1	0	1	1	1	0	0	0	0	1	1	1	1	1	0	0	0	1	11
ZBTB5	0	0	1	0	0	0	0	0	0	1	0	1	1	1	0	0	0	0	1	0	1	1	1	0	0	1	1	11
KDM5A	0	0	1	1	0	0	0	0	0	1	0	1	1	1	0	0	0	0	0	1	1	1	1	0	1	0	0	11
ZBTB7A	0	0	0	1	0	0	0	0	1	1	0	1	1	1	0	0	0	1	0	0	1	1	0	0	1	0	1	11
ZNF785	0	0	0	0	0	1	1	1	0	1	0	1	1	1	0	0	0	1	0	0	1	1	0	0	1	0	0	11
SREBF2	0	0	0	0	0	0	0	0	0	1	0	1	1	1	1	0	0	0	0	1	1	1	1	0	1	1	0	11
ZNF280D	1	1	1	0	0	0	0	0	0	1	0	1	0	1	0	0	0	0	0	0	1	1	1	0	1	0	0	10
IRF3	1	1	1	0	0	0	0	0	0	1	0	1	1	1	0	0	0	0	0	1	0	1	0	0	0	1	0	10
GMEB2	1	1	0	1	0	0	0	0	0	1	0	1	1	1	0	0	0	0	0	0	1	1	0	0	0	0	1	10
ZNF680	1	1	0	0	0	0	1	1	0	1	0	0	0	1	0	0	0	0	1	0	0	0	1	0	1	0	1	10
PYGO2	1	0	1	0	0	0	0	0	0	1	0	1	0	1	0	0	0	0	1	1	1	1	1	0	0	0	0	10
U2AF1	1	1	1	0	0	0	0	0	0	1	0	1	1	1	0	0	0	0	0	0	1	0	1	0	1	0	0	10
NFXL1	1	0	1	0	0	0	0	0	0	1	0	1	1	1	0	0	0	0	0	0	1	0	1	1	0	1	0	10
SMARCC2	1	1	0	1	0	0	0	0	0	1	0	1	0	1	0	0	1	0	1	1	0	0	1	0	0	0	0	10
KHSRP	1	0	0	1	1	0	0	0	0	1	0	1	1	1	0	0	0	0	1	0	1	0	1	0	0	0	0	10
CBLL2	1	0	0	0	0	0	0	0	0	1	0	1	1	1	0	0	0	1	0	1	1	1	0	0	1	0	0	10
ZC3H11A	1	0	0	0	1	0	0	0	0	0	0	1	1	1	0	0	0	1	0	0	1	1	1	0	1	0	0	10
ZNF768	0	0	0	1	0	0	1	1	0	1	0	0	0	1	1	0	0	0	0	0	0	1	1	1	1	0	0	10
SUZ12	0	0	0	0	1	1	0	0	0	1	0	1	1	1	0	0	0	0	0	0	1	1	1	0	0	1	0	10
ZNF547	0	0	0	0	0	0	1	1	1	1	0	1	1	1	0	0	0	0	0	1	0	0	1	0	1	0	0	10
RBAK	0	0	0	0	0	0	1	1	1	1	0	1	0	1	0	0	0	0	0	1	1	1	1	0	0	0	0	10
ZNF740	0	0	0	0	0	0	0	0	0	1	0	1	0	1	0	0	0	1	1	0	1	1	1	0	0	1	1	10
THRAP3	1	1	0	0	0	0	0	0	0	1	0	1	1	1	0	0	0	1	0	0	1	0	1	0	0	0	0	9
ZNF837	1	1	0	0	0	0	0	0	0	1	0	1	1	1	0	0	0	0	0	1	1	0	0	1	0	0	0	9
THRA	1	1	0	1	1	0	0	0	0	1	0	0	0	1	0	0	0	0	1	0	0	0	1	0	0	1	0	9
NR3C1	1	0	0	1	1	0	0	0	0	1	0	0	1	0	0	0	0	0	1	0	1	1	1	0	0	0	0	9
CAVIN1	1	0	1	1	0	0	0	0	0	1	0	0	0	1	0	0	0	1	1	0	1	0	1	0	0	0	0	9
ZNF169	1	0	0	0	0	1	1	1	0	1	0	0	0	1	0	0	0	0	0	0	1	1	0	1	0	0	0	9
ZSCAN18	0	0	1	0	0	1	0	0	0	1	0	1	1	1	0	0	0	0	0	0	1	1	0	0	1	0	0	9
CBX5	0	0	1	0	0	0	0	0	0	0	0	1	1	1	0	0	0	1	1	0	1	1	1	0	0	0	0	9
ZNF354B	0	0	0	1	0	0	0	0	0	1	0	1	0	1	0	0	0	1	1	1	1	0	0	0	1	0	0	9
ZBTB7B	0	0	0	0	1	0	1	1	0	1	0	1	1	0	0	0	0	0	0	0	1	1	1	0	0	0	0	9
ZNF239	0	0	0	0	1	0	0	0	0	1	0	1	0	1	0	0	0	0	1	1	0	1	0	1	1	0	0	9
ZNF548	0	0	0	0	0	0	1	1	0	1	0	1	1	1	0	0	0	0	0	0	1	0	1	0	1	0	0	9
REPIN1	0	0	0	0	0	0	0	0	0	1	0	1	1	1	0	0	0	0	1	0	1	1	0	1	1	0	0	9
PTBP1	1	1	0	0	0	0	0	0	0	1	0	1	1	1	0	0	0	0	0	0	1	0	1	0	0	0	0	8
RBM39	1	0	0	0	0	0	0	0	0	1	0	1	1	1	0	0	0	0	0	0	1	1	1	0	0	0	0	8
ZFP3	1	0	0	0	0	0	0	0	0	0	0	0	0	1	0	0	0	1	1	0	1	1	1	0	1	0	0	8
ZNF350	1	0	0	0	0	0	0	0	0	0	0	1	1	1	0	0	0	1	1	1	1	0	0	0	0	0	0	8
NCOA2	1	0	0	0	1	0	0	0	0	0	0	0	0	0	0	0	0	1	1	0	1	0	1	0	0	1	1	8
ZNF140	1	0	0	0	0	0	1	1	0	0	0	1	0	1	0	0	0	0	0	1	0	0	1	0	1	0	0	8
U2AF2	0	0	1	0	0	0	0	0	0	1	0	0	1	1	0	0	0	0	0	0	1	1	1	0	0	0	1	8
SIX4	0	0	1	0	0	0	1	1	0	1	0	0	0	1	0	0	0	0	0	0	1	0	1	0	0	0	1	8
PPP1R10	0	0	1	0	0	0	1	1	0	1	0	0	1	1	0	0	0	0	0	0	1	0	1	0	0	0	0	8
DNMT1	0	0	1	0	0	0	0	0	0	1	0	1	1	1	0	0	0	0	0	0	1	1	1	0	0	0	0	8
CDC5L	0	0	0	1	0	0	0	0	0	1	0	1	1	1	0	0	0	0	0	0	1	1	1	0	0	0	0	8
NCOA6	0	0	0	0	1	0	0	0	0	1	0	1	0	0	0	0	0	0	1	0	1	1	1	0	0	0	1	8
ZNF585B	0	0	0	0	0	1	0	0	1	1	0	1	0	1	0	0	0	0	1	0	0	1	0	0	1	0	0	8
ZSCAN26	0	0	0	0	0	1	1	1	0	1	0	0	0	1	0	0	0	0	0	0	1	1	0	1	0	0	0	8
ZNF37A	0	0	0	0	0	1	0	0	0	0	0	0	1	1	0	0	0	1	1	0	1	1	0	0	1	0	0	8
ZNF223	0	0	0	0	0	0	1	1	0	1	0	1	0	1	0	0	0	0	0	0	0	1	1	1	0	0	0	8
E4F1	0	0	0	0	0	0	0	0	0	1	0	1	1	0	0	0	0	0	0	0	1	1	1	0	1	0	1	8
ZNF791	0	0	0	0	0	0	0	0	0	1	0	1	0	1	0	0	0	0	0	1	1	0	1	1	1	0	0	8
SNIP1	0	0	0	0	0	0	0	0	0	1	0	1	1	1	0	0	0	0	0	0	1	1	1	0	1	0	0	8
ZNF488	0	0	0	0	0	0	0	0	0	1	0	1	0	1	0	0	0	1	1	0	1	0	1	0	1	0	0	8
ZNF707	0	0	0	0	0	0	0	0	0	1	0	1	1	1	0	0	0	0	0	1	0	1	0	1	1	0	0	8
HNRNPH1	1	1	1	0	0	0	0	0	0	1	0	0	0	0	0	0	0	0	0	0	0	1	1	0	1	0	0	7
ATM	1	1	0	0	0	0	0	0	0	1	1	1	0	1	0	0	0	0	1	0	0	0	0	0	0	0	0	7
PAF1	1	1	1	0	0	0	0	0	0	1	0	0	0	0	0	0	0	0	1	0	0	1	1	0	0	0	0	7
HNRNPUL1	1	1	0	0	0	0	0	0	0	0	0	1	1	1	0	0	0	0	0	0	1	0	1	0	0	0	0	7
MYRF	1	0	1	0	0	0	0	0	0	1	0	0	1	0	0	0	0	0	0	0	1	0	1	0	0	1	0	7
ZNF174	1	0	0	0	0	0	1	1	0	0	0	1	0	1	0	0	0	1	1	0	0	0	0	0	0	0	0	7
KAT2B	0	0	1	0	0	0	0	0	0	0	0	1	1	1	0	0	0	1	0	1	0	0	1	0	0	0	0	7
SIX5	0	0	1	0	0	0	0	0	0	1	0	1	0	1	0	0	0	0	0	0	1	1	0	0	0	1	0	7
ZNF148	0	0	1	0	0	1	0	0	0	1	0	0	0	1	0	0	0	1	0	0	1	0	0	0	1	0	0	7
ZNF138	0	0	1	0	0	0	0	0	0	1	0	0	0	1	0	0	0	0	1	0	0	1	1	0	1	0	0	7
MCM2	0	0	0	1	0	0	0	0	0	1	0	0	0	1	0	1	0	0	0	0	1	1	1	0	0	0	0	7
CBX2	0	0	0	0	0	0	1	1	0	1	0	0	0	1	0	0	0	0	1	0	0	0	1	0	1	0	0	7
ZNF624	0	0	0	0	0	0	0	0	1	0	0	1	1	1	0	0	0	0	0	0	1	0	0	1	1	0	0	7
ARHGAP35	0	0	0	0	0	0	0	0	0	1	0	1	1	1	0	0	0	0	0	0	1	1	1	0	0	0	0	7
YBX3	0	0	0	0	0	0	0	0	0	1	0	1	1	1	0	0	0	0	0	0	1	1	1	0	0	0	0	7
DEAF1	0	0	0	0	0	0	0	0	0	1	0	1	0	1	0	0	0	0	0	0	1	1	0	0	1	0	1	7
RBBP5	1	1	0	0	0	0	0	0	0	0	0	0	1	1	0	0	0	1	0	0	1	0	0	0	0	0	0	6
ZZZ3	1	0	0	0	1	0	0	0	0	0	0	0	0	1	0	0	0	0	0	0	1	1	1	0	0	0	0	6
ZNF202	1	0	0	0	0	0	0	0	0	0	0	1	0	1	0	0	0	0	0	0	0	0	1	1	1	0	0	6
CBX8	0	0	1	0	0	1	0	0	0	1	0	1	0	1	0	0	0	0	0	0	0	0	0	0	1	0	0	6
NUFIP1	0	0	1	1	0	0	0	0	0	0	0	0	0	0	0	0	0	0	1	0	1	1	0	0	1	0	0	6
FUS	0	0	1	0	0	0	0	0	0	0	0	1	1	1	0	0	0	0	0	0	1	0	1	0	0	0	0	6
ZNF8	0	0	0	0	0	1	0	0	0	1	0	0	1	0	0	0	0	0	0	0	1	0	1	0	1	0	0	6
ZNF221	0	0	0	0	0	0	1	1	0	0	0	1	0	1	0	0	0	0	1	0	0	0	0	0	1	0	0	6
HSF1	0	0	0	0	0	0	0	0	0	1	0	1	0	1	0	0	0	0	1	0	1	0	1	0	0	0	0	6
E2F8	0	0	0	0	0	0	0	0	0	1	0	1	1	1	0	0	0	0	0	0	1	0	1	0	0	0	0	6
SRF	0	0	0	0	0	0	0	0	0	1	0	1	0	1	0	0	0	0	0	0	1	1	1	0	0	0	0	6
ZNF416	0	0	0	0	0	0	0	0	0	1	0	1	1	1	0	0	0	0	0	0	1	1	0	0	0	0	0	6
ZNF530	0	0	0	0	0	0	0	0	0	0	0	1	0	0	0	0	0	0	0	1	0	1	1	1	1	0	0	6
E2F7	0	0	0	0	0	0	0	0	0	0	0	1	0	1	0	0	0	0	0	0	1	1	1	0	0	0	1	6
ZNF701	0	0	0	0	0	0	0	0	0	0	0	0	0	1	0	0	0	1	0	0	1	1	0	1	1	0	0	6
AEBP2	0	0	0	0	0	0	0	0	0	0	0	0	0	0	0	0	0	0	1	1	1	1	0	1	1	0	0	6
CEBPZ	1	1	0	0	0	0	0	0	0	0	0	1	0	1	0	0	0	0	0	1	0	0	0	0	0	0	0	5
TSC22D4	1	0	0	0	0	0	1	1	0	0	0	0	0	1	0	0	0	0	0	0	1	0	0	0	0	0	0	5
ZNF274	0	0	1	0	0	0	0	0	0	0	0	0	0	1	0	0	0	1	0	1	1	0	0	0	0	0	0	5
COPS2	0	0	1	0	0	0	0	0	0	1	0	0	0	1	0	0	0	0	0	0	1	0	1	0	0	0	0	5
ZNF132	0	0	0	0	0	0	1	1	0	0	0	1	0	1	0	0	0	1	0	0	0	0	0	0	0	0	0	5
ZNF266	0	0	0	0	0	0	1	1	0	0	0	0	0	0	0	0	0	0	0	1	0	0	1	0	1	0	0	5
ZNF16	0	0	0	0	0	0	0	0	1	1	0	0	0	1	0	0	0	0	0	1	0	1	0	0	0	0	0	5
NCOA4	0	0	0	0	0	0	0	0	0	1	0	0	0	1	0	0	0	0	0	0	1	1	1	0	0	0	0	5
IRF5	0	0	0	0	0	0	0	0	0	1	0	1	1	1	0	0	0	0	0	0	0	1	0	0	0	0	0	5
ZNF302	1	0	0	0	0	0	0	0	0	0	0	0	0	1	0	0	0	0	0	1	0	1	0	0	0	0	0	4
ZNF776	1	0	0	0	0	0	0	0	0	0	0	0	0	1	0	0	0	1	0	0	1	0	0	0	0	0	0	4
ZNF704	0	0	0	0	0	1	0	0	0	0	0	1	0	0	0	0	0	0	0	0	1	0	0	0	1	0	0	4
ZNF507	0	0	0	0	0	0	0	0	0	1	0	0	0	1	0	0	0	1	0	0	1	0	0	0	0	0	0	4
ZNF114	0	0	0	0	0	0	0	0	0	1	0	1	0	1	0	0	0	1	0	0	0	0	0	0	0	0	0	4
ZNF544	0	0	0	0	0	0	0	0	0	1	0	0	0	1	0	0	0	1	1	0	0	0	0	0	0	0	0	4
ZNF514	0	0	0	0	0	0	0	0	0	1	0	0	0	1	0	0	0	0	0	1	0	0	0	0	1	0	0	4
ZNF404	0	0	0	0	0	0	0	0	0	1	0	1	0	1	0	0	0	0	0	0	0	0	0	0	1	0	0	4
ZNF26	0	0	0	0	0	0	0	0	0	0	0	1	0	1	0	0	0	0	0	0	1	0	1	0	0	0	0	4
ZNF157	0	0	0	0	0	0	0	0	0	0	0	1	0	1	0	0	0	0	0	0	0	0	0	1	1	0	0	4
ZNF433	0	0	0	0	0	0	0	0	0	0	0	0	0	1	0	0	0	0	0	0	1	0	1	0	1	0	0	4
ZNF626	0	0	0	0	0	0	0	0	0	0	0	0	0	1	0	0	0	1	0	0	0	1	0	0	1	0	0	4
ZNF282	1	0	0	0	0	0	0	0	0	1	1	0	0	0	0	0	0	0	0	0	0	0	0	0	0	0	0	3
ZNF521	1	0	0	0	0	0	0	0	0	0	0	0	0	1	0	0	0	0	0	0	0	0	0	0	1	0	0	3
ZNF311	0	0	0	0	0	0	0	0	0	1	0	0	0	1	0	0	0	0	0	0	1	0	0	0	0	0	0	3
ZNF571	0	0	0	0	0	0	0	0	0	1	0	0	0	1	0	0	0	1	0	0	0	0	0	0	0	0	0	3
ZNF23	0	0	0	0	0	0	0	0	0	1	0	0	0	0	0	0	0	0	0	0	1	1	0	0	0	0	0	3
ZNF473	0	0	0	0	0	0	0	0	0	1	0	0	0	1	0	0	0	0	0	0	1	0	0	0	0	0	0	3
ZNF560	0	0	0	0	0	0	0	0	0	0	0	1	0	0	0	0	0	0	0	0	0	0	1	0	1	0	0	3
ZNF658	0	0	0	0	0	0	0	0	0	0	0	1	0	1	0	0	0	0	0	0	1	0	0	0	0	0	0	3
CCAR2	0	0	0	0	0	0	0	0	0	0	0	1	0	1	0	0	0	0	0	0	1	0	0	0	0	0	0	3
SNRNP70	0	0	0	0	0	0	0	0	0	0	0	1	1	1	0	0	0	0	0	0	0	0	0	0	0	0	0	3
ZNF175	0	0	0	0	0	0	0	0	0	0	0	1	0	1	0	0	0	0	0	0	0	1	0	0	0	0	0	3
ZNF747	0	0	0	0	0	0	0	0	0	0	0	0	0	1	0	0	0	0	0	0	1	1	0	0	0	0	0	3
ZBTB49	0	0	0	0	0	0	0	0	0	0	0	0	0	1	0	0	0	0	0	0	1	1	0	0	0	0	0	3
PLRG1	0	0	0	0	0	0	0	0	0	1	0	0	0	1	0	0	0	0	0	0	0	0	0	0	0	0	0	2
ZNF248	0	0	0	0	0	0	0	0	0	1	0	0	0	1	0	0	0	0	0	0	0	0	0	0	0	0	0	2
ZNF155	0	0	0	0	0	0	0	0	0	1	0	0	1	0	0	0	0	0	0	0	0	0	0	0	0	0	0	2
ZNF622	0	0	0	0	0	0	0	0	0	0	0	1	0	1	0	0	0	0	0	0	0	0	0	0	0	0	0	2
PRDM2	0	0	0	0	0	0	0	0	0	0	0	0	1	1	0	0	0	0	0	0	0	0	0	0	0	0	0	2
ZNF112	0	0	0	0	0	0	0	0	0	0	0	0	0	1	0	0	0	1	0	0	0	0	0	0	0	0	0	2
ZNF670	0	0	0	0	0	0	0	0	0	0	0	0	0	1	0	0	0	0	0	0	1	0	0	0	0	0	0	2
ZNF621	0	0	0	0	0	0	0	0	0	0	0	0	0	1	0	0	0	0	0	0	0	0	0	0	1	0	0	2
MCM3	0	0	0	0	0	0	0	0	0	0	0	0	0	1	0	0	0	0	0	0	1	0	0	0	0	0	0	2
MCM5	0	0	0	0	0	0	0	0	0	0	0	0	0	1	0	0	0	0	0	0	1	0	0	0	0	0	0	2
ZFP41	0	0	0	0	0	0	0	0	0	0	0	0	0	0	0	0	0	0	0	0	0	1	0	1	0	0	0	2
ZNF19	0	0	0	0	0	0	0	0	0	0	0	0	0	0	0	0	0	0	0	0	0	0	1	0	1	0	0	2
SFPQ	0	0	0	0	0	0	0	0	0	0	0	0	1	0	0	0	0	0	0	0	0	0	0	0	0	0	0	1
XRCC3	0	0	0	0	0	0	0	0	0	0	0	0	0	1	0	0	0	0	0	0	0	0	0	0	0	0	0	1
ZNF211	0	0	0	0	0	0	0	0	0	0	0	0	0	1	0	0	0	0	0	0	0	0	0	0	0	0	0	1
POLR3G	0	0	0	0	0	0	0	0	0	0	0	0	0	0	0	0	0	0	0	0	1	0	0	0	0	0	0	1
	417	345	315	351	192	239	317	317	174	477	129	465	423	505	73	72	103	367	394	289	478	409	452	219	408	282	340
