# Supplementary material for: A mouse systems genetics approach reveals common and uncommon genetic modifiers of hepatic lysosomal enzyme activities and glycosphingolipids
Source: Research Square preprint supplement (doi:10.21203/rs.3.rs-2362074/v1), 2022-12-28
Supplement: Supplementary file 2 [file 6c5a720f8c2399b0f59e0ea2.xlsx]

## Sheet: biological numbers
Extended Data Table 1| Livers mouse numbers by traits.
Strain	Acid-β-glucosidase	α-galactosidase A	α-galactosidase B	β-Hexosaminidase A	β-Hexosaminidase B	α-glucosidase	β-D-galactosidase	α-neuraminidase	chitotriosidase	α-L-Fucosidase	tartrate-resistant acid phosphatase	lysosomal acid phosphatase	GSLs
129X1/SvJ	5	5	5	5	5	5	5	5	5	5	5	5	5
A/J	5	5	5	5	5	5	5	5	5	5	5	5	3
AKR/J	5	5	5	5	5	5	5	5	5	5	5	5	5
BALB/cJ	5	5	5	5	5	5	5	5	5	5	5	5	4
BTBR T<+> tf/J	5	5	5	5	5	5	5	5	5	5	5	5	3
BUB/BnJ	3	3	3	3	3	3	3	3	3	3	3	3	*
C57BL/6J	5	5	5	5	5	5	5	5	5	5	5	5	3
C58/J	5	5	5	5	5	5	5	5	5	5	5	5	4
CAST/EiJ	3	3	3	3	3	3	3	3	3	3	3	3	*
CBA/J	5	5	5	5	5	5	5	5	5	5	5	5	4
CE/J	5	5	5	5	5	5	5	5	5	5	5	5	5
DBA/2J	5	5	5	5	5	5	4	4	4	4	4	4	3
KK/HlJ	3	3	3	3	3	3	3	3	3	3	3	3	3
LG/J	5	4	4	4	4	4	4	4	4	4	4	4	5
LP/J	3	3	3	3	3	3	3	3	3	3	3	3	4
MA/MyJ	3	3	3	3	3	3	3	3	3	3	3	3	4
NOD/ShiLtJ	5	5	5	5	5	5	5	5	5	5	5	5	5
NON/ShiLtJ	5	5	5	5	5	5	5	5	5	5	5	5	6
NZB/BlNJ	5	5	5	5	5	5	5	5	5	5	5	5	3
NZW/LacJ	5	5	5	5	5	5	5	5	5	5	5	5	6
PL/J	5	5	5	5	5	5	5	5	5	5	5	5	4
RIIIS/J	3	3	3	3	3	3	3	3	3	3	3	3	3
SEA/GnJ	5	5	5	5	5	5	5	5	5	5	5	5	5
SM/J	5	5	5	5	5	5	5	5	5	5	5	5	4
SWR/J	5	5	5	5	5	5	5	5	5	5	5	5	6
* Less than 3 liver by strains
