# Supplementary material for: A mouse systems genetics approach reveals common and uncommon genetic modifiers of hepatic lysosomal enzyme activities and glycosphingolipids
Source: Research Square preprint supplement (doi:10.21203/rs.3.rs-2362074/v1), 2022-12-28
Supplement: Supplementary file 3 [file 7aad13a84be40cc007e6c0ba.xlsx]

## Sheet: GCase
	p value	Gene	Func_gene	Chr	Start	MA/MyJ	CBA/J	A/J	NON/LtJ	KK/HlJ	129X1/SvJ	RIIIS/J	BALB/cJ	CE/J	LP/J	NZW/LacJ	DBA/2J	SWR/J	C57BL/6J	NZB/BlNJ	SM/J	BTBR_T+_tf/J	AKR/J	PL/J	SEA/GnJ	NOD/LtJ	LG/J	CAST/EiJ	BUB/BnJ	C58/J
	7.46036e-07	Dmrtc2	UTR3	7	25662483	a	a	A	a	A	a	a	a	a	a	A	A	a	A	a	a	A	A	a	a	G	g	G	g	g
	7.46036e-07	Arhgef1	UTR3	7	25711350	g	g	G	g	G	g	g	g	g	g	G	G	g	G	g	g	G	G	g	g	T	t	T	t	t
	Mean specific activity (nmol.mg.hour)					20.73	23.74	25.72	26.24	26.67	27.28	27.63	27.82	27.82	29.1	29.66	29.94	30.06	30.16	30.18	30.28	31.68	32.4	32.7	33.4	34.96	36.25	38.6	39.3	40.08

## Sheet: GalA
	p value	Gene	Func_gene	Chr	Start	LG/J	NZW/LacJ	CBA/J	C57BL/6J	A/J	KK/HlJ	BTBR_T+_tf/J	DBA/2J	CE/J	SM/J	RIIIS/J	NZB/BlNJ	PL/J	AKR/J	NON/LtJ	LP/J	BALB/cJ	NOD/LtJ	BUB/BnJ	129X1/SvJ	SWR/J	SEA/GnJ	CAST/EiJ	C58/J	MA/MyJ
	2.88201e-06	Stard4	intergenic	18	33494519	c	C	c	C	C	C	C	C	t	c	c	c	t	T	t	c	t	T	t	t	t	t	T	t	t
	Mean specific activity (nmol.mg.hour)					16.25	18.4	18.8	20.8	21.4	22.67	23.6	24.8	25.2	25.2	26.33	27	27.2	28	29.4	29.33	30.4	30.6	31.33	32.8	34.4	35	35.33	37.6	38.33

## Sheet: GalB
	p value	Gene	Func_gene	Chr	Start	RIIIS/J	A/J	MA/MyJ	SEA/GnJ	NON/LtJ	DBA/2J	CAST/EiJ	PL/J	CBA/J	KK/HlJ	SWR/J	SM/J	NZW/LacJ	AKR/J	NZB/BlNJ	BALB/cJ	BUB/BnJ	BTBR_T+_tf/J	C57BL/6J	CE/J	NOD/LtJ	LP/J	LG/J	129X1/SvJ	C58/J
	4.10156e-07	Barhl2	intergenic	5	106905490	T	T	T	T	T	T	T	T	T	T	T	T	T	T	T	T	T	T	C	C	C	T	C	C	C
	Mean specific activity (nmol.mg.hour)					6	8.6	14	10.4	13.25	13.5	16.5	11.4	11.6	12.33	12.8	13.2	13.4	13.8	14.8	16	17.67	18.6	21.4	23.6	23.6	25	26	26.4	33.2

## Sheet: CHITO
	p value	Gene	Func_gene	Chr	Start	MA/MyJ	AKR/J	A/J	CAST/EiJ	CBA/J	NON/LtJ	PL/J	LP/J	KK/HlJ	DBA/2J	LG/J	BALB/cJ	RIIIS/J	NZW/LacJ	129X1/SvJ	NZB/BlNJ	C57BL/6J	NOD/LtJ	BUB/BnJ	BTBR_T+_tf/J	C58/J	SM/J	SWR/J	CE/J	SEA/GnJ
	2.45115e-08	Wdr89	intergenic	12	76773815	t	T	T	T	t	t	t	t	T	T	t	t	t	T	t	t	T	T	c	T	t	c	c	c	c
	2.45115e-08	Syne2	intronic	12	76961077	t	T	T	T	t	t	t	t	T	T	t	t	t	T	t	t	T	T	c	T	t	c	c	c	c
	2.45115e-08	Syne2	intronic	12	76972653	a	A	A	A	a	a	a	a	A	A	a	a	a	A	a	a	A	A	c	A	a	c	c	c	c
	2.45115e-08	Syne2	intronic	12	76982203	a	A	A	A	a	a	a	a	A	A	a	a	a	A	a	a	A	A	g	A	a	g	g	g	g
	2.45115e-08	Syne2	intronic	12	76998577	t	T	T	T	t	t	t	t	T	T	t	t	t	T	t	t	T	T	c	T	t	c	c	c	c
	2.45115e-08	Syne2	intronic	12	77016704	t	T	T	T	t	t	t	t	T	T	t	t	t	T	t	t	T	T	c	T	t	c	c	c	c
	2.45115e-08	Syne2	intronic	12	77022672	t	T	T	T	t	t	t	t	T	T	t	t	t	T	t	t	T	T	c	T	t	c	c	c	c
	1.37238e-06	Chchd6	intergenic	6	89566833	a	A	A	A	a	a	a	a	A	A	a	a	a	A	a	a	A	A	a	A	a	a	g	g	g
	Mean specific activity (nmol.mg.hour)					1.333	2	2.6	2.667	2.8	3	3.2	3.333	3.333	4	4.25	5	5.333	5.2	6.2	7.4	9.8	13	14	16	17.4	24.2	26	28.6	31.2

## Sheet: TRAP
	p value	Gene	Func_gene	Chr	Start	RIIIS/J	CBA/J	LG/J	CAST/EiJ	DBA/2J	LP/J	SEA/GnJ	NZB/BlNJ	PL/J	SM/J	NZW/LacJ	BALB/cJ	MA/MyJ	CE/J	AKR/J	SWR/J	BUB/BnJ	A/J	129X1/SvJ	C57BL/6J	KK/HlJ	BTBR_T+_tf/J	NON/LtJ	NOD/LtJ	C58/J
	7.71552e-07	Zfat	intergenic	15	68115989	a	a	a	A	A	a	a	a	a	a	C	a	c	a	C	c	a	C	c	C	C	C	c	C	c
	7.71552e-07	Zfat	intergenic	15	68156291	g	g	g	G	G	g	g	g	g	g	A	g	a	g	A	a	g	A	a	A	A	A	a	A	a
	7.71552e-07	Mir30d	intergenic	15	68244382	C	C	C	C	C	C	C	C	C	C	T	C	T	C	T	T	C	T	T	T	T	T	T	T	T
	7.71552e-07	Mir30d	intergenic	15	68259575	g	g	g	G	G	g	g	g	g	g	T	g	t	g	T	t	g	T	t	T	T	T	t	T	t
	7.71552e-07	Mir30d	intergenic	15	68268120	g	g	g	G	G	g	g	g	g	g	A	g	a	g	A	a	g	A	a	A	A	A	a	A	a
	Mean specific activity (nmol.mg.hour)					299.7	373.6	400	407.3	409.8	424.3	431.4	442	442	445	465.8	475.8	482.3	507	525.8	526.8	531.3	574.2	601.2	606.8	609	618.4	624.2	626	627.2

## Sheet: FUCA
	p value	Gene	Func_gene	Chr	Start	NZB/BlNJ	NON/LtJ	BALB/cJ	MA/MyJ	NZW/LacJ	PL/J	CBA/J	LG/J	CE/J	C57BL/6J	SWR/J	DBA/2J	C58/J	SM/J	RIIIS/J	BTBR_T+_tf/J	NOD/LtJ	BUB/BnJ	AKR/J	CAST/EiJ	A/J	SEA/GnJ	LP/J	129X1/SvJ	KK/HlJ
	6.06117e-17	Myom3	intergenic	4	135400588	c	c	c	c	C	c	c	c	c	C	c	C	c	c	c	C	C	c	C	C	T	t	t	t	T
	1.12846e-10	Vps45	intronic	3	95807768	c	c	c	c	C	c	c	c	c	C	c	C	c	c	c	C	C	c	C	C	C	t	t	t	T
	1.12846e-10	Hist2h2be	downstream	3	96027761	g	g	g	g	G	g	g	g	g	G	g	G	g	g	g	G	G	g	G	G	G	a	a	a	A
	1.12846e-10	Tet2	intergenic	3	133254547	a	a	a	a	A	a	a	a	a	A	a	A	a	a	a	A	A	a	A	A	A	c	c	c	C
	1.12846e-10	Myom3	intronic	4	135368084	a	a	a	a	A	a	a	a	a	A	a	A	a	a	a	A	A	a	A	A	A	g	g	g	G
	1.12846e-10	Zfp46	UTR3	4	135847850	a	a	a	a	A	a	a	a	a	A	a	A	a	a	a	A	A	a	A	A	A	g	g	g	G
	1.12846e-10	Hnrnpr	intergenic	4	135915162	c	c	c	c	C	c	c	c	c	C	c	C	c	c	c	C	C	c	C	C	C	t	t	t	T
	8.13393e-09	E2f2	UTR3	4	135750026	c	t	C	C	c	c	C	C	C	C	C	C	C	C	C	C	c	C	c	C	T	T	T	T	T
	6.67327e-08	Stkld1	intronic	2	26790736	A	A	A	A	A	A	A	A	A	A	A	A	A	A	A	A	A	A	A	A	A	A	C	C	C
	6.67327e-08	Xkr7	intergenic	2	152887679	g	g	g	g	G	g	g	g	g	G	g	G	g	g	g	G	G	g	G	G	G	g	a	a	A
	6.67327e-08	Ttpal	intronic	2	163432431	A	A	A	A	A	A	A	A	A	A	A	A	A	A	A	A	A	A	A	A	A	A	G	G	G
	6.67327e-08	5031425F14Rik	intergenic	2	166385633	g	g	g	g	G	g	g	g	g	G	g	G	g	g	g	G	G	g	G	G	G	g	a	a	A
	6.67327e-08	Prex1	intronic	2	166454602	t	t	t	t	T	t	t	t	t	T	t	T	t	t	t	T	T	t	T	T	T	t	c	c	C
	6.67327e-08	Fstl5	intronic	3	75988647	g	g	g	g	G	g	g	g	g	G	g	G	g	g	g	G	G	g	G	G	G	g	c	c	C
	6.67327e-08	Fam198b	intergenic	3	80258866	t	t	t	t	T	t	t	t	t	T	t	T	t	t	t	T	T	t	T	T	T	t	c	c	C
	6.67327e-08	Gnai3	intronic	3	107944015	g	g	g	g	G	g	g	g	g	G	g	G	g	g	g	G	G	g	G	G	G	g	t	t	T
	6.67327e-08	Izumo3	intergenic	4	92037153	a	a	a	a	A	a	a	a	a	A	a	A	a	a	a	A	A	a	A	A	A	a	g	g	G
	6.67327e-08	Izumo3	intergenic	4	92041555	c	c	c	c	C	c	c	c	c	C	c	C	c	c	c	C	C	c	C	C	C	c	a	a	A
	6.67327e-08	Tusc1	intergenic	4	93595315	G	G	G	G	G	G	G	G	G	G	G	G	G	G	G	G	G	G	G	G	G	G	T	T	T
	6.67327e-08	Fip1l1,Lnx1	intronic	5	74991609	g	g	g	g	G	g	g	g	g	G	g	G	g	g	g	G	G	g	G	G	G	g	a	a	A
	6.67327e-08	Fzd10	intergenic	5	129118110	g	g	g	g	G	g	g	g	g	G	g	G	g	g	g	G	G	g	G	G	G	g	a	a	A
	6.67327e-08	Grid2	intergenic	6	64648623	g	g	g	g	G	g	g	g	g	G	g	G	g	g	g	G	G	g	G	G	G	g	a	a	A
	6.67327e-08	Emp1	intronic	6	135314488	a	a	a	a	A	a	a	a	a	A	a	A	a	a	a	A	A	a	A	A	A	a	c	c	C
	6.67327e-08	Nucb2	intergenic	7	123723936	a	a	a	a	A	a	a	a	a	A	a	A	a	a	a	A	A	a	A	A	A	a	c	c	C
	6.67327e-08	Nucb2	intergenic	7	123791128	c	c	c	c	C	c	c	c	c	C	c	C	c	c	c	C	C	c	C	C	C	c	t	t	T
	6.67327e-08	Nucb2	intergenic	7	123806612	c	c	c	c	C	c	c	c	c	C	c	C	c	c	c	C	C	c	C	C	C	c	t	t	T
	6.67327e-08	Nucb2	intergenic	7	123837896	g	g	g	g	G	g	g	g	g	G	g	G	g	g	g	G	G	g	G	G	G	g	a	a	A
	6.67327e-08	Nucb2	intergenic	7	123859641	t	t	t	t	T	t	t	t	t	T	t	T	t	t	t	T	T	t	T	T	T	t	c	c	C
	6.67327e-08	Nucb2	intergenic	7	123897228	t	t	t	t	T	t	t	t	t	T	t	T	t	t	t	T	T	t	T	T	T	t	c	c	C
	6.67327e-08	Nucb2	intergenic	7	123962331	t	t	t	t	T	t	t	t	t	T	t	T	t	t	t	T	T	t	T	T	T	t	c	c	C
	6.67327e-08	Nucb2	intergenic	7	124048512	t	t	t	t	T	t	t	t	t	T	t	T	t	t	t	T	T	t	T	T	T	t	g	g	G
	6.67327e-08	Nucb2	intergenic	7	124284628	a	a	a	a	A	a	a	a	a	A	a	A	a	a	a	A	A	a	A	A	A	a	g	g	G
	6.67327e-08	Nucb2	intergenic	7	124294372	t	t	t	t	T	t	t	t	t	T	t	T	t	t	t	T	T	t	T	T	T	t	c	c	C
	6.67327e-08	Nucb2	intergenic	7	124309475	g	g	g	g	G	g	g	g	g	G	g	G	g	g	g	G	G	g	G	G	G	g	t	t	T
	6.67327e-08	Nucb2	intergenic	7	124329462	a	a	a	a	A	a	a	a	a	A	a	A	a	a	a	A	A	a	A	A	A	a	g	g	G
	6.67327e-08	Xylt1	intronic	7	124630919	a	a	a	a	A	a	a	a	a	A	a	A	a	a	a	A	A	a	A	A	A	a	g	g	G
	6.67327e-08	Xylt1	intergenic	7	124824141	a	a	a	a	A	a	a	a	a	A	a	A	a	a	a	A	A	a	A	A	A	a	t	t	T
	6.67327e-08	Phldb1	intronic	9	44499927	g	g	g	g	G	g	g	g	g	G	g	G	g	g	g	G	G	g	G	G	G	g	a	a	A
	6.67327e-08	Phldb1	intronic	9	44506503	g	g	g	g	G	g	g	g	g	G	g	G	g	g	g	G	G	g	G	G	G	g	a	a	A
	6.67327e-08	Arcn1	intronic	9	44568366	c	c	c	c	C	c	c	c	c	C	c	C	c	c	c	C	C	c	C	C	C	c	t	t	T
	6.67327e-08	Ift46	intronic	9	44594802	c	c	c	c	C	c	c	c	c	C	c	C	c	c	c	C	C	c	C	C	C	c	t	t	T
	6.67327e-08	Kmt2a	intronic	9	44644054	g	g	g	g	G	g	g	g	g	G	g	G	g	g	g	G	G	g	G	G	G	g	t	t	T
	6.67327e-08	Dscaml1	intronic	9	45241686	a	a	a	a	A	a	a	a	a	A	a	A	a	a	a	A	A	a	A	A	A	a	g	g	G
	6.67327e-08	Dscaml1	intronic	9	45278145	g	g	g	g	G	g	g	g	g	G	g	G	g	g	g	G	G	g	G	G	G	g	a	a	A
	6.67327e-08	Dscaml1	intronic	9	45308281	g	g	g	g	G	g	g	g	g	G	g	G	g	g	g	G	G	g	G	G	G	g	a	a	A
	6.67327e-08	Dscaml1	intronic	9	45315574	g	g	g	g	G	g	g	g	g	G	g	G	g	g	g	G	G	g	G	G	G	g	a	a	A
	6.67327e-08	Dscaml1	intronic	9	45395764	a	a	a	a	A	a	a	a	a	A	a	A	a	a	a	A	A	a	A	A	A	a	g	g	G
	6.67327e-08	Dscaml1	intronic	9	45405283	a	a	a	a	A	a	a	a	a	A	a	A	a	a	a	A	A	a	A	A	A	a	g	g	G
	6.67327e-08	Dscaml1	intronic	9	45542567	c	c	c	c	C	c	c	c	c	C	c	C	c	c	c	C	C	c	C	C	C	c	g	g	G
	6.67327e-08	Dscaml1	intronic	9	45552691	g	g	g	g	G	g	g	g	g	G	g	G	g	g	g	G	G	g	G	G	G	g	a	a	A
	6.67327e-08	Cep164	intronic	9	45581162	g	g	g	g	G	g	g	g	g	G	g	G	g	g	g	G	G	g	G	G	G	g	t	t	T
	6.67327e-08	Cep164	intronic	9	45613984	g	g	g	g	G	g	g	g	g	G	g	G	g	g	g	G	G	g	G	G	G	g	a	a	A
	6.67327e-08	Sik3	intronic	9	45887315	g	g	g	g	G	g	g	g	g	G	g	G	g	g	g	G	G	g	G	G	G	g	a	a	A
	6.67327e-08	Sik3	intronic	9	45923112	c	c	c	c	C	c	c	c	c	C	c	C	c	c	c	C	C	c	C	C	C	c	t	t	T
	6.67327e-08	Sik3	intronic	9	45935250	c	c	c	c	C	c	c	c	c	C	c	C	c	c	c	C	C	c	C	C	C	c	t	t	T
	6.67327e-08	Sik3	intronic	9	45987092	g	g	g	g	G	g	g	g	g	G	g	G	g	g	g	G	G	g	G	G	G	g	a	a	A
	6.67327e-08	Sik3	intronic	9	45997529	c	c	c	c	C	c	c	c	c	C	c	C	c	c	c	C	C	c	C	C	C	c	t	t	T
	6.67327e-08	Sik3	intronic	9	46009646	t	t	t	t	T	t	t	t	t	T	t	T	t	t	t	T	T	t	T	T	T	t	c	c	C
	6.67327e-08	Sik3	intronic	9	46029382	a	a	a	a	A	a	a	a	a	A	a	A	a	a	a	A	A	a	A	A	A	a	g	g	G
	6.67327e-08	Apoc3	upstream	9	46044128	a	a	a	a	A	a	a	a	a	A	a	A	a	a	a	A	A	a	A	A	A	a	g	g	G
	6.67327e-08	2900079G21Rik	intergenic	9	112973480	g	g	g	g	G	g	g	g	g	G	g	G	g	g	g	G	G	g	G	G	G	g	a	a	A
	6.67327e-08	Arhgap18	intronic	10	26518071	g	g	g	g	G	g	g	g	g	G	g	G	g	g	g	G	G	g	G	G	G	g	t	t	T
	6.67327e-08	Fam91a1	intergenic	15	58453180	T	T	T	T	T	T	T	T	T	T	T	T	T	T	T	T	T	T	T	T	T	T	A	A	A
	6.67327e-08	Trmt12	upstream	15	58703746	t	t	t	t	T	t	t	t	t	T	t	T	t	t	t	T	T	t	T	T	T	t	c	c	C
	6.67327e-08	4933412E24Rik	intergenic	15	59982575	t	t	t	t	T	t	t	t	t	T	t	T	t	t	t	T	T	t	T	T	T	t	c	c	C
	6.67327e-08	4933412E24Rik	intergenic	15	60300791	a	a	a	a	A	a	a	a	a	A	a	A	a	a	a	A	A	a	A	A	A	a	g	g	G
	6.67327e-08	4933412E24Rik	intergenic	15	60590289	G	G	G	G	G	G	G	G	G	G	G	G	G	G	G	G	G	G	G	G	G	G	C	C	C
	6.67327e-08	A1bg	intergenic	15	61225223	C	C	C	C	C	C	C	C	C	C	C	C	C	C	C	C	C	C	C	C	C	C	G	G	G
	6.67327e-08	A1bg	intergenic	15	61264068	a	a	a	a	A	a	a	a	a	A	a	A	a	a	a	A	A	a	A	A	A	a	g	g	G
	6.67327e-08	A1bg	intergenic	15	61279781	g	g	g	g	G	g	g	g	g	G	g	G	g	g	g	G	G	g	G	G	G	g	a	a	A
	6.67327e-08	A1bg	intergenic	15	61313960	t	t	t	t	T	t	t	t	t	T	t	T	t	t	t	T	T	t	T	T	T	t	c	c	C
	6.67327e-08	Pvt1	intergenic	15	62210003	C	C	C	C	C	C	C	C	C	C	C	C	C	C	C	C	C	C	C	C	C	C	T	T	T
	6.67327e-08	Adamts5	intergenic	16	86940620	C	C	C	C	C	C	C	C	C	C	C	C	C	C	C	C	C	C	C	C	C	C	T	T	T
	6.67327e-08	Adamts5	intergenic	16	87061081	C	C	C	C	C	C	C	C	C	C	C	C	C	C	C	C	C	C	C	C	C	C	T	T	T
	6.67327e-08	A730017C20Rik	intergenic	18	59300612	g	g	g	g	G	g	g	g	g	G	g	G	g	g	g	G	G	g	G	G	G	g	a	a	A
	6.67327e-08	Chsy3	intronic	18	59450441	g	g	g	g	G	g	g	g	g	G	g	G	g	g	g	G	G	g	G	G	G	g	a	a	A
	6.67327e-08	Chsy3	intronic	18	59461471	G	G	G	G	G	G	G	G	G	G	G	G	G	G	G	G	G	G	G	G	G	G	A	A	A
	6.67327e-08	Mir6355	intergenic	18	59954066	g	g	g	g	G	g	g	g	g	G	g	G	g	g	g	G	G	g	G	G	G	g	a	a	A
	2.29367e-07	Pde4dip	intronic	3	97611384	t	t	t	t	T	t	t	t	t	T	t	T	t	t	t	T	T	t	T	G	T	g	g	g	G
	2.29367e-07	Gm5544	intergenic	3	97776764	t	t	t	t	T	t	t	t	t	T	t	T	t	t	t	T	T	t	T	C	T	c	c	c	C
	2.29367e-07	Tet2	intergenic	3	133266985	a	a	a	a	A	a	a	a	a	A	a	A	a	a	a	A	A	a	A	G	A	g	g	g	G
	2.29367e-07	Ncmap	intergenic	4	134957965	g	g	g	g	G	g	g	g	g	G	g	G	g	g	g	G	G	g	G	C	G	c	c	c	C
	2.29367e-07	Il22ra1	intergenic	4	135313209	c	c	c	c	C	c	c	c	c	C	c	C	c	c	c	C	C	c	C	T	C	t	t	t	T
	2.29367e-07	Myom3	intronic	4	135326963	a	a	a	a	A	a	a	a	a	A	a	A	a	a	a	A	A	a	A	G	A	g	g	g	G
	2.29367e-07	Myom3	intronic	4	135349019	T	T	T	T	T	T	T	T	T	T	T	T	T	T	T	T	T	T	T	C	T	C	C	C	C
	2.29367e-07	Adamts5	intergenic	16	86011850	c	c	c	c	C	c	c	c	c	C	c	C	c	c	c	C	C	c	C	T	C	t	t	t	T
	2.71506e-07	Phxr4	intergenic	9	13325494	t	t	t	t	T	t	t	t	t	T	t	T	t	t	t	T	T	t	T	T	T	c	t	c	C
	2.71506e-07	Agtr1a	intergenic	13	30616192	g	g	g	g	G	g	g	g	g	G	g	G	g	g	g	G	G	g	G	G	G	t	g	t	T
	2.71506e-07	Exoc2	intronic	13	30935797	c	c	c	c	C	c	c	c	c	C	c	C	c	c	c	C	C	c	C	C	C	t	c	t	T
	2.71506e-07	Exoc2	intergenic	13	31269658	g	g	g	g	G	g	g	g	g	G	g	G	g	g	g	G	G	g	G	G	G	a	g	a	A
	2.71506e-07	4930401O12Rik	ncRNA_intronic	13	31314679	t	t	t	t	T	t	t	t	t	T	t	T	t	t	t	T	T	t	T	T	T	c	t	c	C
	3.50911e-07	Csnk1g3	intergenic	18	54497744	t	t	t	t	T	t	t	t	t	T	t	T	t	t	t	T	T	t	T	C	C	t	c	c	C
	3.50911e-07	Csnk1g3	intergenic	18	54561568	g	g	g	g	G	g	g	g	g	G	g	G	g	g	g	G	G	g	G	T	T	g	t	t	T
	1.33791e-06	Cdh6	intergenic	15	14282571	A	A	A	A	A	A	A	A	A	A	A	A	A	A	A	A	A	A	A	A	T	T	A	A	T
	1.33791e-06	Cdh6	intergenic	15	14467730	G	G	G	G	G	G	G	G	G	G	G	G	G	G	G	G	G	G	G	G	A	A	G	G	A
	1.33791e-06	Cdh6	intergenic	15	14547169	G	G	G	G	G	G	G	G	G	G	G	G	G	G	G	G	G	G	G	G	A	A	G	G	A
	1.64491e-06	Zc3h12c	intergenic	9	52463002	G	G	G	G	G	G	G	G	G	G	A	G	G	G	G	G	G	G	G	G	G	A	A	A	A
	1.64491e-06	Zc3h12c	intergenic	9	52473615	T	T	T	T	T	T	T	T	T	T	C	T	T	T	T	T	T	T	T	T	T	C	C	C	C
	1.9646e-06	Tet2	intergenic	3	133776322	A	G	G	G	G	G	G	G	G	G	G	G	G	G	G	G	G	G	G	G	G	A	A	A	A
	1.9646e-06	Tet2	intergenic	3	133824426	c	t	t	t	T	t	t	t	t	T	t	T	t	t	t	T	T	t	T	T	T	c	c	c	C
	1.9646e-06	Syf2	intergenic	4	134642022	g	a	a	a	A	a	a	a	a	A	a	A	a	a	a	A	A	a	A	A	A	g	g	g	G
	1.96468e-06	Scfd2	intronic	5	74655259	a	a	t	a	A	a	a	a	a	A	a	A	a	a	a	A	A	a	A	A	A	t	t	t	T
	1.96468e-06	Lnx1	intronic	5	75035307	c	c	t	c	C	c	c	c	c	C	c	C	c	c	c	C	C	c	C	C	C	t	t	t	T
	Mean specific activity (nmol.mg.hour)					0.8	0.84	0.82	0.8667	0.9	1	1.02	1.05	1.08	1.06	1.06	1.075	1.08	1.1	1.1	1.1	1.26	1.5	1.5	4.167	17.52	18.1	19.63	24.04	29.4

## Sheet: alpha_glucosidase
	p value	Gene	Func_gene	Chr	Start	RIIIS/J	NZW/LacJ	CAST/EiJ	NZB/BlNJ	LP/J	CBA/J	MA/MyJ	BALB/cJ	A/J	KK/HlJ	DBA/2J	BUB/BnJ	SEA/GnJ	NON/LtJ	SM/J	LG/J	BTBRT<+>tf/J	C57BL/6J	AKR/J	SWR/J	C58/J	PL/J	129X1/SvJ	CE/J	NOD/ShiLtJ
	1.84837e-06	Tiam2	intronic	17	3397480	G	G	G	G	G	G	G	G	G	G	G	G	G	G	G	G	G	G	G	G	G	G	A	A	A
	1.84837e-06	Tiam2	intronic	17	3503325	C	C	C	C	C	C	C	C	C	C	C	C	C	C	C	C	C	C	C	C	C	C	G	G	G
	1.84837e-06	Tfb1m	intronic	17	3557483	G	G	G	G	G	G	G	G	G	G	G	G	G	G	G	G	G	G	G	G	G	G	T	T	T
	Mean specific activity (nmol.mg.hour)					30	32	35.33	35.8	36.67	36.6	37.33	39.8	39.6	40.67	41.2	41.33	41.6	42.4	43.4	45.5	46.8	48.8	52.4	53	53.4	61.2	64.8	68.2	74.6

## Sheet: beta-D-galactosidase
	p value	Gene	Func_gene	Chr	Start	PL/J	NZB/BlNJ	BUB/BnJ	DBA/2J	AKR/J	NZW/LacJ	LP/J	129X1/SvJ	BTBRT<+>tf/J	SEA/GnJ	SM/J	NON/LtJ	KK/HlJ	CBA/J	MA/MyJ	NOD/ShiLtJ	LG/J	RIIIS/J	CAST/EiJ	SWR/J	A/J	CE/J	BALB/cJ	C57BL/6J	C58/J
	9.08897e-09	Lyplal1	intergenic	1	188026657	G	G	G	G	G	G	G	G	G	G	G	G	G	G	G	G	G	G	A	G	G	A	A	A	A
	2.32196e-08	4930433B08Rik	intergenic	3	18512557	G	G	G	G	G	G	G	G	G	G	G	G	G	G	G	G	G	G	G	G	G	G	A	A	A
	2.32196e-08	Peak1	intronic	9	56165236	C	C	C	C	C	C	C	C	C	C	C	C	C	C	C	C	C	C	C	C	C	C	T	T	T
	2.32196e-08	Imp3	intergenic	9	56793621	G	G	G	G	G	G	G	G	G	G	G	G	G	G	G	G	G	G	G	G	G	G	A	A	A
	2.32196e-08	Scamp2	intronic	9	57409841	C	C	C	C	C	C	C	C	C	C	C	C	C	C	C	C	C	C	C	C	C	C	T	T	T
	2.32196e-08	Loxl1	intergenic	9	58188292	G	G	G	G	G	G	G	G	G	G	G	G	G	G	G	G	G	G	G	G	G	G	A	A	A
	2.32196e-08	1700072B07Rik	intergenic	9	58256079	A	A	A	A	A	A	A	A	A	A	A	A	A	A	A	A	A	A	A	A	A	A	G	G	G
	2.32196e-08	Arih1	intergenic	9	59348484	T	T	T	T	T	T	T	T	T	T	T	T	T	T	T	T	T	T	T	T	T	T	C	C	C
	2.32196e-08	Pkm	intronic	9	59506197	T	T	T	T	T	T	T	T	T	T	T	T	T	T	T	T	T	T	T	T	T	T	A	A	A
	2.32196e-08	Iqch	intronic	9	63413504	G	G	G	G	G	G	G	G	G	G	G	G	G	G	G	G	G	G	G	G	G	G	A	A	A
	2.32196e-08	Smad3	intergenic	9	63754948	T	T	T	T	T	T	T	T	T	T	T	T	T	T	T	T	T	T	T	T	T	T	C	C	C
	2.32196e-08	Tmem100	intergenic	11	90080358	G	G	G	G	G	G	G	G	G	G	G	G	G	G	G	G	G	G	G	G	G	G	A	A	A
	2.32196e-08	Hlf	intergenic	11	90274499	C	C	C	C	C	C	C	C	C	C	C	C	C	C	C	C	C	C	C	C	C	C	T	T	T
	1.42884e-07	Prss39	intergenic	1	34572947	A	A	A	A	A	A	A	A	A	A	A	A	A	A	A	A	A	A	A	A	A	G	A	G	G
	1.42884e-07	Dok5	intergenic	2	171056712	C	C	C	C	C	C	C	C	C	C	C	C	C	C	C	C	C	C	C	C	C	G	C	G	G
	1.42884e-07	Dok5	intergenic	2	171543829	C	C	C	C	C	C	C	C	C	C	C	C	C	C	C	C	C	C	C	C	C	G	C	G	G
	1.42884e-07	Stpg2	intronic	3	139239017	C	C	C	C	C	C	C	C	C	C	C	C	C	C	C	C	C	C	C	C	C	T	C	T	T
	1.42884e-07	Pkn2	intronic	3	142469250	G	G	G	G	G	G	G	G	G	G	G	G	G	G	G	G	G	G	G	G	G	A	G	A	A
	1.42884e-07	Pkn2	intergenic	3	142673823	G	G	G	G	G	G	G	G	G	G	G	G	G	G	G	G	G	G	G	G	G	A	G	A	A
	1.42884e-07	A830019L24Rik	intergenic	3	142993683	A	A	A	A	A	A	A	A	A	A	A	A	A	A	A	A	A	A	A	A	A	G	A	G	G
	1.42884e-07	A830019L24Rik	intergenic	3	143207522	C	C	C	C	C	C	C	C	C	C	C	C	C	C	C	C	C	C	C	C	C	T	C	T	T
	1.42884e-07	Gm1653	intergenic	3	149868470	G	G	G	G	G	G	G	G	G	G	G	G	G	G	G	G	G	G	G	G	G	A	G	A	A
	1.42884e-07	Gm1653	intergenic	3	150361276	G	G	G	G	G	G	G	G	G	G	G	G	G	G	G	G	G	G	G	G	G	A	G	A	A
	1.42884e-07	Gm1653	intergenic	3	150528330	A	A	A	A	A	A	A	A	A	A	A	A	A	A	A	A	A	A	A	A	A	C	A	C	C
	1.42884e-07	Mir3963	intergenic	3	150891613	T	T	T	T	T	T	T	T	T	T	T	T	T	T	T	T	T	T	T	T	T	A	T	A	A
	1.42884e-07	Zfp326	intergenic	5	106509886	G	G	G	G	G	G	G	G	G	G	G	G	G	G	G	G	G	G	G	G	G	A	G	A	A
	1.42884e-07	Arrdc4	intergenic	7	76056435	G	G	G	G	G	G	G	G	G	G	G	G	G	G	G	G	G	G	G	G	G	A	G	A	A
	1.42884e-07	Arrdc4	intergenic	7	76355874	T	T	T	T	T	T	T	T	T	T	T	T	T	T	T	T	T	T	T	T	T	C	T	C	C
	1.42884e-07	Arnt2	intronic	7	91489641	C	C	C	C	C	C	C	C	C	C	C	C	C	C	C	C	C	C	C	C	C	G	C	G	G
	1.42884e-07	Arnt2	intronic	7	91515303	A	A	A	A	A	A	A	A	A	A	A	A	A	A	A	A	A	A	A	A	A	G	A	G	G
	1.42884e-07	Zfand6	intronic	7	91822330	A	A	A	A	A	A	A	A	A	A	A	A	A	A	A	A	A	A	A	A	A	G	A	G	G
	1.42884e-07	2610206C17Rik	ncRNA_exonic	7	91924025	C	C	C	C	C	C	C	C	C	C	C	C	C	C	C	C	C	C	C	C	C	T	C	T	T
	1.42884e-07	2610206C17Rik	intergenic	7	91983213	C	C	C	C	C	C	C	C	C	C	C	C	C	C	C	C	C	C	C	C	C	T	C	T	T
	1.42884e-07	Olfr290	intergenic	7	92074148	T	T	T	T	T	T	T	T	T	T	T	T	T	T	T	T	T	T	T	T	T	C	T	C	C
	1.42884e-07	Vmn2r66	intergenic	7	92164889	C	C	C	C	C	C	C	C	C	C	C	C	C	C	C	C	C	C	C	C	C	A	C	A	A
	1.42884e-07	Vmn2r67	exonic	7	92304365	A	A	A	A	A	A	A	A	A	A	A	A	A	A	A	A	A	A	A	A	A	C	A	C	C
	1.42884e-07	Vmn2r68	intergenic	7	92413867	T	T	T	T	T	T	T	T	T	T	T	T	T	T	T	T	T	T	T	T	T	C	T	C	C
	1.42884e-07	Vmn2r69	intergenic	7	92654980	G	G	G	G	G	G	G	G	G	G	G	G	G	G	G	G	G	G	G	G	G	T	G	T	T
	1.42884e-07	Vmn2r70	exonic	7	92712214	C	C	C	C	C	C	C	C	C	C	C	C	C	C	C	C	C	C	C	C	C	A	C	A	A
	1.42884e-07	Vmn2r71	intronic	7	92764176	C	C	C	C	C	C	C	C	C	C	C	C	C	C	C	C	C	C	C	C	C	G	C	G	G
	1.42884e-07	Vmn2r71	intergenic	7	92836806	C	C	C	C	C	C	C	C	C	C	C	C	C	C	C	C	C	C	C	C	C	T	C	T	T
	1.42884e-07	Vmn2r74	intergenic	7	93115878	G	G	G	G	G	G	G	G	G	G	G	G	G	G	G	G	G	G	G	G	G	A	G	A	A
	1.42884e-07	Vmn2r74	intergenic	7	93281647	A	A	A	A	A	A	A	A	A	A	A	A	A	A	A	A	A	A	A	A	A	G	A	G	G
	1.42884e-07	Olfr310	intergenic	7	93424670	C	C	C	C	C	C	C	C	C	C	C	C	C	C	C	C	C	C	C	C	C	G	C	G	G
	1.42884e-07	Vmn2r77	exonic	7	93952212	C	C	C	C	C	C	C	C	C	C	C	C	C	C	C	C	C	C	C	C	C	T	C	T	T
	1.42884e-07	Vmn2r78	intronic	7	94064118	A	A	A	A	A	A	A	A	A	A	A	A	A	A	A	A	A	A	A	A	A	G	A	G	G
	1.42884e-07	Vmn2r79	intergenic	7	94268075	T	T	T	T	T	T	T	T	T	T	T	T	T	T	T	T	T	T	T	T	T	C	T	C	C
	1.42884e-07	Tmem135	intronic	7	96428070	T	T	T	T	T	T	T	T	T	T	T	T	T	T	T	T	T	T	T	T	T	C	T	C	C
	1.42884e-07	Tmem135	intergenic	7	96521482	G	G	G	G	G	G	G	G	G	G	G	G	G	G	G	G	G	G	G	G	G	C	G	C	C
	1.42884e-07	Me3	intronic	7	96787509	C	C	C	C	C	C	C	C	C	C	C	C	C	C	C	C	C	C	C	C	C	A	C	A	A
	1.42884e-07	Dlg2	intronic	7	98910549	T	T	T	T	T	T	T	T	T	T	T	T	T	T	T	T	T	T	T	T	T	C	T	C	C
	1.42884e-07	Dlg2	intronic	7	99122676	C	C	C	C	C	C	C	C	C	C	C	C	C	C	C	C	C	C	C	C	C	T	C	T	T
	1.42884e-07	Dlg2	intronic	7	99451338	G	G	G	G	G	G	G	G	G	G	G	G	G	G	G	G	G	G	G	G	G	A	G	A	A
	1.42884e-07	Fam181b	intergenic	7	101915480	T	T	T	T	T	T	T	T	T	T	T	T	T	T	T	T	T	T	T	T	T	A	T	A	A
	1.42884e-07	Fam181b	intergenic	7	101930172	T	T	T	T	T	T	T	T	T	T	T	T	T	T	T	T	T	T	T	T	T	A	T	A	A
	1.42884e-07	Fam181b	intergenic	7	101981170	A	A	A	A	A	A	A	A	A	A	A	A	A	A	A	A	A	A	A	A	A	G	A	G	G
	1.42884e-07	Tenm4	intronic	7	103605621	T	T	T	T	T	T	T	T	T	T	T	T	T	T	T	T	T	T	T	T	T	G	T	G	G
	1.42884e-07	Pde2a	intronic	7	108618683	T	T	T	T	T	T	T	T	T	T	T	T	T	T	T	T	T	T	T	T	T	C	T	C	C
	1.42884e-07	Stim1	intronic	7	109570827	T	T	T	T	T	T	T	T	T	T	T	T	T	T	T	T	T	T	T	T	T	C	T	C	C
	1.42884e-07	Rrm1	intronic	7	109610751	C	C	C	C	C	C	C	C	C	C	C	C	C	C	C	C	C	C	C	C	C	T	C	T	T
	1.42884e-07	Olfr547	intergenic	7	109690138	G	G	G	G	G	G	G	G	G	G	G	G	G	G	G	G	G	G	G	G	G	A	G	A	A
	1.42884e-07	Olfr547	intergenic	7	109700872	G	G	G	G	G	G	G	G	G	G	G	G	G	G	G	G	G	G	G	G	G	A	G	A	A
	1.42884e-07	Trim21	intronic	7	109713010	T	T	T	T	T	T	T	T	T	T	T	T	T	T	T	T	T	T	T	T	T	C	T	C	C
	1.42884e-07	Olfr566	intergenic	7	110013412	C	C	C	C	C	C	C	C	C	C	C	C	C	C	C	C	C	C	C	C	C	A	C	A	A
	1.42884e-07	Olfr575	intergenic	7	110111888	T	T	T	T	T	T	T	T	T	T	T	T	T	T	T	T	T	T	T	T	T	A	T	A	A
	1.42884e-07	Olfr605	downstream	7	110590499	G	G	G	G	G	G	G	G	G	G	G	G	G	G	G	G	G	G	G	G	G	A	G	A	A
	1.42884e-07	Olfr624	intergenic	7	110828160	C	C	C	C	C	C	C	C	C	C	C	C	C	C	C	C	C	C	C	C	C	A	C	A	A
	1.42884e-07	Fez1	intronic	9	36674882	A	A	A	A	A	A	A	A	A	A	A	A	A	A	A	A	A	A	A	A	A	G	A	G	G
	1.42884e-07	4931429L15Rik	intergenic	9	46601343	G	G	G	G	G	G	G	G	G	G	G	G	G	G	G	G	G	G	G	G	G	T	G	T	T
	1.42884e-07	Slc9a9	intronic	9	94603478	T	T	T	T	T	T	T	T	T	T	T	T	T	T	T	T	T	T	T	T	T	G	T	G	G
	1.42884e-07	Pdcd6ip	intergenic	9	113631406	A	A	A	A	A	A	A	A	A	A	A	A	A	A	A	A	A	A	A	A	A	G	A	G	G
	1.42884e-07	Clasp2	intronic	9	113732519	G	G	G	G	G	G	G	G	G	G	G	G	G	G	G	G	G	G	G	G	G	A	G	A	A
	1.42884e-07	Clasp2	intronic	9	113769315	T	T	T	T	T	T	T	T	T	T	T	T	T	T	T	T	T	T	T	T	T	A	T	A	A
	1.42884e-07	Clasp2	intronic	9	113798254	C	C	C	C	C	C	C	C	C	C	C	C	C	C	C	C	C	C	C	C	C	A	C	A	A
	1.42884e-07	Susd5	intergenic	9	114152159	G	G	G	G	G	G	G	G	G	G	G	G	G	G	G	G	G	G	G	G	G	A	G	A	A
	1.42884e-07	Smurf2	intronic	11	106753528	T	T	T	T	T	T	T	T	T	T	T	T	T	T	T	T	T	T	T	T	T	G	T	G	G
	1.42884e-07	Bptf	intergenic	11	106994496	T	T	T	T	T	T	T	T	T	T	T	T	T	T	T	T	T	T	T	T	T	G	T	G	G
	1.42884e-07	Cacng5	intronic	11	107776173	C	C	C	C	C	C	C	C	C	C	C	C	C	C	C	C	C	C	C	C	C	T	C	T	T
	1.42884e-07	Plk2	intergenic	13	111445888	A	A	A	A	A	A	A	A	A	A	A	A	A	A	A	A	A	A	A	A	A	G	A	G	G
	1.42884e-07	Boc	intergenic	16	44565007	T	T	T	T	T	T	T	T	T	T	T	T	T	T	T	T	T	T	T	T	T	C	T	C	C
	1.42884e-07	Arhgap28	intergenic	17	68409630	A	A	A	A	A	A	A	A	A	A	A	A	A	A	A	A	A	A	A	A	A	T	A	T	T
	1.42884e-07	Stk32a	intronic	18	43426155	G	G	G	G	G	G	G	G	G	G	G	G	G	G	G	G	G	G	G	G	G	A	G	A	A
	1.42884e-07	Dpysl3	intronic	18	43516456	C	C	C	C	C	C	C	C	C	C	C	C	C	C	C	C	C	C	C	C	C	A	C	A	A
	1.42884e-07	1700120E14Rik	ncRNA_intronic	18	74685733	G	G	G	G	G	G	G	G	G	G	G	G	G	G	G	G	G	G	G	G	G	A	G	A	A
	1.42884e-07	Smad2	intronic	18	76422833	T	T	T	T	T	T	T	T	T	T	T	T	T	T	T	T	T	T	T	T	T	C	T	C	C
	3.62494e-07	Borg	intergenic	15	38749579	C	C	C	C	C	C	C	C	C	T	C	C	C	C	C	C	C	C	C	C	C	T	T	T	T
	3.62494e-07	Oxr1	intronic	15	41646520	A	A	A	A	A	A	A	A	A	G	A	A	A	A	A	A	A	A	A	A	A	G	G	G	G
	1.12244e-06	Glb1	exonic	9	114333064	T	T	T	T	T	T	T	T	T	T	T	T	T	T	C	T	T	C	T	T	C	C	C	C	C
	Mean specific activity (nmol.mg.hour)					37	37.6	40	44.25	46.2	48.4	48.33	49.8	50.2	53.4	54.6	55	55.33	58	58.67	59	59.75	69.33	69.67	74.8	92.8	129.2	136.6	147.4	175

## Sheet: GM1b
	p value	Gene	Func_gene	Chr	Start	RIIIS/J	LG/J	SEA/GnJ	KK/HlJ	SWR/J	MA/MyJ	CE/J	BALB/cJ	SM/J	A/J	NZW/LacJ	AKR/J	CBA/J	NZB/BlNJ	129X1/SvJ	LP/J	C57BL/6J	DBA/2J	NON/LtJ	PL/J	BTBRT<+>tf/J	C58/J	NOD/ShiLtJ
	2.71087e-06	Hrasls	intergenic	16	29161604	A	A	A	A	A	A	A	A	A	A	A	A	A	A	A	A	C	A	C	C	C	C	C
	2.71087e-06	Hrasls	intergenic	16	29169848	A	A	A	A	A	A	A	A	A	A	A	A	A	A	A	A	G	A	G	G	G	G	G
	Mean levels (nmol.mg protein)					0	0.000425	0.000475	0.0005	0.0006	0.00075	0.0008	0.00094	0.001125	0.001333	0.0014	0.00188	0.002575	0.002833	0.003025	0.00316	0.0036	0.0039	0.004	0.004625	0.006267	0.0066	0.0102

## Sheet: GD1a
	p value	Gene	Func_gene	Chr	Start	RIIIS/J	CBA/J	129X1/SvJ	LG/J	PL/J	AKR/J	SEA/GnJ	CE/J	LP/J	C57BL/6J	NON/LtJ	BTBRT<+>tf/J	DBA/2J	KK/HlJ	BALB/cJ	C58/J	SM/J	NOD/ShiLtJ	SWR/J	NZB/BlNJ	MA/MyJ	A/J	NZW/LacJ
	1.46375e-07	Ctnnbl1	intronic	2	157632357	T	T	T	T	T	T	T	T	T	T	T	T	T	T	T	T	T	T	T	T	T	A	A
	1.46375e-07	Rap2b	intergenic	3	61765728	A	A	A	A	A	A	A	A	A	A	A	A	A	A	A	A	A	A	A	A	A	C	C
	1.46375e-07	Arhgef26	intronic	3	62232093	C	C	C	C	C	C	C	C	C	C	C	C	C	C	C	C	C	C	C	C	C	T	T
	1.46375e-07	Gpr149	intergenic	3	62470651	C	C	C	C	C	C	C	C	C	C	C	C	C	C	C	C	C	C	C	C	C	G	G
	1.46375e-07	Gpr149	intergenic	3	62688525	G	G	G	G	G	G	G	G	G	G	G	G	G	G	G	G	G	G	G	G	G	T	T
	1.46375e-07	Mme	intergenic	3	63366177	G	G	G	G	G	G	G	G	G	G	G	G	G	G	G	G	G	G	G	G	G	A	A
	1.46375e-07	Bche	intergenic	3	73566936	G	G	G	G	G	G	G	G	G	G	G	G	G	G	G	G	G	G	G	G	G	T	T
	1.46375e-07	Gm20356	intergenic	3	73888484	C	C	C	C	C	C	C	C	C	C	C	C	C	C	C	C	C	C	C	C	C	G	G
	1.46375e-07	Gm20356	intergenic	3	74136873	G	G	G	G	G	G	G	G	G	G	G	G	G	G	G	G	G	G	G	G	G	T	T
	1.46375e-07	Gm20356	intergenic	3	74331916	T	T	T	T	T	T	T	T	T	T	T	T	T	T	T	T	T	T	T	T	T	C	C
	1.46375e-07	Gm20356	intergenic	3	74377299	C	C	C	C	C	C	C	C	C	C	C	C	C	C	C	C	C	C	C	C	C	T	T
	1.46375e-07	Serpini2	intergenic	3	75196695	C	C	C	C	C	C	C	C	C	C	C	C	C	C	C	C	C	C	C	C	C	G	G
	1.46375e-07	A530072M11Rik	intergenic	4	17659606	C	C	C	C	C	C	C	C	C	C	C	C	C	C	C	C	C	C	C	C	C	T	T
	1.46375e-07	Cabp1	intergenic	5	115665863	G	G	G	G	G	G	G	G	G	G	G	G	G	G	G	G	G	G	G	G	G	A	A
	1.46375e-07	Cox6a1	intergenic	5	115861067	T	T	T	T	T	T	T	T	T	T	T	T	T	T	T	T	T	T	T	T	T	C	C
	1.46375e-07	Msi1	intergenic	5	115906887	C	C	C	C	C	C	C	C	C	C	C	C	C	C	C	C	C	C	C	C	C	T	T
	1.46375e-07	Gcn1l1	intergenic	5	116077281	G	G	G	G	G	G	G	G	G	G	G	G	G	G	G	G	G	G	G	G	G	A	A
	1.46375e-07	Gm4559	intergenic	7	149477749	C	C	C	C	C	C	C	C	C	C	C	C	C	C	C	C	C	C	C	C	C	A	A
	1.46375e-07	Slc4a1	exonic	11	102222543	T	T	T	T	T	T	T	T	T	T	T	T	T	T	T	T	T	T	T	T	T	C	C
	1.46375e-07	Gpatch8	intronic	11	102353877	G	G	G	G	G	G	G	G	G	G	G	G	G	G	G	G	G	G	G	G	G	T	T
	1.46375e-07	Serpina3c	intergenic	12	105429853	C	C	C	C	C	C	C	C	C	C	C	C	C	C	C	C	C	C	C	C	C	G	G
	1.46375e-07	D230030E09Rik	intergenic	12	119930383	T	T	T	T	T	T	T	T	T	T	T	T	T	T	T	T	T	T	T	T	T	A	A
	1.46375e-07	D230030E09Rik	intergenic	12	120046410	C	C	C	C	C	C	C	C	C	C	C	C	C	C	C	C	C	C	C	C	C	G	G
	1.46375e-07	Itgb8	intergenic	12	120609690	T	T	T	T	T	T	T	T	T	T	T	T	T	T	T	T	T	T	T	T	T	C	C
	1.46375e-07	Itgb8	intergenic	12	120671934	T	T	T	T	T	T	T	T	T	T	T	T	T	T	T	T	T	T	T	T	T	C	C
	1.46375e-07	Macc1	intergenic	12	120853293	G	G	G	G	G	G	G	G	G	G	G	G	G	G	G	G	G	G	G	G	G	A	A
	1.46375e-07	Macc1	intergenic	12	121001859	G	G	G	G	G	G	G	G	G	G	G	G	G	G	G	G	G	G	G	G	G	A	A
	1.46375e-07	Tmem196	upstream	12	121184116	A	A	A	A	A	A	A	A	A	A	A	A	A	A	A	A	A	A	A	A	A	G	G
	1.46375e-07	Tmem196	intronic	12	121202700	G	G	G	G	G	G	G	G	G	G	G	G	G	G	G	G	G	G	G	G	G	A	A
	1.46375e-07	Ndp	intergenic	X	16604367	C	C	C	C	C	C	C	C	C	C	C	C	C	C	C	C	C	C	C	C	C	T	T
	7.91872e-07	Ankrd55	intronic	13	113155498	G	G	G	G	G	G	G	G	G	G	G	G	G	G	G	G	G	G	G	T	T	T	T
	8.28826e-07	Gm20356	intergenic	3	74220371	G	G	G	G	G	G	G	G	G	G	G	G	G	G	G	G	G	G	G	G	C	C	C
	1.13054e-06	Gabrp	intergenic	11	33509230	C	C	C	C	C	C	C	C	C	C	C	C	C	C	C	C	C	C	C	A	C	A	A
	1.13054e-06	Ctns	UTR3	11	72996926	A	A	A	A	A	A	A	A	A	A	A	A	A	A	A	A	A	A	A	G	A	G	G
	1.13054e-06	Ctns	intronic	11	73006336	C	C	C	C	C	C	C	C	C	C	C	C	C	C	C	C	C	C	C	G	C	G	G
	1.13054e-06	4930465M20Rik	intergenic	12	109016198	T	T	T	T	T	T	T	T	T	T	T	T	T	T	T	T	T	T	T	C	T	C	C
	1.13054e-06	4930465M20Rik	intergenic	12	109031849	C	C	C	C	C	C	C	C	C	C	C	C	C	C	C	C	C	C	C	T	C	T	T
	Mean levels (nmol.mg protein)					0.00176	0.0022	0.002356	0.002384	0.002393	0.002446	0.002466	0.002538	0.00254	0.002647	0.002743	0.002833	0.002883	0.002913	0.00332	0.003463	0.003535	0.003598	0.003965	0.00424	0.004295	0.005867	0.0074

[truncated: 4 more sheets: GD1b, GA2, Lac, GM3Gc]
