# Supplementary material for: A mouse systems genetics approach reveals common and uncommon genetic modifiers of hepatic lysosomal enzyme activities and glycosphingolipids
Source: Research Square preprint supplement (doi:10.21203/rs.3.rs-2362074/v1), 2022-12-28
Supplement: Supplementary file 4 [file 9a66ebd40f922db1b14bef7b.xlsx]

## Sheet: GCase
Gene	Chr	Location (bp)	Ref_allele	Alt_allele	Functional Annotation	rsID	AA_change	SIFT_score	SIFT_prediction	MA/My J	CBA/J	A/J	KK/Hl J	129X1/Sv J	RIIIS/J	BALB/c J	CE/J	LP/J	NZW/Lac J	DBA/2J	SWR/J	C57BL/6J	NZB/Bl NJ	SM/J	BTBR T<+> Itpr3<tf>/J	AKR/J	PL/J	SEA/Gn J	LG/J	CAST/Ei J	BUB/Bn J	C58/J
Arhgef1	7	24917907	C	T	missense_variant	rs258025444	R42C	0.005	DELETERIOUS (WARNING LOW CONFIDENCE)	C	C	C	C	C	C	C	C	C	C	C	C	C	C	C	C	C	T	C	T	C	C	C
Mean specific activity (nmol.mg.hour)										21	24	26	27	27	28	28	28	29	30	30	30	30	30	30	32	32	33	33	36	39	39	40

## Sheet: CHITO
Gene	Chr	Location (bp)	Ref_allele	Alt_allele	Functional Annotation	rsID	AA_change	SIFT_score	SIFT_prediction	MA/My J	AKR/J	A/J	CAST/Ei J	CBA/J	PL/J	LP/J	KK/Hl J	DBA/2J	LG/J	BALB/c J	RIIIS/J	NZW/LacJ	129X1/Sv J	NZB/Bl NJ2	C57BL/6J	BUB/Bn J	BTBR T<+> Itpr3<tf>/J	C58/J	SM/J	SWR/J	CE/J	SEA/Gn J
Chchd6	6	89467434	G	A	missense_variant	rs13474057	R189C	0.007	DELETERIOUS	A	G	A	G	A	G	A	A	A	G	G	A	A	A	A	G	G	A	A	A	G	G	G
Syne2	12	75925718	A	G	missense_variant	rs212836285	E1076G	0.004	DELETERIOUS (WARNING LOW CONFIDENCE)	A	A	A	A	A	A	A	A	A	A	A	A	A	A	A	A	A	A	A	A	A	A	A		-
Syne2	12	75925718	A	G	missense_variant	rs212836285	E1077G	0.004	DELETERIOUS (WARNING LOW CONFIDENCE)	A	A	A	A	A	A	A	A	A	A	A	A	A	A	A	A	A	A	A	A	A	A	A		-
Syne2	12	75930774	T	A	missense_variant	rs215656880	L1331Q	0	DELETERIOUS	T	T	T	T	T	T	T	T	T	T	T	T	T	T	T	T	T	T	T	T	T	T	T		-
Syne2	12	75930774	T	A	missense_variant	rs215656880	L1332Q	0	DELETERIOUS	T	T	T	T	T	T	T	T	T	T	T	T	T	T	T	T	T	T	T	T	T	T	T
Syne2	12	76042081	C	T	missense_variant	rs217460039	T5070I	0.027	DELETERIOUS	C	C	C	T	C	C	C	C	C	C	C	C	C	C	C	C	T	C	C	T	T	C	T
Syne2	12	76042081	C	T	missense_variant	rs217460039	T5071I	0.027	DELETERIOUS	C	C	C	T	C	C	C	C	C	C	C	C	C	C	C	C	T	C	C	T	T	C	T
Syne2	12	75918548	T	G	missense_variant	rs218056684	L779R	0.034	DELETERIOUS (WARNING LOW CONFIDENCE)	T	T	T	T	T	T	T	T	T	T	T	T	T	T	T	T	T	T	T	T	T	T	T
Syne2	12	75918548	T	G	missense_variant	rs218056684	L780R	0.034	DELETERIOUS (WARNING LOW CONFIDENCE)	T	T	T	T	T	T	T	T	T	T	T	T	T	T	T	T	T	T	T	T	T	T	T
Syne2	12	76059693	G	A	missense_variant	rs221592405	G5578E	0.013	DELETERIOUS	G	G	G	G	G	G	G	G	G	G	G	G	G	G	G	G	G	G	G	G	G	G	G
Syne2	12	76059693	G	A	missense_variant	rs221592405	G5579E	0.013	DELETERIOUS	G	G	G	G	G	G	G	G	G	G	G	G	G	G	G	G	G	G	G	G	G	G	G
Syne2	12	75930840	T	G	missense_variant	rs221958305	L1353R	0.014	DELETERIOUS	T	T	T	T	T	T	T	T	T	T	T	T	T	T	T	T	T	T	T	T	T	T	T
Syne2	12	75930840	T	G	missense_variant	rs221958305	L1354R	0.014	DELETERIOUS	T	T	T	T	T	T	T	T	T	T	T	T	T	T	T	T	T	T	T	T	T	T	T
Syne2	12	76106086	A	T	missense_variant	rs222804188	Q6682L	0.022	DELETERIOUS	A	A	A	A	A	A	A	A	A	A	A	A	A	A	A	A	A	A	A	A	A	A	A
Syne2	12	76106086	A	T	missense_variant	rs222804188	Q6683L	0.022	DELETERIOUS	A	A	A	A	A	A	A	A	A	A	A	A	A	A	A	A	A	A	A	A	A	A	A
Syne2	12	75938656	A	G	missense_variant	rs225027050	E1625G	0	DELETERIOUS	A	A	A	A	A	A	A	A	A	A	A	A	A	A	A	A	A	A	A	A	A	A	A
Syne2	12	75938656	A	G	missense_variant	rs225027050	E1626G	0	DELETERIOUS	A	A	A	A	A	A	A	A	A	A	A	A	A	A	A	A	A	A	A	A	A	A	A
Syne2	12	75937391	T	G	missense_variant	rs226198098	C1588G	0	DELETERIOUS	T	T	T	T	T	T	T	T	T	T	T	T	T	T	T	T	T	T	T	T	T	T	T
Syne2	12	75937391	T	G	missense_variant	rs226198098	C1589G	0	DELETERIOUS	T	T	T	T	T	T	T	T	T	T	T	T	T	T	T	T	T	T	T	T	T	T	T
Syne2	12	75984000	A	G	missense_variant	rs228476061	E3626G	0.003	DELETERIOUS	A	A	A	A	A	A	A	A	A	A	A	A	A	A	A	A	A	A	A	A	A	A	A
Syne2	12	75984000	A	G	missense_variant	rs228476061	E3627G	0.003	DELETERIOUS	A	A	A	A	A	A	A	A	A	A	A	A	A	A	A	A	A	A	A	A	A	A	A
Syne2	12	75931062	T	A	missense_variant	rs230521240	L1427H	0.027	DELETERIOUS	T	T	T	T	T	T	T	T	T	T	T	T	T	T	T	T	T	T	T	T	T	T	T
Syne2	12	75931062	T	A	missense_variant	rs230521240	L1428H	0.027	DELETERIOUS	T	T	T	T	T	T	T	T	T	T	T	T	T	T	T	T	T	T	T	T	T	T	T
Syne2	12	76031666	C	T	missense_variant	rs230956102	A4757V	0.015	DELETERIOUS	C	C	C	C	C	C	C	C	C	C	C	C	C	C	C	C	C	C	C	C	C	T	C
Syne2	12	76031666	C	T	missense_variant	rs230956102	A4758V	0.015	DELETERIOUS	C	C	C	C	C	C	C	C	C	C	C	C	C	C	C	C	C	C	C	C	C	T	C
Syne2	12	76031666	C	T	missense_variant	rs230956102	A18V	0.04	DELETERIOUS	C	C	C	C	C	C	C	C	C	C	C	C	C	C	C	C	C	C	C	C	C	T	C
Syne2	12	76025557	G	A		rs233629576	V4462M	0.006	DELETERIOUS	G	G	G	G	G	G	G	G	G	G	G	G	G	G	G	G	G	G	G	G	G	G	G
Syne2	12	76025557	G	A		rs233629576	V4463M	0.006	DELETERIOUS	G	G	G	G	G	G	G	G	G	G	G	G	G	G	G	G	G	G	G	G	G	G	G
Syne2	12	76025557	G	A		rs233629576	V116M	0	DELETERIOUS (WARNING LOW CONFIDENCE)	G	G	G	G	G	G	G	G	G	G	G	G	G	G	G	G	G	G	G	G	G	G	G
Syne2	12	76042085	G	A	synonymous_variant	rs234078106	E5071E	0.044	DELETERIOUS	G	G	G	G	G	G	G	G	G	G	G	G	G	G	G	G	G	G	G	G	G	G	G
Syne2	12	76042085	G	A	synonymous_variant	rs234078106	E5072E	0.044	DELETERIOUS	G	G	G	G	G	G	G	G	G	G	G	G	G	G	G	G	G	G	G	G	G	G	G
Syne2	12	75987032	G	A	missense_variant	rs238348243	R3684K	0.036	DELETERIOUS	G	G	G	G	G	G	G	G	G	G	G	G	G	G	G	G	G	G	G	G	G	G	G
Syne2	12	75987032	G	A	missense_variant	rs238348243	R3685K	0.036	DELETERIOUS	G	G	G	G	G	G	G	G	G	G	G	G	G	G	G	G	G	G	G	G	G	G	G
Syne2	12	76103815	G	A	missense_variant	rs239014201	V6538M	0.011	DELETERIOUS	G	G	G	G	G	G	G	G	G	G	G	G	G	G	G	G	G	G	G	G	G	G	G
Syne2	12	76103815	G	A	missense_variant	rs239014201	V6539M	0.012	DELETERIOUS	G	G	G	G	G	G	G	G	G	G	G	G	G	G	G	G	G	G	G	G	G	G	G
Syne2	12	75982045	G	A	missense_variant	rs239112849	R3607Q	0.007	DELETERIOUS	G	G	G	G	G	G	G	G	G	G	G	G	G	G	G	G	G	G	G	G	G	G	G
Syne2	12	75982045	G	A	missense_variant	rs239112849	R3608Q	0.007	DELETERIOUS	G	G	G	G	G	G	G	G	G	G	G	G	G	G	G	G	G	G	G	G	G	G	G
Syne2	12	76059702	T	G	missense_variant	rs240790377	L5581W	0.002	DELETERIOUS	T	T	T	T	T	T	T	T	T	T	T	T	T	T	T	T	T	T	T	T	T	T	T
Syne2	12	76059702	T	G	missense_variant	rs240790377	L5582W	0.002	DELETERIOUS	T	T	T	T	T	T	T	T	T	T	T	T	T	T	T	T	T	T	T	T	T	T	T
Syne2	12	76059702	T	G	missense_variant	rs240790377	L842W	0.006	DELETERIOUS	T	T	T	T	T	T	T	T	T	T	T	T	T	T	T	T	T	T	T	T	T	T	T
Syne2	12	76059702	T	G	missense_variant	rs240790377	L356W	0.009	DELETERIOUS	T	T	T	T	T	T	T	T	T	T	T	T	T	T	T	T	T	T	T	T	T	T	T
Syne2	12	75930914	A	G	missense_variant	rs241604005	I1378V	0.045	DELETERIOUS	A	A	A	A	A	A	A	A	A	A	A	A	A	A	A	A	A	A	A	A	A	A	A
Syne2	12	75930914	A	G	missense_variant	rs241604005	I1379V	0.045	DELETERIOUS	A	A	A	A	A	A	A	A	A	A	A	A	A	A	A	A	A	A	A	A	A	A	A
Syne2	12	76099397	T	C	stop_lost	rs243679962	C1170C	0.024	DELETERIOUS	T	T	T	T	T	T	T	T	T	T	T	T	T	T	T	T	T	T	T	T	T	T	T
Syne2	12	76061653	G	T	missense_variant	rs246876841	R5676L	0.008	DELETERIOUS	G	T	G	T	G	T	T	G	T	T	G	G	T	T	T	G	T	T	T	T	T	T	T
Syne2	12	76061653	G	T	missense_variant	rs246876841	R5677L	0.008	DELETERIOUS	G	T	G	T	G	T	T	G	T	T	G	G	T	T	T	G	T	T	T	T	T	T	T
Syne2	12	76059684	A	C		rs250101438	E836A	0.02	DELETERIOUS	A	A	A	A	A	A	A	A	A	A	A	A	A	A	A	A	A	A	A	A	A	A	A
Syne2	12	76059684	A	C		rs250101438	E350A	0.02	DELETERIOUS	A	A	A	A	A	A	A	A	A	A	A	A	A	A	A	A	A	A	A	A	A	A	A
Syne2	12	76059684	A	C		rs250101438	E5575A	0.026	DELETERIOUS	A	A	A	A	A	A	A	A	A	A	A	A	A	A	A	A	A	A	A	A	A	A	A
Syne2	12	76059684	A	C		rs250101438	E5576A	0.026	DELETERIOUS	A	A	A	A	A	A	A	A	A	A	A	A	A	A	A	A	A	A	A	A	A	A	A
Syne2	12	75967647	A	G	missense_variant	rs250781321	E3204G	0.004	DELETERIOUS	A	A	A	A	A	A	A	A	A	A	A	A	A	A	A	A	A	A	A	A	A	A	A
Syne2	12	75967647	A	G	missense_variant	rs250781321	E3205G	0.004	DELETERIOUS	A	A	A	A	A	A	A	A	A	A	A	A	A	A	A	A	A	A	A	A	A	A	A
Syne2	12	75963716	G	A	missense_variant	rs251047195	E2466K	0.019	DELETERIOUS (WARNING LOW CONFIDENCE)	G	G	G	G	G	G	G	G	G	G	G	G	G	G	G	G	G	G	G	G	G	G	G
Syne2	12	75963716	G	A	missense_variant	rs251047195	E2467K	0.019	DELETERIOUS (WARNING LOW CONFIDENCE)	G	G	G	G	G	G	G	G	G	G	G	G	G	G	G	G	G	G	G	G	G	G	G
Syne2	12	75912376	A	G	missense_variant	rs257065303	E693G	0.049	DELETERIOUS	A	A	A	A	A	A	A	A	A	A	A	A	A	A	A	A	A	A	A	A	A	A	A
Syne2	12	75912376	A	G	missense_variant	rs257065303	E694G	0.049	DELETERIOUS	A	A	A	A	A	A	A	A	A	A	A	A	A	A	A	A	A	A	A	A	A	A	A
Syne2	12	75973379	G	A	missense_variant	rs260015122	A3430T	0.022	DELETERIOUS	G	G	G	G	G	G	G	G	G	G	G	G	G	G	G	G	G	G	G	G	G	G	G
Syne2	12	75973379	G	A	missense_variant	rs260015122	A3431T	0.022	DELETERIOUS	G	G	G	G	G	G	G	G	G	G	G	G	G	G	G	G	G	G	G	G	G	G	G
Syne2	12	75921182	G	A	missense_variant	rs260436631	R901H	0.045	DELETERIOUS	G	G	G	G	G	G	G	G	G	G	G	G	G	G	G	G	A	G	G	G	A	A	G
Syne2	12	75921182	G	A	missense_variant	rs260436631	R902H	0.045	DELETERIOUS	G	G	G	G	G	G	G	G	G	G	G	G	G	G	G	G	A	G	G	G	A	A	G
Syne2	12	75922952	C	T	missense_variant	rs260805558	L933F	0.028	DELETERIOUS	C	C	C	C	C	C	C	C	C	C	C	C	C	C	C	C	C	C	C	C	C	C	C
Syne2	12	75922952	C	T	missense_variant	rs260805558	L934F	0.028	DELETERIOUS	C	C	C	C	C	C	C	C	C	C	C	C	C	C	C	C	C	C	C	C	C	C	C
Syne2	12	75929336	G	T	missense_variant	rs261300089	A1186S	0.007	DELETERIOUS (WARNING LOW CONFIDENCE)	G	G	G	G	G	G	G	G	G	G	G	G	G	G	G	G	G	G	G	G	G	G	G
Syne2	12	75929336	G	T	missense_variant	rs261300089	A1187S	0.007	DELETERIOUS (WARNING LOW CONFIDENCE)	G	G	G	G	G	G	G	G	G	G	G	G	G	G	G	G	G	G	G	G	G	G	G
Syne2	12	75994176	G	A	missense_variant	rs264061065	M3869I	0.035	DELETERIOUS	G	G	G	A	G	G	G	G	G	G	G	G	G	G	G	G	G	G	G	G	G	G	G
Syne2	12	75994176	G	A	missense_variant	rs264061065	M3870I	0.035	DELETERIOUS	G	G	G	A	G	G	G	G	G	G	G	G	G	G	G	G	G	G	G	G	G	G	G
Syne2	12	75973367	G	T	missense_variant	rs264803848	D3426Y	0.005	DELETERIOUS (WARNING LOW CONFIDENCE)	G	G	G	G	G	G	G	G	G	G	G	G	G	G	G	G	G	G	G	G	G	G	G
Syne2	12	75973367	G	T	missense_variant	rs264803848	D3427Y	0.005	DELETERIOUS (WARNING LOW CONFIDENCE)	G	G	G	G	G	G	G	G	G	G	G	G	G	G	G	G	G	G	G	G	G	G	G
Syne2	12	76099308	C	T	missense_variant	rs29211141	R6366C	0.005	DELETERIOUS	C	T	C	C	C	T	T	C	T	T	C	C	T	T	T	C	T	T	T	T	C	T	T
Syne2	12	76099308	C	T	missense_variant	rs29211141	R6367C	0.005	DELETERIOUS	C	T	C	C	C	T	T	C	T	T	C	C	T	T	T	C	T	T	T	T	C	T	T
Syne2	12	76066628	A	T	missense_variant	rs29488499	E5836V	0.012	DELETERIOUS	A	A	A	A	A	T	T	A	A	T	A	A	T	T	T	A	A	T	A	A	A	A	A
Syne2	12	76066628	A	T	missense_variant	rs29488499	E5837V	0.012	DELETERIOUS	A	A	A	A	A	T	T	A	A	T	A	A	T	T	T	A	A	T	A	A	A	A	A
Syne2	12	76066628	A	T	missense_variant	rs29488499	E1097V	0.031	DELETERIOUS	A	A	A	A	A	T	T	A	A	T	A	A	T	T	T	A	A	T	A	A	A	A	A
Syne2	12	75938748	C	A	missense_variant	rs387192056	L1656I	0.012	DELETERIOUS	C	C	C	C	C	C	C	C	C	C	C	C	C	C	C	C	A	C	C	C	A	C	C
Syne2	12	75938748	C	A	missense_variant	rs387192056	L1657I	0.012	DELETERIOUS	C	C	C	C	C	C	C	C	C	C	C	C	C	C	C	C	A	C	C	C	A	C	C
Syne2	12	75919050	G	A	missense_variant	rs387325472	A849T	0.005	DELETERIOUS	G	G	G	G	G	G	G	G	G	G	G	G	G	G	G	G	A	G	G	G	A	A	G
Syne2	12	75919050	G	A	missense_variant	rs387325472	A850T	0.005	DELETERIOUS	G	G	G	G	G	G	G	G	G	G	G	G	G	G	G	G	A	G	G	G	A	A	G
Syne2	12	76095148	G	A	missense_variant	rs45671528	E6153K	0.023	DELETERIOUS	G	G	G	G	G	G	G	G	G	G	G	G	G	G	G	G	G	G	G	G	G	G	G
Syne2	12	76095148	G	A	missense_variant	rs45671528	E6154K	0.023	DELETERIOUS	G	G	G	G	G	G	G	G	G	G	G	G	G	G	G	G	G	G	G	G	G	G	G
Syne2	12	75969460	C	T	missense_variant	rs45729931	S3272L	0.038	DELETERIOUS	C	C	C	C	C	C	C	C	C	C	C	C	C	C	C	C	C	C	C	C	C	C	C
Syne2	12	75969460	C	T	missense_variant	rs45729931	S3273L	0.038	DELETERIOUS	C	C	C	C	C	C	C	C	C	C	C	C	C	C	C	C	C	C	C	C	C	C	C
Syne2	12	75967058	C	A	missense_variant	rs45890094	L3008I	0	DELETERIOUS	C	C	C	C	C	C	C	C	C	C	C	C	C	C	C	C	C	C	C	C	A	C	C
Syne2	12	75967058	C	A	missense_variant	rs45890094	L3009I	0	DELETERIOUS	C	C	C	C	C	C	C	C	C	C	C	C	C	C	C	C	C	C	C	C	A	C	C
Syne2	12	76035656	T	C	missense_variant	rs45958156	Y4867H	0	DELETERIOUS	T	T	T	C	T	T	T	T	T	T	T	T	T	T	T	T	T	T	T	T	T	T	T
Syne2	12	76035656	T	C	missense_variant	rs45958156	Y4868H	0	DELETERIOUS	T	T	T	C	T	T	T	T	T	T	T	T	T	T	T	T	T	T	T	T	T	T	T
Syne2	12	76035656	T	C	missense_variant	rs45958156	Y128H	0	DELETERIOUS	T	T	T	C	T	T	T	T	T	T	T	T	T	T	T	T	T	T	T	T	T	T	T
Syne2	12	76052105	C	A	missense_variant	rs46100745	Q5253K	0.013	DELETERIOUS	C	A	C	A	C	A	A	C	A	A	C	C	A	A	A	C	A	A	A	A	A	A	A
Syne2	12	76052105	C	A	missense_variant	rs46100745	Q5254K	0.013	DELETERIOUS	C	A	C	A	C	A	A	C	A	A	C	C	A	A	A	C	A	A	A	A	A	A	A
Syne2	12	75912360	A	C	missense_variant	rs46310137	T688P	0.042	DELETERIOUS (WARNING LOW CONFIDENCE)	A	A	A	A	A	A	A	A	A	A	A	A	A	A	A	A	A	A	A	A	A	A	A
Syne2	12	75912360	A	C	missense_variant	rs46310137	T689P	0.042	DELETERIOUS (WARNING LOW CONFIDENCE)	A	A	A	A	A	A	A	A	A	A	A	A	A	A	A	A	A	A	A	A	A	A	A
Syne2	12	76072236	G	A	missense_variant	rs46494633	E5876K	0.032	DELETERIOUS	G	A	G	G	G	G	G	G	A	G	G	G	G	G	G	G	G	G	A	G	G	G	G
Syne2	12	76072236	G	A	missense_variant	rs46494633	E5877K	0.032	DELETERIOUS	G	A	G	G	G	G	G	G	A	G	G	G	G	G	G	G	G	G	A	G	G	G	G
Syne2	12	76107486	C	T		rs46680884	R1977R	0.049	DELETERIOUS	C	T	C	C	C	T	T	C	T	T	C	C	T	T	T	C	T	T	T	T	T	T	T
Syne2	12	75905310	T	A	missense_variant	rs46789198	S451T	0.005	DELETERIOUS	T	T	T	T	T	T	T	T	T	T	T	T	T	T	T	T	T	T	T	T	T	A	T
Syne2	12	75987103	G	A	missense_variant	rs47649868	E3708K	0	DELETERIOUS	G	G	G	G	G	G	G	G	G	G	G	G	G	G	G	G	G	G	G	G	G	G	G
Syne2	12	75987103	G	A	missense_variant	rs47649868	E3709K	0	DELETERIOUS	G	G	G	G	G	G	G	G	G	G	G	G	G	G	G	G	G	G	G	G	G	G	G
Syne2	12	75930950	G	C	missense_variant	rs47672311	E1390Q	0.013	DELETERIOUS	G	G	G	G	G	G	G	G	G	G	G	G	G	G	G	G	G	G	G	G	G	G	G
Syne2	12	75930950	G	C	missense_variant	rs47672311	E1391Q	0.013	DELETERIOUS	G	G	G	G	G	G	G	G	G	G	G	G	G	G	G	G	G	G	G	G	G	G	G
Syne2	12	76061673	A	G	missense_variant	rs47975304	S5683G	0.009	DELETERIOUS	A	G	A	G	A	G	G	A	G	G	A	A	G	G	G	A	G	G	G	G	G	G	G
Syne2	12	76061673	A	G	missense_variant	rs47975304	S5684G	0.009	DELETERIOUS	A	G	A	G	A	G	G	A	G	G	A	A	G	G	G	A	G	G	G	G	G	G	G
Syne2	12	76061673	A	G	missense_variant	rs47975304	S458G	0.029	DELETERIOUS	A	G	A	G	A	G	G	A	G	G	A	A	G	G	G	A	G	G	G	G	G	G	G
Syne2	12	76061673	A	G	missense_variant	rs47975304	S944G	0.023	DELETERIOUS	A	G	A	G	A	G	G	A	G	G	A	A	G	G	G	A	G	G	G	G	G	G	G
Syne2	12	75983976	T	A	missense_variant	rs48330058	L3618H	0.001	DELETERIOUS	T	T	T	A	T	T	T	T	T	T	T	T	T	T	T	T	T	T	T	T	T	T	T
Syne2	12	75983976	T	A	missense_variant	rs48330058	L3619H	0.001	DELETERIOUS	T	T	T	A	T	T	T	T	T	T	T	T	T	T	T	T	T	T	T	T	T	T	T
Syne2	12	76015669	C	T	missense_variant	rs48394811	A4255V	0.019	DELETERIOUS	C	C	C	C	C	C	C	C	C	C	C	C	C	C	C	C	C	C	C	C	C	T	C
Syne2	12	76015669	C	T	missense_variant	rs48394811	A4256V	0.019	DELETERIOUS	C	C	C	C	C	C	C	C	C	C	C	C	C	C	C	C	C	C	C	C	C	T	C
Syne2	12	75951079	A	G	missense_variant	rs48480809	K2276R	0.004	DELETERIOUS (WARNING LOW CONFIDENCE)	A	A	A	A	A	A	A	A	A	A	A	A	A	A	A	A	A	A	A	A	A	A	A
Syne2	12	75951079	A	G	missense_variant	rs48480809	K2277R	0.004	DELETERIOUS (WARNING LOW CONFIDENCE)	A	A	A	A	A	A	A	A	A	A	A	A	A	A	A	A	A	A	A	A	A	A	A
Syne2	12	75969622	T	C	missense_variant	rs48747792	V3326A	0.025	DELETERIOUS	T	T	T	T	T	T	T	T	T	T	T	T	T	T	T	T	C	T	T	T	C	C	T
Syne2	12	75969622	T	C	missense_variant	rs48747792	V3327A	0.025	DELETERIOUS	T	T	T	T	T	T	T	T	T	T	T	T	T	T	T	T	C	T	T	T	C	C	T
Syne2	12	75921127	A	G	missense_variant	rs48841031	I883V	0.046	DELETERIOUS	A	A	A	A	A	A	A	A	A	A	A	A	A	A	A	A	A	A	A	A	A	A	A
Syne2	12	75921127	A	G	missense_variant	rs48841031	I884V	0.046	DELETERIOUS	A	A	A	A	A	A	A	A	A	A	A	A	A	A	A	A	A	A	A	A	A	A	A
Syne2	12	75919098	G	A	missense_variant	rs49056032	G865R	0.041	DELETERIOUS	G	G	G	G	G	G	G	G	G	G	G	G	G	G	G	G	G	G	G	G	G	G	G
Syne2	12	75919098	G	A	missense_variant	rs49056032	G866R	0.041	DELETERIOUS	G	G	G	G	G	G	G	G	G	G	G	G	G	G	G	G	G	G	G	G	G	G	G
Syne2	12	76024022	G	T	missense_variant	rs49228096	K4416N	0.019	DELETERIOUS	G	G	G	T	G	G	G	G	G	G	G	G	G	G	G	G	G	G	G	G	G	G	G
Syne2	12	76024022	G	T	missense_variant	rs49228096	K4417N	0.019	DELETERIOUS	G	G	G	T	G	G	G	G	G	G	G	G	G	G	G	G	G	G	G	G	G	G	G
Syne2	12	76061739	G	A	missense_variant	rs49287659	D480N	0.021	DELETERIOUS	G	G	G	G	G	G	G	G	G	G	G	G	G	G	G	G	G	G	G	G	G	G	G
Syne2	12	76061739	G	A	missense_variant	rs49287659	D966N	0.046	DELETERIOUS	G	G	G	G	G	G	G	G	G	G	G	G	G	G	G	G	G	G	G	G	G	G	G
Syne2	12	75969607	G	A	missense_variant	rs49782350	R3321H	0.008	DELETERIOUS	G	G	G	G	G	G	G	G	G	G	G	G	G	G	G	G	A	G	G	G	A	A	G
Syne2	12	75969607	G	A	missense_variant	rs49782350	R3322H	0.008	DELETERIOUS	G	G	G	G	G	G	G	G	G	G	G	G	G	G	G	G	A	G	G	G	A	A	G
Syne2	12	75893173	A	G	missense_variant	rs49929800	D295G	0.012	DELETERIOUS	A	A	A	A	A	A	A	A	A	A	A	A	A	A	A	A	G	A	A	A	G	G	A
Syne2	12	76042039	G	A	missense_variant	rs50329150	S5056N	0.034	DELETERIOUS	G	G	G	G	G	G	G	G	G	G	G	G	G	G	G	G	G	G	G	G	G	A	G
Syne2	12	76042039	G	A	missense_variant	rs50329150	S5057N	0.034	DELETERIOUS	G	G	G	G	G	G	G	G	G	G	G	G	G	G	G	G	G	G	G	G	G	A	G
Syne2	12	75981936	G	A	missense_variant	rs50602090	E3571K	0	DELETERIOUS	G	G	G	G	G	G	G	G	G	G	G	G	G	G	G	G	G	G	G	G	G	G	G
Syne2	12	75981936	G	A	missense_variant	rs50602090	E3572K	0	DELETERIOUS	G	G	G	G	G	G	G	G	G	G	G	G	G	G	G	G	G	G	G	G	G	G	G
Syne2	12	75899200	A	G	missense_variant	rs50979019	I349V	0.007	DELETERIOUS	A	A	A	A	A	A	A	A	A	A	A	A	A	A	A	A	G	A	A	A	G	G	A
Syne2	12	76031590	G	A	missense_variant	rs51065579	G4732S	0.006	DELETERIOUS	G	G	G	G	G	G	G	G	G	G	G	G	G	G	G	G	G	G	G	G	G	G	G
Syne2	12	76031590	G	A	missense_variant	rs51065579	G4733S	0.006	DELETERIOUS	G	G	G	G	G	G	G	G	G	G	G	G	G	G	G	G	G	G	G	G	G	G	G
Syne2	12	75921188	T	A	missense_variant	rs51470507	V903D	0.034	DELETERIOUS	T	T	T	T	T	T	T	T	T	T	T	T	T	T	T	T	T	T	T	T	T	T	T
Syne2	12	75921188	T	A	missense_variant	rs51470507	V904D	0.034	DELETERIOUS	T	T	T	T	T	T	T	T	T	T	T	T	T	T	T	T	T	T	T	T	T	T	T
Syne2	12	76043845	C	T	missense_variant	rs51670560	R396C	0.005	DELETERIOUS	C	C	C	C	C	C	C	C	C	C	C	C	C	C	C	C	C	C	C	C	T	C	C
Syne2	12	76043845	C	T	missense_variant	rs51670560	R5135C	0.024	DELETERIOUS	C	C	C	C	C	C	C	C	C	C	C	C	C	C	C	C	C	C	C	C	T	C	C
Syne2	12	76043845	C	T	missense_variant	rs51670560	R5136C	0.024	DELETERIOUS	C	C	C	C	C	C	C	C	C	C	C	C	C	C	C	C	C	C	C	C	T	C	C
Syne2	12	76072201	A	T	missense_variant	rs51701751	Q27L	0.032	DELETERIOUS (WARNING LOW CONFIDENCE)	A	T	A	A	A	A	A	A	T	A	A	A	A	A	A	A	A	A	T	A	A	A	A
Syne2	12	76008886	C	G	missense_variant	rs51849973	S4174W	0	DELETERIOUS	C	C	C	G	C	C	C	C	C	C	C	C	C	C	C	C	C	C	C	C	C	C	C
Syne2	12	76008886	C	G	missense_variant	rs51849973	S4175W	0	DELETERIOUS	C	C	C	G	C	C	C	C	C	C	C	C	C	C	C	C	C	C	C	C	C	C	C
Syne2	12	75909338	T	C	missense_variant	rs51870451	L606S	0.016	DELETERIOUS	T	T	T	T	T	T	T	T	T	T	T	T	T	T	T	T	T	T	T	T	T	C	T
Syne2	12	75969432	A	G	missense_variant	rs52024460	I3263V	0.045	DELETERIOUS	A	A	A	A	A	A	A	A	A	A	A	A	A	A	A	A	G	A	A	A	G	G	A
Syne2	12	75969432	A	G	missense_variant	rs52024460	I3264V	0.045	DELETERIOUS	A	A	A	A	A	A	A	A	A	A	A	A	A	A	A	A	G	A	A	A	G	G	A
Mean specific activity (nmol.mg.hour)										1	2	3	3	3	3	3	3	4	4	5	5	5	6	7	10	14	16	17	24	26	29	31

## Sheet: TRAP
Gene	Chr	Location (bp)	Ref_allele	Alt_allele	Functional Annotation	rsID	AA_change	SIFT_score	SIFT_prediction	RIIIS/J	CBA/J	LG/J	CAST/Ei J	DBA/2J	LP/J	SEA/Gn J	NZB/Bl NJ	PL/J	SM/J	NZW/Lac J	BALB/c J	MA/My J	CE/J	AKR/J	SWR/J	BUB/Bn J	A/J	129X1/Sv J	C57BL/6J	KK/Hl J	BTBR T<+> Itpr3<tf>/J	C58/J
Zfat	15	68212740	C	A	missense_variant	rs264418288	G101C	0.038	DELETERIOUS	C	C	C	C	C	C	C	C	C	C	C	C	C	C	C	C	C	C	C	C	C	C	C
Zfat	15	68105061	C	T	missense_variant	rs249371825	E1080K	0.021	DELETERIOUS	C	C	C	C	C	C	C	C	C	C	C	C	C	C	T	T	C	C	C	C	C	C	C
Mean specific activity (nmol.mg.hour)										300	374	400	407	410	424	431	442	442	445	466	476	482	507	526	527	531	574	601	607	609	618	627

## Sheet: FUCA
Gene	Chr	Location (bp)	Ref_allele	Alt_allele	Functional Annotation	rsID	AA_change	SIFT_score	SIFT_prediction	NZB/Bl NJ	BALB/c J	MA/My J	NZW/Lac J	PL/J	CBA/J	LG/J	CE/J	C57BL/6J	SWR/J	DBA/2J	C58/J	SM/J	RIIIS/J	BTBR T<+> Itpr3<tf>/J	BUB/Bn J	AKR/J	CAST/Ei J	A/J	SEA/Gn J	LP/J	129X1/Sv J	KK/Hl J
Myom3	4	135778165	G	C	missense_variant	rs27579315	G455A	0.031	DELETERIOUS	G	G	G	G	G	G	G	G	G	G	G	G	G	N	G	G	G	G	G	G	G	G	G
Myom3	4	135814375	G	A	missense_variant	rs27579235	V1426M	0	DELETERIOUS	G	G	G	G	G	G	G	G	G	G	G	G	G	N	G	G	G	G	G	G	G	G	G
Myom3	4	135783054	G	A	missense_variant	rs214400937	E553K	0.023	DELETERIOUS	G	G	G	G	G	G	G	G	G	G	G	G	G	G	G	G	G	G	G	G	G	G	G
Tet2	3	133486222	G	A	missense_variant	rs30765242	P817L	0.037	DELETERIOUS	G	G	G	G	G	G	G	G	G	G	G	G	G	G	G	G	G	G	G	G	G	G	G
Tet2	3	133485706	T	G	missense_variant	rs265836188	K989T	0.025	DELETERIOUS	T	T	T	T	T	T	T	T	T	T	T	T	T	T	T	T	T	G	T	T	T	T	T
Tet2	3	133466946	C	T	missense_variant	rs262481769	E1844K	0.045	DELETERIOUS	C	C	C	C	C	C	C	C	C	C	C	C	C	C	C	C	C	T	C	C	C	C	C
Tet2	3	133488626	G	A	missense_variant	rs260650824	P16S	0	DELETERIOUS	G	G	G	G	G	G	G	G	G	G	G	G	G	G	G	G	G	G	G	G	G	G	G
Tet2	3	133469443	T	C	missense_variant	rs234114764	E1373G	0.003	DELETERIOUS	T	T	T	T	T	T	T	T	T	T	T	T	T	T	T	T	T	T	T	T	T	T	T
Tet2	3	133488029	G	T	missense_variant	rs229245357	L215I	0.032	DELETERIOUS	T	G	G	T	G	G	G	G	G	G	G	G	G	T	G	G	G	G	G	G	G	G	G
Tet2	3	133467299	G	A	missense_variant	rs223448810	T1726I	0.04	DELETERIOUS	G	G	G	G	G	G	G	G	G	G	G	G	G	G	G	G	G	G	G	G	G	G	G
Tet2	3	133487473	C	T	missense_variant	rs219128560	G400E	0.038	DELETERIOUS	C	C	C	C	C	C	C	C	C	C	C	C	C	C	C	C	C	C	C	C	C	C	C
Tet2	3	133487989	A	T	missense_variant	rs211990717	I228N	0.005	DELETERIOUS	A	A	A	A	A	A	A	A	A	A	A	A	A	A	A	A	A	A	A	A	A	A	A
Stkld1	2	26951474	T	C	missense_variant	rs27185346	V477A	0.005	DELETERIOUS	T	T	C	T	T	T	T	T	T	T	T	T	T	T	T	T	T	T	T	T	T	T	T
Stkld1	2	26951428	G	T	missense_variant	rs255780603	V462L	0	DELETERIOUS	G	G	G	G	G	G	G	G	G	G	G	G	G	G	G	G	G	G	G	G	G	G	G
Prex1	2	166587164	C	T	synonymous_variant	rs27344629	L666L	0.037	DELETERIOUS	T	C	C	C	C	C	C	C	C	T	T	C	C	T	C	T	T	C	C	C	T	T	C
Prex1	2	166587164	C	T	synonymous_variant	rs27344629	L836L	0.041	DELETERIOUS	T	C	C	C	C	C	C	C	C	T	T	C	C	T	C	T	T	C	C	C	T	T	C
Prex1	2	166580279	C	T	missense_variant	rs27298695	G41E	0.02	DELETERIOUS	C	C	T	C	T	C	T	C	C	C	C	C	C	C	C	C	C	C	C	C	C	C	C
Prex1	2	166580279	C	T	missense_variant	rs27298695	G1229E	0.01	DELETERIOUS (WARNING LOW CONFIDENCE)	C	C	T	C	T	C	T	C	C	C	C	C	C	C	C	C	C	C	C	C	C	C	C
Prex1	2	166580279	C	T	missense_variant	rs27298695	G1059E	0.011	DELETERIOUS (WARNING LOW CONFIDENCE)	C	C	T	C	T	C	T	C	C	C	C	C	C	C	C	C	C	C	C	C	C	C	C
Fstl5	3	76708152	C	T	missense_variant	rs31115634	T840I	0.033	DELETERIOUS	C	T	C	C	T	C	T	C	C	C	T	C	T	C	C	T	T	C	C	C	C	C	T
Fstl5	3	76661848	A	T	missense_variant	rs31110796	I603F	0.005	DELETERIOUS	T	A	A	T	A	A	A	A	A	A	A	A	A	T	T	A	A	A	T	A	A	T	A
Fstl5	3	76648309	G	A	missense_variant	rs31107961	V498M	0.042	DELETERIOUS	G	G	G	G	G	G	G	G	G	G	G	G	G	G	G	G	G	G	G	G	G	G	G
Fstl5	3	76648363	G	A	missense_variant	rs245181204	V516I	0.013	DELETERIOUS	G	G	G	G	G	G	G	G	G	G	G	G	G	G	G	G	G	A	G	G	G	G	G
Fstl5	3	76429769	G	T	missense_variant	rs229514041	D212Y	0.044	DELETERIOUS	G	G	G	G	G	G	G	G	G	G	G	G	G	G	G	G	G	G	G	G	G	G	G
Izumo3	4	92144568	G	A	missense_variant	rs28157936	S257L	0	DELETERIOUS (WARNING LOW CONFIDENCE)	G	G	G	G	G	G	G	G	G	G	G	G	G	G	G	G	G	A	G	G	G	G	G
Izumo3	4	92144568	G	A	missense_variant	rs28157936	S187L	0	DELETERIOUS (WARNING LOW CONFIDENCE)	G	G	G	G	G	G	G	G	G	G	G	G	G	G	G	G	G	A	G	G	G	G	G
Izumo3	4	92144634	T	C	missense_variant	rs222926363	E165G	0.015	DELETERIOUS (WARNING LOW CONFIDENCE)	T	T	T	T	T	T	T	T	T	T	T	T	T	T	T	T	T	T	T	T	T	T	T
Izumo3	4	92144634	T	C	missense_variant	rs222926363	E235G	0.017	DELETERIOUS (WARNING LOW CONFIDENCE)	T	T	T	T	T	T	T	T	T	T	T	T	T	T	T	T	T	T	T	T	T	T	T
Izumo3	4	92144712	G	C	missense_variant	rs221210079	A139G	0.049	DELETERIOUS (WARNING LOW CONFIDENCE)	G	G	G	G	G	G	G	G	G	G	G	G	G	G	G	G	G	G	G	G	G	G	G
Izumo3	4	92144575	C	A	missense_variant	rs214944756	A255S	0	DELETERIOUS (WARNING LOW CONFIDENCE)	C	C	C	C	C	C	C	C	C	C	C	C	C	C	C	C	C	C	C	C	C	C	C
Izumo3	4	92144575	C	A	missense_variant	rs214944756	A185S	0	DELETERIOUS (WARNING LOW CONFIDENCE)	C	C	C	C	C	C	C	C	C	C	C	C	C	C	C	C	C	C	C	C	C	C	C
Lnx1	5	74597917	T	G	stop_lost	rs261369179	K637T	0.048	DELETERIOUS	T	T	T	T	T	T	T	T	T	T	T	T	T	T	T	T	T	T	T	T	T	T	T
Lnx1	5	74685687	G	A	missense_variant	rs51405728	T34M	0.022	DELETERIOUS	G	G	G	G	G	G	G	G	G	G	G	G	G	G	G	G	G	A	G	G	G	G	G
Lnx1	5	74685665	G	T	missense_variant	rs50023960	D41E	0	DELETERIOUS	G	G	G	G	G	G	G	G	G	G	G	G	G	G	G	G	G	G	G	G	G	G	G
Lnx1	5	74685777	G	A	missense_variant	rs49787244	P4L	0.015	DELETERIOUS	G	A	G	G	G	G	G	G	G	G	G	G	G	G	G	G	G	A	G	A	G	G	G
Phldb1	9	44715942	C	T	missense_variant	rs29984860	R146H	0.03	DELETERIOUS	C	T	T	C	T	C	T	C	C	T	T	C	C	C	T	T	T	C	T	T	C	C	C
Phldb1	9	44715942	C	T	missense_variant	rs29984860	R402H	0.033	DELETERIOUS	C	T	T	C	T	C	T	C	C	T	T	C	C	C	T	T	T	C	T	T	C	C	C
Phldb1	9	44694460	G	A	missense_variant	rs226359327	R1234W	0	DELETERIOUS	G	G	G	G	G	G	G	G	G	G	G	G	G	G	G	G	G	G	G	G	A	G	G
Phldb1	9	44694460	G	A	missense_variant	rs226359327	R1187W	0	DELETERIOUS	G	G	G	G	G	G	G	G	G	G	G	G	G	G	G	G	G	G	G	G	A	G	G
Phldb1	9	44694460	G	A	missense_variant	rs226359327	R1187W	0	DELETERIOUS	G	G	G	G	G	G	G	G	G	G	G	G	G	G	G	G	G	G	G	G	A	G	G
Phldb1	9	44694460	G	A	missense_variant	rs226359327	R1301W	0	DELETERIOUS	G	G	G	G	G	G	G	G	G	G	G	G	G	G	G	G	G	G	G	G	A	G	G
Phldb1	9	44694460	G	A	missense_variant	rs226359327	R1234W	0	DELETERIOUS	G	G	G	G	G	G	G	G	G	G	G	G	G	G	G	G	G	G	G	G	A	G	G
Phldb1	9	44694460	G	A	missense_variant	rs226359327	R993W	0	DELETERIOUS	G	G	G	G	G	G	G	G	G	G	G	G	G	G	G	G	G	G	G	G	A	G	G
Phldb1	9	44694460	G	A	missense_variant	rs226359327	R694W	0.003	DELETERIOUS	G	G	G	G	G	G	G	G	G	G	G	G	G	G	G	G	G	G	G	G	A	G	G
Phldb1	9	44694460	G	A	missense_variant	rs226359327	R358W	0.006	DELETERIOUS	G	G	G	G	G	G	G	G	G	G	G	G	G	G	G	G	G	G	G	G	A	G	G
Phldb1	9	44694460	G	A	missense_variant	rs226359327	R547W	0.007	DELETERIOUS	G	G	G	G	G	G	G	G	G	G	G	G	G	G	G	G	G	G	G	G	A	G	G
Phldb1	9	44694460	G	A	missense_variant	rs226359327	R504W	0.007	DELETERIOUS	G	G	G	G	G	G	G	G	G	G	G	G	G	G	G	G	G	G	G	G	A	G	G
Kmt2a	9	44818284	G	A		rs243470733	R3576W	0.018	DELETERIOUS	G	G	G	G	G	G	G	G	G	G	G	G	A	G	G	G	G	G	G	G	G	G	G
Kmt2a	9	44818284	G	A		rs243470733	R3579W	0.018	DELETERIOUS	G	G	G	G	G	G	G	G	G	G	G	G	A	G	G	G	G	G	G	G	G	G	G
Kmt2a	9	44849232	C	T	missense_variant	rs231899833	R473H	0.034	DELETERIOUS	C	C	C	C	C	C	C	C	C	C	C	C	C	C	C	C	C	C	C	C	C	C	C
Dscaml1	9	45749732	G	C	synonymous_variant	rs32648240	K1727N	0.01	DELETERIOUS (WARNING LOW CONFIDENCE)	G	C	G	G	G	G	G	G	G	C	C	G	G	C	G	G	G	G	C	G	G	G	G
Cep164	9	45787444	T	A	missense_variant	rs32645146	H460L	0.045	DELETERIOUS	T	T	T	T	T	T	T	T	T	T	T	T	T	T	T	T	T	T	T	T	A	A	A
Cep164	9	45778479	G	A	missense_variant	rs32640978	R727W	0.002	DELETERIOUS	G	G	G	G	G	G	G	G	G	G	G	G	G	G	G	G	G	G	G	G	A	A	A
Cep164	9	45802672	C	T	missense_variant	rs258772352	E221K	0.018	DELETERIOUS	C	C	C	C	C	C	C	C	C	C	C	C	C	C	C	C	C	C	C	C	C	C	C
Cep164	9	45779404	T	A	missense_variant	rs251347235	Q632L	0.027	DELETERIOUS	T	T	T	T	T	T	T	T	T	T	T	T	T	T	T	T	T	A	T	T	A	A	A
A1bg	15	60917966	C	T	missense_variant	rs48693526	V478I	0	DELETERIOUS	C	C	T	T	T	C	C	C	C	C	C	C	T	T	T	T	C	C	C	C	C	C	C
A1bg	15	60920306	G	A	missense_variant	rs47959112	R158W	0.019	DELETERIOUS	G	G	G	G	G	G	G	G	G	G	G	G	G	G	G	G	G	A	G	G	G	G	G
A1bg	15	60921134	C	A	missense_variant	rs253384056	G16V	0.021	DELETERIOUS	C	C	C	C	C	C	C	C	C	C	C	C	C	C	C	C	C	C	C	C	C	C	C
Pde4dip	3	97695065	C	G	missense_variant	rs6155383	D2283H	0.002	DELETERIOUS	C	C	C	C	C	C	C	C	C	C	C	C	C	C	C	C	C	C	C	C	C	C	C
Pde4dip	3	97695065	C	G	missense_variant	rs6155383	D2232H	0.002	DELETERIOUS	C	C	C	C	C	C	C	C	C	C	C	C	C	C	C	C	C	C	C	C	C	C	C
Pde4dip	3	97793562	G	T	missense_variant	rs46743803	R209S	0.007	DELETERIOUS	G	G	G	G	G	G	G	G	G	G	G	G	G	G	G	G	G	T	G	G	G	G	G
Pde4dip	3	97766941	C	A	missense_variant	rs46210206	D220Y	0.021	DELETERIOUS	C	C	C	C	C	C	C	C	C	C	C	C	C	C	C	C	C	C	C	C	C	C	A
Pde4dip	3	97767144	T	C	missense_variant	rs46026372	H152R	0.022	DELETERIOUS	T	T	T	T	T	T	T	T	T	T	T	T	T	T	T	T	T	T	T	T	T	T	T
Pde4dip	3	97694022	C	T	missense_variant	rs38802370	A2360T	0.042	DELETERIOUS	C	C	C	C	C	C	C	C	C	C	C	C	C	C	C	C	C	T	C	C	C	C	T
Pde4dip	3	97694022	C	T	missense_variant	rs38802370	A2309T	0.043	DELETERIOUS	C	C	C	C	C	C	C	C	C	C	C	C	C	C	C	C	C	T	C	C	C	C	T
Pde4dip	3	97697106	C	T	missense_variant	rs37886261	R2186H	0.016	DELETERIOUS	C	C	C	C	C	C	C	C	C	C	C	C	C	C	C	C	C	C	C	C	C	C	C
Pde4dip	3	97697106	C	T	missense_variant	rs37886261	R2135H	0.017	DELETERIOUS	C	C	C	C	C	C	C	C	C	C	C	C	C	C	C	C	C	C	C	C	C	C	C
Pde4dip	3	97699850	C	T	missense_variant	rs37799538	D2039N	0.018	DELETERIOUS	C	C	C	C	C	C	C	C	C	C	C	C	C	C	C	C	C	C	C	C	C	C	C
Pde4dip	3	97699850	C	T	missense_variant	rs37799538	D2090N	0.035	DELETERIOUS	C	C	C	C	C	C	C	C	C	C	C	C	C	C	C	C	C	C	C	C	C	C	C
Pde4dip	3	97694957	G	C	missense_variant	rs37620346	Q2319E	0.021	DELETERIOUS	G	G	G	G	N	G	G	G	G	G	G	G	G	G	G	G	G	C	G	G	G	G	C
Pde4dip	3	97694957	G	C	missense_variant	rs37620346	Q2268E	0.022	DELETERIOUS	G	G	G	G	N	G	G	G	G	G	G	G	G	G	G	G	G	C	G	G	G	G	C
Pde4dip	3	97888494	C	A	missense_variant	rs263050131	W59C	0.005	DELETERIOUS (WARNING LOW CONFIDENCE)	C	C	C	C	C	C	C	C	C	C	C	C	C	C	C	C	C	C	C	C	C	C	C
Pde4dip	3	97695941	A	G	missense_variant	rs259005420	L2244P	0.02	DELETERIOUS	A	A	A	A	A	A	A	A	A	A	A	A	A	A	A	A	A	A	A	A	A	A	A
Pde4dip	3	97695941	A	G	missense_variant	rs259005420	L2193P	0.021	DELETERIOUS	A	A	A	A	A	A	A	A	A	A	A	A	A	A	A	A	A	A	A	A	A	A	A
Pde4dip	3	97719329	G	A	missense_variant	rs256007213	P1298S	0.033	DELETERIOUS	G	G	G	G	G	G	G	G	G	G	G	G	G	G	G	G	G	G	G	G	G	G	G
Pde4dip	3	97695073	A	G	missense_variant	rs252345890	L2280P	0.001	DELETERIOUS	A	A	A	A	A	A	A	A	A	A	A	A	A	A	A	A	A	A	A	A	A	A	A
Pde4dip	3	97695073	A	G	missense_variant	rs252345890	L2229P	0.001	DELETERIOUS	A	A	A	A	A	A	A	A	A	A	A	A	A	A	A	A	A	A	A	A	A	A	A
Pde4dip	3	97694914	C	A	missense_variant	rs248488546	G2333V	0.028	DELETERIOUS	C	C	C	C	C	C	C	C	C	C	C	C	C	C	C	C	C	A	C	C	C	C	C
Pde4dip	3	97694914	C	A	missense_variant	rs248488546	G2282V	0.029	DELETERIOUS	C	C	C	C	C	C	C	C	C	C	C	C	C	C	C	C	C	A	C	C	C	C	C
Pde4dip	3	97699903	T	C	missense_variant	rs213540572	E2072G	0.005	DELETERIOUS	T	T	T	T	T	T	T	T	T	T	T	T	T	T	T	T	T	T	T	T	T	T	T
Pde4dip	3	97699903	T	C	missense_variant	rs213540572	E2021G	0.005	DELETERIOUS	T	T	T	T	T	T	T	T	T	T	T	T	T	T	T	T	T	T	T	T	T	T	T
Il22ra1	4	135750673	G	A	missense_variant	rs250164759	A352T	0	DELETERIOUS (WARNING LOW CONFIDENCE)	G	G	G	G	G	G	G	G	G	G	G	G	G	G	G	G	G	G	G	G	G	G	G
Il22ra1	4	135751280	G	A	missense_variant	rs229370556	S554N	0.014	DELETERIOUS (WARNING LOW CONFIDENCE)	G	G	G	G	G	G	G	G	G	G	G	G	G	G	G	G	G	G	G	G	G	G	G
Cdh6	15	13041377	T	C	missense_variant	rs31868071	S534G	0.048	DELETERIOUS	C	C	C	C	C	C	T	C	T	C	C	T	T	C	C	C	T	C	T	C	C	C	T
Zc3h12c	9	52116230	G	A	missense_variant	rs252904847	R630C	0.019	DELETERIOUS	G	G	G	G	G	G	G	G	G	G	G	G	G	G	G	G	G	A	G	G	G	G	G
Zc3h12c	9	52144317	T	C	missense_variant	rs245619825	H64R	0.02	DELETERIOUS (WARNING LOW CONFIDENCE)	T	T	T	T	T	T	T	T	T	T	T	T	T	T	T	T	T	T	T	T	T	T	T
Scfd2	5	74530854	C	A	missense_variant	rs265474378	A256S	0	DELETERIOUS (WARNING LOW CONFIDENCE)	C	A	C	C	C	C	C	C	C	C	C	C	C	C	C	C	C	C	C	A	C	C	C
Syf2	4	134931002	C	A	missense_variant	rs27543354	A3D	0.026	DELETERIOUS (WARNING LOW CONFIDENCE)	A	C	C	C	C	C	C	C	C	C	C	C	C	C	C	C	C	C	C	A	C	C	A
Adamts5	16	85899496	G	T		rs50703099	R258S	0	DELETERIOUS	G	G	G	G	G	G	G	G	G	G	G	G	G	G	G	G	G	G	G	G	G	G	G
Adamts5	16	85899813	C	T		rs218092841	G152E	0.037	DELETERIOUS	C	C	C	C	C	C	C	C	C	C	C	C	C	C	C	C	C	C	C	C	C	C	C
Mean specific activity (nmol.mg.hour)										0.8	0.82	0.8667	0.9	1	1.02	1.05	1.08	1.06	1.06	1.075	1.08	1.1	1.1	1.1	1.5	1.5	4.167	17.52	18.1	19.63	24.04	29.4

## Sheet: alpha_glucosidase
Gene	Chr	Location (bp)	Ref_allele	Alt_allele	Functional Annotation	rsID	AA_change	SIFT_score	SIFT_prediction	RIIIS/J	NZW/Lac J	CAST/Ei J	NZB/Bl NJ	LP/J	CBA/J	MA/My J	BALB/c J	A/J	KK/Hl J	DBA/2J	BUB/Bn J	SEA/Gn J	SM/J	LG/J	BTBR T<+> Itpr3<tf>/J	C57BL/6J	AKR/J	SWR/J	C58/J	PL/J	129X1/Sv J	CE/J
Tiam2	17	3516661	C	T	missense_variant	rs33654151	T1492M	0.025	DELETERIOUS	C	C	C	C	C	C	C	C	C	C	C	T	C	C	C	C	C	T	T	C	T	T	C
Tiam2	17	3518495	C	A	missense_variant	rs258727154	P1639T	0.008	DELETERIOUS (WARNING LOW CONFIDENCE)	C	C	C	C	C	C	C	C	C	C	C	C	C	C	C	C	C	C	C	C	C	C	C
Tiam2	17	3414323	C	A	missense_variant	rs237550019	A109D	0.026	DELETERIOUS	C	C	C	C	C	C	C	C	C	C	C	C	C	C	C	C	C	C	C	C	C	C	C
Tiam2	17	3414131	G	A	missense_variant	rs231119708	G45D	0.022	DELETERIOUS	G	G	G	G	G	G	G	G	G	G	G	A	G	G	G	G	G	A	A	G	A	A	G
Mean specific activity (nmol.mg.hour)										30	32	35.33	35.8	36.67	36.6	37.33	39.8	39.6	40.67	41.2	41.33	41.6	43.4	45.5	46.8	48.8	52.4	53	53.4	61.2	64.8	68.2

## Sheet: GD1a
Gene	Chr	Location (bp)	Ref_allele	Alt_allele	Functional Annotation	rsID	AA_change	SIFT_score	SIFT_prediction	RIIIS/J	CBA/J	129X1/Sv J	LG/J	PL/J	AKR/J	SEA/Gn J	CE/J	LP/J	C57BL/6J	BTBR T<+> Itpr3<tf>/J	DBA/2J	KK/Hl J	BALB/c J	C58/J	SM/J	SWR/J	NZB/Bl NJ	MA/My J	A/J	NZW/Lac J
Ankrd55	13	112383554	C	T	missense_variant	rs218101283	S591F	0.002	DELETERIOUS (WARNING LOW CONFIDENCE)	C	C	C	C	C	C	C	C	C	C	C	C	C	C	C	C	C	C	C	C	C
Ankrd55	13	112383554	C	T	missense_variant	rs218101283	S619F	0.003	DELETERIOUS (WARNING LOW CONFIDENCE)	C	C	C	C	C	C	C	C	C	C	C	C	C	C	C	C	C	C	C	C	C
Arhgef26	3	62428939	C	G	missense_variant	rs30307036	T633R	0.002	DELETERIOUS	C	C	C	C	C	C	C	C	C	C	C	C	C	C	C	C	C	C	C	G	G
Bche	3	73701375	G	A	synonymous_variant	rs245416311	C239C	0.017	DELETERIOUS	G	G	G	G	G	G	G	G	G	G	G	G	G	G	G	G	G	G	G	G	G
Bche	3	73700919	G	T	missense_variant	rs31028178	S391R	0.02	DELETERIOUS	G	G	G	G	G	T	G	G	G	G	G	G	G	G	G	G	G	G	G	G	G
Bche	3	73700608	G	A	missense_variant	rs254312542	S495F	0.002	DELETERIOUS	G	G	G	G	G	G	G	G	G	G	G	G	G	G	G	G	G	G	G	G	G
Itgb8	12	119173376	G	A	synonymous_variant	rs33693148	H397H	0.049	DELETERIOUS	G	G	G	G	G	G	G	G	G	G	G	G	G	G	G	G	G	G	G	G	G
Itgb8	12	119237720	G	A	missense_variant	rs225648884	L27F	0.022	DELETERIOUS	G	G	G	G	G	G	G	G	G	G	G	G	G	G	G	G	G	G	G	G	G
Itgb8	12	119202410	G	C	missense_variant	rs223201135	P129A	0.01	DELETERIOUS	G	G	G	G	G	G	G	G	G	G	G	G	G	G	G	G	G	G	G	G	G
Macc1	12	119446823	C	A	missense_variant	rs30959602	P442H	0.017	DELETERIOUS	C	A	A	A	C	A	A	C	C	C	C	A	C	C	A	C	C	C	A	C	C
Macc1	12	119465464	T	C	missense_variant	rs30720559	M783T	0.003	DELETERIOUS	T	C	C	C	T	C	C	T	T	T	T	C	T	T	C	T	T	T	C	T	T
Macc1	12	119450414	C	T	missense_variant	rs30537066	S775F	0.015	DELETERIOUS	C	T	T	T	C	T	T	C	C	C	C	T	C	C	T	C	C	C	T	C	C
Serpina3c	12	104148369	G	T	missense_variant	rs8272706	S336Y	0.003	DELETERIOUS	G	G	G	G	G	G	G	G	G	G	G	G	G	G	G	G	G	G	G	G	G
Serpina3c	12	104147258	T	G	missense_variant	rs33096373	K410Q	0.004	DELETERIOUS	T	T	T	T	T	T	T	T	T	T	T	T	T	T	T	T	T	T	T	T	T
Serpina3c	12	104151825	C	T	missense_variant	rs265141266	V85M	0.037	DELETERIOUS	C	C	C	C	C	C	C	C	C	C	C	C	C	C	C	C	C	C	C	C	C
Serpina3c	12	104151725	C	T	missense_variant	rs253612054	G118E	0.038	DELETERIOUS	C	C	C	C	C	C	C	C	C	C	C	C	C	C	C	C	C	C	C	C	C
Serpina3c	12	104147372	C	G	missense_variant	rs235687019	A372P	0.006	DELETERIOUS	C	C	C	C	C	C	C	C	C	C	C	C	C	C	C	C	C	C	C	C	C
Serpina3c	12	104151848	C	T	missense_variant	rs231196776	S77N	0.002	DELETERIOUS	C	C	C	C	C	C	C	C	C	C	C	C	C	C	C	C	C	C	C	C	C
Serpini2	3	75259656	T	A	missense_variant	rs250159092	K98M	0.039	DELETERIOUS	A	T	T	T	T	T	T	T	T	T	A	T	A	T	T	T	A	A	A	T	T
Serpini2	3	75267864	G	A	missense_variant	rs228390848	S40F	0.014	DELETERIOUS	G	G	G	G	G	G	G	G	G	G	G	G	G	G	G	G	G	G	G	G	G
Serpini2	3	75267764	C	G	missense_variant	rs224724423	K73N	0.023	DELETERIOUS	C	C	C	C	C	C	C	C	C	C	C	C	C	C	C	C	C	C	C	C	C
Mean specific activity (nmol.mg.hour)										0.00176	0.0022	0.002356	0.002384	0.002393	0.002446	0.002466	0.002538	0.00254	0.002647	0.002833	0.002883	0.002913	0.00332	0.003463	0.003535	0.003965	0.00424	0.004295	0.005867	0.0074

## Sheet: GD1b
Gene	Chr	Location (bp)	Ref_allele	Alt_allele	Functional Annotation	rsID	AA_change	SIFT_score	SIFT_prediction	SM/J	PL/J	AKR/J	KK/Hl J	LG/J	RIIIS/J	BTBR T<+> Itpr3<tf>/J	NZB/Bl NJ	LP/J	CBA/J	129X1/Sv J	BALB/c J	DBA/2J	MA/My J	SWR/J	SEA/Gn J	NZW/Lac J	C57BL/6J	CE/J	A/J	C58/J
Ahctf1	1	179789672	C	T	missense_variant	rs32656725	A315T	0	DELETERIOUS	C	C	C	C	C	C	C	C	C	C	C	C	C	C	C	C	C	C	C	C	C
Ahctf1	1	179748673	C	T	missense_variant	rs32652758	A39T	0	DELETERIOUS (WARNING LOW CONFIDENCE)	C	C	T	C	C	C	C	C	C	C	C	C	C	C	C	C	C	C	C	C	C
Ahctf1	1	179746454	A	T	missense_variant	rs243947634	V2204E	0.014	DELETERIOUS	A	A	A	A	A	A	A	A	A	A	A	A	A	A	A	A	A	A	A	A	A
Ahctf1	1	179777768	C	T	missense_variant	rs243507489	D734N	0.022	DELETERIOUS	C	C	T	C	C	C	C	C	C	C	C	C	C	C	C	C	C	C	C	C	C
Ahctf1	1	179748672	G	T	missense_variant	rs230454589	A39E	0	DELETERIOUS (WARNING LOW CONFIDENCE)	G	G	G	G	G	G	G	G	G	G	G	G	G	G	G	G	G	G	G	G	G
Ahctf1	1	179753162	G	A	missense_variant	rs222561948	P1825L	0.021	DELETERIOUS	G	G	G	G	G	G	G	G	G	G	G	G	G	G	G	G	G	G	G	G	G
Pard3b	1	62637853	G	A	missense_variant	rs47717251	S1181N	0.024	DELETERIOUS (WARNING LOW CONFIDENCE)	A	A	A	A	A	A	A	G	A	A	A	G	A	A	G	G	A	G	A	A	G
Pard3b	1	62637853	G	A	missense_variant	rs47717251	S1119N	0.029	DELETERIOUS (WARNING LOW CONFIDENCE)	A	A	A	A	A	A	A	G	A	A	A	G	A	A	G	G	A	G	A	A	G
Pard3b	1	62637853	G	A	missense_variant	rs47717251	S1082N	0.03	DELETERIOUS (WARNING LOW CONFIDENCE)	A	A	A	A	A	A	A	G	A	A	A	G	A	A	G	G	A	G	A	A	G
Pard3b	1	62238890	C	T	missense_variant	rs29899543	T693M	0.025	DELETERIOUS	C	C	C	C	C	C	C	C	C	C	C	C	C	C	C	C	C	C	C	C	T
Pard3b	1	62238890	C	T	missense_variant	rs29899543	T631M	0.029	DELETERIOUS	C	C	C	C	C	C	C	C	C	C	C	C	C	C	C	C	C	C	C	C	T
Pard3b	1	62440053	G	C	missense_variant	rs250651042	Q829H	0.014	DELETERIOUS	G	G	G	G	G	G	G	G	G	G	G	G	G	G	G	G	G	G	G	G	G
Pard3b	1	62440053	G	C	missense_variant	rs250651042	Q891H	0.024	DELETERIOUS	G	G	G	G	G	G	G	G	G	G	G	G	G	G	G	G	G	G	G	G	G
Pard3b	1	62532655	A	T	missense_variant	rs243152199	M955L	0.027	DELETERIOUS	A	A	A	A	A	A	A	A	A	A	A	A	A	A	A	A	A	A	A	A	A
Pard3b	1	62532655	A	T	missense_variant	rs243152199	M1017L	0.027	DELETERIOUS	A	A	A	A	A	A	A	A	A	A	A	A	A	A	A	A	A	A	A	A	A
Pard3b	1	62532659	C	T	missense_variant	rs212159906	A956V	0.026	DELETERIOUS	C	C	C	C	C	C	C	C	C	C	C	C	C	C	C	C	C	C	C	C	C
Pard3b	1	62532659	C	T	missense_variant	rs212159906	A1018V	0.026	DELETERIOUS	C	C	C	C	C	C	C	C	C	C	C	C	C	C	C	C	C	C	C	C	C
Cdc42bpa	1	180138496	A	C	missense_variant	rs32676625	K1018T	0.002	DELETERIOUS	N	N	A	C	A	A	A	A	N	N	A	N	A	A	A	N	A	A	N	A	A
Cdc42bpa	1	180138496	A	C	missense_variant	rs32676625	K1099T	0.002	DELETERIOUS	N	N	A	C	A	A	A	A	N	N	A	N	A	A	A	N	A	A	N	A	A
Cdc42bpa	1	180138496	A	C	missense_variant	rs32676625	K1071T	0.002	DELETERIOUS	N	N	A	C	A	A	A	A	N	N	A	N	A	A	A	N	A	A	N	A	A
Cdc42bpa	1	180138496	A	C	missense_variant	rs32676625	K1112T	0.002	DELETERIOUS	N	N	A	C	A	A	A	A	N	N	A	N	A	A	A	N	A	A	N	A	A
Cdc42bpa	1	180138496	A	C	missense_variant	rs32676625	K427T	0.002	DELETERIOUS	N	N	A	C	A	A	A	A	N	N	A	N	A	A	A	N	A	A	N	A	A
Cdc42bpa	1	180138496	A	C	missense_variant	rs32676625	K301T	0.002	DELETERIOUS	N	N	A	C	A	A	A	A	N	N	A	N	A	A	A	N	A	A	N	A	A
Tmem74b	2	151706869	T	C	missense_variant	rs27352660	M172T	0.001	DELETERIOUS	N	N	N	T	T	N	T	N	N	N	N	N	N	T	N	N	N	T	N	N	N
Tmem74b	2	151707037	C	A	missense_variant	rs231613762	T228N	0.043	DELETERIOUS (WARNING LOW CONFIDENCE)	C	C	C	C	C	C	C	C	C	C	C	C	C	C	C	C	C	C	C	C	C
Gss	2	155567706	T	C	missense_variant	rs217121421	Y339C	0.001	DELETERIOUS	T	T	T	T	T	T	T	T	T	T	T	T	T	T	T	T	T	T	T	T	T
Gss	2	155567706	T	C	missense_variant	rs217121421	Y270C	0.026	DELETERIOUS	T	T	T	T	T	T	T	T	T	T	T	T	T	T	T	T	T	T	T	T	T
Dlgap4	2	156749165	C	T	missense_variant	rs387031440	A80V	0.016	DELETERIOUS	C	C	C	C	C	C	C	C	C	C	C	C	C	C	T	C	C	C	C	C	C
Dlgap4	2	156749165	C	T	missense_variant	rs387031440	A67V	0.026	DELETERIOUS	C	C	C	C	C	C	C	C	C	C	C	C	C	C	T	C	C	C	C	C	C
Dlgap4	2	156749165	C	T	missense_variant	rs387031440	A757V	0.027	DELETERIOUS	C	C	C	C	C	C	C	C	C	C	C	C	C	C	T	C	C	C	C	C	C
Dlgap4	2	156749165	C	T	missense_variant	rs387031440	A774V	0.033	DELETERIOUS	C	C	C	C	C	C	C	C	C	C	C	C	C	C	T	C	C	C	C	C	C
Dlgap4	2	156749165	C	T	missense_variant	rs387031440	A771V	0.037	DELETERIOUS	C	C	C	C	C	C	C	C	C	C	C	C	C	C	T	C	C	C	C	C	C
Ppt1	4	122849659	C	A	missense_variant	rs242253072	P197T	0	DELETERIOUS (WARNING LOW CONFIDENCE)	C	C	C	C	C	C	C	C	C	C	C	C	C	C	C	C	C	C	C	C	C
Gpr151	18	42578872	A	C	missense_variant	rs31864076	M247R	0.02	DELETERIOUS	A	A	A	A	A	A	A	A	A	A	A	A	A	A	A	A	A	A	A	A	A
Gpr151	18	42578801	A	G	missense_variant	rs256971063	W271R	0.043	DELETERIOUS	A	A	A	A	A	A	A	A	A	A	A	A	A	A	A	A	A	A	A	A	A
Gpr151	18	42578828	T	A	missense_variant	rs233191627	I262F	0.014	DELETERIOUS	T	T	T	T	T	T	T	T	T	T	T	T	T	T	T	T	T	T	T	T	T
Mean specific activity (nmol.mg.hour)										0	0.000425	0.000475	0.0005	0.0006	0.00075	0.0008	0.00094	0.001125	0.001333	0.0014	0.00188	0.002575	0.003025	0.00316	0.0036	0.0039	0.004	0.004625	0.0066	0.0102

## Sheet: GA2
Gene	Chr	Location (bp)	Ref_allele	Alt_allele	Functional Annotation	rsID	AA_change	SIFT_score	SIFT_prediction	NZW/Lac J	CBA/J	DBA/2J	NZB/Bl NJ	RIIIS/J	PL/J	KK/Hl J	LG/J	MA/My J	SWR/J	AKR/J	SEA/Gn J	129X1/Sv J	BALB/c J	C57BL/6J	C58/J	SM/J	LP/J	BTBR T<+> Itpr3<tf>/J	CE/J	A/J
Abca15	7	120401748	G	A	synonymous_variant	rs236115988	T1502T	0.018	DELETERIOUS	G	G	G	G	G	G	G	G	G	G	G	G	G	G	G	G	G	G	G	G	G
Abca15	7	120406951	A	G	missense_variant	rs32622186	Q1612R	0.01	DELETERIOUS	A	A	A	A	A	A	A	A	A	A	A	A	A	A	A	A	A	A	A	A	G	*
Abca15	7	120403021	G	A	missense_variant	rs32616263	A1586T	0.037	DELETERIOUS	G	G	G	G	G	G	G	G	G	G	G	G	G	G	G	G	G	G	G	G	G
Abca15	7	120361398	C	G	missense_variant	rs256179463	S694R	0.037	DELETERIOUS	C	C	C	C	C	C	C	C	C	C	C	C	C	C	C	C	C	C	C	C	C
Abca15	7	120406974	T	C	missense_variant	rs217525262	Y1620H	0	DELETERIOUS	T	T	T	T	T	T	T	T	T	T	T	T	T	T	T	T	T	T	T	T	T
Abca16	7	120453017	T	A	missense_variant	rs261243253	F435Y	0.004	DELETERIOUS	T	T	T	T	T	T	T	T	T	T	T	T	T	T	T	T	T	T	T	T	T
Abca16	7	120453017	T	A	missense_variant	rs261243253	F436Y	0.004	DELETERIOUS	T	T	T	T	T	T	T	T	T	T	T	T	T	T	T	T	T	T	T	T	T
Abca16	7	120477311	C	T	missense_variant	rs216943487	A645V	0.005	DELETERIOUS	C	C	C	C	C	C	C	C	C	C	C	C	C	C	C	C	C	C	C	C	C
Abca16	7	120477311	C	T	missense_variant	rs216943487	A646V	0.005	DELETERIOUS	C	C	C	C	C	C	C	C	C	C	C	C	C	C	C	C	C	C	C	C	C
Abcb5	12	118940546	C	A		rs253646064	G170C	0.001	DELETERIOUS	A	C	C	A	C	C	C	C	C	C	C	C	C	C	C	C	C	C	C	A	C
Abcb5	12	118940459	A	T		rs245000647	G170G	0.036	DELETERIOUS	A	A	A	A	A	A	A	A	A	A	A	A	A	A	A	A	A	A	A	A	A
Abcb5	12	118940568	A	G	synonymous_variant	rs240658340	C162C	0.021	DELETERIOUS	A	A	A	A	A	A	A	A	A	A	A	A	A	A	A	A	A	A	A	A	A
Abcb5	12	118901387	C	A	synonymous_variant	rs232127286	T798T	0.025	DELETERIOUS	C	C	C	C	C	C	C	C	C	C	C	C	C	C	C	C	C	C	C	C	C
Abcb5	12	118918137	G	A	missense_variant	rs33678344	S619F	0.04	DELETERIOUS	A	G	G	A	G	G	G	G	G	G	G	G	G	G	G	G	G	G	G	A	G
Abcb5	12	118918240	A	C	missense_variant	rs30781912	S585A	0.031	DELETERIOUS	A	A	A	A	A	A	A	A	A	A	A	A	A	A	A	A	A	A	A	A	C	*
Abcb5	12	118940718	A	C	missense_variant	rs226181719	I112M	0.039	DELETERIOUS	A	A	A	A	A	A	A	A	A	A	A	A	A	A	A	A	A	A	A	A	A
Abcb5	12	118940554	C	T	missense_variant	rs223978783	R167H	0.001	DELETERIOUS	C	C	C	C	C	C	C	C	C	C	C	C	C	C	C	C	C	C	C	C	C
Acsl1	8	46519004	C	T	synonymous_variant	rs244777537	N296N	0.01	DELETERIOUS	C	C	C	C	C	C	C	C	C	C	C	C	C	C	C	C	C	C	C	C	C
Acsl1	8	46519001	A	G	missense_variant	rs224770781	I295M	0.034	DELETERIOUS	A	A	A	A	A	A	A	A	A	A	A	A	A	A	A	A	A	A	A	A	A
Adam6a	12	113546269	A	G	missense_variant	rs29180320	K754R	0	DELETERIOUS (WARNING LOW CONFIDENCE)	A	A	A	A	G	A	G	A	G	A	A	G	G	G	A	G	A	A	A	A	A
Ahnak	19	9013385	T	C	missense_variant	rs37153911	I4011T	0.031	DELETERIOUS	T	N	T	N	N	N	T	T	N	N	T	T	T	N	T	T	N	N	T	N	T
Ahnak	19	9013839	G	C	missense_variant	rs37041541	K4162N	0.018	DELETERIOUS	G	N	G	N	N	N	G	G	N	N	G	G	G	N	G	G	N	N	G	N	G
Ahnak	19	9002591	G	A	missense_variant	rs36940377	S413N	0.049	DELETERIOUS (WARNING LOW CONFIDENCE)	G	G	G	G	G	G	G	G	G	G	G	G	G	G	G	G	G	G	G	G	G
Ahnak	19	9016729	A	C	missense_variant	rs257894997	K5126Q	0.027	DELETERIOUS (WARNING LOW CONFIDENCE)	A	A	A	A	A	A	A	A	A	A	A	A	A	A	A	A	A	A	A	A	A
Ahnak	19	9015103	A	C	missense_variant	rs256553721	K4584Q	0.023	DELETERIOUS	A	A	A	A	A	A	A	A	A	A	A	A	A	A	A	A	A	A	A	A	A
Ahnak	19	9010351	C	T	missense_variant	rs251582946	P3000S	0.007	DELETERIOUS	C	C	C	C	C	C	C	C	C	C	C	C	C	C	C	C	C	C	C	C	C
Ahnak	19	9016663	C	A	missense_variant	rs251504153	L5104M	0.033	DELETERIOUS (WARNING LOW CONFIDENCE)	C	C	C	C	C	C	C	C	C	C	C	C	C	C	C	C	C	C	C	C	C
Ahnak	19	9003649	C	A	missense_variant	rs241487640	P766T	0.005	DELETERIOUS (WARNING LOW CONFIDENCE)	C	C	C	C	C	C	C	C	C	C	C	C	C	C	C	C	C	C	C	C	C
Ahnak	19	9007906	G	A	missense_variant	rs240810017	D2185N	0.015	DELETERIOUS	G	G	G	G	G	G	G	G	G	G	G	G	G	G	G	G	G	G	G	G	G
Ahnak	19	9037199	A	C	missense_variant	rs239432693	N129T	0	DELETERIOUS (WARNING LOW CONFIDENCE)	A	A	A	A	A	A	A	A	A	A	A	A	A	A	A	A	A	A	A	A	A
Ahnak	19	9005591	T	C	missense_variant	rs239148554	V1413A	0.005	DELETERIOUS	T	T	T	T	T	T	T	T	T	T	T	T	T	T	T	T	T	T	T	T	T
Ahnak	19	9013961	C	T	missense_variant	rs228399027	T4203I	0.046	DELETERIOUS	C	C	C	C	C	C	C	C	C	C	C	C	C	C	C	C	C	C	C	C	C
Ahnak	19	9015355	C	A	missense_variant	rs223353187	L4668M	0.028	DELETERIOUS	C	C	C	C	C	C	C	C	C	C	C	C	C	C	C	C	C	C	C	C	C
Ahnak	19	9002054	C	T	missense_variant	rs221549288	S234L	0.013	DELETERIOUS (WARNING LOW CONFIDENCE)	C	C	C	C	C	C	C	C	C	C	C	C	C	C	C	C	C	C	C	C	C
Ahnak	19	9008530	C	A	missense_variant	rs212579186	P2393T	0.006	DELETERIOUS	C	C	C	C	C	C	C	C	C	C	C	C	C	C	C	C	C	C	C	C	C
Arhgap17	7	123318475	G	A	missense_variant	rs32799789	S162L	0.001	DELETERIOUS	G	G	G	G	G	G	G	G	G	G	G	G	G	G	G	G	G	G	G	G	G
Bdp1	13	100051406	G	A	stop_gained	rs244333568	A1557V	0.027	DELETERIOUS	G	G	G	G	G	G	G	G	G	G	G	G	G	G	G	G	G	G	G	G	G
Bdp1	13	100051039	T	G	missense_variant	rs48823997	N1607H	0.034	DELETERIOUS	T	T	T	T	T	T	T	T	T	T	T	N	N	T	T	T	T	T	T	T	T
Bdp1	13	100043777	T	A	missense_variant	rs258963209	I1845F	0.043	DELETERIOUS	T	T	T	T	T	T	T	T	T	T	T	T	T	T	T	T	T	T	T	T	T
Bdp1	13	100055119	C	T	missense_variant	rs254881880	E1451K	0.03	DELETERIOUS	C	C	C	C	C	C	C	C	C	C	C	C	C	C	C	C	C	C	C	C	C
Bdp1	13	100103642	T	G	missense_variant	rs254415408	Q66P	0.027	DELETERIOUS	T	T	T	T	T	T	T	T	T	T	T	T	T	T	T	T	T	T	T	T	T
Bdp1	13	100035245	T	G	missense_variant	rs242023727	Q2118H	0.015	DELETERIOUS	T	T	T	T	T	T	T	T	T	T	T	T	T	T	T	T	T	T	T	T	T
Bdp1	13	100046784	T	A	missense_variant	rs232718409	H1788L	0.007	DELETERIOUS	T	T	T	T	T	T	T	T	T	T	T	T	T	T	T	T	T	T	T	T	T
Bdp1	13	100025442	T	A	missense_variant	rs227385231	E2324V	0.007	DELETERIOUS	T	T	T	T	T	T	T	T	T	T	T	T	T	T	T	T	T	T	T	T	T
Cacnb3	15	98642362	T	C	synonymous_variant	rs8266891	T315T	0.045	DELETERIOUS	T	T	T	T	T	T	T	T	T	T	T	T	T	T	T	T	T	T	T	T	T
Cacnb3	15	98642362	T	C	synonymous_variant	rs8266891	T316T	0.047	DELETERIOUS	T	T	T	T	T	T	T	T	T	T	T	T	T	T	T	T	T	T	T	T	T
Ccdc184	15	98168682	C	A	missense_variant	rs225945605	P123T	0	DELETERIOUS (WARNING LOW CONFIDENCE)	C	C	C	C	C	C	C	C	C	C	C	C	C	C	C	C	C	C	C	C	C
Ccdc184	15	98168763	G	A	missense_variant	rs219888970	A150T	0	DELETERIOUS (WARNING LOW CONFIDENCE)	G	G	G	G	G	G	G	G	G	G	G	G	G	G	G	G	G	G	G	G	G
Cdc42bpb	12	111303852	C	T	missense_variant	rs29145242	R1171Q	0.008	DELETERIOUS	C	C	C	C	C	C	C	C	C	C	C	C	C	C	C	C	C	C	C	C	T	*
Cdh6	15	13041377	T	C	missense_variant	rs31868071	S534G	0.048	DELETERIOUS	C	C	C	C	C	C	T	T	C	C	T	C	C	C	T	T	T	C	C	C	T
Chchd6	6	89467434	G	A	missense_variant	rs13474057	R189C	0.007	DELETERIOUS	A	A	A	A	A	G	A	G	A	G	G	G	A	G	G	A	A	A	A	G	A
Col2a1	15	97984733	G	A	missense_variant	rs226262171	T727I	0.022	DELETERIOUS	G	G	G	G	G	G	G	G	G	G	G	G	G	G	G	G	G	G	G	G	G
Col2a1	15	97984733	G	A	missense_variant	rs226262171	T659I	0.023	DELETERIOUS	G	G	G	G	G	G	G	G	G	G	G	G	G	G	G	G	G	G	G	G	G
Coro7	16	4628260	C	T	missense_variant	rs238246985	R867H	0.019	DELETERIOUS	C	C	C	C	C	C	C	C	C	C	C	C	C	C	C	C	C	C	C	C	C
Cped1	6	22254571	C	T	missense_variant	rs231256644	H988Y	0.011	DELETERIOUS	C	C	C	C	C	C	C	C	C	C	C	C	C	C	C	C	C	C	C	C	C
D630003M21Rik	2	158186249	G	A	missense_variant	rs49402512	S1077L	0.017	DELETERIOUS (WARNING LOW CONFIDENCE)	A	G	A	G	G	G	G	A	A	G	A	G	A	G	G	A	A	A	G	G	G
D630003M21Rik	2	158196473	G	A	missense_variant	rs29538638	R1018W	0.006	DELETERIOUS	A	G	A	G	G	G	G	A	A	G	A	G	A	G	G	A	A	A	G	G	G
D630003M21Rik	2	158196040	C	T	missense_variant	rs27320417	G1162E	0.013	DELETERIOUS (WARNING LOW CONFIDENCE)	C	C	C	C	C	C	C	C	C	C	C	C	C	C	C	C	C	C	C	C	C
D630003M21Rik	2	158200281	G	A	missense_variant	rs27320381	P915L	0	DELETERIOUS	G	G	G	G	G	G	G	G	G	G	G	G	G	G	G	G	G	G	G	G	G
D630003M21Rik	2	158204676	C	T	missense_variant	rs27320348	A794T	0.028	DELETERIOUS	C	C	C	C	T	C	T	C	C	C	C	C	C	C	C	C	C	C	C	T	T
D630003M21Rik	2	158210212	G	A	missense_variant	rs264466668	P653L	0	DELETERIOUS	G	G	G	G	G	G	G	G	G	G	G	G	G	G	G	G	G	G	G	G	G
D630003M21Rik	2	158216585	G	A	missense_variant	rs249862075	S465F	0.021	DELETERIOUS	A	G	G	A	G	G	G	G	G	G	G	G	G	G	G	G	G	G	G	G	G	*
D630003M21Rik	2	158215885	G	A	missense_variant	rs243989060	P558S	0.037	DELETERIOUS	G	G	G	G	G	G	G	G	G	G	G	G	G	G	G	G	G	G	G	G	G
D630003M21Rik	2	158200296	C	T	missense_variant	rs238799401	G910D	0.044	DELETERIOUS (WARNING LOW CONFIDENCE)	C	C	C	C	C	C	C	C	C	C	C	C	C	C	C	C	C	C	C	C	C
D630003M21Rik	2	158208490	C	T	missense_variant	rs233698990	V691M	0	DELETERIOUS	C	C	C	C	C	C	C	C	C	C	C	C	C	C	C	C	C	C	C	C	C
D630003M21Rik	2	158210213	G	A	missense_variant	rs228205160	P653S	0	DELETERIOUS	G	G	G	G	G	G	G	G	G	G	G	G	G	G	G	G	G	G	G	G	G
Dner	1	84445485	C	A	missense_variant	rs30252663	A466S	0.011	DELETERIOUS	C	C	C	C	C	C	C	C	C	C	C	C	C	C	C	C	C	C	C	C	C
Dner	1	84585540	G	A	missense_variant	rs222839583	L120F	0.017	DELETERIOUS	G	G	G	G	G	G	G	G	G	G	G	G	G	G	G	G	G	G	G	G	G
Dner	1	84585494	G	A	missense_variant	rs218117729	P135L	0.041	DELETERIOUS	G	G	G	G	G	G	G	G	G	G	G	G	G	G	G	G	G	G	G	G	G
Eef2k	7	120903347	T	C	missense_variant	rs32653122	Y711H	0	DELETERIOUS	T	N	N	N	N	N	N	C	N	N	C	N	N	N	T	N	N	N	N	N	T
Eef2k	7	120899519	G	A	missense_variant	rs263449220	G590R	0.032	DELETERIOUS	G	G	G	G	G	G	G	G	G	G	G	G	G	G	G	G	G	G	G	G	G
Eef2k	7	120899519	G	A	missense_variant	rs263449220	G680R	0.037	DELETERIOUS	G	G	G	G	G	G	G	G	G	G	G	G	G	G	G	G	G	G	G	G	G
Eef2k	7	120880396	G	A	missense_variant	rs108231462	V179M	0.013	DELETERIOUS	G	G	G	G	G	G	G	G	G	G	G	G	G	G	G	G	G	G	G	G	A	*
Efcc1	6	87753077	G	T	missense_variant	rs38644586	E457D	0.009	DELETERIOUS	G	G	G	G	G	G	G	G	G	G	G	T	G	G	G	G	G	G	G	G	G
Efcc1	6	87753077	G	T	missense_variant	rs38644586	E456D	0.043	DELETERIOUS	G	G	G	G	G	G	G	G	G	G	G	T	G	G	G	G	G	G	G	G	G
Efcc1	6	87754755	A	T	missense_variant	rs37770686	T526S	0.043	DELETERIOUS	A	A	A	A	A	A	A	A	A	A	A	T	A	A	A	A	A	A	A	A	A
Efcc1	6	87754755	A	T	missense_variant	rs37770686	T525S	0.044	DELETERIOUS	A	A	A	A	A	A	A	A	A	A	A	T	A	A	A	A	A	A	A	A	A
Efcc1	6	87732822	G	T	missense_variant	rs250442261	R266L	0.003	DELETERIOUS	G	G	G	G	G	T	G	T	G	G	T	G	G	T	G	G	G	G	G	G	G
Efcc1	6	87753121	G	A	missense_variant	rs232222837	R472Q	0.017	DELETERIOUS	G	G	G	G	G	A	G	A	G	G	A	G	G	A	G	G	G	G	G	G	G
Efcc1	6	87753121	G	A	missense_variant	rs232222837	R471Q	0.019	DELETERIOUS	G	G	G	G	G	A	G	A	G	G	A	G	G	A	G	G	G	G	G	G	G
Efcc1	6	87731146	C	G	missense_variant	rs229361692	T85R	0.019	DELETERIOUS	C	C	C	C	C	C	C	C	C	C	C	G	C	C	C	C	C	C	C	C	C
Efcc1	6	87753796	C	T	missense_variant	rs13478878	P512L	0.037	DELETERIOUS	C	C	C	C	C	C	C	C	C	C	C	C	C	C	C	C	C	C	T	C	T	*
Efcc1	6	87753796	C	T	missense_variant	rs13478878	P511L	0.037	DELETERIOUS	C	C	C	C	C	C	C	C	C	C	C	C	C	C	C	C	C	C	T	C	T	*
Ern2	7	122177348	G	A	missense_variant	rs257689065	S383F	0.029	DELETERIOUS	G	G	G	G	G	G	G	G	G	G	G	G	G	G	G	G	G	G	G	G	G
Ern2	7	122186085	A	C	missense_variant	rs224428723	L23W	0.027	DELETERIOUS	A	A	A	A	A	A	A	A	A	A	A	A	A	A	A	A	A	A	A	A	A
F2rl1	13	95513613	G	T	missense_variant	rs4229990	L254M	0.03	DELETERIOUS	G	G	G	G	G	G	G	G	G	G	G	G	G	G	G	G	G	G	G	G	G
F2rl1	13	95513974	C	G	missense_variant	rs250352005	K133N	0.003	DELETERIOUS	G	G	G	G	C	G	C	G	C	G	G	G	G	G	C	C	G	G	G	C	G
F2rl1	13	95513976	T	C	missense_variant	rs237335079	K133E	0.005	DELETERIOUS	C	C	C	C	T	C	T	C	T	C	C	C	C	C	T	T	C	C	C	T	C
F2rl1	13	95513975	T	G	missense_variant	rs219013617	K133T	0.004	DELETERIOUS	G	G	G	G	T	G	T	G	T	G	G	G	G	G	T	T	G	G	G	T	G
Fcmr	1	130874363	C	T	missense_variant	rs266048355	T118I	0.005	DELETERIOUS	C	C	C	C	C	C	C	C	C	C	C	C	C	C	C	C	C	C	C	C	C
Fcmr	1	130880497	A	G	missense_variant	rs253794438	H372R	0.049	DELETERIOUS	A	A	A	A	A	A	A	A	A	A	A	A	A	A	A	A	A	A	A	A	A
Fcmr	1	130874323	G	A	missense_variant	rs253759189	V105M	0.032	DELETERIOUS	G	G	G	G	G	G	G	G	G	G	G	G	G	G	G	G	G	G	G	G	G
Fcmr	1	130874302	G	A	missense_variant	rs228911207	D98N	0.047	DELETERIOUS	G	G	G	G	G	G	G	G	G	G	G	G	G	G	G	G	G	G	G	G	G
Fcmr	1	130875066	C	T	missense_variant	rs221380187	P139S	0	DELETERIOUS	C	C	C	C	C	C	C	C	C	C	C	C	C	C	C	C	C	C	C	C	C
Kif26a	12	112174833	C	T	missense_variant	rs29212376	T690I	0.01	DELETERIOUS	C	T	T	C	C	T	C	C	C	T	T	C	C	C	C	C	C	C	C	T	C
Kif26a	12	112177574	G	A	missense_variant	rs245629460	V1421M	0.042	DELETERIOUS	G	G	G	G	G	G	G	G	G	G	G	G	G	G	G	G	G	G	G	G	G
Kif26a	12	112176213	G	C	missense_variant	rs233722455	S967T	0.041	DELETERIOUS	G	G	G	G	G	G	G	G	G	G	G	G	G	G	G	G	G	G	G	G	G
Krt80	15	101352245	C	A	missense_variant	rs239259911	V255L	0.017	DELETERIOUS	C	C	C	C	C	C	C	C	C	C	C	C	C	C	C	C	C	C	C	C	C
Macf1	4	123459386	T	C		rs259471812	D1594G	0.014	DELETERIOUS	T	T	T	T	T	T	T	T	T	T	T	T	T	T	T	T	T	T	T	T	T
Macf1	4	123459386	T	C		rs259471812	D1745G	0.041	DELETERIOUS	T	T	T	T	T	T	T	T	T	T	T	T	T	T	T	T	T	T	T	T	T
Macf1	4	123368828	C	T	missense_variant	rs27568876	C5101Y	0.012	DELETERIOUS (WARNING LOW CONFIDENCE)	C	C	C	C	T	C	C	C	C	C	C	C	C	C	C	C	C	C	C	C	C	*
Macf1	4	123368828	C	T	missense_variant	rs27568876	C4951Y	0.015	DELETERIOUS (WARNING LOW CONFIDENCE)	C	C	C	C	T	C	C	C	C	C	C	C	C	C	C	C	C	C	C	C	C	*
Macf1	4	123374884	C	T	missense_variant	rs27568856	V4650I	0.011	DELETERIOUS	C	C	C	C	C	C	C	C	C	C	C	C	C	C	C	C	C	C	C	C	C
Macf1	4	123374884	C	T	missense_variant	rs27568856	V4800I	0.015	DELETERIOUS	C	C	C	C	C	C	C	C	C	C	C	C	C	C	C	C	C	C	C	C	C
Macf1	4	123432960	C	A	missense_variant	rs27553649	A2890S	0.005	DELETERIOUS	C	C	C	C	A	C	C	C	C	C	C	C	C	C	C	C	C	C	C	C	C	*
Macf1	4	123432960	C	A	missense_variant	rs27553649	A3040S	0.006	DELETERIOUS	C	C	C	C	A	C	C	C	C	C	C	C	C	C	C	C	C	C	C	C	C	*
Macf1	4	123489359	C	G	missense_variant	rs27553440	E1271Q	0.01	DELETERIOUS	C	C	C	C	G	C	C	C	C	C	C	C	C	C	C	C	C	C	C	C	C	*
Macf1	4	123489359	C	G	missense_variant	rs27553440	E1422Q	0.014	DELETERIOUS	C	C	C	C	G	C	C	C	C	C	C	C	C	C	C	C	C	C	C	C	C	*
Macf1	4	123492722	G	C	missense_variant	rs27553423	A1128G	0	DELETERIOUS	G	G	G	G	G	G	G	G	G	G	G	G	G	G	G	G	G	G	G	G	G
Macf1	4	123492722	G	C	missense_variant	rs27553423	A1279G	0.001	DELETERIOUS	G	G	G	G	G	G	G	G	G	G	G	G	G	G	G	G	G	G	G	G	G
Macf1	4	123456610	T	C	missense_variant	rs257501770	K1793R	0.005	DELETERIOUS	T	T	T	T	T	T	T	T	T	T	T	T	T	T	T	T	T	T	T	T	T
Macf1	4	123456610	T	C	missense_variant	rs257501770	K1943R	0.007	DELETERIOUS	T	T	T	T	T	T	T	T	T	T	T	T	T	T	T	T	T	T	T	T	T
Macf1	4	123450060	G	T	missense_variant	rs255493702	T2217K	0.01	DELETERIOUS	G	G	G	G	G	G	G	G	G	G	G	G	G	G	G	G	G	G	G	G	G
Macf1	4	123450060	G	T	missense_variant	rs255493702	T2367K	0.01	DELETERIOUS	G	G	G	G	G	G	G	G	G	G	G	G	G	G	G	G	G	G	G	G	G
Macf1	4	123459311	T	C	missense_variant	rs252195654	E1770G	0.001	DELETERIOUS	T	T	T	T	T	T	T	T	T	T	T	T	T	T	T	T	T	T	T	T	T
Macf1	4	123459311	T	C	missense_variant	rs252195654	E1619G	0.002	DELETERIOUS	T	T	T	T	T	T	T	T	T	T	T	T	T	T	T	T	T	T	T	T	T
Macf1	4	123456664	T	C	missense_variant	rs246346668	H1925R	0.01	DELETERIOUS	T	T	T	T	T	T	T	T	T	T	T	T	T	T	T	T	T	T	T	T	T
Macf1	4	123456664	T	C	missense_variant	rs246346668	H1775R	0.047	DELETERIOUS	T	T	T	T	T	T	T	T	T	T	T	T	T	T	T	T	T	T	T	T	T
Macf1	4	123490705	A	G	missense_variant	rs227554769	V1227A	0.003	DELETERIOUS	A	A	A	A	A	A	A	A	A	A	A	A	A	A	A	A	A	A	A	A	A
Macf1	4	123490705	A	G	missense_variant	rs227554769	V1378A	0.005	DELETERIOUS	A	A	A	A	A	A	A	A	A	A	A	A	A	A	A	A	A	A	A	A	A
Macf1	4	123456640	T	C	missense_variant	rs226463178	Q1933R	0.009	DELETERIOUS	T	T	T	T	T	T	T	T	T	T	T	T	T	T	T	T	T	T	T	T	T
Macf1	4	123456640	T	C	missense_variant	rs226463178	Q1783R	0.026	DELETERIOUS	T	T	T	T	T	T	T	T	T	T	T	T	T	T	T	T	T	T	T	T	T
Macf1	4	123526697	C	T	missense_variant	rs223796245	G255R	0.009	DELETERIOUS (WARNING LOW CONFIDENCE)	C	C	C	C	C	C	C	C	C	C	C	C	C	C	C	C	C	C	C	C	C
Macf1	4	123432569	T	G	missense_variant	rs216608577	D3020A	0.006	DELETERIOUS	T	T	T	T	T	T	T	T	T	T	T	T	T	T	T	T	T	T	T	T	T
Macf1	4	123432569	T	G	missense_variant	rs216608577	D3170A	0.007	DELETERIOUS	T	T	T	T	T	T	T	T	T	T	T	T	T	T	T	T	T	T	T	T	T
Marveld2	13	100616771	G	A	missense_variant	rs234583739	S47L	0.016	DELETERIOUS	G	G	G	G	G	G	G	G	G	G	G	G	G	G	G	G	G	G	G	G	G
Marveld2	13	100616822	T	C	missense_variant	rs220850997	E30G	0	DELETERIOUS	T	T	T	T	T	T	T	T	T	T	T	T	T	T	T	T	T	T	T	T	T
Mfsd13b	7	120991431	T	G	missense_variant	rs6287219	W132G	0.02	DELETERIOUS	T	T	T	T	T	T	T	T	T	T	T	T	T	T	T	T	T	T	T	G	T	*
Mfsd13b	7	120989109	T	G	missense_variant	rs32660292	S42A	0.031	DELETERIOUS	T	T	T	T	T	T	T	T	T	T	T	T	T	T	T	T	T	T	G	G	T	*
Mfsd13b	7	120991435	G	A	missense_variant	rs223295458	R133H	0.008	DELETERIOUS	G	G	G	G	G	G	G	G	G	G	G	G	G	G	G	G	G	G	G	G	G
Ms4a4c	19	11416396	C	A	missense_variant	rs217660669	S68Y	0.035	DELETERIOUS	C	C	C	C	C	C	C	C	C	C	C	C	C	C	C	C	C	C	C	C	C
Ms4a7	19	11324585	G	A	missense_variant	rs36543831	A106V	0	DELETERIOUS	G	N	N	N	N	N	G	N	N	N	G	G	N	G	G	N	N	N	N	G	G
Ms4a7	19	11324585	G	A	missense_variant	rs36543831	A15V	0	DELETERIOUS	G	N	N	N	N	N	G	N	N	N	G	G	N	G	G	N	N	N	N	G	G
Ms4a7	19	11324585	G	A	missense_variant	rs36543831	A158V	0.011	DELETERIOUS	G	N	N	N	N	N	G	N	N	N	G	G	N	G	G	N	N	N	N	G	G
Ms4a7	19	11324585	G	A	missense_variant	rs36543831	A125V	0.011	DELETERIOUS	G	N	N	N	N	N	G	N	N	N	G	G	N	G	G	N	N	N	N	G	G
Ms4a7	19	11324433	C	T	missense_variant	rs263306114	V66I	0	DELETERIOUS (WARNING LOW CONFIDENCE)	C	C	C	C	C	C	C	C	C	C	C	C	C	C	C	C	C	C	C	C	C
Ms4a7	19	11334319	A	T	missense_variant	rs263261607	I28N	0.023	DELETERIOUS (WARNING LOW CONFIDENCE)	A	A	A	A	A	A	A	A	A	A	A	A	A	A	A	A	A	A	A	A	A
Ms4a7	19	11334346	G	C	missense_variant	rs239677957	P19R	0	DELETERIOUS (WARNING LOW CONFIDENCE)	G	G	G	G	C	G	G	G	G	G	G	G	G	G	G	G	G	G	G	G	G
Ms4a7	19	11324591	A	G	missense_variant	rs238106921	V156A	0.008	DELETERIOUS	A	A	A	A	A	A	A	A	A	A	A	A	A	A	A	A	A	A	A	A	A
Ms4a7	19	11324591	A	G	missense_variant	rs238106921	V123A	0.009	DELETERIOUS	A	A	A	A	A	A	A	A	A	A	A	A	A	A	A	A	A	A	A	A	A
Ms4a7	19	11324591	A	G	missense_variant	rs238106921	V104A	0.028	DELETERIOUS	A	A	A	A	A	A	A	A	A	A	A	A	A	A	A	A	A	A	A	A	A
Ms4a7	19	11324591	A	G	missense_variant	rs238106921	V13A	0.031	DELETERIOUS	A	A	A	A	A	A	A	A	A	A	A	A	A	A	A	A	A	A	A	A	A
Ocln	13	100506157	C	G	missense_variant	rs247662747	E472D	0.014	DELETERIOUS	C	C	C	C	C	C	C	C	C	C	C	C	C	C	C	C	C	C	C	C	C
Olfr283	15	98379053	G	C	missense_variant	rs229238932	A19G	0.008	DELETERIOUS	G	G	G	G	G	G	G	G	G	G	G	G	G	G	G	G	G	G	G	G	G
Olfr284	15	98340565	A	G	synonymous_variant	rs266202293	G125G	0.01	DELETERIOUS	A	A	A	A	A	A	A	A	A	A	A	A	A	A	A	A	A	A	A	A	A
Otoa	7	121131323	A	G	missense_variant	rs32671631	H582R	0.033	DELETERIOUS	A	A	A	A	A	A	A	A	A	A	A	A	A	A	A	A	A	A	A	A	A
Otoa	7	121122004	T	C	missense_variant	rs32666960	I414T	0.004	DELETERIOUS	T	T	T	T	T	T	T	T	T	T	T	T	T	T	T	T	T	T	T	T	T
Otoa	7	121121910	C	T	missense_variant	rs32666957	L383F	0	DELETERIOUS	C	C	C	C	C	C	C	C	C	C	C	C	C	C	C	C	C	C	C	C	C
Otoa	7	121139832	T	G	missense_variant	rs247094203	F755V	0.032	DELETERIOUS	T	T	T	T	T	T	T	T	T	T	T	T	T	T	T	T	T	T	T	T	T
Otoa	7	121162885	C	T	missense_variant	rs246764562	A1123V	0.036	DELETERIOUS (WARNING LOW CONFIDENCE)	C	C	C	C	C	C	C	C	C	C	C	C	C	C	C	C	C	C	C	C	C
Otoa	7	121134030	G	A	missense_variant	rs231030237	A707T	0.007	DELETERIOUS	G	G	G	G	G	G	G	G	G	G	G	G	G	G	G	G	G	G	G	G	G
Otoa	7	121145545	A	C	missense_variant	rs224873823	E842A	0.042	DELETERIOUS	A	A	A	A	A	A	A	A	A	A	A	A	A	A	A	A	A	A	A	A	A
Pdzd9	7	120660351	T	G	missense_variant	rs32631707	K138T	0.01	DELETERIOUS	T	T	T	T	T	T	T	T	T	T	T	T	T	T	T	T	T	T	T	T	T
Pdzd9	7	120660165	A	T	missense_variant	rs32631705	I200N	0.001	DELETERIOUS	A	A	A	A	A	A	A	A	A	A	A	A	A	A	A	A	A	A	T	A	A
Pdzd9	7	120660066	G	A	missense_variant	rs265473953	S233L	0.01	DELETERIOUS	G	G	G	G	G	G	G	G	G	G	G	G	G	G	G	G	G	G	G	G	G
Pdzd9	7	120660139	C	T	missense_variant	rs230812983	D209N	0	DELETERIOUS	C	C	C	C	C	C	C	C	C	C	C	C	C	C	C	C	C	C	C	C	C
Polr3e	7	120933356	G	T	missense_variant	rs32113739	S205I	0.033	DELETERIOUS	G	G	G	G	G	G	G	G	G	G	G	G	G	G	G	G	G	G	G	G	T	*
Polr3e	7	120933356	G	T	missense_variant	rs32113739	S231I	0.042	DELETERIOUS	G	G	G	G	G	G	G	G	G	G	G	G	G	G	G	G	G	G	G	G	T	*
Prkcb	7	122568145	A	G	synonymous_variant	rs232571755	S359S	0.028	DELETERIOUS	A	A	A	A	A	A	A	A	A	A	A	A	A	A	A	A	A	A	A	G	A
Rcor1	12	111099928	T	A	missense_variant	rs36293910	D217E	0.028	DELETERIOUS	T	T	T	T	N	N	A	T	T	N	T	T	T	T	T	T	T	T	N	T	T
Rcor1	12	111099928	T	A	missense_variant	rs36293910	D119E	0.028	DELETERIOUS	T	T	T	T	N	N	A	T	T	N	T	T	T	T	T	T	T	T	N	T	T
Rpn1	6	88100872	C	T	missense_variant	rs232384807	T430M	0.021	DELETERIOUS	C	C	C	C	C	C	C	C	C	C	C	C	C	C	C	C	C	C	C	C	C
Scnn1g	7	121742311	T	G	missense_variant	rs49681092	I232S	0.002	DELETERIOUS	T	T	T	T	T	T	T	T	T	T	T	T	T	T	T	T	T	N	T	T	T
Scnn1g	7	121743685	G	C	missense_variant	rs48555654	G287A	0	DELETERIOUS	G	G	G	G	G	G	G	G	G	G	G	G	G	G	G	G	G	N	G	G	G
Sez6l2	7	126951105	C	T	missense_variant	rs257678294	A23V	0.027	DELETERIOUS (WARNING LOW CONFIDENCE)	C	C	C	C	C	C	C	C	C	C	C	C	C	C	C	C	C	C	C	C	C
Slc30a5	13	100803437	C	T	missense_variant	rs29726755	G714R	0.003	DELETERIOUS	C	C	C	C	C	C	C	C	C	C	C	C	C	C	C	C	C	C	T	C	T	*
Slc30a5	13	100814643	C	T	missense_variant	rs228885903	V244M	0.047	DELETERIOUS	C	C	C	C	C	C	C	C	C	C	C	C	C	C	C	C	C	C	C	C	C
Sp4	12	118299208	A	G	missense_variant	rs245076145	S368P	0.013	DELETERIOUS	A	A	A	A	A	A	A	A	A	A	A	A	A	A	A	A	A	A	A	A	A
Srl	16	4523020	C	T	missense_variant	rs46542177	A12T	0	DELETERIOUS (WARNING LOW CONFIDENCE)	C	C	C	C	C	C	C	C	C	C	C	C	C	C	C	C	T	C	C	C	C
Srl	16	4497157	G	A	missense_variant	rs220025566	S207F	0.049	DELETERIOUS	G	G	G	G	G	G	G	G	G	G	G	G	G	G	G	G	G	G	G	G	G
Stat5b	11	100797656	G	T	missense_variant	rs27058322	L327M	0.008	DELETERIOUS	G	G	G	G	G	G	G	G	G	G	G	G	G	G	G	G	G	G	G	G	G
Tmem109	19	10874406	G	A	missense_variant	rs36400452	L25F	0	DELETERIOUS (WARNING LOW CONFIDENCE)	G	G	G	G	G	G	G	G	G	G	G	G	G	G	G	G	G	G	G	G	G
Tmem109	19	10874406	G	A	missense_variant	rs36400452	L39F	0.005	DELETERIOUS	G	G	G	G	G	G	G	G	G	G	G	G	G	G	G	G	G	G	G	G	G
Ttc23l	15	10551506	C	A	missense_variant	rs221679037	D45Y	0.002	DELETERIOUS (WARNING LOW CONFIDENCE)	C	C	C	C	C	C	C	C	C	C	C	C	C	C	C	C	C	C	C	C	C
Uroc1	6	90346760	A	G	synonymous_variant	rs51550883	S362S	0.049	DELETERIOUS	A	A	A	A	A	A	A	A	A	A	A	G	A	A	A	A	A	A	A	G	A
Uroc1	6	90349142	A	T	missense_variant	rs52060890	Q459L	0.008	DELETERIOUS	A	A	A	A	A	A	A	A	A	A	A	T	A	A	A	A	A	A	A	T	A
Uroc1	6	90349142	A	T	missense_variant	rs52060890	Q493L	0.009	DELETERIOUS	A	A	A	A	A	A	A	A	A	A	A	T	A	A	A	A	A	A	A	T	A
Uroc1	6	90347912	G	A	missense_variant	rs46858114	G422R	0.004	DELETERIOUS	G	G	G	G	G	G	G	G	G	G	G	G	G	G	G	G	G	G	G	G	G
Uroc1	6	90347912	G	A	missense_variant	rs46858114	G456R	0.005	DELETERIOUS	G	G	G	G	G	G	G	G	G	G	G	G	G	G	G	G	G	G	G	G	G
Uroc1	6	90363242	C	T	missense_variant	rs265586306	P676S	0	DELETERIOUS (WARNING LOW CONFIDENCE)	C	C	C	C	C	C	C	C	C	C	C	C	C	C	C	C	C	C	C	C	C
Uroc1	6	90363242	C	T	missense_variant	rs265586306	P710S	0	DELETERIOUS (WARNING LOW CONFIDENCE)	C	C	C	C	C	C	C	C	C	C	C	C	C	C	C	C	C	C	C	C	C
Uroc1	6	90338656	G	A	missense_variant	rs244063825	R173Q	0.001	DELETERIOUS	G	G	G	G	G	G	G	G	G	G	G	G	G	G	G	G	G	G	G	G	G
Vasn	16	4648818	G	C	missense_variant	rs242519503	E210Q	0.04	DELETERIOUS	G	G	G	G	G	G	G	G	G	G	G	G	G	G	G	G	G	G	G	G	G
Vasn	16	4649940	G	A	missense_variant	rs221476487	A584T	0.037	DELETERIOUS	G	G	G	G	G	G	G	G	G	G	G	G	G	G	G	G	A	G	G	G	G
Vasn	16	4648459	C	A	missense_variant	rs220054420	T90N	0.042	DELETERIOUS	C	C	C	C	C	C	C	C	C	C	C	C	C	C	C	C	A	C	C	C	C
Vmn1r50	6	90107420	A	G	missense_variant	rs256432707	D49G	0.007	DELETERIOUS	A	A	A	A	A	A	A	A	A	A	A	A	A	A	A	A	A	A	A	A	A
Vmn1r50	6	90108105	T	G	missense_variant	rs244803535	I277M	0.045	DELETERIOUS	T	T	T	T	T	T	T	T	T	T	T	T	T	T	T	T	T	T	T	T	T
Vwa3a	7	120772223	C	A	missense_variant	rs32647945	L235M	0.012	DELETERIOUS	C	C	C	C	C	C	C	C	C	C	C	C	C	C	C	C	C	C	C	C	C
Vwa3a	7	120772993	G	A	missense_variant	rs257752095	R264Q	0.027	DELETERIOUS	G	G	G	G	G	G	G	G	G	G	G	G	G	G	G	G	G	G	G	G	G
Vwa3a	7	120778878	C	A	missense_variant	rs252589952	H464N	0.01	DELETERIOUS	C	C	C	C	C	C	C	C	C	C	C	C	C	C	C	C	C	C	C	C	C
Vwa3a	7	120792473	G	C	missense_variant	rs244516144	S794T	0.012	DELETERIOUS	G	G	G	G	G	G	G	G	G	G	G	G	G	G	G	G	G	G	G	G	G
Vwa3a	7	120794266	C	T	missense_variant	rs228580235	A862V	0.006	DELETERIOUS	C	C	C	C	C	C	C	C	C	C	C	C	C	C	C	C	C	C	C	C	C
Vwa3a	7	120792398	C	T	missense_variant	rs222148470	T87M	0	DELETERIOUS (WARNING LOW CONFIDENCE)	C	C	C	C	C	C	C	C	C	C	C	C	C	C	C	C	C	C	C	C	C
Vwa3a	7	120752585	C	T	missense_variant	rs221608149	T24I	0.019	DELETERIOUS (WARNING LOW CONFIDENCE)	C	C	C	C	C	C	C	C	C	C	C	C	C	C	C	C	C	C	C	C	C
Vwa3a	7	120776067	C	T	missense_variant	rs218337580	P368L	0.005	DELETERIOUS	C	C	C	C	C	C	C	C	C	C	C	C	C	C	C	C	C	C	C	C	C
Zfp839	12	110855516	G	A	missense_variant	rs33360819	A255T	0	DELETERIOUS	G	G	G	G	G	G	A	G	A	G	G	G	G	G	G	G	G	G	G	G	G
Zfp839	12	110868825	C	T	missense_variant	rs257338473	A838V	0	DELETERIOUS	C	C	C	C	C	C	C	C	C	C	C	C	C	C	C	C	C	C	C	C	C
Zfp839	12	110868795	A	G	missense_variant	rs240058511	H828R	0.044	DELETERIOUS	A	A	A	A	A	A	A	A	A	A	A	A	A	A	A	A	A	A	A	A	A
Zfp839	12	110850532	G	A	missense_variant	rs231303753	G72D	0.024	DELETERIOUS	G	G	G	G	G	G	G	G	G	G	G	G	G	G	G	G	G	G	G	G	G
Zkscan2	7	123495272	C	A	missense_variant	rs242092038	K226N	0.011	DELETERIOUS	C	C	C	C	C	C	C	C	C	C	C	C	C	C	C	C	C	C	C	A	C	*
Zp2	7	120132504	G	T	missense_variant	rs32606315	A676D	0.035	DELETERIOUS	G	T	T	T	G	T	T	G	G	G	G	G	G	T	G	G	G	G	T	G	T
Zp2	7	120143666	A	T	missense_variant	rs261996293	I81N	0.005	DELETERIOUS	A	A	A	A	A	A	A	A	A	A	A	A	A	A	A	A	A	A	A	A	A
Zp2	7	120145223	G	A	missense_variant	rs234394878	P13L	0.008	DELETERIOUS	G	G	G	G	G	G	G	G	G	G	G	G	G	G	G	G	G	G	G	G	G
Cped1	6	22088827	C	G		rs33707868	S296R	0.013	DELETERIOUS	C	C	C	C	C	C	C	C	C	C	C	C	C	C	C	C	C	C	C	C	C
Cped1	6	22122407	T	C		rs33705012	S429P	0.028	DELETERIOUS	T	T	T	T	T	T	T	T	T	C	T	T	T	T	T	T	T	T	T	T	T
Cped1	6	22143952	G	A		rs258341593	V566M	0.004	DELETERIOUS	G	G	G	G	G	G	G	G	G	G	G	G	G	G	G	G	G	G	G	G	G
Cped1	6	22123604	A	T		rs253941558	H452L	0.007	DELETERIOUS	A	A	A	A	A	A	A	A	A	A	A	A	A	A	A	A	A	A	A	A	A
Cped1	6	22122321	A	G		rs212309814	N400S	0.015	DELETERIOUS	A	A	A	A	A	A	A	A	A	G	A	A	A	A	A	A	A	A	A	A	A
Hirip3	7	126864803	G	A		rs387035714	R571Q	0	DELETERIOUS	G	G	G	G	G	G	G	G	G	G	G	G	G	G	G	G	G	G	G	G	G
Hirip3	7	126863276	A	C		rs33103386	T75P	0.036	DELETERIOUS	A	A	A	A	A	A	A	A	A	A	A	A	A	A	A	A	A	A	A	A	A
Hirip3	7	126863838	A	T		rs255080306	E322V	0.007	DELETERIOUS	A	A	A	A	A	A	A	A	A	A	A	A	A	A	A	A	A	A	A	A	A
Hirip3	7	126863349	G	C		rs248309209	G99A	0	DELETERIOUS (WARNING LOW CONFIDENCE)	G	G	G	G	G	G	G	G	G	G	G	G	G	G	G	G	G	G	G	G	G
Hirip3	7	126863208	C	T		rs217979957	P52L	0	DELETERIOUS	C	C	C	C	C	C	C	C	C	C	C	C	C	C	C	C	C	C	C	C	C
Hirip3	7	126862610	C	A		rs33102473	H26N	0.02	DELETERIOUS	C	C	C	C	C	C	C	C	C	C	C	C	C	C	C	C	C	C	C	C	C
Rbbp6	7	122998871	G	C		rs241310468	E802Q	0.048	DELETERIOUS	G	G	G	G	G	G	G	G	G	G	G	G	G	G	G	G	G	G	G	G	G
Tmem219	7	126888937	T	C		rs33109141	R237G	0	DELETERIOUS (WARNING LOW CONFIDENCE)	T	T	T	T	T	T	T	T	T	T	T	T	T	T	T	T	T	T	T	T	T
Tmem219	7	126888937	T	C		rs33109141	R269G	0	DELETERIOUS (WARNING LOW CONFIDENCE)	T	T	T	T	T	T	T	T	T	T	T	T	T	T	T	T	T	T	T	T	T
Tmem219	7	126888937	T	C		rs33109141	R262G	0	DELETERIOUS (WARNING LOW CONFIDENCE)	T	T	T	T	T	T	T	T	T	T	T	T	T	T	T	T	T	T	T	T	T
Mean specific activity (nmol.mg.hour)										0.007517	0.0077	0.008	0.0092	0.01003	0.01023	0.01027	0.01034	0.0108	0.01153	0.01306	0.01336	0.01368	0.01548	0.01773	0.0179	0.01793	0.02	0.0373	0.0377	0.0459

## Sheet: beta-D-galactosidase
Gene	Chr	Location (bp)	Ref_allele	Alt_allele	Functional Annotation	rsID	AA_change	SIFT_score	SIFT_prediction	PL/J	NZB/Bl NJ	BUB/Bn J	DBA/2J	AKR/J	NZW/Lac J	LP/J	129X1/Sv J	BTBR T<+> Itpr3<tf>/J	SEA/Gn J	SM/J	KK/Hl J	CBA/J	MA/My J	LG/J	RIIIS/J	CAST/Ei J	SWR/J	A/J	CE/J	BALB/c J	C57BL/6J	C58/J
Zfp326	5	105914893	G	A	missense_variant	rs264503997	E543K	0.011	DELETERIOUS	G	G	G	G	G	G	G	G	G	G	G	G	G	G	G	G	G	G	G	G	G	G	G
Arnt2	7	84304856	C	G	missense_variant	rs33261697	G273A	0.007	DELETERIOUS	C	C	C	C	C	C	C	N	C	C	C	C	C	C	C	C	C	C	C	C	C	C	C
Vmn2r66	7	85011849	A	T	missense_variant	rs36482145	Y58N	0.007	DELETERIOUS	A	A	A	N	A	A	A	N	A	A	T	A	A	A	A	A	A	A	A	A	A	A	A
Vmn2r66	7	85007780	A	G	missense_variant	rs32390969	I139T	0.019	DELETERIOUS	G	G	G	G	G	G	G	G	G	G	G	G	G	G	G	G	G	G	G	A	G	A	A
Vmn2r66	7	84995076	T	G	missense_variant	rs31350967	I709L	0.031	DELETERIOUS	T	T	T	T	T	T	T	G	T	T	T	T	T	T	T	T	T	T	T	T	T	T	T
Vmn2r66	7	85006874	T	C	missense_variant	rs31145000	I311M	0.015	DELETERIOUS	C	C	C	C	C	C	C	T	C	C	C	C	C	C	C	C	C	C	C	T	C	T	T
Vmn2r66	7	84995070	G	T	missense_variant	rs262180236	L711I	0.014	DELETERIOUS	G	G	G	G	G	G	G	G	G	G	G	G	G	G	G	G	G	G	G	G	G	G	G
Vmn2r66	7	85006614	G	A	missense_variant	rs257653954	A398V	0.001	DELETERIOUS	G	G	G	G	G	G	G	G	G	G	G	G	G	G	G	G	G	G	G	G	G	G	G
Vmn2r66	7	85011911	C	T	missense_variant	rs256481906	G37E	0.047	DELETERIOUS	C	C	C	C	C	C	C	C	C	C	C	C	C	C	C	C	C	C	C	C	C	C	C
Vmn2r66	7	85005697	T	A	missense_variant	rs246658349	K468I	0.015	DELETERIOUS	T	T	T	T	T	T	T	T	T	T	T	T	T	T	T	T	A	T	T	T	T	T	T
Vmn2r66	7	84994928	A	T	missense_variant	rs241860102	V758E	0.002	DELETERIOUS	A	A	A	A	A	A	A	A	A	A	A	A	A	A	A	A	A	A	A	A	A	A	A
Vmn2r66	7	84995406	T	C	missense_variant	rs228085119	I599V	0.015	DELETERIOUS	T	T	T	T	T	T	T	T	T	T	T	T	T	T	T	T	T	T	T	T	T	T	T
Vmn2r66	7	84995364	C	A	missense_variant	rs227845980	A613S	0	DELETERIOUS	C	C	C	C	C	C	C	C	C	C	C	C	C	C	C	C	C	C	C	C	C	C	C
Vmn2r66	7	84995386	G	C	missense_variant	rs219591715	H605Q	0.041	DELETERIOUS	G	G	G	G	G	G	G	G	G	G	G	G	G	G	G	G	G	G	G	G	G	G	G
Vmn2r67	7	85137112	C	G	missense_variant	rs37216391	D562H	0.011	DELETERIOUS	C	C	C	C	C	C	C	C	C	C	C	C	C	C	C	C	C	C	C	C	C	C	C
Vmn2r67	7	85149904	C	T	missense_variant	rs259104896	V532M	0.033	DELETERIOUS	C	C	C	C	C	C	C	C	C	C	C	C	C	C	C	C	G	C	C	C	C	C	C
Vmn2r67	7	85150572	T	G	missense_variant	rs243712148	H486P	0.047	DELETERIOUS	T	T	T	T	T	T	T	T	T	T	T	T	T	T	T	T	C	T	T	T	T	T	T
Vmn2r67	7	85149942	C	T	missense_variant	rs218646839	R519K	0.046	DELETERIOUS	C	C	C	C	C	C	C	C	C	C	C	C	C	C	C	C	C	C	C	C	C	C	C
Vmn2r67	7	85137019	C	A	missense_variant	rs216313741	V593F	0.02	DELETERIOUS	C	C	C	C	C	C	C	C	C	C	C	C	C	C	C	C	C	C	C	C	C	C	C
Vmn2r68	7	85237533	A	T	missense_variant	rs37088585	Y58N	0.008	DELETERIOUS	A	T	A	T	A	T	T	A	A	A	A	A	T	A	A	A	A	A	A	A	A	A	A
Vmn2r68	7	85234631	T	A	missense_variant	rs236443334	I89F	0.027	DELETERIOUS	T	T	T	T	T	T	T	T	T	T	T	T	T	T	T	T	A	T	T	T	T	T	T
Vmn2r68	7	85221577	C	G	missense_variant	rs225733492	D833H	0.018	DELETERIOUS	C	C	C	C	C	C	C	C	C	C	C	C	C	C	C	C	G	C	C	C	C	C	C
Vmn2r68	7	85221729	A	G	missense_variant	rs218238784	F782S	0	DELETERIOUS	A	A	A	A	A	A	A	A	A	A	A	A	A	A	A	A	A	A	A	A	A	A	A
Vmn2r68	7	85234622	A	T	missense_variant	rs217423336	L92I	0	DELETERIOUS	A	A	A	A	A	A	A	A	A	A	A	A	A	A	A	A	A	A	A	A	A	A	A
Vmn2r68	7	85232415	G	A	missense_variant	rs213397443	R486C	0.002	DELETERIOUS	G	G	G	G	G	G	G	G	G	G	G	G	G	G	G	G	G	G	G	G	G	G	G
Vmn2r69	7	85406547	G	C	missense_variant	rs6228740	H794Q	0.029	DELETERIOUS	G	G	G	G	G	G	G	G	G	G	C	G	G	G	G	G	G	G	G	G	G	G	G
Vmn2r69	7	85406906	T	G	missense_variant	rs48939730	K675Q	0.011	DELETERIOUS	T	T	T	T	T	T	T	N	T	T	N	T	T	T	T	T	T	T	T	T	N	T	T
Vmn2r69	7	85411201	A	T	missense_variant	rs48811502	S392T	0.002	DELETERIOUS	A	A	A	A	A	A	A	A	A	A	A	A	A	A	A	A	T	A	A	A	A	A	A
Vmn2r69	7	85411831	A	G	missense_variant	rs253564441	S182P	0.002	DELETERIOUS	A	A	A	A	A	A	A	A	A	A	A	A	A	A	A	A	A	A	A	A	A	A	A
Vmn2r69	7	85406516	C	T	missense_variant	rs228793785	E805K	0.001	DELETERIOUS	C	C	C	C	C	C	C	C	C	C	C	C	C	C	C	C	C	C	C	C	C	C	C
Vmn2r70	7	85566058	G	A	synonymous_variant	rs215055577	F89F	0.028	DELETERIOUS	G	G	G	G	G	G	G	A	G	G	G	G	G	G	G	G	G	G	G	G	G	G	G
Vmn2r70	7	85559281	T	A	missense_variant	rs50744561	T663S	0.002	DELETERIOUS	T	A	T	A	T	A	A	T	A	A	T	T	A	T	T	T	A	T	T	T	T	T	T
Vmn2r70	7	85566029	A	G	missense_variant	rs49338249	V99A	0.031	DELETERIOUS	A	G	A	G	A	G	G	A	G	G	A	A	G	A	A	A	G	A	A	A	A	A	A
Vmn2r70	7	85558849	C	A	missense_variant	rs48850265	V807L	0.034	DELETERIOUS	C	A	C	A	C	A	A	C	A	A	C	C	A	C	C	C	C	C	C	C	C	C	C
Vmn2r70	7	85559542	T	C	missense_variant	rs47796699	I576V	0.018	DELETERIOUS	T	C	T	C	T	C	C	T	C	C	T	T	C	T	T	T	C	T	T	T	T	T	T
Vmn2r70	7	85559332	C	T	missense_variant	rs46741710	V646I	0.035	DELETERIOUS	C	T	C	T	C	T	T	C	T	T	C	C	T	C	C	C	C	C	C	C	C	C	C
Vmn2r70	7	85565387	T	G	missense_variant	rs37091376	K186Q	0.009	DELETERIOUS	G	G	T	G	G	G	G	N	G	G	T	G	G	G	T	G	G	G	G	G	G	T	G
Vmn2r70	7	85561881	C	T	missense_variant	rs258614923	E541K	0.003	DELETERIOUS	C	C	C	C	C	C	C	C	C	C	T	C	C	C	C	C	C	C	C	C	C	C	C
Vmn2r71	7	85620760	T	C	missense_variant	rs212521771	L493P	0.001	DELETERIOUS	T	T	T	T	T	T	T	C	T	T	T	T	T	T	T	T	T	T	T	T	T	T	T
Vmn2r74	7	85958247	G	A	synonymous_variant	rs46624866	C89C	0.029	DELETERIOUS	G	G	G	G	G	G	G	A	G	G	A	G	G	G	G	G	G	G	G	G	G	G	G
Vmn2r74	7	85956913	C	T	synonymous_variant	rs237835580	G408G	0.013	DELETERIOUS	C	C	C	C	C	C	C	C	C	C	T	C	C	C	C	C	C	C	C	C	C	C	C
Vmn2r74	7	85952425	A	G	synonymous_variant	rs213616788	S668S	0.021	DELETERIOUS	A	A	A	A	A	A	A	A	A	A	A	A	A	A	A	A	A	A	A	A	A	A	A
Vmn2r74	7	85952326	T	C	missense_variant	rs227620428	I701M	0.011	DELETERIOUS	T	T	T	T	T	T	T	T	T	T	T	T	T	T	T	T	T	T	T	T	T	T	T
Vmn2r74	7	85955641	G	A	missense_variant	rs215036913	P519S	0.028	DELETERIOUS	G	G	G	G	G	G	G	G	G	G	G	G	G	G	G	G	G	G	G	G	G	G	G
Olfr310	7	86269785	C	T	0	rs31433956	M1I	0.019	DELETERIOUS	C	T	C	T	C	T	T	T	T	T	T	C	T	C	C	C	C	C	C	C	C	C	C
Olfr310	7	86269257	A	C	missense_variant	rs38043716	C177W	0.001	DELETERIOUS	A	A	A	A	A	A	A	N	A	A	A	A	A	A	A	A	C	A	A	A	A	A	A
Olfr310	7	86269616	A	T	missense_variant	rs31823802	Y58N	0	DELETERIOUS	A	A	A	A	A	A	A	T	A	A	A	A	A	A	A	A	A	A	A	A	A	A	A
Olfr310	7	86269537	A	C	missense_variant	rs246565016	L84R	0	DELETERIOUS	A	C	A	C	A	C	C	A	C	C	C	A	C	A	A	A	A	A	A	A	A	A	A
Olfr310	7	86269430	G	A	missense_variant	rs230882673	R120C	0.046	DELETERIOUS	G	G	G	G	G	G	G	G	G	G	G	G	G	G	G	G	G	G	G	G	G	G	G
Olfr310	7	86269092	T	G	missense_variant	rs224070938	R232S	0.003	DELETERIOUS	T	T	T	T	T	T	T	T	T	T	T	T	T	T	T	T	T	T	T	T	T	T	T
Vmn2r77	7	86801736	C	G	missense_variant	rs260497530	L277V	0.042	DELETERIOUS	C	C	C	C	C	C	C	C	C	C	C	C	C	C	C	C	G	C	C	C	C	C	C
Vmn2r77	7	86803703	G	C	missense_variant	rs240823628	E543Q	0.003	DELETERIOUS	G	G	G	G	G	G	G	G	G	G	G	G	G	G	G	G	C	G	G	G	G	G	G
Vmn2r77	7	86811346	A	G	missense_variant	rs238002899	T627A	0.021	DELETERIOUS	A	A	A	A	A	A	A	A	A	A	A	A	A	A	A	A	G	A	A	A	A	A	A
Vmn2r77	7	86811259	A	G	missense_variant	rs214774202	T598A	0.002	DELETERIOUS	A	A	A	A	A	A	A	A	A	A	A	A	A	A	A	A	A	A	A	A	A	A	A
Vmn2r78	7	86954755	T	A	missense_variant	rs218280087	S714T	0.005	DELETERIOUS	T	T	T	T	T	T	T	T	T	T	T	T	T	T	T	T	T	T	T	T	T	T	T
Vmn2r79	7	87037321	A	T	missense_variant	rs260418554	I637F	0.001	DELETERIOUS	A	A	A	A	A	A	A	A	A	A	A	A	A	A	A	A	A	A	A	A	A	A	A
Fam181b	7	93079992	G	A	5_prime_UTR_exon_variant	rs243551529	R182W	0	DELETERIOUS (WARNING LOW CONFIDENCE)	G	G	G	G	G	G	G	G	G	G	G	G	G	G	G	G	G	G	G	G	G	G	G
Fam181b	7	93080156	A	T	missense_variant	rs31093296	V127D	0	DELETERIOUS (WARNING LOW CONFIDENCE)	T	T	T	T	T	T	T	T	T	T	T	T	T	T	T	T	T	T	T	A	T	A	A
Fam181b	7	93080375	A	G	missense_variant	rs246714463	L54P	0	DELETERIOUS (WARNING LOW CONFIDENCE)	A	A	A	A	A	A	A	A	A	A	A	A	A	A	A	A	A	A	A	A	A	A	A
Tenm4	7	96888858	G	A	synonymous_variant	rs242504441	Q1871Q	0.04	DELETERIOUS	G	G	G	G	G	G	G	G	G	G	G	G	G	G	G	G	G	G	G	G	G	G	G
Tenm4	7	96888858	G	A	synonymous_variant	rs242504441	Q1842Q	0.04	DELETERIOUS	G	G	G	G	G	G	G	G	G	G	G	G	G	G	G	G	G	G	G	G	G	G	G
Tenm4	7	96888858	G	A	synonymous_variant	rs242504441	Q1879Q	0.041	DELETERIOUS	G	G	G	G	G	G	G	G	G	G	G	G	G	G	G	G	G	G	G	G	G	G	G
Tenm4	7	96906392	C	T	missense_variant	rs31586495	A2731V	0.012	DELETERIOUS	C	C	C	T	C	C	C	C	C	T	C	C	T	C	C	C	C	C	C	C	C	C	C
Tenm4	7	96906392	C	T	missense_variant	rs31586495	A2760V	0.013	DELETERIOUS	C	C	C	T	C	C	C	C	C	T	C	C	T	C	C	C	C	C	C	C	C	C	C
Tenm4	7	96906392	C	T	missense_variant	rs31586495	A2768V	0.013	DELETERIOUS	C	C	C	T	C	C	C	C	C	T	C	C	T	C	C	C	C	C	C	C	C	C	C
Tenm4	7	96868014	T	G	missense_variant	rs31584361	D1429E	0.003	DELETERIOUS	T	T	T	G	T	T	T	T	T	T	T	T	T	T	T	T	T	T	T	T	T	T	T
Tenm4	7	96868014	T	G	missense_variant	rs31584361	D1437E	0.003	DELETERIOUS	T	T	T	G	T	T	T	T	T	T	T	T	T	T	T	T	T	T	T	T	T	T	T
Tenm4	7	96868014	T	G	missense_variant	rs31584361	D1400E	0.003	DELETERIOUS	T	T	T	G	T	T	T	T	T	T	T	T	T	T	T	T	T	T	T	T	T	T	T
Tenm4	7	96905972	C	A	missense_variant	rs242311390	S2620Y	0.005	DELETERIOUS	C	C	C	C	C	C	C	C	C	C	C	C	C	C	C	C	C	C	C	C	C	C	C
Tenm4	7	96905972	C	A	missense_variant	rs242311390	S2628Y	0.005	DELETERIOUS	C	C	C	C	C	C	C	C	C	C	C	C	C	C	C	C	C	C	C	C	C	C	C
Tenm4	7	96905972	C	A	missense_variant	rs242311390	S2591Y	0.005	DELETERIOUS	C	C	C	C	C	C	C	C	C	C	C	C	C	C	C	C	C	C	C	C	C	C	C
Tenm4	7	96894740	G	A	missense_variant	rs229101743	V2025I	0.047	DELETERIOUS	G	G	G	G	G	G	G	G	G	G	G	G	G	G	G	G	G	G	G	G	G	G	G
Tenm4	7	96894740	G	A	missense_variant	rs229101743	V2017I	0.048	DELETERIOUS	G	G	G	G	G	G	G	G	G	G	G	G	G	G	G	G	G	G	G	G	G	G	G
Tenm4	7	96894740	G	A	missense_variant	rs229101743	V1988I	0.048	DELETERIOUS	G	G	G	G	G	G	G	G	G	G	G	G	G	G	G	G	G	G	G	G	G	G	G
Fez1	9	36843972	A	T	missense_variant	rs29842108	N89I	0.011	DELETERIOUS	A	A	A	A	A	A	A	T	A	A	T	A	A	T	A	A	A	T	T	A	T	A	A
4931429L15Rik	9	46305842	C	T	missense_variant	rs263879150	V212M	0.043	DELETERIOUS (WARNING LOW CONFIDENCE)	C	C	C	C	C	C	C	C	C	C	C	C	C	C	C	C	C	C	C	C	C	C	C
Peak1	9	56207361	G	T	missense_variant	rs47965633	S1432C	0.031	DELETERIOUS	G	G	G	G	G	G	G	G	G	G	G	G	G	G	G	G	C	G	G	G	G	G	G
Peak1	9	56206596	T	C	missense_variant	rs212317545	K1687R	0.033	DELETERIOUS	T	T	T	T	T	T	T	T	T	T	T	T	T	T	T	T	T	T	T	T	T	T	T
Iqch	9	63508316	T	C	missense_variant	rs233865949	Y558C	0.019	DELETERIOUS	T	T	T	T	T	T	T	T	T	T	T	T	T	T	T	T	T	T	T	T	T	T	T
Iqch	9	63508316	T	C	missense_variant	rs233865949	Y519C	0.022	DELETERIOUS	T	T	T	T	T	T	T	T	T	T	T	T	T	T	T	T	T	T	T	T	T	T	T
Pdcd6ip	9	113662442	G	T	missense_variant	rs46037244	L573M	0.021	DELETERIOUS	G	G	G	G	G	G	G	G	G	G	G	G	G	G	G	G	T	G	G	G	G	G	G
Pdcd6ip	9	113662442	G	T	missense_variant	rs46037244	L578M	0.021	DELETERIOUS	G	G	G	G	G	G	G	G	G	G	G	G	G	G	G	G	T	G	G	G	G	G	G
Susd5	9	114057569	G	A	missense_variant	rs249666649	A9T	0.039	DELETERIOUS	G	G	G	G	G	G	G	G	G	G	G	G	G	G	G	G	G	G	G	G	G	G	G
Susd5	9	114096549	C	T	missense_variant	rs227472857	T500M	0.047	DELETERIOUS	C	C	C	C	C	C	C	C	C	C	C	C	C	C	C	C	T	C	C	C	C	C	C
Smurf2	11	106828598	C	T	missense_variant	rs219863736	R592Q	0.01	DELETERIOUS	C	C	C	C	C	C	C	C	C	C	T	C	C	C	C	C	C	C	C	C	C	C	C
Smurf2	11	106828598	C	T	missense_variant	rs219863736	R579Q	0.01	DELETERIOUS	C	C	C	C	C	C	C	C	C	C	T	C	C	C	C	C	C	C	C	C	C	C	C
Bptf	11	107054989	G	A	missense_variant	rs27024562	R2412C	0.046	DELETERIOUS	A	G	G	A	A	G	A	A	A	A	G	A	G	A	A	G	G	G	A	G	A	G	G
Bptf	11	107131485	C	G	missense_variant	rs257660050	E146D	0.045	DELETERIOUS	C	C	C	C	C	C	C	C	C	C	C	C	C	C	C	C	G	C	C	C	C	C	C
Bptf	11	107047246	G	A	missense_variant	rs253976413	A2673V	0.004	DELETERIOUS	G	G	G	G	G	G	G	G	G	G	G	G	G	G	G	G	G	G	G	G	G	G	G
Bptf	11	107047246	G	A	missense_variant	rs253976413	A2725V	0.004	DELETERIOUS	G	G	G	G	G	G	G	G	G	G	G	G	G	G	G	G	G	G	G	G	G	G	G
Bptf	11	107047246	G	A	missense_variant	rs253976413	A2788V	0.004	DELETERIOUS	G	G	G	G	G	G	G	G	G	G	G	G	G	G	G	G	G	G	G	G	G	G	G
Bptf	11	107047246	G	A	missense_variant	rs253976413	A67V	0.008	DELETERIOUS	G	G	G	G	G	G	G	G	G	G	G	G	G	G	G	G	G	G	G	G	G	G	G
Bptf	11	107095865	G	A	missense_variant	rs244916498	P586L	0.005	DELETERIOUS	G	G	G	G	G	G	G	G	G	G	G	G	G	G	G	G	G	G	G	G	G	G	G
Bptf	11	107074247	C	T	missense_variant	rs236317501	V1374M	0.022	DELETERIOUS	C	C	C	C	C	C	C	C	C	C	C	C	C	C	C	C	C	C	C	C	C	C	C
Bptf	11	107074247	C	T	missense_variant	rs236317501	V1259M	0.039	DELETERIOUS	C	C	C	C	C	C	C	C	C	C	C	C	C	C	C	C	C	C	C	C	C	C	C
Bptf	11	107074247	C	T	missense_variant	rs236317501	V1311M	0.039	DELETERIOUS	C	C	C	C	C	C	C	C	C	C	C	C	C	C	C	C	C	C	C	C	C	C	C
Bptf	11	107074243	G	C	missense_variant	rs221819689	S1260C	0.035	DELETERIOUS	G	G	G	G	G	G	G	G	G	G	G	G	G	G	G	G	C	G	G	G	G	G	G
Bptf	11	107074243	G	C	missense_variant	rs221819689	S1312C	0.036	DELETERIOUS	G	G	G	G	G	G	G	G	G	G	G	G	G	G	G	G	C	G	G	G	G	G	G
Bptf	11	107074243	G	C	missense_variant	rs221819689	S1375C	0.038	DELETERIOUS	G	G	G	G	G	G	G	G	G	G	G	G	G	G	G	G	C	G	G	G	G	G	G
Bptf	11	107047244	G	C	missense_variant	rs213516015	P68A	0.012	DELETERIOUS	G	G	G	G	G	G	G	G	G	G	G	G	G	G	G	G	G	G	G	G	G	G	G
Plk2	13	110397529	G	T	missense_variant	rs222641679	G255C	0.006	DELETERIOUS	G	G	G	G	G	G	G	G	G	G	G	G	G	G	G	G	G	G	G	G	G	G	G
Oxr1	15	41819897	T	G	missense_variant	rs50179186	S301A	0.014	DELETERIOUS	G	G	G	G	G	G	G	G	G	T	G	G	G	G	G	G	G	G	G	G	T	T	T
Oxr1	15	41819897	T	G	missense_variant	rs50179186	S308A	0.016	DELETERIOUS	G	G	G	G	G	G	G	G	G	T	G	G	G	G	G	G	G	G	G	G	T	T	T
Oxr1	15	41819897	T	G	missense_variant	rs50179186	S220A	0.019	DELETERIOUS	G	G	G	G	G	G	G	G	G	T	G	G	G	G	G	G	G	G	G	G	T	T	T
Oxr1	15	41813608	C	T	missense_variant	rs228947861	P187L	0.008	DELETERIOUS	C	C	C	C	C	C	C	C	C	C	C	C	C	C	C	C	C	C	C	C	C	C	C
Oxr1	15	41813608	C	T	missense_variant	rs228947861	P180L	0.009	DELETERIOUS	C	C	C	C	C	C	C	C	C	C	C	C	C	C	C	C	C	C	C	C	C	C	C
Oxr1	15	41813608	C	T	missense_variant	rs228947861	P99L	0.01	DELETERIOUS	C	C	C	C	C	C	C	C	C	C	C	C	C	C	C	C	C	C	C	C	C	C	C
Arhgap28	17	67901408	C	A	missense_variant	rs224248434	D22Y	0.005	DELETERIOUS	C	C	C	C	C	C	C	C	C	C	C	C	C	C	C	C	C	C	C	C	C	C	C
Arhgap28	17	67901408	C	A	missense_variant	rs224248434	D72Y	0.006	DELETERIOUS	C	C	C	C	C	C	C	C	C	C	C	C	C	C	C	C	C	C	C	C	C	C	C
Mean specific activity (nmol.mg.hour)										37	37.6	40	44.25	46.2	48.4	48.33	49.8	50.2	53.4	54.6	55.33	58	58.67	59.75	69.33	69.67	74.8	92.8	129.2	136.6	147.4	175

## Sheet: Lac
Gene	Chr	Location (bp)	Ref_allele	Alt_allele	Functional Annotation	rsID	AA_change	SIFT_score	SIFT_prediction	CBA/J	SWR/J	C58/J	NZB/Bl NJ	AKR/J	NZW/Lac J	SEA/Gn J	SM/J	RIIIS/J	PL/J	KK/Hl J	LG/J	LP/J	DBA/2J	BTBR T<+> Itpr3<tf>/J	129X1/Sv J	MA/My J	BALB/c J	CE/J	C57BL/6J	A/J
1500011B03Rik	5	114809292	A	G	missense_variant	rs233508581	V58A	0	DELETERIOUS (WARNING LOW CONFIDENCE)	A	A	A	A	A	A	A	A	A	A	A	A	A	A	A	A	A	A	A	A	A
1500011B03Rik	5	114809260	T	C	missense_variant	rs32137205	I69V	0	DELETERIOUS (WARNING LOW CONFIDENCE)	T	T	T	T	T	T	T	T	T	T	T	T	T	T	T	T	T	T	T	T	C
Adam6a	12	113546269	A	G	missense_variant	rs29180320	K754R	0	DELETERIOUS (WARNING LOW CONFIDENCE)	A	A	G	A	A	A	G	A	G	A	G	A	A	A	A	G	G	G	A	A	A
Adgrv1	13	81444864	C	T	missense_variant	rs13481906	E4276K	0	DELETERIOUS	C	C	C	C	C	C	T	C	C	C	C	C	C	C	C	C	C	T	C	C	T
Adgrv1	13	81579432	T	C	missense_variant	rs212555002	K363R	0	DELETERIOUS (WARNING LOW CONFIDENCE)	T	T	T	T	T	T	T	T	T	T	T	T	T	T	T	T	T	T	T	T	T
Adgrv1	13	81578899	G	A	missense_variant	rs212696324	P445S	0.046	DELETERIOUS	G	G	G	G	G	G	G	G	G	G	G	G	G	G	G	G	G	G	G	G	G
Adgrv1	13	81573342	C	G	missense_variant	rs215998534	D706H	0.037	DELETERIOUS	C	C	C	C	C	C	C	C	C	C	C	C	C	C	C	C	C	C	C	C	C
Adgrv1	13	81445279	C	G	missense_variant	rs216856138	E4196D	0	DELETERIOUS	C	C	C	C	C	C	C	C	C	C	C	C	C	C	C	C	C	C	C	C	C
Adgrv1	13	81557162	G	C	missense_variant	rs216907550	L1510V	0	DELETERIOUS	G	G	G	G	G	G	G	G	G	G	G	G	G	G	G	G	G	G	G	G	G
Adgrv1	13	81557162	G	C	missense_variant	rs216907550	L790V	0	DELETERIOUS	G	G	G	G	G	G	G	G	G	G	G	G	G	G	G	G	G	G	G	G	G
Adgrv1	13	81521036	C	A	missense_variant	rs217134007	S2467I	0.027	DELETERIOUS	C	C	C	C	C	C	C	C	C	C	C	C	C	C	C	C	C	C	C	C	C
Adgrv1	13	81521036	C	A	missense_variant	rs217134007	S1747I	0.011	DELETERIOUS	C	C	C	C	C	C	C	C	C	C	C	C	C	C	C	C	C	C	C	C	C
Adgrv1	13	81466335	C	T	missense_variant	rs219039086	A3980T	0.021	DELETERIOUS	C	C	C	C	C	C	C	C	C	C	C	C	C	C	C	C	C	C	C	C	C
Adgrv1	13	81574975	T	C	missense_variant	rs219205638	D668G	0.016	DELETERIOUS	T	T	T	T	T	T	T	T	T	T	T	T	T	T	T	T	T	T	T	T	T
Adgrv1	13	81524643	C	T	missense_variant	rs219609780	E2204K	0.021	DELETERIOUS	C	C	C	C	C	C	C	C	C	C	C	C	C	C	C	C	C	C	C	C	C
Adgrv1	13	81528878	C	T	missense_variant	rs221471927	V1945M	0.004	DELETERIOUS	C	C	C	C	C	C	C	C	C	C	C	C	C	C	C	C	C	C	C	C	C
Adgrv1	13	81528878	C	T	missense_variant	rs221471927	V1225M	0.021	DELETERIOUS	C	C	C	C	C	C	C	C	C	C	C	C	C	C	C	C	C	C	C	C	C
Adgrv1	13	81476525	C	T	missense_variant	rs222032288	R3775H	0.007	DELETERIOUS	C	C	C	C	C	C	C	C	C	C	C	C	C	C	C	C	C	C	C	C	C
Adgrv1	13	81595257	C	T	missense_variant	rs222487022	V42I	0	DELETERIOUS	C	C	C	C	C	C	C	C	C	C	C	C	C	C	C	C	C	C	C	C	C
Adgrv1	13	81559117	A	G	missense_variant	rs223242246	V1390A	0.004	DELETERIOUS	A	A	A	A	A	A	A	A	A	A	A	A	A	A	A	A	A	A	A	A	A
Adgrv1	13	81559117	A	G	missense_variant	rs223242246	V670A	0.008	DELETERIOUS	A	A	A	A	A	A	A	A	A	A	A	A	A	A	A	A	A	A	A	A	A
Adgrv1	13	81433667	C	T	missense_variant	rs225403884	D4753N	0.007	DELETERIOUS	C	C	C	C	C	C	C	C	C	C	C	C	C	C	C	C	C	C	C	C	C
Adgrv1	13	81543489	T	C	missense_variant	rs228607673	T1660A	0.049	DELETERIOUS	T	T	T	T	T	T	T	T	T	T	T	T	T	T	T	T	T	T	T	T	T
Adgrv1	13	81543489	T	C	missense_variant	rs228607673	T940A	0.037	DELETERIOUS	T	T	T	T	T	T	T	T	T	T	T	T	T	T	T	T	T	T	T	T	T
Adgrv1	13	81567427	T	C	missense_variant	rs230843106	I161V	0	DELETERIOUS (WARNING LOW CONFIDENCE)	T	T	T	T	T	T	T	T	T	T	T	T	T	T	T	T	T	T	T	T	T
Adgrv1	13	81567427	T	C	missense_variant	rs230843106	I881V	0	DELETERIOUS (WARNING LOW CONFIDENCE)	T	T	T	T	T	T	T	T	T	T	T	T	T	T	T	T	T	T	T	T	T
Adgrv1	13	81413150	T	C	missense_variant	rs232359156	K5415R	0.027	DELETERIOUS	T	T	T	T	T	C	T	T	T	C	T	T	T	T	T	T	T	T	T	T	T
Adgrv1	13	81439439	T	A	missense_variant	rs236348824	T4538S	0.045	DELETERIOUS	T	T	T	T	T	T	T	T	T	T	T	T	T	T	T	T	T	T	T	T	T
Adgrv1	13	81518052	G	A	missense_variant	rs239719763	P2682S	0	DELETERIOUS	G	G	G	G	G	G	G	G	G	G	G	G	G	G	G	G	G	G	G	G	G
Adgrv1	13	81518052	G	T	missense_variant	rs239719763	P2682T	0	DELETERIOUS	G	G	G	G	G	G	G	G	G	G	G	G	G	G	G	G	G	G	G	G	G
Adgrv1	13	81518052	G	A	missense_variant	rs239719763	P1962S	0	DELETERIOUS	G	G	G	G	G	G	G	G	G	G	G	G	G	G	G	G	G	G	G	G	G
Adgrv1	13	81518052	G	T	missense_variant	rs239719763	P1962T	0	DELETERIOUS	G	G	G	G	G	G	G	G	G	G	G	G	G	G	G	G	G	G	G	G	G
Adgrv1	13	81540125	G	A	missense_variant	rs240657072	P1712L	0.009	DELETERIOUS	G	G	G	G	G	G	G	G	G	G	G	G	G	G	G	G	G	G	G	G	G
Adgrv1	13	81540125	G	A	missense_variant	rs240657072	P992L	0.029	DELETERIOUS	G	G	G	G	G	G	G	G	G	G	G	G	G	G	G	G	G	G	G	G	G
Adgrv1	13	81520559	G	A	missense_variant	rs241540781	T2626M	0.005	DELETERIOUS	G	G	G	G	G	G	G	G	G	G	G	G	G	G	G	G	G	G	G	G	G
Adgrv1	13	81520559	G	A	missense_variant	rs241540781	T1906M	0.005	DELETERIOUS	G	G	G	G	G	G	G	G	G	G	G	G	G	G	G	G	G	G	G	G	G
Adgrv1	13	81578853	G	T	missense_variant	rs242686257	A460E	0.024	DELETERIOUS	G	G	G	G	G	G	G	G	G	G	G	G	G	G	G	G	G	G	G	G	G
Adgrv1	13	81419364	A	G	missense_variant	rs244341035	L5230P	0.043	DELETERIOUS	A	A	A	A	A	A	A	A	A	A	A	A	A	A	A	A	A	A	A	A	A
Adgrv1	13	81528746	C	T	missense_variant	rs245745321	A1989T	0.016	DELETERIOUS	C	C	C	C	C	C	C	C	C	C	C	C	C	C	C	C	C	C	C	C	C
Adgrv1	13	81419737	G	A	missense_variant	rs247442994	R5106C	0.005	DELETERIOUS	G	G	G	G	G	G	G	G	G	G	G	G	G	G	G	G	G	G	G	G	G
Adgrv1	13	81466326	G	A	missense_variant	rs248394024	L3983F	0.012	DELETERIOUS	G	G	G	G	G	G	G	G	G	G	G	G	G	G	G	G	G	G	G	G	G
Adgrv1	13	81472527	G	A	missense_variant	rs249378448	L3934F	0	DELETERIOUS	G	G	G	G	G	G	G	G	G	G	G	G	G	G	G	G	G	G	G	G	G
Adgrv1	13	81493180	C	T	missense_variant	rs250184280	G3277S	0.039	DELETERIOUS	C	C	C	C	C	C	C	C	C	C	C	C	C	C	C	C	C	C	C	C	C
Adgrv1	13	81523552	A	G	missense_variant	rs250251485	V2308A	0.004	DELETERIOUS	A	A	A	A	A	A	A	A	A	A	A	A	A	A	A	A	A	A	A	A	A
Adgrv1	13	81523552	A	G	missense_variant	rs250251485	V1588A	0.008	DELETERIOUS	A	A	A	A	A	A	A	A	A	A	A	A	A	A	A	A	A	A	A	A	A
Adgrv1	13	81531614	C	T	missense_variant	rs251399881	V1869I	0	DELETERIOUS	C	C	C	C	C	C	C	C	C	C	C	C	C	C	C	C	C	C	C	C	C
Adgrv1	13	81531614	C	T	missense_variant	rs251399881	V1149I	0	DELETERIOUS	C	C	C	C	C	C	C	C	C	C	C	C	C	C	C	C	C	C	C	C	C
Adgrv1	13	81559133	T	C	missense_variant	rs256589994	T1385A	0	DELETERIOUS	T	T	T	T	T	T	T	T	T	T	T	T	T	T	T	T	T	T	T	T	T
Adgrv1	13	81559133	T	C	missense_variant	rs256589994	T665A	0	DELETERIOUS	T	T	T	T	T	T	T	T	T	T	T	T	T	T	T	T	T	T	T	T	T
Adgrv1	13	81561521	G	C	missense_variant	rs256894024	P398A	0.042	DELETERIOUS (WARNING LOW CONFIDENCE)	G	G	G	G	G	G	G	G	G	G	G	G	G	G	G	G	G	G	G	G	G
Adgrv1	13	81391757	C	T	missense_variant	rs257408521	R5681Q	0.009	DELETERIOUS	C	C	C	C	C	C	C	C	C	C	C	C	C	C	C	C	C	C	C	C	C
Adgrv1	13	81524667	T	C	missense_variant	rs257696739	T2196A	0.013	DELETERIOUS	T	C	T	T	T	C	T	T	T	T	T	T	T	T	T	T	T	T	T	T	T
Adgrv1	13	81524667	T	C	missense_variant	rs257696739	T1476A	0.019	DELETERIOUS	T	C	T	T	T	C	T	T	T	T	T	T	T	T	T	T	T	T	T	T	T
Adgrv1	13	81419182	A	T	missense_variant	rs262491972	L5291M	0.007	DELETERIOUS	A	A	A	A	A	A	A	A	A	A	A	A	A	A	A	A	A	A	A	A	A
Adgrv1	13	81521252	C	T	missense_variant	rs263438114	R1675H	0.007	DELETERIOUS (WARNING LOW CONFIDENCE)	C	C	C	C	C	C	C	C	C	C	C	C	C	C	C	C	C	C	C	C	C
Adgrv1	13	81385997	C	T	missense_variant	rs265885120	A5822T	0.02	DELETERIOUS	C	C	C	C	C	C	C	C	C	C	C	C	C	C	C	C	C	C	C	C	C
Adgrv1	13	81493258	C	T	missense_variant	rs46172387	V3251I	0.028	DELETERIOUS	C	C	C	C	C	C	C	C	C	C	C	C	C	C	C	C	C	C	C	C	C
Adgrv1	13	81531594	C	A	missense_variant	rs47331863	E1875D	0.042	DELETERIOUS	C	C	C	C	C	C	C	C	C	C	A	C	C	C	C	C	C	C	C	C	C
Adgrv1	13	81481484	C	G	missense_variant	rs48533656	K3598N	0.025	DELETERIOUS	C	C	C	C	C	C	C	C	C	C	C	C	C	C	C	C	C	C	C	C	C
Adgrv1	13	81579564	A	C	missense_variant	rs48762476	V319G	0.011	DELETERIOUS	A	A	A	A	A	A	A	A	A	A	A	A	A	A	A	A	A	A	A	A	A
Adgrv1	13	81445253	G	A	missense_variant	rs49062795	T4205M	0.028	DELETERIOUS	G	G	G	G	G	G	G	G	G	G	G	G	G	G	G	G	G	G	G	G	G
Adgrv1	13	81424309	C	A	missense_variant	rs49119547	R4911M	0.03	DELETERIOUS	C	C	C	C	C	C	C	C	C	C	C	C	C	C	C	C	C	C	C	C	C
Adgrv1	13	81521078	C	T	missense_variant	rs49131853	G2453D	0.019	DELETERIOUS	C	C	C	C	C	C	C	C	C	C	C	C	C	C	C	C	C	C	C	C	C
Adgrv1	13	81521078	C	T	missense_variant	rs49131853	G1733D	0.021	DELETERIOUS	C	C	C	C	C	C	C	C	C	C	C	C	C	C	C	C	C	C	C	C	C
Adgrv1	13	81561527	C	G	missense_variant	rs50964183	D1116H	0	DELETERIOUS	N	C	G	N	C	C	C	C	N	N	C	N	C	N	G	C	N	C	C	C	C
Adgrv1	13	81561527	C	G	missense_variant	rs50964183	D396H	0	DELETERIOUS	N	C	G	N	C	C	C	C	N	N	C	N	C	N	G	C	N	C	C	C	C
Adgrv1	13	81440139	C	T	missense_variant	rs51091433	G4443R	0.041	DELETERIOUS	C	C	C	C	C	C	C	C	C	C	C	C	C	C	C	C	C	C	C	C	C
Adgrv1	13	81584051	A	G	missense_variant	rs51631059	V182A	0	DELETERIOUS	A	A	A	A	A	A	A	A	A	A	A	A	A	A	A	A	A	A	A	A	A
Agxt2	15	10388851	G	A	missense_variant	rs214716053	R338Q	0.019	DELETERIOUS	G	G	G	G	G	G	G	G	G	G	G	G	G	G	G	G	G	G	G	G	G
Agxt2	15	10388851	G	A	missense_variant	rs214716053	R310Q	0.019	DELETERIOUS	G	G	G	G	G	G	G	G	G	G	G	G	G	G	G	G	G	G	G	G	G
Agxt2	15	10392031	T	C	missense_variant	rs222048991	V389A	0.039	DELETERIOUS	T	T	T	T	T	T	T	T	T	T	T	T	T	T	T	T	T	T	T	T	T
Agxt2	15	10392031	T	C	missense_variant	rs222048991	V361A	0.04	DELETERIOUS	T	T	T	T	T	T	T	T	T	T	T	T	T	T	T	T	T	T	T	T	T
Agxt2	15	10381355	C	G	missense_variant	rs224211726	R232G	0.004	DELETERIOUS	C	C	C	C	C	C	C	C	C	C	C	C	C	C	C	C	C	C	C	C	C
Agxt2	15	10409505	A	T	missense_variant	rs227260776	Y497F	0.034	DELETERIOUS	A	A	A	A	A	A	A	A	A	A	A	A	A	A	A	A	A	A	A	A	A
Agxt2	15	10409505	A	T	missense_variant	rs227260776	Y525F	0.04	DELETERIOUS	A	A	A	A	A	A	A	A	A	A	A	A	A	A	A	A	A	A	A	A	A
Agxt2	15	10388154	G	A	missense_variant	rs261727564	C273Y	0.025	DELETERIOUS	G	G	G	G	G	G	G	G	G	G	G	G	G	G	G	G	G	G	G	G	G
Bmpr2	1	59870378	G	A	missense_variant	rs263869788	G1004S	0.023	DELETERIOUS (WARNING LOW CONFIDENCE)	G	G	G	G	G	G	G	G	G	G	G	G	G	G	G	G	G	G	G	G	G
Bmpr2	1	59867770	A	G	missense_variant	rs32810503	D674G	0.029	DELETERIOUS	A	A	A	A	A	A	A	A	A	A	A	A	A	A	A	A	A	A	A	A	A
Brca1	11	101512804	T	G	missense_variant	rs219367430	N1424T	0.02	DELETERIOUS	T	T	T	T	T	T	T	T	T	T	T	T	T	T	T	T	T	T	T	T	T
Brca1	11	101508128	G	A	missense_variant	rs226773350	S1546L	0.001	DELETERIOUS	G	G	G	G	G	G	G	G	G	G	G	G	G	G	G	G	G	G	G	G	G
Brca1	11	101509927	C	T	missense_variant	rs228354181	E1510K	0.035	DELETERIOUS	C	C	C	C	C	C	C	C	C	C	C	T	C	C	C	C	C	C	C	C	C
Brca1	11	101526178	G	C	missense_variant	rs228715973	Q377E	0.049	DELETERIOUS	G	G	G	G	G	G	G	G	G	G	G	G	G	G	G	G	G	G	G	G	G
Brca1	11	101510038	G	A	missense_variant	rs232285678	H1473Y	0.001	DELETERIOUS	G	G	G	G	G	G	G	G	G	G	G	G	G	G	G	G	G	G	G	G	G
Brca1	11	101524540	G	C	missense_variant	rs234122930	L923V	0.044	DELETERIOUS	G	G	G	G	G	G	G	G	G	G	G	G	G	G	G	G	G	G	G	G	G
Brca1	11	101525293	T	C	missense_variant	rs234722735	K672E	0.025	DELETERIOUS	T	T	T	T	T	T	T	T	T	T	T	T	T	T	T	T	T	T	T	T	T
Brca1	11	101549078	A	G	missense_variant	rs244372760	V6A	0.043	DELETERIOUS	A	A	A	A	A	A	A	A	A	A	A	A	A	A	A	A	A	A	A	A	A
Brca1	11	101510043	G	C	missense_variant	rs244965239	S1471C	0.003	DELETERIOUS	G	G	G	G	G	G	G	G	G	G	G	G	G	G	G	G	G	G	G	G	G
Brca1	11	101508023	T	C	missense_variant	rs248015636	E1581G	0.018	DELETERIOUS	T	T	T	T	T	T	T	T	T	T	T	T	T	T	T	T	T	T	T	T	T
Brca1	11	101525073	C	T	missense_variant	rs249356844	G745E	0.039	DELETERIOUS	C	C	C	C	C	C	C	C	C	C	C	C	C	C	C	C	C	C	C	C	C
Brca1	11	101489888	C	T	missense_variant	rs260591957	R1773H	0.006	DELETERIOUS	C	C	C	C	C	C	C	C	C	C	C	C	C	C	C	C	C	C	C	C	C
Brca1	11	101510037	T	C	missense_variant	rs265469883	H1473R	0.002	DELETERIOUS	T	T	T	T	T	T	T	T	T	T	T	T	T	T	T	T	T	T	T	T	T
Brca1	11	101526601	G	A	missense_variant	rs51408211	H236Y	0.012	DELETERIOUS	G	G	G	G	G	G	G	G	G	G	G	G	G	G	G	G	G	G	G	G	G
Cog7	7	121923348	C	T	missense_variant	rs32739049	R756H	0.025	DELETERIOUS	C	C	C	C	C	C	C	C	C	C	C	C	C	C	C	C	C	C	C	C	C
Cs	10	128350502	C	A	missense_variant	rs29358506	H55N	0.026	DELETERIOUS	C	C	C	C	C	C	C	C	C	C	C	C	C	C	C	C	C	C	C	C	A
Ctc1	11	69021127	C	G	missense_variant	rs241826318	A44G	0.044	DELETERIOUS (WARNING LOW CONFIDENCE)	C	C	C	C	C	C	C	C	C	C	C	C	C	C	C	C	C	C	C	C	C
Ctc1	11	69030838	G	T	missense_variant	rs245379168	E734D	0	DELETERIOUS (WARNING LOW CONFIDENCE)	G	G	G	G	G	G	G	G	G	G	G	G	G	G	G	G	G	G	G	G	G
Ctc1	11	69030838	G	T	missense_variant	rs245379168	E488D	0	DELETERIOUS (WARNING LOW CONFIDENCE)	G	G	G	G	G	G	G	G	G	G	G	G	G	G	G	G	G	G	G	G	G
Ctc1	11	69035572	C	G	missense_variant	rs26905587	L1091V	0	DELETERIOUS (WARNING LOW CONFIDENCE)	C	C	C	C	C	C	C	C	C	C	C	C	C	C	C	C	C	C	C	C	G
Ctc1	11	69035572	C	G	missense_variant	rs26905587	L1092V	0	DELETERIOUS (WARNING LOW CONFIDENCE)	C	C	C	C	C	C	C	C	C	C	C	C	C	C	C	C	C	C	C	C	G
Ctc1	11	69035572	C	G	missense_variant	rs26905587	L845V	0	DELETERIOUS (WARNING LOW CONFIDENCE)	C	C	C	C	C	C	C	C	C	C	C	C	C	C	C	C	C	C	C	C	G
Dapk1	13	60761635	T	A	missense_variant	rs49161067	L1354H	0.006	DELETERIOUS	T	T	T	T	T	T	T	T	A	T	T	A	T	T	T	T	T	T	T	T	T
Farsa	8	84867849	G	A	missense_variant	rs33603768	V376I	0.012	DELETERIOUS	G	G	G	G	G	G	G	G	G	G	G	G	G	G	G	G	G	G	G	G	A
Farsa	8	84867849	G	A	missense_variant	rs33603768	V375I	0.012	DELETERIOUS	G	G	G	G	G	G	G	G	G	G	G	G	G	G	G	G	G	G	G	G	A
Frk	10	34484221	G	A	missense_variant	rs49953918	G73S	0.002	DELETERIOUS	G	G	G	G	G	G	G	G	G	G	G	G	G	G	G	G	G	G	G	G	G
Helt	8	46292555	G	A	missense_variant	rs38462356	P135L	0.033	DELETERIOUS	G	G	G	G	G	G	G	G	G	G	G	G	G	G	G	G	G	G	G	G	G
Ifi204	1	173752015	C	G	missense_variant	rs31583000	E421D	0.033	DELETERIOUS	C	C	C	C	C	C	C	C	C	G	C	C	C	C	C	C	C	C	C	C	G
Inhbb	1	119420738	C	A	missense_variant	rs224915714	G117C	0	DELETERIOUS	C	C	C	C	C	C	C	C	C	C	C	C	C	C	C	C	C	C	C	C	C
Inhbb	1	119420728	C	T	missense_variant	rs236997786	R120H	0.032	DELETERIOUS	C	C	C	C	C	C	C	C	C	C	C	C	C	C	C	C	C	C	C	C	C
Itgal	7	127328512	C	T	missense_variant	rs212719252	T993I	0.029	DELETERIOUS (WARNING LOW CONFIDENCE)	C	C	C	C	C	C	C	C	C	C	C	C	C	C	C	C	C	C	C	C	C
Itgal	7	127328512	C	T	missense_variant	rs212719252	T992I	0.029	DELETERIOUS (WARNING LOW CONFIDENCE)	C	C	C	C	C	C	C	C	C	C	C	C	C	C	C	C	C	C	C	C	C
Itgal	7	127328512	C	T	missense_variant	rs212719252	T596I	0.029	DELETERIOUS (WARNING LOW CONFIDENCE)	C	C	C	C	C	C	C	C	C	C	C	C	C	C	C	C	C	C	C	C	C
Itgal	7	127306919	A	G	missense_variant	rs222663390	T394A	0.023	DELETERIOUS (WARNING LOW CONFIDENCE)	A	A	A	A	A	A	A	A	A	A	A	A	A	A	A	A	A	A	A	A	A
Itgal	7	127296473	G	A	missense_variant	rs226794093	S2N	0	DELETERIOUS (WARNING LOW CONFIDENCE)	G	G	G	G	G	G	G	G	G	G	G	G	G	G	G	G	G	G	G	G	G
Itgal	7	127314195	A	C	missense_variant	rs231060892	K655Q	0.01	DELETERIOUS (WARNING LOW CONFIDENCE)	A	A	A	A	A	A	A	A	A	A	A	A	A	A	A	A	A	A	A	A	A
Itgal	7	127314195	A	C	missense_variant	rs231060892	K259Q	0.01	DELETERIOUS (WARNING LOW CONFIDENCE)	A	A	A	A	A	A	A	A	A	A	A	A	A	A	A	A	A	A	A	A	A
Itgal	7	127314388	T	A	missense_variant	rs232858187	D292E	0.024	DELETERIOUS (WARNING LOW CONFIDENCE)	T	T	T	T	T	T	T	T	T	T	T	T	T	T	T	T	T	T	T	T	T
Itgal	7	127314388	T	A	missense_variant	rs232858187	D688E	0.025	DELETERIOUS (WARNING LOW CONFIDENCE)	T	T	T	T	T	T	T	T	T	T	T	T	T	T	T	T	T	T	T	T	T
Itgal	7	127310253	C	G	missense_variant	rs241327267	Q426E	0.014	DELETERIOUS (WARNING LOW CONFIDENCE)	C	C	C	C	C	C	C	C	C	C	C	C	C	C	C	C	C	C	C	C	C
Itgal	7	127310253	C	G	missense_variant	rs241327267	Q30E	0.02	DELETERIOUS (WARNING LOW CONFIDENCE)	C	C	C	C	C	C	C	C	C	C	C	C	C	C	C	C	C	C	C	C	C
Itgal	7	127301130	T	C	missense_variant	rs248846051	M148T	0.026	DELETERIOUS (WARNING LOW CONFIDENCE)	T	T	T	T	T	T	T	T	T	T	T	T	T	T	T	T	T	T	T	T	T
Itgal	7	127325241	C	T	missense_variant	rs252659992	T910I	0.008	DELETERIOUS (WARNING LOW CONFIDENCE)	C	C	C	C	C	C	C	C	C	C	C	C	C	C	C	C	C	C	C	C	C
Itgal	7	127325241	C	T	missense_variant	rs252659992	T911I	0.011	DELETERIOUS (WARNING LOW CONFIDENCE)	C	C	C	C	C	C	C	C	C	C	C	C	C	C	C	C	C	C	C	C	C
Itgal	7	127325241	C	T	missense_variant	rs252659992	T514I	0.013	DELETERIOUS (WARNING LOW CONFIDENCE)	C	C	C	C	C	C	C	C	C	C	C	C	C	C	C	C	C	C	C	C	C
Itgal	7	127328701	C	T	missense_variant	rs254772543	R1024W	0.003	DELETERIOUS (WARNING LOW CONFIDENCE)	C	T	T	T	T	T	T	C	C	T	C	T	C	C	C	C	C	T	C	C	C
Itgal	7	127328701	C	T	missense_variant	rs254772543	R1023W	0.003	DELETERIOUS (WARNING LOW CONFIDENCE)	C	T	T	T	T	T	T	C	C	T	C	T	C	C	C	C	C	T	C	C	C
Itgal	7	127328701	C	T	missense_variant	rs254772543	R627W	0.003	DELETERIOUS (WARNING LOW CONFIDENCE)	C	T	T	T	T	T	T	C	C	T	C	T	C	C	C	C	C	T	C	C	C
Itgal	7	127306913	C	G	missense_variant	rs33142118	P392A	0.02	DELETERIOUS (WARNING LOW CONFIDENCE)	C	C	C	C	C	C	C	C	C	C	C	C	C	C	C	C	C	C	C	C	C
Itgb8	12	119173376	G	A	synonymous_variant	rs33693148	H397H	0.049	DELETERIOUS	G	G	G	G	G	G	G	G	G	G	G	G	G	G	G	G	G	G	G	G	G
Itgb8	12	119202410	G	C	missense_variant	rs223201135	P129A	0.01	DELETERIOUS	G	G	G	G	G	G	G	G	G	G	G	G	G	G	G	G	G	G	G	G	G
Itgb8	12	119237720	G	A	missense_variant	rs225648884	L27F	0.022	DELETERIOUS	G	G	G	G	G	G	G	G	G	G	G	G	G	G	G	G	G	G	G	G	G
Itpr2	6	146190642	G	A	missense_variant	rs36696309	R2153W	0	DELETERIOUS	G	G	G	G	G	G	G	G	G	G	G	G	N	G	G	G	G	G	G	G	G
Itpr2	6	146190642	G	A	missense_variant	rs36696309	R2120W	0	DELETERIOUS	G	G	G	G	G	G	G	G	G	G	G	G	N	G	G	G	G	G	G	G	G
Kctd20	17	28958010	C	T	missense_variant	rs33283793	S38F	0.034	DELETERIOUS	C	C	C	C	C	C	C	C	C	C	C	C	C	C	C	C	C	C	C	C	T
Lamc2	1	153131944	C	G	missense_variant	rs261680139	S828T	0.023	DELETERIOUS	C	C	C	C	C	C	C	C	C	C	C	C	C	C	C	C	C	C	C	C	C
Lamc2	1	153154453	C	T	missense_variant	rs262065906	G148R	0	DELETERIOUS	C	C	C	C	C	C	C	C	C	C	C	C	C	C	C	C	C	C	C	C	C
Mapkapk3	9	107260113	T	C	missense_variant	rs29646363	D189G	0	DELETERIOUS	T	T	T	T	T	T	T	T	T	T	T	T	T	T	T	T	T	T	T	T	C
Myo1h	5	114360557	A	T	0	rs227362571	R905W	0.011	DELETERIOUS	A	A	A	A	A	A	A	A	A	A	A	A	A	A	A	A	A	A	A	A	A
Myo1h	5	114323389	C	T	missense_variant	rs46562579	R216C	0.007	DELETERIOUS	T	T	C	T	T	C	T	T	C	T	T	T	T	T	C	T	C	T	T	C	T
Nsd1	13	55313367	G	A	missense_variant	rs220632638	S2572N	0.015	DELETERIOUS (WARNING LOW CONFIDENCE)	G	G	G	G	G	G	G	G	G	G	G	G	G	G	G	G	G	G	G	G	G
Nsd1	13	55246559	C	T	missense_variant	rs230555641	R761C	0.003	DELETERIOUS	C	C	C	C	C	C	C	C	C	C	C	C	C	C	C	C	C	C	C	C	C
Nsd1	13	55246917	C	T	missense_variant	rs241710534	T880M	0.014	DELETERIOUS	C	C	C	C	C	C	C	T	C	C	C	C	C	C	C	C	C	C	C	C	C
Nsd1	13	55313175	T	G	missense_variant	rs48073998	I2508S	0.033	DELETERIOUS (WARNING LOW CONFIDENCE)	T	T	T	T	T	T	T	T	T	T	T	T	T	T	T	T	T	T	T	T	T
Nus1	10	52433392	G	A	missense_variant	rs13480615	V251M	0.015	DELETERIOUS	G	G	G	G	G	G	G	G	G	G	G	G	G	G	G	G	G	G	G	G	A
Plin3	17	56287853	T	A	missense_variant	rs213646512	S3C	0.031	DELETERIOUS	T	T	T	T	T	T	T	T	T	T	T	T	T	T	T	T	T	T	T	T	T
Polr3e	7	120933356	G	T	missense_variant	rs32113739	S205I	0.033	DELETERIOUS	G	G	G	G	G	G	G	G	G	G	G	G	G	G	G	G	G	G	G	G	T
Polr3e	7	120933356	G	T	missense_variant	rs32113739	S231I	0.042	DELETERIOUS	G	G	G	G	G	G	G	G	G	G	G	G	G	G	G	G	G	G	G	G	T
Rnf44	13	54682001	C	T	missense_variant	rs13481816	R390Q	0.019	DELETERIOUS	C	C	C	C	C	C	C	C	C	C	C	C	C	C	C	C	C	C	C	C	T
Rrbp1	2	143967489	G	A	missense_variant	rs27264388	A916V	0.048	DELETERIOUS	G	G	A	G	G	A	G	G	G	G	A	G	A	A	A	A	G	G	A	G	G
Rrbp1	2	143949277	T	C	missense_variant	rs27279784	Q1402R	0.022	DELETERIOUS	T	T	T	T	T	T	T	T	T	T	T	T	T	T	T	T	T	T	T	T	C
Rrbp1	2	143988643	C	G	missense_variant	rs52573718	A535P	0.019	DELETERIOUS	C	C	C	C	C	C	C	C	C	C	C	C	C	C	C	C	C	C	C	C	C
Safb2	17	56564592	G	C	missense_variant	rs252480067	H854D	0.005	DELETERIOUS	G	G	G	G	G	G	G	G	G	G	G	G	G	G	G	G	G	G	G	G	G
Safb2	17	56564592	G	C	missense_variant	rs252480067	H218D	0.002	DELETERIOUS	G	G	G	G	G	G	G	G	G	G	G	G	G	G	G	G	G	G	G	G	G
Safb2	17	56564592	G	C	missense_variant	rs252480067	H219D	0.002	DELETERIOUS	G	G	G	G	G	G	G	G	G	G	G	G	G	G	G	G	G	G	G	G	G
Slc22a19	19	7682801	C	T	missense_variant	rs264388735	V415M	0.038	DELETERIOUS	C	C	C	C	C	C	C	C	C	C	C	C	C	C	C	C	C	C	C	C	C
Slc22a19	19	7710845	C	T	missense_variant	rs38302589	V117M	0.045	DELETERIOUS	N	T	N	N	N	N	N	N	N	N	N	N	N	C	C	N	N	N	N	C	T
Smarcal1	1	72585807	G	A	missense_variant	rs225083018	G38S	0	DELETERIOUS (WARNING LOW CONFIDENCE)	G	G	G	G	G	G	G	G	G	G	G	G	G	G	G	G	G	G	G	G	G
Smarcal1	1	72585819	G	C	missense_variant	rs252786814	A42P	0.022	DELETERIOUS (WARNING LOW CONFIDENCE)	G	G	G	G	G	G	G	G	G	G	G	G	G	G	G	G	G	G	G	G	G
Spef2	15	9713210	C	T	missense_variant	rs230882924	E416K	0.008	DELETERIOUS	C	C	C	C	C	C	C	C	C	C	C	C	C	C	C	C	C	C	C	C	C
Spef2	15	9713210	C	T	missense_variant	rs230882924	E359K	0.008	DELETERIOUS	C	C	C	C	C	C	C	C	C	C	C	C	C	C	C	C	C	C	C	C	C
Spef2	15	9687976	A	G	missense_variant	rs234817411	M453T	0.003	DELETERIOUS	A	A	A	A	A	A	A	A	A	A	A	A	A	A	A	A	A	A	A	A	A
Spef2	15	9687976	A	G	missense_variant	rs234817411	M510T	0.004	DELETERIOUS	A	A	A	A	A	A	A	A	A	A	A	A	A	A	A	A	A	A	A	A	A
Spef2	15	9652954	A	G	missense_variant	rs246048724	W914R	0	DELETERIOUS	A	A	A	A	A	A	A	A	A	A	A	A	A	A	A	A	A	A	A	A	A
Spef2	15	9713134	G	A	missense_variant	rs32712266	T384M	0.012	DELETERIOUS	G	G	G	G	G	G	G	G	G	G	G	G	G	G	G	G	G	G	G	G	G
Spef2	15	9713134	G	A	missense_variant	rs32712266	T441M	0.017	DELETERIOUS	G	G	G	G	G	G	G	G	G	G	G	G	G	G	G	G	G	G	G	G	G
Spef2	15	9704440	G	A	missense_variant	rs32713685	T429I	0.011	DELETERIOUS	G	G	G	G	G	G	G	G	G	G	G	G	G	G	G	G	G	G	G	G	G
Spef2	15	9704440	G	A	missense_variant	rs32713685	T486I	0.026	DELETERIOUS	G	G	G	G	G	G	G	G	G	G	G	G	G	G	G	G	G	G	G	G	G
Spta1	1	174229326	G	T	missense_variant	rs33783052	D1882Y	0.002	DELETERIOUS	G	G	G	G	G	G	G	G	G	T	T	G	G	G	T	G	G	G	G	G	G
Spta1	1	174178746	T	C	missense_variant	rs33784898	F158S	0.001	DELETERIOUS	T	T	T	T	T	T	T	T	C	T	T	T	T	T	T	T	T	T	T	T	T
Spta1	1	174240192	T	A	missense_variant	rs50017007	L2062M	0	DELETERIOUS	A	A	A	A	T	A	A	A	T	T	A	A	A	A	A	A	T	A	A	T	A
Tnrc6a	7	123192892	T	C	missense_variant	rs230877885	S1878P	0.019	DELETERIOUS	T	T	T	T	T	T	T	T	T	T	T	T	T	T	T	T	T	T	T	T	T
Tnrc6a	7	123169959	A	C	missense_variant	rs235669043	N324T	0.028	DELETERIOUS	A	A	A	A	A	A	A	A	A	A	A	A	A	A	A	A	A	A	A	A	A
Tnrc6a	7	123170924	A	T	missense_variant	rs238175478	S646C	0.029	DELETERIOUS	A	A	A	A	A	A	A	A	A	A	A	T	A	A	A	A	A	A	A	A	A
Tnrc6a	7	123171405	G	A	missense_variant	rs261069511	G806D	0.039	DELETERIOUS	G	G	G	G	G	G	G	G	G	G	G	G	G	G	G	G	G	G	G	G	G
Tnrc6a	7	123170520	G	A	missense_variant	rs32788026	G511D	0.048	DELETERIOUS	G	G	G	G	G	G	G	G	G	G	G	G	G	G	G	G	G	G	G	G	G
Ube3b	5	114418630	G	T	0	rs6365758	Q1007H	0.003	DELETERIOUS	G	G	G	G	G	G	G	G	G	G	G	G	G	G	G	G	G	G	G	G	G
Ube3b	5	114388742	G	A	missense_variant	rs250121961	R101Q	0.011	DELETERIOUS	G	G	G	G	G	G	G	G	G	G	G	G	G	G	G	G	G	G	G	G	G
Ube3b	5	114402611	C	T	missense_variant	rs45823359	R460W	0.019	DELETERIOUS	C	C	C	C	C	C	C	C	C	C	C	C	C	C	C	C	C	C	C	C	C
Wdr41	13	95013191	A	T	missense_variant	rs30321508	D439V	0	DELETERIOUS (WARNING LOW CONFIDENCE)	A	A	T	A	A	A	A	A	T	A	T	A	A	A	A	A	T	A	A	A	A
Wdr41	13	95008865	A	C	missense_variant	rs30325704	E194A	0.009	DELETERIOUS (WARNING LOW CONFIDENCE)	A	A	C	A	A	A	A	A	C	A	C	A	A	A	A	A	C	A	A	A	A
Wdr41	13	95008817	C	T	missense_variant	rs30325705	A178V	0.007	DELETERIOUS (WARNING LOW CONFIDENCE)	C	C	C	C	C	C	C	C	C	C	C	C	C	C	C	C	C	C	C	C	C
Xrcc5	1	72338966	G	A	missense_variant	rs227773942	A374T	0.031	DELETERIOUS	G	G	G	G	G	G	G	G	G	G	G	G	G	G	G	G	G	G	G	G	G
Xrcc5	1	72340062	A	T	missense_variant	rs32125360	K442M	0.002	DELETERIOUS	A	A	A	A	A	A	A	A	A	A	A	A	A	A	A	A	A	A	A	A	T
Xrcc5	1	72319025	G	T	missense_variant	rs39011944	G173V	0.022	DELETERIOUS	G	G	G	G	G	G	G	G	G	G	G	G	G	G	G	G	G	G	G	G	G
Zfp182	X	21030887	T	G	missense_variant	rs219544790	E390A	0.004	DELETERIOUS	T	T	T	T	T	T	T	T	T	T	T	T	T	T	T	T	T	T	T	T	T
Zfp182	X	21030887	T	G	missense_variant	rs219544790	E354A	0.005	DELETERIOUS	T	T	T	T	T	T	T	T	T	T	T	T	T	T	T	T	T	T	T	T	T
Zfp764	7	127405107	C	T	missense_variant	rs33149382	R284H	0.048	DELETERIOUS	C	C	C	C	C	C	C	C	C	C	C	C	C	C	C	C	C	C	C	C	C
Zfp764	7	127406550	G	T	missense_variant	rs33154836	P19T	0.019	DELETERIOUS	G	G	G	G	G	G	G	G	G	G	G	G	G	G	G	G	G	G	G	G	G
Wdr41	13	94999872	G	A		rs223899876	D119N	0	DELETERIOUS (WARNING LOW CONFIDENCE)	G	G	G	G	G	G	G	G	G	G	G	G	G	G	G	G	G	G	G	G	G
Wdr41	13	94978579	A	C		rs240794508	D54A	0.009	DELETERIOUS (WARNING LOW CONFIDENCE)	A	A	C	A	A	A	A	A	C	A	C	A	A	A	A	A	C	A	A	A	A
Mean specific activity (nmol.mg.hour)										0.00875	0.01507	0.0193	0.01927	0.01945	0.0212	0.0215	0.02133	0.02137	0.02178	0.0236	0.02382	0.02428	0.025	0.0265	0.02642	0.02793	0.03195	0.04528	0.07213	0.23

[truncated: 1 more sheets: GM3GC1]
