# Supplementary material for: A mouse systems genetics approach reveals common and uncommon genetic modifiers of hepatic lysosomal enzyme activities and glycosphingolipids
Source: Research Square preprint supplement (doi:10.21203/rs.3.rs-2362074/v1), 2022-12-28
Supplement: Supplementary file 5 [file e25b2e1ad823b76d02214039.xlsx]

## Sheet: gProfiler_mmusculus_30-6-2022 8
Table S4. Gene ontology enrichment analysis for glycosphingolipid levels
Source	Term_name	Term_id	Adjusted_p_value	Negative_log10_of_adjusted_p_value	Term_size	Query_size	Intersection_size	Effective_domain_size	Intersections
GO:MF	protein binding	GO:0005515	9.10812e-31	30.0406	10481	1493	840	25412	OPRK1,SNTG1,EYA1,TMEFF2,HECW2,ANKRD44,SF3B1,MOB4,BOLL,PLCL1,SATB2,TYW5,UNC80,CPS1,ERBB4,ATIC,IGFBP5,TNS1,CXCR2,CXCR1,ARPC2,VIL1,USP37,DNAJB2,SLC4A3,EPHA4,DNER,CAB39,DPP10,MDM4,CRB1,PLA2G4A,ASTN1,RGS7,CEP170,DUSP10,KCTD3,PROX1,DTL,IL2RA,ANKRD16,MALRD1,PIP4K2A,ARMC3,MSRB2,ETL4,GPR158,MYO3A,ACVR2A,XIRP2,CERS6,LRP2,NFE2L2,TTC30A1,UBE2E3,ITGA4,NEUROD1,PDE1A,DNAJC10,FRZB,NUP35,HSD17B12,RASGRP1,SPG11,JA…
GO:MF	ion binding	GO:0043167	8.88611e-14	13.0513	5914	1493	482	25412	ST18,EYA1,OSGEPL1,STK17B,MOB4,PLCL1,TYW5,CPS1,ERBB4,VIL1,ZFP142,EPHA4,DNER,CAB39,MDM4,CRB1,PLA2G4A,HMCN1,EDEM3,RPS6KC1,PIP4K2A,MSRB2,MYO3A,ACVR2A,XIRP2,LRP2,UBE2E3,PDE1A,ZFP804A,RASGRP1,JAG1,SRC,DHX35,GNAS,ZFP931,CDH26,EEF1A2,ZFHX4,CAR1,CYP7B1,ARMC1,PDE7A,FAT4,HSPA4L,TIPARP,PMVK,UBE2Q1,PGLYRP4,PGLYRP3,FLG2,TCHH,TCHHL1,PI4KB,PIP5K1A,ANXA9,SETDB1,OTUD7B,RNF115,NOTCH2,HAO2,WARS2,TTF2,ATP1A1,COL11A1,…
GO:MF	binding	GO:0005488	2.38205e-13	12.623	16232	1493	1096	25412	OPRK1,ST18,SNTG1,EYA1,TMEFF2,OSGEPL1,STK17B,HECW2,ANKRD44,SF3B1,COQ10B,MOB4,BOLL,PLCL1,HSFY2,SATB2,TYW5,UNC80,CPS1,ERBB4,ATIC,IGFBP5,TNS1,CXCR2,CXCR1,ARPC2,VIL1,USP37,ZFP142,DNAJB2,SLC4A3,EPHA4,DNER,CAB39,DPP10,MDM4,CRB1,PLA2G4A,HMCN1,EDEM3,ASTN1,RGS7,CEP170,DUSP10,KCTD3,PROX1,RPS6KC1,ANGEL2,DTL,LAMB3,IL2RA,ANKRD16,MALRD1,PIP4K2A,ARMC3,MSRB2,ETL4,GPR158,MYO3A,ACVR2A,KCNH7,XIRP2,CERS6,LRP2,NFE2L2,…
GO:MF	ATP binding	GO:0005524	9.49041e-11	10.0227	1486	1493	158	25412	STK17B,CPS1,ERBB4,EPHA4,RPS6KC1,PIP4K2A,MYO3A,ACVR2A,UBE2E3,SRC,DHX35,HSPA4L,PMVK,UBE2Q1,PI4KB,PIP5K1A,WARS2,TTF2,ATP1A1,ALPK1,CDK6,PEX1,CDK14,ABCF2,PRKAG2,STK32B,TEC,PAICS,EPHA5,HFM1,PHKG1,BAZ1B,CFTR,AGK,EIF2AK3,MAGI1,TRNT1,NARS2,SBK1,INSR,WRN,MYLK3,ABCC12,MYO6,ULK4,MTHFD1L,MAP3K5,ENPP1,FRK,UBE2D1,IPMK,BCR,SYN3,ATP2B1,ACSS3,NAV3,BBS10,KIF5A,ABCA13,MYH13,ACACA,CMPK2,ADCK1,MAK,TRIP13,PLK2,UBE2E2,P…
GO:MF	carbohydrate derivative binding	GO:0097367	1.80924e-10	9.7425	2278	1493	217	25412	STK17B,CPS1,ERBB4,VIL1,EPHA4,RPS6KC1,PIP4K2A,MYO3A,ACVR2A,UBE2E3,HSD17B12,SRC,DHX35,GNAS,EEF1A2,HSPA4L,PMVK,UBE2Q1,PGLYRP4,PGLYRP3,PI4KB,PIP5K1A,CTSK,REG4,HAO2,WARS2,TTF2,ATP1A1,COL11A1,ALPK1,CNGB3,RASEF,CDK6,PEX1,CDK14,ABCF2,PRKAG2,STK32B,TEC,PAICS,EPHA5,HFM1,PHKG1,TYW1,BAZ1B,CFTR,AGK,EIF2AK3,LRRTM4,MAGI1,TRNT1,BMS1,PGLYRP1,NARS2,SBK1,INSR,WRN,MYLK3,ABCC12,LIPC,MYO6,ULK4,MTHFD1L,MAP3K5,ENPP1,AKA…
GO:MF	adenyl ribonucleotide binding	GO:0032559	2.63532e-10	9.57917	1556	1493	162	25412	STK17B,CPS1,ERBB4,EPHA4,RPS6KC1,PIP4K2A,MYO3A,ACVR2A,UBE2E3,SRC,DHX35,HSPA4L,PMVK,UBE2Q1,PI4KB,PIP5K1A,WARS2,TTF2,ATP1A1,ALPK1,CDK6,PEX1,CDK14,ABCF2,PRKAG2,STK32B,TEC,PAICS,EPHA5,HFM1,PHKG1,BAZ1B,CFTR,AGK,EIF2AK3,MAGI1,TRNT1,NARS2,SBK1,INSR,WRN,MYLK3,ABCC12,MYO6,ULK4,MTHFD1L,MAP3K5,ENPP1,AKAP7,FRK,UBE2D1,IPMK,BCR,SYN3,ATP2B1,ACSS3,NAV3,BBS10,KIF5A,ABCA13,MYH13,ACACA,CMPK2,ADCK1,MAK,TRIP13,PDE4D,P…
GO:MF	adenyl nucleotide binding	GO:0030554	5.51277e-10	9.25863	1570	1493	162	25412	STK17B,CPS1,ERBB4,EPHA4,RPS6KC1,PIP4K2A,MYO3A,ACVR2A,UBE2E3,SRC,DHX35,HSPA4L,PMVK,UBE2Q1,PI4KB,PIP5K1A,WARS2,TTF2,ATP1A1,ALPK1,CDK6,PEX1,CDK14,ABCF2,PRKAG2,STK32B,TEC,PAICS,EPHA5,HFM1,PHKG1,BAZ1B,CFTR,AGK,EIF2AK3,MAGI1,TRNT1,NARS2,SBK1,INSR,WRN,MYLK3,ABCC12,MYO6,ULK4,MTHFD1L,MAP3K5,ENPP1,AKAP7,FRK,UBE2D1,IPMK,BCR,SYN3,ATP2B1,ACSS3,NAV3,BBS10,KIF5A,ABCA13,MYH13,ACACA,CMPK2,ADCK1,MAK,TRIP13,PDE4D,P…
GO:MF	purine ribonucleoside triphosphate binding	GO:0035639	4.98009e-09	8.30276	1839	1493	179	25412	STK17B,CPS1,ERBB4,EPHA4,RPS6KC1,PIP4K2A,MYO3A,ACVR2A,UBE2E3,SRC,DHX35,GNAS,EEF1A2,HSPA4L,PMVK,UBE2Q1,PI4KB,PIP5K1A,WARS2,TTF2,ATP1A1,ALPK1,RASEF,CDK6,PEX1,CDK14,ABCF2,PRKAG2,STK32B,TEC,PAICS,EPHA5,HFM1,PHKG1,BAZ1B,CFTR,AGK,EIF2AK3,MAGI1,TRNT1,BMS1,NARS2,SBK1,INSR,WRN,MYLK3,ABCC12,MYO6,ULK4,MTHFD1L,MAP3K5,ENPP1,FRK,UBE2D1,IPMK,BCR,RTCB,SYN3,ATP2B1,ACSS3,NAV3,BBS10,RAB21,KIF5A,ABCA13,MYH13,ACACA,CM…
GO:MF	ribonucleotide binding	GO:0032553	6.21312e-09	8.20669	1938	1493	186	25412	STK17B,CPS1,ERBB4,EPHA4,RPS6KC1,PIP4K2A,MYO3A,ACVR2A,UBE2E3,SRC,DHX35,GNAS,EEF1A2,HSPA4L,PMVK,UBE2Q1,PI4KB,PIP5K1A,HAO2,WARS2,TTF2,ATP1A1,ALPK1,CNGB3,RASEF,CDK6,PEX1,CDK14,ABCF2,PRKAG2,STK32B,TEC,PAICS,EPHA5,HFM1,PHKG1,TYW1,BAZ1B,CFTR,AGK,EIF2AK3,MAGI1,TRNT1,BMS1,NARS2,SBK1,INSR,WRN,MYLK3,ABCC12,MYO6,ULK4,MTHFD1L,MAP3K5,ENPP1,AKAP7,FRK,UBE2D1,IPMK,BCR,RTCB,SYN3,ATP2B1,ACSS3,NAV3,BBS10,RAB21,KIF5A…
GO:MF	purine ribonucleotide binding	GO:0032555	8.85039e-09	8.05304	1919	1493	184	25412	STK17B,CPS1,ERBB4,EPHA4,RPS6KC1,PIP4K2A,MYO3A,ACVR2A,UBE2E3,SRC,DHX35,GNAS,EEF1A2,HSPA4L,PMVK,UBE2Q1,PI4KB,PIP5K1A,WARS2,TTF2,ATP1A1,ALPK1,CNGB3,RASEF,CDK6,PEX1,CDK14,ABCF2,PRKAG2,STK32B,TEC,PAICS,EPHA5,HFM1,PHKG1,BAZ1B,CFTR,AGK,EIF2AK3,MAGI1,TRNT1,BMS1,NARS2,SBK1,INSR,WRN,MYLK3,ABCC12,MYO6,ULK4,MTHFD1L,MAP3K5,ENPP1,AKAP7,FRK,UBE2D1,IPMK,BCR,RTCB,SYN3,ATP2B1,ACSS3,NAV3,BBS10,RAB21,KIF5A,ABCA13,MY…
GO:MF	purine nucleotide binding	GO:0017076	1.70613e-08	7.76799	1934	1493	184	25412	STK17B,CPS1,ERBB4,EPHA4,RPS6KC1,PIP4K2A,MYO3A,ACVR2A,UBE2E3,SRC,DHX35,GNAS,EEF1A2,HSPA4L,PMVK,UBE2Q1,PI4KB,PIP5K1A,WARS2,TTF2,ATP1A1,ALPK1,CNGB3,RASEF,CDK6,PEX1,CDK14,ABCF2,PRKAG2,STK32B,TEC,PAICS,EPHA5,HFM1,PHKG1,BAZ1B,CFTR,AGK,EIF2AK3,MAGI1,TRNT1,BMS1,NARS2,SBK1,INSR,WRN,MYLK3,ABCC12,MYO6,ULK4,MTHFD1L,MAP3K5,ENPP1,AKAP7,FRK,UBE2D1,IPMK,BCR,RTCB,SYN3,ATP2B1,ACSS3,NAV3,BBS10,RAB21,KIF5A,ABCA13,MY…
GO:MF	cation binding	GO:0043169	2.93415e-07	6.53252	4191	1493	335	25412	ST18,EYA1,OSGEPL1,MOB4,TYW5,CPS1,VIL1,ZFP142,DNER,CAB39,MDM4,CRB1,PLA2G4A,HMCN1,EDEM3,MSRB2,ACVR2A,XIRP2,LRP2,PDE1A,ZFP804A,RASGRP1,JAG1,GNAS,ZFP931,CDH26,ZFHX4,CAR1,CYP7B1,ARMC1,PDE7A,FAT4,TIPARP,PGLYRP4,PGLYRP3,FLG2,TCHH,TCHHL1,ANXA9,SETDB1,OTUD7B,RNF115,NOTCH2,TTF2,ATP1A1,COL11A1,DPYD,LMO4,MMP16,RNF38,ASTN2,RASEF,KDM4C,BNC2,AGBL4,PHC2,ANKIB1,STEAP1,ZFP804B,PRKAG2,HTR5A,SELENOI,STK32B,KCNIP4,LI…
GO:MF	catalytic activity, acting on a protein	GO:0140096	2.93856e-07	6.53187	2309	1493	206	25412	PCMTD1,EYA1,STK17B,HECW2,CPS1,ERBB4,USP37,EPHA4,DPP10,DUSP10,RPS6KC1,DTL,OTUD1,MYO3A,ACVR2A,UBE2E3,DNAJC10,SRC,CTSZ,TIPARP,UBE2Q1,SETDB1,CTSK,OTUD7B,RNF115,ALPK1,TTLL7,MMP16,WWP1,RNF38,MUP5,KDM4C,AGBL4,PSMB2,PTP4A2,CDK6,ANKIB1,CDK14,HGF,PRKAG2,DPP6,UBE3C,STK32B,TEC,EPHA5,MMP17,PHKG1,RABGEF1,BAZ1B,EIF2AK3,RMND5A,PDZRN3,PRMT8,ADAMTS17,AKAP13,AGBL1,PRCP,SBK1,SETD1A,PRSS53,KAT8,GLRX3,INSR,ABHD13,MYLK…
GO:MF	nucleotide binding	GO:0000166	3.54539e-07	6.45034	2188	1493	197	25412	STK17B,CPS1,ERBB4,EPHA4,RPS6KC1,PIP4K2A,MYO3A,ACVR2A,UBE2E3,SRC,DHX35,GNAS,EEF1A2,HSPA4L,PMVK,UBE2Q1,CHTOP,PI4KB,PIP5K1A,HAO2,WARS2,TTF2,ATP1A1,DPYD,ALPK1,CNGB3,RASEF,CDK6,PEX1,CDK14,ABCF2,PRKAG2,STK32B,G6PD2,TEC,PAICS,EPHA5,HFM1,PHKG1,TYW1,BAZ1B,CFTR,AGK,EIF2AK3,MAGI1,TRNT1,BMS1,NARS2,SBK1,INSR,WRN,MYLK3,ABCC12,MYO6,ULK4,MTHFD1L,MAP3K5,ENPP1,AKAP7,FRK,UBE2D1,IPMK,BCR,CRY1,RTCB,SYN3,ATP2B1,ACSS3,…
GO:MF	nucleoside phosphate binding	GO:1901265	3.54539e-07	6.45034	2188	1493	197	25412	STK17B,CPS1,ERBB4,EPHA4,RPS6KC1,PIP4K2A,MYO3A,ACVR2A,UBE2E3,SRC,DHX35,GNAS,EEF1A2,HSPA4L,PMVK,UBE2Q1,CHTOP,PI4KB,PIP5K1A,HAO2,WARS2,TTF2,ATP1A1,DPYD,ALPK1,CNGB3,RASEF,CDK6,PEX1,CDK14,ABCF2,PRKAG2,STK32B,G6PD2,TEC,PAICS,EPHA5,HFM1,PHKG1,TYW1,BAZ1B,CFTR,AGK,EIF2AK3,MAGI1,TRNT1,BMS1,NARS2,SBK1,INSR,WRN,MYLK3,ABCC12,MYO6,ULK4,MTHFD1L,MAP3K5,ENPP1,AKAP7,FRK,UBE2D1,IPMK,BCR,CRY1,RTCB,SYN3,ATP2B1,ACSS3,…
GO:MF	anion binding	GO:0043168	8.95407e-07	6.04798	2439	1493	213	25412	STK17B,PLCL1,CPS1,ERBB4,VIL1,EPHA4,PLA2G4A,RPS6KC1,PIP4K2A,MYO3A,ACVR2A,UBE2E3,SRC,DHX35,GNAS,EEF1A2,HSPA4L,PMVK,UBE2Q1,PI4KB,PIP5K1A,ANXA9,HAO2,WARS2,TTF2,ATP1A1,DPYD,ALPK1,CNGB3,ASTN2,RASEF,CDK6,PEX1,CDK14,ABCF2,PRKAG2,STK32B,TEC,PAICS,EPHA5,HFM1,PHKG1,TYW1,BAZ1B,CFTR,AGK,EIF2AK3,MAGI1,TRNT1,GRM7,BMS1,PLEKHA5,NARS2,SBK1,INSR,WRN,MYLK3,ABCC12,GOT2,ANXA2,MYO6,ULK4,MTHFD1L,MAP3K5,ENPP1,AKAP7,FRK,U…
GO:MF	metal ion binding	GO:0046872	1.17155e-06	5.93124	4091	1493	325	25412	ST18,EYA1,OSGEPL1,MOB4,TYW5,CPS1,VIL1,ZFP142,DNER,CAB39,MDM4,CRB1,PLA2G4A,HMCN1,EDEM3,MSRB2,ACVR2A,XIRP2,LRP2,PDE1A,ZFP804A,RASGRP1,JAG1,GNAS,ZFP931,CDH26,ZFHX4,CAR1,CYP7B1,ARMC1,PDE7A,FAT4,TIPARP,PGLYRP4,PGLYRP3,FLG2,TCHH,TCHHL1,ANXA9,SETDB1,OTUD7B,RNF115,NOTCH2,TTF2,ATP1A1,COL11A1,DPYD,LMO4,MMP16,RNF38,ASTN2,RASEF,KDM4C,BNC2,AGBL4,PHC2,ANKIB1,STEAP1,ZFP804B,SELENOI,STK32B,KCNIP4,LIMCH1,TEC,ADGR…
GO:MF	catalytic activity	GO:0003824	3.20505e-06	5.49417	5730	1493	429	25412	PCMTD1,EYA1,OSGEPL1,STK17B,HECW2,PGAP1,PLCL1,TYW5,CPS1,ERBB4,ATIC,USP37,EPHA4,DPP10,PLA2G4A,EDEM3,DUSP10,RPS6KC1,ANGEL2,DTL,PIP4K2A,MSRB2,OTUD1,MYO3A,ACVR2A,CERS6,UBE2E3,CERKL,PDE1A,DNAJC10,HSD17B12,MACROD2,SRC,DHX35,GNAS,CTSZ,ATP5E,EEF1A2,CAR1,CYP7B1,PDE7A,HSPA4L,TIPARP,PMVK,UBE2Q1,PGLYRP4,PGLYRP3,PI4KB,PIP5K1A,SETDB1,CTSK,OTUD7B,RNF115,HSD3B1,HAO2,WARS2,TTF2,ATP1A1,AGL,PLPPR5,DPYD,UGT8A,ALPK1,T…
GO:MF	phosphotransferase activity, alcohol group as acceptor	GO:0016773	1.01309e-05	4.99435	698	1493	79	25412	STK17B,ERBB4,EPHA4,RPS6KC1,PIP4K2A,MYO3A,ACVR2A,CERKL,SRC,PI4KB,PIP5K1A,ALPK1,MUP5,CDK6,CDK14,PRKAG2,STK32B,TEC,EPHA5,PHKG1,BAZ1B,AGK,EIF2AK3,AKAP13,SBK1,INSR,MYLK3,ULK4,MAP3K5,FRK,IPMK,BCR,ADCK1,MAK,PLK2,CSNK1E,TWF1,PRKDC,PDPK1,STK32A,PIP5K1B,CASK,TAF1,NRK,AKT3,CDC42BPA,STRADB,BMPR2,SPEG,MARK1,BMPR1B,LYN,CHEK2,GRK3,MVK,MET,PRKCB,BCKDK,MAPKAPK3,ERBB3,TAOK1,STRADA,ITPK1,VRK1,MARK3,PFKP,NTRK2,DAPK1…
GO:MF	small molecule binding	GO:0036094	1.21997e-05	4.91365	2561	1493	216	25412	STK17B,PLCL1,CPS1,ERBB4,EPHA4,RPS6KC1,PIP4K2A,MYO3A,ACVR2A,OSBPL6,UBE2E3,SRC,DHX35,GNAS,EEF1A2,HSPA4L,PMVK,UBE2Q1,CHTOP,PI4KB,PIP5K1A,HAO2,WARS2,TTF2,ATP1A1,DPYD,ALPK1,CNGB3,MUP5,ASTN2,RASEF,CDK6,PEX1,CDK14,ABCF2,PRKAG2,STK32B,G6PD2,TEC,PAICS,EPHA5,HFM1,PHKG1,TYW1,BAZ1B,CFTR,AGK,EIF2AK3,MAGI1,TRNT1,GRM7,BMS1,CLEC4N,NARS2,SBK1,INSR,WRN,MYLK3,ABCC12,GOT2,MYO6,ULK4,MTHFD1L,MAP3K5,ENPP1,AKAP7,FRK,UBE…
GO:MF	calcium ion binding	GO:0005509	1.84376e-05	4.7343	720	1493	80	25412	CPS1,VIL1,DNER,CAB39,CRB1,PLA2G4A,HMCN1,EDEM3,LRP2,RASGRP1,JAG1,CDH26,FAT4,FLG2,TCHH,TCHHL1,ANXA9,NOTCH2,ASTN2,RASEF,KCNIP4,ADGRL3,CALN1,MMRN1,FBLN2,EDEM1,GRM7,EFCAB12,CLEC4N,SYT8,FAT3,ANXA2,PCDH15,SLIT3,TPO,NKD2,MCTP1,ADGRV1,PCDH17,PCDH9,CDH10,CDH12,EFCAB1,MASP1,FSTL1,SMOC2,MCC,CABP1,CDH20,CACNA1E,LRP1B,SYT13,TGM2,FSTL5,MACF1,MEGF6,ANXA4,C2CD5,ITPR2,MCTP2,USP32,DLK1,JAG2,SPOCK1,CETN3,EDIL3,S100Z…
GO:MF	kinase activity	GO:0016301	3.18407e-05	4.49702	779	1493	84	25412	STK17B,ERBB4,EPHA4,RPS6KC1,PIP4K2A,MYO3A,ACVR2A,CERKL,SRC,PMVK,PI4KB,PIP5K1A,ALPK1,MUP5,CDK6,CDK14,PRKAG2,STK32B,TEC,EPHA5,PHKG1,BAZ1B,AGK,EIF2AK3,AKAP13,SBK1,INSR,MYLK3,ULK4,MAP3K5,FRK,IPMK,BCR,CMPK2,ADCK1,MAK,PLK2,CSNK1E,TWF1,PRKDC,PDPK1,STK32A,PIP5K1B,CASK,TAF1,NRK,AKT3,CDC42BPA,STRADB,BMPR2,SPEG,MARK1,BMPR1B,LYN,CHEK2,GRK3,MVK,GIT2,MET,TPK1,PRKCB,BCKDK,MAPKAPK3,ERBB3,TAOK1,MPP3,STRADA,ITPK1,V…
GO:MF	transferase activity	GO:0016740	7.49299e-05	4.12534	2287	1493	193	25412	PCMTD1,OSGEPL1,STK17B,HECW2,ERBB4,ATIC,EPHA4,PLA2G4A,RPS6KC1,DTL,PIP4K2A,MYO3A,ACVR2A,CERS6,UBE2E3,CERKL,SRC,TIPARP,PMVK,UBE2Q1,PI4KB,PIP5K1A,SETDB1,RNF115,AGL,UGT8A,ALPK1,WWP1,RNF38,MUP5,EIF2B3,CDK6,ANKIB1,CDK14,PRKAG2,UBE3C,HADHB,SELENOI,STK32B,HS3ST1,TEC,EPHA5,PHKG1,RABGEF1,BAZ1B,CHST12,ZC3HAV1,AGK,EIF2AK3,RMND5A,PDZRN3,TRNT1,PRMT8,AKAP13,SBK1,SETD1A,KAT8,INSR,CSGALNACT1,LARGE1,MYLK3,GOT2,GCNT…
GO:MF	PDZ domain binding	GO:0030165	0.000115852	3.9361	115	1493	23	25412	ACVR2A,LRP2,FZD1,CFTR,EXOC4,GRM7,KIRREL3,CADM1,ATP2B1,GRIA1,SHISA6,ERC2,SNTB1,SHISA9,CRIPT,CASK,GRID2,ERC1,CACNG3,GRIK2,GJA1,MPP3,DOCK4
GO:MF	protein kinase activity	GO:0004672	0.000139614	3.85507	594	1493	67	25412	STK17B,ERBB4,EPHA4,RPS6KC1,MYO3A,ACVR2A,SRC,ALPK1,MUP5,CDK6,CDK14,PRKAG2,STK32B,TEC,EPHA5,PHKG1,BAZ1B,EIF2AK3,AKAP13,SBK1,INSR,MYLK3,ULK4,MAP3K5,FRK,BCR,ADCK1,MAK,PLK2,CSNK1E,TWF1,PRKDC,PDPK1,STK32A,CASK,TAF1,NRK,AKT3,CDC42BPA,STRADB,BMPR2,SPEG,MARK1,BMPR1B,LYN,CHEK2,GRK3,MET,PRKCB,BCKDK,MAPKAPK3,ERBB3,TAOK1,STRADA,VRK1,MARK3,NTRK2,DAPK1,CCNH,EPHA6,PRKCE,CSNK1G3,PRKCA,MAST4,EEF2K,ERN2,CDC42BPB
GO:MF	cytoskeletal protein binding	GO:0008092	0.000157952	3.80147	1003	1493	99	25412	TNS1,ARPC2,VIL1,MSRB2,MYO3A,XIRP2,GNAS,ATP1A1,MYOZ2,ANK2,TTLL7,SGIP1,AGBL4,CRMP1,LIMCH1,CAPZA2,RAB11FIP5,ALMS1,MAGI1,AGBL1,ANXA2,MYO6,SYNE1,WASF1,ANK3,ADORA2A,RTCB,PAWR,NAV3,KIF5A,GRIA1,MYH13,BCAS3,DAAM1,SIPA1L1,DNAL1,NKD2,ADGRV1,DIAPH3,KLHL1,SNTB1,TWF1,FMNL3,EFCAB1,EZR,DAAM2,KIF6,EPB41L3,CRIPT,DPYSL3,JAKMIP2,ABLIM3,MYO5B,ADD3,SMC3,UXT,FGF13,DCX,TRPC5,CAP1,SLC4A1,TTLL4,KLHL20,KIF26B,USH2A,DSTN,ST…
GO:MF	enzyme binding	GO:0019899	0.000224282	3.64921	2265	1493	189	25412	MOB4,SATB2,ARPC2,USP37,DNAJB2,SLC4A3,EPHA4,CAB39,MDM4,PLA2G4A,DUSP10,DNAJC10,SPG11,SRC,EEF1A2,PIP5K1A,ANXA9,ENSA,CD160,PDE4DIP,NOTCH2,CD2,ATP1A1,ANK2,KDM4C,SH3GL2,KHDRBS1,ANKIB1,PRKAG2,PHKG1,RABGEF1,CFTR,EXOC4,ZC3HAV1,EIF2AK3,RAB11FIP5,VWF,PRMT8,PHLDB3,AKAP13,XPO6,STX1B,KAT8,GLRX3,TCERG1L,INSR,GOT2,CASP12,ANXA2,SYNE1,SASH1,CITED2,TNFAIP3,MAP3K5,AKAP7,WASF1,UBE2D1,BCR,ADORA2A,CRY1,FBXO7,PAWR,HMGA2…
GO:MF	transferase activity, transferring phosphorus-containing groups	GO:0016772	0.000637551	3.19548	928	1493	91	25412	STK17B,ERBB4,EPHA4,RPS6KC1,PIP4K2A,MYO3A,ACVR2A,CERKL,SRC,PMVK,PI4KB,PIP5K1A,ALPK1,MUP5,EIF2B3,CDK6,CDK14,PRKAG2,SELENOI,STK32B,TEC,EPHA5,PHKG1,BAZ1B,AGK,EIF2AK3,TRNT1,AKAP13,SBK1,INSR,MYLK3,ULK4,MAP3K5,FRK,IPMK,BCR,POLR3B,CMPK2,ADCK1,MAK,PTDSS1,PLK2,FHIT,CSNK1E,TWF1,PRKDC,PDPK1,STK32A,PIP5K1B,CASK,TAF1,NRK,AKT3,CDC42BPA,STRADB,BMPR2,SPEG,MARK1,BMPR1B,LYN,CHEK2,GRK3,MVK,GIT2,MET,TPK1,POLR3E,PRKCB…
GO:MF	protein domain specific binding	GO:0019904	0.00261333	2.58281	814	1493	80	25412	EPHA4,PROX1,ACVR2A,LRP2,NFE2L2,SRC,GNAS,GJA5,ATP1A1,SGIP1,KHDRBS1,FZD1,SRP72,CFTR,EXOC4,GRM7,ETV6,STX1B,DOCK1,INSR,SORBS2,CNOT1,KIRREL3,CADM1,CITED2,MAP3K5,AKAP7,CCDC6,ATP2B1,PAWR,HMGA2,GRIA1,SHISA6,CNTNAP1,ELMO1,ERC2,TRPS1,SNTB1,PPARA,SHISA9,PRKDC,ROBO1,APP,EZR,CRIPT,DPYSL3,MBD2,CASK,PLXNB3,ARHGAP6,DLGAP4,RAP2B,CABP1,LYN,GRID2,ERC1,SCNN1B,CACNG3,ARHGAP17,GRIK2,GJA1,CABIN1,CRK,RPH3AL,MPP3,DOCK4,M…
GO:MF	protein serine/threonine kinase activity	GO:0004674	0.0032765	2.48459	438	1493	50	25412	STK17B,RPS6KC1,ACVR2A,ALPK1,CDK6,CDK14,PRKAG2,STK32B,PHKG1,EIF2AK3,AKAP13,SBK1,MYLK3,ULK4,MAP3K5,BCR,ADCK1,MAK,PLK2,CSNK1E,PRKDC,PDPK1,STK32A,CASK,TAF1,NRK,AKT3,CDC42BPA,BMPR2,SPEG,MARK1,BMPR1B,CHEK2,GRK3,PRKCB,BCKDK,MAPKAPK3,TAOK1,STRADA,VRK1,MARK3,DAPK1,CCNH,PRKCE,CSNK1G3,PRKCA,MAST4,EEF2K,ERN2,CDC42BPB
GO:MF	protein serine/threonine/tyrosine kinase activity	GO:0004712	0.00424867	2.37175	430	1493	49	25412	STK17B,ERBB4,EPHA4,RPS6KC1,SRC,CDK6,CDK14,STK32B,TEC,EPHA5,PHKG1,BAZ1B,SBK1,INSR,ULK4,MAP3K5,FRK,BCR,MAK,PLK2,CSNK1E,PRKDC,PDPK1,STK32A,CASK,TAF1,NRK,AKT3,CDC42BPA,SPEG,MARK1,LYN,CHEK2,MET,PRKCB,MAPKAPK3,ERBB3,TAOK1,VRK1,MARK3,NTRK2,DAPK1,EPHA6,PRKCE,CSNK1G3,PRKCA,MAST4,ERN2,CDC42BPB
GO:MF	actin binding	GO:0003779	0.0134792	1.87034	449	1493	49	25412	TNS1,ARPC2,VIL1,MSRB2,MYO3A,XIRP2,MYOZ2,LIMCH1,CAPZA2,MYO6,SYNE1,WASF1,PAWR,MYH13,DAAM1,SIPA1L1,DIAPH3,KLHL1,SNTB1,TWF1,FMNL3,EZR,DAAM2,EPB41L3,ABLIM3,MYO5B,ADD3,TRPC5,CAP1,SLC4A1,KLHL20,DSTN,PFN2,MACF1,MYO18B,SSH1,MYO1H,ANLN,CTNNA3,SPTBN1,SYNE3,IQGAP2,NCALD,PRKCE,PLS3,SPTA1,ENAH,CXCR4,CORO7
GO:BP	system development	GO:0048731	4.3453e-39	38.362	4533	1508	455	27543	EYA1,HECW2,PGAP1,SATB2,CRYGF,CPS1,ERBB4,ATIC,IGFBP5,CXCR2,EPHA4,DNER,MDM4,CRB1,BRINP3,PLA2G4A,ASTN1,OLFR16,RGS7,DUSP10,PROX1,IL2RA,PIP4K2A,ETL4,ACVR2A,XIRP2,LRP2,NFE2L2,ITGA4,NEUROD1,FRZB,ZFP804A,RASGRP1,SPG11,JAG1,BTBD3,MACROD2,SRC,PREX1,DOK5,GNAS,CTSZ,EDN3,CYP7B1,BBS7,FAT4,SLC7A11,TIPARP,UBE2Q1,PGLYRP4,PGLYRP3,ARNT,CTSK,CD160,GJA5,NOTCH2,HSD3B1,WARS2,TBX15,IGSF3,COL11A1,OLFM3,PLPPR5,PTBP2,UGT8A…
GO:BP	anatomical structure development	GO:0048856	5.67105e-38	37.2463	6186	1508	563	27543	EYA1,JPH1,TMEFF2,HECW2,PGAP1,SATB2,CRYGF,CPS1,ERBB4,ATIC,IGFBP5,CXCR2,ARPC2,VIL1,EPHA4,DNER,MDM4,CRB1,BRINP3,PLA2G4A,ASTN1,OLFR16,RGS7,DUSP10,PROX1,LAMB3,IL2RA,PIP4K2A,ETL4,ACVR2A,XIRP2,LRP2,NFE2L2,ITGA4,NEUROD1,FRZB,ZFP804A,RASGRP1,SPG11,JAG1,BTBD3,MACROD2,SRC,DHX35,PREX1,DOK5,GNAS,CTSZ,EDN3,YTHDF3,CYP7B1,BBS7,FAT4,SLC7A11,TIPARP,UBE2Q1,CHTOP,PGLYRP4,PGLYRP3,SPRR2B,SPRR4,LCE1A2,LCE1H,LCE1K,LCE1L…
GO:BP	multicellular organism development	GO:0007275	1.46276e-37	36.8348	5045	1508	486	27543	EYA1,HECW2,PGAP1,SATB2,CRYGF,CPS1,ERBB4,ATIC,IGFBP5,CXCR2,EPHA4,DNER,MDM4,CRB1,BRINP3,PLA2G4A,ASTN1,OLFR16,RGS7,DUSP10,PROX1,LAMB3,IL2RA,PIP4K2A,ETL4,ACVR2A,XIRP2,LRP2,NFE2L2,ITGA4,NEUROD1,FRZB,ZFP804A,RASGRP1,SPG11,JAG1,BTBD3,MACROD2,SRC,DHX35,PREX1,DOK5,GNAS,CTSZ,EDN3,YTHDF3,CYP7B1,BBS7,FAT4,SLC7A11,TIPARP,UBE2Q1,CHTOP,PGLYRP4,PGLYRP3,ARNT,CTSK,OTUD7B,CD160,GJA5,NOTCH2,HSD3B1,WARS2,TBX15,IGSF3,…
GO:BP	developmental process	GO:0032502	1.66449e-34	33.7787	6788	1508	591	27543	EYA1,JPH1,TMEFF2,HECW2,PGAP1,BOLL,SATB2,CRYGF,CPS1,ERBB4,ATIC,IGFBP5,CXCR2,ARPC2,VIL1,EPHA4,DNER,MDM4,CRB1,BRINP3,PLA2G4A,ASTN1,OLFR16,RGS7,DUSP10,PROX1,LAMB3,IL2RA,PIP4K2A,ETL4,ACVR2A,XIRP2,LRP2,NFE2L2,ITGA4,NEUROD1,FRZB,ZFP804A,RASGRP1,SPG11,JAG1,BTBD3,MACROD2,SRC,DHX35,PREX1,DOK5,GNAS,CTSZ,EDN3,YTHDF3,CYP7B1,BBS7,FAT4,SLC7A11,TIPARP,UBE2Q1,CHTOP,PGLYRP4,PGLYRP3,SPRR2B,SPRR4,LCE1A2,LCE1H,LCE1K,…
GO:BP	nervous system development	GO:0007399	1.98644e-32	31.7019	2479	1508	287	27543	EYA1,HECW2,PGAP1,SATB2,ERBB4,ATIC,CXCR2,EPHA4,DNER,CRB1,BRINP3,ASTN1,RGS7,DUSP10,PROX1,LRP2,NFE2L2,ITGA4,NEUROD1,ZFP804A,SPG11,JAG1,BTBD3,MACROD2,SRC,DOK5,CTSZ,EDN3,BBS7,FAT4,SLC7A11,NOTCH2,HSD3B1,OLFM3,PLPPR5,PTBP2,UGT8A,ANK2,LMO4,ASTN2,KDM4C,SH3GL2,SSBP3,AGBL4,EIF2B3,NCDN,CDK6,FZD1,SEMA3D,HGF,HTR5A,CRMP1,GABRA2,FRYL,ADGRL3,EPHA5,ADGRD1,AUTS2,EXOC4,LRRTM4,ALMS1,LRIG1,CNTN3,GRM7,NTF3,ETV6,SOX5,TE…
GO:BP	biological regulation	GO:0065007	2.08073e-24	23.6818	14043	1508	973	27543	OPRK1,ST18,EYA1,TMEFF2,STK17B,HECW2,PGAP1,SF3B1,BOLL,PLCL1,HSFY2,SATB2,CPS1,ERBB4,IGFBP5,CXCR2,CXCR1,ARPC2,VIL1,USP37,ZFP142,DNAJB2,SLC4A3,EPHA4,DNER,CAB39,DPP10,SLC41A1,MDM4,CRB1,BRINP3,PLA2G4A,SEC16B,OLFR16,RGS7,DUSP10,PROX1,ANGEL2,DTL,IL2RA,MALRD1,PIP4K2A,GPR158,OLFR342,ACVR2A,KCNJ3,KCNH7,LRP2,NFE2L2,OSBPL6,UBE2E3,ITGA4,CERKL,NEUROD1,PPP1R1C,PDE1A,DNAJC10,FRZB,NUP35,ZFP804A,TFPI,HSD17B12,RASGR…
GO:BP	animal organ development	GO:0048513	1.99627e-23	22.6998	3856	1508	362	27543	EYA1,JPH1,TMEFF2,PGAP1,SATB2,CRYGF,CPS1,ERBB4,ATIC,IGFBP5,CXCR2,EPHA4,DNER,MDM4,CRB1,PLA2G4A,RGS7,DUSP10,PROX1,LAMB3,IL2RA,PIP4K2A,ACVR2A,XIRP2,LRP2,NFE2L2,NEUROD1,FRZB,RASGRP1,SPG11,JAG1,BTBD3,MACROD2,SRC,PREX1,GNAS,CTSZ,EDN3,CYP7B1,BBS7,FAT4,SLC7A11,TIPARP,PGLYRP4,PGLYRP3,SPRR2B,SPRR4,LCE1A2,LCE1H,LCE1K,LCE1L,TUFT1,ARNT,CTSK,GJA5,BCL9,NOTCH2,HSD3B1,TBX15,IGSF3,COL11A1,OLFM3,PTBP2,MYOZ2,ANK2,LMO…
GO:BP	anatomical structure morphogenesis	GO:0009653	4.11782e-23	22.3853	2781	1508	285	27543	EYA1,TMEFF2,HECW2,SATB2,ERBB4,IGFBP5,CXCR2,ARPC2,VIL1,EPHA4,MDM4,CRB1,OLFR16,PROX1,LAMB3,ACVR2A,XIRP2,LRP2,NFE2L2,ITGA4,NEUROD1,FRZB,SPG11,JAG1,BTBD3,SRC,PREX1,GNAS,CTSZ,EDN3,CYP7B1,FAT4,TIPARP,CD160,GJA5,NOTCH2,WARS2,TBX15,COL11A1,OLFM3,MYOZ2,UGT8A,ANK2,LMO4,MMP16,MUP5,ASTN2,KDM4C,SH3GL2,SSBP3,GJB5,FZD1,SEMA3D,HGF,CRMP1,FRYL,EPHA5,ENAM,AUTS2,CFTR,EXOC4,EIF2AK3,FOXI3,ALMS1,LRIG1,NTF3,SOX5,AKAP13,…
GO:BP	regulation of biological process	GO:0050789	5.60342e-22	21.2515	13329	1508	925	27543	OPRK1,ST18,EYA1,TMEFF2,STK17B,HECW2,PGAP1,SF3B1,BOLL,PLCL1,HSFY2,SATB2,ERBB4,IGFBP5,CXCR2,CXCR1,ARPC2,VIL1,USP37,ZFP142,DNAJB2,SLC4A3,EPHA4,DNER,CAB39,DPP10,MDM4,BRINP3,PLA2G4A,SEC16B,OLFR16,RGS7,DUSP10,PROX1,ANGEL2,DTL,IL2RA,MALRD1,PIP4K2A,GPR158,OLFR342,ACVR2A,KCNJ3,KCNH7,LRP2,NFE2L2,OSBPL6,UBE2E3,ITGA4,CERKL,NEUROD1,PPP1R1C,PDE1A,DNAJC10,FRZB,NUP35,ZFP804A,TFPI,HSD17B12,RASGRP1,SPG11,JAG1,SRC,…
GO:BP	localization	GO:0051179	9.03829e-22	21.0439	6297	1508	516	27543	OPRK1,TMEFF2,HECW2,PGAP1,RFTN2,SATB2,ERBB4,IGFBP5,TNS1,CXCR2,CXCR1,ARPC2,VIL1,DNAJB2,SLC4A3,EPHA4,DPP10,SLC41A1,CRB1,PLA2G4A,SEC16B,ASTN1,RGS7,DUSP10,PROX1,LAMB3,PIP4K2A,GPR158,KCNT1,ACVR2A,KCNJ3,KCNH7,LRP2,MTX2,NFE2L2,TTC30A1,OSBPL6,ITGA4,NEUROD1,NUP35,RASGRP1,SPG11,JAG1,SRC,PREX1,GNAS,ATP5E,EDN3,YTHDF3,CYP7B1,ARMC1,BBS7,SLC7A11,KCNN3,UBE2Q1,CHTOP,PIP5K1A,ANXA9,ENSA,VPS45,OTUD7B,FCGR1,CD160,GJA5…
GO:BP	regulation of cellular process	GO:0050794	1.04108e-21	20.9825	12487	1508	878	27543	OPRK1,ST18,EYA1,TMEFF2,STK17B,HECW2,PGAP1,SF3B1,BOLL,PLCL1,HSFY2,SATB2,ERBB4,IGFBP5,CXCR2,CXCR1,ARPC2,VIL1,USP37,ZFP142,DNAJB2,EPHA4,DNER,CAB39,DPP10,MDM4,BRINP3,PLA2G4A,SEC16B,OLFR16,RGS7,DUSP10,PROX1,ANGEL2,DTL,IL2RA,MALRD1,PIP4K2A,GPR158,OLFR342,ACVR2A,KCNJ3,KCNH7,LRP2,NFE2L2,ITGA4,CERKL,NEUROD1,PPP1R1C,PDE1A,DNAJC10,FRZB,NUP35,ZFP804A,TFPI,HSD17B12,RASGRP1,SPG11,JAG1,SRC,PREX1,DOK5,GNAS,NELFC…
GO:BP	multicellular organismal process	GO:0032501	5.66855e-21	20.2465	8766	1508	663	27543	OPRK1,EYA1,HECW2,PGAP1,BOLL,PLCL1,SATB2,CRYGF,CPS1,ERBB4,ATIC,IGFBP5,CXCR2,VIL1,SLC4A3,EPHA4,DNER,SPP2,MDM4,CRB1,BRINP3,PLA2G4A,ASTN1,OLFR16,RGS7,DUSP10,PROX1,LAMB3,IL2RA,PIP4K2A,ETL4,MYO3A,OLFR342,ACVR2A,XIRP2,LRP2,NFE2L2,ITGA4,NEUROD1,FRZB,ZFP804A,TFPI,RASGRP1,SPG11,JAG1,BTBD3,MACROD2,SRC,DHX35,PREX1,DOK5,GNAS,CTSZ,EDN3,YTHDF3,CYP7B1,BBS7,FAT4,SLC7A11,TIPARP,UBE2Q1,CHTOP,PGLYRP4,PGLYRP3,SPRR2B,…
GO:BP	cell differentiation	GO:0030154	1.91094e-20	19.7188	4646	1508	405	27543	EYA1,TMEFF2,HECW2,BOLL,SATB2,CPS1,ERBB4,IGFBP5,ARPC2,VIL1,EPHA4,DNER,CRB1,BRINP3,ASTN1,OLFR16,DUSP10,PROX1,LAMB3,IL2RA,PIP4K2A,ACVR2A,LRP2,NFE2L2,ITGA4,NEUROD1,FRZB,ZFP804A,RASGRP1,SPG11,JAG1,BTBD3,SRC,PREX1,DOK5,GNAS,CTSZ,EDN3,BBS7,FAT4,SLC7A11,TIPARP,PGLYRP4,PGLYRP3,SPRR2B,SPRR4,LCE1A2,LCE1H,LCE1K,LCE1L,ARNT,BCL9,NOTCH2,WARS2,TBX15,COL11A1,OLFM3,PLPPR5,MYOZ2,UGT8A,ANK2,LMO4,WWP1,ASTN2,KDM4C,SH3…
GO:BP	cellular developmental process	GO:0048869	3.86488e-20	19.4129	4678	1508	406	27543	EYA1,TMEFF2,HECW2,BOLL,SATB2,CPS1,ERBB4,IGFBP5,ARPC2,VIL1,EPHA4,DNER,CRB1,BRINP3,ASTN1,OLFR16,DUSP10,PROX1,LAMB3,IL2RA,PIP4K2A,ACVR2A,LRP2,NFE2L2,ITGA4,NEUROD1,FRZB,ZFP804A,RASGRP1,SPG11,JAG1,BTBD3,SRC,PREX1,DOK5,GNAS,CTSZ,EDN3,BBS7,FAT4,SLC7A11,TIPARP,PGLYRP4,PGLYRP3,SPRR2B,SPRR4,LCE1A2,LCE1H,LCE1K,LCE1L,ARNT,BCL9,NOTCH2,WARS2,TBX15,COL11A1,OLFM3,PLPPR5,MYOZ2,UGT8A,ANK2,LMO4,WWP1,MUP5,ASTN2,KDM4…
GO:BP	regulation of biological quality	GO:0065008	1.28061e-19	18.8926	4029	1508	361	27543	OPRK1,BOLL,PLCL1,CPS1,ERBB4,IGFBP5,CXCR2,CXCR1,ARPC2,VIL1,SLC4A3,EPHA4,SLC41A1,MDM4,CRB1,PLA2G4A,OLFR16,RGS7,ANGEL2,IL2RA,MALRD1,ACVR2A,KCNH7,LRP2,NFE2L2,NEUROD1,ZFP804A,TFPI,HSD17B12,SPG11,SRC,GNAS,EDN3,YTHDF3,CYP7B1,SLC7A11,TIPARP,UBE2Q1,UBAP2L,ARNT,CTSK,ENSA,GJA5,HSD3B1,ATP1A1,ANK2,MUP5,SH3GL2,SLC24A2,SGIP1,NCDN,CDK6,AKAP9,FZD1,STEAP1,SEMA3D,DPP6,GABRA2,TEC,ADGRL3,EPHA5,TMEM175,SLC15A4,CAPZA2,…
GO:BP	neurogenesis	GO:0022008	3.82275e-19	18.4176	1822	1508	202	27543	EYA1,HECW2,SATB2,ERBB4,EPHA4,DNER,CRB1,BRINP3,ASTN1,DUSP10,PROX1,LRP2,NFE2L2,ITGA4,NEUROD1,ZFP804A,SPG11,JAG1,BTBD3,DOK5,CTSZ,EDN3,FAT4,OLFM3,PLPPR5,UGT8A,LMO4,ASTN2,KDM4C,SH3GL2,AGBL4,EIF2B3,NCDN,CDK6,FZD1,SEMA3D,HGF,CRMP1,FRYL,ADGRL3,EPHA5,ADGRD1,AUTS2,EXOC4,ALMS1,GRM7,NTF3,ETV6,SOX5,TENM4,STX1B,CLN8,UNC5D,TENM3,EDNRA,CNTN5,FAT3,NTM,KIRREL3,LINGO1,RORA,ANXA2,TPBG,ULK4,OLIG3,LAMA2,WASF1,ANK3,PCD…
GO:BP	regulation of multicellular organismal process	GO:0051239	4.58146e-19	18.339	2854	1508	278	27543	OPRK1,PLCL1,ERBB4,IGFBP5,CXCR2,VIL1,SLC4A3,EPHA4,MDM4,OLFR16,DUSP10,PROX1,IL2RA,ACVR2A,LRP2,NFE2L2,NEUROD1,FRZB,TFPI,RASGRP1,JAG1,SRC,GNAS,EDN3,FAT4,PGLYRP4,PGLYRP3,ARNT,CTSK,OTUD7B,FCGR1,CD160,GJA5,NOTCH2,WARS2,CD2,ATP1A1,ANK2,SGIP1,CDK6,AKAP9,SEMA3D,HGF,CLNK,ADGRL3,ENAM,RABGEF1,CFTR,ZC3HAV1,EIF2AK3,LRRTM4,RAB11FIP5,ALMS1,LMCD1,VGLL4,CLEC4N,NTF3,SOX5,PGLYRP1,PRCP,TENM4,SETD1A,STX1B,VKORC1,DOCK1,…
GO:BP	positive regulation of biological process	GO:0048518	7.45243e-18	17.1277	6629	1508	521	27543	OPRK1,ST18,EYA1,STK17B,HECW2,PGAP1,SF3B1,BOLL,SATB2,ERBB4,IGFBP5,CXCR2,ARPC2,VIL1,ZFP142,DNAJB2,EPHA4,CAB39,DPP10,MDM4,BRINP3,PLA2G4A,SEC16B,RGS7,DUSP10,PROX1,ANGEL2,DTL,IL2RA,PIP4K2A,ACVR2A,LRP2,NFE2L2,ITGA4,NEUROD1,FRZB,ZFP804A,HSD17B12,RASGRP1,JAG1,SRC,PREX1,DOK5,GNAS,CTSZ,EDN3,EEF1A2,YTHDF3,CYP7B1,BBS7,MAML3,TIPARP,CHTOP,ARNT,SF3B4,FCGR1,CD160,GJA5,BCL9,PDE4DIP,SEC22B,NOTCH2,WARS2,CD2,ATP1A1,…
GO:BP	generation of neurons	GO:0048699	5.25346e-17	16.2796	1587	1508	178	27543	EYA1,HECW2,SATB2,ERBB4,EPHA4,CRB1,BRINP3,ASTN1,PROX1,LRP2,NFE2L2,ITGA4,NEUROD1,ZFP804A,SPG11,JAG1,BTBD3,DOK5,CTSZ,EDN3,FAT4,OLFM3,PLPPR5,UGT8A,LMO4,ASTN2,KDM4C,SH3GL2,AGBL4,NCDN,FZD1,SEMA3D,HGF,CRMP1,FRYL,ADGRL3,EPHA5,AUTS2,ALMS1,GRM7,NTF3,SOX5,TENM4,STX1B,CLN8,UNC5D,TENM3,EDNRA,CNTN5,FAT3,NTM,KIRREL3,LINGO1,RORA,TPBG,ULK4,OLIG3,LAMA2,WASF1,ANK3,PCDH15,ADORA2A,FBXO7,RAB21,GRIP1,KIF5A,EIF4ENIF1,SL…
GO:BP	neuron differentiation	GO:0030182	1.592e-16	15.7981	1514	1508	171	27543	EYA1,HECW2,SATB2,ERBB4,EPHA4,CRB1,BRINP3,PROX1,LRP2,NFE2L2,ITGA4,NEUROD1,ZFP804A,SPG11,JAG1,BTBD3,DOK5,CTSZ,EDN3,FAT4,OLFM3,PLPPR5,UGT8A,LMO4,KDM4C,SH3GL2,AGBL4,NCDN,FZD1,SEMA3D,HGF,CRMP1,FRYL,EPHA5,AUTS2,ALMS1,GRM7,NTF3,SOX5,TENM4,STX1B,CLN8,UNC5D,TENM3,EDNRA,CNTN5,FAT3,NTM,KIRREL3,LINGO1,RORA,TPBG,ULK4,OLIG3,LAMA2,WASF1,ANK3,PCDH15,ADORA2A,FBXO7,RAB21,GRIP1,KIF5A,EIF4ENIF1,SLIT3,CNTNAP1,MYT1L,E…
GO:BP	tissue development	GO:0009888	1.10262e-15	14.9576	2046	1508	209	27543	EYA1,TMEFF2,SATB2,CPS1,ERBB4,IGFBP5,CXCR2,VIL1,EPHA4,DNER,MDM4,PLA2G4A,DUSP10,PROX1,LAMB3,ACVR2A,XIRP2,LRP2,ITGA4,NEUROD1,FRZB,SPG11,JAG1,SRC,GNAS,CTSZ,EDN3,CYP7B1,FAT4,SLC7A11,TIPARP,SPRR2B,SPRR4,LCE1A2,LCE1H,LCE1K,LCE1L,TUFT1,CTSK,GJA5,BCL9,NOTCH2,COL11A1,MYOZ2,LMO4,ASTN2,BNC2,SSBP3,GJB5,CDK6,FZD1,SEMA3D,HGF,ENAM,CFTR,EXOC4,ALMS1,VGLL4,NTF3,SOX5,AKAP13,TENM4,INSR,SORBS2,CSGALNACT1,EDNRA,MYLK3,S…
GO:BP	positive regulation of cellular process	GO:0048522	3.63726e-15	14.4392	6072	1508	475	27543	OPRK1,ST18,EYA1,STK17B,PGAP1,SF3B1,BOLL,SATB2,ERBB4,IGFBP5,CXCR2,ARPC2,VIL1,ZFP142,DNAJB2,EPHA4,CAB39,DPP10,MDM4,BRINP3,PLA2G4A,SEC16B,RGS7,DUSP10,PROX1,DTL,IL2RA,PIP4K2A,ACVR2A,LRP2,NFE2L2,ITGA4,NEUROD1,FRZB,ZFP804A,HSD17B12,RASGRP1,JAG1,SRC,PREX1,DOK5,GNAS,CTSZ,EDN3,EEF1A2,YTHDF3,CYP7B1,BBS7,MAML3,CHTOP,ARNT,SF3B4,FCGR1,CD160,GJA5,BCL9,PDE4DIP,NOTCH2,PLPPR5,SNX7,ANK2,ALPK1,LMO4,MUP5,KDM4C,SH3GL…
GO:BP	establishment of localization	GO:0051234	7.56308e-15	14.1213	4762	1508	391	27543	OPRK1,HECW2,PGAP1,RFTN2,ERBB4,CXCR2,CXCR1,ARPC2,VIL1,SLC4A3,SLC41A1,PLA2G4A,SEC16B,RGS7,PIP4K2A,KCNT1,ACVR2A,KCNJ3,KCNH7,LRP2,MTX2,NFE2L2,TTC30A1,OSBPL6,ITGA4,NEUROD1,NUP35,RASGRP1,SPG11,SRC,GNAS,ATP5E,EDN3,BBS7,SLC7A11,KCNN3,UBE2Q1,CHTOP,ANXA9,ENSA,VPS45,FCGR1,CD160,GJA5,SEC22B,SPAG17,ATP1A1,SNX7,ANK2,CNGB3,SLC7A13,MUP5,ASTN2,SH3GL2,SLC24A2,SGIP1,OSBPL9,AGBL4,GJB5,TXLNA,KHDRBS1,PEX1,AKAP9,STEAP1…
GO:BP	cell adhesion	GO:0007155	2.22856e-14	13.652	1422	1508	158	27543	TMEFF2,ARPC2,EPHA4,CRB1,HMCN1,ASTN1,DUSP10,LAMB3,IL2RA,ITGA4,HSD17B12,RASGRP1,JAG1,SRC,PREX1,GNAS,CDH26,FAT4,SLC7A11,PIP5K1A,ANXA9,CD160,CD2,ASTN2,CDK6,LIMCH1,ADGRL3,EPHA5,SLC7A1,MMRN1,FBLN2,MAGI1,CNTN3,VWF,LYPD3,TENM4,DOCK1,UNC5D,CNTNAP4,CNTN5,FAT3,NTM,KIRREL3,CADM1,ITGA9,CITED2,PERP,TNFAIP3,ARG1,LAMA2,ANK3,PCDH15,BCR,ADORA2A,PAWR,BCAS3,CNTNAP1,NRXN3,FLRT2,DSP,GCNT2,ADGRV1,PDE4D,ZMIZ1,PCDH17,PCD…
GO:BP	cell development	GO:0048468	5.58856e-14	13.2527	2426	1508	231	27543	TMEFF2,HECW2,SATB2,ERBB4,ARPC2,EPHA4,DNER,CRB1,DUSP10,PROX1,LAMB3,PIP4K2A,LRP2,NFE2L2,ITGA4,NEUROD1,FRZB,ZFP804A,SPG11,JAG1,BTBD3,SRC,PREX1,CTSZ,EDN3,FAT4,NOTCH2,COL11A1,OLFM3,PLPPR5,MYOZ2,UGT8A,ANK2,SH3GL2,AGBL4,EIF2B3,NCDN,CDK6,FZD1,CFAP69,SEMA3D,HGF,CRMP1,FRYL,EPHA5,HFM1,AUTS2,CFTR,NOBOX,ALMS1,GRM7,NTF3,AKAP13,TENM4,STX1B,DOCK1,UNC5D,SORBS2,TENM3,EDNRA,MYLK3,CNTN5,FAT3,NTM,KIRREL3,LINGO1,ANXA2…
GO:BP	regulation of cell communication	GO:0010646	8.4679e-14	13.0722	3453	1508	301	27543	OPRK1,EYA1,PLCL1,ERBB4,IGFBP5,EPHA4,MDM4,RGS7,DUSP10,PROX1,PIP4K2A,ACVR2A,LRP2,NFE2L2,NEUROD1,FRZB,RASGRP1,SPG11,JAG1,SRC,DOK5,GNAS,EDN3,YTHDF3,CYP7B1,SLC7A11,ENSA,OTUD7B,RNF115,CD160,GJA5,NOTCH2,MYOZ2,ANK2,ALPK1,MUP5,RGS3,SLC24A2,NCDN,AKAP9,FZD1,CDK14,HGF,EPHA5,SLC15A4,FZD10,RABGEF1,AUTS2,SLC7A1,MDFIC,CFTR,GRM8,EXOC4,ZC3HAV1,EIF2AK3,RAB11FIP5,GRM7,LMCD1,VGLL4,CLEC4N,VWF,NTF3,AKAP13,PRCP,STX1B,IN…
GO:BP	regulation of localization	GO:0032879	9.29718e-14	13.0316	2881	1508	262	27543	OPRK1,TMEFF2,HECW2,PGAP1,ERBB4,IGFBP5,CXCR2,ARPC2,VIL1,DNAJB2,EPHA4,DPP10,PLA2G4A,SEC16B,RGS7,DUSP10,PROX1,ACVR2A,KCNJ3,KCNH7,LRP2,NFE2L2,OSBPL6,ITGA4,SPG11,JAG1,SRC,GNAS,EDN3,YTHDF3,SLC7A11,ENSA,OTUD7B,FCGR1,CD160,GJA5,ATP1A1,ANK2,LMO4,MUP5,ASTN2,SH3GL2,SGIP1,KHDRBS1,AKAP9,CFAP69,SEMA3D,HGF,DPP6,KCNIP4,LIMCH1,EPHA5,RABGEF1,MDFIC,CFTR,CADPS2,GRM8,EXOC4,RAB11FIP5,CRBN,EDEM1,GRM7,CACNA2D4,NTF3,SERG…
GO:BP	transport	GO:0006810	1.21287e-13	12.9162	4607	1508	376	27543	OPRK1,HECW2,PGAP1,RFTN2,ERBB4,CXCR2,CXCR1,ARPC2,VIL1,SLC4A3,SLC41A1,PLA2G4A,SEC16B,RGS7,PIP4K2A,KCNT1,ACVR2A,KCNJ3,KCNH7,LRP2,MTX2,NFE2L2,TTC30A1,OSBPL6,ITGA4,NEUROD1,NUP35,RASGRP1,SPG11,SRC,GNAS,ATP5E,EDN3,BBS7,SLC7A11,KCNN3,UBE2Q1,CHTOP,ANXA9,ENSA,VPS45,FCGR1,CD160,GJA5,SEC22B,SPAG17,ATP1A1,SNX7,ANK2,CNGB3,SLC7A13,MUP5,ASTN2,SH3GL2,SLC24A2,SGIP1,OSBPL9,AGBL4,GJB5,TXLNA,KHDRBS1,PEX1,AKAP9,STEAP1…
GO:BP	regulation of signaling	GO:0023051	1.26421e-13	12.8982	3463	1508	301	27543	OPRK1,EYA1,PLCL1,ERBB4,IGFBP5,EPHA4,MDM4,RGS7,DUSP10,PROX1,PIP4K2A,ACVR2A,LRP2,NFE2L2,NEUROD1,FRZB,RASGRP1,SPG11,JAG1,SRC,DOK5,GNAS,EDN3,YTHDF3,CYP7B1,SLC7A11,ENSA,OTUD7B,RNF115,CD160,GJA5,NOTCH2,MYOZ2,ANK2,ALPK1,MUP5,RGS3,SLC24A2,NCDN,AKAP9,FZD1,CDK14,HGF,EPHA5,SLC15A4,FZD10,RABGEF1,AUTS2,SLC7A1,MDFIC,CFTR,GRM8,EXOC4,ZC3HAV1,EIF2AK3,RAB11FIP5,GRM7,LMCD1,VGLL4,CLEC4N,VWF,NTF3,AKAP13,PRCP,STX1B,IN…
GO:BP	cell-cell signaling	GO:0007267	3.45914e-13	12.461	1690	1508	175	27543	OPRK1,PLCL1,ERBB4,EPHA4,PLA2G4A,OLFR16,ACVR2A,LRP2,NEUROD1,FRZB,SPG11,SRC,GNAS,EDN3,SLC7A11,UBE2Q1,ANXA9,ENSA,GJA5,BCL9,ANK2,MUP5,SLC24A2,NCDN,GJB5,AKAP9,FZD1,CDK14,HGF,HTR5A,GABRA2,EPHA5,FZD10,RIMBP2,MDFIC,CFTR,CADPS2,GRM8,EXOC4,RAB11FIP5,GRM7,VGLL4,NTF3,STX1B,SYT8,SORBS2,EDNRA,VPS35,ZFP423,SALL1,CNTNAP4,SNX19,CADM1,TLE3,TPBG,TNFAIP3,AKAP7,LAMA2,BICC1,BCR,ADORA2A,CRY1,SYN3,LGR5,HMGA2,GLRA1,GRIA1…
GO:BP	negative regulation of cellular process	GO:0048523	9.16295e-13	12.038	5155	1508	407	27543	OPRK1,ST18,EYA1,TMEFF2,HECW2,BOLL,SATB2,ERBB4,IGFBP5,CXCR2,ARPC2,VIL1,DNAJB2,EPHA4,MDM4,BRINP3,RGS7,DUSP10,PROX1,ANGEL2,DTL,IL2RA,MALRD1,PIP4K2A,LRP2,NFE2L2,CERKL,NEUROD1,DNAJC10,FRZB,TFPI,JAG1,SRC,NELFCD,CTSZ,EDN3,YTHDF3,CYP7B1,SLC7A11,PGLYRP4,PGLYRP3,SETDB1,ENSA,OTUD7B,RNF115,CD160,SEC22B,NOTCH2,TBX15,ATP1A1,PTBP2,MYOZ2,ANK2,LMO4,WWP1,MUP5,RGS3,ASTN2,KDM4C,SH3GL2,SLC24A2,AGBL4,PHC2,KHDRBS1,PRAM…
GO:BP	central nervous system development	GO:0007417	1.6319e-12	11.7873	1031	1508	122	27543	PGAP1,SATB2,ERBB4,ATIC,CXCR2,EPHA4,DNER,RGS7,DUSP10,PROX1,LRP2,NEUROD1,SPG11,BTBD3,MACROD2,SRC,BBS7,FAT4,SLC7A11,NOTCH2,HSD3B1,PTBP2,LMO4,SSBP3,AGBL4,EIF2B3,HTR5A,ADGRL3,EPHA5,EXOC4,NTF3,SOX5,TENM4,SBK1,SETD1A,CLN8,WRN,ZFP423,SALL1,KIRREL3,CADM1,LINGO1,RORA,ULK4,CITED2,OLIG3,BCR,ADORA2A,ATP2B1,HMGA2,CNTNAP1,SIX1,SLC6A3,RARB,ZMIZ1,KLHL1,DNAH5,TRAPPC9,SLC38A2,FAIM2,PRKDC,B3GNT5,ROBO1,ROBO2,APP,CBS,…
GO:BP	positive regulation of multicellular organismal process	GO:0051240	3.12269e-12	11.5055	1595	1508	165	27543	OPRK1,ERBB4,CXCR2,VIL1,EPHA4,DUSP10,PROX1,IL2RA,ACVR2A,LRP2,NFE2L2,RASGRP1,JAG1,SRC,GNAS,EDN3,ARNT,FCGR1,CD160,GJA5,NOTCH2,WARS2,CD2,ATP1A1,SGIP1,HGF,CLNK,ADGRL3,ENAM,CFTR,ZC3HAV1,EIF2AK3,LRRTM4,ALMS1,CLEC4N,NTF3,SOX5,TENM4,VKORC1,EDNRA,VPS35,CADM1,RORA,ANXA2,TPBG,SASH1,CITED2,ADORA2A,POLR3B,ATP2B1,PAWR,RAB21,HMGA2,SIX1,TMED10,FLRT2,PRL7B1,GCNT2,SLC6A3,ADGRV1,PDE4D,ZMIZ1,GATA4,CPB2,SLITRK1,SLITRK…
GO:BP	neuron development	GO:0048666	6.91532e-12	11.1602	1241	1508	137	27543	HECW2,EPHA4,CRB1,LRP2,NFE2L2,ITGA4,NEUROD1,ZFP804A,SPG11,BTBD3,CTSZ,EDN3,FAT4,OLFM3,PLPPR5,UGT8A,SH3GL2,AGBL4,NCDN,FZD1,SEMA3D,HGF,CRMP1,FRYL,EPHA5,AUTS2,ALMS1,GRM7,NTF3,TENM4,STX1B,UNC5D,TENM3,EDNRA,CNTN5,FAT3,NTM,KIRREL3,LINGO1,TPBG,ULK4,LAMA2,WASF1,ANK3,PCDH15,ADORA2A,FBXO7,RAB21,GRIP1,KIF5A,SLIT3,CNTNAP1,MYT1L,ETV1,SIPA1L1,FLRT2,HECW1,ADGRV1,PLK2,ZMIZ1,KLHL1,SLITRK1,SLITRK6,TWF1,UBE2V2,ALCAM,…
GO:BP	cell junction organization	GO:0034330	7.42908e-12	11.1291	750	1508	97	27543	ERBB4,TNS1,EPHA4,XIRP2,ZFP804A,SPG11,SRC,SLC7A11,PIP5K1A,GJA5,UGT8A,ANK2,FZD1,LIMCH1,GABRA2,ADGRL3,EPHA5,LRRTM4,PDZRN3,PPFIBP1,INSR,SORBS2,VPS35,CNTNAP4,CNTN5,KIRREL3,CADM1,TPBG,PERP,WASF1,ANK3,BCR,SHISA6,BCAS3,CNTNAP1,SIX1,SIPA1L1,NRXN3,FLRT2,DSP,HTR1A,ERC2,PCDH17,SLITRK1,SLITRK6,CDH10,CDH12,UBE2V2,ETV5,APP,PDPK1,LRFN2,EPB41L3,CRIPT,CBLN2,CASK,FGF13,CHRDL1,FRMPD4,ARHGAP6,CABP1,CDH20,PKP4,SYNDIG1…
GO:BP	regulation of developmental process	GO:0050793	1.63011e-11	10.7878	2652	1508	238	27543	EYA1,HECW2,ERBB4,IGFBP5,CXCR2,ARPC2,VIL1,EPHA4,BRINP3,OLFR16,DUSP10,PROX1,IL2RA,ACVR2A,LRP2,NFE2L2,NEUROD1,FRZB,RASGRP1,JAG1,SRC,PREX1,GNAS,EDN3,FAT4,PGLYRP4,PGLYRP3,CTSK,CD160,NOTCH2,WARS2,LMO4,KDM4C,SGIP1,SSBP3,AGBL4,PRAMEL5,CDK6,FZD1,SEMA3D,HGF,ADGRL3,ENAM,CFTR,LRRTM4,ALMS1,VGLL4,NTF3,SOX5,PGLYRP1,TMEM135,TENM4,SETD1A,DOCK1,INSR,EDNRA,INPP4B,VPS35,MYLK3,CNOT1,FAT3,LINGO1,RORA,ANXA2,CD109,TPBG,…
GO:BP	negative regulation of biological process	GO:0048519	7.81431e-11	10.1071	5996	1508	450	27543	OPRK1,ST18,EYA1,TMEFF2,HECW2,BOLL,PLCL1,SATB2,ERBB4,IGFBP5,CXCR2,ARPC2,VIL1,DNAJB2,EPHA4,MDM4,BRINP3,RGS7,DUSP10,PROX1,ANGEL2,DTL,IL2RA,MALRD1,PIP4K2A,LRP2,NFE2L2,CERKL,NEUROD1,DNAJC10,FRZB,TFPI,JAG1,SRC,GNAS,NELFCD,CTSZ,EDN3,YTHDF3,CYP7B1,SLC7A11,TIPARP,PGLYRP4,PGLYRP3,SETDB1,CTSK,ENSA,OTUD7B,RNF115,CD160,GJA5,SEC22B,NOTCH2,TBX15,ATP1A1,PTBP2,MYOZ2,ANK2,LMO4,WWP1,MUP5,RGS3,ASTN2,KDM4C,SH3GL2,SLC…
GO:BP	regulation of signal transduction	GO:0009966	8.36445e-11	10.0776	2898	1508	252	27543	OPRK1,EYA1,ERBB4,IGFBP5,EPHA4,MDM4,RGS7,DUSP10,PROX1,PIP4K2A,ACVR2A,LRP2,NFE2L2,NEUROD1,FRZB,RASGRP1,JAG1,SRC,DOK5,GNAS,EDN3,YTHDF3,CYP7B1,OTUD7B,RNF115,CD160,NOTCH2,MYOZ2,ALPK1,MUP5,RGS3,AKAP9,FZD1,CDK14,HGF,SLC15A4,FZD10,RABGEF1,AUTS2,SLC7A1,MDFIC,EXOC4,ZC3HAV1,EIF2AK3,LMCD1,VGLL4,CLEC4N,VWF,NTF3,AKAP13,PRCP,STX1B,INSR,RBPMS,NR3C2,EDNRA,INPP4B,VPS35,ZFP423,SALL1,CNOT1,PDGFD,TLE3,RORA,CGNL1,CD10…
GO:BP	plasma membrane bounded cell projection organization	GO:0120036	9.11841e-11	10.0401	1589	1508	160	27543	HECW2,ARPC2,VIL1,EPHA4,LRP2,NFE2L2,TTC30A1,ITGA4,ZFP804A,SPG11,BTBD3,SRC,CTSZ,EDN3,BBS7,FAT4,PIP5K1A,SPAG17,PLPPR5,UGT8A,ALPK1,SH3GL2,NCDN,FZD1,CFAP69,SEMA3D,HGF,CRMP1,FRYL,EPHA5,TCHP,AUTS2,ALMS1,GRM7,NTF3,STX1B,INSR,UNC5D,EDNRA,VPS35,ZFP423,CNTN5,FAT3,NTM,KIRREL3,LINGO1,TPBG,ULK4,SYNE1,LAMA2,WASF1,ANK3,PCDH15,ADORA2A,FBXO7,BBS10,RAB21,GRIP1,KIF5A,SLIT3,BCAS3,CNTNAP1,ETV1,SIPA1L1,DNAL1,FLRT2,HECW…
GO:BP	locomotion	GO:0040011	9.3772e-11	10.0279	1892	1508	182	27543	OPRK1,TMEFF2,SATB2,ERBB4,IGFBP5,TNS1,CXCR2,CXCR1,ARPC2,VIL1,EPHA4,ASTN1,OLFR16,DUSP10,PROX1,LAMB3,LRP2,NFE2L2,ITGA4,JAG1,SRC,PREX1,EDN3,YTHDF3,CYP7B1,PIP5K1A,LMO4,ASTN2,CFAP69,SEMA3D,HGF,CRMP1,LIMCH1,ADGRL3,EPHA5,RABGEF1,AUTS2,NTF3,PRCP,DOCK1,INSR,UNC5D,EDNRA,VPS35,PDGFD,CNTN5,FAT3,KIRREL3,CADM1,TPBG,ITGA9,ULK4,SASH1,CITED2,TNFAIP3,OLIG3,ARHGAP18,LAMA2,ANK3,BCR,ADORA2A,FBXO7,PAWR,NAV3,KIF5A,SLIT3…
GO:BP	regulation of primary metabolic process	GO:0080090	9.68771e-11	10.0138	5971	1508	448	27543	ST18,EYA1,HECW2,SF3B1,BOLL,PLCL1,HSFY2,SATB2,ERBB4,IGFBP5,VIL1,USP37,ZFP142,DNAJB2,EPHA4,CAB39,MDM4,PLA2G4A,DUSP10,PROX1,ANGEL2,DTL,MALRD1,PIP4K2A,ACVR2A,NFE2L2,NEUROD1,DNAJC10,NUP35,TFPI,RASGRP1,JAG1,SRC,GNAS,NELFCD,CTSZ,EDN3,ZFP931,EEF1A2,ZFHX4,YTHDF3,BBS7,SLC7A11,MAML3,TIPARP,CHTOP,SETDB1,ARNT,ENSA,OTUD7B,SF3B4,BCL9,SEC22B,NOTCH2,TBX15,ATP1A1,PTBP2,MYOZ2,LMO4,WWP1,ORC3,MUP5,KDM4C,BNC2,SH3GL2,S…
GO:BP	regulation of nitrogen compound metabolic process	GO:0051171	1.12595e-10	9.94848	5797	1508	437	27543	ST18,EYA1,HECW2,SF3B1,BOLL,PLCL1,HSFY2,SATB2,ERBB4,IGFBP5,VIL1,USP37,ZFP142,DNAJB2,EPHA4,CAB39,MDM4,DUSP10,PROX1,ANGEL2,DTL,ACVR2A,NFE2L2,NEUROD1,DNAJC10,NUP35,TFPI,RASGRP1,JAG1,SRC,GNAS,NELFCD,CTSZ,EDN3,ZFP931,ZFHX4,YTHDF3,BBS7,SLC7A11,MAML3,TIPARP,CHTOP,SETDB1,ARNT,ENSA,OTUD7B,SF3B4,BCL9,SEC22B,NOTCH2,TBX15,PTBP2,MYOZ2,LMO4,WWP1,ORC3,MUP5,KDM4C,BNC2,SH3GL2,SSBP3,AGBL4,PHC2,ZFP362,KHDRBS1,PRAMEL…
GO:BP	homeostatic process	GO:0042592	1.27385e-10	9.89488	1732	1508	170	27543	OPRK1,PLCL1,CPS1,ERBB4,IGFBP5,CXCR2,SLC4A3,SLC41A1,CRB1,PLA2G4A,OLFR16,IL2RA,MALRD1,ACVR2A,NFE2L2,NEUROD1,SRC,GNAS,EDN3,CYP7B1,SLC7A11,UBAP2L,CTSK,ATP1A1,ANK2,MUP5,SH3GL2,SLC24A2,SGIP1,NCDN,CDK6,STEAP1,EPHA5,TMEM175,SLC15A4,CFTR,CADPS2,RAB11FIP5,ALMS1,PRCP,SETD1A,GLRX3,INSR,CLN8,LARGE1,EDNRA,INPP4B,ZFP423,TLE3,RORA,CCNB2,LIPC,CITED2,TNFAIP3,ENPP1,L3MBTL3,ANK3,PCDH15,BCR,ADORA2A,CRY1,ATP2B1,BBS10,…
GO:BP	regulation of response to stimulus	GO:0048583	1.29126e-10	9.88899	3926	1508	319	27543	OPRK1,EYA1,ERBB4,IGFBP5,CXCR2,VIL1,EPHA4,MDM4,PLA2G4A,RGS7,DUSP10,PROX1,IL2RA,PIP4K2A,ACVR2A,LRP2,NFE2L2,NEUROD1,FRZB,TFPI,RASGRP1,JAG1,SRC,DOK5,GNAS,EDN3,YTHDF3,CYP7B1,SLC7A11,PGLYRP4,PGLYRP3,OTUD7B,FCGR1,RNF115,CD160,NOTCH2,MYOZ2,ALPK1,MUP5,RGS3,EIF2B3,KHDRBS1,AKAP9,FZD1,CDK14,SEMA3D,HGF,CLNK,TEC,SLC15A4,FZD10,RABGEF1,AUTS2,SLC7A1,MDFIC,EXOC4,ZC3HAV1,MMRN1,EIF2AK3,LMCD1,VGLL4,CLEC4N,VWF,NTF3,PG…
GO:BP	regulation of cellular metabolic process	GO:0031323	1.5724e-10	9.80344	6103	1508	455	27543	ST18,EYA1,SF3B1,BOLL,PLCL1,HSFY2,SATB2,ERBB4,IGFBP5,VIL1,USP37,ZFP142,DNAJB2,EPHA4,CAB39,MDM4,PLA2G4A,DUSP10,PROX1,ANGEL2,MALRD1,PIP4K2A,ACVR2A,NFE2L2,NEUROD1,DNAJC10,NUP35,TFPI,RASGRP1,JAG1,SRC,GNAS,NELFCD,CTSZ,EDN3,ZFP931,EEF1A2,ZFHX4,YTHDF3,BBS7,SLC7A11,MAML3,CHTOP,SETDB1,ARNT,ENSA,OTUD7B,SF3B4,BCL9,SEC22B,NOTCH2,TBX15,ATP1A1,SNX7,PTBP2,MYOZ2,LMO4,WWP1,ORC3,MUP5,KDM4C,BNC2,SH3GL2,SSBP3,AGBL4,P…
GO:BP	movement of cell or subcellular component	GO:0006928	2.82725e-10	9.54864	2127	1508	197	27543	TMEFF2,SATB2,ERBB4,IGFBP5,TNS1,CXCR2,CXCR1,ARPC2,VIL1,EPHA4,ASTN1,DUSP10,PROX1,LAMB3,LRP2,NFE2L2,TTC30A1,ITGA4,RASGRP1,SPG11,JAG1,SRC,PREX1,EDN3,YTHDF3,CYP7B1,PIP5K1A,GJA5,SPAG17,ATP1A1,ANK2,LMO4,ASTN2,AGBL4,AKAP9,CFAP69,SEMA3D,HGF,CRMP1,LIMCH1,ADGRL3,EPHA5,RABGEF1,AUTS2,NTF3,PRCP,DOCK1,INSR,UNC5D,EDNRA,PDGFD,CNTN5,FAT3,KIRREL3,CADM1,TPBG,ITGA9,ULK4,SASH1,CITED2,TNFAIP3,OLIG3,ARHGAP18,LAMA2,WASF1…
GO:BP	organonitrogen compound metabolic process	GO:1901564	3.53895e-10	9.45113	6512	1508	478	27543	ST18,PCMTD1,EYA1,STK17B,HECW2,PGAP1,BOLL,PLCL1,TYW5,CPS1,ERBB4,ATIC,IGFBP5,VIL1,USP37,DNAJB2,EPHA4,DNER,CAB39,DPP10,MDM4,PLA2G4A,EDEM3,DUSP10,PROX1,RPS6KC1,DTL,MSRB2,OTUD1,MYO3A,ACVR2A,CERS6,NFE2L2,UBE2E3,CERKL,DNAJC10,TFPI,RASGRP1,MACROD2,SRC,GNAS,CTSZ,ATP5E,EDN3,EEF1A2,MRPS28,YTHDF3,PDE7A,BBS7,SLC7A11,TIPARP,PMVK,UBE2Q1,CHTOP,PGLYRP4,PGLYRP3,SETDB1,ARNT,CTSK,ENSA,OTUD7B,RNF115,SEC22B,WARS2,COL1…
GO:BP	cell morphogenesis	GO:0000902	3.90801e-10	9.40804	1086	1508	120	27543	TMEFF2,HECW2,ARPC2,VIL1,EPHA4,CRB1,PROX1,LAMB3,LRP2,ITGA4,SPG11,BTBD3,SRC,PREX1,EDN3,UGT8A,SH3GL2,SEMA3D,HGF,CRMP1,FRYL,EPHA5,ENAM,AUTS2,NTF3,DOCK1,UNC5D,EDNRA,CNTN5,FAT3,KIRREL3,CADM1,TPBG,ARHGAP18,LAMA2,WASF1,ANK3,PCDH15,ADORA2A,RAB21,GRIP1,KIF5A,SLIT3,CNTNAP1,ETV1,SIPA1L1,FLRT2,HECW1,SLITRK1,SLITRK6,CDH10,CDH12,HAS2,FMNL3,PRKDC,ST6GAL1,ALCAM,ROBO1,ROBO2,APP,TIAM2,EZR,EPB41L3,WDR36,DCC,CASK,FGF…
GO:BP	behavior	GO:0007610	4.52421e-10	9.34446	741	1508	92	27543	OPRK1,EPHA4,ASTN1,ACVR2A,SPG11,CYP7B1,SLC7A11,UBE2Q1,MUP5,SLC24A2,SGIP1,CFAP69,ADGRL3,MMP17,AUTS2,CRBN,GRM7,NTF3,INSR,CLN8,EDNRA,VPS35,CNTNAP4,KIRREL3,TPBG,ULK4,PCDH15,ADORA2A,GLRA1,GRIA1,ETV1,NRXN3,SLC6A3,RNF180,HTR1A,PDE4D,PLK2,PCDH17,KLHL1,DACH1,SLITRK1,SLITRK6,CSNK1E,PPARA,ETV5,LSAMP,APP,RCAN2,ADCYAP1,MBD2,FGF13,HTR2C,ATP1A2,PPT1,MFSD2A,MME,BCHE,CTNS,AGTR1B,GPR171,P2RY1,PER3,SEZ6L,GIT2,ALDH2,…
GO:BP	regulation of cellular component organization	GO:0051128	4.76354e-10	9.32207	2398	1508	215	27543	TMEFF2,HECW2,IGFBP5,ARPC2,VIL1,DNAJB2,EPHA4,PLA2G4A,PROX1,PIP4K2A,LRP2,NFE2L2,FRZB,ZFP804A,SRC,CTSZ,EDN3,SLC7A11,FCGR1,PDE4DIP,SEC22B,NOTCH2,PLPPR5,SNX7,LMO4,SH3GL2,SGIP1,AKAP9,FZD1,SEMA3D,HGF,CRMP1,LIMCH1,ADGRL3,EPHA5,TCHP,FZD10,RABGEF1,AUTS2,BAZ1B,CAPZA2,LRRTM4,ALMS1,CRBN,VGLL4,NTF3,AKAP13,TMEM135,TEAD1,SETD1A,STX1B,INSR,VPS35,MYLK3,CNOT1,CNTNAP4,FAT3,NTM,ANXA2,CGNL1,TPBG,ULK4,SYNE1,ENPP1,L3MBT…
GO:BP	cell projection organization	GO:0030030	6.6021e-10	9.18032	1627	1508	160	27543	HECW2,ARPC2,VIL1,EPHA4,LRP2,NFE2L2,TTC30A1,ITGA4,ZFP804A,SPG11,BTBD3,SRC,CTSZ,EDN3,BBS7,FAT4,PIP5K1A,SPAG17,PLPPR5,UGT8A,ALPK1,SH3GL2,NCDN,FZD1,CFAP69,SEMA3D,HGF,CRMP1,FRYL,EPHA5,TCHP,AUTS2,ALMS1,GRM7,NTF3,STX1B,INSR,UNC5D,EDNRA,VPS35,ZFP423,CNTN5,FAT3,NTM,KIRREL3,LINGO1,TPBG,ULK4,SYNE1,LAMA2,WASF1,ANK3,PCDH15,ADORA2A,FBXO7,BBS10,RAB21,GRIP1,KIF5A,SLIT3,BCAS3,CNTNAP1,ETV1,SIPA1L1,DNAL1,FLRT2,HECW…
GO:BP	neuron projection development	GO:0031175	8.28303e-10	9.08181	1085	1508	119	27543	HECW2,EPHA4,LRP2,NFE2L2,ITGA4,ZFP804A,SPG11,BTBD3,CTSZ,EDN3,FAT4,PLPPR5,UGT8A,SH3GL2,NCDN,FZD1,SEMA3D,HGF,CRMP1,FRYL,EPHA5,AUTS2,ALMS1,GRM7,NTF3,STX1B,UNC5D,EDNRA,CNTN5,FAT3,NTM,KIRREL3,LINGO1,TPBG,ULK4,LAMA2,WASF1,ANK3,PCDH15,ADORA2A,FBXO7,RAB21,GRIP1,KIF5A,SLIT3,CNTNAP1,ETV1,SIPA1L1,FLRT2,HECW1,ADGRV1,PLK2,KLHL1,SLITRK1,SLITRK6,TWF1,UBE2V2,ALCAM,ROBO1,ROBO2,NCAM2,APP,TIAM2,ARID1B,TNFRSF21,EPB41…
GO:BP	cell surface receptor signaling pathway	GO:0007166	9.33907e-10	9.0297	2812	1508	242	27543	ST18,EYA1,ERBB4,IGFBP5,CXCR2,CXCR1,VIL1,EPHA4,DNER,IL2RA,PIP4K2A,ACVR2A,LRP2,ITGA4,NEUROD1,FRZB,JAG1,SRC,DOK5,EDN3,YTHDF3,BBS7,FAT4,MAML3,TIPARP,FCGR1,RNF115,CD160,BCL9,NOTCH2,MUP5,EIF2B3,KHDRBS1,CDK6,FZD1,CDK14,SEMA3D,HGF,CRMP1,CLNK,TEC,ADGRL3,EPHA5,FZD10,ADGRD1,RABGEF1,MDFIC,GRM8,GRM7,VGLL4,CLEC4N,NTF3,STX1B,INSR,UNC5D,RBPMS,SORBS2,EDNRA,VPS35,ZFP423,SALL1,PDGFD,TLE3,RORA,CD109,TPBG,ITGA9,SASH1…
GO:BP	positive regulation of developmental process	GO:0051094	1.6747e-09	8.77606	1427	1508	144	27543	ERBB4,CXCR2,ARPC2,VIL1,EPHA4,BRINP3,DUSP10,PROX1,IL2RA,ACVR2A,LRP2,NFE2L2,NEUROD1,FRZB,RASGRP1,JAG1,SRC,PREX1,GNAS,EDN3,NOTCH2,WARS2,KDM4C,SGIP1,SSBP3,HGF,ADGRL3,ENAM,CFTR,LRRTM4,NTF3,SOX5,TENM4,DOCK1,INSR,EDNRA,VPS35,MYLK3,TPBG,SASH1,CITED2,MAP3K5,ATP2B1,RAB21,GRIP1,HMGA2,SIX1,FLRT2,PRL7B1,GCNT2,SLC6A3,ADGRV1,ZMIZ1,GATA4,SLITRK1,SLITRK6,ZFPM2,HAS2,UBE2V2,PRKDC,ETV5,ROBO1,APP,TIAM2,EZR,SMOC2,PDPK…
GO:BP	cell communication	GO:0007154	1.76191e-09	8.75402	7546	1508	536	27543	OPRK1,ST18,EYA1,STK17B,PLCL1,ERBB4,IGFBP5,CXCR2,CXCR1,ARPC2,VIL1,EPHA4,DNER,CAB39,MDM4,PLA2G4A,OLFR16,RGS7,DUSP10,PROX1,DTL,IL2RA,PIP4K2A,GPR158,OLFR342,ACVR2A,LRP2,NFE2L2,ITGA4,NEUROD1,PPP1R1C,PDE1A,DNAJC10,FRZB,RASGRP1,SPG11,JAG1,SRC,PREX1,DOK5,GNAS,EDN3,YTHDF3,CYP7B1,PDE7A,BBS7,FAT4,SLC7A11,MAML3,TIPARP,UBE2Q1,TUFT1,PI4KB,ANXA9,ARNT,ENSA,OTUD7B,FCGR1,RNF115,CD160,GJA5,BCL9,NOTCH2,OLFM3,PLPPR5,…
GO:BP	epithelium development	GO:0060429	2.46396e-09	8.60837	1260	1508	131	27543	EYA1,TMEFF2,CPS1,ERBB4,IGFBP5,CXCR2,VIL1,EPHA4,DUSP10,PROX1,LRP2,NEUROD1,FRZB,JAG1,SRC,GNAS,CTSZ,CYP7B1,FAT4,SLC7A11,SPRR2B,SPRR4,LCE1A2,LCE1H,LCE1K,LCE1L,GJA5,NOTCH2,LMO4,ASTN2,SSBP3,CDK6,FZD1,HGF,ENAM,CFTR,ALMS1,EDNRA,SALL1,CD109,MTHFD1L,CITED2,SIM1,IPMK,PCDH15,BCR,GGT1,LGR5,HMGA2,SIX1,DSP,IRX1,PDE4D,RARB,GATA4,SLITRK6,ANGPT1,PRKDC,ETV5,STFA1,FSTL1,ROBO1,EZR,T,PDPK1,IFT140,PNPLA1,FOXP4,SPINK5,N…
GO:BP	animal organ morphogenesis	GO:0009887	3.41721e-09	8.46633	1082	1508	117	27543	EYA1,TMEFF2,SATB2,ERBB4,IGFBP5,MDM4,CRB1,PROX1,LAMB3,ACVR2A,XIRP2,LRP2,NEUROD1,FRZB,JAG1,SRC,GNAS,CTSZ,CYP7B1,FAT4,TIPARP,GJA5,NOTCH2,TBX15,COL11A1,OLFM3,MMP16,FZD1,HGF,ENAM,CFTR,EXOC4,ALMS1,LRIG1,SOX5,INSR,TENM3,CSGALNACT1,EDNRA,SALL1,FAT3,GCNT3,MTHFD1L,CITED2,PERP,TNFAIP3,EYA4,ARG1,LAMA2,PCDH15,BCR,HMGA2,SLIT3,SIX1,FLRT2,FOXN3,DSP,IRX1,RARB,ZMIZ1,GATA4,CPB2,SLITRK6,ZFPM2,ANGPT1,HAS2,PPARA,ETV5,…
GO:BP	synapse organization	GO:0050808	5.05927e-09	8.29591	480	1508	67	27543	ERBB4,EPHA4,ZFP804A,SPG11,SLC7A11,FZD1,GABRA2,ADGRL3,EPHA5,LRRTM4,PDZRN3,PPFIBP1,INSR,SORBS2,VPS35,CNTNAP4,CNTN5,KIRREL3,CADM1,TPBG,WASF1,ANK3,SHISA6,CNTNAP1,SIX1,SIPA1L1,NRXN3,FLRT2,HTR1A,ERC2,PCDH17,SLITRK1,SLITRK6,UBE2V2,ETV5,APP,LRFN2,CRIPT,CBLN2,CASK,FGF13,CHRDL1,FRMPD4,CABP1,SYNDIG1,PFN2,SLITRK3,PTPRD,IGSF21,SEZ6L,SSH1,GRID2,ERC1,TANC2,NTRK2,MEF2C,IL1RAP,EFNA5,NRXN1,PLS3,BHLHB9,GPC6,PIK3R1,…
GO:BP	regulation of multicellular organismal development	GO:2000026	6.54472e-09	8.18411	1494	1508	147	27543	ERBB4,CXCR2,EPHA4,OLFR16,DUSP10,PROX1,IL2RA,ACVR2A,LRP2,NFE2L2,FRZB,RASGRP1,JAG1,GNAS,FAT4,PGLYRP4,PGLYRP3,CTSK,CD160,NOTCH2,WARS2,CDK6,SEMA3D,HGF,ADGRL3,ENAM,CFTR,LRRTM4,VGLL4,NTF3,SOX5,PGLYRP1,TENM4,SETD1A,INSR,INPP4B,LINGO1,ANXA2,CD109,TPBG,SASH1,CITED2,LAMA2,FBXO7,ATP2B1,RAB21,HMGA2,SIX1,FLRT2,PRL7B1,ADGRV1,PLK2,RARB,ZMIZ1,GATA4,SLITRK1,SLITRK6,ZFPM2,COL14A1,NFAM1,PPARA,UBE2V2,PRKDC,ETV5,ROBO…
GO:BP	positive regulation of metabolic process	GO:0009893	6.65579e-09	8.1768	3908	1508	310	27543	ST18,EYA1,HECW2,SF3B1,BOLL,SATB2,ERBB4,ZFP142,DNAJB2,EPHA4,CAB39,PLA2G4A,SEC16B,PROX1,ANGEL2,DTL,PIP4K2A,ACVR2A,NFE2L2,NEUROD1,ZFP804A,RASGRP1,JAG1,SRC,GNAS,EDN3,EEF1A2,YTHDF3,BBS7,MAML3,TIPARP,CHTOP,ARNT,SF3B4,CD160,BCL9,SEC22B,CD2,SNX7,ANK2,LMO4,WWP1,MUP5,KDM4C,SSBP3,AGBL4,KHDRBS1,CDK6,ANKIB1,AKAP9,FZD1,DMTF1,HGF,PRKAG2,CLNK,LIMCH1,TEC,EPHA5,PARM1,FZD10,AUTS2,BAZ1B,MDFIC,ZC3HAV1,NOBOX,EIF2AK3,A…
GO:BP	protein modification process	GO:0036211	6.97873e-09	8.15622	3707	1508	297	27543	PCMTD1,EYA1,STK17B,HECW2,PGAP1,PLCL1,ERBB4,USP37,DNAJB2,EPHA4,CAB39,EDEM3,DUSP10,PROX1,RPS6KC1,DTL,OTUD1,MYO3A,ACVR2A,NFE2L2,UBE2E3,DNAJC10,RASGRP1,MACROD2,SRC,GNAS,EDN3,TIPARP,UBE2Q1,CHTOP,SETDB1,ARNT,ENSA,OTUD7B,RNF115,ALPK1,TTLL7,WWP1,RNF38,KDM4C,SH3GL2,AGBL4,PTP4A2,PRAMEL5,CDK6,ANKIB1,AKAP9,FZD1,CDK14,HGF,PRKAG2,UBE3C,STK32B,LIMCH1,TEC,CWH43,EPHA5,FZD10,PHKG1,RABGEF1,AUTS2,BAZ1B,EIF2AK3,RMND5…
GO:BP	cellular protein modification process	GO:0006464	6.97873e-09	8.15622	3707	1508	297	27543	PCMTD1,EYA1,STK17B,HECW2,PGAP1,PLCL1,ERBB4,USP37,DNAJB2,EPHA4,CAB39,EDEM3,DUSP10,PROX1,RPS6KC1,DTL,OTUD1,MYO3A,ACVR2A,NFE2L2,UBE2E3,DNAJC10,RASGRP1,MACROD2,SRC,GNAS,EDN3,TIPARP,UBE2Q1,CHTOP,SETDB1,ARNT,ENSA,OTUD7B,RNF115,ALPK1,TTLL7,WWP1,RNF38,KDM4C,SH3GL2,AGBL4,PTP4A2,PRAMEL5,CDK6,ANKIB1,AKAP9,FZD1,CDK14,HGF,PRKAG2,UBE3C,STK32B,LIMCH1,TEC,CWH43,EPHA5,FZD10,PHKG1,RABGEF1,AUTS2,BAZ1B,EIF2AK3,RMND5…
GO:BP	signaling	GO:0023052	7.81395e-09	8.10713	7473	1508	528	27543	OPRK1,ST18,EYA1,STK17B,PLCL1,ERBB4,IGFBP5,CXCR2,CXCR1,ARPC2,VIL1,SLC4A3,EPHA4,DNER,CAB39,MDM4,PLA2G4A,OLFR16,RGS7,DUSP10,PROX1,DTL,IL2RA,PIP4K2A,GPR158,OLFR342,ACVR2A,LRP2,NFE2L2,ITGA4,NEUROD1,PPP1R1C,PDE1A,DNAJC10,FRZB,RASGRP1,SPG11,JAG1,SRC,PREX1,DOK5,GNAS,EDN3,YTHDF3,CYP7B1,PDE7A,BBS7,FAT4,SLC7A11,MAML3,TIPARP,UBE2Q1,TUFT1,PI4KB,ANXA9,ARNT,ENSA,OTUD7B,FCGR1,RNF115,CD160,GJA5,BCL9,NOTCH2,OLFM3,…
GO:BP	macromolecule modification	GO:0043412	1.28528e-08	7.891	3898	1508	308	27543	PCMTD1,EYA1,OSGEPL1,STK17B,HECW2,PGAP1,PLCL1,TYW5,ERBB4,USP37,DNAJB2,EPHA4,CAB39,EDEM3,DUSP10,PROX1,RPS6KC1,DTL,ANKRD16,OTUD1,MYO3A,ACVR2A,NFE2L2,UBE2E3,DNAJC10,RASGRP1,MACROD2,SRC,GNAS,EDN3,TIPARP,UBE2Q1,CHTOP,SETDB1,ARNT,ENSA,OTUD7B,RNF115,ALPK1,TTLL7,WWP1,RNF38,KDM4C,SH3GL2,AGBL4,PTP4A2,PRAMEL5,CDK6,ANKIB1,AKAP9,FZD1,CDK14,HGF,PRKAG2,UBE3C,STK32B,LIMCH1,TEC,CWH43,EPHA5,FZD10,PHKG1,RABGEF1,TYW1…
GO:BP	regulation of transport	GO:0051049	1.32767e-08	7.87691	1872	1508	173	27543	OPRK1,HECW2,PGAP1,ERBB4,ARPC2,PLA2G4A,SEC16B,RGS7,ACVR2A,KCNJ3,KCNH7,LRP2,NFE2L2,OSBPL6,SPG11,SRC,GNAS,EDN3,SLC7A11,ENSA,FCGR1,CD160,GJA5,ATP1A1,ANK2,MUP5,SH3GL2,SGIP1,KHDRBS1,AKAP9,DPP6,KCNIP4,EPHA5,RABGEF1,MDFIC,CFTR,CADPS2,GRM8,EXOC4,RAB11FIP5,CRBN,EDEM1,GRM7,CACNA2D4,NTF3,SERGEF,STX1B,SYT8,INSR,SARAF,ISX,EDNRA,INPP4B,VPS35,ANXA2,MYO6,ENPP1,ARG1,AKAP7,ANK3,BCR,ADORA2A,CRY1,ATP2B1,PAWR,RAB21,HM…
GO:BP	positive regulation of macromolecule metabolic process	GO:0010604	1.52901e-08	7.81559	3592	1508	288	27543	ST18,EYA1,HECW2,SF3B1,BOLL,SATB2,ERBB4,ZFP142,DNAJB2,EPHA4,CAB39,SEC16B,PROX1,ANGEL2,DTL,ACVR2A,NFE2L2,NEUROD1,ZFP804A,RASGRP1,JAG1,SRC,GNAS,EDN3,YTHDF3,BBS7,MAML3,TIPARP,CHTOP,ARNT,SF3B4,CD160,BCL9,SEC22B,CD2,ANK2,LMO4,WWP1,MUP5,KDM4C,SSBP3,AGBL4,KHDRBS1,CDK6,ANKIB1,AKAP9,FZD1,DMTF1,HGF,PRKAG2,CLNK,LIMCH1,TEC,PARM1,FZD10,AUTS2,BAZ1B,MDFIC,ZC3HAV1,NOBOX,EIF2AK3,VGLL4,CLEC4N,NTF3,ETV6,ARNTL2,AKAP1…
GO:BP	intracellular signal transduction	GO:0035556	1.61566e-08	7.79165	2516	1508	217	27543	OPRK1,STK17B,PLCL1,ERBB4,IGFBP5,CXCR2,CXCR1,ARPC2,EPHA4,CAB39,MDM4,RGS7,DUSP10,PROX1,DTL,LRP2,NFE2L2,NEUROD1,PPP1R1C,DNAJC10,RASGRP1,SRC,PREX1,DOK5,GNAS,EDN3,PDE7A,FAT4,TUFT1,PI4KB,OTUD7B,CD160,NOTCH2,MYOZ2,ANK2,ALPK1,MUP5,HGF,PRKAG2,STK32B,CLNK,TEC,EPHA5,SLC15A4,FZD10,RABGEF1,AUTS2,SLC7A1,MDFIC,EXOC4,ZC3HAV1,EIF2AK3,ALMS1,LMCD1,VGLL4,CLEC4N,VWF,NTF3,AKAP13,TEAD1,DOCK1,INSR,NR3C2,EDNRA,INPP4B,CAS…
GO:BP	growth	GO:0040007	2.49634e-08	7.6027	1063	1508	113	27543	ERBB4,IGFBP5,VIL1,DNAJB2,DUSP10,PROX1,UBE2E3,ITGA4,FRZB,SPG11,SRC,GNAS,EDN3,BCL9,NOTCH2,BNC2,SH3GL2,SGIP1,SEMA3D,TCHP,AUTS2,ALMS1,VGLL4,AKAP13,TENM4,TEAD1,INSR,WRN,SORBS2,LARGE1,EDNRA,CADM1,CCNB2,CITED2,ENPP1,WASF1,PCDH15,RAB21,HMGA2,SLIT3,SIX1,SLC6A3,PDE4D,RARB,ZMIZ1,GATA4,SLITRK1,SLITRK6,ZFPM2,COL14A1,PPARA,SBF1,PRKDC,IGSF11,ALCAM,APP,EZR,EPB41L3,WDR36,SOCS6,FGF13,NRK,DCX,TRPC5,PPT1,MFSD2A,GPR1…
GO:BP	organic substance biosynthetic process	GO:1901576	2.55174e-08	7.59316	5770	1508	423	27543	ST18,EYA1,TMEFF2,PGAP1,SF3B1,COQ10B,BOLL,HSFY2,SATB2,TYW5,CPS1,ERBB4,ATIC,IGFBP5,ZFP142,MDM4,PLA2G4A,EDEM3,PROX1,DTL,MALRD1,PIP4K2A,ACVR2A,CERS6,NFE2L2,CERKL,NEUROD1,NUP35,HSD17B12,JAG1,SRC,GNAS,NELFCD,ATP5E,ZFP931,EEF1A2,ZFHX4,MRPS28,YTHDF3,CYP7B1,BBS7,SLC7A11,MAML3,PMVK,PI4KB,PIP5K1A,SETDB1,ARNT,OTUD7B,BCL9,NOTCH2,HSD3B1,WARS2,TBX15,TTF2,ATP1A1,AGL,DPYD,MYOZ2,UGT8A,LMO4,WWP1,MUP5,KDM4C,BNC2,SSB…
GO:BP	biosynthetic process	GO:0009058	3.06835e-08	7.51309	5876	1508	429	27543	ST18,EYA1,TMEFF2,PGAP1,SF3B1,COQ10B,BOLL,HSFY2,SATB2,TYW5,CPS1,ERBB4,ATIC,IGFBP5,ZFP142,MDM4,PLA2G4A,EDEM3,PROX1,DTL,MALRD1,PIP4K2A,ACVR2A,CERS6,NFE2L2,CERKL,NEUROD1,NUP35,HSD17B12,JAG1,SRC,GNAS,NELFCD,ATP5E,ZFP931,EEF1A2,ZFHX4,MRPS28,YTHDF3,CYP7B1,BBS7,SLC7A11,MAML3,PMVK,PI4KB,PIP5K1A,SETDB1,ARNT,OTUD7B,BCL9,NOTCH2,HSD3B1,WARS2,TBX15,TTF2,ATP1A1,AGL,DPYD,MYOZ2,UGT8A,LMO4,WWP1,MUP5,KDM4C,BNC2,SSB…
GO:BP	cellular localization	GO:0051641	3.97568e-08	7.40059	2840	1508	237	27543	PGAP1,ERBB4,ARPC2,VIL1,DPP10,CRB1,SEC16B,PIP4K2A,GPR158,LRP2,MTX2,TTC30A1,ITGA4,NEUROD1,NUP35,RASGRP1,SPG11,SRC,EDN3,ARMC1,BBS7,SLC7A11,CHTOP,PIP5K1A,VPS45,OTUD7B,CD160,SEC22B,UGT8A,ANK2,MUP5,ASTN2,SH3GL2,AGBL4,KHDRBS1,PEX1,AKAP9,DPP6,CLNK,KCNIP4,SRP72,EPHA5,RABGEF1,MDFIC,CFTR,CADPS2,GRM8,EXOC4,AGK,LRRTM4,EXOC6B,RAB11FIP5,ALMS1,EDEM1,GRM7,CCDC91,AP2S1,MRGPRA4,AKAP13,XPO6,STX1B,SYT8,CLN8,WRN,SORBS…
GO:BP	developmental growth	GO:0048589	4.12628e-08	7.38444	765	1508	89	27543	ERBB4,VIL1,DUSP10,PROX1,ITGA4,SPG11,SRC,GNAS,EDN3,BCL9,NOTCH2,BNC2,SH3GL2,SGIP1,SEMA3D,AUTS2,ALMS1,VGLL4,AKAP13,TENM4,INSR,SORBS2,LARGE1,EDNRA,CADM1,CITED2,WASF1,PCDH15,RAB21,HMGA2,SLIT3,SIX1,SLC6A3,PDE4D,RARB,ZMIZ1,GATA4,SLITRK1,SLITRK6,ZFPM2,COL14A1,PPARA,PRKDC,ALCAM,APP,EZR,WDR36,FGF13,NRK,DCX,TRPC5,MFSD2A,GPR149,BMPR2,TNN,RGS4,KIF26B,TTL,WWTR1,IGSF10,BMPR1B,AKIRIN1,PAX7,ACACB,EIF4H,CXCL12,SCN…
GO:BP	cell migration	GO:0016477	4.40487e-08	7.35607	1505	1508	145	27543	TMEFF2,SATB2,ERBB4,IGFBP5,TNS1,CXCR2,CXCR1,ARPC2,VIL1,EPHA4,ASTN1,DUSP10,PROX1,LAMB3,NFE2L2,ITGA4,JAG1,SRC,PREX1,EDN3,YTHDF3,CYP7B1,PIP5K1A,LMO4,ASTN2,SEMA3D,HGF,LIMCH1,ADGRL3,RABGEF1,AUTS2,NTF3,PRCP,DOCK1,INSR,UNC5D,EDNRA,PDGFD,FAT3,KIRREL3,CADM1,TPBG,ITGA9,ULK4,SASH1,CITED2,TNFAIP3,OLIG3,LAMA2,BCR,PAWR,NAV3,BCAS3,SIX1,FLRT2,ELMO1,GCNT2,MCTP1,DEPDC1B,PDE4D,PLK2,ZMIZ1,DACH1,ANGPT1,HAS2,FMNL3,EFCA…
GO:BP	regulation of metabolic process	GO:0019222	5.47236e-08	7.26183	7320	1508	514	27543	ST18,EYA1,TMEFF2,HECW2,SF3B1,BOLL,PLCL1,HSFY2,SATB2,ERBB4,IGFBP5,VIL1,USP37,ZFP142,DNAJB2,EPHA4,CAB39,MDM4,PLA2G4A,SEC16B,DUSP10,PROX1,ANGEL2,DTL,MALRD1,PIP4K2A,ACVR2A,NFE2L2,NEUROD1,DNAJC10,NUP35,ZFP804A,TFPI,RASGRP1,JAG1,SRC,GNAS,NELFCD,CTSZ,EDN3,ZFP931,EEF1A2,ZFHX4,YTHDF3,BBS7,SLC7A11,MAML3,TIPARP,CHTOP,PGLYRP4,PGLYRP3,SETDB1,ARNT,ENSA,OTUD7B,SF3B4,CD160,BCL9,SEC22B,NOTCH2,TBX15,CD2,ATP1A1,SNX…
GO:BP	organic substance transport	GO:0071702	6.95554e-08	7.15767	2466	1508	211	27543	OPRK1,PGAP1,RFTN2,ERBB4,ARPC2,VIL1,SLC4A3,PLA2G4A,SEC16B,PIP4K2A,LRP2,MTX2,NFE2L2,OSBPL6,NEUROD1,NUP35,SPG11,SRC,EDN3,BBS7,SLC7A11,UBE2Q1,CHTOP,ENSA,VPS45,GJA5,SEC22B,SNX7,ANK2,SLC7A13,MUP5,ASTN2,OSBPL9,KHDRBS1,PEX1,SRP72,EPHA5,SLC15A4,RABGEF1,SLC7A1,MDFIC,CFTR,CADPS2,EXOC4,AGK,EXOC6B,RAB11FIP5,NUP210,EDEM1,GRM7,CCDC91,AP2S1,SLC1A5,SERGEF,SLC28A1,XPO6,SPNS1,STX1B,SYT8,INSR,CLN8,EDNRA,VPS35,GOT2,S…
GO:BP	phosphate-containing compound metabolic process	GO:0006796	1.03768e-07	6.98394	2777	1508	231	27543	EYA1,STK17B,PGAP1,PLCL1,CPS1,ERBB4,ATIC,EPHA4,CAB39,PLA2G4A,DUSP10,PROX1,RPS6KC1,PIP4K2A,MYO3A,ACVR2A,CERKL,DNAJC10,RASGRP1,SRC,GNAS,ATP5E,EDN3,EEF1A2,PDE7A,PMVK,PI4KB,PIP5K1A,ENSA,ATP1A1,PLPPR5,DPYD,ALPK1,LMO4,SH3GL2,PTP4A2,CDK6,AKAP9,FZD1,CDK14,HGF,PRKAG2,SELENOI,STK32B,G6PD2,LIMCH1,TEC,CWH43,PAICS,EPHA5,FZD10,PSPH,PHKG1,RABGEF1,BAZ1B,AGK,PPP1R17,EIF2AK3,CLEC4N,NTF3,AKAP13,SBK1,INSR,CLN8,RBPMS,…
GO:BP	positive regulation of nitrogen compound metabolic process	GO:0051173	1.17032e-07	6.93169	3177	1508	257	27543	ST18,EYA1,HECW2,SF3B1,BOLL,SATB2,ERBB4,ZFP142,DNAJB2,EPHA4,CAB39,PROX1,DTL,ACVR2A,NFE2L2,NEUROD1,RASGRP1,JAG1,SRC,GNAS,EDN3,YTHDF3,BBS7,MAML3,TIPARP,CHTOP,ARNT,SF3B4,BCL9,SEC22B,LMO4,WWP1,SSBP3,AGBL4,KHDRBS1,ANKIB1,AKAP9,FZD1,DMTF1,HGF,PRKAG2,LIMCH1,TEC,PARM1,FZD10,AUTS2,BAZ1B,MDFIC,ZC3HAV1,NOBOX,EIF2AK3,VGLL4,CLEC4N,NTF3,ETV6,ARNTL2,AKAP13,TEAD1,ZFP668,KAT8,INSR,WRN,RBPMS,EDNRA,VPS35,ZFP423,SALL…
GO:BP	cell junction assembly	GO:0034329	1.19126e-07	6.92399	435	1508	60	27543	ERBB4,TNS1,SRC,PIP5K1A,GJA5,UGT8A,ANK2,FZD1,LIMCH1,GABRA2,ADGRL3,LRRTM4,VPS35,CNTN5,KIRREL3,CADM1,TPBG,BCR,BCAS3,CNTNAP1,SIX1,SIPA1L1,NRXN3,FLRT2,PCDH17,SLITRK1,SLITRK6,CDH10,CDH12,UBE2V2,APP,PDPK1,EPB41L3,CBLN2,FGF13,ARHGAP6,CDH20,PKP4,SYNDIG1,SLITRK3,PTPRD,GRID2,GJA1,TBCD,NTRK2,MEF2C,CDH6,SNAI2,IL1RAP,CLDN8,EFNA5,NRXN1,BHLHB9,GPC6,PRKCA,PIK3R1,EEF2K,LINGO2,OCLN,MARVELD2
GO:BP	phosphorus metabolic process	GO:0006793	1.22706e-07	6.91113	2797	1508	232	27543	EYA1,STK17B,PGAP1,PLCL1,CPS1,ERBB4,ATIC,EPHA4,CAB39,PLA2G4A,DUSP10,PROX1,RPS6KC1,PIP4K2A,MYO3A,ACVR2A,CERKL,DNAJC10,RASGRP1,SRC,GNAS,ATP5E,EDN3,EEF1A2,PDE7A,PMVK,PI4KB,PIP5K1A,ENSA,ATP1A1,PLPPR5,DPYD,ALPK1,LMO4,SH3GL2,PTP4A2,CDK6,AKAP9,FZD1,CDK14,HGF,PRKAG2,SELENOI,STK32B,G6PD2,LIMCH1,TEC,CWH43,PAICS,EPHA5,FZD10,PSPH,PHKG1,RABGEF1,BAZ1B,AGK,PPP1R17,EIF2AK3,CLEC4N,NTF3,AKAP13,SBK1,INSR,CLN8,RBPMS,…
GO:BP	establishment of localization in cell	GO:0051649	1.3201e-07	6.87939	1998	1508	178	27543	PGAP1,ARPC2,SEC16B,PIP4K2A,LRP2,MTX2,TTC30A1,ITGA4,NEUROD1,NUP35,RASGRP1,SPG11,SRC,EDN3,BBS7,CHTOP,VPS45,CD160,SEC22B,MUP5,SH3GL2,AGBL4,KHDRBS1,PEX1,CLNK,SRP72,EPHA5,RABGEF1,MDFIC,CFTR,CADPS2,GRM8,EXOC4,AGK,EXOC6B,RAB11FIP5,ALMS1,EDEM1,GRM7,CCDC91,AP2S1,MRGPRA4,AKAP13,XPO6,STX1B,SYT8,CLN8,INPP4B,VPS35,ANXA2,SYNE1,STX7,TRAPPC3L,WASF1,ANK3,ZWINT,BCR,ADORA2A,FBXO7,SYN3,RAB21,GRIP1,KIF5A,EIF4ENIF1,AB…
GO:BP	protein metabolic process	GO:0019538	1.36181e-07	6.86588	5623	1508	410	27543	ST18,PCMTD1,EYA1,STK17B,HECW2,PGAP1,BOLL,PLCL1,CPS1,ERBB4,IGFBP5,VIL1,USP37,DNAJB2,EPHA4,DNER,CAB39,DPP10,MDM4,EDEM3,DUSP10,PROX1,RPS6KC1,DTL,MSRB2,OTUD1,MYO3A,ACVR2A,NFE2L2,UBE2E3,DNAJC10,TFPI,RASGRP1,MACROD2,SRC,GNAS,CTSZ,EDN3,EEF1A2,MRPS28,YTHDF3,BBS7,TIPARP,UBE2Q1,CHTOP,SETDB1,ARNT,CTSK,ENSA,OTUD7B,RNF115,SEC22B,WARS2,COL11A1,ALPK1,TTLL7,MMP16,WWP1,RNF38,KDM4C,SH3GL2,AGBL4,EIF2B3,PSMB2,KHDRBS…
GO:BP	head development	GO:0060322	1.95159e-07	6.70961	813	1508	91	27543	PGAP1,SATB2,ERBB4,ATIC,CXCR2,RGS7,PROX1,LRP2,NEUROD1,BTBD3,MACROD2,SRC,BBS7,FAT4,SLC7A11,TIPARP,HSD3B1,PTBP2,SSBP3,HTR5A,ADGRL3,EPHA5,NTF3,SBK1,SETD1A,WRN,EDNRA,ZFP423,SALL1,KIRREL3,CADM1,RORA,ULK4,BCR,ATP2B1,HMGA2,SIX1,SLC6A3,RARB,ZMIZ1,KLHL1,DNAH5,TRAPPC9,SLC38A2,FAIM2,PRKDC,B3GNT5,ROBO1,ROBO2,APP,CBS,TWSG1,ADCYAP1,SALL3,FGF13,DCX,ATP1A2,AKT3,PPT1,MFSD2A,CTNS,XRCC5,INHBB,RGS4,HSD3B5,UNC5C,SEZ6L…
GO:BP	brain development	GO:0007420	1.99886e-07	6.69922	763	1508	87	27543	PGAP1,SATB2,ERBB4,ATIC,CXCR2,RGS7,PROX1,LRP2,NEUROD1,BTBD3,MACROD2,SRC,BBS7,FAT4,SLC7A11,HSD3B1,PTBP2,SSBP3,HTR5A,ADGRL3,EPHA5,NTF3,SBK1,SETD1A,WRN,ZFP423,SALL1,KIRREL3,CADM1,RORA,ULK4,BCR,ATP2B1,HMGA2,SLC6A3,RARB,ZMIZ1,KLHL1,DNAH5,TRAPPC9,SLC38A2,FAIM2,PRKDC,B3GNT5,ROBO1,ROBO2,APP,CBS,TWSG1,ADCYAP1,SALL3,FGF13,DCX,ATP1A2,AKT3,PPT1,MFSD2A,CTNS,XRCC5,INHBB,RGS4,HSD3B5,UNC5C,SEZ6L,GRID2,CXCL12,ATXN…
GO:BP	cellular component organization	GO:0016043	2.45009e-07	6.61082	7353	1508	512	27543	EYA1,TMEFF2,HECW2,SF3B1,SATB2,ERBB4,IGFBP5,TNS1,ARPC2,VIL1,DNAJB2,EPHA4,SPP2,MDM4,CRB1,PLA2G4A,HMCN1,SEC16B,KCTD3,PROX1,LAMB3,PIP4K2A,MSRB2,XIRP2,LRP2,MTX2,NFE2L2,TTC30A1,ITGA4,FRZB,NUP35,ZFP804A,HSD17B12,SPG11,BTBD3,SRC,GNAS,CTSZ,EDN3,YTHDF3,ARMC1,BBS7,FAT4,SLC7A11,UBAP2L,TCHH,PI4KB,PIP5K1A,SETDB1,PRPF3,ANP32E,FCGR1,GJA5,PDE4DIP,SEC22B,NOTCH2,SPAG17,TTF2,COL11A1,PLPPR5,SNX7,PTBP2,MYOZ2,UGT8A,ANK…
GO:BP	tube development	GO:0035295	2.4936e-07	6.60317	1157	1508	117	27543	EYA1,CPS1,IGFBP5,CXCR2,EPHA4,OLFR16,PROX1,LRP2,NFE2L2,JAG1,SRC,CTSZ,FAT4,SLC7A11,TIPARP,CD160,GJA5,NOTCH2,WARS2,LMO4,WWP1,SSBP3,GJB5,FZD1,HGF,CFTR,EIF2AK3,PRCP,EDNRA,SALL1,RORA,ANXA2,MTHFD1L,SASH1,CITED2,ARG1,SIM1,IPMK,LGR5,HMGA2,BCAS3,SIX1,NRXN3,IRX1,PLK2,RARB,ZMIZ1,GATA4,ZFPM2,ANGPT1,HAS2,FMNL3,ETV5,ROBO1,T,SMOC2,PDPK1,IFT140,PKNOX1,FOXP4,LHCGR,AKT3,MME,ITGB8,BMPR2,INHBB,TNN,SDCCAG8,KIF26B,RBBP…
GO:BP	regulation of molecular function	GO:0065009	2.66698e-07	6.57398	3003	1508	244	27543	ST18,HECW2,PLCL1,ERBB4,VIL1,DNAJB2,EPHA4,CAB39,RGS7,DUSP10,PROX1,PIP4K2A,ACVR2A,ITGA4,NEUROD1,PPP1R1C,DNAJC10,TFPI,RASGRP1,SRC,PREX1,GNAS,CTSZ,EDN3,EEF1A2,CHTOP,PIP5K1A,ANXA9,ENSA,ANP32E,ANK2,LMO4,RGS3,EIF2B3,AKAP9,FZD1,HGF,PRKAG2,CRMP1,EPHA5,PARM1,COX6A1,FZD10,RABGEF1,CFTR,ZC3HAV1,PPP1R17,CRBN,GRM7,NTF3,SERGEF,AKAP13,DOCK1,INSR,WRN,ARHGAP10,EDNRA,CASP12,PDGFD,ANXA2,CCNB2,CD109,TBC1D2B,RASA2,SASH…
GO:BP	synaptic signaling	GO:0099536	2.90354e-07	6.53707	896	1508	97	27543	PLCL1,ERBB4,EPHA4,OLFR16,SPG11,SRC,EDN3,SLC7A11,ANXA9,SLC24A2,NCDN,AKAP9,HTR5A,GABRA2,RIMBP2,CADPS2,GRM8,EXOC4,GRM7,NTF3,STX1B,SYT8,SORBS2,CNTNAP4,CADM1,TPBG,AKAP7,LAMA2,BCR,ADORA2A,SYN3,GLRA1,GRIA1,SHISA6,SIPA1L1,NRXN3,STON2,SLC6A3,SLC12A7,MCTP1,HTR1A,PLK2,ERC2,PCDH17,SHISA9,ETV5,IGSF11,HTR1F,MIRLET7C-1,APP,ARID1B,LRFN2,ADCYAP1,CELF4,DCC,CBLN2,CASK,CHRDL1,HTR2C,DLGAP4,PPT1,MME,BCHE,CABP1,GABRP,R…
GO:BP	cellular protein metabolic process	GO:0044267	3.52143e-07	6.45328	4958	1508	367	27543	ST18,PCMTD1,EYA1,STK17B,HECW2,PGAP1,BOLL,PLCL1,ERBB4,IGFBP5,VIL1,USP37,DNAJB2,EPHA4,DNER,CAB39,EDEM3,DUSP10,PROX1,RPS6KC1,DTL,MSRB2,OTUD1,MYO3A,ACVR2A,NFE2L2,UBE2E3,DNAJC10,TFPI,RASGRP1,MACROD2,SRC,GNAS,CTSZ,EDN3,EEF1A2,MRPS28,YTHDF3,BBS7,TIPARP,UBE2Q1,CHTOP,SETDB1,ARNT,CTSK,ENSA,OTUD7B,RNF115,WARS2,ALPK1,TTLL7,WWP1,RNF38,KDM4C,SH3GL2,AGBL4,EIF2B3,PSMB2,KHDRBS1,PTP4A2,PRAMEL5,CDK6,ANKIB1,AKAP9,FZ…
GO:BP	positive regulation of cellular metabolic process	GO:0031325	3.94561e-07	6.40389	3386	1508	268	27543	ST18,EYA1,SF3B1,BOLL,SATB2,ERBB4,ZFP142,DNAJB2,EPHA4,CAB39,PLA2G4A,PROX1,PIP4K2A,ACVR2A,NFE2L2,NEUROD1,RASGRP1,JAG1,SRC,GNAS,EDN3,EEF1A2,YTHDF3,BBS7,MAML3,CHTOP,ARNT,SF3B4,BCL9,SNX7,LMO4,MUP5,SSBP3,AGBL4,KHDRBS1,ANKIB1,AKAP9,FZD1,DMTF1,HGF,PRKAG2,LIMCH1,TEC,EPHA5,PARM1,FZD10,AUTS2,BAZ1B,MDFIC,ZC3HAV1,NOBOX,EIF2AK3,VGLL4,CLEC4N,NTF3,ETV6,ARNTL2,AKAP13,TEAD1,ZFP668,KAT8,INSR,WRN,RBPMS,EDNRA,VPS35,Z…
GO:BP	trans-synaptic signaling	GO:0099537	4.37174e-07	6.35935	864	1508	94	27543	PLCL1,ERBB4,EPHA4,OLFR16,SPG11,SRC,EDN3,SLC7A11,ANXA9,SLC24A2,NCDN,AKAP9,HTR5A,GABRA2,RIMBP2,CADPS2,GRM8,EXOC4,GRM7,NTF3,STX1B,SYT8,CNTNAP4,CADM1,TPBG,AKAP7,LAMA2,BCR,ADORA2A,SYN3,GLRA1,GRIA1,SHISA6,SIPA1L1,NRXN3,STON2,SLC6A3,SLC12A7,MCTP1,HTR1A,PLK2,ERC2,PCDH17,SHISA9,ETV5,IGSF11,HTR1F,MIRLET7C-1,APP,ARID1B,LRFN2,ADCYAP1,CELF4,DCC,CBLN2,CASK,CHRDL1,HTR2C,DLGAP4,PPT1,MME,BCHE,GABRP,RGS4,NAPB,KCNB…
GO:BP	cell motility	GO:0048870	4.55744e-07	6.34128	1697	1508	155	27543	TMEFF2,SATB2,ERBB4,IGFBP5,TNS1,CXCR2,CXCR1,ARPC2,VIL1,EPHA4,ASTN1,DUSP10,PROX1,LAMB3,NFE2L2,ITGA4,JAG1,SRC,PREX1,EDN3,YTHDF3,CYP7B1,PIP5K1A,LMO4,ASTN2,CFAP69,SEMA3D,HGF,LIMCH1,ADGRL3,RABGEF1,AUTS2,NTF3,PRCP,DOCK1,INSR,UNC5D,EDNRA,PDGFD,FAT3,KIRREL3,CADM1,TPBG,ITGA9,ULK4,SASH1,CITED2,TNFAIP3,OLIG3,ARHGAP18,LAMA2,BCR,PAWR,NAV3,BCAS3,SIX1,FLRT2,ELMO1,GCNT2,MCTP1,DEPDC1B,PDE4D,PLK2,ZMIZ1,DACH1,DNAH5,…
GO:BP	localization of cell	GO:0051674	4.55744e-07	6.34128	1697	1508	155	27543	TMEFF2,SATB2,ERBB4,IGFBP5,TNS1,CXCR2,CXCR1,ARPC2,VIL1,EPHA4,ASTN1,DUSP10,PROX1,LAMB3,NFE2L2,ITGA4,JAG1,SRC,PREX1,EDN3,YTHDF3,CYP7B1,PIP5K1A,LMO4,ASTN2,CFAP69,SEMA3D,HGF,LIMCH1,ADGRL3,RABGEF1,AUTS2,NTF3,PRCP,DOCK1,INSR,UNC5D,EDNRA,PDGFD,FAT3,KIRREL3,CADM1,TPBG,ITGA9,ULK4,SASH1,CITED2,TNFAIP3,OLIG3,ARHGAP18,LAMA2,BCR,PAWR,NAV3,BCAS3,SIX1,FLRT2,ELMO1,GCNT2,MCTP1,DEPDC1B,PDE4D,PLK2,ZMIZ1,DACH1,DNAH5,…
GO:BP	synapse assembly	GO:0007416	5.39353e-07	6.26813	189	1508	35	27543	ERBB4,FZD1,GABRA2,ADGRL3,LRRTM4,VPS35,CNTN5,KIRREL3,CADM1,TPBG,SIX1,SIPA1L1,NRXN3,FLRT2,PCDH17,SLITRK1,SLITRK6,UBE2V2,APP,CBLN2,FGF13,SYNDIG1,SLITRK3,PTPRD,GRID2,NTRK2,MEF2C,IL1RAP,EFNA5,NRXN1,BHLHB9,GPC6,PIK3R1,EEF2K,LINGO2
GO:BP	macromolecule localization	GO:0033036	6.63515e-07	6.17815	2970	1508	240	27543	PGAP1,RFTN2,ERBB4,ARPC2,VIL1,DNAJB2,DPP10,CRB1,PLA2G4A,SEC16B,PIP4K2A,GPR158,LRP2,MTX2,OSBPL6,ITGA4,NEUROD1,NUP35,SPG11,SRC,BBS7,SLC7A11,UBE2Q1,CHTOP,PIP5K1A,ENSA,VPS45,OTUD7B,GJA5,SEC22B,SNX7,UGT8A,ANK2,MUP5,ASTN2,OSBPL9,KHDRBS1,PEX1,DPP6,KCNIP4,SRP72,EPHA5,SLC15A4,RABGEF1,MDFIC,CFTR,CADPS2,EXOC4,AGK,LRRTM4,EXOC6B,RAB11FIP5,NUP210,EDEM1,CCDC91,AP2S1,SERGEF,TMEM135,XPO6,SPNS1,STX1B,WRN,SORBS2,EDN…
GO:BP	cellular component organization or biogenesis	GO:0071840	7.85504e-07	6.10485	7543	1508	520	27543	EYA1,TMEFF2,HECW2,SF3B1,SATB2,ERBB4,IGFBP5,TNS1,ARPC2,VIL1,DNAJB2,EPHA4,SPP2,MDM4,CRB1,PLA2G4A,HMCN1,SEC16B,KCTD3,PROX1,LAMB3,PIP4K2A,MSRB2,XIRP2,LRP2,MTX2,NFE2L2,TTC30A1,ITGA4,FRZB,NUP35,ZFP804A,HSD17B12,SPG11,BTBD3,SRC,GNAS,CTSZ,EDN3,YTHDF3,ARMC1,BBS7,FAT4,SLC7A11,UBAP2L,TCHH,PI4KB,PIP5K1A,SETDB1,PRPF3,ANP32E,FCGR1,GJA5,PDE4DIP,SEC22B,NOTCH2,SPAG17,TTF2,COL11A1,PLPPR5,SNX7,PTBP2,MYOZ2,UGT8A,ANK…
GO:BP	embryo development	GO:0009790	8.92399e-07	6.04944	1236	1508	121	27543	EYA1,PGAP1,SATB2,ERBB4,PROX1,LAMB3,ETL4,ACVR2A,LRP2,NFE2L2,ITGA4,NEUROD1,FRZB,DHX35,GNAS,CHTOP,ARNT,OTUD7B,GJA5,NOTCH2,TBX15,COL11A1,LMO4,MMP16,KDM4C,SSBP3,AGBL4,GJB5,FZD1,PSPH,EXOC4,LRIG1,SOX5,TENM4,INSR,EDNRA,SALL1,CNOT1,CCNB2,MTHFD1L,CITED2,TNFAIP3,EYA4,LAMA2,IPMK,PCDH15,BCR,RTCB,HMGA2,TPO,SIX1,IRX1,RARB,ZMIZ1,GATA4,SLITRK6,ZFPM2,ANGPT1,ADCY9,PRKDC,HIRA,T,IFT140,FOXP4,TWSG1,CELF4,MBD2,NSDHL,NR…
GO:BP	cellular biosynthetic process	GO:0044249	8.96173e-07	6.04761	5701	1508	410	27543	ST18,EYA1,PGAP1,SF3B1,COQ10B,BOLL,HSFY2,SATB2,CPS1,ERBB4,ATIC,IGFBP5,ZFP142,MDM4,PLA2G4A,EDEM3,PROX1,DTL,MALRD1,PIP4K2A,ACVR2A,CERS6,NFE2L2,CERKL,NEUROD1,NUP35,HSD17B12,JAG1,SRC,GNAS,NELFCD,ATP5E,ZFP931,EEF1A2,ZFHX4,MRPS28,YTHDF3,CYP7B1,BBS7,SLC7A11,MAML3,PMVK,PI4KB,PIP5K1A,SETDB1,ARNT,OTUD7B,BCL9,NOTCH2,WARS2,TBX15,TTF2,ATP1A1,AGL,DPYD,MYOZ2,UGT8A,LMO4,WWP1,MUP5,KDM4C,BNC2,SSBP3,EIF2B3,PHC2,ZFP3…
GO:BP	regulation of macromolecule metabolic process	GO:0060255	9.99472e-07	6.00023	6825	1508	477	27543	ST18,EYA1,TMEFF2,HECW2,SF3B1,BOLL,PLCL1,HSFY2,SATB2,ERBB4,IGFBP5,VIL1,USP37,ZFP142,DNAJB2,EPHA4,CAB39,MDM4,SEC16B,DUSP10,PROX1,ANGEL2,DTL,ACVR2A,NFE2L2,NEUROD1,DNAJC10,NUP35,ZFP804A,TFPI,RASGRP1,JAG1,SRC,GNAS,NELFCD,CTSZ,EDN3,ZFP931,ZFHX4,YTHDF3,BBS7,MAML3,TIPARP,CHTOP,PGLYRP4,PGLYRP3,SETDB1,ARNT,ENSA,OTUD7B,SF3B4,CD160,BCL9,SEC22B,NOTCH2,TBX15,CD2,PTBP2,MYOZ2,ANK2,LMO4,WWP1,ORC3,MUP5,KDM4C,BNC2,…
GO:BP	organic cyclic compound biosynthetic process	GO:1901362	1.34426e-06	5.87152	4203	1508	317	27543	ST18,EYA1,SF3B1,HSFY2,SATB2,CPS1,ERBB4,ATIC,ZFP142,MDM4,PROX1,DTL,MALRD1,ACVR2A,NFE2L2,NEUROD1,NUP35,HSD17B12,JAG1,SRC,GNAS,NELFCD,ATP5E,ZFP931,ZFHX4,CYP7B1,BBS7,SLC7A11,MAML3,PMVK,SETDB1,ARNT,OTUD7B,BCL9,NOTCH2,HSD3B1,TBX15,TTF2,ATP1A1,MYOZ2,LMO4,WWP1,MUP5,KDM4C,BNC2,SSBP3,PHC2,ZFP362,KHDRBS1,PRAMEL5,CDK6,MTERF1B,FZD1,CDK14,DMTF1,HGF,PAICS,EPHA5,PARM1,TCHP,AUTS2,BAZ1B,MDFIC,CFTR,NOBOX,KRBA1,EIF2…
GO:BP	regulation of synapse assembly	GO:0051963	1.95728e-06	5.70835	117	1508	26	27543	FZD1,ADGRL3,LRRTM4,TPBG,SIX1,SIPA1L1,FLRT2,SLITRK1,SLITRK6,UBE2V2,APP,CBLN2,SYNDIG1,SLITRK3,PTPRD,GRID2,NTRK2,MEF2C,IL1RAP,EFNA5,NRXN1,BHLHB9,GPC6,PIK3R1,EEF2K,LINGO2
GO:BP	transmembrane transport	GO:0055085	1.99589e-06	5.69986	1518	1508	140	27543	OPRK1,HECW2,ERBB4,SLC4A3,SLC41A1,RGS7,KCNT1,KCNJ3,KCNH7,LRP2,NFE2L2,EDN3,SLC7A11,KCNN3,ANXA9,GJA5,ATP1A1,ANK2,CNGB3,SLC7A13,SLC24A2,GJB5,PEX1,AKAP9,DPP6,KCNIP4,GABRA2,TMEM175,COX6A1,SLC15A4,SLC7A1,CFTR,SLC41A3,CRBN,GRM7,CACNA2D4,SLC1A5,SLC28A1,SPNS1,INSR,CLN8,EDNRA,ABCC12,ANXA2,ENPP1,ARG1,AKAP7,ANK3,BCR,ATP2B1,PAWR,SLC35E4,ABCA13,GLRA1,GRIA1,SHISA6,TMED10,HECW1,SLC6A3,SLC6A18,SLC12A7,PDE4D,CACNA2…
GO:BP	chemical synaptic transmission	GO:0007268	2.80843e-06	5.55154	856	1508	91	27543	PLCL1,ERBB4,EPHA4,OLFR16,SPG11,SRC,EDN3,SLC7A11,ANXA9,SLC24A2,NCDN,AKAP9,HTR5A,GABRA2,RIMBP2,CADPS2,GRM8,EXOC4,GRM7,NTF3,STX1B,SYT8,CNTNAP4,TPBG,AKAP7,LAMA2,BCR,ADORA2A,SYN3,GLRA1,GRIA1,SHISA6,SIPA1L1,NRXN3,STON2,SLC6A3,SLC12A7,MCTP1,HTR1A,PLK2,ERC2,PCDH17,SHISA9,ETV5,IGSF11,HTR1F,MIRLET7C-1,APP,ARID1B,LRFN2,ADCYAP1,CELF4,DCC,CBLN2,CASK,CHRDL1,HTR2C,DLGAP4,PPT1,MME,BCHE,GABRP,RGS4,NAPB,KCNB1,PFN2…
GO:BP	anterograde trans-synaptic signaling	GO:0098916	2.80843e-06	5.55154	856	1508	91	27543	PLCL1,ERBB4,EPHA4,OLFR16,SPG11,SRC,EDN3,SLC7A11,ANXA9,SLC24A2,NCDN,AKAP9,HTR5A,GABRA2,RIMBP2,CADPS2,GRM8,EXOC4,GRM7,NTF3,STX1B,SYT8,CNTNAP4,TPBG,AKAP7,LAMA2,BCR,ADORA2A,SYN3,GLRA1,GRIA1,SHISA6,SIPA1L1,NRXN3,STON2,SLC6A3,SLC12A7,MCTP1,HTR1A,PLK2,ERC2,PCDH17,SHISA9,ETV5,IGSF11,HTR1F,MIRLET7C-1,APP,ARID1B,LRFN2,ADCYAP1,CELF4,DCC,CBLN2,CASK,CHRDL1,HTR2C,DLGAP4,PPT1,MME,BCHE,GABRP,RGS4,NAPB,KCNB1,PFN2…
GO:BP	cellular macromolecule metabolic process	GO:0044260	3.0226e-06	5.51962	5820	1508	414	27543	ST18,PCMTD1,EYA1,STK17B,HECW2,PGAP1,BOLL,PLCL1,ERBB4,IGFBP5,VIL1,USP37,DNAJB2,EPHA4,DNER,CAB39,EDEM3,DUSP10,PROX1,RPS6KC1,ANGEL2,DTL,MSRB2,OTUD1,MYO3A,ACVR2A,NFE2L2,UBE2E3,DNAJC10,TFPI,RASGRP1,MACROD2,SRC,GNAS,CTSZ,EDN3,EEF1A2,MRPS28,YTHDF3,BBS7,TIPARP,UBE2Q1,CHTOP,SETDB1,ARNT,CTSK,ENSA,OTUD7B,RNF115,WARS2,COL11A1,AGL,ALPK1,TTLL7,WWP1,ORC3,RNF38,KDM4C,SH3GL2,AGBL4,EIF2B3,PSMB2,KHDRBS1,PTP4A2,PRAM…
GO:BP	cellular process	GO:0009987	3.08678e-06	5.51049	21177	1508	1252	27543	OPRK1,ST18,PCMTD1,EYA1,FAM135A,TMEFF2,OSGEPL1,STK17B,HECW2,PGAP1,SF3B1,COQ10B,BOLL,PLCL1,HSFY2,SATB2,TYW5,CRYGF,CPS1,ERBB4,ATIC,IGFBP5,TNS1,CXCR2,CXCR1,ARPC2,VIL1,USP37,ZFP142,DNAJB2,SLC4A3,EPHA4,DNER,CAB39,SPP2,DPP10,SLC41A1,MDM4,CRB1,BRINP3,PLA2G4A,HMCN1,EDEM3,SEC16B,ASTN1,OLFR16,RGS7,DUSP10,KCTD3,PROX1,RPS6KC1,ANGEL2,DTL,LAMB3,IL2RA,ANKRD16,MALRD1,PIP4K2A,MSRB2,OTUD1,GPR158,MYO3A,KCNT1,OLFR342…
GO:BP	circulatory system development	GO:0072359	3.25711e-06	5.48717	1180	1508	115	27543	EYA1,ERBB4,CXCR2,MDM4,OLFR16,PROX1,XIRP2,LRP2,NFE2L2,JAG1,BBS7,FAT4,TIPARP,CD160,GJA5,NOTCH2,WARS2,COL11A1,ANK2,LMO4,FZD1,HGF,EIF2AK3,VGLL4,AKAP13,PRCP,TENM4,INSR,SORBS2,EDNRA,MYLK3,SALL1,PDGFD,RORA,ANXA2,SASH1,CITED2,BICC1,HMGA2,SLIT3,BCAS3,SIX1,NRXN3,FLRT2,DSP,PLK2,RARB,ZMIZ1,GATA4,DNAH5,ZFPM2,ANGPT1,COL14A1,HAS2,PPARA,FMNL3,PRKDC,ROBO1,T,SMOC2,PDPK1,IFT140,PKNOX1,FOXP4,MBD2,NSDHL,AKT3,ITGB8,ND…
GO:BP	cellular response to endogenous stimulus	GO:0071495	3.46163e-06	5.46072	1474	1508	136	27543	CPS1,ERBB4,IGFBP5,ARPC2,VIL1,EPHA4,OLFR16,PIP4K2A,ACVR2A,LRP2,NFE2L2,ITGA4,TFPI,SRC,GNAS,CYP7B1,FAT4,NOTCH2,ATP1A1,MUP5,SH3GL2,AKAP9,FZD1,HTR5A,EPHA5,CFTR,NTF3,SOX5,AKAP13,PRCP,INSR,EDNRA,VPS35,ZFP423,CNOT1,PDGFD,CD109,CITED2,ENPP1,ARG1,AKAP7,WASF1,CRY1,ATP2B1,LGR5,HMGA2,SLIT3,GLRA1,ACACA,BCAS3,SIX1,FLRT2,GCNT2,HTR1A,PDE4D,RARB,ZMIZ1,GATA4,HAS2,CSNK1E,PPARA,PRKDC,FSTL1,HTR1F,APP,ARID1B,EZR,SMOC2,…
GO:BP	phosphorylation	GO:0016310	3.5209e-06	5.45335	1936	1508	168	27543	STK17B,PLCL1,ERBB4,EPHA4,CAB39,DUSP10,PROX1,RPS6KC1,PIP4K2A,MYO3A,ACVR2A,CERKL,DNAJC10,RASGRP1,SRC,GNAS,EDN3,EEF1A2,PMVK,PI4KB,PIP5K1A,ALPK1,LMO4,SH3GL2,CDK6,AKAP9,FZD1,CDK14,HGF,PRKAG2,STK32B,LIMCH1,TEC,EPHA5,FZD10,PHKG1,RABGEF1,BAZ1B,AGK,EIF2AK3,CLEC4N,NTF3,AKAP13,SBK1,INSR,RBPMS,EDNRA,MYLK3,PDGFD,ANXA2,CCNB2,CD109,ULK4,SASH1,TNFAIP3,MAP3K5,ENPP1,FRK,IPMK,BCR,ADORA2A,CRY1,FBXO7,HMGA2,CMPK2,ADCK…
GO:BP	cell-cell adhesion	GO:0098609	3.72012e-06	5.42944	887	1508	93	27543	CRB1,HMCN1,ASTN1,DUSP10,IL2RA,ITGA4,RASGRP1,JAG1,SRC,GNAS,CDH26,FAT4,SLC7A11,ANXA9,CD160,CD2,ASTN2,ADGRL3,SLC7A1,MMRN1,MAGI1,TENM4,UNC5D,CNTN5,FAT3,KIRREL3,CADM1,ITGA9,CITED2,PERP,TNFAIP3,ARG1,ANK3,PCDH15,ADORA2A,PAWR,DSP,GCNT2,ADGRV1,PDE4D,ZMIZ1,PCDH17,PCDH9,SLITRK1,CDH10,CDH12,HAS2,PPARA,LPP,STFA1,IGSF11,CD200R1,ALCAM,ROBO1,EZR,TNFRSF21,TWSG1,DCC,SOCS6,TENM1,PLXNB3,VSIG4,RAP2B,SLC4A1,CDH20,KIF2…
GO:BP	cytoskeleton organization	GO:0007010	5.00217e-06	5.30084	1440	1508	133	27543	TMEFF2,ARPC2,VIL1,HMCN1,PROX1,MSRB2,XIRP2,SRC,TCHH,PIP5K1A,PDE4DIP,NOTCH2,SPAG17,MYOZ2,UGT8A,ANK2,AKAP9,CFAP69,CRMP1,LIMCH1,EPHA5,FZD10,AUTS2,CAPZA2,ALMS1,NTF3,AKAP13,DOCK1,CLN8,DCTN6,SORBS2,ARHGAP10,MYLK3,CCNB2,CGNL1,ULK4,TNFAIP3,MAP7,ARHGAP18,WASF1,ANK3,PCDH15,BCR,PAWR,NAV3,BCAS3,CNTNAP1,DAAM1,SIPA1L1,DNAL1,ELMO1,DSP,HTR1A,PLK2,DIAPH3,DNAH5,TWF1,FMNL3,EZR,DAAM2,EPB41L3,CRIPT,DPYSL3,ABLIM3,PGM5,…
GO:BP	positive regulation of synapse assembly	GO:0051965	6.04895e-06	5.21832	75	1508	20	27543	ADGRL3,LRRTM4,TPBG,FLRT2,SLITRK1,SLITRK6,UBE2V2,CBLN2,SYNDIG1,SLITRK3,PTPRD,GRID2,NTRK2,IL1RAP,EFNA5,NRXN1,BHLHB9,PIK3R1,EEF2K,LINGO2
GO:BP	regulation of RNA metabolic process	GO:0051252	6.4367e-06	5.19134	3783	1508	287	27543	ST18,EYA1,SF3B1,BOLL,HSFY2,SATB2,ERBB4,ZFP142,MDM4,PROX1,ANGEL2,ACVR2A,NFE2L2,NEUROD1,NUP35,JAG1,SRC,GNAS,NELFCD,ZFP931,ZFHX4,YTHDF3,BBS7,MAML3,SETDB1,ARNT,OTUD7B,SF3B4,BCL9,NOTCH2,TBX15,PTBP2,MYOZ2,LMO4,WWP1,MUP5,KDM4C,BNC2,SSBP3,PHC2,ZFP362,KHDRBS1,PRAMEL5,CDK6,MTERF1B,FZD1,CDK14,DMTF1,EPHA5,TCHP,SFSWAP,AUTS2,BAZ1B,MDFIC,ZC3HAV1,NOBOX,KRBA1,EIF2AK3,FOXI3,SHQ1,LMCD1,VGLL4,NTF3,ETV6,SOX5,ARNTL2,Z…
GO:BP	nitrogen compound transport	GO:0071705	6.44056e-06	5.19108	2026	1508	173	27543	OPRK1,PGAP1,RFTN2,ARPC2,SEC16B,LRP2,MTX2,NEUROD1,NUP35,SPG11,SRC,EDN3,BBS7,SLC7A11,UBE2Q1,CHTOP,ENSA,VPS45,GJA5,SEC22B,SNX7,ANK2,SLC7A13,MUP5,ASTN2,KHDRBS1,PEX1,SRP72,EPHA5,SLC15A4,RABGEF1,SLC7A1,MDFIC,CFTR,CADPS2,EXOC4,AGK,EXOC6B,RAB11FIP5,NUP210,EDEM1,GRM7,CCDC91,AP2S1,SLC1A5,SERGEF,SLC28A1,XPO6,STX1B,SYT8,CLN8,EDNRA,VPS35,SNX19,STX7,ARG1,ANK3,BCR,ADORA2A,FBXO7,RAB21,GRIP1,HMGA2,KIF5A,EIF4ENIF1…
GO:BP	protein localization	GO:0008104	6.89372e-06	5.16155	2493	1508	204	27543	PGAP1,ERBB4,ARPC2,VIL1,DNAJB2,DPP10,CRB1,SEC16B,GPR158,LRP2,MTX2,ITGA4,NEUROD1,NUP35,SPG11,SRC,BBS7,SLC7A11,UBE2Q1,PIP5K1A,ENSA,VPS45,OTUD7B,GJA5,SEC22B,SNX7,UGT8A,ANK2,MUP5,ASTN2,PEX1,DPP6,KCNIP4,SRP72,EPHA5,SLC15A4,RABGEF1,MDFIC,CFTR,CADPS2,EXOC4,AGK,LRRTM4,EXOC6B,RAB11FIP5,NUP210,EDEM1,CCDC91,AP2S1,SERGEF,XPO6,STX1B,WRN,SORBS2,EDNRA,VPS35,ZFP423,SNX19,ANXA2,CGNL1,TPBG,SYNE1,TNFAIP3,STX7,AKAP7,…
GO:BP	cell morphogenesis involved in differentiation	GO:0000904	9.74516e-06	5.01121	786	1508	84	27543	TMEFF2,HECW2,ARPC2,EPHA4,PROX1,LAMB3,LRP2,ITGA4,SPG11,BTBD3,SRC,PREX1,EDN3,SEMA3D,CRMP1,EPHA5,AUTS2,NTF3,DOCK1,UNC5D,EDNRA,CNTN5,FAT3,TPBG,LAMA2,ANK3,PCDH15,RAB21,GRIP1,KIF5A,SLIT3,CNTNAP1,ETV1,SIPA1L1,FLRT2,HECW1,SLITRK1,SLITRK6,HAS2,PRKDC,ST6GAL1,ALCAM,ROBO1,ROBO2,APP,TIAM2,WDR36,DCC,CASK,FGF13,PLXNB3,DCX,TRPC5,MFSD2A,ARHGEF26,BMPR2,TNN,USH2A,MIR205,TTL,SLITRK3,UNC5C,BMPR1B,PTPRD,RILPL1,TMEM106…
GO:BP	regulation of cellular component biogenesis	GO:0044087	1.1824e-05	4.92723	988	1508	99	27543	TMEFF2,ARPC2,VIL1,DNAJB2,PIP4K2A,SRC,PDE4DIP,SEC22B,PLPPR5,SNX7,LMO4,AKAP9,FZD1,LIMCH1,ADGRL3,TCHP,AUTS2,CAPZA2,LRRTM4,ALMS1,SHQ1,CRBN,STX1B,VPS35,CNOT1,CGNL1,TPBG,SYNE1,L3MBTL3,ARHGAP18,NAV3,BBS10,BCAS3,TRAPPC12,STXBP6,SIX1,SIPA1L1,FLRT2,TCL1,MAK,PLK2,SACS,SLITRK1,SLITRK6,HAS2,TWF1,UBE2V2,APP,EZR,IFT140,DAAM2,DPYSL3,CBLN2,ADD3,PLXNB3,ARHGAP6,XRCC5,SDCCAG8,NAPB,SYNDIG1,ARHGAP40,PPP1R16B,STMN2,PFN…
GO:BP	actin filament-based process	GO:0030029	1.23248e-05	4.90922	803	1508	85	27543	TMEFF2,ARPC2,VIL1,HMCN1,PROX1,MSRB2,XIRP2,SRC,PIP5K1A,GJA5,NOTCH2,ATP1A1,MYOZ2,ANK2,AKAP9,LIMCH1,EPHA5,FZD10,AUTS2,CAPZA2,ALMS1,NTF3,AKAP13,DOCK1,SORBS2,MYLK3,CGNL1,ARHGAP18,WASF1,PCDH15,BCR,PAWR,BCAS3,DAAM1,SIPA1L1,ELMO1,DSP,PDE4D,GATA4,DIAPH3,TWF1,FMNL3,EZR,DAAM2,EPB41L3,DPYSL3,ABLIM3,PGM5,ADD3,FGF13,NRK,FRMPD4,ARHGAP6,ATP1A2,CDC42BPA,CAP1,RGS4,DSTN,ARHGAP40,PFN2,GRHL3,SSH1,MYO1H,MET,ARHGAP17,A…
GO:BP	tube morphogenesis	GO:0035239	1.27084e-05	4.89591	909	1508	93	27543	EYA1,CXCR2,EPHA4,OLFR16,PROX1,LRP2,NFE2L2,JAG1,SRC,CTSZ,FAT4,TIPARP,CD160,GJA5,NOTCH2,WARS2,LMO4,FZD1,HGF,EIF2AK3,PRCP,EDNRA,RORA,ANXA2,MTHFD1L,SASH1,CITED2,IPMK,LGR5,HMGA2,BCAS3,SIX1,NRXN3,IRX1,PLK2,ZMIZ1,GATA4,ZFPM2,ANGPT1,HAS2,FMNL3,ETV5,ROBO1,T,SMOC2,PDPK1,PKNOX1,FOXP4,AKT3,ITGB8,BMPR2,TNN,SDCCAG8,KIF26B,TGM2,PPP1R16B,AGTR1B,ZC3H12A,GRHL3,MYO18B,KCTD10,MET,PROK2,CXCL12,PRKCB,TCF21,HEY2,PRDM1,…
GO:BP	skeletal system development	GO:0001501	1.27831e-05	4.89336	538	1508	64	27543	EYA1,SATB2,PIP4K2A,ETL4,ACVR2A,FRZB,SRC,GNAS,FAT4,TIPARP,CTSK,GJA5,NOTCH2,TBX15,COL11A1,MMP16,BNC2,SOX5,AKAP13,VKORC1,CSGALNACT1,EDNRA,SNX19,CADM1,MTHFD1L,CITED2,HMGA2,SIX1,FOXN3,RARB,TRPS1,HAS2,T,IFT140,CBS,ITGB8,BMPR2,TNN,RABGAP1L,TGM2,BMPR1B,BMP8B,PAX7,GJA1,CTC1,MYCN,JAG2,MSX2,MEF2C,HAPLN1,HEXB,GHR,PTGER4,SPEF2,ADAMTS12,RSPO2,EXT1,SNAI2,CCDC154,FBN2,DMRT2,PLS3,CHD7,COL2A1
GO:BP	signal release	GO:0023061	1.32711e-05	4.87709	563	1508	66	27543	OPRK1,PLA2G4A,ACVR2A,LRP2,NEUROD1,GNAS,EDN3,UBE2Q1,ENSA,GJA5,MUP5,EPHA5,CFTR,CADPS2,GRM8,RAB11FIP5,GRM7,STX1B,SYT8,VPS35,SNX19,ADORA2A,CRY1,SYN3,HMGA2,NRXN3,MCTP1,HTR1A,ERC2,ADCYAP1,CASK,SLC16A2,HTR2C,PPT1,TRPA1,INHBB,SYT13,NAPB,KCNB1,PFN2,SUCNR1,P2RY1,LYN,GIT2,CXCL12,ERC1,MCTP2,PRKCB,GJA1,RPH3AL,PTPRN2,INHBA,NTRK2,MEF2C,PDE8B,HMGCR,PTGER4,ADCY5,EFNA5,PRKCE,NRXN1,GALR1,RFX3,CHD7,SELENOT,F2RL1
GO:BP	negative regulation of response to stimulus	GO:0048585	1.42479e-05	4.84625	1608	1508	143	27543	EYA1,IGFBP5,EPHA4,MDM4,RGS7,DUSP10,IL2RA,PIP4K2A,LRP2,NFE2L2,NEUROD1,FRZB,TFPI,SRC,YTHDF3,CYP7B1,PGLYRP4,PGLYRP3,OTUD7B,RNF115,CD160,MYOZ2,MUP5,RGS3,FZD1,SEMA3D,HGF,RABGEF1,MMRN1,VGLL4,PGLYRP1,VPS35,CNOT1,TLE3,RORA,ANXA2,CGNL1,CD109,TPBG,RASA2,TNFAIP3,EYA4,ENPP1,ARG1,BICC1,BCR,ADORA2A,CRY1,FBXO7,PAWR,TSPAN8,HMGA2,SLIT3,SHISA6,PAK1IP1,SLC6A3,NKD2,MCTP1,PDE4D,GATA4,CPB2,CSNK1E,PPARA,FAIM2,TRAP1,181…
GO:BP	response to stimulus	GO:0050896	1.48737e-05	4.82758	10393	1508	675	27543	OPRK1,ST18,EYA1,DEFB41,TMEFF2,STK17B,RFTN2,PLCL1,SATB2,CRYGF,CPS1,ERBB4,ATIC,IGFBP5,CXCR2,CXCR1,ARPC2,VIL1,DNAJB2,EPHA4,DNER,CAB39,SLC41A1,MDM4,CRB1,BRINP3,PLA2G4A,HMCN1,EDEM3,OLFR16,RGS7,DUSP10,PROX1,DTL,IL2RA,PIP4K2A,MSRB2,GPR158,MYO3A,OLFR342,ACVR2A,KCNJ3,CERS6,LRP2,NFE2L2,ITGA4,NEUROD1,PPP1R1C,PDE1A,DNAJC10,FRZB,NUP35,TFPI,RASGRP1,JAG1,MACROD2,SRC,PREX1,DOK5,GNAS,EDN3,YTHDF3,CYP7B1,PDE7A,BBS7…
GO:BP	regulation of nucleobase-containing compound metabolic process	GO:0019219	1.51605e-05	4.81929	4088	1508	304	27543	ST18,EYA1,SF3B1,BOLL,HSFY2,SATB2,ERBB4,USP37,ZFP142,MDM4,PROX1,ANGEL2,ACVR2A,NFE2L2,NEUROD1,NUP35,JAG1,SRC,GNAS,NELFCD,ZFP931,ZFHX4,YTHDF3,BBS7,MAML3,SETDB1,ARNT,OTUD7B,SF3B4,BCL9,NOTCH2,TBX15,PTBP2,MYOZ2,LMO4,WWP1,ORC3,MUP5,KDM4C,BNC2,SSBP3,PHC2,ZFP362,KHDRBS1,PRAMEL5,CDK6,MTERF1B,FZD1,CDK14,DMTF1,HGF,PRKAG2,EPHA5,PARM1,TCHP,SLC15A4,SFSWAP,AUTS2,BAZ1B,MDFIC,ZC3HAV1,NOBOX,KRBA1,EIF2AK3,FOXI3,SHQ1…
GO:BP	regulation of plasma membrane bounded cell projection organization	GO:0120035	1.52887e-05	4.81563	716	1508	78	27543	HECW2,ARPC2,VIL1,EPHA4,NFE2L2,ZFP804A,SRC,CTSZ,PLPPR5,FZD1,SEMA3D,HGF,CRMP1,TCHP,AUTS2,STX1B,VPS35,FAT3,NTM,ULK4,SYNE1,FBXO7,RAB21,BCAS3,SIPA1L1,HECW1,MAK,SLITRK1,TWF1,UBE2V2,ROBO1,APP,TIAM2,EZR,IFT140,DAAM2,ADCYAP1,RIT2,DPYSL3,DCC,CASK,FGF13,PLXNB3,DCX,TRPC5,MFSD2A,BMPR2,TNN,SDCCAG8,MARK1,PPP1R16B,STMN2,PFN2,LYN,PTPRD,AKIRIN1,TMEM106B,PTPRZ1,GRID2,CXCL12,ANLN,PMP22,CRK,TANC2,SPOCK1,NTRK2,ARSB,SE…
GO:BP	plasma membrane bounded cell projection morphogenesis	GO:0120039	1.5861e-05	4.79967	691	1508	76	27543	HECW2,VIL1,EPHA4,LRP2,ITGA4,SPG11,BTBD3,SRC,EDN3,UGT8A,SH3GL2,SEMA3D,CRMP1,EPHA5,AUTS2,NTF3,UNC5D,EDNRA,CNTN5,KIRREL3,TPBG,LAMA2,WASF1,ANK3,ADORA2A,RAB21,GRIP1,KIF5A,SLIT3,CNTNAP1,ETV1,SIPA1L1,FLRT2,HECW1,SLITRK1,SLITRK6,ALCAM,ROBO1,ROBO2,APP,TIAM2,EPB41L3,WDR36,DCC,CASK,FGF13,PLXNB3,NRK,DCX,TRPC5,MFSD2A,BMPR2,TNN,TTL,SLITRK3,UNC5C,BMPR1B,PTPRD,TMEM106B,PTPRZ1,CXCL12,GJA1,TAOK1,ETV4,TANC2,NTRK2,M…
GO:BP	tissue morphogenesis	GO:0048729	1.5959e-05	4.79699	653	1508	73	27543	EYA1,TMEFF2,ERBB4,IGFBP5,CXCR2,EPHA4,MDM4,PROX1,XIRP2,LRP2,FRZB,JAG1,SRC,CTSZ,CYP7B1,FAT4,NOTCH2,COL11A1,LMO4,ASTN2,FZD1,HGF,EXOC4,ALMS1,EDNRA,SALL1,GCNT3,MTHFD1L,CITED2,IPMK,PCDH15,LGR5,HMGA2,SIX1,DSP,IRX1,GATA4,ZFPM2,ANGPT1,ETV5,T,TWSG1,BMPR2,KIF26B,TGM2,AGTR1B,FREM2,GRHL3,PAX7,MET,CXCL12,SCNN1B,TCF21,HEY2,GJA1,ETV4,MYCN,HECTD1,JAG2,INHBA,MSX2,MEF2C,GCNT4,ADAMTS12,RSPO2,EXT1,SNAI2,SOS1,ZIC3,ENA…
GO:BP	establishment of protein localization	GO:0045184	1.73887e-05	4.75973	1671	1508	147	27543	PGAP1,ARPC2,SEC16B,LRP2,MTX2,NEUROD1,NUP35,SPG11,SRC,BBS7,SLC7A11,UBE2Q1,ENSA,VPS45,GJA5,SEC22B,SNX7,ANK2,MUP5,ASTN2,PEX1,SRP72,EPHA5,SLC15A4,RABGEF1,MDFIC,CFTR,CADPS2,EXOC4,AGK,EXOC6B,RAB11FIP5,NUP210,EDEM1,CCDC91,AP2S1,SERGEF,XPO6,STX1B,EDNRA,VPS35,SNX19,TNFAIP3,STX7,ANK3,BCR,ADORA2A,FBXO7,RAB21,GRIP1,KIF5A,EIF4ENIF1,POM121L12,BCAS3,TMED10,VIPAS39,SEL1L,CLTB,ZDHHC11,ADGRV1,TMEM167,TNPO1,AP3M1,S…
GO:BP	regulation of cell projection organization	GO:0031344	1.85222e-05	4.73231	732	1508	79	27543	HECW2,ARPC2,VIL1,EPHA4,NFE2L2,ZFP804A,SRC,CTSZ,PLPPR5,FZD1,SEMA3D,HGF,CRMP1,TCHP,AUTS2,STX1B,VPS35,FAT3,NTM,ULK4,SYNE1,FBXO7,RAB21,GRIP1,BCAS3,SIPA1L1,HECW1,MAK,SLITRK1,TWF1,UBE2V2,ROBO1,APP,TIAM2,EZR,IFT140,DAAM2,ADCYAP1,RIT2,DPYSL3,DCC,CASK,FGF13,PLXNB3,DCX,TRPC5,MFSD2A,BMPR2,TNN,SDCCAG8,MARK1,PPP1R16B,STMN2,PFN2,LYN,PTPRD,AKIRIN1,TMEM106B,PTPRZ1,GRID2,CXCL12,ANLN,PMP22,CRK,TANC2,SPOCK1,NTRK2,A…
GO:BP	positive regulation of cellular component organization	GO:0051130	2.01854e-05	4.69496	1149	1508	110	27543	ARPC2,VIL1,EPHA4,PLA2G4A,PROX1,PIP4K2A,LRP2,NFE2L2,ZFP804A,SRC,EDN3,FCGR1,PDE4DIP,PLPPR5,SNX7,SH3GL2,SGIP1,AKAP9,FZD1,HGF,LIMCH1,ADGRL3,AUTS2,LRRTM4,CRBN,NTF3,INSR,VPS35,MYLK3,CNOT1,ANXA2,TPBG,WASF1,FBXO7,NAV3,RAB21,GRIP1,ABCA13,BCAS3,ADCK1,FLRT2,TCL1,HTR1A,CPB2,SLITRK1,SLITRK6,ANGPT1,TWF1,UBE2V2,ROBO1,APP,TIAM2,ADCYAP1,RIT2,DPYSL3,DCC,CBLN2,ADD3,CASK,PLXNB3,DCX,TRPC5,FRMPD4,PPT1,BMPR2,XRCC5,TNN,…
GO:BP	cell projection morphogenesis	GO:0048858	2.16781e-05	4.66398	696	1508	76	27543	HECW2,VIL1,EPHA4,LRP2,ITGA4,SPG11,BTBD3,SRC,EDN3,UGT8A,SH3GL2,SEMA3D,CRMP1,EPHA5,AUTS2,NTF3,UNC5D,EDNRA,CNTN5,KIRREL3,TPBG,LAMA2,WASF1,ANK3,ADORA2A,RAB21,GRIP1,KIF5A,SLIT3,CNTNAP1,ETV1,SIPA1L1,FLRT2,HECW1,SLITRK1,SLITRK6,ALCAM,ROBO1,ROBO2,APP,TIAM2,EPB41L3,WDR36,DCC,CASK,FGF13,PLXNB3,NRK,DCX,TRPC5,MFSD2A,BMPR2,TNN,TTL,SLITRK3,UNC5C,BMPR1B,PTPRD,TMEM106B,PTPRZ1,CXCL12,GJA1,TAOK1,ETV4,TANC2,NTRK2,M…
GO:BP	neuron projection morphogenesis	GO:0048812	3.07095e-05	4.51273	676	1508	74	27543	HECW2,EPHA4,LRP2,ITGA4,SPG11,BTBD3,EDN3,UGT8A,SH3GL2,SEMA3D,CRMP1,EPHA5,AUTS2,NTF3,UNC5D,EDNRA,CNTN5,KIRREL3,TPBG,LAMA2,WASF1,ANK3,ADORA2A,RAB21,GRIP1,KIF5A,SLIT3,CNTNAP1,ETV1,SIPA1L1,FLRT2,HECW1,SLITRK1,SLITRK6,ALCAM,ROBO1,ROBO2,APP,TIAM2,EPB41L3,WDR36,DCC,CASK,FGF13,PLXNB3,NRK,DCX,TRPC5,MFSD2A,BMPR2,TNN,TTL,SLITRK3,UNC5C,BMPR1B,PTPRD,TMEM106B,PTPRZ1,CXCL12,GJA1,TAOK1,ETV4,TANC2,NTRK2,MEF2C,MIR9…
GO:BP	positive regulation of RNA metabolic process	GO:0051254	3.48382e-05	4.45794	1836	1508	157	27543	ST18,EYA1,SF3B1,SATB2,ERBB4,ZFP142,PROX1,ACVR2A,NFE2L2,NEUROD1,JAG1,SRC,YTHDF3,MAML3,ARNT,SF3B4,BCL9,LMO4,SSBP3,FZD1,DMTF1,AUTS2,BAZ1B,MDFIC,ZC3HAV1,NOBOX,EIF2AK3,NTF3,ETV6,ARNTL2,TEAD1,ZFP668,KAT8,INSR,RBPMS,ZFP423,SALL1,CNOT1,RORA,ICE2,ANXA2,MYO6,PLAGL1,CITED2,MAP3K5,TFAM,HMGA2,EIF4ENIF1,BCAS3,MYT1L,ETV1,SIX1,KLF6,HEATR1,PRL7B1,MAK,GCM2,GPBP1,RARB,ZMIZ1,GATA4,TSC22D1,TDRD3,ZFPM2,GTPBP1,PPARA,SL…
GO:BP	signal transduction	GO:0007165	3.61034e-05	4.44245	6896	1508	471	27543	OPRK1,ST18,EYA1,STK17B,PLCL1,ERBB4,IGFBP5,CXCR2,CXCR1,ARPC2,VIL1,EPHA4,DNER,CAB39,MDM4,OLFR16,RGS7,DUSP10,PROX1,DTL,IL2RA,PIP4K2A,GPR158,OLFR342,ACVR2A,LRP2,NFE2L2,ITGA4,NEUROD1,PPP1R1C,PDE1A,DNAJC10,FRZB,RASGRP1,JAG1,SRC,PREX1,DOK5,GNAS,EDN3,YTHDF3,CYP7B1,PDE7A,BBS7,FAT4,MAML3,TIPARP,TUFT1,PI4KB,ARNT,OTUD7B,FCGR1,RNF115,CD160,BCL9,NOTCH2,OLFM3,PLPPR5,MYOZ2,ANK2,ALPK1,MUP5,RGS3,SLC24A2,EIF2B3,KHD…
GO:BP	macromolecule biosynthetic process	GO:0009059	4.20983e-05	4.37574	4797	1508	345	27543	ST18,EYA1,TMEFF2,PGAP1,SF3B1,BOLL,HSFY2,SATB2,ERBB4,IGFBP5,ZFP142,MDM4,EDEM3,PROX1,DTL,ACVR2A,NFE2L2,NEUROD1,NUP35,JAG1,SRC,GNAS,NELFCD,ZFP931,EEF1A2,ZFHX4,MRPS28,YTHDF3,BBS7,MAML3,SETDB1,ARNT,OTUD7B,BCL9,NOTCH2,WARS2,TBX15,TTF2,AGL,MYOZ2,LMO4,WWP1,MUP5,KDM4C,BNC2,SSBP3,EIF2B3,PHC2,ZFP362,KHDRBS1,PRAMEL5,CDK6,MTERF1B,FZD1,CDK14,DMTF1,HGF,HS3ST1,CWH43,EPHA5,PARM1,TCHP,PHKG1,AUTS2,BAZ1B,CHST12,MDFI…
GO:BP	aromatic compound biosynthetic process	GO:0019438	4.35845e-05	4.36067	4050	1508	299	27543	ST18,EYA1,SF3B1,HSFY2,SATB2,ERBB4,ATIC,ZFP142,MDM4,PROX1,DTL,ACVR2A,NFE2L2,NEUROD1,NUP35,JAG1,SRC,GNAS,NELFCD,ATP5E,ZFP931,ZFHX4,BBS7,SLC7A11,MAML3,SETDB1,ARNT,OTUD7B,BCL9,NOTCH2,TBX15,TTF2,MYOZ2,LMO4,WWP1,MUP5,KDM4C,BNC2,SSBP3,PHC2,ZFP362,KHDRBS1,PRAMEL5,CDK6,MTERF1B,FZD1,CDK14,DMTF1,HGF,PAICS,EPHA5,PARM1,TCHP,AUTS2,BAZ1B,MDFIC,NOBOX,KRBA1,EIF2AK3,FOXI3,LMCD1,VGLL4,NTF3,ETV6,SOX5,ARNTL2,ZFP110,T…
GO:BP	protein phosphorylation	GO:0006468	5.14856e-05	4.28831	1641	1508	143	27543	STK17B,PLCL1,ERBB4,EPHA4,CAB39,DUSP10,PROX1,RPS6KC1,MYO3A,ACVR2A,DNAJC10,RASGRP1,SRC,GNAS,EDN3,ALPK1,SH3GL2,CDK6,AKAP9,FZD1,CDK14,HGF,PRKAG2,STK32B,LIMCH1,TEC,EPHA5,FZD10,PHKG1,RABGEF1,BAZ1B,EIF2AK3,CLEC4N,NTF3,AKAP13,SBK1,INSR,RBPMS,EDNRA,MYLK3,PDGFD,ANXA2,CCNB2,CD109,ULK4,SASH1,TNFAIP3,MAP3K5,ENPP1,FRK,BCR,ADORA2A,CRY1,FBXO7,HMGA2,ADCK1,TCL1,MAK,PDE4D,PLK2,GATA4,ANGPT1,CSNK1E,TWF1,PRKDC,ROBO1,A…
GO:BP	response to endogenous stimulus	GO:0009719	5.53783e-05	4.25666	1775	1508	152	27543	OPRK1,CPS1,ERBB4,IGFBP5,ARPC2,VIL1,EPHA4,CAB39,OLFR16,PIP4K2A,ACVR2A,LRP2,NFE2L2,ITGA4,TFPI,SRC,GNAS,CYP7B1,FAT4,NOTCH2,HSD3B1,ATP1A1,AGL,MUP5,SH3GL2,EIF2B3,AKAP9,FZD1,HTR5A,EPHA5,CFTR,NTF3,SOX5,AKAP13,PRCP,INSR,EDNRA,VPS35,ZFP423,CNOT1,PDGFD,CD109,CITED2,ENPP1,ARG1,AKAP7,WASF1,CRY1,ATP2B1,LGR5,HMGA2,SLIT3,GLRA1,ACACA,BCAS3,SIX1,FLRT2,SERPINA3I,GCNT2,HTR1A,PDE4D,RARB,ZMIZ1,GATA4,HAS2,CSNK1E,PPARA…
GO:BP	positive regulation of nucleic acid-templated transcription	GO:1903508	5.78919e-05	4.23738	1688	1508	146	27543	ST18,EYA1,SF3B1,SATB2,ERBB4,ZFP142,PROX1,ACVR2A,NFE2L2,NEUROD1,JAG1,SRC,MAML3,ARNT,BCL9,LMO4,SSBP3,FZD1,DMTF1,AUTS2,BAZ1B,MDFIC,NOBOX,EIF2AK3,NTF3,ETV6,ARNTL2,TEAD1,ZFP668,KAT8,INSR,RBPMS,ZFP423,SALL1,RORA,ICE2,ANXA2,MYO6,PLAGL1,CITED2,MAP3K5,TFAM,HMGA2,BCAS3,MYT1L,ETV1,SIX1,KLF6,HEATR1,PRL7B1,MAK,GCM2,GPBP1,RARB,ZMIZ1,GATA4,TSC22D1,TDRD3,ZFPM2,PPARA,PRKDC,ETV5,APP,ARID1B,T,RGMB,PKNOX1,ADCYAP1,AS…
GO:BP	positive regulation of transcription, DNA-templated	GO:0045893	5.78919e-05	4.23738	1688	1508	146	27543	ST18,EYA1,SF3B1,SATB2,ERBB4,ZFP142,PROX1,ACVR2A,NFE2L2,NEUROD1,JAG1,SRC,MAML3,ARNT,BCL9,LMO4,SSBP3,FZD1,DMTF1,AUTS2,BAZ1B,MDFIC,NOBOX,EIF2AK3,NTF3,ETV6,ARNTL2,TEAD1,ZFP668,KAT8,INSR,RBPMS,ZFP423,SALL1,RORA,ICE2,ANXA2,MYO6,PLAGL1,CITED2,MAP3K5,TFAM,HMGA2,BCAS3,MYT1L,ETV1,SIX1,KLF6,HEATR1,PRL7B1,MAK,GCM2,GPBP1,RARB,ZMIZ1,GATA4,TSC22D1,TDRD3,ZFPM2,PPARA,PRKDC,ETV5,APP,ARID1B,T,RGMB,PKNOX1,ADCYAP1,AS…
GO:BP	cell part morphogenesis	GO:0032990	6.06955e-05	4.21684	726	1508	77	27543	HECW2,VIL1,EPHA4,LRP2,ITGA4,SPG11,BTBD3,SRC,EDN3,UGT8A,MUP5,SH3GL2,SEMA3D,CRMP1,EPHA5,AUTS2,NTF3,UNC5D,EDNRA,CNTN5,KIRREL3,TPBG,LAMA2,WASF1,ANK3,ADORA2A,RAB21,GRIP1,KIF5A,SLIT3,CNTNAP1,ETV1,SIPA1L1,FLRT2,HECW1,SLITRK1,SLITRK6,ALCAM,ROBO1,ROBO2,APP,TIAM2,EPB41L3,WDR36,DCC,CASK,FGF13,PLXNB3,NRK,DCX,TRPC5,MFSD2A,BMPR2,TNN,TTL,SLITRK3,UNC5C,BMPR1B,PTPRD,TMEM106B,PTPRZ1,CXCL12,GJA1,TAOK1,ETV4,TANC2,NT…
GO:BP	cellular component morphogenesis	GO:0032989	7.13702e-05	4.14648	821	1508	84	27543	HECW2,VIL1,EPHA4,PROX1,LRP2,ITGA4,SPG11,BTBD3,SRC,EDN3,MYOZ2,UGT8A,ANK2,MUP5,SH3GL2,SEMA3D,CRMP1,EPHA5,AUTS2,NTF3,AKAP13,TENM4,UNC5D,EDNRA,MYLK3,CNTN5,KIRREL3,TPBG,LAMA2,WASF1,ANK3,ADORA2A,RAB21,GRIP1,KIF5A,SLIT3,CNTNAP1,ETV1,SIPA1L1,FLRT2,HECW1,SLITRK1,SLITRK6,ALCAM,ROBO1,ROBO2,APP,TIAM2,EPB41L3,WDR36,DCC,PGM5,CASK,FGF13,PLXNB3,NRK,DCX,TRPC5,MFSD2A,BMPR2,TNN,TTL,SLITRK3,UNC5C,BMPR1B,PTPRD,TMEM10…
GO:BP	positive regulation of RNA biosynthetic process	GO:1902680	7.23116e-05	4.14079	1694	1508	146	27543	ST18,EYA1,SF3B1,SATB2,ERBB4,ZFP142,PROX1,ACVR2A,NFE2L2,NEUROD1,JAG1,SRC,MAML3,ARNT,BCL9,LMO4,SSBP3,FZD1,DMTF1,AUTS2,BAZ1B,MDFIC,NOBOX,EIF2AK3,NTF3,ETV6,ARNTL2,TEAD1,ZFP668,KAT8,INSR,RBPMS,ZFP423,SALL1,RORA,ICE2,ANXA2,MYO6,PLAGL1,CITED2,MAP3K5,TFAM,HMGA2,BCAS3,MYT1L,ETV1,SIX1,KLF6,HEATR1,PRL7B1,MAK,GCM2,GPBP1,RARB,ZMIZ1,GATA4,TSC22D1,TDRD3,ZFPM2,PPARA,PRKDC,ETV5,APP,ARID1B,T,RGMB,PKNOX1,ADCYAP1,AS…
GO:BP	regulation of synapse structure or activity	GO:0050803	7.24019e-05	4.14025	258	1508	38	27543	EPHA4,ZFP804A,SLC7A11,FZD1,ADGRL3,LRRTM4,STX1B,VPS35,CNTNAP4,TPBG,SIX1,SIPA1L1,FLRT2,SLITRK1,SLITRK6,UBE2V2,ETV5,APP,LRFN2,CRIPT,CBLN2,CASK,FRMPD4,SYNDIG1,SLITRK3,PTPRD,GRID2,TANC2,NTRK2,MEF2C,IL1RAP,EFNA5,NRXN1,BHLHB9,GPC6,PIK3R1,EEF2K,LINGO2
GO:BP	heart development	GO:0007507	7.30373e-05	4.13646	626	1508	69	27543	EYA1,ERBB4,MDM4,PROX1,XIRP2,LRP2,JAG1,BBS7,FAT4,GJA5,NOTCH2,COL11A1,ANK2,LMO4,FZD1,VGLL4,AKAP13,TENM4,INSR,SORBS2,EDNRA,MYLK3,SALL1,CITED2,BICC1,SLIT3,SIX1,FLRT2,DSP,RARB,ZMIZ1,GATA4,DNAH5,ZFPM2,ANGPT1,COL14A1,HAS2,PPARA,PRKDC,T,IFT140,FOXP4,MBD2,BMPR2,SPEG,RGS4,FREM2,VCAM1,MYO18B,ACACB,KCTD10,PROK2,DCTN5,HEY2,TRAF3IP2,PRDM1,GJA1,ERBB3,HECTD1,DNAH11,MSX2,MEF2C,EXT1,SNAI2,SOS1,ZIC3,CHD7,COL2A1,CCN…
GO:BP	regulation of catalytic activity	GO:0050790	7.38039e-05	4.13192	2278	1508	185	27543	ST18,ERBB4,VIL1,EPHA4,CAB39,RGS7,DUSP10,PROX1,PIP4K2A,ACVR2A,PPP1R1C,TFPI,RASGRP1,SRC,PREX1,GNAS,EDN3,EEF1A2,CHTOP,PIP5K1A,ANXA9,ENSA,ANP32E,LMO4,RGS3,EIF2B3,AKAP9,HGF,PRKAG2,EPHA5,PARM1,COX6A1,FZD10,RABGEF1,PPP1R17,GRM7,NTF3,SERGEF,AKAP13,DOCK1,INSR,WRN,ARHGAP10,CASP12,PDGFD,ANXA2,CCNB2,CD109,TBC1D2B,RASA2,SASH1,ECT2L,PERP,TNFAIP3,MAP3K5,ARHGAP18,BCR,ADORA2A,FBXO7,PAWR,LGR5,HMGA2,BCAS3,EGLN3,RAL…
GO:BP	regulation of system process	GO:0044057	7.77929e-05	4.10906	627	1508	69	27543	OPRK1,IGFBP5,SLC4A3,MDM4,ACVR2A,NEUROD1,SRC,GNAS,EDN3,FCGR1,GJA5,ATP1A1,ANK2,AKAP9,HGF,LMCD1,TENM4,STX1B,GLRX3,ISX,EDNRA,ADORA2A,CRY1,ATP2B1,PAWR,GLRA1,SHISA6,DSP,HTR1A,PDE4D,GATA4,PPARA,TWF1,SHISA9,IGSF11,APP,TNFRSF21,CELF4,ADD3,FGF13,HTR2C,ATP1A2,DLGAP4,TRPA1,BMPR2,INHBB,RGS4,AGTR1B,GPR171,ZC3H12A,SSH1,PROK2,HEY2,GJA1,CTNNA3,BECN1,SCN4A,DOCK4,INHBA,MEF2C,TMEM161B,HMGCR,PTGER4,NRXN1,GALR1,PIK3R1…
GO:BP	sensory organ development	GO:0007423	7.77929e-05	4.10906	627	1508	69	27543	EYA1,CRYGF,EPHA4,CRB1,PROX1,NEUROD1,FRZB,JAG1,BBS7,FAT4,SLC7A11,NOTCH2,COL11A1,OLFM3,BNC2,ALMS1,LRIG1,CLN8,TENM3,EDNRA,FAT3,CITED2,EYA4,PCDH15,BCR,ATP2B1,LGR5,SIX6,SIX1,SLC6A3,ADGRV1,RARB,SLITRK6,IFT140,PKNOX1,OPN5,TWSG1,CELF4,CHRDL1,DCX,NHS,MFSD2A,NDP,CTNS,BMPR2,INHBB,IFI204,USH2A,FREM2,BMPR1B,GRHL3,PRDM16,HEY2,PRDM1,GJA1,STAT3,NAGLU,MYCN,DIO3,JAG2,INHBA,NTRK2,ALG10B,SOS1,RAB18,FBN2,CHD7,ABCB5,C…
GO:BP	actin cytoskeleton organization	GO:0030036	8.14173e-05	4.08928	718	1508	76	27543	TMEFF2,ARPC2,VIL1,HMCN1,PROX1,MSRB2,XIRP2,SRC,PIP5K1A,NOTCH2,MYOZ2,LIMCH1,EPHA5,FZD10,AUTS2,CAPZA2,ALMS1,NTF3,AKAP13,DOCK1,SORBS2,MYLK3,CGNL1,ARHGAP18,WASF1,PCDH15,BCR,PAWR,BCAS3,DAAM1,SIPA1L1,ELMO1,DIAPH3,TWF1,FMNL3,EZR,DAAM2,EPB41L3,DPYSL3,ABLIM3,PGM5,ADD3,NRK,FRMPD4,ARHGAP6,CDC42BPA,CAP1,RGS4,DSTN,ARHGAP40,PFN2,GRHL3,SSH1,MYO1H,MET,ARHGAP17,ANLN,CTNNA3,SPTBN1,CRK,TAOK1,MEF2C,ZBED3,IQGAP2,PTGER…
GO:BP	organelle organization	GO:0006996	8.40708e-05	4.07536	3787	1508	281	27543	EYA1,TMEFF2,HECW2,SATB2,ERBB4,ARPC2,VIL1,PLA2G4A,HMCN1,SEC16B,PROX1,PIP4K2A,MSRB2,XIRP2,MTX2,TTC30A1,NUP35,SPG11,SRC,GNAS,EDN3,YTHDF3,ARMC1,BBS7,UBAP2L,TCHH,PI4KB,PIP5K1A,SETDB1,ANP32E,PDE4DIP,SEC22B,NOTCH2,SPAG17,TTF2,SNX7,MYOZ2,UGT8A,ANK2,ALPK1,MUP5,KDM4C,PEX1,AKAP9,CFAP69,HGF,CRMP1,LIMCH1,EPHA5,HFM1,TMEM175,TCHP,FZD10,AUTS2,BAZ1B,CAPZA2,AGK,ALMS1,NTF3,AKAP13,TMEM135,SETD1A,STX1B,KAT8,DOCK1,INS…
GO:BP	transcription, DNA-templated	GO:0006351	8.67033e-05	4.06196	3596	1508	269	27543	ST18,EYA1,SF3B1,HSFY2,SATB2,ERBB4,ZFP142,MDM4,PROX1,ACVR2A,NFE2L2,NEUROD1,NUP35,JAG1,SRC,GNAS,NELFCD,ZFP931,ZFHX4,BBS7,MAML3,SETDB1,ARNT,OTUD7B,BCL9,NOTCH2,TBX15,TTF2,MYOZ2,LMO4,WWP1,MUP5,KDM4C,BNC2,SSBP3,PHC2,ZFP362,KHDRBS1,PRAMEL5,CDK6,MTERF1B,FZD1,CDK14,DMTF1,EPHA5,TCHP,AUTS2,BAZ1B,MDFIC,NOBOX,KRBA1,EIF2AK3,FOXI3,LMCD1,VGLL4,NTF3,ETV6,SOX5,ARNTL2,ZFP110,TEAD1,ZFP668,KAT8,TCERG1L,INSR,RBPMS,GM1…
GO:BP	nucleic acid-templated transcription	GO:0097659	8.89224e-05	4.05099	3597	1508	269	27543	ST18,EYA1,SF3B1,HSFY2,SATB2,ERBB4,ZFP142,MDM4,PROX1,ACVR2A,NFE2L2,NEUROD1,NUP35,JAG1,SRC,GNAS,NELFCD,ZFP931,ZFHX4,BBS7,MAML3,SETDB1,ARNT,OTUD7B,BCL9,NOTCH2,TBX15,TTF2,MYOZ2,LMO4,WWP1,MUP5,KDM4C,BNC2,SSBP3,PHC2,ZFP362,KHDRBS1,PRAMEL5,CDK6,MTERF1B,FZD1,CDK14,DMTF1,EPHA5,TCHP,AUTS2,BAZ1B,MDFIC,NOBOX,KRBA1,EIF2AK3,FOXI3,LMCD1,VGLL4,NTF3,ETV6,SOX5,ARNTL2,ZFP110,TEAD1,ZFP668,KAT8,TCERG1L,INSR,RBPMS,GM1…
GO:BP	anatomical structure formation involved in morphogenesis	GO:0048646	9.12496e-05	4.03977	1182	1508	110	27543	EYA1,CXCR2,CRB1,OLFR16,PROX1,LAMB3,LRP2,NFE2L2,ITGA4,GNAS,CD160,GJA5,NOTCH2,WARS2,COL11A1,MYOZ2,UGT8A,ANK2,LMO4,KDM4C,SSBP3,FZD1,HGF,ENAM,CFTR,EXOC4,EIF2AK3,AKAP13,PRCP,TENM4,EDNRA,MYLK3,CNOT1,FAT3,RORA,ANXA2,CD109,MTHFD1L,SASH1,CITED2,PERP,TNFAIP3,IPMK,HMGA2,BCAS3,CNTNAP1,SIX1,NRXN3,IRX1,PLK2,GATA4,ZFPM2,ANGPT1,PPARA,FMNL3,FAIM2,PRKDC,ROBO1,ADAMTS5,T,SMOC2,PDPK1,PKNOX1,TWSG1,EPB41L3,PGM5,DCX,AKT…
GO:BP	protein transport	GO:0015031	9.84764e-05	4.00667	1556	1508	136	27543	PGAP1,ARPC2,SEC16B,LRP2,MTX2,NEUROD1,NUP35,SPG11,SRC,BBS7,SLC7A11,UBE2Q1,ENSA,VPS45,GJA5,SEC22B,SNX7,ANK2,MUP5,ASTN2,PEX1,SRP72,EPHA5,SLC15A4,RABGEF1,MDFIC,CFTR,CADPS2,EXOC4,AGK,EXOC6B,RAB11FIP5,NUP210,EDEM1,CCDC91,AP2S1,SERGEF,XPO6,STX1B,EDNRA,VPS35,SNX19,STX7,ANK3,BCR,ADORA2A,FBXO7,RAB21,GRIP1,KIF5A,EIF4ENIF1,POM121L12,BCAS3,TMED10,VIPAS39,SEL1L,CLTB,ZDHHC11,TMEM167,TNPO1,AP3M1,SIAH3,ANGPT1,FAM…
GO:BP	positive regulation of macromolecule biosynthetic process	GO:0010557	0.000101951	3.99161	1911	1508	160	27543	ST18,EYA1,SF3B1,BOLL,SATB2,ERBB4,ZFP142,PROX1,ACVR2A,NFE2L2,NEUROD1,JAG1,SRC,YTHDF3,MAML3,ARNT,BCL9,LMO4,SSBP3,KHDRBS1,FZD1,DMTF1,HGF,PARM1,AUTS2,BAZ1B,MDFIC,NOBOX,EIF2AK3,NTF3,ETV6,ARNTL2,TEAD1,ZFP668,KAT8,INSR,RBPMS,ZFP423,SALL1,RORA,ICE2,ANXA2,MYO6,PLAGL1,CITED2,MAP3K5,TFAM,PAWR,HMGA2,BCAS3,MYT1L,ETV1,SIX1,KLF6,HEATR1,PRL7B1,MAK,GCM2,GPBP1,RARB,ZMIZ1,GATA4,TSC22D1,TDRD3,ZFPM2,HAS2,PPARA,PRKDC,…
GO:BP	regulation of synapse organization	GO:0050807	0.000107381	3.96907	251	1508	37	27543	EPHA4,ZFP804A,SLC7A11,FZD1,ADGRL3,LRRTM4,VPS35,CNTNAP4,TPBG,SIX1,SIPA1L1,FLRT2,SLITRK1,SLITRK6,UBE2V2,ETV5,APP,LRFN2,CRIPT,CBLN2,CASK,FRMPD4,SYNDIG1,SLITRK3,PTPRD,GRID2,TANC2,NTRK2,MEF2C,IL1RAP,EFNA5,NRXN1,BHLHB9,GPC6,PIK3R1,EEF2K,LINGO2
GO:BP	negative regulation of cell communication	GO:0010648	0.000110297	3.95744	1371	1508	123	27543	OPRK1,EYA1,IGFBP5,EPHA4,MDM4,RGS7,DUSP10,PIP4K2A,LRP2,NFE2L2,NEUROD1,FRZB,SRC,EDN3,YTHDF3,CYP7B1,OTUD7B,RNF115,CD160,MYOZ2,MUP5,RGS3,SLC24A2,FZD1,HGF,RABGEF1,RAB11FIP5,VGLL4,CNOT1,TLE3,RORA,CGNL1,CD109,TPBG,RASA2,TNFAIP3,EYA4,ENPP1,ARG1,BICC1,CRY1,PAWR,HMGA2,SLIT3,GLRA1,GRIA1,SHISA6,PAK1IP1,NKD2,PDE4D,PLK2,GATA4,PCDH17,CSNK1E,PPARA,FAIM2,TRAP1,1810013L24RIK,ROBO1,APP,EZR,PDPK1,TWSG1,CELF4,MCC,SAL…
GO:BP	regulation of actin filament-based process	GO:0032970	0.000129406	3.88805	412	1508	51	27543	TMEFF2,ARPC2,VIL1,PROX1,GJA5,NOTCH2,ATP1A1,ANK2,AKAP9,LIMCH1,EPHA5,FZD10,CAPZA2,ALMS1,NTF3,AKAP13,MYLK3,CGNL1,ARHGAP18,WASF1,BCAS3,DSP,PDE4D,GATA4,TWF1,DAAM2,ADD3,FGF13,ARHGAP6,ATP1A2,RGS4,DSTN,ARHGAP40,PFN2,GRHL3,SSH1,MET,ARHGAP17,CTNNA3,SPTBN1,CRK,TAOK1,MEF2C,IQGAP2,PTGER4,EFNA5,PRKCE,SPTA1,PIK3R1,PYCARD,F2RL1
GO:BP	secretion by cell	GO:0032940	0.000129896	3.88641	886	1508	88	27543	OPRK1,PLA2G4A,ACVR2A,LRP2,NEUROD1,RASGRP1,GNAS,EDN3,UBE2Q1,ENSA,CD160,GJA5,MUP5,TXLNA,CLNK,EPHA5,RABGEF1,CFTR,CADPS2,GRM8,EXOC4,EXOC6B,RAB11FIP5,GRM7,SLC1A5,SERGEF,MRGPRA4,STX1B,SYT8,VPS35,SNX19,BCR,ADORA2A,CRY1,SYN3,RAB21,HMGA2,TMED10,NRXN3,SEL1L,NKD2,MCTP1,TMEM167,HTR1A,ERC2,CPB2,EZR,PDPK1,ADCYAP1,INS1,CASK,SLC16A2,HTR2C,PPT1,TRPA1,INHBB,SYT13,NAPB,KCNB1,PFN2,SUCNR1,P2RY1,LYN,GIT2,CXCL12,ERC1,M…
GO:BP	RNA biosynthetic process	GO:0032774	0.000136143	3.86601	3614	1508	269	27543	ST18,EYA1,SF3B1,HSFY2,SATB2,ERBB4,ZFP142,MDM4,PROX1,ACVR2A,NFE2L2,NEUROD1,NUP35,JAG1,SRC,GNAS,NELFCD,ZFP931,ZFHX4,BBS7,MAML3,SETDB1,ARNT,OTUD7B,BCL9,NOTCH2,TBX15,TTF2,MYOZ2,LMO4,WWP1,MUP5,KDM4C,BNC2,SSBP3,PHC2,ZFP362,KHDRBS1,PRAMEL5,CDK6,MTERF1B,FZD1,CDK14,DMTF1,EPHA5,TCHP,AUTS2,BAZ1B,MDFIC,NOBOX,KRBA1,EIF2AK3,FOXI3,LMCD1,VGLL4,NTF3,ETV6,SOX5,ARNTL2,ZFP110,TEAD1,ZFP668,KAT8,TCERG1L,INSR,RBPMS,GM1…
GO:BP	regulation of locomotion	GO:0040012	0.000146324	3.83469	1039	1508	99	27543	OPRK1,TMEFF2,ERBB4,IGFBP5,CXCR2,ARPC2,VIL1,EPHA4,DUSP10,PROX1,NFE2L2,ITGA4,JAG1,SRC,EDN3,YTHDF3,LMO4,CFAP69,SEMA3D,HGF,LIMCH1,RABGEF1,NTF3,PRCP,DOCK1,INSR,UNC5D,EDNRA,VPS35,PDGFD,TPBG,ULK4,SASH1,CITED2,ARHGAP18,LAMA2,BCR,ADORA2A,FBXO7,PAWR,NAV3,BCAS3,FLRT2,GCNT2,MCTP1,PDE4D,PLK2,DACH1,ANGPT1,HAS2,EFCAB1,ST6GAL1,CD200R1,ROBO1,APP,SMOC2,PDPK1,DPYSL3,MCC,PLXNB3,HTR2C,AKT3,RAP2B,BMPR2,LAMC2,TNN,PFN2,…
GO:BP	positive regulation of cellular biosynthetic process	GO:0031328	0.000162767	3.78843	2030	1508	167	27543	ST18,EYA1,SF3B1,BOLL,SATB2,ERBB4,ZFP142,PLA2G4A,PROX1,ACVR2A,NFE2L2,NEUROD1,JAG1,SRC,YTHDF3,MAML3,ARNT,BCL9,LMO4,SSBP3,KHDRBS1,FZD1,DMTF1,HGF,PARM1,AUTS2,BAZ1B,MDFIC,NOBOX,EIF2AK3,NTF3,ETV6,ARNTL2,TEAD1,ZFP668,KAT8,INSR,RBPMS,VPS35,ZFP423,SALL1,RORA,ICE2,ANXA2,MYO6,PLAGL1,CITED2,MAP3K5,TFAM,PAWR,HMGA2,RDH16,BCAS3,MYT1L,ETV1,SIX1,KLF6,HEATR1,PRL7B1,MAK,GCM2,GPBP1,RARB,ZMIZ1,GATA4,TSC22D1,TDRD3,ZFP…
GO:BP	export from cell	GO:0140352	0.000163535	3.78639	945	1508	92	27543	OPRK1,PLA2G4A,ACVR2A,LRP2,NEUROD1,RASGRP1,GNAS,EDN3,UBE2Q1,ENSA,CD160,GJA5,ATP1A1,MUP5,TXLNA,CLNK,EPHA5,RABGEF1,CFTR,CADPS2,GRM8,EXOC4,EXOC6B,RAB11FIP5,GRM7,SLC1A5,SERGEF,MRGPRA4,STX1B,SYT8,VPS35,SNX19,BCR,ADORA2A,CRY1,SYN3,ATP2B1,RAB21,HMGA2,TMED10,NRXN3,SEL1L,NKD2,MCTP1,TMEM167,HTR1A,ERC2,CPB2,EZR,PDPK1,ADCYAP1,INS1,CASK,SLC16A2,HTR2C,ATP1A2,PPT1,TRPA1,INHBB,SYT13,NAPB,KCNB1,PFN2,SUCNR1,P2RY1,L…
GO:BP	response to organic substance	GO:0010033	0.000164048	3.78503	3750	1508	277	27543	OPRK1,ST18,RFTN2,SATB2,CPS1,ERBB4,ATIC,IGFBP5,CXCR2,CXCR1,ARPC2,VIL1,DNAJB2,EPHA4,CAB39,BRINP3,PLA2G4A,EDEM3,OLFR16,RGS7,DUSP10,IL2RA,PIP4K2A,ACVR2A,LRP2,NFE2L2,ITGA4,NEUROD1,DNAJC10,NUP35,TFPI,JAG1,SRC,DOK5,GNAS,YTHDF3,CYP7B1,FAT4,HSPA4L,SLC7A11,TIPARP,PMVK,SETDB1,NOTCH2,HSD3B1,ATP1A1,AGL,DPYD,ANK2,MUP5,SH3GL2,EIF2B3,PSMB2,AKAP9,FZD1,HGF,HTR5A,HADHB,ADGRL3,EPHA5,PSPH,RABGEF1,CFTR,ZC3HAV1,VMN1R20…
GO:BP	heterophilic cell-cell adhesion via plasma membrane cell adhesion molecules	GO:0007157	0.000181032	3.74225	45	1508	14	27543	CRB1,HMCN1,FAT4,TENM4,CADM1,ALCAM,TENM1,VCAM1,PTPRD,IGSF21,GRID2,ITGAL,COLEC10,NRXN1
GO:BP	positive regulation of biosynthetic process	GO:0009891	0.000189485	3.72243	2080	1508	170	27543	ST18,EYA1,SF3B1,BOLL,SATB2,ERBB4,ZFP142,PLA2G4A,PROX1,ACVR2A,NFE2L2,NEUROD1,JAG1,SRC,YTHDF3,MAML3,ARNT,BCL9,LMO4,SSBP3,KHDRBS1,FZD1,DMTF1,HGF,PARM1,AUTS2,BAZ1B,MDFIC,NOBOX,EIF2AK3,NTF3,ETV6,ARNTL2,TEAD1,ZFP668,KAT8,INSR,RBPMS,VPS35,ZFP423,SALL1,RORA,ICE2,ANXA2,MYO6,PLAGL1,CITED2,MAP3K5,TFAM,PAWR,HMGA2,RDH16,BCAS3,MYT1L,ETV1,SIX1,KLF6,HEATR1,PRL7B1,MAK,GCM2,GPBP1,RARB,ZMIZ1,GATA4,TSC22D1,TDRD3,ZFP…
GO:BP	circulatory system process	GO:0003013	0.000221779	3.65408	542	1508	61	27543	CPS1,CXCR2,SLC4A3,MDM4,SRC,GNAS,EDN3,GJA5,ATP1A1,ANK2,SH3GL2,AKAP9,CFTR,AKAP13,PRCP,GLRX3,EDNRA,MYLK3,BCR,ADORA2A,ATP2B1,DSP,HTR1A,PDE4D,GATA4,ANGPT1,PPARA,APP,LNPEP,CBS,ADCYAP1,ADD3,FGF13,SLC16A2,HTR2C,ATP1A2,MFSD2A,TRPA1,BMPR2,RGS4,AGTR1B,WWTR1,SUCNR1,P2RY1,ZC3H12A,SCNN1B,HEY2,GJA1,CTNNA3,DOCK4,IMMP2L,TMEM161B,HMGCR,NCALD,EXT1,CHD7,ARHGEF12,PIK3R1,CXCR4,F2RL1,OCLN
GO:BP	regulation of transcription, DNA-templated	GO:0006355	0.000223883	3.64998	3474	1508	259	27543	ST18,EYA1,SF3B1,HSFY2,SATB2,ERBB4,ZFP142,MDM4,PROX1,ACVR2A,NFE2L2,NEUROD1,NUP35,JAG1,SRC,GNAS,NELFCD,ZFP931,ZFHX4,BBS7,MAML3,SETDB1,ARNT,OTUD7B,BCL9,NOTCH2,TBX15,MYOZ2,LMO4,WWP1,MUP5,KDM4C,BNC2,SSBP3,PHC2,ZFP362,KHDRBS1,PRAMEL5,CDK6,MTERF1B,FZD1,CDK14,DMTF1,EPHA5,TCHP,AUTS2,BAZ1B,MDFIC,NOBOX,KRBA1,EIF2AK3,FOXI3,LMCD1,VGLL4,NTF3,ETV6,SOX5,ARNTL2,ZFP110,TEAD1,ZFP668,KAT8,TCERG1L,INSR,RBPMS,GM10033,…
GO:BP	epithelial cell differentiation	GO:0030855	0.000228976	3.64021	723	1508	75	27543	CPS1,ERBB4,VIL1,PROX1,NEUROD1,FRZB,JAG1,SRC,FAT4,SLC7A11,SPRR2B,SPRR4,LCE1A2,LCE1H,LCE1K,LCE1L,NOTCH2,CDK6,FZD1,ENAM,CFTR,EDNRA,SALL1,CD109,PCDH15,BCR,GGT1,SIX1,DSP,PDE4D,RARB,GATA4,SLITRK6,STFA1,FSTL1,EZR,PDPK1,PNPLA1,FOXP4,SPINK5,ARHGEF26,MSI1,BMPR2,OPN3,USH2A,MIR205,ELF5,RBBP9,PPP1R16B,WWTR1,PTCH2,RILPL1,MET,ANXA4,KLF15,PROK2,HYDIN,TCF21,HEY2,PRDM1,GJA1,ETV4,MYCN,JAG2,MSX2,MEF2C,EXT1,ALG10B,SA…
GO:BP	regulation of nucleic acid-templated transcription	GO:1903506	0.000229521	3.63918	3475	1508	259	27543	ST18,EYA1,SF3B1,HSFY2,SATB2,ERBB4,ZFP142,MDM4,PROX1,ACVR2A,NFE2L2,NEUROD1,NUP35,JAG1,SRC,GNAS,NELFCD,ZFP931,ZFHX4,BBS7,MAML3,SETDB1,ARNT,OTUD7B,BCL9,NOTCH2,TBX15,MYOZ2,LMO4,WWP1,MUP5,KDM4C,BNC2,SSBP3,PHC2,ZFP362,KHDRBS1,PRAMEL5,CDK6,MTERF1B,FZD1,CDK14,DMTF1,EPHA5,TCHP,AUTS2,BAZ1B,MDFIC,NOBOX,KRBA1,EIF2AK3,FOXI3,LMCD1,VGLL4,NTF3,ETV6,SOX5,ARNTL2,ZFP110,TEAD1,ZFP668,KAT8,TCERG1L,INSR,RBPMS,GM10033,…
GO:BP	negative regulation of signaling	GO:0023057	0.000230353	3.63761	1375	1508	122	27543	OPRK1,EYA1,IGFBP5,EPHA4,MDM4,RGS7,DUSP10,PIP4K2A,LRP2,NFE2L2,NEUROD1,FRZB,SRC,EDN3,YTHDF3,CYP7B1,OTUD7B,RNF115,CD160,MYOZ2,MUP5,RGS3,SLC24A2,FZD1,HGF,RABGEF1,RAB11FIP5,VGLL4,CNOT1,TLE3,RORA,CGNL1,CD109,TPBG,RASA2,TNFAIP3,EYA4,ENPP1,ARG1,BICC1,CRY1,PAWR,HMGA2,SLIT3,GLRA1,GRIA1,SHISA6,PAK1IP1,NKD2,PDE4D,PLK2,GATA4,PCDH17,CSNK1E,PPARA,FAIM2,TRAP1,1810013L24RIK,ROBO1,APP,EZR,PDPK1,TWSG1,CELF4,MCC,SAL…
GO:BP	heterocycle biosynthetic process	GO:0018130	0.000230529	3.63727	4039	1508	294	27543	ST18,EYA1,SF3B1,HSFY2,SATB2,CPS1,ERBB4,ATIC,ZFP142,MDM4,PROX1,DTL,ACVR2A,NFE2L2,NEUROD1,NUP35,JAG1,SRC,GNAS,NELFCD,ATP5E,ZFP931,ZFHX4,BBS7,MAML3,SETDB1,ARNT,OTUD7B,BCL9,NOTCH2,TBX15,TTF2,MYOZ2,LMO4,WWP1,MUP5,KDM4C,BNC2,SSBP3,PHC2,ZFP362,KHDRBS1,PRAMEL5,CDK6,MTERF1B,FZD1,CDK14,DMTF1,HGF,PAICS,EPHA5,PARM1,TCHP,AUTS2,BAZ1B,MDFIC,NOBOX,KRBA1,EIF2AK3,FOXI3,LMCD1,VGLL4,NTF3,ETV6,SOX5,ARNTL2,ZFP110,TEAD…
GO:BP	regulation of cellular component movement	GO:0051270	0.000233279	3.63212	1077	1508	101	27543	TMEFF2,ERBB4,IGFBP5,CXCR2,ARPC2,VIL1,EPHA4,DUSP10,PROX1,NFE2L2,ITGA4,JAG1,SRC,EDN3,YTHDF3,GJA5,ATP1A1,ANK2,LMO4,AKAP9,CFAP69,SEMA3D,HGF,LIMCH1,RABGEF1,NTF3,PRCP,DOCK1,INSR,UNC5D,EDNRA,PDGFD,ULK4,SASH1,CITED2,ARHGAP18,LAMA2,BCR,PAWR,NAV3,BCAS3,FLRT2,DSP,GCNT2,MCTP1,PDE4D,PLK2,GATA4,DACH1,ANGPT1,HAS2,EFCAB1,CD200R1,ROBO1,APP,SMOC2,PDPK1,DPYSL3,MCC,FGF13,PLXNB3,ATP1A2,AKT3,RAP2B,BMPR2,LAMC2,TNN,PFN2…
GO:BP	presynapse organization	GO:0099172	0.000239765	3.62021	60	1508	16	27543	FZD1,VPS35,CNTN5,CADM1,PCDH17,SLITRK1,SLITRK6,APP,CBLN2,SLITRK3,PTPRD,GRID2,IL1RAP,NRXN1,PLS3,GPC6
GO:BP	secretion	GO:0046903	0.000278318	3.55546	1053	1508	99	27543	OPRK1,ERBB4,PLA2G4A,ACVR2A,LRP2,NEUROD1,RASGRP1,GNAS,EDN3,UBE2Q1,ENSA,CD160,GJA5,MUP5,TXLNA,CLNK,EPHA5,RABGEF1,CFTR,CADPS2,GRM8,EXOC4,EXOC6B,RAB11FIP5,GRM7,SLC1A5,SERGEF,MRGPRA4,STX1B,SYT8,EDNRA,VPS35,SNX19,ANXA2,MYO6,BCR,ADORA2A,CRY1,SYN3,RAB21,HMGA2,TMED10,NRXN3,SEL1L,PRL7B1,SLC6A3,NKD2,MCTP1,TMEM167,HTR1A,ERC2,CPB2,EZR,PDPK1,LHCGR,ADCYAP1,INS1,CASK,SLC16A2,HTR2C,PPT1,TRPA1,INHBB,SYT13,NAPB,KCN…
GO:BP	regulation of RNA biosynthetic process	GO:2001141	0.000279797	3.55316	3483	1508	259	27543	ST18,EYA1,SF3B1,HSFY2,SATB2,ERBB4,ZFP142,MDM4,PROX1,ACVR2A,NFE2L2,NEUROD1,NUP35,JAG1,SRC,GNAS,NELFCD,ZFP931,ZFHX4,BBS7,MAML3,SETDB1,ARNT,OTUD7B,BCL9,NOTCH2,TBX15,MYOZ2,LMO4,WWP1,MUP5,KDM4C,BNC2,SSBP3,PHC2,ZFP362,KHDRBS1,PRAMEL5,CDK6,MTERF1B,FZD1,CDK14,DMTF1,EPHA5,TCHP,AUTS2,BAZ1B,MDFIC,NOBOX,KRBA1,EIF2AK3,FOXI3,LMCD1,VGLL4,NTF3,ETV6,SOX5,ARNTL2,ZFP110,TEAD1,ZFP668,KAT8,TCERG1L,INSR,RBPMS,GM10033,…
GO:BP	regulation of neurotransmitter levels	GO:0001505	0.000291706	3.53505	239	1508	35	27543	EDN3,GABRA2,CADPS2,GRM8,GRM7,STX1B,SYT8,CLN8,MOXD1,ADORA2A,SYN3,NRXN3,SLC6A3,MCTP1,HTR1A,ERC2,CASK,HTR2C,ATP1A2,PPT1,BCHE,NAPB,PFN2,P2RY1,GIT2,ERC1,MCTP2,PRKCB,PTPRN2,NTRK2,MEF2C,PTGER4,PRKCE,NRXN1,DAGLA
GO:BP	cell morphogenesis involved in neuron differentiation	GO:0048667	0.000295045	3.53011	623	1508	67	27543	HECW2,EPHA4,LRP2,ITGA4,SPG11,BTBD3,EDN3,SEMA3D,CRMP1,EPHA5,AUTS2,NTF3,UNC5D,EDNRA,CNTN5,TPBG,LAMA2,ANK3,PCDH15,RAB21,GRIP1,KIF5A,SLIT3,CNTNAP1,ETV1,SIPA1L1,FLRT2,HECW1,SLITRK1,SLITRK6,ALCAM,ROBO1,ROBO2,APP,TIAM2,WDR36,DCC,CASK,FGF13,PLXNB3,DCX,TRPC5,MFSD2A,BMPR2,TNN,TTL,SLITRK3,UNC5C,BMPR1B,PTPRD,TMEM106B,PTPRZ1,CXCL12,ETV4,TANC2,TBCD,NTRK2,MEF2C,MIR9-2,SEMA5A,EXT1,SULT4A1,EFNA5,BHLHB9,ENAH,26103…
GO:BP	cellular response to organic substance	GO:0071310	0.000345016	3.46216	2794	1508	215	27543	OPRK1,ST18,SATB2,CPS1,ERBB4,ATIC,IGFBP5,CXCR2,CXCR1,ARPC2,VIL1,EPHA4,BRINP3,OLFR16,IL2RA,PIP4K2A,ACVR2A,LRP2,NFE2L2,ITGA4,NEUROD1,NUP35,TFPI,SRC,DOK5,GNAS,YTHDF3,CYP7B1,FAT4,TIPARP,NOTCH2,ATP1A1,MUP5,SH3GL2,AKAP9,FZD1,HGF,HTR5A,HADHB,EPHA5,RABGEF1,CFTR,ZC3HAV1,EIF2AK3,RAB11FIP5,NTF3,SOX5,AKAP13,PRCP,INSR,EDNRA,VPS35,MYLK3,ZFP423,CNOT1,CASP12,PDGFD,RORA,CD109,SASH1,CITED2,TNFAIP3,MAP3K5,ENPP1,ARG1…
GO:BP	regulation of anatomical structure morphogenesis	GO:0022603	0.000352414	3.45295	961	1508	92	27543	HECW2,CXCR2,ARPC2,VIL1,EPHA4,OLFR16,NFE2L2,SRC,PREX1,CD160,WARS2,FZD1,SEMA3D,HGF,ENAM,TMEM135,TENM4,DOCK1,EDNRA,VPS35,SASH1,CITED2,TNFAIP3,ARHGAP18,BCR,RAB21,GRIP1,HMGA2,SIX1,SIPA1L1,ADCK1,HECW1,PLK2,GATA4,SLITRK1,HAS2,FMNL3,PRKDC,ETV5,ST6GAL1,ROBO1,TIAM2,EZR,SMOC2,PDPK1,EPB41L3,CASK,FGF13,PLXNB3,DCX,TRPC5,AKT3,MFSD2A,ITGB8,BMPR2,TNN,PPP1R16B,AGTR1B,P2RY1,PTPRD,ZC3H12A,GRHL3,LFNG,PTPRZ1,CXCL12,PR…
GO:BP	neurotransmitter transport	GO:0006836	0.000389552	3.40943	231	1508	34	27543	EDN3,GABRA2,CADPS2,GRM8,GRM7,STX1B,SYT8,CLN8,ADORA2A,SYN3,NRXN3,SLC6A3,SLC6A18,MCTP1,HTR1A,ERC2,CASK,HTR2C,ATP1A2,PPT1,NAPB,PFN2,P2RY1,GIT2,ERC1,MCTP2,PRKCB,PTPRN2,NTRK2,MEF2C,SV2C,PTGER4,PRKCE,NRXN1
GO:BP	nucleobase-containing compound biosynthetic process	GO:0034654	0.00045336	3.34356	3971	1508	288	27543	ST18,EYA1,SF3B1,HSFY2,SATB2,ERBB4,ATIC,ZFP142,MDM4,PROX1,DTL,ACVR2A,NFE2L2,NEUROD1,NUP35,JAG1,SRC,GNAS,NELFCD,ATP5E,ZFP931,ZFHX4,BBS7,MAML3,SETDB1,ARNT,OTUD7B,BCL9,NOTCH2,TBX15,TTF2,MYOZ2,LMO4,WWP1,MUP5,KDM4C,BNC2,SSBP3,PHC2,ZFP362,KHDRBS1,PRAMEL5,CDK6,MTERF1B,FZD1,CDK14,DMTF1,HGF,PAICS,EPHA5,PARM1,TCHP,AUTS2,BAZ1B,MDFIC,NOBOX,KRBA1,EIF2AK3,FOXI3,LMCD1,VGLL4,NTF3,ETV6,SOX5,ARNTL2,ZFP110,TEAD1,ZFP…
GO:BP	negative regulation of multicellular organismal process	GO:0051241	0.000454263	3.34269	1078	1508	100	27543	OPRK1,PLCL1,IGFBP5,EPHA4,DUSP10,FRZB,TFPI,GNAS,PGLYRP4,PGLYRP3,CTSK,OTUD7B,CD160,GJA5,ATP1A1,CDK6,SEMA3D,HGF,RABGEF1,CFTR,RAB11FIP5,ALMS1,VGLL4,PGLYRP1,GLRX3,INSR,ISX,INPP4B,N4BP1,ZFP423,LINGO1,TLE3,ANXA2,CITED2,TNFAIP3,ARG1,BCR,CRY1,FBXO7,ATP2B1,PAWR,NAV3,TSPAN8,HMGA2,GLRA1,NOVA1,PDE4D,PLK2,RARB,GATA4,CPB2,ZFPM2,ANGPT1,PPARA,CD200R1,ROBO1,APP,ADAMTS5,EZR,LNPEP,TNFRSF21,FOXP4,DAAM2,TWSG1,ADCYAP1,…
GO:BP	response to external stimulus	GO:0009605	0.000454444	3.34252	3104	1508	234	27543	OPRK1,DEFB41,CPS1,CXCR2,CXCR1,VIL1,EPHA4,CRB1,PLA2G4A,HMCN1,OLFR16,DUSP10,PROX1,IL2RA,LRP2,NFE2L2,ITGA4,TFPI,RASGRP1,MACROD2,SRC,PREX1,EDN3,YTHDF3,CYP7B1,PGLYRP4,PGLYRP3,PIP5K1A,SETDB1,FCGR1,CD160,NOTCH2,REG4,CD2,ATP1A1,COL11A1,AGL,DPYD,ALPK1,SLC24A2,SGIP1,AGBL4,CDK6,SEMA3D,HGF,PRKAG2,HADHB,CRMP1,CLNK,OCIAD2,EPHA5,SLC15A4,PSPH,RABGEF1,AUTS2,CADPS2,GRM8,ZC3HAV1,MMRN1,EIF2AK3,RAB11FIP5,CACNA2D4,CLE…
GO:BP	cellular protein localization	GO:0034613	0.000469521	3.32835	1717	1508	144	27543	ERBB4,ARPC2,VIL1,DPP10,CRB1,SEC16B,GPR158,LRP2,ITGA4,NUP35,SPG11,SRC,SLC7A11,PIP5K1A,VPS45,OTUD7B,UGT8A,ANK2,ASTN2,PEX1,DPP6,KCNIP4,SRP72,RABGEF1,MDFIC,EXOC4,AGK,LRRTM4,EXOC6B,RAB11FIP5,EDEM1,AP2S1,XPO6,STX1B,WRN,SORBS2,EDNRA,VPS35,ZFP423,ANXA2,TPBG,SYNE1,TNFAIP3,STX7,ANK3,BCR,FBXO7,RAB21,GRIP1,KIF5A,EIF4ENIF1,POM121L12,SHISA6,BCAS3,CNTNAP1,TRAPPC12,SIX1,TMED10,VIPAS39,SEL1L,TTC7B,CLTB,NKD2,ZDHHC…
GO:BP	cell-cell adhesion via plasma-membrane adhesion molecules	GO:0098742	0.000481437	3.31746	277	1508	38	27543	CRB1,HMCN1,CDH26,FAT4,ADGRL3,TENM4,UNC5D,CNTN5,FAT3,KIRREL3,CADM1,TNFAIP3,PCDH15,PCDH17,PCDH9,SLITRK1,CDH10,CDH12,IGSF11,ALCAM,ROBO1,TENM1,PLXNB3,CDH20,SLITRK3,VCAM1,PTPRD,IGSF21,GRID2,ITGAL,CDH6,COLEC10,IL1RAP,CLDN8,EFNA5,NRXN1,DSC3,GPC6
GO:BP	positive regulation of nucleobase-containing compound metabolic process	GO:0045935	0.000485229	3.31405	2049	1508	166	27543	ST18,EYA1,SF3B1,SATB2,ERBB4,ZFP142,PROX1,ACVR2A,NFE2L2,NEUROD1,JAG1,SRC,YTHDF3,MAML3,ARNT,SF3B4,BCL9,LMO4,SSBP3,FZD1,DMTF1,HGF,PARM1,AUTS2,BAZ1B,MDFIC,ZC3HAV1,NOBOX,EIF2AK3,NTF3,ETV6,ARNTL2,TEAD1,ZFP668,KAT8,INSR,WRN,RBPMS,ZFP423,SALL1,CNOT1,RORA,ICE2,ANXA2,MYO6,PLAGL1,CITED2,MAP3K5,EYA4,TFAM,HMGA2,EIF4ENIF1,BCAS3,MYT1L,ETV1,SIX1,KLF6,HEATR1,PRL7B1,MAK,GCM2,GPBP1,RARB,ZMIZ1,GATA4,TSC22D1,TDRD3,ZF…
GO:BP	transcription by RNA polymerase II	GO:0006366	0.000534401	3.27213	2560	1508	199	27543	ST18,EYA1,HSFY2,SATB2,ZFP142,MDM4,PROX1,ACVR2A,NFE2L2,NEUROD1,JAG1,GNAS,NELFCD,ZFP931,ZFHX4,BBS7,MAML3,ARNT,OTUD7B,BCL9,NOTCH2,TBX15,MYOZ2,LMO4,KDM4C,SSBP3,ZFP362,KHDRBS1,CDK6,DMTF1,AUTS2,NOBOX,FOXI3,LMCD1,NTF3,ETV6,SOX5,ARNTL2,TEAD1,ZFP668,KAT8,ISX,ZFP423,SALL1,CNOT1,RORA,ICE2,ANXA2,MYO6,ZBTB2,PLAGL1,CITED2,OLIG3,FRK,SIM1,AU041133,CRY1,PAWR,HMGA2,BCAS3,MYT1L,ETV1,SIX6,SIX1,YLPM1,KLF6,GCM2,IRX1,G…
GO:BP	regulation of cell junction assembly	GO:1901888	0.000557425	3.25381	213	1508	32	27543	SRC,FZD1,LIMCH1,ADGRL3,LRRTM4,TPBG,BCAS3,SIX1,SIPA1L1,FLRT2,SLITRK1,SLITRK6,UBE2V2,APP,CBLN2,ARHGAP6,SYNDIG1,SLITRK3,PTPRD,GRID2,GJA1,NTRK2,MEF2C,SNAI2,IL1RAP,EFNA5,NRXN1,BHLHB9,GPC6,PIK3R1,EEF2K,LINGO2
GO:BP	cellular response to stimulus	GO:0051716	0.000606151	3.21742	8778	1508	571	27543	OPRK1,ST18,EYA1,STK17B,PLCL1,SATB2,CRYGF,CPS1,ERBB4,ATIC,IGFBP5,CXCR2,CXCR1,ARPC2,VIL1,DNAJB2,EPHA4,DNER,CAB39,SLC41A1,MDM4,CRB1,BRINP3,PLA2G4A,EDEM3,OLFR16,RGS7,DUSP10,PROX1,DTL,IL2RA,PIP4K2A,GPR158,OLFR342,ACVR2A,LRP2,NFE2L2,ITGA4,NEUROD1,PPP1R1C,PDE1A,DNAJC10,FRZB,NUP35,TFPI,RASGRP1,JAG1,MACROD2,SRC,PREX1,DOK5,GNAS,EDN3,YTHDF3,CYP7B1,PDE7A,BBS7,FAT4,SLC7A11,MAML3,TIPARP,TUFT1,PI4KB,PIP5K1A,ARN…
GO:BP	cellular macromolecule localization	GO:0070727	0.00061663	3.20998	1725	1508	144	27543	ERBB4,ARPC2,VIL1,DPP10,CRB1,SEC16B,GPR158,LRP2,ITGA4,NUP35,SPG11,SRC,SLC7A11,PIP5K1A,VPS45,OTUD7B,UGT8A,ANK2,ASTN2,PEX1,DPP6,KCNIP4,SRP72,RABGEF1,MDFIC,EXOC4,AGK,LRRTM4,EXOC6B,RAB11FIP5,EDEM1,AP2S1,XPO6,STX1B,WRN,SORBS2,EDNRA,VPS35,ZFP423,ANXA2,TPBG,SYNE1,TNFAIP3,STX7,ANK3,BCR,FBXO7,RAB21,GRIP1,KIF5A,EIF4ENIF1,POM121L12,SHISA6,BCAS3,CNTNAP1,TRAPPC12,SIX1,TMED10,VIPAS39,SEL1L,TTC7B,CLTB,NKD2,ZDHHC…
GO:BP	multicellular organismal homeostasis	GO:0048871	0.000635628	3.1968	533	1508	59	27543	PLCL1,ERBB4,CRB1,PLA2G4A,NEUROD1,SRC,GNAS,CTSK,MUP5,SH3GL2,SGIP1,NCDN,CFTR,ALMS1,PRCP,CLN8,ZFP423,TLE3,PCDH15,BBS10,ACACA,NOVA1,GCNT2,MAK,ADGRV1,ANGPT1,COL14A1,HAS2,ADAMTS5,LNPEP,PNPLA1,ADCYAP1,WDR36,AKT3,MFSD2A,USH2A,WWTR1,AQP3,BMP8B,MTF1,GRHL3,PRDM16,ACACB,MET,SCNN1B,GJA1,POC1B,GRB10,STAT3,DYNC1H1,PTGER4,EXT1,CCDC154,TMEM64,SCNN1G,COL2A1,FH1,ACSL1,OCLN
GO:BP	cardiac septum development	GO:0003279	0.000661314	3.17959	115	1508	22	27543	MDM4,PROX1,XIRP2,LRP2,JAG1,GJA5,NOTCH2,ANK2,LMO4,FZD1,CITED2,SLIT3,GATA4,ZFPM2,BMPR2,DCTN5,HEY2,PRDM1,HECTD1,DNAH11,MSX2,CHD7
GO:BP	cellular response to chemical stimulus	GO:0070887	0.000706412	3.15094	3457	1508	255	27543	OPRK1,ST18,SATB2,CRYGF,CPS1,ERBB4,ATIC,IGFBP5,CXCR2,CXCR1,ARPC2,VIL1,EPHA4,SLC41A1,MDM4,BRINP3,PLA2G4A,OLFR16,IL2RA,PIP4K2A,ACVR2A,LRP2,NFE2L2,ITGA4,NEUROD1,NUP35,TFPI,SRC,PREX1,DOK5,GNAS,EDN3,YTHDF3,CYP7B1,FAT4,SLC7A11,TIPARP,PIP5K1A,ARNT,NOTCH2,ATP1A1,MUP5,SH3GL2,AKAP9,FZD1,HGF,HTR5A,HADHB,EPHA5,RABGEF1,CFTR,ZC3HAV1,EIF2AK3,RAB11FIP5,NTF3,SOX5,AKAP13,PRCP,VKORC1,SYT8,INSR,SORBS2,EDNRA,VPS35,MYL…
GO:BP	cell population proliferation	GO:0008283	0.000753638	3.12284	2109	1508	169	27543	ST18,EYA1,ERBB4,IGFBP5,CXCR2,DNAJB2,EPHA4,MDM4,PLA2G4A,DUSP10,PROX1,IL2RA,ACVR2A,LRP2,ITGA4,FRZB,RASGRP1,JAG1,SRC,GNAS,CTSZ,EDN3,CYP7B1,FAT4,SLC7A11,CHTOP,NOTCH2,PTBP2,MMP16,ORC3,KDM4C,SSBP3,AGBL4,PRAMEL5,CDK6,HGF,SLC7A1,ALMS1,VGLL4,NTF3,ETV6,SOX5,TENM4,SETD1A,INSR,EDNRA,ZFP423,PDGFD,RORA,ANXA2,CD109,TPBG,CITED2,TNFAIP3,MAP3K5,ARG1,ADORA2A,PAWR,LGR5,HMGA2,SLIT3,EGLN3,SIX1,TCL1,PRL7B1,GCNT2,PAK1IP…
GO:BP	regulation of cell differentiation	GO:0045595	0.000805761	3.09379	1718	1508	143	27543	EYA1,IGFBP5,ARPC2,EPHA4,BRINP3,OLFR16,DUSP10,PROX1,IL2RA,ACVR2A,LRP2,NFE2L2,NEUROD1,FRZB,RASGRP1,JAG1,PREX1,GNAS,EDN3,FAT4,PGLYRP4,PGLYRP3,NOTCH2,KDM4C,PRAMEL5,CDK6,SEMA3D,CFTR,ALMS1,NTF3,SOX5,PGLYRP1,TENM4,SETD1A,DOCK1,INPP4B,MYLK3,LINGO1,RORA,ANXA2,CD109,MAP3K5,ENPP1,FBXO7,PAWR,RAB21,HMGA2,EIF4ENIF1,SIX1,GCNT2,ADGRV1,RARB,ZMIZ1,GATA4,SLITRK1,ZFPM2,HAS2,NFAM1,PPARA,RBFOX1,PRKDC,ETV5,ROBO1,APP,TI…
GO:BP	cellular nitrogen compound biosynthetic process	GO:0044271	0.000902798	3.04441	4774	1508	335	27543	ST18,EYA1,SF3B1,BOLL,HSFY2,SATB2,CPS1,ERBB4,ATIC,IGFBP5,ZFP142,MDM4,PROX1,DTL,ACVR2A,CERS6,NFE2L2,NEUROD1,NUP35,JAG1,SRC,GNAS,NELFCD,ATP5E,ZFP931,EEF1A2,ZFHX4,MRPS28,YTHDF3,BBS7,SLC7A11,MAML3,SETDB1,ARNT,OTUD7B,BCL9,NOTCH2,WARS2,TBX15,TTF2,MYOZ2,UGT8A,LMO4,WWP1,MUP5,KDM4C,BNC2,SSBP3,EIF2B3,PHC2,ZFP362,KHDRBS1,PRAMEL5,CDK6,MTERF1B,FZD1,CDK14,DMTF1,HGF,PAICS,EPHA5,PARM1,TCHP,AUTS2,BAZ1B,MDFIC,AGK,N…
GO:BP	regulation of protein modification process	GO:0031399	0.000949645	3.02244	1574	1508	133	27543	PLCL1,ERBB4,DNAJB2,EPHA4,CAB39,DUSP10,PROX1,ACVR2A,DNAJC10,RASGRP1,SRC,GNAS,EDN3,CHTOP,ARNT,ENSA,KDM4C,SH3GL2,AKAP9,FZD1,HGF,PRKAG2,LIMCH1,TEC,FZD10,RABGEF1,AUTS2,CLEC4N,NTF3,AKAP13,KAT8,INSR,RBPMS,EDNRA,N4BP1,PDGFD,ANXA2,CCNB2,CD109,SPSB4,SASH1,TNFAIP3,MAP3K5,ENPP1,UBE2D1,ADORA2A,CRY1,FBXO7,PAWR,HMGA2,FBXO33,TCL1,RNF180,PDE4D,ZMIZ1,GATA4,ANGPT1,TWF1,UBE2V2,PRKDC,RABL3,ROBO1,APP,PDPK1,CBS,TWSG1,A…
GO:BP	signal release from synapse	GO:0099643	0.000954416	3.02026	176	1508	28	27543	EDN3,CADPS2,GRM8,GRM7,STX1B,SYT8,ADORA2A,SYN3,NRXN3,MCTP1,HTR1A,ERC2,CASK,HTR2C,PPT1,NAPB,PFN2,P2RY1,GIT2,ERC1,MCTP2,PRKCB,PTPRN2,NTRK2,MEF2C,PTGER4,PRKCE,NRXN1
GO:BP	neurotransmitter secretion	GO:0007269	0.000954416	3.02026	176	1508	28	27543	EDN3,CADPS2,GRM8,GRM7,STX1B,SYT8,ADORA2A,SYN3,NRXN3,MCTP1,HTR1A,ERC2,CASK,HTR2C,PPT1,NAPB,PFN2,P2RY1,GIT2,ERC1,MCTP2,PRKCB,PTPRN2,NTRK2,MEF2C,PTGER4,PRKCE,NRXN1
GO:BP	regulation of cellular biosynthetic process	GO:0031326	0.000980777	3.00843	4136	1508	296	27543	ST18,EYA1,SF3B1,BOLL,HSFY2,SATB2,ERBB4,IGFBP5,ZFP142,MDM4,PLA2G4A,PROX1,MALRD1,ACVR2A,NFE2L2,NEUROD1,NUP35,JAG1,SRC,GNAS,NELFCD,ZFP931,ZFHX4,YTHDF3,BBS7,SLC7A11,MAML3,SETDB1,ARNT,OTUD7B,BCL9,NOTCH2,TBX15,ATP1A1,MYOZ2,LMO4,WWP1,MUP5,KDM4C,BNC2,SSBP3,PHC2,ZFP362,KHDRBS1,PRAMEL5,CDK6,MTERF1B,FZD1,CDK14,DMTF1,HGF,EPHA5,PARM1,TCHP,AUTS2,BAZ1B,MDFIC,NOBOX,KRBA1,EIF2AK3,FOXI3,LMCD1,VGLL4,NTF3,ETV6,SOX5,…
GO:BP	morphogenesis of an epithelium	GO:0002009	0.000987321	3.00554	540	1508	59	27543	EYA1,TMEFF2,ERBB4,IGFBP5,CXCR2,EPHA4,PROX1,LRP2,FRZB,JAG1,SRC,CTSZ,CYP7B1,FAT4,NOTCH2,LMO4,ASTN2,FZD1,HGF,ALMS1,EDNRA,SALL1,MTHFD1L,CITED2,IPMK,PCDH15,LGR5,HMGA2,SIX1,IRX1,GATA4,ANGPT1,ETV5,T,KIF26B,TGM2,AGTR1B,FREM2,GRHL3,MET,CXCL12,SCNN1B,TCF21,GJA1,ETV4,MYCN,HECTD1,JAG2,MSX2,MEF2C,ADAMTS12,RSPO2,EXT1,SNAI2,SOS1,ZIC3,ENAH,CXCR4,SCNN1G
GO:BP	heart morphogenesis	GO:0003007	0.00105908	2.97507	263	1508	36	27543	EYA1,MDM4,PROX1,XIRP2,LRP2,JAG1,FAT4,GJA5,NOTCH2,COL11A1,FZD1,INSR,EDNRA,CITED2,SLIT3,SIX1,FLRT2,DSP,ZMIZ1,GATA4,ZFPM2,ANGPT1,HAS2,T,BMPR2,HEY2,GJA1,DNAH11,MSX2,MEF2C,EXT1,SNAI2,SOS1,ZIC3,CHD7,COL2A1
GO:BP	positive regulation of protein metabolic process	GO:0051247	0.0010991	2.95896	1519	1508	129	27543	ST18,HECW2,BOLL,ERBB4,DNAJB2,EPHA4,CAB39,PROX1,DTL,ACVR2A,RASGRP1,SRC,GNAS,EDN3,YTHDF3,BBS7,TIPARP,CHTOP,ARNT,SEC22B,WWP1,AGBL4,KHDRBS1,ANKIB1,AKAP9,FZD1,HGF,PRKAG2,LIMCH1,TEC,FZD10,AUTS2,VGLL4,CLEC4N,NTF3,AKAP13,KAT8,INSR,RBPMS,EDNRA,VPS35,CASP12,PDGFD,ANXA2,SPSB4,SASH1,PERP,TNFAIP3,MAP3K5,UBE2D1,CRY1,PAWR,HMGA2,RNF144A,EGLN3,FBXO33,TCL1,HECW1,NKD2,RNF180,PDE4D,PLK2,GATA4,ANGPT1,CSNK1E,UBE2V2,PR…
GO:BP	vesicle-mediated transport	GO:0016192	0.00111527	2.95262	1653	1508	138	27543	PGAP1,CXCR2,CXCR1,PLA2G4A,SEC16B,PIP4K2A,LRP2,ITGA4,RASGRP1,SPG11,SRC,VPS45,FCGR1,CD160,SEC22B,ANK2,SH3GL2,SGIP1,TXLNA,CLNK,TMEM175,RABGEF1,CFTR,CADPS2,GRM8,EXOC4,EXOC6B,RAB11FIP5,ALMS1,GRM7,NTF3,CCDC91,AP2S1,PSG29,CEACAM14,CEACAM11,MRGPRA4,STX1B,DOCK1,SYT8,INSR,VPS35,SNX19,ANXA2,MYO6,TBC1D2B,STX7,ENPP1,TRAPPC3L,WASF1,ANK3,BCR,ADORA2A,SYN3,RAB21,GRIP1,KIF5A,ABCA13,GRIA1,TRAPPC12,STXBP6,TMED10,VIP…
GO:BP	regulation of transcription by RNA polymerase II	GO:0006357	0.00114311	2.94191	2494	1508	193	27543	ST18,EYA1,HSFY2,SATB2,ZFP142,MDM4,PROX1,ACVR2A,NFE2L2,NEUROD1,JAG1,GNAS,ZFP931,ZFHX4,BBS7,MAML3,ARNT,OTUD7B,BCL9,NOTCH2,TBX15,MYOZ2,LMO4,KDM4C,SSBP3,ZFP362,KHDRBS1,CDK6,DMTF1,AUTS2,NOBOX,FOXI3,LMCD1,NTF3,ETV6,SOX5,ARNTL2,TEAD1,ZFP668,KAT8,ISX,ZFP423,SALL1,CNOT1,RORA,ANXA2,MYO6,ZBTB2,PLAGL1,CITED2,OLIG3,FRK,SIM1,AU041133,CRY1,PAWR,HMGA2,BCAS3,MYT1L,ETV1,SIX6,SIX1,YLPM1,KLF6,GCM2,IRX1,GPBP1,RARB,ZM…
GO:BP	regulation of phosphate metabolic process	GO:0019220	0.00115231	2.93843	1432	1508	123	27543	PLCL1,ERBB4,EPHA4,CAB39,DUSP10,PROX1,PIP4K2A,ACVR2A,DNAJC10,RASGRP1,SRC,GNAS,EDN3,EEF1A2,ENSA,LMO4,SH3GL2,AKAP9,FZD1,HGF,PRKAG2,LIMCH1,TEC,EPHA5,FZD10,RABGEF1,PPP1R17,CLEC4N,NTF3,AKAP13,INSR,RBPMS,EDNRA,PDGFD,ANXA2,CCNB2,CD109,SASH1,TNFAIP3,MAP3K5,ENPP1,ADORA2A,FBXO7,PAWR,HMGA2,TCL1,PDE4D,GATA4,ANGPT1,PPARA,TWF1,PRKDC,ROBO1,APP,PDPK1,CBS,TWSG1,LHCGR,ADCYAP1,RIT2,PPP2R2B,SOCS6,PPP6R3,FGF13,TRPC5,H…
GO:BP	regulation of phosphorus metabolic process	GO:0051174	0.00119495	2.92265	1433	1508	123	27543	PLCL1,ERBB4,EPHA4,CAB39,DUSP10,PROX1,PIP4K2A,ACVR2A,DNAJC10,RASGRP1,SRC,GNAS,EDN3,EEF1A2,ENSA,LMO4,SH3GL2,AKAP9,FZD1,HGF,PRKAG2,LIMCH1,TEC,EPHA5,FZD10,RABGEF1,PPP1R17,CLEC4N,NTF3,AKAP13,INSR,RBPMS,EDNRA,PDGFD,ANXA2,CCNB2,CD109,SASH1,TNFAIP3,MAP3K5,ENPP1,ADORA2A,FBXO7,PAWR,HMGA2,TCL1,PDE4D,GATA4,ANGPT1,PPARA,TWF1,PRKDC,ROBO1,APP,PDPK1,CBS,TWSG1,LHCGR,ADCYAP1,RIT2,PPP2R2B,SOCS6,PPP6R3,FGF13,TRPC5,H…
GO:BP	regulation of response to external stimulus	GO:0032101	0.00120251	2.91991	946	1508	89	27543	CXCR2,EPHA4,PLA2G4A,DUSP10,IL2RA,NFE2L2,TFPI,RASGRP1,EDN3,YTHDF3,FCGR1,CD160,SEMA3D,HGF,CLNK,SLC15A4,RABGEF1,ZC3HAV1,MMRN1,CLEC4N,NTF3,PGLYRP1,VKORC1,EDNRA,VPS35,N4BP1,CASP12,PDGFD,CADM1,RORA,ANXA2,CD109,TPBG,SASH1,TNFAIP3,ARG1,BCR,ADORA2A,GGT1,POLR3B,TSPAN8,SLC6A3,ZDHHC11,CPB2,PPARA,PRKDC,ST6GAL1,MASP1,CD200R1,ROBO1,APP,SMOC2,ADCYAP1,SPINK5,CASK,VSIG4,BMPR2,XRCC5,IFI214,IFI208,IFI204,IFI202B,SUC…
GO:BP	hematopoietic or lymphoid organ development	GO:0048534	0.0012045	2.91919	1016	1508	94	27543	DUSP10,IL2RA,PIP4K2A,ACVR2A,NFE2L2,RASGRP1,JAG1,SRC,PREX1,GNAS,TIPARP,PGLYRP4,PGLYRP3,NOTCH2,LMO4,WWP1,SSBP3,CDK6,ETV6,PGLYRP1,SETD1A,KAT8,DOCK1,INPP4B,KIRREL3,RORA,CCNB2,CD109,CITED2,TNFAIP3,L3MBTL3,BCR,FBXO7,TPO,SIX1,STON2,ZMIZ1,ANGPT1,NFAM1,PRKDC,RABL3,APP,PKNOX1,TWSG1,AHCTF1,SLC4A1,ITGB8,XRCC5,RABGAP1L,IFI204,GPR171,LYN,PTBP3,PABPC4,ZC3H12A,CSF3R,PRDM16,LFNG,PTPRZ1,ATXN1L,IRF8,ANLN,POU2AF1,TC…
GO:BP	Notch signaling pathway	GO:0007219	0.00121032	2.9171	178	1508	28	27543	DNER,IL2RA,JAG1,SRC,FAT4,MAML3,NOTCH2,CDK6,SORBS2,ZFP423,PERP,SIX1,SEL1L,ZMIZ1,APP,RCAN2,PSEN2,SLC35C1,KCTD10,LFNG,ANXA4,HEY2,STAT3,DLK1,RIAN,JAG2,CDH6,SNAI2
GO:BP	supramolecular fiber organization	GO:0097435	0.00126632	2.89746	755	1508	75	27543	TMEFF2,ARPC2,VIL1,HMCN1,PROX1,MSRB2,XIRP2,SRC,TCHH,PDE4DIP,COL11A1,MYOZ2,AKAP9,LIMCH1,CAPZA2,ALMS1,AKAP13,SORBS2,MYLK3,ANXA2,CGNL1,ARHGAP18,WASF1,PCDH15,PAWR,NAV3,VIPAS39,ELMO1,DSP,HTR1A,DIAPH3,COL14A1,TWF1,APP,EZR,DAAM2,CRIPT,DPYSL3,PGM5,ADD3,FGF13,ARHGAP6,RGS4,DSTN,ARHGAP40,STMN2,PFN2,SSH1,MYO1H,MET,ARHGAP17,CTNNA3,SPTBN1,ADAMTS2,TAOK1,KIF2B,TBCD,DYNC1H1,MEF2C,ZBED3,IQGAP2,PTGER4,ADAMTS12,EXT1,…
GO:BP	regulation of macromolecule biosynthetic process	GO:0010556	0.00130153	2.88555	3953	1508	284	27543	ST18,EYA1,TMEFF2,SF3B1,BOLL,HSFY2,SATB2,ERBB4,IGFBP5,ZFP142,MDM4,PROX1,ACVR2A,NFE2L2,NEUROD1,NUP35,JAG1,SRC,GNAS,NELFCD,ZFP931,ZFHX4,YTHDF3,BBS7,MAML3,SETDB1,ARNT,OTUD7B,BCL9,NOTCH2,TBX15,MYOZ2,LMO4,WWP1,MUP5,KDM4C,BNC2,SSBP3,PHC2,ZFP362,KHDRBS1,PRAMEL5,CDK6,MTERF1B,FZD1,CDK14,DMTF1,HGF,EPHA5,PARM1,TCHP,AUTS2,BAZ1B,MDFIC,NOBOX,KRBA1,EIF2AK3,FOXI3,LMCD1,VGLL4,NTF3,ETV6,SOX5,ARNTL2,ZFP110,TEAD1,ZFP…
GO:BP	ion transmembrane transport	GO:0034220	0.00143388	2.84349	1105	1508	100	27543	OPRK1,HECW2,SLC4A3,SLC41A1,RGS7,KCNT1,KCNJ3,KCNH7,LRP2,EDN3,SLC7A11,KCNN3,ANXA9,ATP1A1,ANK2,CNGB3,SLC7A13,SLC24A2,AKAP9,DPP6,KCNIP4,GABRA2,TMEM175,COX6A1,SLC15A4,SLC7A1,CFTR,SLC41A3,CRBN,GRM7,CACNA2D4,SLC1A5,CLN8,EDNRA,ANXA2,ARG1,AKAP7,ANK3,ATP2B1,PAWR,GLRA1,GRIA1,SHISA6,HECW1,SLC6A3,SLC6A18,SLC12A7,PDE4D,CACNA2D3,KCNV1,SHISA9,APP,GRIK1,KCNJ6,PDPK1,SLC37A1,KCNH8,LHCGR,SLC22A27,TRPM3,FGF13,TRPC5,H…
GO:BP	regulation of biosynthetic process	GO:0009889	0.00145932	2.83585	4220	1508	300	27543	ST18,EYA1,TMEFF2,SF3B1,BOLL,HSFY2,SATB2,ERBB4,IGFBP5,ZFP142,MDM4,PLA2G4A,PROX1,MALRD1,ACVR2A,NFE2L2,NEUROD1,NUP35,JAG1,SRC,GNAS,NELFCD,ZFP931,ZFHX4,YTHDF3,BBS7,SLC7A11,MAML3,SETDB1,ARNT,OTUD7B,BCL9,NOTCH2,TBX15,ATP1A1,MYOZ2,LMO4,WWP1,MUP5,KDM4C,BNC2,SSBP3,PHC2,ZFP362,KHDRBS1,PRAMEL5,CDK6,MTERF1B,FZD1,CDK14,DMTF1,HGF,EPHA5,PARM1,TCHP,AUTS2,BAZ1B,MDFIC,NOBOX,KRBA1,EIF2AK3,FOXI3,LMCD1,VGLL4,NTF3,ETV…
GO:BP	regulation of developmental growth	GO:0048638	0.00149936	2.82409	372	1508	45	27543	ERBB4,VIL1,DUSP10,PROX1,GNAS,SGIP1,SEMA3D,ALMS1,VGLL4,INSR,CITED2,RAB21,HMGA2,SIX1,SLC6A3,GATA4,ZFPM2,COL14A1,PPARA,PRKDC,APP,EZR,WDR36,FGF13,DCX,TRPC5,MFSD2A,BMPR2,RGS4,TTL,ACACB,CXCL12,HEY2,GJA1,STAT3,DIO3,MEF2C,GHR,PTGER4,SEMA5A,EFNA5,CHD7,CXCR4,STAT5B,CCNB1
GO:BP	regulation of protein metabolic process	GO:0051246	0.00157226	2.80348	2631	1508	201	27543	ST18,HECW2,BOLL,PLCL1,ERBB4,IGFBP5,VIL1,DNAJB2,EPHA4,CAB39,MDM4,DUSP10,PROX1,DTL,ACVR2A,DNAJC10,TFPI,RASGRP1,SRC,GNAS,CTSZ,EDN3,YTHDF3,BBS7,TIPARP,CHTOP,ARNT,ENSA,SEC22B,WWP1,KDM4C,SH3GL2,AGBL4,KHDRBS1,ANKIB1,AKAP9,FZD1,HGF,PRKAG2,LIMCH1,TEC,FZD10,RABGEF1,AUTS2,EIF2AK3,VGLL4,CLEC4N,NTF3,AKAP13,KAT8,INSR,RBPMS,EDNRA,VPS35,N4BP1,CNOT1,CASP12,PDGFD,ANXA2,CCNB2,CD109,SPSB4,SASH1,PERP,TNFAIP3,MAP3K5,E…
GO:BP	cellular response to growth factor stimulus	GO:0071363	0.00165635	2.78085	693	1508	70	27543	CPS1,ERBB4,ARPC2,VIL1,ACVR2A,LRP2,SRC,DOK5,FAT4,NOTCH2,SH3GL2,FZD1,HGF,NTF3,SOX5,INSR,ZFP423,PDGFD,CD109,CITED2,ARG1,WASF1,FLRT2,GCNT2,ZMIZ1,GATA4,ANGPT1,HAS2,CSNK1E,PPARA,FSTL1,ROBO1,APP,SMOC2,RGMB,PDPK1,TWSG1,CASK,CHRDL1,ITGB8,BMPR2,GREM2,STMN2,VCAM1,BMPR1B,BMP8B,PRDM16,PRKCB,NUS1,DCN,GRB10,CRK,STAT3,BECN1,MSX2,NTRK2,MEF2C,ADAMTS12,EXT1,SNAI2,SOS1,PRKCE,NRXN1,BAMBI,FBN2,TCF4,EEF2K,STAT5B,COL2A1…
GO:BP	response to organic cyclic compound	GO:0014070	0.00167165	2.77686	1123	1508	101	27543	OPRK1,RFTN2,CPS1,IGFBP5,ARPC2,OLFR16,TFPI,SRC,GNAS,CYP7B1,SLC7A11,TIPARP,PMVK,HSD3B1,ATP1A1,AGL,DPYD,PSMB2,AKAP9,HTR5A,ADGRL3,EPHA5,PSPH,CFTR,ZC3HAV1,AKAP13,VKORC1,EDNRA,VPS35,CNOT1,RORA,ENPP1,ARG1,AKAP7,ADORA2A,GGT1,CRY1,ATP2B1,HMGA2,SLIT3,ACACA,SIX1,SLC6A3,HTR1A,PDE4D,ZMIZ1,PPARA,HTR1F,APP,EZR,CBS,ADCYAP1,MBD2,INS1,HTR2C,ATP1A2,BCHE,TRPA1,INHBB,RGS4,ADSS,SMYD3,TGM2,AGTR1B,P2RY13,P2RY1,HSD3B5,LY…
GO:BP	chordate embryonic development	GO:0043009	0.00170024	2.76949	788	1508	77	27543	EYA1,SATB2,ETL4,ACVR2A,LRP2,DHX35,GNAS,CHTOP,ARNT,OTUD7B,NOTCH2,TBX15,COL11A1,LMO4,MMP16,KDM4C,SSBP3,AGBL4,GJB5,FZD1,PSPH,SOX5,EDNRA,CNOT1,CCNB2,MTHFD1L,CITED2,IPMK,RTCB,SIX1,ZMIZ1,GATA4,ZFPM2,ANGPT1,ADCY9,PRKDC,T,IFT140,CELF4,NSDHL,NRK,BMPR2,TTLL4,SPEG,ST8SIA6,MBNL1,VCAM1,GRHL3,PAX7,MYO18B,LFNG,HEY2,PRDM1,GJA1,UPB1,BRCA1,TANC2,MYCN,HECTD1,ITPK1,JAG2,NCAPG2,CTS7,MEF2C,EXT1,ZFAT,GABPA,DSC3,DMRT2,T…
GO:BP	presynapse assembly	GO:0099054	0.00172655	2.76282	53	1508	14	27543	FZD1,CNTN5,CADM1,PCDH17,SLITRK1,SLITRK6,APP,CBLN2,SLITRK3,PTPRD,GRID2,IL1RAP,NRXN1,GPC6
GO:BP	embryonic morphogenesis	GO:0048598	0.00176543	2.75315	641	1508	66	27543	EYA1,SATB2,PROX1,LAMB3,ACVR2A,LRP2,ITGA4,NEUROD1,FRZB,GNAS,GJA5,NOTCH2,TBX15,COL11A1,LMO4,MMP16,GJB5,FZD1,EXOC4,LRIG1,TENM4,EDNRA,SALL1,MTHFD1L,CITED2,TNFAIP3,EYA4,IPMK,PCDH15,BCR,HMGA2,SIX1,IRX1,RARB,GATA4,SLITRK6,HIRA,T,IFT140,FOXP4,TWSG1,BMPR2,GREM2,ELF5,FREM2,MBNL1,VCAM1,BMP8B,GRHL3,TCF21,GJA1,NAGLU,MYCN,HECTD1,JAG2,INHBA,MSX2,MEF2C,RSPO2,EXT1,SOS1,FBN2,ZIC3,ENAH,CHD7,COL2A1
GO:BP	hemopoiesis	GO:0030097	0.00187879	2.72612	970	1508	90	27543	DUSP10,IL2RA,PIP4K2A,ACVR2A,NFE2L2,RASGRP1,JAG1,SRC,PREX1,GNAS,TIPARP,PGLYRP4,PGLYRP3,NOTCH2,WWP1,SSBP3,CDK6,ETV6,PGLYRP1,SETD1A,KAT8,DOCK1,INPP4B,KIRREL3,RORA,CD109,CITED2,TNFAIP3,L3MBTL3,BCR,FBXO7,TPO,STON2,ZMIZ1,ANGPT1,NFAM1,PRKDC,RABL3,APP,PKNOX1,TWSG1,AHCTF1,SLC4A1,ITGB8,XRCC5,RABGAP1L,IFI204,GPR171,LYN,PTBP3,PABPC4,ZC3H12A,CSF3R,PRDM16,LFNG,PTPRZ1,ATXN1L,IRF8,ANLN,POU2AF1,TRAF3IP2,OSTM1,PRD…
GO:BP	embryo development ending in birth or egg hatching	GO:0009792	0.00190701	2.71965	804	1508	78	27543	EYA1,SATB2,ETL4,ACVR2A,LRP2,DHX35,GNAS,CHTOP,ARNT,OTUD7B,NOTCH2,TBX15,COL11A1,LMO4,MMP16,KDM4C,SSBP3,AGBL4,GJB5,FZD1,PSPH,SOX5,EDNRA,CNOT1,CCNB2,MTHFD1L,CITED2,IPMK,RTCB,SIX1,ZMIZ1,GATA4,ZFPM2,ANGPT1,ADCY9,PRKDC,T,IFT140,CELF4,NSDHL,NRK,BMPR2,TTLL4,SPEG,ST8SIA6,MBNL1,VCAM1,GRHL3,PAX7,MYO18B,LFNG,HEY2,PRDM1,GJA1,UPB1,BRCA1,TANC2,MYCN,HECTD1,ITPK1,JAG2,NCAPG2,CTS7,MEF2C,EXT1,COLEC10,ZFAT,GABPA,DSC3…
GO:BP	regulation of ion transport	GO:0043269	0.00195237	2.70944	723	1508	72	27543	OPRK1,HECW2,PLA2G4A,RGS7,KCNJ3,KCNH7,SPG11,GNAS,EDN3,ATP1A1,ANK2,AKAP9,DPP6,KCNIP4,CFTR,CRBN,GRM7,CACNA2D4,SYT8,SARAF,EDNRA,ARG1,AKAP7,ANK3,ADORA2A,ATP2B1,PAWR,SHISA6,HECW1,HTR1A,PDE4D,CACNA2D3,KCNV1,SHISA9,APP,KCNJ6,PDPK1,KCNH8,LHCGR,ADCYAP1,CASK,FGF13,HTR2C,ATP1A2,AKT3,CABP1,TRPA1,CACNA1E,RGS4,SYT13,KCNB1,P2RY1,LYN,ADCYAP1R1,CXCL12,SCNN1B,PRKCB,CACNG3,GSG1L,GJA1,SCN4A,DAPK1,MEF2C,EFHB,PRKCE,NRX…
GO:BP	blood vessel morphogenesis	GO:0048514	0.00197029	2.70547	643	1508	66	27543	EYA1,CXCR2,OLFR16,PROX1,LRP2,NFE2L2,JAG1,TIPARP,CD160,GJA5,NOTCH2,WARS2,HGF,EIF2AK3,PRCP,EDNRA,RORA,ANXA2,SASH1,CITED2,HMGA2,BCAS3,SIX1,NRXN3,PLK2,ZMIZ1,GATA4,ZFPM2,ANGPT1,HAS2,FMNL3,ROBO1,T,SMOC2,PDPK1,PKNOX1,AKT3,ITGB8,BMPR2,TNN,PPP1R16B,AGTR1B,ZC3H12A,MYO18B,KCTD10,PROK2,CXCL12,PRKCB,TCF21,HEY2,PRDM1,NUS1,GJA1,DCN,STAT3,BECN1,BRCA1,NTRK2,AGGF1,PTGER4,SOS1,NRXN1,TCF4,CHD7,PRKCA,CXCR4
GO:BP	positive regulation of nervous system development	GO:0051962	0.0020279	2.69295	340	1508	42	27543	EPHA4,LRP2,ADGRL3,LRRTM4,NTF3,TENM4,TPBG,RAB21,FLRT2,SLITRK1,SLITRK6,UBE2V2,ETV5,ROBO1,TIAM2,CBLN2,CASK,PLXNB3,DCX,TRPC5,MME,BMPR2,XRCC5,SYNDIG1,TGM2,SLITRK3,LYN,PTPRD,PTPRZ1,GRID2,CXCL12,NTRK2,OTP,SEMA5A,IL1RAP,EFNA5,NRXN1,BHLHB9,PIK3R1,EEF2K,CXCR4,LINGO2
GO:BP	blood circulation	GO:0008015	0.00212463	2.67272	514	1508	56	27543	CPS1,CXCR2,SLC4A3,MDM4,GNAS,EDN3,GJA5,ATP1A1,ANK2,SH3GL2,AKAP9,CFTR,PRCP,GLRX3,EDNRA,MYLK3,BCR,ADORA2A,ATP2B1,DSP,HTR1A,PDE4D,GATA4,ANGPT1,PPARA,APP,LNPEP,CBS,ADCYAP1,ADD3,FGF13,HTR2C,ATP1A2,TRPA1,BMPR2,RGS4,AGTR1B,SUCNR1,P2RY1,ZC3H12A,SCNN1B,HEY2,GJA1,CTNNA3,DOCK4,IMMP2L,TMEM161B,HMGCR,NCALD,EXT1,CHD7,ARHGEF12,PIK3R1,CXCR4,F2RL1,OCLN
GO:BP	regulation of nervous system development	GO:0051960	0.00214749	2.66807	527	1508	57	27543	EPHA4,DUSP10,LRP2,SEMA3D,HGF,ADGRL3,LRRTM4,NTF3,TENM4,LINGO1,ANXA2,TPBG,RAB21,HMGA2,FLRT2,RARB,SLITRK1,SLITRK6,UBE2V2,ETV5,ROBO1,TIAM2,TNFRSF21,DAAM2,ADCYAP1,CBLN2,CASK,FGF13,PLXNB3,DCX,TRPC5,MME,BMPR2,XRCC5,SYNDIG1,TGM2,SLITRK3,LYN,PTPRD,PTPRZ1,GRID2,CXCL12,HELT,HEY2,MYCN,NTRK2,OTP,SEMA5A,IL1RAP,EFNA5,NRXN1,BHLHB9,CHD7,PIK3R1,EEF2K,CXCR4,LINGO2
GO:BP	modulation of chemical synaptic transmission	GO:0050804	0.00219736	2.6581	645	1508	66	27543	PLCL1,ERBB4,EPHA4,SPG11,SRC,EDN3,SLC7A11,SLC24A2,NCDN,AKAP9,GRM8,GRM7,NTF3,STX1B,CNTNAP4,AKAP7,LAMA2,BCR,ADORA2A,GRIA1,SHISA6,SIPA1L1,NRXN3,MCTP1,HTR1A,PLK2,ERC2,PCDH17,SHISA9,IGSF11,MIRLET7C-1,APP,LRFN2,ADCYAP1,CELF4,DCC,CASK,CHRDL1,HTR2C,DLGAP4,MME,BCHE,RGS4,KCNB1,PFN2,P2RY1,PTPRD,GRIK3,SSH1,GIT2,GRID2,ERC1,MCTP2,PRKCB,CACNG3,GRIK2,STAT3,PSMC5,NTRK2,MEF2C,MIR9-2,GRID1,PTGER4,PRKCE,NRXN1,CACNB3
GO:BP	regulation of cellular protein metabolic process	GO:0032268	0.00222155	2.65334	2456	1508	189	27543	ST18,BOLL,PLCL1,ERBB4,IGFBP5,VIL1,DNAJB2,EPHA4,CAB39,DUSP10,PROX1,ACVR2A,DNAJC10,TFPI,RASGRP1,SRC,GNAS,CTSZ,EDN3,YTHDF3,BBS7,CHTOP,ARNT,ENSA,KDM4C,SH3GL2,AGBL4,KHDRBS1,ANKIB1,AKAP9,FZD1,HGF,PRKAG2,LIMCH1,TEC,FZD10,RABGEF1,AUTS2,EIF2AK3,VGLL4,CLEC4N,NTF3,AKAP13,KAT8,INSR,RBPMS,EDNRA,VPS35,N4BP1,CNOT1,CASP12,PDGFD,ANXA2,CCNB2,CD109,SPSB4,SASH1,PERP,TNFAIP3,MAP3K5,ENPP1,UBE2D1,ADORA2A,CRY1,FBXO7,PAW…
GO:BP	regulation of cell migration	GO:0030334	0.00224312	2.64915	932	1508	87	27543	TMEFF2,ERBB4,IGFBP5,CXCR2,ARPC2,VIL1,EPHA4,DUSP10,PROX1,NFE2L2,ITGA4,JAG1,SRC,EDN3,YTHDF3,LMO4,SEMA3D,HGF,LIMCH1,RABGEF1,NTF3,PRCP,DOCK1,INSR,UNC5D,EDNRA,PDGFD,ULK4,SASH1,CITED2,LAMA2,BCR,PAWR,NAV3,BCAS3,FLRT2,GCNT2,MCTP1,PDE4D,PLK2,DACH1,ANGPT1,HAS2,CD200R1,ROBO1,APP,SMOC2,PDPK1,DPYSL3,MCC,PLXNB3,AKT3,RAP2B,BMPR2,LAMC2,TNN,PFN2,IGSF10,UNC5C,LYN,AKIRIN1,ZC3H12A,SSH1,MET,PTPRZ1,CXCL12,NUS1,GJA1,DC…
GO:BP	regulation of trans-synaptic signaling	GO:0099177	0.00231991	2.63453	646	1508	66	27543	PLCL1,ERBB4,EPHA4,SPG11,SRC,EDN3,SLC7A11,SLC24A2,NCDN,AKAP9,GRM8,GRM7,NTF3,STX1B,CNTNAP4,AKAP7,LAMA2,BCR,ADORA2A,GRIA1,SHISA6,SIPA1L1,NRXN3,MCTP1,HTR1A,PLK2,ERC2,PCDH17,SHISA9,IGSF11,MIRLET7C-1,APP,LRFN2,ADCYAP1,CELF4,DCC,CASK,CHRDL1,HTR2C,DLGAP4,MME,BCHE,RGS4,KCNB1,PFN2,P2RY1,PTPRD,GRIK3,SSH1,GIT2,GRID2,ERC1,MCTP2,PRKCB,CACNG3,GRIK2,STAT3,PSMC5,NTRK2,MEF2C,MIR9-2,GRID1,PTGER4,PRKCE,NRXN1,CACNB3
GO:BP	development of primary female sexual characteristics	GO:0046545	0.0023294	2.63276	133	1508	23	27543	PLA2G4A,SRC,TIPARP,NOBOX,INSR,SLIT3,DACH1,ZFPM2,ANGPT1,LHCGR,ADCYAP1,GPR149,INHBB,BMPR1B,LFNG,ADCYAP1R1,KITL,IMMP2L,INHBA,LHFPL2,PTGER4,ERMP1,STAT5B
GO:BP	positive regulation of cellular protein metabolic process	GO:0032270	0.00233469	2.63177	1437	1508	122	27543	ST18,BOLL,ERBB4,DNAJB2,EPHA4,CAB39,PROX1,ACVR2A,RASGRP1,SRC,GNAS,EDN3,YTHDF3,BBS7,CHTOP,ARNT,AGBL4,KHDRBS1,ANKIB1,AKAP9,FZD1,HGF,PRKAG2,LIMCH1,TEC,FZD10,AUTS2,VGLL4,CLEC4N,NTF3,AKAP13,KAT8,INSR,RBPMS,EDNRA,VPS35,CASP12,PDGFD,ANXA2,SPSB4,SASH1,PERP,TNFAIP3,MAP3K5,UBE2D1,CRY1,PAWR,HMGA2,RNF144A,EGLN3,FBXO33,TCL1,NKD2,RNF180,PDE4D,PLK2,GATA4,ANGPT1,CSNK1E,UBE2V2,PRKDC,ROBO1,APP,EZR,PDPK1,TWSG1,ADCYA…
GO:BP	regulation of growth	GO:0040008	0.00251591	2.5993	701	1508	70	27543	ERBB4,IGFBP5,VIL1,DNAJB2,DUSP10,PROX1,UBE2E3,FRZB,GNAS,SGIP1,SEMA3D,TCHP,ALMS1,VGLL4,TEAD1,INSR,WRN,CCNB2,CITED2,ENPP1,RAB21,HMGA2,SLIT3,SIX1,SLC6A3,GATA4,ZFPM2,COL14A1,PPARA,SBF1,PRKDC,IGSF11,APP,EZR,EPB41L3,WDR36,SOCS6,FGF13,DCX,TRPC5,PPT1,MFSD2A,BMPR2,RGS4,PRDM11,TTL,PTCH2,ACACB,CXCL12,PRKCB,D7ERTD443E,EPM2A,HEY2,GJA1,CRK,STAT3,DIO3,KIF26A,INHBA,FBP1,MEF2C,GHR,PTGER4,SEMA5A,EFNA5,SMARCA2,CHD7,…
GO:BP	regulation of gene expression	GO:0010468	0.00274224	2.56189	5415	1508	370	27543	ST18,EYA1,SF3B1,BOLL,HSFY2,SATB2,ERBB4,IGFBP5,ZFP142,MDM4,SEC16B,PROX1,ANGEL2,ACVR2A,NFE2L2,NEUROD1,NUP35,ZFP804A,RASGRP1,JAG1,SRC,GNAS,NELFCD,CTSZ,EDN3,ZFP931,ZFHX4,YTHDF3,BBS7,MAML3,TIPARP,PGLYRP4,PGLYRP3,SETDB1,ARNT,OTUD7B,SF3B4,CD160,BCL9,NOTCH2,TBX15,CD2,PTBP2,MYOZ2,ANK2,LMO4,WWP1,MUP5,KDM4C,BNC2,SH3GL2,SSBP3,PHC2,ZFP362,KHDRBS1,PRAMEL5,CDK6,MTERF1B,FZD1,CDK14,DMTF1,HGF,CLNK,EPHA5,TCHP,SLC15…
GO:BP	regulation of cell adhesion	GO:0030155	0.00276325	2.55858	757	1508	74	27543	ARPC2,EPHA4,DUSP10,IL2RA,ITGA4,HSD17B12,RASGRP1,JAG1,SRC,PREX1,CD160,CDK6,LIMCH1,EPHA5,SLC7A1,MMRN1,FBLN2,MAGI1,DOCK1,CITED2,TNFAIP3,ARG1,LAMA2,ANK3,ADORA2A,PAWR,BCAS3,GCNT2,PDE4D,ZMIZ1,ANGPT1,HAS2,PPARA,ST6GAL1,SMOC2,TNFRSF21,TWSG1,SPINK5,SOCS6,CASK,PLXNB3,VSIG4,ARHGAP6,SERPINI2,SLC4A1,TNN,KIF26B,APBB1IP,TGM2,VCAM1,LYN,ZC3H12A,DMP1,PTPRZ1,CXCL12,ITGAL,ERBB3,CRK,TBCD,JAG2,SPOCK1,EDIL3,AP3B1,PTGER…
GO:BP	organonitrogen compound catabolic process	GO:1901565	0.00288146	2.54039	1296	1508	112	27543	HECW2,USP37,DNAJB2,EPHA4,MDM4,PLA2G4A,EDEM3,DTL,NFE2L2,DNAJC10,CTSZ,PDE7A,BBS7,TIPARP,PGLYRP4,PGLYRP3,CTSK,OTUD7B,RNF115,SEC22B,DPYD,WWP1,AGBL4,PSMB2,ANKIB1,UBE3C,RMND5A,CRBN,EDEM1,VGLL4,PGLYRP1,ABHD13,CLN8,VPS35,N4BP1,GOT2,ANXA2,SPSB4,TNFAIP3,PDE7B,MOXD1,ARG1,UBE2D1,GGT1,FBXO7,NPEPPS,RNF144A,FBXO33,SEL1L,GALC,HECW1,SLC6A3,NKD2,CAST,RNF180,PDE4D,PLK2,FHIT,SIAH3,CSNK1E,UBE2V2,PSMD2,APP,EZR,LNPEP,C…
GO:BP	positive regulation of transcription by RNA polymerase II	GO:0045944	0.00317205	2.49866	1284	1508	111	27543	ST18,EYA1,SATB2,ZFP142,PROX1,ACVR2A,NFE2L2,NEUROD1,JAG1,MAML3,ARNT,BCL9,LMO4,SSBP3,DMTF1,AUTS2,NOBOX,NTF3,ETV6,ARNTL2,TEAD1,ZFP668,KAT8,SALL1,RORA,ANXA2,MYO6,PLAGL1,CITED2,HMGA2,BCAS3,MYT1L,ETV1,SIX1,KLF6,GCM2,GPBP1,RARB,ZMIZ1,GATA4,TSC22D1,ZFPM2,PPARA,PRKDC,ETV5,APP,T,PKNOX1,ADCYAP1,ASXL3,RIT2,ABLIM3,CASK,MACC1,BMPR2,IFI204,SMYD3,ELF5,WWTR1,P2RY1,BMPR1B,GLIS1,AKIRIN1,MTF1,ZC3H12A,GRHL3,PAX7,CAMT…
GO:BP	regulation of presynapse organization	GO:0099174	0.00327425	2.48489	41	1508	12	27543	FZD1,VPS35,SLITRK1,SLITRK6,APP,CBLN2,SLITRK3,PTPRD,GRID2,IL1RAP,NRXN1,GPC6
GO:BP	response to growth factor	GO:0070848	0.00350038	2.45589	721	1508	71	27543	CPS1,ERBB4,ARPC2,VIL1,ACVR2A,LRP2,SRC,DOK5,FAT4,NOTCH2,SH3GL2,FZD1,HGF,NTF3,SOX5,INSR,ZFP423,PDGFD,CD109,CITED2,ARG1,WASF1,FLRT2,GCNT2,ZMIZ1,GATA4,ANGPT1,HAS2,CSNK1E,PPARA,FSTL1,ROBO1,APP,SMOC2,RGMB,PDPK1,TWSG1,CASK,CHRDL1,ITGB8,BMPR2,GREM2,STMN2,P2RY1,VCAM1,BMPR1B,BMP8B,PRDM16,PRKCB,NUS1,DCN,GRB10,CRK,STAT3,BECN1,MSX2,NTRK2,MEF2C,ADAMTS12,EXT1,SNAI2,SOS1,PRKCE,NRXN1,BAMBI,FBN2,TCF4,EEF2K,STAT5B,…
GO:BP	cation transport	GO:0006812	0.0035211	2.45332	1185	1508	104	27543	OPRK1,HECW2,SLC41A1,RGS7,KCNT1,KCNJ3,KCNH7,LRP2,SPG11,GNAS,EDN3,KCNN3,ANXA9,GJA5,ATP1A1,ANK2,CNGB3,SLC24A2,AKAP9,DPP6,KCNIP4,TMEM175,COX6A1,SLC15A4,SLC7A1,CFTR,SLC41A3,CRBN,GRM7,CACNA2D4,SLC1A5,SYT8,SARAF,EDNRA,ANXA2,ARG1,AKAP7,ANK3,ADORA2A,ATP2B1,PAWR,SHISA6,HECW1,SLC6A3,SLC6A18,SLC12A7,HTR1A,PDE4D,CACNA2D3,KCNV1,SLC38A2,SLC38A4,SHISA9,APP,KCNJ6,PDPK1,KCNH8,LHCGR,ADCYAP1,TRPM3,CASK,FGF13,TRPC5,H…
GO:BP	chemical homeostasis	GO:0048878	0.00358547	2.44545	1099	1508	98	27543	OPRK1,CPS1,ERBB4,IGFBP5,SLC4A3,SLC41A1,PLA2G4A,OLFR16,MALRD1,NEUROD1,GNAS,EDN3,CYP7B1,SLC7A11,ATP1A1,ANK2,MUP5,SLC24A2,STEAP1,EPHA5,TMEM175,CFTR,RAB11FIP5,ALMS1,PRCP,GLRX3,INSR,CLN8,EDNRA,INPP4B,RORA,LIPC,ENPP1,ANK3,ADORA2A,CRY1,ATP2B1,GRIA1,ACACA,ADCK1,GCM2,SLC12A7,PDE4D,GATA4,CPB2,HAS2,APP,PDPK1,PNPLA1,LHCGR,INS1,GM6377,TRPC5,HTR2C,ATP1A2,PPT1,SLC4A1,TRPA1,ACOXL,SLC24A3,TGM2,KCNB1,SUCNR1,P2RY1,…
GO:BP	metal ion transport	GO:0030001	0.00416164	2.38074	904	1508	84	27543	OPRK1,HECW2,SLC41A1,RGS7,KCNT1,KCNJ3,KCNH7,LRP2,SPG11,GNAS,EDN3,KCNN3,ANXA9,GJA5,ATP1A1,ANK2,SLC24A2,AKAP9,DPP6,KCNIP4,TMEM175,CFTR,CRBN,GRM7,CACNA2D4,SARAF,EDNRA,ANXA2,AKAP7,ANK3,ADORA2A,ATP2B1,PAWR,HECW1,SLC6A3,SLC6A18,SLC12A7,PDE4D,CACNA2D3,KCNV1,SLC38A2,SLC38A4,KCNJ6,PDPK1,KCNH8,LHCGR,ADCYAP1,CASK,FGF13,TRPC5,HTR2C,ATP1A2,AKT3,CABP1,TRPA1,CACNA1E,RGS4,SLC24A3,KCNB1,LYN,ADCYAP1R1,CXCL12,ITPR2,…
GO:BP	chemotaxis	GO:0006935	0.00417185	2.37967	617	1508	63	27543	CXCR2,CXCR1,EPHA4,OLFR16,LRP2,PREX1,EDN3,CYP7B1,PIP5K1A,SEMA3D,HGF,CRMP1,EPHA5,NTF3,UNC5D,EDNRA,PDGFD,CNTN5,TPBG,ITGA9,LAMA2,ANK3,KIF5A,SLIT3,ETV1,FLRT2,PDE4D,ANGPT1,EFCAB1,ST6GAL1,ALCAM,ROBO1,ROBO2,APP,SMOC2,DCC,PLXNB3,BMPR2,AGTR1B,SUCNR1,VCAM1,UNC5C,BMPR1B,LYN,AKIRIN1,CSF3R,MET,PROK2,CXCL12,CRK,ETV4,DOCK4,MEF2C,MIR9-2,SEMA5A,EXT1,COLEC10,SNAI2,RETNLG,EFNA5,ENAH,CXCR4,F2RL1
GO:BP	ion transport	GO:0006811	0.00459765	2.33746	1591	1508	131	27543	OPRK1,HECW2,SLC4A3,SLC41A1,PLA2G4A,RGS7,KCNT1,KCNJ3,KCNH7,LRP2,SPG11,GNAS,ATP5E,EDN3,SLC7A11,KCNN3,ANXA9,GJA5,ATP1A1,ANK2,CNGB3,SLC7A13,SLC24A2,AKAP9,STEAP1,DPP6,KCNIP4,GABRA2,TMEM175,COX6A1,SLC15A4,SLC7A1,CFTR,SLC41A3,CRBN,GRM7,CACNA2D4,SLC1A5,SYT8,CLN8,SARAF,EDNRA,ANXA2,ENPP1,ARG1,AKAP7,ANK3,ADORA2A,ATP2B1,PAWR,GLRA1,GRIA1,SHISA6,HECW1,SLC6A3,SLC6A18,SLC12A7,HTR1A,PDE4D,CACNA2D3,KCNV1,SLC38A2,S…
GO:BP	regulation of cell motility	GO:2000145	0.00460776	2.33651	991	1508	90	27543	TMEFF2,ERBB4,IGFBP5,CXCR2,ARPC2,VIL1,EPHA4,DUSP10,PROX1,NFE2L2,ITGA4,JAG1,SRC,EDN3,YTHDF3,LMO4,CFAP69,SEMA3D,HGF,LIMCH1,RABGEF1,NTF3,PRCP,DOCK1,INSR,UNC5D,EDNRA,PDGFD,ULK4,SASH1,CITED2,ARHGAP18,LAMA2,BCR,PAWR,NAV3,BCAS3,FLRT2,GCNT2,MCTP1,PDE4D,PLK2,DACH1,ANGPT1,HAS2,EFCAB1,CD200R1,ROBO1,APP,SMOC2,PDPK1,DPYSL3,MCC,PLXNB3,AKT3,RAP2B,BMPR2,LAMC2,TNN,PFN2,IGSF10,UNC5C,LYN,AKIRIN1,ZC3H12A,SSH1,MET,PTP…
GO:BP	taxis	GO:0042330	0.00464716	2.33281	619	1508	63	27543	CXCR2,CXCR1,EPHA4,OLFR16,LRP2,PREX1,EDN3,CYP7B1,PIP5K1A,SEMA3D,HGF,CRMP1,EPHA5,NTF3,UNC5D,EDNRA,PDGFD,CNTN5,TPBG,ITGA9,LAMA2,ANK3,KIF5A,SLIT3,ETV1,FLRT2,PDE4D,ANGPT1,EFCAB1,ST6GAL1,ALCAM,ROBO1,ROBO2,APP,SMOC2,DCC,PLXNB3,BMPR2,AGTR1B,SUCNR1,VCAM1,UNC5C,BMPR1B,LYN,AKIRIN1,CSF3R,MET,PROK2,CXCL12,CRK,ETV4,DOCK4,MEF2C,MIR9-2,SEMA5A,EXT1,COLEC10,SNAI2,RETNLG,EFNA5,ENAH,CXCR4,F2RL1
GO:BP	cellular response to hormone stimulus	GO:0032870	0.00481703	2.31722	633	1508	64	27543	CPS1,PIP4K2A,NFE2L2,TFPI,SRC,GNAS,CYP7B1,ATP1A1,MUP5,EPHA5,AKAP13,PRCP,INSR,EDNRA,CNOT1,ENPP1,ARG1,CRY1,ATP2B1,LGR5,HMGA2,SLIT3,ACACA,BCAS3,RARB,ZMIZ1,GATA4,PPARA,PRKDC,ARID1B,PDPK1,LHCGR,ADCYAP1,ATP1A2,AKT3,INHBB,SMYD3,AGTR1B,C2CD5,SCNN1B,PRKCB,PTPRE,TCF21,GJA1,GRB10,CRK,STAT3,BRCA1,INHBA,NTRK2,FBP1,MEF2C,NAIP1,GHR,PTGER4,SAFB2,EFNA5,PRKCE,PIK3R1,EEF2K,SCNN1G,STAT5B,KMT2D,ACSL1
GO:BP	regulation of neuron projection development	GO:0010975	0.00493258	2.30693	528	1508	56	27543	HECW2,EPHA4,NFE2L2,ZFP804A,CTSZ,PLPPR5,FZD1,SEMA3D,HGF,CRMP1,STX1B,FAT3,NTM,ULK4,FBXO7,RAB21,SIPA1L1,HECW1,SLITRK1,TWF1,UBE2V2,ROBO1,TIAM2,ADCYAP1,RIT2,DPYSL3,DCC,CASK,FGF13,PLXNB3,DCX,TRPC5,MFSD2A,BMPR2,TNN,MARK1,STMN2,LYN,PTPRD,TMEM106B,PTPRZ1,GRID2,CXCL12,PMP22,CRK,TANC2,SPOCK1,NTRK2,ARSB,SEMA5A,CSMD3,EFNA5,THOC2,BHLHB9,RUNX1T1,EEF2K
GO:BP	axonogenesis	GO:0007409	0.00502967	2.29846	464	1508	51	27543	EPHA4,LRP2,ITGA4,SPG11,EDN3,SEMA3D,CRMP1,EPHA5,AUTS2,NTF3,UNC5D,EDNRA,CNTN5,LAMA2,ANK3,RAB21,KIF5A,SLIT3,CNTNAP1,ETV1,SIPA1L1,FLRT2,SLITRK1,SLITRK6,ALCAM,ROBO1,ROBO2,APP,TIAM2,WDR36,DCC,FGF13,PLXNB3,DCX,TRPC5,BMPR2,TNN,TTL,SLITRK3,UNC5C,BMPR1B,PTPRZ1,CXCL12,ETV4,NTRK2,MEF2C,MIR9-2,SEMA5A,EXT1,EFNA5,ENAH
GO:BP	axon development	GO:0061564	0.00522374	2.28202	516	1508	55	27543	EPHA4,LRP2,ITGA4,SPG11,EDN3,SEMA3D,CRMP1,EPHA5,AUTS2,GRM7,NTF3,UNC5D,EDNRA,CNTN5,LAMA2,ANK3,RAB21,KIF5A,SLIT3,CNTNAP1,ETV1,SIPA1L1,FLRT2,SLITRK1,SLITRK6,ALCAM,ROBO1,ROBO2,NCAM2,APP,TIAM2,TNFRSF21,EPB41L3,WDR36,DCC,FGF13,PLXNB3,DCX,TRPC5,BMPR2,TNN,TTL,SLITRK3,UNC5C,BMPR1B,PTPRZ1,CXCL12,ETV4,NTRK2,MEF2C,MIR9-2,SEMA5A,EXT1,EFNA5,ENAH
GO:BP	immune system development	GO:0002520	0.0052715	2.27807	1080	1508	96	27543	DUSP10,IL2RA,PIP4K2A,ACVR2A,NFE2L2,RASGRP1,JAG1,SRC,PREX1,GNAS,TIPARP,PGLYRP4,PGLYRP3,NOTCH2,LMO4,WWP1,SSBP3,CDK6,SLC15A4,ETV6,PGLYRP1,SETD1A,KAT8,DOCK1,INPP4B,KIRREL3,RORA,CCNB2,CD109,CITED2,TNFAIP3,L3MBTL3,BCR,FBXO7,TPO,SIX1,STON2,ZMIZ1,ANGPT1,NFAM1,PRKDC,RABL3,APP,PKNOX1,TWSG1,AHCTF1,CTNNBL1,SLC4A1,ITGB8,XRCC5,RABGAP1L,IFI204,GPR171,LYN,PTBP3,PABPC4,ZC3H12A,CSF3R,PRDM16,LFNG,PTPRZ1,ATXN1L,IRF8…
GO:BP	regulation of transmembrane transport	GO:0034762	0.00533547	2.27283	595	1508	61	27543	OPRK1,HECW2,ERBB4,RGS7,KCNJ3,KCNH7,NFE2L2,EDN3,ANK2,AKAP9,DPP6,KCNIP4,CFTR,CRBN,CACNA2D4,INSR,EDNRA,ENPP1,ARG1,AKAP7,ANK3,SHISA6,HECW1,PDE4D,CACNA2D3,KCNV1,SHISA9,APP,KCNJ6,PDPK1,KCNH8,LHCGR,FGF13,ATP1A2,CABP1,CACNA1E,RGS4,OPN3,KCNB1,LYN,ADCYAP1R1,KLF15,C2CD5,PRKCB,CACNG3,GSG1L,GJA1,ERBB3,GRB10,SCN4A,DAPK1,MEF2C,PRKCE,NRXN1,KCNV2,CHD7,CACNB3,AHNAK,TMEM109,ACSL1,OCLN
GO:BP	bone development	GO:0060348	0.00546594	2.26234	247	1508	33	27543	PIP4K2A,SRC,GNAS,FAT4,NOTCH2,MMP16,BNC2,AKAP13,VKORC1,CSGALNACT1,CADM1,CITED2,FOXN3,RARB,HAS2,T,CBS,BMPR2,TNN,RABGAP1L,TGM2,BMPR1B,GJA1,CTC1,MSX2,MEF2C,GHR,PTGER4,ADAMTS12,EXT1,CCDC154,PLS3,COL2A1
GO:BP	regulation of cell population proliferation	GO:0042127	0.00569971	2.24415	1764	1508	142	27543	ST18,EYA1,ERBB4,IGFBP5,CXCR2,DNAJB2,EPHA4,MDM4,PLA2G4A,DUSP10,PROX1,IL2RA,LRP2,ITGA4,FRZB,JAG1,GNAS,CTSZ,EDN3,CYP7B1,SLC7A11,CHTOP,NOTCH2,PTBP2,KDM4C,SSBP3,AGBL4,PRAMEL5,CDK6,SLC7A1,VGLL4,NTF3,SETD1A,INSR,EDNRA,ZFP423,PDGFD,ANXA2,CD109,TPBG,CITED2,TNFAIP3,MAP3K5,ARG1,ADORA2A,PAWR,LGR5,HMGA2,SLIT3,EGLN3,SIX1,TCL1,PRL7B1,GCNT2,PDE4D,RARB,ZMIZ1,GATA4,CPB2,DACH1,ZFPM2,ANGPT1,HAS2,PRKDC,ETV5,ST6GAL1,R…
GO:BP	adult behavior	GO:0030534	0.00591872	2.22777	171	1508	26	27543	OPRK1,EPHA4,SLC7A11,GRM7,CLN8,ULK4,PCDH15,GLRA1,NRXN3,RNF180,PCDH17,KLHL1,SLITRK1,SLITRK6,PPARA,APP,HTR2C,ATP1A2,PPT1,CTNS,SEZ6L,ALDH2,CXCL12,NRXN1,CHD7,SEZ6L2
GO:BP	axon guidance	GO:0007411	0.00597923	2.22335	248	1508	33	27543	EPHA4,LRP2,EDN3,SEMA3D,CRMP1,EPHA5,NTF3,UNC5D,EDNRA,CNTN5,LAMA2,ANK3,KIF5A,SLIT3,ETV1,FLRT2,ALCAM,ROBO1,ROBO2,APP,DCC,PLXNB3,BMPR2,UNC5C,BMPR1B,CXCL12,ETV4,MEF2C,MIR9-2,SEMA5A,EXT1,EFNA5,ENAH
GO:BP	neuron migration	GO:0001764	0.00617877	2.2091	182	1508	27	27543	SATB2,ASTN1,ASTN2,ADGRL3,AUTS2,UNC5D,FAT3,KIRREL3,ULK4,OLIG3,FLRT2,ZMIZ1,DCC,FGF13,DCX,TNN,SDCCAG8,MARK1,IGSF10,PTPRZ1,CXCL12,GJA1,CRK,STAT3,NTRK2,MEF2C,CXCR4
GO:BP	negative regulation of cellular metabolic process	GO:0031324	0.0063773	2.19536	2670	1508	200	27543	ST18,BOLL,SATB2,IGFBP5,VIL1,DNAJB2,EPHA4,MDM4,DUSP10,PROX1,ANGEL2,MALRD1,PIP4K2A,DNAJC10,TFPI,SRC,NELFCD,CTSZ,YTHDF3,SETDB1,ENSA,OTUD7B,SEC22B,NOTCH2,TBX15,ATP1A1,PTBP2,MYOZ2,WWP1,MUP5,KDM4C,SH3GL2,PHC2,KHDRBS1,PRAMEL5,CDK6,FZD1,HGF,PRKAG2,SFSWAP,RABGEF1,MDFIC,EIF2AK3,SHQ1,LMCD1,VGLL4,NTF3,ETV6,SOX5,ZFP668,KAT8,INSR,ISX,VPS35,N4BP1,ZFP423,SALL1,CNOT1,TLE3,ANXA2,CD109,ZBTB2,CITED2,TNFAIP3,OLIG3,EN…
GO:BP	regulation of intracellular signal transduction	GO:1902531	0.00653547	2.18472	1617	1508	132	27543	OPRK1,ERBB4,IGFBP5,EPHA4,MDM4,DUSP10,PROX1,LRP2,NFE2L2,RASGRP1,SRC,DOK5,GNAS,EDN3,OTUD7B,NOTCH2,MYOZ2,ALPK1,MUP5,HGF,SLC15A4,FZD10,RABGEF1,AUTS2,SLC7A1,MDFIC,EXOC4,ZC3HAV1,EIF2AK3,LMCD1,VGLL4,CLEC4N,VWF,NTF3,AKAP13,INSR,NR3C2,EDNRA,INPP4B,PDGFD,RORA,CGNL1,TPBG,RASA2,ULK4,SASH1,TNFAIP3,MAP3K5,AKAP7,ARHGAP18,BCR,CRY1,RALGAPA1,SIPA1L1,GCNT2,PAK1IP1,ADGRV1,PDE4D,GATA4,ANGPT1,PPARA,TRAP1,1810013L24RIK…
GO:BP	neuron projection guidance	GO:0097485	0.00653671	2.18464	249	1508	33	27543	EPHA4,LRP2,EDN3,SEMA3D,CRMP1,EPHA5,NTF3,UNC5D,EDNRA,CNTN5,LAMA2,ANK3,KIF5A,SLIT3,ETV1,FLRT2,ALCAM,ROBO1,ROBO2,APP,DCC,PLXNB3,BMPR2,UNC5C,BMPR1B,CXCL12,ETV4,MEF2C,MIR9-2,SEMA5A,EXT1,EFNA5,ENAH
GO:BP	eye development	GO:0001654	0.00721703	2.14164	419	1508	47	27543	CRYGF,CRB1,PROX1,NEUROD1,JAG1,BBS7,SLC7A11,NOTCH2,OLFM3,ALMS1,CLN8,TENM3,FAT3,CITED2,ATP2B1,SIX6,SLC6A3,RARB,SLITRK6,IFT140,PKNOX1,OPN5,TWSG1,CELF4,CHRDL1,DCX,NHS,MFSD2A,NDP,CTNS,BMPR2,INHBB,FREM2,BMPR1B,GRHL3,PRDM1,GJA1,STAT3,NAGLU,DIO3,INHBA,NTRK2,SOS1,RAB18,FBN2,CHD7,ABCB5
GO:BP	regulation of GTPase activity	GO:0043087	0.00792025	2.10126	346	1508	41	27543	EPHA4,RGS7,RASGRP1,PREX1,GNAS,PIP5K1A,EPHA5,FZD10,NTF3,TBC1D2B,RASA2,BCR,BCAS3,RALGAPA1,SIPA1L1,RAPGEF5,SBF1,TIAM2,ADCYAP1,PLXNB3,ARHGAP6,ARHGEF26,RABGAP1L,RGS4,PKP4,TGM2,GRHL3,EVI5,SGSM1,MET,CRK,PTPRN2,NTRK2,WDR41,IQGAP2,ASAP1,EFNA5,SOS1,IQSEC1,PYCARD,F2RL1
GO:BP	blood vessel development	GO:0001568	0.00802697	2.09545	738	1508	71	27543	EYA1,CXCR2,OLFR16,PROX1,LRP2,NFE2L2,JAG1,TIPARP,CD160,GJA5,NOTCH2,WARS2,HGF,EIF2AK3,PRCP,EDNRA,PDGFD,RORA,ANXA2,SASH1,CITED2,HMGA2,BCAS3,SIX1,NRXN3,PLK2,ZMIZ1,GATA4,ZFPM2,ANGPT1,HAS2,FMNL3,ROBO1,T,SMOC2,PDPK1,PKNOX1,NSDHL,AKT3,ITGB8,BMPR2,TNN,PPP1R16B,AGTR1B,ZC3H12A,MYO18B,KCTD10,PROK2,CXCL12,DCTN5,PRKCB,TCF21,HEY2,PRDM1,NUS1,GJA1,DCN,STAT3,BECN1,BRCA1,HECTD1,NTRK2,MEF2C,AGGF1,PTGER4,SOS1,NRXN1,T…
GO:BP	visual system development	GO:0150063	0.00877212	2.0569	422	1508	47	27543	CRYGF,CRB1,PROX1,NEUROD1,JAG1,BBS7,SLC7A11,NOTCH2,OLFM3,ALMS1,CLN8,TENM3,FAT3,CITED2,ATP2B1,SIX6,SLC6A3,RARB,SLITRK6,IFT140,PKNOX1,OPN5,TWSG1,CELF4,CHRDL1,DCX,NHS,MFSD2A,NDP,CTNS,BMPR2,INHBB,FREM2,BMPR1B,GRHL3,PRDM1,GJA1,STAT3,NAGLU,DIO3,INHBA,NTRK2,SOS1,RAB18,FBN2,CHD7,ABCB5
GO:BP	positive regulation of signal transduction	GO:0009967	0.00908629	2.04161	1537	1508	126	27543	OPRK1,ERBB4,IGFBP5,EPHA4,PROX1,ACVR2A,LRP2,RASGRP1,JAG1,SRC,DOK5,GNAS,EDN3,NOTCH2,ALPK1,MUP5,HGF,SLC15A4,FZD10,AUTS2,EXOC4,ZC3HAV1,LMCD1,CLEC4N,VWF,NTF3,AKAP13,STX1B,INSR,RBPMS,NR3C2,EDNRA,VPS35,ZFP423,SALL1,PDGFD,TPBG,SASH1,CITED2,TNFAIP3,MAP3K5,WASF1,ADORA2A,LGR5,PRL7B1,GCNT2,ADGRV1,DEPDC1B,ZMIZ1,GATA4,ANGPT1,CSNK1E,NFAM1,IGSF11,ROBO1,APP,SMOC2,DAAM2,TWSG1,LHCGR,ADCYAP1,RIT2,MBD2,DCC,NRK,HTR2C,…
GO:BP	regulation of phosphorylation	GO:0042325	0.00913319	2.03938	1284	1508	109	27543	PLCL1,ERBB4,EPHA4,CAB39,DUSP10,PROX1,PIP4K2A,ACVR2A,DNAJC10,RASGRP1,SRC,GNAS,EDN3,EEF1A2,LMO4,SH3GL2,AKAP9,FZD1,HGF,PRKAG2,LIMCH1,TEC,EPHA5,FZD10,RABGEF1,CLEC4N,NTF3,AKAP13,INSR,RBPMS,EDNRA,PDGFD,ANXA2,CCNB2,CD109,SASH1,TNFAIP3,MAP3K5,ENPP1,ADORA2A,FBXO7,HMGA2,TCL1,PDE4D,GATA4,ANGPT1,PPARA,TWF1,PRKDC,ROBO1,APP,PDPK1,CBS,TWSG1,ADCYAP1,RIT2,SOCS6,FGF13,TRPC5,RAP2B,SLC4A1,STRADB,BMPR2,CCNYL1,XRCC5,I…
GO:BP	forebrain development	GO:0030900	0.00935614	2.0289	423	1508	47	27543	PGAP1,SATB2,ERBB4,ATIC,PROX1,LRP2,NEUROD1,BTBD3,SRC,FAT4,SLC7A11,HSD3B1,HTR5A,EPHA5,SALL1,KIRREL3,ULK4,HMGA2,SLC6A3,RARB,ZMIZ1,DNAH5,TRAPPC9,SLC38A2,ROBO1,APP,TWSG1,ADCYAP1,SALL3,FGF13,DCX,ATP1A2,MFSD2A,INHBB,HSD3B5,CXCL12,CRK,INHBA,NTRK2,MIR9-2,OTP,SEMA5A,EXT1,D16ERTD472E,CEP120,CHD7,CXCR4
GO:BP	female sex differentiation	GO:0046660	0.00981498	2.00811	165	1508	25	27543	PLA2G4A,LRP2,SRC,TIPARP,NOBOX,INSR,SLIT3,DACH1,ZFPM2,ANGPT1,LHCGR,ADCYAP1,GPR149,INHBB,BMPR1B,LFNG,ADCYAP1R1,KITL,IMMP2L,INHBA,LHFPL2,PTGER4,ERMP1,CHD7,STAT5B
GO:BP	regulation of presynapse assembly	GO:1905606	0.0102615	1.98879	38	1508	11	27543	FZD1,SLITRK1,SLITRK6,APP,CBLN2,SLITRK3,PTPRD,GRID2,IL1RAP,NRXN1,GPC6
GO:BP	vasculature development	GO:0001944	0.0103382	1.98556	771	1508	73	27543	EYA1,CXCR2,OLFR16,PROX1,LRP2,NFE2L2,JAG1,TIPARP,CD160,GJA5,NOTCH2,WARS2,HGF,EIF2AK3,PRCP,EDNRA,PDGFD,RORA,ANXA2,SASH1,CITED2,HMGA2,BCAS3,SIX1,NRXN3,PLK2,ZMIZ1,GATA4,ZFPM2,ANGPT1,HAS2,FMNL3,ROBO1,T,SMOC2,PDPK1,PKNOX1,NSDHL,AKT3,ITGB8,NDP,BMPR2,TNN,PPP1R16B,AGTR1B,ZC3H12A,MYO18B,KCTD10,PROK2,CXCL12,DCTN5,PRKCB,TCF21,HEY2,PRDM1,NUS1,GJA1,DCN,STAT3,BECN1,BRCA1,IMMP2L,HECTD1,NTRK2,MEF2C,AGGF1,PTGER4,S…
GO:BP	postsynapse organization	GO:0099173	0.0104642	1.98029	209	1508	29	27543	EPHA4,ZFP804A,SLC7A11,EPHA5,LRRTM4,INSR,SORBS2,VPS35,CADM1,SHISA6,CNTNAP1,SIPA1L1,HTR1A,ETV5,APP,LRFN2,CRIPT,CASK,CHRDL1,FRMPD4,SLITRK3,PTPRD,SSH1,GRID2,TANC2,IL1RAP,NRXN1,BHLHB9,EEF2K
GO:BP	regulation of organelle organization	GO:0033043	0.0107527	1.96848	1142	1508	99	27543	TMEFF2,HECW2,ARPC2,VIL1,PLA2G4A,PROX1,PIP4K2A,SRC,EDN3,PDE4DIP,SEC22B,NOTCH2,SNX7,AKAP9,HGF,LIMCH1,EPHA5,TCHP,FZD10,BAZ1B,CAPZA2,ALMS1,NTF3,AKAP13,TMEM135,INSR,VPS35,MYLK3,CNOT1,CGNL1,SYNE1,ARHGAP18,WASF1,ZWINT,FBXO7,NAV3,BCAS3,TRAPPC12,SIPA1L1,YLPM1,ADCK1,MAK,TRIP13,HTR1A,PLK2,TWF1,EZR,IFT140,DAAM2,CRIPT,ADD3,FGF13,ARHGAP6,XRCC5,RGS4,SDCCAG8,DSTN,ARHGAP40,STMN2,PFN2,SMC2,PTPRD,GRHL3,SSH1,ANAPC7,…
GO:BP	negative regulation of signal transduction	GO:0009968	0.0112416	1.94917	1231	1508	105	27543	EYA1,IGFBP5,EPHA4,MDM4,RGS7,DUSP10,PIP4K2A,LRP2,NFE2L2,NEUROD1,FRZB,SRC,YTHDF3,CYP7B1,OTUD7B,RNF115,CD160,MYOZ2,RGS3,FZD1,HGF,RABGEF1,VGLL4,CNOT1,TLE3,RORA,CGNL1,CD109,TPBG,RASA2,TNFAIP3,EYA4,ENPP1,ARG1,BICC1,CRY1,PAWR,HMGA2,SLIT3,SHISA6,PAK1IP1,NKD2,PDE4D,GATA4,CSNK1E,PPARA,FAIM2,TRAP1,1810013L24RIK,ROBO1,APP,EZR,PDPK1,TWSG1,CELF4,MCC,SALL3,SOCS6,CHRDL1,STRADB,TNN,RGS4,GREM2,TANK,SLC35C1,WWTR1,L…
GO:BP	cardiac chamber development	GO:0003205	0.0115702	1.93666	188	1508	27	27543	MDM4,PROX1,XIRP2,LRP2,JAG1,GJA5,NOTCH2,COL11A1,ANK2,LMO4,FZD1,EDNRA,CITED2,SLIT3,DSP,GATA4,ZFPM2,BMPR2,DCTN5,HEY2,PRDM1,HECTD1,DNAH11,MSX2,MEF2C,SOS1,CHD7
GO:BP	positive regulation of protein modification process	GO:0031401	0.0117941	1.92833	1043	1508	92	27543	ERBB4,DNAJB2,EPHA4,CAB39,PROX1,ACVR2A,RASGRP1,SRC,GNAS,EDN3,CHTOP,ARNT,AKAP9,FZD1,HGF,PRKAG2,LIMCH1,TEC,FZD10,AUTS2,CLEC4N,NTF3,AKAP13,KAT8,INSR,RBPMS,EDNRA,PDGFD,ANXA2,SPSB4,SASH1,MAP3K5,UBE2D1,CRY1,PAWR,HMGA2,FBXO33,TCL1,RNF180,PDE4D,GATA4,ANGPT1,UBE2V2,ROBO1,APP,PDPK1,TWSG1,ADCYAP1,FGF13,TRPC5,RAP2B,STRADB,BMPR2,CCNYL1,XRCC5,INHBB,SMYD3,TANK,PPP1R16B,PFN2,P2RY1,BMPR1B,LYN,TRABD2B,BMP8B,ZC3H12A…
GO:BP	sensory system development	GO:0048880	0.0120726	1.9182	427	1508	47	27543	CRYGF,CRB1,PROX1,NEUROD1,JAG1,BBS7,SLC7A11,NOTCH2,OLFM3,ALMS1,CLN8,TENM3,FAT3,CITED2,ATP2B1,SIX6,SLC6A3,RARB,SLITRK6,IFT140,PKNOX1,OPN5,TWSG1,CELF4,CHRDL1,DCX,NHS,MFSD2A,NDP,CTNS,BMPR2,INHBB,FREM2,BMPR1B,GRHL3,PRDM1,GJA1,STAT3,NAGLU,DIO3,INHBA,NTRK2,SOS1,RAB18,FBN2,CHD7,ABCB5
GO:BP	vascular process in circulatory system	GO:0003018	0.0123867	1.90704	222	1508	30	27543	CPS1,CXCR2,EDN3,GJA5,SH3GL2,CFTR,EDNRA,MYLK3,BCR,ADORA2A,ATP2B1,HTR1A,ANGPT1,CBS,ADCYAP1,ADD3,SLC16A2,HTR2C,ATP1A2,MFSD2A,BMPR2,AGTR1B,P2RY1,SCNN1B,GJA1,DOCK4,HMGCR,EXT1,F2RL1,OCLN
GO:BP	cell-substrate adhesion	GO:0031589	0.0127279	1.89524	365	1508	42	27543	TMEFF2,ARPC2,LAMB3,ITGA4,HSD17B12,JAG1,SRC,PREX1,PIP5K1A,CDK6,LIMCH1,FBLN2,VWF,LYPD3,DOCK1,ITGA9,BCR,BCAS3,GCNT2,ANGPT1,HAS2,ST6GAL1,SMOC2,PDPK1,CASK,ARHGAP6,ITGB8,TNN,USH2A,VCAM1,DMP1,PTPRZ1,OTOA,ITGAL,CRK,TBCD,SPOCK1,EDIL3,ADAMTS12,EFNA5,PRKCE,PIK3R1
GO:BP	ventricular septum development	GO:0003281	0.0129079	1.88914	79	1508	16	27543	MDM4,PROX1,XIRP2,LRP2,GJA5,LMO4,FZD1,CITED2,SLIT3,GATA4,ZFPM2,BMPR2,DCTN5,HEY2,PRDM1,HECTD1
GO:BP	regulation of secretion by cell	GO:1903530	0.0134356	1.87174	653	1508	64	27543	OPRK1,PLA2G4A,ACVR2A,GNAS,EDN3,ENSA,CD160,GJA5,MUP5,EPHA5,RABGEF1,CFTR,CADPS2,GRM8,RAB11FIP5,GRM7,SERGEF,STX1B,SYT8,VPS35,BCR,ADORA2A,CRY1,RAB21,HMGA2,TMED10,NRXN3,MCTP1,HTR1A,CPB2,EZR,PDPK1,ADCYAP1,INS1,CASK,HTR2C,TRPA1,INHBB,SYT13,KCNB1,PFN2,P2RY1,LYN,GIT2,CXCL12,ERC1,MCTP2,PRKCB,GJA1,RPH3AL,INHBA,NTRK2,MEF2C,PDE8B,HMGCR,PTGER4,ADCY5,EFNA5,PRKCE,GALR1,RFX3,CHD7,SELENOT,F2RL1
GO:BP	wound healing	GO:0042060	0.013657	1.86464	391	1508	44	27543	TMEFF2,VIL1,PLA2G4A,NFE2L2,TFPI,GNAS,SLC7A11,NOTCH2,TEC,MMRN1,VWF,PRCP,VKORC1,ANXA2,CD109,ITGA9,MAP3K5,TSPAN8,DSP,GATA4,CPB2,PPARA,SMOC2,CASK,RAP2B,SLC4A1,P2RY1,LYN,GRHL3,HPS4,SCNN1B,GJA1,CRK,MSX2,AP3B1,HMGCR,PTGER4,EXT1,SNAI2,PRKCE,PRKCA,CXCR4,SCNN1G,F2RL1
GO:BP	ameboidal-type cell migration	GO:0001667	0.0145718	1.83649	430	1508	47	27543	ERBB4,TNS1,VIL1,DUSP10,PROX1,NFE2L2,ITGA4,SRC,EDN3,YTHDF3,PIP5K1A,SEMA3D,PRCP,DOCK1,EDNRA,TPBG,SASH1,BCAS3,PLK2,ANGPT1,HAS2,FSTL1,ROBO1,T,SMOC2,PDPK1,DAAM2,MCC,AKT3,CAP1,BMPR2,PFN2,ZC3H12A,MET,CXCL12,ANLN,NUS1,GJA1,DCN,KITL,MEF2C,ARSB,SNAI2,PRKCE,FBN2,PRKCA,IQSEC1
GO:BP	positive regulation of cell differentiation	GO:0045597	0.0146374	1.83453	948	1508	85	27543	ARPC2,EPHA4,BRINP3,DUSP10,PROX1,IL2RA,ACVR2A,LRP2,NEUROD1,FRZB,RASGRP1,JAG1,PREX1,GNAS,EDN3,NOTCH2,KDM4C,CFTR,NTF3,SOX5,TENM4,DOCK1,MYLK3,MAP3K5,RAB21,SIX1,GCNT2,ZMIZ1,GATA4,SLITRK1,HAS2,PRKDC,ETV5,ROBO1,APP,TIAM2,CASK,PLXNB3,DCX,TRPC5,HTR2C,MME,BMPR2,XRCC5,SUCO,IFI204,TGM2,WWTR1,BMPR1B,LYN,PTPRD,PTCH2,AKIRIN1,ZC3H12A,PRDM16,PTPRZ1,CXCL12,GJA1,KITL,CRK,STAT3,ETV4,INHBA,MSX2,NTRK2,MEF2C,AP3B1,OTP,…
GO:BP	locomotory behavior	GO:0007626	0.0149583	1.82512	247	1508	32	27543	OPRK1,EPHA4,ASTN1,SPG11,MUP5,ADGRL3,CRBN,CLN8,VPS35,PCDH15,ADORA2A,GLRA1,SLC6A3,KLHL1,SLITRK6,ETV5,LSAMP,APP,RCAN2,HTR2C,ATP1A2,PPT1,CTNS,SEZ6L,CXCL12,NAGLU,MTA1,HEXB,ADCY5,PRKCE,CHD7,SEZ6L2
GO:BP	carbohydrate derivative metabolic process	GO:1901135	0.0158562	1.7998	993	1508	88	27543	PGAP1,TYW5,ATIC,EDEM3,MACROD2,ATP5E,PDE7A,PMVK,PGLYRP4,PGLYRP3,COL11A1,DPYD,UGT8A,PRKAG2,HS3ST1,G6PD2,CWH43,PAICS,TYW1,CHST12,EDEM1,PGLYRP1,INSR,DCTD,CSGALNACT1,LARGE1,EDNRA,RORA,GCNT3,LIPC,PDE7B,ENPP1,PAWR,ACACA,CMPK2,GALC,GCNT2,PDE4D,ITIH4,ANGPT1,HAS2,GTPBP1,PPARA,ADCY9,B3GNT5,ST6GAL1,APP,SLC4A1,ITGB8,BMPR2,ADSS,ST8SIA6,SLC35C1,CHST1,BMPR1B,ACACB,MVK,GXYLT2,ST8SIA1,HS3ST2,COG7,DCTPP1,AGA,NUS1,U…
GO:BP	regulation of protein phosphorylation	GO:0001932	0.0170752	1.76763	1140	1508	98	27543	PLCL1,ERBB4,EPHA4,CAB39,DUSP10,PROX1,ACVR2A,DNAJC10,RASGRP1,SRC,GNAS,EDN3,SH3GL2,AKAP9,FZD1,HGF,PRKAG2,LIMCH1,TEC,FZD10,RABGEF1,CLEC4N,NTF3,AKAP13,INSR,RBPMS,EDNRA,PDGFD,ANXA2,CCNB2,CD109,SASH1,TNFAIP3,MAP3K5,ENPP1,ADORA2A,FBXO7,HMGA2,TCL1,PDE4D,GATA4,ANGPT1,TWF1,PRKDC,ROBO1,APP,PDPK1,CBS,TWSG1,ADCYAP1,RIT2,FGF13,TRPC5,RAP2B,STRADB,BMPR2,CCNYL1,XRCC5,INHBB,SMYD3,WWTR1,PFN2,P2RY1,BMPR1B,LYN,BMP8B,…
GO:BP	positive regulation of phosphorus metabolic process	GO:0010562	0.0181114	1.74205	939	1508	84	27543	ERBB4,EPHA4,CAB39,PROX1,ACVR2A,RASGRP1,SRC,GNAS,EDN3,EEF1A2,LMO4,AKAP9,FZD1,HGF,PRKAG2,LIMCH1,TEC,EPHA5,FZD10,CLEC4N,NTF3,AKAP13,INSR,RBPMS,EDNRA,PDGFD,ANXA2,SASH1,MAP3K5,PAWR,HMGA2,TCL1,PDE4D,GATA4,ANGPT1,PPARA,ROBO1,APP,PDPK1,TWSG1,LHCGR,ADCYAP1,FGF13,TRPC5,HTR2C,RAP2B,STRADB,BMPR2,CCNYL1,XRCC5,INHBB,SMYD3,PPP1R16B,PFN2,P2RY1,BMPR1B,LYN,BMP8B,CAMTA1,CHEK2,GRK3,SPPL3,PTPRZ1,ADCYAP1R1,CTF2,KITL,E…
GO:BP	positive regulation of phosphate metabolic process	GO:0045937	0.0181114	1.74205	939	1508	84	27543	ERBB4,EPHA4,CAB39,PROX1,ACVR2A,RASGRP1,SRC,GNAS,EDN3,EEF1A2,LMO4,AKAP9,FZD1,HGF,PRKAG2,LIMCH1,TEC,EPHA5,FZD10,CLEC4N,NTF3,AKAP13,INSR,RBPMS,EDNRA,PDGFD,ANXA2,SASH1,MAP3K5,PAWR,HMGA2,TCL1,PDE4D,GATA4,ANGPT1,PPARA,ROBO1,APP,PDPK1,TWSG1,LHCGR,ADCYAP1,FGF13,TRPC5,HTR2C,RAP2B,STRADB,BMPR2,CCNYL1,XRCC5,INHBB,SMYD3,PPP1R16B,PFN2,P2RY1,BMPR1B,LYN,BMP8B,CAMTA1,CHEK2,GRK3,SPPL3,PTPRZ1,ADCYAP1R1,CTF2,KITL,E…
GO:BP	positive regulation of cell junction assembly	GO:1901890	0.0184484	1.73404	119	1508	20	27543	ADGRL3,LRRTM4,TPBG,FLRT2,SLITRK1,SLITRK6,UBE2V2,CBLN2,SYNDIG1,SLITRK3,PTPRD,GRID2,NTRK2,IL1RAP,EFNA5,NRXN1,BHLHB9,PIK3R1,EEF2K,LINGO2
GO:BP	positive regulation of locomotion	GO:0040017	0.0192521	1.71552	606	1508	60	27543	OPRK1,ERBB4,IGFBP5,CXCR2,ARPC2,VIL1,EPHA4,PROX1,NFE2L2,ITGA4,SRC,EDN3,CFAP69,SEMA3D,HGF,NTF3,DOCK1,INSR,EDNRA,VPS35,PDGFD,TPBG,SASH1,PAWR,BCAS3,GCNT2,PDE4D,PLK2,ANGPT1,HAS2,APP,SMOC2,PDPK1,AKT3,BMPR2,LAMC2,SUCNR1,LYN,AKIRIN1,ZC3H12A,SSH1,MET,PTPRZ1,CXCL12,NUS1,KITL,CRK,STAT3,DOCK4,PTGER4,SEMA5A,SNAI2,PRKCE,PRKCA,PIK3R1,IQSEC1,MGAT5,CXCR4,PYCARD,F2RL1
GO:BP	ossification	GO:0001503	0.0193036	1.71436	409	1508	45	27543	SATB2,IGFBP5,ACVR2A,JAG1,GNAS,FAT4,CTSK,COL11A1,MMP16,CDK6,FZD1,EIF2AK3,CSGALNACT1,ENPP1,ATP2B1,ADGRV1,HIRA,CBS,TWSG1,CHRDL1,BMPR2,TNN,SUCO,IFI204,MIR205,SLC24A3,WWTR1,IGSF10,BMPR1B,GLIS1,BMP8B,DMP1,GJA1,MSX2,MEF2C,PTGER4,ADAMTS12,RSPO2,EXT1,SNAI2,CCDC154,BAMBI,FBN2,TMEM64,COL2A1
GO:BP	enzyme-linked receptor protein signaling pathway	GO:0007167	0.0201498	1.69573	956	1508	85	27543	ERBB4,IGFBP5,VIL1,EPHA4,PIP4K2A,ACVR2A,LRP2,SRC,DOK5,FAT4,TIPARP,RNF115,NOTCH2,MUP5,FZD1,HGF,CLNK,EPHA5,RABGEF1,NTF3,INSR,RBPMS,ZFP423,PDGFD,CD109,CITED2,ENPP1,AKAP7,FRK,WASF1,BCR,SIPA1L1,FLRT2,GCNT2,ZMIZ1,GATA4,ANGPT1,PPARA,FSTL1,ROBO1,T,SMOC2,RGMB,LNPEP,PDPK1,TWSG1,SH3TC2,CHRDL1,ITGB8,BMPR2,INHBB,GREM2,WWTR1,BMPR1B,LYN,BMP8B,PRDM16,MET,C2CD5,PRKCB,PTPRE,NUS1,DCN,ERBB3,GRB10,SPTBN1,CRK,STAT3,INH…
GO:BP	regulation of neurotransmitter secretion	GO:0046928	0.0210122	1.67753	120	1508	20	27543	EDN3,GRM8,GRM7,STX1B,ADORA2A,NRXN3,MCTP1,HTR1A,CASK,HTR2C,PFN2,P2RY1,GIT2,ERC1,MCTP2,PRKCB,NTRK2,MEF2C,PTGER4,PRKCE
GO:BP	second-messenger-mediated signaling	GO:0019932	0.0215372	1.66681	311	1508	37	27543	CXCR2,CXCR1,NEUROD1,GNAS,EDN3,PDE7A,MYOZ2,ANK2,EPHA5,EXOC4,ALMS1,LMCD1,PDE7B,PDE4D,APP,PDPK1,CBS,RCAN2,LHCGR,ADCYAP1,RIT2,HTR2C,CAP1,AGTR1B,VCAM1,CAMTA1,SPPL3,ADCYAP1R1,ITPR2,ITGAL,ERBB3,NTRK2,PTGER4,NCALD,EFHB,CXCR4,CHP2
GO:BP	cell surface receptor signaling pathway involved in cell-cell signaling	GO:1905114	0.0221686	1.65426	555	1508	56	27543	FRZB,SRC,BCL9,FZD1,CDK14,FZD10,MDFIC,VGLL4,STX1B,EDNRA,VPS35,ZFP423,SALL1,TLE3,TPBG,TNFAIP3,BICC1,ADORA2A,LGR5,HMGA2,GLRA1,SHISA6,DAAM1,NKD2,DEPDC1B,CSNK1E,IGSF11,APP,DAAM2,CELF4,MCC,MBD2,NDP,CCNYL1,TNN,RGS4,MARK1,WWTR1,TRABD2B,GRHL3,SSH1,GRID2,KLF15,EPM2A,GRIK2,GRB10,MEF2C,ZBED3,RSPO2,EXT1,SNAI2,NRXN1,BAMBI,CSNK1G3,TMEM64,CACNB3
GO:BP	neurotransmitter-gated ion channel clustering	GO:0072578	0.0223403	1.65091	21	1508	8	27543	SLC7A11,LRRTM4,SHISA6,HTR1A,CHRDL1,SLITRK3,SSH1,NRXN1
GO:BP	regulation of hormone levels	GO:0010817	0.0223889	1.64997	582	1508	58	27543	OPRK1,ACVR2A,LRP2,NEUROD1,HSD17B12,GNAS,EDN3,TIPARP,UBE2Q1,ARNT,CTSK,ENSA,HSD3B1,ATP1A1,MUP5,EPHA5,CFTR,RAB11FIP5,SNX19,CRY1,HMGA2,RDH16,TPO,DHRS7,HTR1A,LHCGR,ADCYAP1,CASK,SLC16A2,HTR2C,TRPA1,INHBB,PCSK2,KCNB1,P2RY1,HSD3B5,BMPR1B,LYN,SCNN1B,SLC7A5,GJA1,RPH3AL,DIO3,PTPRN2,INHBA,PDE8B,HMGCR,GCNT4,GHR,PTGER4,ADCY5,EFNA5,PRKCE,GALR1,RFX3,CHD7,SELENOT,STAT5B
GO:BP	multicellular organism growth	GO:0035264	0.0231114	1.63617	195	1508	27	27543	VIL1,GNAS,NOTCH2,SGIP1,ALMS1,PCDH15,HMGA2,SLC6A3,PDE4D,RARB,SLITRK1,SLITRK6,APP,EZR,MFSD2A,WWTR1,SCNN1B,HELT,CTC1,STAT3,DIO3,GHR,EXT1,SOS1,CHD7,RBBP6,STAT5B
GO:BP	positive regulation of response to stimulus	GO:0048584	0.0233806	1.63114	2264	1508	171	27543	OPRK1,EYA1,ERBB4,IGFBP5,CXCR2,EPHA4,PLA2G4A,PROX1,ACVR2A,LRP2,NFE2L2,RASGRP1,JAG1,SRC,DOK5,GNAS,EDN3,FCGR1,CD160,NOTCH2,ALPK1,MUP5,EIF2B3,KHDRBS1,HGF,CLNK,TEC,SLC15A4,FZD10,RABGEF1,AUTS2,EXOC4,ZC3HAV1,LMCD1,CLEC4N,VWF,NTF3,AKAP13,STX1B,INSR,RBPMS,NR3C2,EDNRA,VPS35,ZFP423,SALL1,PDGFD,CADM1,TPBG,SASH1,CITED2,TNFAIP3,MAP3K5,EYA4,STX7,ARG1,WASF1,ADORA2A,POLR3B,PAWR,LGR5,HMGA2,PRL7B1,GCNT2,ADGRV1,DEPD…
GO:BP	muscle tissue development	GO:0060537	0.0238881	1.62182	464	1508	49	27543	EYA1,ERBB4,IGFBP5,DNER,PROX1,XIRP2,LRP2,SPG11,TIPARP,GJA5,BCL9,COL11A1,MYOZ2,VGLL4,AKAP13,TENM4,SORBS2,EDNRA,MYLK3,PLAGL1,CITED2,CNTNAP1,SIX1,DSP,RARB,GATA4,ZFPM2,ANGPT1,COL14A1,PPARA,RBFOX1,T,PGM5,SPEG,TNN,RGS4,MBNL1,AKIRIN1,PAX7,MYO18B,TCF21,HEY2,GJA1,ERBB3,MEF2C,HMGCR,CHD7,ZFP689,CCNB1
GO:BP	positive regulation of cell population proliferation	GO:0008284	0.0247312	1.60675	1048	1508	91	27543	EYA1,ERBB4,IGFBP5,CXCR2,EPHA4,MDM4,PLA2G4A,PROX1,IL2RA,LRP2,ITGA4,GNAS,CTSZ,EDN3,CYP7B1,CHTOP,NOTCH2,KDM4C,SSBP3,PRAMEL5,CDK6,SLC7A1,NTF3,SETD1A,INSR,EDNRA,ZFP423,PDGFD,ANXA2,TNFAIP3,MAP3K5,ARG1,HMGA2,SIX1,TCL1,PRL7B1,GCNT2,PDE4D,ZMIZ1,GATA4,ZFPM2,HAS2,PRKDC,ETV5,ST6GAL1,T,PDPK1,ADCYAP1,PLXNB3,TRPC5,AKT3,SLC4A1,BMPR2,LAMC2,MIR205,PPP1R16B,AGTR1B,WWTR1,VCAM1,LYN,PAX7,PTPRZ1,CXCL12,ST8SIA1,ITGAL,CT…
GO:BP	regulation of membrane potential	GO:0042391	0.0253152	1.59662	465	1508	49	27543	RGS7,KCNH7,SRC,GJA5,ATP1A1,ANK2,AKAP9,DPP6,GABRA2,CFTR,TMEM135,STX1B,AKAP7,ANK3,ADORA2A,PAWR,GLRA1,GRIA1,CNTNAP1,TCL1,DSP,IGSF11,APP,ADCYAP1,CELF4,FGF13,TRPC5,GABRP,CTNS,TRPA1,RGS4,KCNB1,GRIK3,SSH1,GRID2,GRIK2,GJA1,CTNNA3,DCN,SCN4A,NTRK2,MEF2C,TMEM161B,GRID1,PRKCE,NRXN1,GNA14,ABCB5,CACNB3
GO:BP	regulation of anatomical structure size	GO:0090066	0.0279081	1.55427	546	1508	55	27543	CPS1,ARPC2,VIL1,EDN3,GJA5,SEMA3D,CAPZA2,CFTR,CLN8,EDNRA,ARHGAP18,ADORA2A,ATP2B1,RAB21,SLC12A7,HTR1A,TWF1,EZR,CBS,DAAM2,ADCYAP1,WDR36,PRR16,ADD3,FGF13,DCX,TRPC5,HTR2C,ATP1A2,AKT3,BMPR2,MIR205,TTL,DSTN,ARHGAP40,RAB22A,AGTR1B,PFN2,P2RY1,SSH1,CXCL12,SCNN1B,GJA1,SPTBN1,DOCK4,HMGCR,SEMA5A,EXT1,VPREB2,EFNA5,PRKCE,SPTA1,IL7R,PYCARD,F2RL1
GO:BP	cardiac ventricle development	GO:0003231	0.0286651	1.54265	143	1508	22	27543	MDM4,PROX1,XIRP2,LRP2,JAG1,GJA5,COL11A1,LMO4,FZD1,EDNRA,CITED2,SLIT3,DSP,GATA4,ZFPM2,BMPR2,DCTN5,HEY2,PRDM1,HECTD1,MEF2C,CHD7
GO:BP	response to hormone	GO:0009725	0.0291002	1.5361	951	1508	84	27543	OPRK1,CPS1,IGFBP5,CAB39,PIP4K2A,LRP2,NFE2L2,TFPI,SRC,GNAS,CYP7B1,HSD3B1,ATP1A1,AGL,MUP5,EIF2B3,EPHA5,AKAP13,PRCP,INSR,EDNRA,CNOT1,CITED2,ENPP1,ARG1,CRY1,ATP2B1,LGR5,HMGA2,SLIT3,ACACA,BCAS3,SERPINA3I,RARB,ZMIZ1,GATA4,PPARA,PRKDC,ARID1B,PDPK1,LHCGR,ADCYAP1,INS1,ATP1A2,AKT3,BCHE,MSI1,SERPINA3C,INHBB,SMYD3,AGTR1B,HSD3B5,LYN,KLF15,CXCL12,C2CD5,SCNN1B,PRKCB,PTPRE,GPR83,TCF21,GJA1,GRB10,CRK,STAT3,BRCA1,…
GO:BP	regulation of actin cytoskeleton organization	GO:0032956	0.0294855	1.53039	365	1508	41	27543	TMEFF2,ARPC2,VIL1,PROX1,NOTCH2,LIMCH1,EPHA5,FZD10,CAPZA2,ALMS1,NTF3,AKAP13,MYLK3,CGNL1,ARHGAP18,WASF1,BCAS3,TWF1,DAAM2,ADD3,ARHGAP6,RGS4,DSTN,ARHGAP40,PFN2,GRHL3,SSH1,MET,ARHGAP17,SPTBN1,CRK,TAOK1,MEF2C,IQGAP2,PTGER4,EFNA5,PRKCE,SPTA1,PIK3R1,PYCARD,F2RL1
GO:BP	development of primary sexual characteristics	GO:0045137	0.0295862	1.52891	279	1508	34	27543	PLA2G4A,ACVR2A,LRP2,SRC,TIPARP,CFTR,NOBOX,INSR,SALL1,CITED2,HMGA2,SLIT3,GATA4,DACH1,ZFPM2,ANGPT1,LHCGR,ADCYAP1,GPR149,INHBB,BMPR1B,LFNG,ADCYAP1R1,TCF21,GJA1,KITL,IMMP2L,ADAM6A,INHBA,LHFPL2,PTGER4,SAFB2,ERMP1,STAT5B
GO:BP	artery morphogenesis	GO:0048844	0.0297741	1.52616	75	1508	15	27543	EYA1,PROX1,LRP2,JAG1,GJA5,EDNRA,CITED2,SIX1,ZMIZ1,AKT3,BMPR2,HEY2,PRDM1,PTGER4,CHD7
GO:BP	inner ear development	GO:0048839	0.0298866	1.52452	209	1508	28	27543	EYA1,EPHA4,PROX1,NEUROD1,FRZB,JAG1,FAT4,COL11A1,ALMS1,LRIG1,EYA4,PCDH15,BCR,LGR5,SIX1,ADGRV1,SLITRK6,IFI204,USH2A,FREM2,GRHL3,HEY2,NAGLU,MYCN,JAG2,ALG10B,CHD7,COL2A1
GO:BP	positive regulation of molecular function	GO:0044093	0.0328543	1.48341	1533	1508	123	27543	ST18,PLCL1,ERBB4,DNAJB2,EPHA4,CAB39,RGS7,PROX1,NEUROD1,DNAJC10,RASGRP1,SRC,PREX1,GNAS,EDN3,EEF1A2,CHTOP,PIP5K1A,ANK2,LMO4,AKAP9,FZD1,PRKAG2,EPHA5,PARM1,FZD10,CFTR,ZC3HAV1,NTF3,AKAP13,INSR,WRN,EDNRA,CASP12,PDGFD,ANXA2,TBC1D2B,SASH1,PERP,MAP3K5,AKAP7,ANK3,BCR,PAWR,LGR5,HMGA2,BCAS3,EGLN3,RALGAPA1,SIPA1L1,TCL1,RAPGEF5,PLK2,ANGPT1,TRAPPC9,NFAM1,ROBO1,APP,TIAM2,PDPK1,LHCGR,ADCYAP1,MBD2,FGF13,ARHGAP6,AR…
GO:BP	cardiac septum morphogenesis	GO:0060411	0.035234	1.45304	76	1508	15	27543	PROX1,LRP2,JAG1,GJA5,NOTCH2,FZD1,CITED2,SLIT3,GATA4,ZFPM2,BMPR2,HEY2,DNAH11,MSX2,CHD7
GO:BP	regulation of cellular localization	GO:0060341	0.0354881	1.44992	799	1508	73	27543	PGAP1,ERBB4,ARPC2,VIL1,DPP10,SEC16B,SRC,SLC7A11,OTUD7B,MUP5,ASTN2,KHDRBS1,DPP6,EPHA5,RABGEF1,MDFIC,CFTR,RAB11FIP5,EDEM1,SORBS2,EDNRA,INPP4B,VPS35,ANXA2,STX7,ANK3,RAB21,SHISA6,BCAS3,TRAPPC12,NKD2,SIAH3,PCDH17,ANGPT1,APP,EZR,PDPK1,CRIPT,LHCGR,SH3TC2,TENM1,CABP1,TRPA1,CNST,TTL,SCP2D1,KCNB1,WWTR1,LYN,ZC3H12A,SSH1,ADCYAP1R1,C2CD5,EPM2A,NUS1,SPTBN1,BECN1,BRCA1,DNAJC27,HECTD1,VRK1,DYNC1H1,PDE8B,HMGCR,AD…
GO:BP	anatomical structure homeostasis	GO:0060249	0.0356185	1.44832	318	1508	37	27543	ERBB4,CRB1,PLA2G4A,NEUROD1,SRC,GNAS,CTSK,SH3GL2,NCDN,TMEM175,CLN8,LARGE1,PCDH15,ATP2B1,BBS10,ACACA,GCNT2,MAK,ADGRV1,ANGPT1,COL14A1,WDR36,AKT3,MFSD2A,USH2A,WWTR1,P2RY1,MTF1,POC1B,TAOK1,PTGER4,EXT1,CCDC154,TMEM64,COL2A1,FH1,OCLN
GO:BP	response to oxygen-containing compound	GO:1901700	0.0357616	1.44658	2014	1508	154	27543	OPRK1,CRYGF,CPS1,IGFBP5,ARPC2,EPHA4,BRINP3,EDEM3,OLFR16,RGS7,DUSP10,PIP4K2A,NFE2L2,ITGA4,NEUROD1,JAG1,SRC,GNAS,PMVK,SETDB1,HSD3B1,MUP5,EIF2B3,AKAP9,HGF,HTR5A,HADHB,ADGRL3,EPHA5,PSPH,CFTR,RAB11FIP5,EDEM1,INSR,SORBS2,EDNRA,VPS35,GOT2,PDGFD,RORA,SASH1,TNFAIP3,MAP3K5,ENPP1,ARG1,AKAP7,BCR,GGT1,CRY1,FBXO7,ATP2B1,PAWR,SLIT3,GLRA1,ACACA,CMPK2,SIX1,SERPINA3I,SLC6A3,HTR1A,PDE4D,GATA4,CPB2,PPARA,SLC38A2,TRA…
GO:BP	cellular protein catabolic process	GO:0044257	0.0365205	1.43746	828	1508	75	27543	HECW2,USP37,DNAJB2,EPHA4,EDEM3,DTL,NFE2L2,DNAJC10,CTSZ,BBS7,CTSK,OTUD7B,RNF115,WWP1,AGBL4,PSMB2,ANKIB1,UBE3C,RMND5A,CRBN,EDEM1,VGLL4,CLN8,VPS35,N4BP1,ANXA2,SPSB4,TNFAIP3,UBE2D1,FBXO7,RNF144A,FBXO33,SEL1L,HECW1,NKD2,RNF180,PLK2,FHIT,SIAH3,CSNK1E,UBE2V2,PSMD2,EZR,FBXL17,SOCS6,USP11,PPT1,KLHL20,WWTR1,RNF13,UBR4,CHEK2,KCTD10,UBE3B,ANAPC7,USP12,TMEM106B,RYBP,USP31,FBXL19,EPM2A,RNF217,USP32,PSMC5,HECTD…
GO:BP	proteolysis	GO:0006508	0.0388815	1.41026	1877	1508	145	27543	ST18,HECW2,CPS1,VIL1,USP37,DNAJB2,EPHA4,DPP10,EDEM3,DTL,OTUD1,NFE2L2,DNAJC10,TFPI,SRC,CTSZ,BBS7,CTSK,OTUD7B,RNF115,MMP16,WWP1,AGBL4,PSMB2,ANKIB1,HGF,DPP6,UBE3C,MMP17,RMND5A,CRBN,EDEM1,ADAMTS17,AGBL1,PRCP,PRSS53,VPS35,N4BP1,CASP12,ANXA2,CD109,SPSB4,PERP,TNFAIP3,MAP3K5,UBE2D1,ADORA2A,GGT1,FBXO7,PAWR,NPEPPS,RNF144A,EGLN3,FBXO33,TMED10,SEL1L,SERPINA3I,SERPINA3K,HECW1,NKD2,CAST,ADGRV1,RNF180,PLK2,FHIT…
GO:BP	positive regulation of cell communication	GO:0010647	0.0415384	1.38155	1895	1508	146	27543	OPRK1,ERBB4,IGFBP5,EPHA4,PROX1,ACVR2A,LRP2,RASGRP1,JAG1,SRC,DOK5,GNAS,EDN3,GJA5,NOTCH2,ALPK1,MUP5,SLC24A2,HGF,SLC15A4,FZD10,AUTS2,CFTR,EXOC4,ZC3HAV1,LMCD1,CLEC4N,VWF,NTF3,AKAP13,STX1B,INSR,RBPMS,NR3C2,EDNRA,VPS35,ZFP423,SALL1,PDGFD,TPBG,SASH1,CITED2,TNFAIP3,MAP3K5,LAMA2,WASF1,ANK3,ADORA2A,PAWR,LGR5,GRIA1,PRL7B1,GCNT2,ADGRV1,DEPDC1B,PLK2,ZMIZ1,GATA4,ANGPT1,CSNK1E,NFAM1,IGSF11,ROBO1,MIRLET7C-1,APP,…
GO:BP	cellular response to oxygen-containing compound	GO:1901701	0.0430086	1.36644	1466	1508	118	27543	OPRK1,CRYGF,CPS1,IGFBP5,ARPC2,EPHA4,BRINP3,OLFR16,PIP4K2A,NFE2L2,ITGA4,NEUROD1,SRC,GNAS,MUP5,AKAP9,HGF,HTR5A,HADHB,EPHA5,CFTR,RAB11FIP5,INSR,SORBS2,EDNRA,VPS35,PDGFD,RORA,SASH1,TNFAIP3,MAP3K5,ENPP1,ARG1,AKAP7,BCR,FBXO7,ATP2B1,PAWR,GLRA1,ACACA,CMPK2,SIX1,HTR1A,PDE4D,GATA4,CPB2,SLC38A2,TRAP1,PRKDC,HTR1F,APP,ARID1B,EZR,T,PDPK1,LHCGR,HTR2C,AKT3,TRPA1,XRCC5,INHBB,RGS4,SMYD3,MIR205,TGM2,KCNB1,AGTR1B,VC…
GO:BP	positive regulation of protein serine/threonine kinase activity	GO:0071902	0.0444243	1.35238	225	1508	29	27543	EPHA4,CAB39,PROX1,RASGRP1,SRC,EDN3,FZD10,NTF3,AKAP13,INSR,PDGFD,SASH1,MAP3K5,HMGA2,TCL1,ROBO1,APP,BMPR2,CCNYL1,BMPR1B,KITL,TAOK1,STRADA,MEF2C,GHR,NRXN1,ERN2,ACSL1,CCNB1
GO:BP	positive regulation of cell projection organization	GO:0031346	0.0454017	1.34293	423	1508	45	27543	ARPC2,VIL1,EPHA4,NFE2L2,ZFP804A,SRC,PLPPR5,FZD1,HGF,AUTS2,RAB21,GRIP1,BCAS3,SLITRK1,TWF1,UBE2V2,ROBO1,TIAM2,ADCYAP1,RIT2,DPYSL3,DCC,CASK,PLXNB3,DCX,TRPC5,BMPR2,TNN,STMN2,LYN,PTPRD,AKIRIN1,TMEM106B,PTPRZ1,CXCL12,ANLN,NTRK2,ARSB,SEMA5A,EFNA5,CEP120,BHLHB9,PIK3R1,EEF2K,F2RL1
GO:BP	macromolecule catabolic process	GO:0009057	0.0455116	1.34188	1347	1508	110	27543	HECW2,BOLL,USP37,DNAJB2,EPHA4,MDM4,EDEM3,ANGEL2,DTL,NFE2L2,DNAJC10,CTSZ,YTHDF3,BBS7,TIPARP,PGLYRP4,PGLYRP3,CTSK,OTUD7B,RNF115,SEC22B,AGL,WWP1,AGBL4,PSMB2,ANKIB1,UBE3C,ZC3HAV1,RMND5A,CRBN,EDEM1,VGLL4,PGLYRP1,ABHD13,CLN8,VPS35,N4BP1,CNOT1,ANXA2,SPSB4,TNFAIP3,UBE2D1,FBXO7,EIF4ENIF1,RNF144A,FBXO33,SEL1L,HECW1,NKD2,CAST,TTC37,RNF180,PLK2,FHIT,SIAH3,CSNK1E,GTPBP1,UBE2V2,PSMD2,MIRLET7C-1,APP,EZR,LNPEP,F…
GO:BP	telencephalon development	GO:0021537	0.0464725	1.3328	285	1508	34	27543	ERBB4,ATIC,PROX1,NEUROD1,BTBD3,FAT4,SLC7A11,HSD3B1,HTR5A,EPHA5,SALL1,KIRREL3,ULK4,RARB,ZMIZ1,DNAH5,TRAPPC9,SLC38A2,ROBO1,SALL3,FGF13,DCX,ATP1A2,MFSD2A,HSD3B5,CXCL12,CRK,INHBA,NTRK2,MIR9-2,EXT1,CEP120,CHD7,CXCR4
GO:BP	homeostasis of number of cells	GO:0048872	0.0471534	1.32649	347	1508	39	27543	CXCR2,IL2RA,ACVR2A,SLC7A11,UBAP2L,CDK6,SLC15A4,CADPS2,SETD1A,CCNB2,CITED2,TNFAIP3,L3MBTL3,BCR,COL14A1,PRKDC,FSTL1,PKNOX1,AKT3,SLC4A1,LYN,PTBP3,SCNN1B,TRAF3IP2,KITL,STAT3,NCAPG2,INHBA,MEF2C,AP3B1,GCNT4,EXT1,VPREB2,SOS1,SPTA1,IL7R,STAT5B,RCOR1,FH1
GO:BP	reproductive system development	GO:0061458	0.0475271	1.32306	516	1508	52	27543	PLA2G4A,ACVR2A,LRP2,SRC,CYP7B1,TIPARP,UBE2Q1,ARNT,NOTCH2,GJB5,CFTR,NOBOX,PLEKHA5,INSR,SALL1,CITED2,RTCB,HMGA2,SLIT3,GATA4,ZFPM2,ANGPT1,LHCGR,ADCYAP1,NSDHL,NRK,GPR149,MME,NDP,BMPR2,INHBB,VCAM1,BMPR1B,LFNG,TCF21,HEY2,PRDM1,GJA1,KITL,IMMP2L,HECTD1,ADAM6A,INHBA,CTS7,HSD17B3,PTGER4,ZFAT,SAFB2,FBN2,ERMP1,CHD7,STAT5B
GO:BP	cation transmembrane transport	GO:0098655	0.0481674	1.31725	892	1508	79	27543	OPRK1,HECW2,SLC41A1,RGS7,KCNT1,KCNJ3,KCNH7,EDN3,KCNN3,ANXA9,ATP1A1,ANK2,CNGB3,SLC24A2,AKAP9,DPP6,KCNIP4,TMEM175,COX6A1,SLC15A4,SLC7A1,CFTR,SLC41A3,CRBN,GRM7,CACNA2D4,SLC1A5,EDNRA,ANXA2,ARG1,AKAP7,ANK3,ATP2B1,PAWR,SHISA6,HECW1,SLC6A3,SLC6A18,SLC12A7,PDE4D,CACNA2D3,KCNV1,SHISA9,APP,KCNJ6,PDPK1,KCNH8,LHCGR,TRPM3,FGF13,TRPC5,HTR2C,ATP1A2,CABP1,CTNS,TRPA1,CACNA1E,RGS4,SLC24A3,KCNB1,LYN,ADCYAP1R1,ITPR2…
GO:BP	epithelial tube morphogenesis	GO:0060562	0.0483887	1.31526	360	1508	40	27543	EYA1,CXCR2,EPHA4,LRP2,SRC,CTSZ,FAT4,NOTCH2,LMO4,FZD1,EDNRA,MTHFD1L,CITED2,IPMK,LGR5,HMGA2,SIX1,IRX1,GATA4,ANGPT1,ETV5,T,KIF26B,AGTR1B,GRHL3,MET,CXCL12,TCF21,GJA1,ETV4,MYCN,HECTD1,MSX2,MEF2C,ADAMTS12,RSPO2,EXT1,ZIC3,ENAH,CXCR4
GO:CC	cytoplasm	GO:0005737	3.53473e-28	27.4516	11416	1506	845	27317	OPRK1,PCMTD1,SNTG1,EYA1,JPH1,OSGEPL1,STK17B,HECW2,PGAP1,MOB4,BOLL,PLCL1,CPS1,ERBB4,ATIC,CXCR2,ARPC2,VIL1,USP37,DNAJB2,EPHA4,DNER,CAB39,CRB1,BRINP3,PLA2G4A,HMCN1,EDEM3,SEC16B,ASTN1,RGS7,CEP170,DUSP10,PROX1,RPS6KC1,ANGEL2,DTL,ANKRD16,MALRD1,PIP4K2A,MSRB2,ETL4,MYO3A,ACVR2A,XIRP2,CERS6,LRP2,MTX2,NFE2L2,TTC30A1,OSBPL6,UBE2E3,CERKL,NEUROD1,PPP1R1C,DNAJC10,FRZB,ZFP804A,HSD17B12,RASGRP1,SPG11,BTBD3,SRC,P…
GO:CC	cell junction	GO:0030054	7.01904e-21	20.1537	2117	1506	228	27317	OPRK1,MOB4,ERBB4,TNS1,ARPC2,EPHA4,CRB1,HMCN1,OLFR16,RGS7,RPS6KC1,KCNJ3,XIRP2,ZFP804A,SPG11,JAG1,SRC,EEF1A2,KCNN3,CGN,ANXA9,VPS45,GJA5,SEC22B,CD2,ATP1A1,OLFM3,ANK2,SH3GL2,SGIP1,NCDN,GJB5,AKAP9,HTR5A,GABRA2,ADGRL3,EPHA5,TCHP,RIMBP2,CADPS2,GRM8,EXOC4,LRRTM4,MAGI1,PDZRN3,GRM7,NTF3,PLEKHA5,PPFIBP1,STX1B,SYT8,INSR,CLN8,SORBS2,VPS35,CNTNAP4,CNTN5,NTM,KIRREL3,CADM1,TPBG,SYNE1,PERP,AHI1,AKAP7,LAMA2,WASF1,…
GO:CC	synapse	GO:0045202	4.636e-19	18.3339	1499	1506	175	27317	OPRK1,MOB4,ERBB4,ARPC2,EPHA4,OLFR16,RGS7,RPS6KC1,KCNJ3,ZFP804A,SPG11,SRC,EEF1A2,KCNN3,ANXA9,VPS45,SEC22B,ATP1A1,OLFM3,ANK2,SH3GL2,SGIP1,NCDN,AKAP9,HTR5A,GABRA2,ADGRL3,RIMBP2,CADPS2,GRM8,EXOC4,LRRTM4,PDZRN3,GRM7,NTF3,PLEKHA5,PPFIBP1,STX1B,SYT8,INSR,CLN8,SORBS2,VPS35,CNTNAP4,CNTN5,NTM,KIRREL3,CADM1,TPBG,SYNE1,AKAP7,LAMA2,WASF1,ANK3,PCDH15,BCR,ADORA2A,SYN3,ATP2B1,RAB21,GRIP1,PPM1H,GLRA1,GRIA1,SHISA6…
GO:CC	cell projection	GO:0042995	2.57034e-17	16.59	2533	1506	248	27317	OPRK1,SNTG1,MOB4,ERBB4,ARPC2,VIL1,EPHA4,DNER,CRB1,BRINP3,OLFR16,RGS7,CEP170,PIP4K2A,MYO3A,LRP2,TTC30A1,ITGA4,CERKL,ZFP804A,SPG11,SRC,GNAS,CTSZ,BBS7,SLC7A11,KCNN3,UBE2Q1,PIP5K1A,GJA5,NOTCH2,SPAG17,ATP1A1,PTBP2,ANK2,ALPK1,CNGB3,RNF38,SH3GL2,AGBL4,NCDN,CDK6,AKAP9,FZD1,CFAP69,HTR5A,CRMP1,KCNIP4,GABRA2,ADGRL3,EPHA5,TCHP,PSPH,AUTS2,CFTR,GRM8,EXOC4,ALMS1,MAGI1,CNTN3,GRM7,NTF3,SLC28A1,TENM4,STX1B,GLRX3,S…
GO:CC	plasma membrane bounded cell projection	GO:0120025	2.70848e-17	16.5673	2437	1506	241	27317	OPRK1,SNTG1,MOB4,ERBB4,ARPC2,VIL1,EPHA4,DNER,CRB1,BRINP3,OLFR16,RGS7,CEP170,PIP4K2A,MYO3A,LRP2,TTC30A1,ITGA4,CERKL,ZFP804A,SPG11,SRC,GNAS,CTSZ,BBS7,SLC7A11,KCNN3,UBE2Q1,PIP5K1A,NOTCH2,SPAG17,ATP1A1,PTBP2,ANK2,ALPK1,CNGB3,RNF38,SH3GL2,AGBL4,NCDN,CDK6,AKAP9,FZD1,CFAP69,HTR5A,CRMP1,KCNIP4,GABRA2,ADGRL3,EPHA5,TCHP,PSPH,AUTS2,CFTR,GRM8,EXOC4,ALMS1,CNTN3,GRM7,NTF3,SLC28A1,TENM4,STX1B,GLRX3,SYT8,INSR,AB…
GO:CC	neuron projection	GO:0043005	1.21012e-15	14.9172	1578	1506	172	27317	OPRK1,MOB4,ERBB4,ARPC2,EPHA4,DNER,CRB1,BRINP3,OLFR16,RGS7,PIP4K2A,LRP2,ITGA4,CERKL,ZFP804A,SPG11,SRC,GNAS,CTSZ,BBS7,KCNN3,ATP1A1,PTBP2,ANK2,CNGB3,SH3GL2,AGBL4,NCDN,AKAP9,FZD1,HTR5A,CRMP1,KCNIP4,GABRA2,ADGRL3,EPHA5,PSPH,AUTS2,CFTR,GRM8,EXOC4,CNTN3,GRM7,NTF3,TENM4,STX1B,GLRX3,SYT8,INSR,ABHD13,WRN,SORBS2,VPS35,CNTNAP4,CNTN5,FAT3,NTM,KIRREL3,CADM1,TPBG,ARG1,WASF1,ANK3,ZWINT,PCDH15,BCR,ADORA2A,FBXO7,A…
GO:CC	membrane	GO:0016020	7.00192e-15	14.1548	10261	1506	722	27317	OPRK1,PCMTD1,SNTG1,JPH1,OGFRL1,4931408C20RIK,TMEFF2,STK17B,PGAP1,MOB4,RFTN2,BOLL,PLCL1,CPS1,ERBB4,ATIC,CXCR2,CXCR1,ARPC2,VIL1,DNAJB2,SLC4A3,EPHA4,DNER,CAB39,DPP10,SLC41A1,CRB1,BRINP3,PLA2G4A,HMCN1,EDEM3,SEC16B,ASTN1,VSIG8,OLFR16,RGS7,KCTD3,RPS6KC1,DTL,IL2RA,MALRD1,PIP4K2A,GPR158,KCNT1,OLFR342,ACVR2A,KCNJ3,KCNH7,CERS6,LRP2,MTX2,NFE2L2,OSBPL6,ITGA4,NUP35,ZFP804A,TFPI,HSD17B12,D430041D05RIK,RASGRP1,…
GO:CC	somatodendritic compartment	GO:0036477	3.89761e-13	12.4092	1081	1506	126	27317	OPRK1,MOB4,ERBB4,ARPC2,EPHA4,DNER,BRINP3,ASTN1,OLFR16,RGS7,LRP2,ITGA4,PDE1A,ZFP804A,SPG11,GNAS,EEF1A2,KCNN3,PTBP2,ASTN2,SH3GL2,NCDN,AKAP9,DPP6,HTR5A,CRMP1,KCNIP4,GABRA2,EPHA5,CFTR,GRM8,EXOC4,GRM7,NTF3,GLRX3,INSR,ABHD13,SORBS2,VPS35,GOT2,CNTNAP4,FAT3,KIRREL3,CADM1,TPBG,ARG1,WASF1,ANK3,ZWINT,BCR,ADORA2A,ATP2B1,PAWR,GRIP1,KIF5A,GLRA1,GRIA1,SHISA6,RBFOX3,SIPA1L1,SLC6A3,HTR1A,PLK2,ERC2,KLHL1,CSNK1E,SL…
GO:CC	cell periphery	GO:0071944	1.77946e-12	11.7497	6988	1506	517	27317	OPRK1,SNTG1,JPH1,TMEFF2,STK17B,RFTN2,BOLL,PLCL1,ERBB4,ATIC,CXCR2,CXCR1,ARPC2,VIL1,SLC4A3,EPHA4,DNER,DPP10,SLC41A1,CRB1,HMCN1,ASTN1,OLFR16,RGS7,KCTD3,LAMB3,IL2RA,PIP4K2A,GPR158,KCNT1,OLFR342,ACVR2A,KCNJ3,KCNH7,LRP2,NFE2L2,OSBPL6,ITGA4,NUP35,ZFP804A,TFPI,HSD17B12,RASGRP1,SPG11,JAG1,SRC,PREX1,GNAS,CTSZ,CDH26,BBS7,FAT4,SLC7A11,KCNN3,SPRR2B,SPRR4,CGN,PI4KB,PIP5K1A,ANXA9,CTSK,FCGR1,CD160,GJA5,PDE4DIP,N…
GO:CC	postsynapse	GO:0098794	3.64357e-11	10.4385	753	1506	94	27317	OPRK1,MOB4,ERBB4,ARPC2,EPHA4,RGS7,RPS6KC1,ZFP804A,SRC,ATP1A1,ANK2,NCDN,AKAP9,HTR5A,GABRA2,CADPS2,EXOC4,LRRTM4,GRM7,PLEKHA5,SORBS2,VPS35,CADM1,SYNE1,WASF1,ANK3,BCR,ADORA2A,SYN3,ATP2B1,GRIP1,GLRA1,GRIA1,SHISA6,SIPA1L1,CLTB,SLC6A3,CAST,ERC2,PCDH17,SLITRK1,CDH10,FAIM2,SHISA9,IGSF11,APP,GRIK1,PDPK1,LRFN2,EPB41L3,CRIPT,KCTD16,DCC,ADD3,CASK,FRMPD4,ATP1A2,DLGAP4,CABP1,GABRP,BMPR2,PKP4,NAPB,SYNDIG1,KCNB1,…
GO:CC	plasma membrane region	GO:0098590	2.50331e-10	9.60148	1352	1506	139	27317	OPRK1,SNTG1,ERBB4,ARPC2,EPHA4,SLC41A1,CRB1,HMCN1,RGS7,KCNJ3,LRP2,TFPI,JAG1,SRC,GNAS,BBS7,SLC7A11,PIP5K1A,CTSK,ATP1A1,ANK2,SLC7A13,SGIP1,AKAP9,HTR5A,GABRA2,SLC7A1,CFTR,CADPS2,GRM8,LRRTM4,GRM7,CEACAM9,AP2S1,SLC28A1,STX1B,INSR,SORBS2,CNTNAP4,CNTN5,CADM1,ANXA2,MYO6,ITGA9,SYNE1,AKAP7,ANK3,ADORA2A,ATP2B1,RAB21,GRIP1,GLRA1,GRIA1,SHISA6,CNTNAP1,NRXN3,DSP,CLTB,SLC6A3,SLC6A18,NKD2,ADGRV1,HTR1A,PDE4D,ERC2,P…
GO:CC	dendritic tree	GO:0097447	3.14696e-10	9.50211	781	1506	94	27317	OPRK1,MOB4,ERBB4,ARPC2,EPHA4,DNER,BRINP3,OLFR16,RGS7,LRP2,ZFP804A,SPG11,GNAS,SH3GL2,NCDN,AKAP9,HTR5A,CRMP1,KCNIP4,GABRA2,EPHA5,CFTR,EXOC4,GRM7,NTF3,GLRX3,INSR,ABHD13,SORBS2,CNTNAP4,FAT3,KIRREL3,CADM1,TPBG,WASF1,ANK3,ZWINT,BCR,ADORA2A,ATP2B1,GRIP1,KIF5A,GLRA1,GRIA1,SHISA6,SIPA1L1,HTR1A,PLK2,KLHL1,SLC38A2,ADCY9,SHISA9,ALCAM,HTR1F,APP,CRIPT,RIT2,CASK,FGF13,DCX,TRPC5,HTR2C,FRMPD4,ATP1A2,DLGAP4,PPT1,M…
GO:CC	dendrite	GO:0030425	6.66096e-10	9.17646	779	1506	93	27317	OPRK1,MOB4,ERBB4,ARPC2,EPHA4,DNER,BRINP3,OLFR16,RGS7,LRP2,ZFP804A,SPG11,GNAS,SH3GL2,NCDN,AKAP9,HTR5A,CRMP1,KCNIP4,GABRA2,EPHA5,CFTR,EXOC4,GRM7,NTF3,GLRX3,INSR,ABHD13,SORBS2,CNTNAP4,FAT3,KIRREL3,CADM1,TPBG,WASF1,ANK3,ZWINT,BCR,ADORA2A,ATP2B1,GRIP1,KIF5A,GLRA1,GRIA1,SHISA6,SIPA1L1,HTR1A,PLK2,KLHL1,SLC38A2,ADCY9,SHISA9,ALCAM,HTR1F,APP,CRIPT,CASK,FGF13,DCX,TRPC5,HTR2C,FRMPD4,ATP1A2,DLGAP4,PPT1,MME,CA…
GO:CC	postsynaptic specialization	GO:0099572	1.03899e-09	8.98339	437	1506	63	27317	ERBB4,EPHA4,RPS6KC1,SRC,ATP1A1,ANK2,AKAP9,HTR5A,GABRA2,EXOC4,LRRTM4,PLEKHA5,SORBS2,VPS35,CADM1,BCR,ADORA2A,SYN3,GRIP1,GLRA1,GRIA1,SHISA6,SIPA1L1,CAST,ERC2,SLITRK1,CDH10,SHISA9,IGSF11,PDPK1,LRFN2,EPB41L3,CRIPT,DCC,ADD3,CASK,FRMPD4,DLGAP4,CABP1,BMPR2,PKP4,SYNDIG1,P2RY1,SLITRK3,LYN,PTPRZ1,GRID2,ERC1,CACNG3,GSG1L,GRIK2,SPTBN1,STAT3,TANC2,DTNB,NTRK2,GRID1,PDZD2,DROSHA,SOS1,EEF2K,IQSEC1,DAGLA
GO:CC	neuron to neuron synapse	GO:0098984	2.08286e-09	8.68134	433	1506	62	27317	ERBB4,EPHA4,RPS6KC1,SRC,ATP1A1,ANK2,SH3GL2,AKAP9,EXOC4,LRRTM4,GRM7,PLEKHA5,SORBS2,VPS35,CADM1,AKAP7,BCR,ADORA2A,SYN3,GRIP1,GRIA1,SHISA6,SIPA1L1,CAST,ERC2,SLITRK1,SHISA9,IGSF11,PDPK1,LRFN2,EPB41L3,CRIPT,DCC,ADD3,CASK,FRMPD4,CABP1,BMPR2,PKP4,SYNDIG1,P2RY1,SLITRK3,LYN,PTPRD,PTPRZ1,GRID2,ERC1,CACNG3,GSG1L,GRIK2,SPTBN1,STAT3,TANC2,DTNB,NTRK2,GRID1,PDZD2,DROSHA,SOS1,EEF2K,IQSEC1,DAGLA
GO:CC	asymmetric synapse	GO:0032279	4.06476e-09	8.39096	407	1506	59	27317	ERBB4,EPHA4,RPS6KC1,SRC,ATP1A1,ANK2,AKAP9,EXOC4,LRRTM4,GRM7,PLEKHA5,SORBS2,VPS35,CADM1,BCR,ADORA2A,SYN3,GRIP1,GRIA1,SHISA6,SIPA1L1,CAST,ERC2,SLITRK1,SHISA9,IGSF11,PDPK1,LRFN2,EPB41L3,CRIPT,DCC,ADD3,CASK,FRMPD4,CABP1,BMPR2,PKP4,SYNDIG1,P2RY1,SLITRK3,LYN,PTPRZ1,GRID2,ERC1,CACNG3,GSG1L,GRIK2,SPTBN1,STAT3,TANC2,DTNB,NTRK2,GRID1,PDZD2,DROSHA,SOS1,EEF2K,IQSEC1,DAGLA
GO:CC	neuronal cell body	GO:0043025	4.53453e-09	8.34347	720	1506	86	27317	OPRK1,MOB4,ERBB4,ARPC2,EPHA4,DNER,BRINP3,ASTN1,ITGA4,PDE1A,ZFP804A,GNAS,EEF1A2,KCNN3,PTBP2,ASTN2,SH3GL2,NCDN,AKAP9,DPP6,HTR5A,CRMP1,KCNIP4,GABRA2,EPHA5,CFTR,GRM8,EXOC4,GRM7,INSR,SORBS2,VPS35,GOT2,ARG1,ADORA2A,ATP2B1,PAWR,GRIP1,KIF5A,GLRA1,GRIA1,RBFOX3,SIPA1L1,SLC6A3,HTR1A,ERC2,KLHL1,CSNK1E,SLC38A2,ALCAM,CADM2,APP,TIAM2,PDPK1,CRIPT,ADCYAP1,CASK,DCX,TRPC5,ATP1A2,DLGAP4,PPT1,MME,CABP1,BMPR2,TNN,USH2…
GO:CC	postsynaptic density	GO:0014069	6.01336e-09	8.22088	400	1506	58	27317	ERBB4,EPHA4,RPS6KC1,SRC,ATP1A1,ANK2,AKAP9,EXOC4,LRRTM4,PLEKHA5,SORBS2,VPS35,CADM1,BCR,ADORA2A,SYN3,GRIP1,GRIA1,SHISA6,SIPA1L1,CAST,ERC2,SLITRK1,SHISA9,IGSF11,PDPK1,LRFN2,EPB41L3,CRIPT,DCC,ADD3,CASK,FRMPD4,CABP1,BMPR2,PKP4,SYNDIG1,P2RY1,SLITRK3,LYN,PTPRZ1,GRID2,ERC1,CACNG3,GSG1L,GRIK2,SPTBN1,STAT3,TANC2,DTNB,NTRK2,GRID1,PDZD2,DROSHA,SOS1,EEF2K,IQSEC1,DAGLA
GO:CC	plasma membrane	GO:0005886	7.59914e-09	8.11924	6519	1506	469	27317	OPRK1,SNTG1,JPH1,TMEFF2,STK17B,RFTN2,BOLL,PLCL1,ERBB4,ATIC,CXCR2,CXCR1,ARPC2,VIL1,SLC4A3,EPHA4,DNER,DPP10,SLC41A1,CRB1,HMCN1,ASTN1,OLFR16,RGS7,KCTD3,IL2RA,PIP4K2A,GPR158,KCNT1,OLFR342,ACVR2A,KCNJ3,KCNH7,LRP2,NFE2L2,OSBPL6,ITGA4,NUP35,ZFP804A,TFPI,RASGRP1,SPG11,JAG1,SRC,PREX1,GNAS,CDH26,BBS7,FAT4,SLC7A11,KCNN3,SPRR2B,CGN,PI4KB,PIP5K1A,ANXA9,CTSK,FCGR1,CD160,GJA5,NOTCH2,WARS2,CD2,ATP1A1,OLFM3,PLPPR…
GO:CC	intrinsic component of plasma membrane	GO:0031226	8.62687e-09	8.06415	1599	1506	152	27317	OPRK1,ERBB4,EPHA4,DPP10,OLFR16,ACVR2A,KCNJ3,KCNH7,ITGA4,FCGR1,CD160,GJA5,NOTCH2,CD2,ATP1A1,OLFM3,PLPPR5,ANK2,MMP16,SLC24A2,AKAP9,SEMA3D,DPP6,HTR5A,KCNIP4,GABRA2,ADGRL3,EPHA5,VMN2R8,VMN2R9,ADGRD1,CFTR,GRM8,LRRTM4,GRM7,PRMT8,VMN2R56,MILL2,SLC28A1,VMN2R72,TENM4,STX1B,INSR,CNTNAP4,CNTN5,KIRREL3,CADM1,ITGA9,PERP,PCDH15,ADORA2A,GGT1,ATP2B1,LGR5,TSPAN8,GLRA1,GRIA1,SHISA6,FLRT2,VMN1R188,VMN1R212,VMN1R215…
GO:CC	cell body	GO:0044297	2.60461e-08	7.58426	807	1506	91	27317	OPRK1,MOB4,ERBB4,ARPC2,EPHA4,DNER,BRINP3,ASTN1,ITGA4,PDE1A,ZFP804A,GNAS,EEF1A2,KCNN3,PTBP2,ASTN2,SH3GL2,NCDN,AKAP9,DPP6,HTR5A,CRMP1,KCNIP4,GABRA2,EPHA5,CFTR,GRM8,EXOC4,GRM7,INSR,SORBS2,VPS35,GOT2,ARG1,ADORA2A,ATP2B1,PAWR,GRIP1,KIF5A,GLRA1,GRIA1,RBFOX3,SIPA1L1,SLC6A3,HTR1A,ERC2,KLHL1,CSNK1E,SLC38A2,ALCAM,CADM2,APP,TIAM2,EZR,PDPK1,CRIPT,ADCYAP1,RIT2,DPYSL3,CASK,DCX,TRPC5,ATP1A2,DLGAP4,PPT1,MME,CABP…
GO:CC	cellular anatomical entity	GO:0110165	5.49827e-08	7.25977	22745	1506	1339	27317	OPRK1,ST18,PCMTD1,SNTG1,EYA1,JPH1,DEFB41,OGFRL1,4931408C20RIK,TMEFF2,OSGEPL1,STK17B,HECW2,PGAP1,SF3B1,MOB4,RFTN2,BOLL,PLCL1,HSFY2,SATB2,CPS1,ERBB4,ATIC,IGFBP5,TNS1,CXCR2,CXCR1,ARPC2,VIL1,USP37,ZFP142,DNAJB2,SLC4A3,EPHA4,DNER,CAB39,SPP2,DPP10,SLC41A1,MDM4,CRB1,BRINP3,PLA2G4A,HMCN1,EDEM3,SEC16B,ASTN1,VSIG8,OLFR16,RGS7,CEP170,DUSP10,KCTD3,PROX1,RPS6KC1,ANGEL2,DTL,LAMB3,IL2RA,ANKRD16,MALRD1,PIP4K2A,M…
GO:CC	integral component of plasma membrane	GO:0005887	5.81947e-08	7.23512	1515	1506	143	27317	OPRK1,ERBB4,EPHA4,DPP10,OLFR16,ACVR2A,KCNJ3,KCNH7,ITGA4,FCGR1,GJA5,NOTCH2,ATP1A1,OLFM3,PLPPR5,ANK2,MMP16,SLC24A2,AKAP9,SEMA3D,DPP6,HTR5A,KCNIP4,GABRA2,ADGRL3,EPHA5,VMN2R8,VMN2R9,ADGRD1,CFTR,GRM8,LRRTM4,GRM7,VMN2R56,MILL2,SLC28A1,VMN2R72,TENM4,STX1B,INSR,CNTNAP4,KIRREL3,CADM1,ITGA9,PERP,PCDH15,ADORA2A,GGT1,ATP2B1,LGR5,TSPAN8,GLRA1,GRIA1,SHISA6,FLRT2,VMN1R188,VMN1R212,VMN1R215,VMN1R220,SLC6A3,SLC6A…
GO:CC	endomembrane system	GO:0012505	5.90184e-08	7.22901	4164	1506	319	27317	OPRK1,JPH1,PGAP1,MOB4,ARPC2,DNAJB2,EPHA4,DNER,BRINP3,PLA2G4A,EDEM3,SEC16B,ASTN1,RGS7,DUSP10,RPS6KC1,DTL,MALRD1,CERS6,LRP2,NFE2L2,OSBPL6,CERKL,DNAJC10,NUP35,HSD17B12,RASGRP1,SRC,GNAS,CTSZ,CYP7B1,SLC7A11,PI4KB,VPS45,BCL9,PDE4DIP,SEC22B,HSD3B1,CD2,ATP1A1,OLFM3,AGL,SNX7,UGT8A,ANK2,ASTN2,SH3GL2,SGIP1,OSBPL9,AGBL4,NCDN,PTP4A2,AKAP9,STEAP1,HTR5A,HADHB,SELENOI,HS3ST1,GABRA2,OCIAD2,CWH43,SRP72,EPHA5,PARM1…
GO:CC	axon	GO:0030424	1.27481e-07	6.89455	781	1506	87	27317	OPRK1,ARPC2,EPHA4,LRP2,ITGA4,ZFP804A,SPG11,CTSZ,ATP1A1,PTBP2,AGBL4,CRMP1,GABRA2,ADGRL3,EPHA5,AUTS2,EXOC4,GRM7,NTF3,STX1B,SYT8,INSR,CNTN5,NTM,KIRREL3,CADM1,TPBG,ANK3,BCR,ADORA2A,PAWR,RAB21,KIF5A,GLRA1,GRIA1,CNTNAP1,SLC6A3,HTR1A,AP3M1,ERC2,PCDH9,CSNK1E,SLC38A2,ADCY9,ALCAM,CADM2,NCAM2,APP,TIAM2,TNFRSF21,EPB41L3,ADCYAP1,DPYSL3,DCC,FGF13,DCX,TRPC5,PPT1,MME,CABP1,TRPA1,BMPR2,TNN,KLHL20,USH2A,SYT13,KCNB…
GO:CC	synaptic membrane	GO:0097060	1.96399e-07	6.70686	448	1506	59	27317	OPRK1,ERBB4,EPHA4,RGS7,KCNJ3,ANK2,AKAP9,HTR5A,GABRA2,CADPS2,GRM8,LRRTM4,GRM7,STX1B,CNTNAP4,CNTN5,CADM1,SYNE1,ANK3,ADORA2A,ATP2B1,GRIP1,GLRA1,GRIA1,SHISA6,CNTNAP1,NRXN3,CLTB,SLC6A3,HTR1A,ERC2,PCDH17,SLITRK1,CDH10,FAIM2,SHISA9,GRIK1,LRFN2,KCTD16,DCC,CASK,PSEN2,GABRP,SYNDIG1,KCNB1,P2RY1,SLITRK3,PTPRD,GRIK3,IGSF21,PTPRZ1,GRID2,CACNG3,GSG1L,GRIK2,ERBB3,GRID1,NRXN1,DAGLA
GO:CC	cell-cell junction	GO:0005911	3.49442e-07	6.45662	525	1506	65	27317	EPHA4,CRB1,HMCN1,JAG1,CGN,GJA5,CD2,ATP1A1,ANK2,GJB5,ADGRL3,EPHA5,TCHP,MAGI1,KIRREL3,CADM1,PERP,AHI1,ANK3,GRIA1,CNTNAP1,FLRT2,DSP,PCDH9,CDH10,CDH12,TWF1,IGSF11,APP,EZR,EPB41L3,PGM5,ADD3,CASK,FGF13,PARD3B,ATP1A2,CDC42BPA,RAP2B,SLC4A1,BMPR2,CDH20,SDCCAG8,PKP4,LYN,AQP3,IGSF21,ADCYAP1R1,ARHGAP17,ITGAL,GJA1,CTNNA3,PMP22,TBCD,PDZD2,CDH6,CLDN8,EFNA5,NRXN1,DSC3,PIK3R1,CDC42BPB,AHNAK,OCLN,MARVELD2
GO:CC	anchoring junction	GO:0070161	3.516e-07	6.45395	671	1506	77	27317	TNS1,ARPC2,EPHA4,CRB1,HMCN1,XIRP2,JAG1,SRC,CGN,GJA5,CD2,ATP1A1,ANK2,GJB5,ADGRL3,EPHA5,TCHP,MAGI1,SORBS2,KIRREL3,CADM1,PERP,AHI1,WASF1,ANK3,GRIA1,CNTNAP1,FLRT2,DSP,PCDH9,CDH10,CDH12,TWF1,LPP,IGSF11,APP,EZR,PDPK1,EPB41L3,PGM5,ADD3,CASK,FGF13,PARD3B,ATP1A2,CDC42BPA,RAP2B,SLC4A1,ITGB8,BMPR2,CDH20,SDCCAG8,APBB1IP,PKP4,LYN,AQP3,IGSF21,ADCYAP1R1,ARHGAP17,ITGAL,GJA1,CTNNA3,TNS3,PMP22,TBCD,PDZD2,CDH6,CLDN…
GO:CC	integral component of synaptic membrane	GO:0099699	8.83439e-07	6.05382	215	1506	36	27317	OPRK1,ERBB4,EPHA4,KCNJ3,HTR5A,GABRA2,GRM8,LRRTM4,GRM7,STX1B,CNTNAP4,CADM1,ADORA2A,ATP2B1,GLRA1,GRIA1,SHISA6,SLC6A3,HTR1A,PCDH17,SLITRK1,CDH10,SHISA9,LRFN2,DCC,PSEN2,P2RY1,SLITRK3,PTPRD,PTPRZ1,GRID2,CACNG3,GSG1L,GRID1,NRXN1,DAGLA
GO:CC	presynapse	GO:0098793	1.62073e-06	5.79029	619	1506	71	27317	OPRK1,ERBB4,ARPC2,EPHA4,RGS7,KCNJ3,ZFP804A,VPS45,SEC22B,SH3GL2,SGIP1,GABRA2,RIMBP2,CADPS2,GRM8,EXOC4,GRM7,NTF3,PPFIBP1,STX1B,SYT8,CLN8,VPS35,CNTNAP4,CNTN5,KIRREL3,CADM1,TPBG,ADORA2A,SYN3,ATP2B1,GLRA1,GRIA1,CNTNAP1,NRXN3,STON2,CLTB,SLC6A3,MCTP1,HTR1A,ERC2,PCDH17,CDH10,APP,ADCYAP1,KCTD16,CASK,PSEN2,PPT1,MME,TNN,USH2A,NAPB,SYNDIG1,PFN2,P2RY1,PTPRD,GRIK3,IGSF21,GIT2,ERC1,MCTP2,PRKCB,GRIK2,PTPRN2,NTRK…
GO:CC	intrinsic component of synaptic membrane	GO:0099240	2.99059e-06	5.52424	235	1506	37	27317	OPRK1,ERBB4,EPHA4,KCNJ3,HTR5A,GABRA2,GRM8,LRRTM4,GRM7,STX1B,CNTNAP4,CNTN5,CADM1,ADORA2A,ATP2B1,GLRA1,GRIA1,SHISA6,SLC6A3,HTR1A,PCDH17,SLITRK1,CDH10,SHISA9,LRFN2,DCC,PSEN2,P2RY1,SLITRK3,PTPRD,PTPRZ1,GRID2,CACNG3,GSG1L,GRID1,NRXN1,DAGLA
GO:CC	presynaptic membrane	GO:0042734	5.80571e-06	5.23614	190	1506	32	27317	OPRK1,ERBB4,EPHA4,KCNJ3,CADPS2,GRM8,GRM7,STX1B,CNTNAP4,CNTN5,CADM1,ADORA2A,ATP2B1,GLRA1,GRIA1,CNTNAP1,NRXN3,CLTB,SLC6A3,HTR1A,ERC2,PCDH17,CDH10,KCTD16,CASK,PSEN2,P2RY1,PTPRD,GRIK3,IGSF21,GRIK2,NRXN1
GO:CC	postsynaptic membrane	GO:0045211	6.33171e-06	5.19848	317	1506	44	27317	OPRK1,ERBB4,EPHA4,RGS7,ANK2,AKAP9,HTR5A,GABRA2,CADPS2,LRRTM4,GRM7,CADM1,SYNE1,ANK3,ADORA2A,GRIP1,GLRA1,GRIA1,SHISA6,SLC6A3,PCDH17,SLITRK1,CDH10,FAIM2,SHISA9,GRIK1,LRFN2,KCTD16,DCC,GABRP,SYNDIG1,KCNB1,P2RY1,SLITRK3,GRIK3,IGSF21,PTPRZ1,GRID2,CACNG3,GSG1L,GRIK2,ERBB3,GRID1,DAGLA
GO:CC	intrinsic component of membrane	GO:0031224	1.12619e-05	4.94839	7077	1506	482	27317	OPRK1,JPH1,4931408C20RIK,TMEFF2,PGAP1,ERBB4,CXCR2,CXCR1,DNAJB2,SLC4A3,EPHA4,DNER,DPP10,SLC41A1,CRB1,BRINP3,ASTN1,VSIG8,OLFR16,IL2RA,MALRD1,GPR158,KCNT1,OLFR342,ACVR2A,KCNJ3,KCNH7,CERS6,LRP2,ITGA4,HSD17B12,D430041D05RIK,JAG1,MANBAL,GNAS,CDH26,CYP7B1,FAT4,SLC7A11,KCNN3,4930558C23RIK,VPS45,FCGR1,CD160,GJA5,SEC22B,NOTCH2,HSD3B1,CD2,IGSF3,ATP1A1,OLFM3,PLPPR5,UGT8A,ANK2,MMP16,CNGB3,SLC7A13,ASTN2,SLC24A…
GO:CC	cytoskeleton	GO:0005856	2.46297e-05	4.60854	2321	1506	187	27317	SNTG1,STK17B,HECW2,CXCR2,ARPC2,VIL1,CEP170,DTL,MYO3A,XIRP2,NFE2L2,TTC30A1,ZFP804A,SRC,CDH26,BBS7,SLC7A11,CGN,PDE4DIP,SPAG17,MYOZ2,ANK2,ALPK1,TTLL7,AGBL4,CDK6,AKAP9,CFAP69,CRMP1,LIMCH1,TEC,TCHP,AUTS2,CAPZA2,RAB11FIP5,ALMS1,AKAP13,STX1B,WRN,DCTN6,SORBS2,MYLK3,CCNB2,CGNL1,MYO6,SYNE1,MAP7,AHI1,ARHGAP18,WASF1,ANK3,CCDC6,ADORA2A,PAWR,NAV3,KIF5A,MYH13,ACACA,BCAS3,DAAM1,SIPA1L1,DNAL1,CEP128,DSP,MAK,PDE4D…
GO:CC	glutamatergic synapse	GO:0098978	3.91245e-05	4.40755	480	1506	56	27317	ERBB4,ARPC2,EPHA4,RGS7,SRC,SH3GL2,AKAP9,ADGRL3,CADPS2,GRM8,LRRTM4,GRM7,PLEKHA5,VPS35,CADM1,BCR,ADORA2A,SYN3,ATP2B1,GRIP1,PPM1H,GRIA1,SHISA6,SIPA1L1,ERC2,PCDH17,SLITRK1,CDH10,SHISA9,ABLIM3,CBLN2,FRMPD4,DLGAP4,CABP1,NAPB,PFN2,P2RY1,LYN,PTPRD,GRIK3,PTPRZ1,GRID2,ERC1,CACNG3,GSG1L,GRIK2,SPTBN1,STAT3,TANC2,NTRK2,GRID1,IL1RAP,PRKCE,NRXN1,GPC6,IQSEC1
GO:CC	integral component of membrane	GO:0016021	3.94193e-05	4.40429	6906	1506	468	27317	OPRK1,JPH1,4931408C20RIK,TMEFF2,PGAP1,ERBB4,CXCR2,CXCR1,SLC4A3,EPHA4,DNER,DPP10,SLC41A1,CRB1,BRINP3,ASTN1,VSIG8,OLFR16,IL2RA,MALRD1,GPR158,KCNT1,OLFR342,ACVR2A,KCNJ3,KCNH7,CERS6,LRP2,ITGA4,HSD17B12,D430041D05RIK,JAG1,MANBAL,GNAS,CDH26,CYP7B1,FAT4,SLC7A11,KCNN3,4930558C23RIK,VPS45,FCGR1,GJA5,SEC22B,NOTCH2,HSD3B1,CD2,IGSF3,ATP1A1,OLFM3,PLPPR5,UGT8A,ANK2,MMP16,CNGB3,SLC7A13,ASTN2,SLC24A2,GJB5,CSMD2,…
GO:CC	integral component of presynaptic membrane	GO:0099056	0.000168836	3.77253	109	1506	21	27317	OPRK1,ERBB4,EPHA4,KCNJ3,GRM8,GRM7,STX1B,CNTNAP4,CADM1,ADORA2A,ATP2B1,GLRA1,GRIA1,SLC6A3,HTR1A,PCDH17,CDH10,PSEN2,P2RY1,PTPRD,NRXN1
GO:CC	Golgi apparatus	GO:0005794	0.000211423	3.67485	1518	1506	129	27317	MOB4,EPHA4,PLA2G4A,SEC16B,DUSP10,MALRD1,LRP2,NFE2L2,CERKL,RASGRP1,GNAS,PI4KB,VPS45,BCL9,PDE4DIP,SEC22B,CD2,ATP1A1,OLFM3,OSBPL9,AGBL4,AKAP9,HTR5A,SELENOI,HS3ST1,PARM1,CALN1,CHST12,EXOC4,RAB11FIP5,GRM7,CCDC91,CSGALNACT1,LARGE1,GCNT3,MYO6,SYNE1,PLAGL1,PERP,TRAPPC3L,RAB21,LGR5,SLC35E4,RNF144A,TRAPPC12,RTN1,TMED10,VIPAS39,GCNT2,CLTB,ZDHHC11,TMEM167,PDE4D,AP3M1,TDRD3,DACH1,FAM91A1,TRAPPC9,FMNL3,FAIM2,R…
GO:CC	cytosol	GO:0005829	0.00022355	3.65063	4082	1506	293	27317	OPRK1,MOB4,BOLL,ATIC,USP37,DNAJB2,CAB39,PLA2G4A,RGS7,CEP170,DUSP10,PROX1,DTL,PIP4K2A,XIRP2,NFE2L2,OSBPL6,CERKL,RASGRP1,SPG11,BTBD3,SRC,PREX1,GNAS,YTHDF3,ARMC1,HSPA4L,PMVK,UBE2Q1,PI4KB,PIP5K1A,ANXA9,PRPF3,BOLA1,RNF115,NOTCH2,TTF2,DPYD,ALPK1,WWP1,MUP5,RASEF,SH3GL2,OSBPL9,AGBL4,PSMB2,NCDN,CDK6,PEX1,CDK14,DMTF1,PRKAG2,CRMP1,KCNIP4,PAICS,PARM1,TCHP,PSPH,RABGEF1,CAPZA2,CFTR,ZC3HAV1,PPP1R17,ALMS1,SHQ1,E…
GO:CC	receptor complex	GO:0043235	0.000247626	3.6062	396	1506	47	27317	ERBB4,EPHA4,ACVR2A,LRP2,ITGA4,ARNT,NOTCH2,OLFM3,GABRA2,EPHA5,LRRTM4,GRM7,ARNTL2,INSR,NR3C2,ITGA9,GRIA1,SHISA6,ADGRV1,SHISA9,CD200R1,ALCAM,APP,LHCGR,KCTD16,PLXNB3,HTR2C,ITGB8,GABRP,BMPR2,APBB1IP,LRP1B,BMPR1B,LYN,GRIK3,CSF3R,ADCYAP1R1,GRID2,ITPR2,CACNG3,ITGAL,GRIK2,ERBB3,PTPRN2,NTRK2,GHR,GPR101
GO:CC	intrinsic component of presynaptic membrane	GO:0098889	0.000297944	3.52587	122	1506	22	27317	OPRK1,ERBB4,EPHA4,KCNJ3,GRM8,GRM7,STX1B,CNTNAP4,CNTN5,CADM1,ADORA2A,ATP2B1,GLRA1,GRIA1,SLC6A3,HTR1A,PCDH17,CDH10,PSEN2,P2RY1,PTPRD,NRXN1
GO:CC	intracellular anatomical structure	GO:0005622	0.00033911	3.46966	17357	1506	1043	27317	OPRK1,ST18,PCMTD1,SNTG1,EYA1,JPH1,OSGEPL1,STK17B,HECW2,PGAP1,SF3B1,MOB4,BOLL,PLCL1,HSFY2,SATB2,CPS1,ERBB4,ATIC,CXCR2,ARPC2,VIL1,USP37,ZFP142,DNAJB2,EPHA4,DNER,CAB39,MDM4,CRB1,BRINP3,PLA2G4A,HMCN1,EDEM3,SEC16B,ASTN1,RGS7,CEP170,DUSP10,PROX1,RPS6KC1,ANGEL2,DTL,ANKRD16,MALRD1,PIP4K2A,MSRB2,ETL4,MYO3A,ACVR2A,XIRP2,CERS6,LRP2,MTX2,NFE2L2,TTC30A1,OSBPL6,UBE2E3,CERKL,NEUROD1,PPP1R1C,DNAJC10,FRZB,NUP35,Z…
GO:CC	integral component of postsynaptic membrane	GO:0099055	0.00137342	2.8622	164	1506	25	27317	OPRK1,ERBB4,EPHA4,HTR5A,GABRA2,LRRTM4,CADM1,ADORA2A,GLRA1,GRIA1,SHISA6,SLC6A3,PCDH17,SLITRK1,CDH10,SHISA9,LRFN2,DCC,SLITRK3,PTPRZ1,GRID2,CACNG3,GSG1L,GRID1,DAGLA
GO:CC	plasma membrane protein complex	GO:0098797	0.0015495	2.80981	565	1506	58	27317	DPP10,CRB1,ACVR2A,KCNJ3,ITGA4,GNAS,CDH26,GJA5,ATP1A1,OLFM3,SGIP1,GJB5,KHDRBS1,AKAP9,DPP6,KCNIP4,LRRTM4,CACNA2D4,AP2S1,INSR,ANXA2,ITGA9,GRIA1,SHISA6,TMED10,CLTB,SLC6A3,PDE4D,CACNA2D3,CDH10,CDH12,KCNV1,SNTB1,SHISA9,ALCAM,PGM5,ATP1A2,ITGB8,CDH20,CACNA1E,APBB1IP,KCNB1,VCAM1,LYN,GRIK3,GRID2,CACNG3,ITGAL,SLC7A5,GRIK2,GJA1,ERBB3,SCN4A,CDH6,GNA14,KCNV2,CACNB3,AHNAK
GO:CC	cell leading edge	GO:0031252	0.00183274	2.7369	451	1506	49	27317	SNTG1,ARPC2,VIL1,SRC,GNAS,PIP5K1A,LMO4,CDK6,GABRA2,EXOC4,INSR,SORBS2,ANXA2,MYO6,ARHGAP18,WASF1,ADORA2A,ATP2B1,GRIA1,SHISA6,BCAS3,ADGRV1,TWF1,SHISA9,APP,TIAM2,EZR,EPB41L3,PABPC2,DPYSL3,ABLIM3,CDC42BPA,USH2A,APBB1IP,KCNB1,RAB22A,STMN2,UNC5C,SSH1,PTPRZ1,C2CD5,CTNNA3,KITL,SPTBN1,IQGAP2,ENAH,CXCR4,CDC42BPB,DAGLA
GO:CC	endoplasmic reticulum	GO:0005783	0.0031999	2.49486	1830	1506	144	27317	JPH1,PGAP1,DNAJB2,EPHA4,BRINP3,PLA2G4A,EDEM3,SEC16B,CERS6,LRP2,OSBPL6,CERKL,DNAJC10,HSD17B12,RASGRP1,CTSZ,CYP7B1,SLC7A11,PI4KB,SEC22B,HSD3B1,ATP1A1,AGL,UGT8A,HTR5A,HADHB,SELENOI,CWH43,SRP72,EPHA5,CFTR,EIF2AK3,NUP210,EDEM1,GRM7,VWF,NTF3,FSD2,VKORC1,CLN8,SARAF,ABCC12,CASP12,SC5D,TPBG,MAP3K5,MOXD1,AKAP7,TRAPPC3L,ANK3,GGT1,RTCB,TMCC3,RAB21,GRIP1,RDH16,GRIA1,RTN1,DHRS7,TMED10,SEL1L,FLRT2,TCL1,PTDSS1,Z…
GO:CC	intrinsic component of postsynaptic membrane	GO:0098936	0.00398984	2.39904	174	1506	25	27317	OPRK1,ERBB4,EPHA4,HTR5A,GABRA2,LRRTM4,CADM1,ADORA2A,GLRA1,GRIA1,SHISA6,SLC6A3,PCDH17,SLITRK1,CDH10,SHISA9,LRFN2,DCC,SLITRK3,PTPRZ1,GRID2,CACNG3,GSG1L,GRID1,DAGLA
GO:CC	integral component of postsynaptic specialization membrane	GO:0099060	0.0045682	2.34025	103	1506	18	27317	ERBB4,HTR5A,GABRA2,LRRTM4,GLRA1,GRIA1,SHISA6,SLITRK1,CDH10,SHISA9,LRFN2,DCC,SLITRK3,PTPRZ1,GRID2,CACNG3,GSG1L,GRID1
GO:CC	site of polarized growth	GO:0030427	0.00496091	2.30444	221	1506	29	27317	ARPC2,EPHA4,LRP2,ITGA4,ZFP804A,CTSZ,PTBP2,CRMP1,FRYL,AUTS2,EXOC4,KIF5A,ERC2,PCDH9,CSNK1E,APP,TIAM2,DPYSL3,DCC,FGF13,DCX,TRPC5,STMN2,UNC5C,SSH1,FRY,PTPRZ1,NTRK2,NRXN1
GO:CC	nucleoplasm	GO:0005654	0.00518699	2.28508	3844	1506	269	27317	OPRK1,EYA1,JPH1,SF3B1,SATB2,CXCR2,ARPC2,MDM4,DUSP10,PROX1,ANGEL2,DTL,NFE2L2,CERKL,NUP35,MACROD2,SRC,NELFCD,RALYL,MAML3,CHTOP,PIP5K1A,ARNT,CTSK,PRPF3,ANP32E,NOTCH2,WARS2,CD2,ORC3,RNF38,BNC2,PSMB2,PHC2,KHDRBS1,CDK6,CDK14,DMTF1,PRKAG2,PARM1,FZD10,ADGRD1,BAZ1B,CADPS2,RMND5A,MAGI1,SHQ1,BMS1,PLEKHA5,ARNTL2,CCDC91,ETHE1,SERGEF,SLC28A1,NARS2,TEAD1,XPO6,SETD1A,STX1B,KAT8,DOCK1,WRN,RBPMS,NR3C2,N4BP1,ZFP423…
GO:CC	actin-based cell projection	GO:0098858	0.00532452	2.27372	245	1506	31	27317	VIL1,EPHA4,CRB1,MYO3A,KCNN3,UBE2Q1,CFTR,EXOC4,LIPC,MYO6,PCDH15,ADGRV1,ANGPT1,TWF1,APP,TIAM2,EZR,FGF13,USH2A,VCAM1,UNC5C,MYO1H,PTPRZ1,SLC10A2,SLC7A5,KITL,DOCK4,DYNC1H1,IQGAP2,PLS3,ENAH
GO:CC	extracellular matrix	GO:0031012	0.00582295	2.23486	497	1506	51	27317	TMEFF2,HMCN1,LAMB3,HSD17B12,CTSZ,ANXA9,NOTCH2,COL11A1,MMP16,ENAM,MMP17,MMRN1,LRRTM4,FBLN2,LRIG1,VWF,ADAMTS17,TENM3,LINGO1,ANXA2,LAMA2,ITIH4,ANGPT1,COL14A1,ADAMTS5,SMOC2,INS1,SMC3,CASK,SERPINI2,NDP,LAMC2,TNN,USH2A,TGM2,FREM2,ADAMTSL1,DMP1,PTPRZ1,ANXA4,COL6A2,DCN,ADAMTS2,HAPLN1,ADAMTS12,EFNA5,FBN2,GPC6,COL2A1,LINGO2,ZP2
GO:CC	exocytic vesicle	GO:0070382	0.00587735	2.23082	258	1506	32	27317	OPRK1,VPS45,SEC22B,SH3GL2,GABRA2,EXOC4,NTF3,STX1B,SYT8,KIRREL3,CADM1,AKAP7,SYN3,ATP2B1,GRIA1,STON2,CLTB,NKD2,MCTP1,APP,DPYSL3,PSEN2,PPT1,MME,SYT13,SYNDIG1,ERC1,MCTP2,PTPRN2,SCAMP1,SV2C,IQSEC1
GO:CC	external encapsulating structure	GO:0030312	0.00648981	2.18777	499	1506	51	27317	TMEFF2,HMCN1,LAMB3,HSD17B12,CTSZ,ANXA9,NOTCH2,COL11A1,MMP16,ENAM,MMP17,MMRN1,LRRTM4,FBLN2,LRIG1,VWF,ADAMTS17,TENM3,LINGO1,ANXA2,LAMA2,ITIH4,ANGPT1,COL14A1,ADAMTS5,SMOC2,INS1,SMC3,CASK,SERPINI2,NDP,LAMC2,TNN,USH2A,TGM2,FREM2,ADAMTSL1,DMP1,PTPRZ1,ANXA4,COL6A2,DCN,ADAMTS2,HAPLN1,ADAMTS12,EFNA5,FBN2,GPC6,COL2A1,LINGO2,ZP2
GO:CC	postsynaptic density membrane	GO:0098839	0.00686512	2.16335	106	1506	18	27317	ERBB4,EPHA4,AKAP9,LRRTM4,GRIA1,SHISA6,SLITRK1,SHISA9,LRFN2,DCC,SYNDIG1,SLITRK3,PTPRZ1,GRID2,CACNG3,GSG1L,GRID1,DAGLA
GO:CC	postsynaptic specialization membrane	GO:0099634	0.00690325	2.16095	147	1506	22	27317	ERBB4,EPHA4,AKAP9,HTR5A,GABRA2,LRRTM4,GLRA1,GRIA1,SHISA6,SLITRK1,CDH10,SHISA9,LRFN2,DCC,SYNDIG1,SLITRK3,PTPRZ1,GRID2,CACNG3,GSG1L,GRID1,DAGLA
GO:CC	integral component of postsynaptic density membrane	GO:0099061	0.00730735	2.13624	69	1506	14	27317	ERBB4,LRRTM4,GRIA1,SHISA6,SLITRK1,SHISA9,LRFN2,DCC,SLITRK3,PTPRZ1,GRID2,CACNG3,GSG1L,GRID1
GO:CC	intrinsic component of postsynaptic specialization membrane	GO:0098948	0.0101421	1.99387	109	1506	18	27317	ERBB4,HTR5A,GABRA2,LRRTM4,GLRA1,GRIA1,SHISA6,SLITRK1,CDH10,SHISA9,LRFN2,DCC,SLITRK3,PTPRZ1,GRID2,CACNG3,GSG1L,GRID1
GO:CC	GABA-ergic synapse	GO:0098982	0.0130482	1.88445	101	1506	17	27317	ERBB4,GABRA2,GRM8,GRM7,CNTNAP4,CNTN5,ATP2B1,NRXN3,HTR1A,ERC2,PCDH17,SLITRK1,CDH10,SLITRK3,ERC1,EFNA5,NRXN1
GO:CC	protein kinase complex	GO:1902911	0.0142786	1.84531	122	1506	19	27317	CAB39,ACVR2A,CDK6,CDK14,PRKAG2,PHKG1,INSR,CCNB2,MAP3K5,PRKDC,XRCC5,ERC1,STRADA,PSMC5,DAPK1,CCNH,WDR41,PYCARD,CCNB1
GO:CC	cell-cell contact zone	GO:0044291	0.0157975	1.80141	83	1506	15	27317	GJA5,ATP1A1,ANK2,ANK3,DSP,PCDH9,PGM5,FGF13,ATP1A2,RAP2B,SLC4A1,PKP4,GJA1,CTNNA3,AHNAK
GO:CC	filopodium	GO:0030175	0.0166461	1.77869	113	1506	18	27317	VIL1,EPHA4,MYO3A,KCNN3,UBE2Q1,MYO6,TWF1,APP,TIAM2,EZR,FGF13,VCAM1,UNC5C,PTPRZ1,KITL,DYNC1H1,IQGAP2,ENAH
GO:CC	cell cortex	GO:0005938	0.0167236	1.77667	334	1506	37	27317	HMCN1,CTSZ,SPRR4,PDE4DIP,ASTN2,FRYL,TCHP,RIMBP2,CAPZA2,EXOC4,EXOC6B,GRM7,AKAP13,GLRX3,ANXA2,TCL1,CLTB,ERC2,EZR,SPINK5,ADD3,PARD3B,CAP1,SLC4A1,LAMC2,DSTN,FRY,ERC1,C2CD5,ITPR2,PRKCB,ANLN,SPTBN1,DYNC1H1,CRIP2,PDZD4,SPTA1
GO:CC	growth cone	GO:0030426	0.0194223	1.7117	214	1506	27	27317	ARPC2,EPHA4,LRP2,ITGA4,ZFP804A,CTSZ,PTBP2,CRMP1,AUTS2,EXOC4,KIF5A,ERC2,PCDH9,CSNK1E,APP,TIAM2,DPYSL3,DCC,FGF13,DCX,TRPC5,STMN2,UNC5C,SSH1,PTPRZ1,NTRK2,NRXN1
GO:CC	intrinsic component of postsynaptic density membrane	GO:0099146	0.0194477	1.71113	75	1506	14	27317	ERBB4,LRRTM4,GRIA1,SHISA6,SLITRK1,SHISA9,LRFN2,DCC,SLITRK3,PTPRZ1,GRID2,CACNG3,GSG1L,GRID1
GO:CC	distal axon	GO:0150034	0.0249567	1.60281	379	1506	40	27317	OPRK1,ARPC2,EPHA4,LRP2,ITGA4,ZFP804A,CTSZ,PTBP2,CRMP1,AUTS2,EXOC4,GRM7,TPBG,KIF5A,GLRA1,SLC6A3,ERC2,PCDH9,CSNK1E,APP,TIAM2,ADCYAP1,DPYSL3,DCC,FGF13,DCX,TRPC5,TNN,USH2A,STMN2,UNC5C,GRIK3,SSH1,GIT2,PTPRZ1,PRKCB,GRIK2,PTPRN2,NTRK2,NRXN1
GO:CC	actin cytoskeleton	GO:0015629	0.0259031	1.58665	499	1506	49	27317	STK17B,ARPC2,VIL1,MYO3A,XIRP2,SRC,CGN,MYOZ2,CRMP1,LIMCH1,AUTS2,CAPZA2,AKAP13,DCTN6,MYLK3,CGNL1,MYO6,PAWR,MYH13,ACACA,DAAM1,SIPA1L1,TWF1,LPP,EZR,DPYSL3,ABLIM3,MYO5B,PGM5,ARHGAP6,CDC42BPA,CAP1,DSTN,RAB22A,VCAM1,MYO18B,MYO1H,PRKCB,D7ERTD443E,ANLN,SPTBN1,CRK,DAPK1,ASAP1,PLS3,SPTA1,ENAH,CDC42BPB,AHNAK
GO:CC	transferase complex, transferring phosphorus-containing groups	GO:0061695	0.0281601	1.55037	267	1506	31	27317	CAB39,ACVR2A,CDK6,CDK14,PRKAG2,PHKG1,INSR,CCNB2,MYO6,MAP3K5,POLR3B,PRKDC,GTF2A1L,RPRD1A,SOCS6,TAF6L,TAF1,XRCC5,ERC1,POLR3E,BECN1,STRADA,PSMC5,PFKP,DAPK1,CCNH,WDR41,PIK3R1,PYCARD,AK6,CCNB1
GO:CC	collagen-containing extracellular matrix	GO:0062023	0.0296518	1.52795	369	1506	39	27317	TMEFF2,HMCN1,LAMB3,CTSZ,ANXA9,COL11A1,MMRN1,FBLN2,VWF,ADAMTS17,ANXA2,LAMA2,ITIH4,ANGPT1,COL14A1,ADAMTS5,SMOC2,INS1,SMC3,CASK,SERPINI2,NDP,LAMC2,TNN,USH2A,TGM2,FREM2,ADAMTSL1,PTPRZ1,ANXA4,COL6A2,DCN,ADAMTS2,HAPLN1,EFNA5,FBN2,GPC6,COL2A1,ZP2
GO:CC	presynaptic active zone	GO:0048786	0.0414144	1.38285	90	1506	15	27317	RIMBP2,GRM8,GRM7,PPFIBP1,STX1B,ADORA2A,ATP2B1,CNTNAP1,ERC2,CDH10,APP,P2RY1,ERC1,NTRK2,NRXN1
GO:CC	axonemal central apparatus	GO:1990716	0.0460502	1.33677	6	1506	4	27317	SPAG17,CFAP69,SPAG16,HYDIN
GO:CC	cell surface	GO:0009986	0.0462711	1.33469	1117	1506	91	27317	CXCR2,CXCR1,ARPC2,SLC4A3,EPHA4,ASTN1,IL2RA,ACVR2A,KCNJ3,LRP2,ITGA4,TFPI,CTSZ,SLC7A11,ANXA9,CTSK,FCGR1,NOTCH2,CD2,FZD1,DPP6,EPHA5,FZD10,CFTR,GRM7,CLEC4N,MILL2,INSR,UNC5D,GOT2,NTM,ANXA2,LIPC,ITGA9,MAP3K5,ENPP1,ANK3,TSPAN8,GLRA1,GRIA1,TPO,SLC6A3,ADGRV1,SLITRK6,NFAM1,CD200R1,ALCAM,ROBO1,APP,GM7030,9830107B12RIK,A530064D06RIK,LRFN2,LHCGR,DCC,PLXNB3,HTR2C,SLC4A1,ITGB8,NDP,BMPR2,TNN,KCNB1,SUCNR1,SLITRK3…
KEGG	Axon guidance	KEGG:04360	0.00263811	2.57871	178	581	28	8583	EPHA4,SRC,RGS3,SEMA3D,EPHA5,SRGAP3,UNC5D,SLIT3,ROBO1,ROBO2,PDPK1,ABLIM3,DCC,PLXNB3,BMPR2,UNC5C,BMPR1B,SSH1,MET,CXCL12,SEMA5A,EPHA6,EFNA5,ENAH,ARHGEF12,PRKCA,PIK3R1,CXCR4
KEGG	Aldosterone-regulated sodium reabsorption	KEGG:04960	0.00335746	2.47399	38	581	11	8583	ATP1A1,INSR,NR3C2,PDPK1,INS1,ATP1A2,SCNN1B,PRKCB,PRKCA,PIK3R1,SCNN1G
KEGG	Non-small cell lung cancer	KEGG:05223	0.0209834	1.67812	69	581	14	8583	CDK6,HGF,KIF5A,FHIT,RARB,PDPK1,AKT3,MET,PRKCB,STAT3,SOS1,PRKCA,PIK3R1,STAT5B
KEGG	Morphine addiction	KEGG:05032	0.0326413	1.48623	89	581	16	8583	KCNJ3,PDE1A,GNAS,PDE7A,GABRA2,PDE7B,PDE4D,ADCY9,KCNJ6,GABRP,GRK3,PRKCB,ADCY2,PDE8B,ADCY5,PRKCA
KEGG	Rap1 signaling pathway	KEGG:04015	0.0330238	1.48117	205	581	28	8583	SRC,GNAS,HGF,MAGI1,INSR,PDGFD,ADORA2A,SIPA1L1,RAPGEF5,ANGPT1,ADCY9,INS1,AKT3,APBB1IP,PFN2,P2RY1,MET,PRKCB,ITGAL,KITL,CRK,DOCK4,ADCY2,ADCY5,EFNA5,ENAH,PRKCA,PIK3R1
REAC	Protein-protein interactions at synapses	REAC:R-MMU-6794362	0.0372625	1.42873	62	622	14	8710	LRRTM4,PPFIBP1,GRIA1,NRXN3,SLITRK1,SLITRK6,LRFN2,EPB41L3,CASK,DLGAP4,SLITRK3,PTPRD,IL1RAP,NRXN1
TF	Factor: ZF5; motif: GSGCGCGR	TF:M00716	2.01113e-22	21.6966	14878	1462	1169	21833	OPRK1,ST18,PCMTD1,EYA1,JPH1,OGFRL1,FAM135A,TMEFF2,OSGEPL1,STK17B,HECW2,PGAP1,ANKRD44,SF3B1,COQ10B,MOB4,BOLL,PLCL1,SATB2,TYW5,UNC80,CPS1,ERBB4,ATIC,IGFBP5,TNS1,ARPC2,VIL1,USP37,ZFP142,DNAJB2,SLC4A3,EPHA4,DNER,CAB39,SPP2,DPP10,SLC41A1,MDM4,BRINP3,PLA2G4A,HMCN1,EDEM3,1700025G04RIK,SEC16B,ASTN1,VSIG8,OLFR16,RGS7,CCDC121,DUSP10,KCTD3,PROX1,RPS6KC1,ANGEL2,DTL,LAMB3,ANKRD16,CARLR,PIP4K2A,MSRB2,4921504E0…
TF	Factor: ZF5; motif: GSGCGCGR; match class: 1	TF:M00716_1	2.34618e-19	18.6296	12090	1462	986	21833	OPRK1,PCMTD1,EYA1,JPH1,OGFRL1,FAM135A,TMEFF2,STK17B,HECW2,PGAP1,ANKRD44,SF3B1,COQ10B,MOB4,BOLL,PLCL1,SATB2,UNC80,ERBB4,IGFBP5,TNS1,ARPC2,USP37,ZFP142,DNAJB2,SLC4A3,EPHA4,DNER,CAB39,DPP10,SLC41A1,MDM4,BRINP3,HMCN1,EDEM3,1700025G04RIK,SEC16B,ASTN1,RGS7,DUSP10,PROX1,RPS6KC1,ANGEL2,DTL,ANKRD16,CARLR,PIP4K2A,OTUD1,GPR158,MYO3A,KCNT1,ACVR2A,KCNJ3,KCNH7,CERS6,LRP2,MTX2,NFE2L2,OSBPL6,UBE2E3,CERKL,NEUROD1…
TF	Factor: ZF5; motif: NRNGNGCGCGCWN; match class: 1	TF:M00333_1	2.05804e-18	17.6865	11224	1462	926	21833	PCMTD1,JPH1,OGFRL1,FAM135A,TMEFF2,OSGEPL1,STK17B,HECW2,PGAP1,ANKRD44,SF3B1,COQ10B,RFTN2,BOLL,PLCL1,SATB2,TYW5,UNC80,ERBB4,IGFBP5,TNS1,CXCR1,ARPC2,VIL1,USP37,ZFP142,DNAJB2,SLC4A3,EPHA4,CAB39,DPP10,SLC41A1,HMCN1,EDEM3,1700025G04RIK,RGS7,DUSP10,PROX1,RPS6KC1,ANGEL2,DTL,ANKRD16,PIP4K2A,MSRB2,4921504E06RIK,OTUD1,GPR158,MYO3A,ACVR2A,KCNH7,CERS6,LRP2,MTX2,NFE2L2,TTC30A1,OSBPL6,UBE2E3,ITGA4,NEUROD1,DNAJC…
TF	Factor: FOXN4; motif: NNWANNCGWMCGCGTCNNNNMT	TF:M04662	3.55735e-17	16.4489	16026	1462	1217	21833	ST18,PCMTD1,EYA1,JPH1,OGFRL1,FAM135A,TMEFF2,OSGEPL1,STK17B,HECW2,PGAP1,ANKRD44,SF3B1,COQ10B,MOB4,BOLL,PLCL1,SATB2,TYW5,CRYGF,UNC80,ERBB4,ATIC,IGFBP5,TNS1,CXCR1,ARPC2,VIL1,USP37,ZFP142,DNAJB2,SLC4A3,EPHA4,DNER,CAB39,SPP2,DPP10,SLC41A1,MDM4,CRB1,BRINP3,PLA2G4A,HMCN1,EDEM3,1700025G04RIK,SEC16B,VSIG8,RGS7,CCDC121,DUSP10,KCTD3,PROX1,RPS6KC1,ANGEL2,DTL,IL2RA,ANKRD16,CARLR,PIP4K2A,ARMC3,MSRB2,OTUD1,ETL4…
TF	Factor: FOXN4; motif: NNWANNCGWMCGCGTCNNNNMT; match class: 1	TF:M04662_1	7.41381e-17	16.13	12809	1462	1021	21833	ST18,PCMTD1,EYA1,JPH1,OGFRL1,FAM135A,TMEFF2,OSGEPL1,STK17B,HECW2,PGAP1,ANKRD44,SF3B1,COQ10B,MOB4,BOLL,PLCL1,SATB2,TYW5,UNC80,ERBB4,IGFBP5,TNS1,ARPC2,VIL1,USP37,ZFP142,DNAJB2,SLC4A3,EPHA4,DNER,CAB39,DPP10,SLC41A1,MDM4,PLA2G4A,HMCN1,EDEM3,1700025G04RIK,RGS7,CCDC121,DUSP10,KCTD3,PROX1,RPS6KC1,ANGEL2,DTL,ANKRD16,PIP4K2A,MSRB2,OTUD1,GPR158,MYO3A,KCNT1,ACVR2A,KCNJ3,KCNH7,CERS6,LRP2,MTX2,NFE2L2,TTC30A1,…
TF	Factor: Egr-2; motif: GCGTGGGCGG	TF:M05494	2.45226e-15	14.6104	7242	1462	640	21833	PCMTD1,EYA1,JPH1,STK17B,HECW2,PGAP1,ANKRD44,SF3B1,MOB4,BOLL,PLCL1,SATB2,UNC80,ERBB4,IGFBP5,USP37,ZFP142,DNAJB2,SLC4A3,DNER,CAB39,SPP2,DPP10,SLC41A1,MDM4,EDEM3,DUSP10,KCTD3,ANGEL2,PIP4K2A,MSRB2,OTUD1,KCNT1,ACVR2A,KCNH7,CERS6,LRP2,MTX2,NFE2L2,OSBPL6,UBE2E3,NEUROD1,DNAJC10,FRZB,ZFP804A,HSD17B12,D430041D05RIK,SPG11,BTBD3,MACROD2,PREX1,GNAS,NELFCD,CTSZ,EDN3,RALYL,YTHDF3,BBS7,HSPA4L,TIPARP,LRBA,UBE2Q1,…
TF	Factor: BEN; motif: CAGCGRNV	TF:M01240	4.66652e-15	14.331	16268	1462	1223	21833	OPRK1,ST18,PCMTD1,EYA1,JPH1,OGFRL1,FAM135A,TMEFF2,STK17B,HECW2,PGAP1,ANKRD44,SF3B1,COQ10B,MOB4,RFTN2,BOLL,PLCL1,HSFY2,SATB2,TYW5,CRYGF,UNC80,CPS1,ERBB4,ATIC,IGFBP5,TNS1,CXCR2,CXCR1,ARPC2,VIL1,USP37,ZFP142,DNAJB2,SLC4A3,EPHA4,DNER,CAB39,SPP2,DPP10,MDM4,BRINP3,PLA2G4A,HMCN1,EDEM3,1700025G04RIK,ASTN1,VSIG8,RGS7,CCDC121,DUSP10,KCTD3,PROX1,RPS6KC1,ANGEL2,DTL,ANKRD16,CARLR,PIP4K2A,ARMC3,MSRB2,4921504E0…
TF	Factor: ZF5; motif: GYCGCGCARNGCNN	TF:M02933	5.17691e-15	14.2859	9523	1462	797	21833	OPRK1,PCMTD1,EYA1,JPH1,OGFRL1,FAM135A,TMEFF2,OSGEPL1,HECW2,PGAP1,ANKRD44,SF3B1,COQ10B,MOB4,BOLL,PLCL1,TYW5,UNC80,ERBB4,TNS1,ARPC2,USP37,DNAJB2,SLC4A3,EPHA4,DNER,CAB39,DPP10,MDM4,HMCN1,1700025G04RIK,RGS7,DUSP10,PROX1,ANGEL2,DTL,ANKRD16,CARLR,PIP4K2A,ARMC3,MSRB2,OTUD1,KCNT1,ACVR2A,KCNH7,CERS6,LRP2,MTX2,NFE2L2,TTC30A1,OSBPL6,UBE2E3,NEUROD1,DNAJC10,ZFP804A,HSD17B12,D430041D05RIK,RASGRP1,JAG1,BTBD3,MA…
TF	Factor: E2F; motif: GGCGSG	TF:M00803	2.566e-14	13.5907	10451	1462	856	21833	PCMTD1,EYA1,JPH1,OGFRL1,FAM135A,TMEFF2,STK17B,HECW2,PGAP1,ANKRD44,SF3B1,COQ10B,BOLL,PLCL1,SATB2,UNC80,ERBB4,IGFBP5,TNS1,ARPC2,USP37,ZFP142,SLC4A3,DNER,CAB39,DPP10,MDM4,PLA2G4A,HMCN1,EDEM3,1700025G04RIK,SEC16B,RGS7,DUSP10,PROX1,ANGEL2,DTL,PIP4K2A,MSRB2,OTUD1,MYO3A,KCNT1,ACVR2A,KCNJ3,KCNH7,LRP2,MTX2,NFE2L2,TTC30A1,OSBPL6,UBE2E3,NEUROD1,DNAJC10,FRZB,ZFP804A,HSD17B12,D430041D05RIK,RASGRP1,JAG1,BTBD3,…
TF	Factor: MOVO-B; motif: GNGGGGG	TF:M01104	2.86122e-14	13.5434	7667	1462	665	21833	OPRK1,PCMTD1,JPH1,OGFRL1,FAM135A,HECW2,PGAP1,COQ10B,MOB4,BOLL,PLCL1,SATB2,UNC80,CPS1,TNS1,USP37,ZFP142,DNAJB2,SLC4A3,EPHA4,SPP2,DPP10,SLC41A1,MDM4,BRINP3,1700025G04RIK,ASTN1,OLFR16,RGS7,CCDC121,DUSP10,DTL,LAMB3,ANKRD16,CARLR,PIP4K2A,ARMC3,4921504E06RIK,OTUD1,KCNT1,ACVR2A,KCNJ3,KCNH7,CERS6,NFE2L2,OSBPL6,UBE2E3,DNAJC10,NUP35,ZFP804A,JAG1,BTBD3,MACROD2,DHX35,PREX1,DOK5,GNAS,CTSZ,ZFP831,EEF1A2,MRPS28…
TF	Factor: Sp1; motif: GGNGGGGGNGGGGGMGGGGCNGGG	TF:M10375	2.47007e-13	12.6073	10781	1462	873	21833	OPRK1,JPH1,OGFRL1,FAM135A,4931408C20RIK,TMEFF2,STK17B,HECW2,PGAP1,ANKRD44,SF3B1,MOB4,BOLL,PLCL1,SATB2,ATIC,IGFBP5,TNS1,ARPC2,VIL1,USP37,ZFP142,DNAJB2,SLC4A3,EPHA4,DNER,SPP2,DPP10,SLC41A1,MDM4,CRB1,BRINP3,1700025G04RIK,SEC16B,ASTN1,VSIG8,OLFR16,RGS7,DUSP10,KCTD3,PROX1,ANGEL2,DTL,LAMB3,ANKRD16,PIP4K2A,ARMC3,MSRB2,4921504E06RIK,OTUD1,GPR158,KCNT1,ACVR2A,KCNH7,CERS6,MTX2,NFE2L2,OSBPL6,UBE2E3,ITGA4,PD…
TF	Factor: E2F; motif: GGCGSG; match class: 1	TF:M00803_1	6.99555e-13	12.1552	7059	1462	615	21833	EYA1,JPH1,OGFRL1,FAM135A,STK17B,HECW2,PGAP1,ANKRD44,COQ10B,BOLL,PLCL1,SATB2,UNC80,ERBB4,IGFBP5,ARPC2,USP37,ZFP142,SLC4A3,DNER,CAB39,DPP10,PLA2G4A,1700025G04RIK,RGS7,DUSP10,ANGEL2,DTL,PIP4K2A,OTUD1,KCNT1,ACVR2A,LRP2,MTX2,OSBPL6,UBE2E3,DNAJC10,ZFP804A,HSD17B12,D430041D05RIK,JAG1,BTBD3,MACROD2,PREX1,GNAS,CTSZ,ATP5E,EDN3,RALYL,HSPA4L,MAML3,TIPARP,LRBA,UBE2Q1,UBAP2L,TUFT1,SETDB1,ARNT,PRPF3,ANP32E,OTUD…
TF	Factor: E2F-1; motif: GNGGGCGGGRMN	TF:M10209	9.62424e-13	12.0166	14278	1462	1094	21833	OPRK1,PCMTD1,EYA1,JPH1,DEFB41,OGFRL1,FAM135A,TMEFF2,STK17B,HECW2,PGAP1,ANKRD44,SF3B1,COQ10B,MOB4,BOLL,PLCL1,SATB2,TYW5,UNC80,CPS1,ERBB4,ATIC,IGFBP5,TNS1,CXCR1,ARPC2,VIL1,USP37,ZFP142,DNAJB2,SLC4A3,EPHA4,DNER,CAB39,SPP2,DPP10,SLC41A1,MDM4,BRINP3,HMCN1,EDEM3,1700025G04RIK,ASTN1,VSIG8,OLFR16,CCDC121,DUSP10,KCTD3,PROX1,RPS6KC1,ANGEL2,DTL,LAMB3,ANKRD16,CARLR,PIP4K2A,MSRB2,4921504E06RIK,OTUD1,GPR158,MY…
TF	Factor: CTCF; motif: NAGGGGGCGCNNKNNNN; match class: 1	TF:M08995_1	1.10764e-12	11.9556	9372	1462	775	21833	OPRK1,PCMTD1,JPH1,OGFRL1,FAM135A,TMEFF2,STK17B,HECW2,PGAP1,ANKRD44,BOLL,PLCL1,SATB2,UNC80,ERBB4,IGFBP5,TNS1,ARPC2,USP37,ZFP142,DNAJB2,SLC4A3,EPHA4,DNER,SPP2,DPP10,SLC41A1,BRINP3,HMCN1,EDEM3,1700025G04RIK,ASTN1,OLFR16,RGS7,DUSP10,PROX1,DTL,LAMB3,ANKRD16,CARLR,PIP4K2A,ARMC3,OTUD1,GPR158,KCNT1,ACVR2A,KCNJ3,KCNH7,CERS6,LRP2,MTX2,NFE2L2,OSBPL6,UBE2E3,ITGA4,CERKL,NEUROD1,FRZB,ZFP804A,RASGRP1,JAG1,BTBD3…
TF	Factor: E2F-3; motif: GGCGGGN	TF:M02089	1.11809e-12	11.9515	11302	1462	904	21833	OPRK1,EYA1,JPH1,OGFRL1,FAM135A,STK17B,HECW2,PGAP1,ANKRD44,SF3B1,MOB4,BOLL,PLCL1,SATB2,TYW5,UNC80,CPS1,ERBB4,ATIC,IGFBP5,TNS1,CXCR1,ARPC2,VIL1,USP37,ZFP142,DNAJB2,SLC4A3,EPHA4,DNER,SPP2,DPP10,SLC41A1,BRINP3,HMCN1,1700025G04RIK,ASTN1,VSIG8,OLFR16,CCDC121,DUSP10,KCTD3,PROX1,RPS6KC1,ANGEL2,LAMB3,ANKRD16,CARLR,PIP4K2A,4921504E06RIK,OTUD1,MYO3A,KCNT1,ACVR2A,KCNJ3,KCNH7,LRP2,MTX2,NFE2L2,TTC30A1,OSBPL6,U…
TF	Factor: ZF5; motif: NRNGNGCGCGCWN	TF:M00333	1.55261e-12	11.8089	14505	1462	1107	21833	OPRK1,PCMTD1,EYA1,JPH1,OGFRL1,FAM135A,TMEFF2,OSGEPL1,STK17B,HECW2,PGAP1,ANKRD44,SF3B1,COQ10B,RFTN2,BOLL,PLCL1,SATB2,TYW5,UNC80,ERBB4,ATIC,IGFBP5,TNS1,CXCR1,ARPC2,VIL1,USP37,ZFP142,DNAJB2,SLC4A3,EPHA4,CAB39,DPP10,SLC41A1,MDM4,PLA2G4A,HMCN1,EDEM3,1700025G04RIK,RGS7,CCDC121,DUSP10,KCTD3,PROX1,RPS6KC1,ANGEL2,DTL,ANKRD16,MALRD1,CARLR,PIP4K2A,ARMC3,MSRB2,4921504E06RIK,OTUD1,GPR158,MYO3A,KCNT1,ACVR2A,KC…
TF	Factor: Kaiso; motif: GCMGGGRGCRGS; match class: 1	TF:M03876_1	2.98281e-12	11.5254	5856	1462	525	21833	JPH1,OGFRL1,FAM135A,TMEFF2,ANKRD44,MOB4,BOLL,PLCL1,SATB2,UNC80,IGFBP5,TNS1,ARPC2,USP37,DNAJB2,EPHA4,CAB39,DPP10,MDM4,HMCN1,EDEM3,1700025G04RIK,ASTN1,DUSP10,PROX1,ANGEL2,ANKRD16,CARLR,GPR158,KCNT1,ACVR2A,KCNH7,CERS6,LRP2,NFE2L2,OSBPL6,UBE2E3,NEUROD1,ZFP804A,SPG11,JAG1,MACROD2,MANBAL,PREX1,DOK5,GNAS,CTSZ,ATP5E,EEF1A2,RALYL,YTHDF3,ARMC1,FAT4,MAML3,TIPARP,LRBA,UBE2Q1,LCE6A,PI4KB,SETDB1,PRPF3,SF3B4,BC…
TF	Factor: RNF96; motif: BCCCGCRGCC	TF:M01199	3.41064e-12	11.4672	6369	1462	562	21833	PCMTD1,OGFRL1,FAM135A,TMEFF2,HECW2,ANKRD44,MOB4,BOLL,PLCL1,SATB2,TYW5,UNC80,ERBB4,ATIC,ARPC2,DNAJB2,SLC4A3,CAB39,MDM4,1700025G04RIK,DUSP10,ANGEL2,DTL,PIP4K2A,ARMC3,MSRB2,OTUD1,ACVR2A,KCNH7,CERS6,LRP2,MTX2,NFE2L2,TTC30A1,UBE2E3,DNAJC10,ZFP804A,D430041D05RIK,SPG11,JAG1,MACROD2,DHX35,PREX1,GNAS,ZFP831,ZFP931,EEF1A2,RALYL,YTHDF3,HSPA4L,MAML3,TIPARP,UBE2Q1,UBAP2L,TCHHL1,PI4KB,SETDB1,ENSA,PRPF3,ANP32E,…
TF	Factor: ZF5; motif: GYCGCGCARNGCNN; match class: 1	TF:M02933_1	6.1283e-12	11.2127	5850	1462	523	21833	PCMTD1,JPH1,OGFRL1,TMEFF2,HECW2,PGAP1,ANKRD44,SF3B1,COQ10B,BOLL,PLCL1,UNC80,ERBB4,USP37,EPHA4,DNER,HMCN1,1700025G04RIK,RGS7,DUSP10,PROX1,ANGEL2,PIP4K2A,MSRB2,OTUD1,KCNT1,ACVR2A,CERS6,LRP2,MTX2,NFE2L2,TTC30A1,OSBPL6,UBE2E3,NEUROD1,DNAJC10,ZFP804A,D430041D05RIK,MACROD2,PREX1,GNAS,NELFCD,CTSZ,ATP5E,EDN3,EEF1A2,RALYL,ARMC1,MAML3,TIPARP,LRBA,OTUD7B,BCL9,NOTCH2,IGSF3,ATP1A1,PLPPR5,SNX7,PTBP2,UGT8A,LMO4…
TF	Factor: Kaiso; motif: SARNYCTCGCGAGAN; match class: 1	TF:M10276_1	7.56265e-12	11.1213	9999	1462	813	21833	PCMTD1,JPH1,OGFRL1,FAM135A,TMEFF2,STK17B,HECW2,PGAP1,ANKRD44,SF3B1,COQ10B,BOLL,PLCL1,SATB2,TYW5,UNC80,ERBB4,ATIC,TNS1,ARPC2,USP37,ZFP142,DNAJB2,EPHA4,DNER,CAB39,DPP10,SLC41A1,EDEM3,1700025G04RIK,ASTN1,RGS7,CCDC121,DUSP10,KCTD3,PROX1,ANGEL2,DTL,ANKRD16,PIP4K2A,MSRB2,4921504E06RIK,GPR158,ACVR2A,KCNH7,CERS6,LRP2,MTX2,NFE2L2,OSBPL6,UBE2E3,NEUROD1,DNAJC10,FRZB,ZFP804A,HSD17B12,D430041D05RIK,SPG11,JAG1…
TF	Factor: Kaiso; motif: SARNYCTCGCGAGAN	TF:M10276	2.22706e-11	10.6523	13536	1462	1041	21833	PCMTD1,SNTG1,EYA1,JPH1,OGFRL1,FAM135A,TMEFF2,OSGEPL1,STK17B,HECW2,PGAP1,ANKRD44,SF3B1,COQ10B,MOB4,BOLL,PLCL1,SATB2,TYW5,UNC80,ERBB4,ATIC,TNS1,ARPC2,USP37,ZFP142,DNAJB2,EPHA4,DNER,CAB39,SPP2,DPP10,SLC41A1,MDM4,EDEM3,1700025G04RIK,SEC16B,ASTN1,VSIG8,RGS7,CCDC121,DUSP10,KCTD3,PROX1,ANGEL2,DTL,ANKRD16,CARLR,PIP4K2A,ARMC3,MSRB2,4921504E06RIK,OTUD1,ETL4,GPR158,KCNT1,ACVR2A,KCNJ3,KCNH7,CERS6,LRP2,MTX2,N…
TF	Factor: E2F-4; motif: NTTTCSCGCC	TF:M07380	3.41015e-11	10.4672	10590	1462	849	21833	PCMTD1,EYA1,DEFB41,FAM135A,TMEFF2,HECW2,PGAP1,ANKRD44,COQ10B,BOLL,SATB2,UNC80,ATIC,TNS1,VIL1,USP37,ZFP142,EPHA4,DNER,CAB39,SPP2,DPP10,SLC41A1,MDM4,HMCN1,EDEM3,1700025G04RIK,RGS7,CCDC121,DUSP10,KCTD3,PROX1,RPS6KC1,ANGEL2,DTL,LAMB3,PIP4K2A,MSRB2,OTUD1,GPR158,MYO3A,ACVR2A,KCNJ3,CERS6,MTX2,NFE2L2,TTC30A1,OSBPL6,UBE2E3,ITGA4,CERKL,NEUROD1,DNAJC10,FRZB,NUP35,ZFP804A,HSD17B12,D430041D05RIK,RASGRP1,SPG11…
TF	Factor: BEN; motif: CAGCGRNV; match class: 1	TF:M01240_1	8.30895e-11	10.0805	12021	1462	941	21833	OPRK1,PCMTD1,EYA1,OGFRL1,FAM135A,TMEFF2,HECW2,PGAP1,ANKRD44,SF3B1,COQ10B,MOB4,RFTN2,BOLL,PLCL1,HSFY2,SATB2,TYW5,CPS1,ERBB4,ATIC,IGFBP5,TNS1,ARPC2,USP37,ZFP142,DNAJB2,SLC4A3,EPHA4,DNER,SPP2,DPP10,MDM4,BRINP3,PLA2G4A,HMCN1,EDEM3,1700025G04RIK,VSIG8,RGS7,DUSP10,KCTD3,PROX1,RPS6KC1,ANGEL2,DTL,ANKRD16,PIP4K2A,MSRB2,OTUD1,MYO3A,ACVR2A,KCNJ3,KCNH7,CERS6,LRP2,MTX2,NFE2L2,TTC30A1,OSBPL6,UBE2E3,PDE1A,DNAJC…
TF	Factor: WT1; motif: CGCCCCCNCN	TF:M02036	8.51552e-11	10.0698	7539	1462	638	21833	OPRK1,JPH1,OGFRL1,FAM135A,TMEFF2,STK17B,HECW2,PGAP1,SF3B1,MOB4,BOLL,PLCL1,UNC80,IGFBP5,USP37,ZFP142,DNAJB2,SLC4A3,EPHA4,DNER,SPP2,DPP10,SLC41A1,BRINP3,HMCN1,EDEM3,1700025G04RIK,OLFR16,DUSP10,PROX1,RPS6KC1,ANKRD16,PIP4K2A,KCNT1,ACVR2A,KCNH7,CERS6,LRP2,MTX2,NFE2L2,OSBPL6,UBE2E3,CERKL,PDE1A,D430041D05RIK,JAG1,BTBD3,MACROD2,SRC,DHX35,PREX1,GNAS,ATP5E,MRPS28,RALYL,YTHDF3,FAT4,HSPA4L,TIPARP,LRBA,PMVK,U…
TF	Factor: SP1:SP3; motif: CCSCCCCCYCC	TF:M01219	1.9843e-10	9.70239	6707	1462	577	21833	JPH1,FAM135A,TMEFF2,STK17B,MOB4,BOLL,PLCL1,SATB2,UNC80,CPS1,ERBB4,TNS1,ARPC2,USP37,ZFP142,DNAJB2,SLC4A3,EPHA4,DNER,SPP2,DPP10,MDM4,BRINP3,1700025G04RIK,ASTN1,OLFR16,RGS7,DUSP10,PROX1,RPS6KC1,LAMB3,ANKRD16,MSRB2,ETL4,GPR158,KCNT1,ACVR2A,KCNH7,CERS6,LRP2,NFE2L2,OSBPL6,UBE2E3,ITGA4,NEUROD1,FRZB,ZFP804A,RASGRP1,JAG1,BTBD3,MACROD2,SRC,DHX35,GNAS,ATP5E,ZFP831,EEF1A2,RALYL,YTHDF3,CYPT12,CYP7B1,HSPA4L,MA…
TF	Factor: Kaiso; motif: GCMGGGRGCRGS	TF:M03876	2.09074e-10	9.6797	11154	1462	882	21833	EYA1,JPH1,OGFRL1,FAM135A,TMEFF2,HECW2,ANKRD44,SF3B1,COQ10B,MOB4,BOLL,PLCL1,SATB2,CRYGF,UNC80,ERBB4,IGFBP5,TNS1,ARPC2,VIL1,USP37,ZFP142,DNAJB2,SLC4A3,EPHA4,DNER,CAB39,SPP2,DPP10,SLC41A1,MDM4,HMCN1,EDEM3,1700025G04RIK,SEC16B,ASTN1,VSIG8,RGS7,DUSP10,KCTD3,PROX1,ANGEL2,LAMB3,ANKRD16,CARLR,PIP4K2A,ARMC3,GPR158,KCNT1,ACVR2A,KCNH7,CERS6,LRP2,MTX2,NFE2L2,OSBPL6,UBE2E3,CERKL,NEUROD1,PDE1A,DNAJC10,FRZB,ZFP…
TF	Factor: E2F-1; motif: GNGGGCGGGRMN; match class: 1	TF:M10209_1	2.73192e-10	9.56353	10651	1462	848	21833	OPRK1,JPH1,OGFRL1,FAM135A,TMEFF2,STK17B,HECW2,ANKRD44,SF3B1,MOB4,BOLL,PLCL1,SATB2,UNC80,ERBB4,ATIC,IGFBP5,TNS1,VIL1,USP37,ZFP142,DNAJB2,SLC4A3,EPHA4,DNER,CAB39,DPP10,SLC41A1,1700025G04RIK,CCDC121,DUSP10,KCTD3,PROX1,RPS6KC1,ANGEL2,DTL,ANKRD16,CARLR,PIP4K2A,4921504E06RIK,OTUD1,GPR158,MYO3A,KCNT1,ACVR2A,KCNJ3,KCNH7,LRP2,NFE2L2,TTC30A1,OSBPL6,UBE2E3,ITGA4,NEUROD1,DNAJC10,ZFP804A,HSD17B12,D430041D05RI…
TF	Factor: Sp1; motif: GGNGGGGGNGGGGGMGGGGCNGGG; match class: 1	TF:M10375_1	2.47454e-09	8.60651	7415	1462	621	21833	JPH1,OGFRL1,FAM135A,4931408C20RIK,TMEFF2,STK17B,HECW2,PGAP1,ANKRD44,MOB4,BOLL,PLCL1,SATB2,IGFBP5,TNS1,ARPC2,VIL1,USP37,DNAJB2,SLC4A3,EPHA4,DNER,DPP10,SLC41A1,MDM4,1700025G04RIK,SEC16B,ASTN1,DUSP10,PROX1,ANGEL2,LAMB3,ANKRD16,PIP4K2A,MSRB2,4921504E06RIK,OTUD1,GPR158,KCNT1,ACVR2A,KCNH7,MTX2,NFE2L2,OSBPL6,UBE2E3,ITGA4,PDE1A,ZFP804A,TFPI,HSD17B12,MACROD2,DHX35,PREX1,DOK5,GNAS,CTSZ,EDN3,ZFHX4,RALYL,YTH…
TF	Factor: E2F-7; motif: GRGGCGGGAANNN	TF:M10212	2.90993e-09	8.53612	8122	1462	670	21833	PCMTD1,DEFB41,OGFRL1,FAM135A,TMEFF2,STK17B,HECW2,ANKRD44,COQ10B,BOLL,PLCL1,SATB2,ATIC,IGFBP5,USP37,ZFP142,DNAJB2,SLC4A3,EPHA4,CAB39,DPP10,MDM4,EDEM3,CCDC121,DUSP10,KCTD3,PROX1,RPS6KC1,ANGEL2,DTL,PIP4K2A,MSRB2,OTUD1,GPR158,MYO3A,ACVR2A,KCNJ3,KCNH7,NFE2L2,OSBPL6,UBE2E3,ITGA4,NEUROD1,FRZB,ZFP804A,D430041D05RIK,JAG1,BTBD3,MACROD2,MANBAL,PREX1,ATP5E,EDN3,ZFP931,MRPS28,YTHDF3,ARMC1,BBS7,HSPA4L,MAML3,TI…
TF	Factor: BTEB3; motif: BNRNGGGAGGNGT	TF:M01865	3.0334e-09	8.51807	8950	1462	727	21833	FAM135A,TMEFF2,OSGEPL1,HECW2,MOB4,RFTN2,BOLL,SATB2,CRYGF,UNC80,IGFBP5,TNS1,CXCR2,CXCR1,USP37,ZFP142,SLC4A3,SPP2,SLC41A1,MDM4,CRB1,1700025G04RIK,SEC16B,ASTN1,VSIG8,OLFR16,RGS7,DUSP10,KCTD3,PROX1,DTL,ARMC3,MSRB2,KCNT1,KCNH7,CERS6,LRP2,MTX2,NFE2L2,OSBPL6,UBE2E3,ITGA4,CERKL,NEUROD1,FRZB,ZFP804A,D430041D05RIK,RASGRP1,SPG11,JAG1,MACROD2,SRC,DHX35,GNAS,ATP5E,ZFP931,EEF1A2,ZFHX4,YTHDF3,CYP7B1,DNAJC5B,BBS…
TF	Factor: Egr-1; motif: NNGCGKGGGCGGGG	TF:M10213	3.09197e-09	8.50976	4416	1462	403	21833	OGFRL1,TMEFF2,STK17B,HECW2,ANKRD44,SF3B1,BOLL,PLCL1,SATB2,UNC80,CPS1,TNS1,USP37,ZFP142,DNAJB2,SLC4A3,DPP10,ASTN1,OLFR16,DUSP10,KCTD3,4921504E06RIK,KCNT1,KCNH7,NFE2L2,UBE2E3,NEUROD1,ZFP804A,BTBD3,MACROD2,SRC,PREX1,EEF1A2,YTHDF3,UBAP2L,CHTOP,CGN,SETDB1,ENSA,PRPF3,RNF115,BCL9,ATP1A1,PLPPR5,PTBP2,UGT8A,LMO4,RNF38,BNC2,SGIP1,SSBP3,OSBPL9,NCDN,CSMD2,PHC2,ZFP362,TMEM39B,CDK6,CFAP69,DMTF1,HADHB,LIMCH1,TE…
TF	Factor: Egr-1; motif: GCGGGGGCGG	TF:M07354	4.06466e-09	8.39098	6112	1462	527	21833	OPRK1,OGFRL1,FAM135A,TMEFF2,STK17B,PGAP1,MOB4,BOLL,PLCL1,UNC80,IGFBP5,USP37,ZFP142,DNAJB2,EPHA4,DNER,CAB39,DPP10,SLC41A1,BRINP3,HMCN1,DUSP10,PROX1,RPS6KC1,ANGEL2,ANKRD16,PIP4K2A,OTUD1,KCNT1,ACVR2A,CERS6,MTX2,NFE2L2,OSBPL6,UBE2E3,NEUROD1,PDE1A,ZFP804A,JAG1,BTBD3,MACROD2,SRC,PREX1,GNAS,RALYL,YTHDF3,HSPA4L,TIPARP,LRBA,PMVK,UBE2Q1,UBAP2L,CHTOP,SETDB1,ENSA,PRPF3,ANP32E,OTUD7B,RNF115,BCL9,IGSF3,ATP1A1,…
TF	Factor: KROX; motif: CCCGCCCCCRCCCC	TF:M00982	5.56841e-09	8.25427	5998	1462	518	21833	OGFRL1,FAM135A,TMEFF2,STK17B,PGAP1,MOB4,BOLL,PLCL1,SATB2,UNC80,ERBB4,IGFBP5,USP37,ZFP142,DNAJB2,EPHA4,DNER,DPP10,SLC41A1,1700025G04RIK,SEC16B,OLFR16,DUSP10,PROX1,RPS6KC1,ANKRD16,PIP4K2A,KCNT1,ACVR2A,KCNH7,LRP2,MTX2,NFE2L2,OSBPL6,UBE2E3,PDE1A,FRZB,ZFP804A,BTBD3,MACROD2,SRC,PREX1,GNAS,ATP5E,MRPS28,RALYL,YTHDF3,CYP7B1,HSPA4L,LRBA,PMVK,UBE2Q1,UBAP2L,CHTOP,TUFT1,CGN,PI4KB,PIP5K1A,SETDB1,ENSA,PRPF3,ANP…
TF	Factor: WT1; motif: SMCNCCNSC	TF:M01118	6.46972e-09	8.18911	8123	1462	668	21833	PCMTD1,FAM135A,STK17B,PGAP1,MOB4,RFTN2,BOLL,PLCL1,SATB2,CPS1,ERBB4,IGFBP5,TNS1,VIL1,USP37,DNAJB2,SLC4A3,SPP2,DPP10,MDM4,BRINP3,1700025G04RIK,ASTN1,OLFR16,DUSP10,DTL,LAMB3,ANKRD16,ARMC3,MSRB2,OTUD1,ETL4,KCNT1,ACVR2A,KCNJ3,MTX2,NFE2L2,UBE2E3,ITGA4,NEUROD1,ZFP804A,TFPI,SPG11,SRC,DHX35,DOK5,GNAS,ZFP831,EDN3,ZFHX4,RALYL,YTHDF3,CYPT12,CYP7B1,DNAJC5B,BBS7,HSPA4L,TIPARP,LRBA,PMVK,KCNN3,UBE2Q1,UBAP2L,PGLY…
TF	Factor: CTCF; motif: NAGGGGGCGCNNKNNNN	TF:M08995	2.43338e-08	7.61379	14354	1462	1076	21833	OPRK1,ST18,PCMTD1,JPH1,OGFRL1,FAM135A,TMEFF2,STK17B,HECW2,PGAP1,ANKRD44,SF3B1,MOB4,RFTN2,BOLL,PLCL1,SATB2,TYW5,CRYGF,UNC80,CPS1,ERBB4,IGFBP5,TNS1,CXCR1,ARPC2,VIL1,USP37,ZFP142,DNAJB2,SLC4A3,EPHA4,DNER,CAB39,SPP2,DPP10,SLC41A1,MDM4,BRINP3,HMCN1,EDEM3,1700025G04RIK,SEC16B,ASTN1,VSIG8,OLFR16,RGS7,DUSP10,PROX1,RPS6KC1,ANGEL2,DTL,LAMB3,ANKRD16,CARLR,PIP4K2A,ARMC3,MSRB2,OTUD1,ETL4,GPR158,KCNT1,ACVR2A,K…
TF	Factor: E2F-1; motif: TTGGCGCGRAANNGNM	TF:M00938	2.45775e-08	7.60946	5237	1462	459	21833	EYA1,JPH1,OGFRL1,4931408C20RIK,TMEFF2,STK17B,ANKRD44,PLCL1,SATB2,ERBB4,ATIC,DNAJB2,SLC4A3,DNER,PLA2G4A,1700025G04RIK,ASTN1,RGS7,DUSP10,PROX1,DTL,CARLR,MSRB2,GPR158,MYO3A,KCNT1,ACVR2A,LRP2,MTX2,OSBPL6,UBE2E3,NEUROD1,DNAJC10,ZFP804A,HSD17B12,D430041D05RIK,RASGRP1,SPG11,JAG1,BTBD3,DHX35,PREX1,DOK5,GNAS,CTSZ,EEF1A2,TIPARP,LRBA,UBAP2L,TUFT1,CGN,SETDB1,ENSA,PRPF3,ANP32E,OTUD7B,BCL9,NOTCH2,IGSF3,PLPPR5,…
TF	Factor: IRF6; motif: NNNACTCYCGGKNNN	TF:M02874	2.46992e-08	7.60732	13421	1462	1017	21833	OPRK1,PCMTD1,EYA1,JPH1,OGFRL1,FAM135A,TMEFF2,STK17B,PGAP1,ANKRD44,SF3B1,COQ10B,MOB4,BOLL,PLCL1,SATB2,TYW5,UNC80,ERBB4,ATIC,IGFBP5,TNS1,CXCR2,ARPC2,USP37,ZFP142,DNAJB2,EPHA4,DNER,SPP2,DPP10,SLC41A1,BRINP3,HMCN1,1700025G04RIK,SEC16B,ASTN1,VSIG8,RGS7,CCDC121,PROX1,DTL,LAMB3,ANKRD16,CARLR,PIP4K2A,ARMC3,MSRB2,4921504E06RIK,OTUD1,ETL4,GPR158,ACVR2A,KCNJ3,KCNH7,XIRP2,LRP2,NFE2L2,TTC30A1,OSBPL6,UBE2E3,CE…
TF	Factor: E2F-1; motif: NNNSSCGCSAANN	TF:M07250	3.18745e-08	7.49656	9056	1462	728	21833	SNTG1,JPH1,DEFB41,FAM135A,TMEFF2,HECW2,PGAP1,ANKRD44,SF3B1,COQ10B,MOB4,BOLL,PLCL1,SATB2,ERBB4,ATIC,TNS1,ARPC2,USP37,ZFP142,EPHA4,DNER,CAB39,DPP10,PLA2G4A,EDEM3,1700025G04RIK,ASTN1,RGS7,CCDC121,DUSP10,PROX1,RPS6KC1,ANGEL2,DTL,ANKRD16,CARLR,PIP4K2A,MSRB2,4921504E06RIK,OTUD1,KCNT1,ACVR2A,KCNH7,NFE2L2,TTC30A1,UBE2E3,PDE1A,DNAJC10,FRZB,HSD17B12,D430041D05RIK,SPG11,JAG1,MACROD2,DHX35,PREX1,DOK5,GNAS,CT…
TF	Factor: GKLF; motif: NNRRGRRNGNSNNN; match class: 1	TF:M07040_1	5.0496e-08	7.29674	8477	1462	687	21833	JPH1,OGFRL1,FAM135A,TMEFF2,STK17B,PGAP1,ANKRD44,MOB4,RFTN2,BOLL,SATB2,UNC80,ERBB4,IGFBP5,TNS1,CXCR1,VIL1,ZFP142,DNAJB2,SLC4A3,SPP2,DPP10,SLC41A1,MDM4,CRB1,1700025G04RIK,SEC16B,ASTN1,VSIG8,OLFR16,DUSP10,PROX1,ANGEL2,LAMB3,ANKRD16,PIP4K2A,MSRB2,ETL4,CERS6,NFE2L2,OSBPL6,UBE2E3,ITGA4,NEUROD1,FRZB,TFPI,HSD17B12,D430041D05RIK,RASGRP1,SPG11,JAG1,BTBD3,MACROD2,SRC,DHX35,GNAS,ZFP831,CDH26,EEF1A2,ZFHX4,RAL…
TF	Factor: RNF96; motif: BCCCGCRGCC; match class: 1	TF:M01199_1	6.70416e-08	7.17366	2732	1462	267	21833	OGFRL1,TMEFF2,HECW2,BOLL,PLCL1,UNC80,ERBB4,SLC4A3,MDM4,1700025G04RIK,DUSP10,ANGEL2,OTUD1,ACVR2A,UBE2E3,ZFP804A,MACROD2,GNAS,HSPA4L,PI4KB,ANP32E,BCL9,NOTCH2,TBX15,PLPPR5,PTBP2,WWP1,RNF38,ASTN2,CCDC171,BNC2,SSBP3,NCDN,CSMD2,ZFP362,PTP4A2,AKAP9,FZD1,WDR86,HADHB,FRYL,TMEM175,SLC15A4,FZD10,MDFIC,CAPZA2,CADPS2,CCSER1,FOXI3,MAGI1,LRIG1,PDZRN3,EDEM1,PRMT8,ETV6,PLEKHA5,CCDC91,ADAMTS17,TEAD1,XPO6,GLRX3,TCE…
TF	Factor: Zfp536; motif: NCGGAKG	TF:M05541	7.79892e-08	7.10797	6342	1462	536	21833	PCMTD1,JPH1,OGFRL1,TMEFF2,STK17B,PGAP1,ANKRD44,MOB4,RFTN2,PLCL1,SATB2,TYW5,UNC80,ERBB4,ATIC,SLC4A3,EPHA4,SPP2,DPP10,MDM4,HMCN1,1700025G04RIK,RGS7,DUSP10,RPS6KC1,ANGEL2,4921504E06RIK,OTUD1,GPR158,ACVR2A,KCNJ3,KCNH7,CERS6,NFE2L2,OSBPL6,UBE2E3,ITGA4,CERKL,FRZB,NUP35,ZFP804A,TFPI,SPG11,JAG1,BTBD3,MACROD2,SRC,DHX35,GNAS,EEF1A2,ZFHX4,RALYL,YTHDF3,HSPA4L,LRBA,PMVK,KCNN3,UBE2Q1,UBAP2L,CHTOP,PI4KB,ARNT,EN…
TF	Factor: FKLF; motif: BGGGNGGVMD	TF:M01837	1.47536e-07	6.8311	4984	1462	436	21833	JPH1,OGFRL1,FAM135A,HECW2,PGAP1,BOLL,SATB2,UNC80,CPS1,ERBB4,IGFBP5,TNS1,USP37,DNAJB2,SLC4A3,EPHA4,DPP10,CRB1,BRINP3,HMCN1,1700025G04RIK,ASTN1,PROX1,ANGEL2,DTL,LAMB3,MSRB2,OTUD1,LRP2,UBE2E3,ITGA4,CERKL,FRZB,HSD17B12,D430041D05RIK,SPG11,JAG1,GNAS,RALYL,CYPT12,DNAJC5B,HSPA4L,TIPARP,LRBA,PMVK,KCNN3,UBAP2L,SPRR2B,PI4KB,PIP5K1A,SETDB1,ARNT,ENSA,ANP32E,SF3B4,RNF115,CD160,BCL9,HAO2,IGSF3,ATP1A1,SNX7,DPYD…
TF	Factor: Foxn1; motif: RGAMGC	TF:M12470	1.52945e-07	6.81546	9738	1462	770	21833	PCMTD1,JPH1,OGFRL1,FAM135A,TMEFF2,STK17B,HECW2,ANKRD44,SF3B1,BOLL,PLCL1,SATB2,UNC80,ERBB4,CXCR1,ARPC2,USP37,DNAJB2,SLC4A3,DNER,CAB39,DPP10,SLC41A1,HMCN1,1700025G04RIK,SEC16B,VSIG8,RGS7,DUSP10,KCTD3,PROX1,RPS6KC1,ANGEL2,DTL,ANKRD16,PIP4K2A,MSRB2,4921504E06RIK,OTUD1,MYO3A,KCNT1,ACVR2A,KCNJ3,KCNH7,CERS6,LRP2,NFE2L2,OSBPL6,UBE2E3,ITGA4,NEUROD1,PDE1A,DNAJC10,FRZB,JAG1,BTBD3,MACROD2,PREX1,DOK5,GNAS,CTS…
TF	Factor: E2F-4; motif: GNNGGCGGGAAN	TF:M09682	1.7757e-07	6.75063	5940	1462	505	21833	PCMTD1,FAM135A,ANKRD44,COQ10B,MOB4,BOLL,ATIC,USP37,ZFP142,EPHA4,CAB39,MDM4,CCDC121,DUSP10,PROX1,RPS6KC1,DTL,PIP4K2A,MSRB2,GPR158,ACVR2A,KCNJ3,UBE2E3,ITGA4,NEUROD1,ZFP804A,D430041D05RIK,BTBD3,MANBAL,PREX1,MRPS28,YTHDF3,HSPA4L,MAML3,TIPARP,LRBA,PMVK,UBE2Q1,TUFT1,CGN,PI4KB,SETDB1,PRPF3,ANP32E,OTUD7B,SF3B4,GJA5,BCL9,SEC22B,TTF2,IGSF3,ATP1A1,COL11A1,SNX7,DPYD,PTBP2,LMO4,RNF38,RGS3,CCDC171,SH3GL2,TUSC1…
TF	Factor: BCL6B; motif: NNNNCCGCCCCWNNNN; match class: 1	TF:M02844_1	2.09685e-07	6.67843	8549	1462	688	21833	JPH1,OGFRL1,FAM135A,TMEFF2,STK17B,PGAP1,COQ10B,MOB4,BOLL,PLCL1,SATB2,UNC80,ERBB4,ATIC,IGFBP5,TNS1,CXCR1,ARPC2,USP37,ZFP142,DNAJB2,SLC4A3,EPHA4,DPP10,SLC41A1,MDM4,CRB1,BRINP3,1700025G04RIK,SEC16B,DUSP10,PROX1,RPS6KC1,ANGEL2,LAMB3,CARLR,PIP4K2A,ARMC3,4921504E06RIK,OTUD1,GPR158,MYO3A,KCNT1,ACVR2A,KCNJ3,KCNH7,LRP2,MTX2,NFE2L2,UBE2E3,ITGA4,NEUROD1,PDE1A,DNAJC10,FRZB,D430041D05RIK,RASGRP1,JAG1,BTBD3,MA…
TF	Factor: GKLF; motif: NNRRGRRNGNSNNN	TF:M07040	3.5538e-07	6.44931	12970	1462	981	21833	JPH1,OGFRL1,FAM135A,TMEFF2,STK17B,PGAP1,ANKRD44,COQ10B,MOB4,RFTN2,BOLL,SATB2,TYW5,UNC80,CPS1,ERBB4,ATIC,IGFBP5,TNS1,CXCR2,CXCR1,VIL1,ZFP142,DNAJB2,SLC4A3,CAB39,SPP2,DPP10,SLC41A1,MDM4,CRB1,BRINP3,1700025G04RIK,SEC16B,ASTN1,VSIG8,OLFR16,RGS7,DUSP10,KCTD3,PROX1,RPS6KC1,ANGEL2,LAMB3,ANKRD16,PIP4K2A,ARMC3,MSRB2,OTUD1,ETL4,ACVR2A,KCNJ3,KCNH7,XIRP2,CERS6,LRP2,MTX2,NFE2L2,OSBPL6,UBE2E3,ITGA4,CERKL,NEURO…
TF	Factor: E2F-4; motif: GCGGGAAANA; match class: 1	TF:M02090_1	4.60612e-07	6.33666	4724	1462	414	21833	FAM135A,ANKRD44,PLCL1,SATB2,ERBB4,TNS1,USP37,DNAJB2,EPHA4,SLC41A1,1700025G04RIK,RGS7,CCDC121,DUSP10,PROX1,ANGEL2,DTL,PIP4K2A,ACVR2A,KCNJ3,CERS6,LRP2,OSBPL6,UBE2E3,NEUROD1,FRZB,JAG1,MACROD2,MANBAL,PREX1,GNAS,EDN3,MAML3,TIPARP,PMVK,KCNN3,UBE2Q1,UBAP2L,TUFT1,CGN,PI4KB,SETDB1,ARNT,PRPF3,GJA5,BCL9,PDE4DIP,NOTCH2,WARS2,TBX15,IGSF3,ATP1A1,COL11A1,PTBP2,ANK2,WWP1,ORC3,RNF38,BNC2,SH3GL2,TUSC1,SGIP1,SSBP3,…
TF	Factor: Zic1; motif: NNCCCCCGGGGGGG	TF:M02835	6.01344e-07	6.22088	9545	1462	753	21833	JPH1,OGFRL1,FAM135A,TMEFF2,HECW2,ANKRD44,SF3B1,BOLL,PLCL1,TYW5,UNC80,ERBB4,ATIC,IGFBP5,TNS1,CXCR2,ARPC2,ZFP142,DNAJB2,SLC4A3,EPHA4,CAB39,DPP10,SLC41A1,MDM4,HMCN1,1700025G04RIK,VSIG8,RGS7,DUSP10,RPS6KC1,ANGEL2,DTL,LAMB3,ANKRD16,PIP4K2A,ETL4,GPR158,MYO3A,ACVR2A,KCNJ3,KCNH7,NFE2L2,OSBPL6,UBE2E3,ITGA4,CERKL,FRZB,ZFP804A,HSD17B12,RASGRP1,JAG1,SRC,DHX35,PREX1,DOK5,GNAS,NELFCD,CTSZ,ATP5E,ZFP831,EDN3,ZFP…
TF	Factor: Pax-4; motif: NNNNNYCACCCB; match class: 1	TF:M00378_1	6.32333e-07	6.19905	14471	1462	1075	21833	OPRK1,ST18,PCMTD1,SNTG1,JPH1,FAM135A,STK17B,HECW2,PGAP1,ANKRD44,COQ10B,MOB4,BOLL,PLCL1,SATB2,UNC80,ERBB4,IGFBP5,TNS1,CXCR2,CXCR1,ARPC2,VIL1,USP37,SLC4A3,EPHA4,DNER,SPP2,DPP10,SLC41A1,MDM4,CRB1,BRINP3,HMCN1,EDEM3,1700025G04RIK,SEC16B,VSIG8,OLFR16,RGS7,CEP170,DUSP10,KCTD3,PROX1,RPS6KC1,ANGEL2,LAMB3,IL2RA,ANKRD16,MALRD1,CARLR,PIP4K2A,ARMC3,MSRB2,4921504E06RIK,OTUD1,ETL4,GPR158,KCNT1,KCNJ3,KCNH7,CERS…
TF	Factor: SP1:SP3; motif: CCSCCCCCYCC; match class: 1	TF:M01219_1	7.42116e-07	6.12953	3392	1462	313	21833	TMEFF2,STK17B,BOLL,SATB2,UNC80,ERBB4,TNS1,USP37,ZFP142,DNAJB2,EPHA4,DPP10,MDM4,ASTN1,OLFR16,DUSP10,LAMB3,MSRB2,ETL4,GPR158,KCNT1,KCNH7,OSBPL6,UBE2E3,ITGA4,NEUROD1,ZFP804A,BTBD3,SRC,DHX35,GNAS,ZFP831,HSPA4L,MAML3,LRBA,PMVK,UBE2Q1,UBAP2L,TUFT1,PI4KB,SETDB1,OTUD7B,SF3B4,FCGR1,BCL9,PDE4DIP,PLPPR5,LMO4,SH3GL2,AGBL4,CSMD2,ZFP362,TMEM39B,KHDRBS1,CFAP69,DMTF1,SEMA3D,HGF,UBE3C,TMEM175,SLC15A4,CALN1,EXOC4,…
TF	Factor: MAZ; motif: NKGGGAGGGGRGGR	TF:M02023	7.85501e-07	6.10485	7967	1462	644	21833	OPRK1,OGFRL1,FAM135A,STK17B,PGAP1,COQ10B,MOB4,BOLL,SATB2,UNC80,CPS1,ERBB4,ATIC,IGFBP5,TNS1,ARPC2,USP37,DNAJB2,SLC4A3,EPHA4,SPP2,DPP10,SLC41A1,MDM4,CRB1,BRINP3,1700025G04RIK,SEC16B,ASTN1,OLFR16,DUSP10,PROX1,ANGEL2,LAMB3,ANKRD16,PIP4K2A,ARMC3,MSRB2,4921504E06RIK,ETL4,ACVR2A,KCNH7,NFE2L2,UBE2E3,ITGA4,NEUROD1,PDE1A,FRZB,ZFP804A,HSD17B12,JAG1,SRC,DHX35,PREX1,GNAS,CTSZ,ZFP831,EDN3,ZFHX4,RALYL,CYPT12,CY…
TF	Factor: Sp1; motif: NGGGGCGGGGN	TF:M07395	8.48569e-07	6.07131	9148	1462	725	21833	OPRK1,JPH1,OGFRL1,FAM135A,STK17B,HECW2,PGAP1,SF3B1,MOB4,BOLL,PLCL1,SATB2,UNC80,CPS1,ERBB4,ATIC,IGFBP5,TNS1,CXCR1,VIL1,USP37,ZFP142,DNAJB2,SLC4A3,EPHA4,DNER,SPP2,DPP10,SLC41A1,BRINP3,1700025G04RIK,OLFR16,DUSP10,KCTD3,PROX1,RPS6KC1,ANGEL2,LAMB3,CARLR,PIP4K2A,4921504E06RIK,OTUD1,MYO3A,KCNT1,ACVR2A,KCNH7,LRP2,NFE2L2,OSBPL6,UBE2E3,ITGA4,NEUROD1,DNAJC10,ZFP804A,HSD17B12,BTBD3,MACROD2,SRC,PREX1,GNAS,CTS…
TF	Factor: AP-2alpha; motif: NGCCYSNNGSN	TF:M01857	9.36859e-07	6.02833	6198	1462	519	21833	JPH1,OGFRL1,FAM135A,OSGEPL1,HECW2,ANKRD44,MOB4,PLCL1,SATB2,UNC80,ERBB4,ATIC,TNS1,ARPC2,ZFP142,DNAJB2,SLC4A3,DNER,DPP10,SLC41A1,MDM4,EDEM3,1700025G04RIK,SEC16B,ASTN1,RGS7,DUSP10,ANKRD16,PIP4K2A,OTUD1,ETL4,KCNH7,LRP2,MTX2,NFE2L2,OSBPL6,UBE2E3,CERKL,DNAJC10,D430041D05RIK,MACROD2,DHX35,PREX1,DOK5,GNAS,CTSZ,ATP5E,CDH26,RALYL,TIPARP,UBE2Q1,SETDB1,PRPF3,OTUD7B,CD160,TBX15,IGSF3,ATP1A1,AGL,PLPPR5,DPYD,PT…
TF	Factor: Egr-1; motif: GCGGGGGCGG	TF:M01873	9.52867e-07	6.02097	5022	1462	434	21833	OGFRL1,FAM135A,TMEFF2,STK17B,MOB4,BOLL,PLCL1,UNC80,USP37,DNAJB2,EPHA4,CAB39,DPP10,SLC41A1,DUSP10,RPS6KC1,ANGEL2,PIP4K2A,OTUD1,KCNT1,ACVR2A,CERS6,NFE2L2,UBE2E3,NEUROD1,ZFP804A,JAG1,BTBD3,MACROD2,SRC,PREX1,GNAS,EDN3,YTHDF3,LRBA,PMVK,UBAP2L,CHTOP,CGN,SETDB1,ENSA,PRPF3,ANP32E,RNF115,BCL9,IGSF3,ATP1A1,AGL,PLPPR5,PTBP2,UGT8A,LMO4,RNF38,ASTN2,BNC2,SH3GL2,TUSC1,SSBP3,NCDN,CSMD2,PHC2,ZFP362,TMEM39B,KHDRBS…
TF	Factor: BCL6B; motif: NNNNCCGCCCCWNNNN	TF:M02844	9.80871e-07	6.00839	13716	1462	1026	21833	ST18,SNTG1,JPH1,OGFRL1,FAM135A,TMEFF2,OSGEPL1,STK17B,PGAP1,ANKRD44,COQ10B,MOB4,BOLL,PLCL1,SATB2,CRYGF,UNC80,CPS1,ERBB4,ATIC,IGFBP5,TNS1,CXCR1,ARPC2,USP37,ZFP142,DNAJB2,SLC4A3,EPHA4,DPP10,SLC41A1,MDM4,CRB1,BRINP3,PLA2G4A,1700025G04RIK,SEC16B,ASTN1,DUSP10,KCTD3,PROX1,RPS6KC1,ANGEL2,DTL,LAMB3,CARLR,PIP4K2A,ARMC3,4921504E06RIK,OTUD1,GPR158,MYO3A,KCNT1,ACVR2A,KCNJ3,KCNH7,CERS6,LRP2,MTX2,NFE2L2,OSBPL6,…
TF	Factor: IRF6; motif: NNNACTCYCGGKNNN; match class: 1	TF:M02874_1	1.0162e-06	5.99302	7147	1462	586	21833	OPRK1,PCMTD1,EYA1,JPH1,OGFRL1,FAM135A,TMEFF2,STK17B,PGAP1,ANKRD44,SF3B1,COQ10B,BOLL,SATB2,TYW5,UNC80,ATIC,TNS1,ARPC2,USP37,ZFP142,DNER,SPP2,1700025G04RIK,SEC16B,VSIG8,RGS7,PROX1,ANKRD16,CARLR,ARMC3,OTUD1,ACVR2A,KCNJ3,KCNH7,NFE2L2,TTC30A1,OSBPL6,UBE2E3,CERKL,NUP35,D430041D05RIK,SPG11,JAG1,MACROD2,MANBAL,SRC,DHX35,GNAS,ZFP831,EEF1A2,RALYL,YTHDF3,FAT4,HSPA4L,TIPARP,LRBA,PMVK,KCNN3,UBE2Q1,CHTOP,LCE1L…
TF	Factor: HIC1; motif: NNNGGKTGCCCSNNNNNN	TF:M01073	1.05619e-06	5.97626	2870	1462	272	21833	OPRK1,OGFRL1,FAM135A,ANKRD44,COQ10B,BOLL,UNC80,DNER,DPP10,BRINP3,1700025G04RIK,RPS6KC1,ACVR2A,CERS6,ITGA4,FRZB,ZFP804A,D430041D05RIK,JAG1,BTBD3,CTSZ,EDN3,CDH26,BBS7,FAT4,TUFT1,PI4KB,PIP5K1A,ANXA9,PRPF3,ANP32E,RNF115,REG4,TTF2,PTBP2,TTLL7,BNC2,TUSC1,SSBP3,CSMD2,ZFP362,CDK6,CFAP69,ZFP804B,HADHB,GABRA2,FRYL,HFM1,PXMP2,TCHP,FZD10,SFSWAP,MMP17,CALN1,CHST12,MDFIC,CCSER1,RAB11FIP5,ALMS1,LMCD1,PRMT8,ETV6…
TF	Factor: Egr-1; motif: GCGGGGGCGG; match class: 1	TF:M07354_1	1.05792e-06	5.97555	2111	1462	212	21833	TMEFF2,STK17B,PGAP1,BOLL,UNC80,USP37,DNAJB2,DUSP10,ANGEL2,PIP4K2A,KCNT1,CERS6,NFE2L2,UBE2E3,BTBD3,PREX1,GNAS,YTHDF3,SETDB1,ENSA,PRPF3,ANP32E,BCL9,ATP1A1,PTBP2,LMO4,ASTN2,BNC2,SH3GL2,TUSC1,SSBP3,CSMD2,CDK6,FZD1,DMTF1,UBE3C,STK32B,TMEM175,MMP17,CAPZA2,CADPS2,CCSER1,MAGI1,GPRC5A,PLEKHA5,PPFIBP1,STX1B,ZFP668,GLRX3,TCERG1L,RBPMS,NR3C2,ZFP423,CADM1,TLE3,TPBG,TBC1D2B,ZBTB2,MAP3K5,MAP7,AHI1,ECHDC1,WASF1,…
TF	Factor: ZBED6; motif: NRRGCTCGCCNN	TF:M01598	1.55318e-06	5.80878	5563	1462	472	21833	EYA1,JPH1,OGFRL1,FAM135A,TMEFF2,STK17B,HECW2,ANKRD44,SF3B1,BOLL,HSFY2,SATB2,TYW5,IGFBP5,ZFP142,DNAJB2,EPHA4,DNER,SLC41A1,PLA2G4A,HMCN1,EDEM3,1700025G04RIK,DUSP10,KCTD3,PROX1,DTL,MSRB2,OTUD1,ETL4,GPR158,ACVR2A,CERS6,TTC30A1,NEUROD1,PDE1A,DNAJC10,FRZB,NUP35,HSD17B12,RASGRP1,SPG11,JAG1,ZFP931,ZFHX4,MRPS28,RALYL,YTHDF3,ARMC1,FAT4,HSPA4L,MAML3,CHTOP,SETDB1,ENSA,ANP32E,OTUD7B,BOLA1,FCGR1,RNF115,SEC22B,…
TF	Factor: E2F-4; motif: GCGGGAAANA	TF:M02090	2.58276e-06	5.58792	10366	1462	804	21833	ST18,SNTG1,DEFB41,OGFRL1,FAM135A,HECW2,ANKRD44,SF3B1,BOLL,PLCL1,SATB2,TYW5,ERBB4,TNS1,CXCR1,VIL1,USP37,ZFP142,DNAJB2,EPHA4,DNER,CAB39,DPP10,SLC41A1,MDM4,EDEM3,1700025G04RIK,RGS7,CCDC121,DUSP10,PROX1,ANGEL2,DTL,CARLR,PIP4K2A,ARMC3,MSRB2,OTUD1,GPR158,ACVR2A,KCNJ3,KCNH7,CERS6,LRP2,NFE2L2,OSBPL6,UBE2E3,CERKL,NEUROD1,PDE1A,DNAJC10,FRZB,ZFP804A,TFPI,D430041D05RIK,RASGRP1,JAG1,BTBD3,MACROD2,MANBAL,PREX1…
TF	Factor: WT1; motif: NNGGGNGGGSGN	TF:M07436	2.72347e-06	5.56488	7746	1462	625	21833	PCMTD1,JPH1,OGFRL1,FAM135A,STK17B,PGAP1,MOB4,RFTN2,BOLL,SATB2,CPS1,ERBB4,IGFBP5,TNS1,ARPC2,DNAJB2,SLC4A3,EPHA4,SPP2,DPP10,SLC41A1,MDM4,BRINP3,HMCN1,1700025G04RIK,ASTN1,VSIG8,OLFR16,DUSP10,PROX1,LAMB3,ANKRD16,CARLR,PIP4K2A,ARMC3,MSRB2,4921504E06RIK,ETL4,KCNT1,ACVR2A,KCNH7,NFE2L2,OSBPL6,UBE2E3,ITGA4,NEUROD1,PDE1A,FRZB,ZFP804A,TFPI,RASGRP1,SPG11,JAG1,MACROD2,SRC,DHX35,GNAS,ZFP831,EEF1A2,ZFHX4,RALYL,…
TF	Factor: Foxn1; motif: RGAMGC; match class: 1	TF:M12470_1	2.81118e-06	5.55111	4367	1462	383	21833	PCMTD1,OGFRL1,FAM135A,STK17B,HECW2,ANKRD44,BOLL,PLCL1,ARPC2,USP37,DNAJB2,CAB39,SLC41A1,HMCN1,DUSP10,RPS6KC1,DTL,KCNT1,CERS6,LRP2,NFE2L2,OSBPL6,UBE2E3,DNAJC10,JAG1,MACROD2,PREX1,EDN3,ZFP931,EEF1A2,MRPS28,FAT4,HSPA4L,MAML3,UBAP2L,CHTOP,PIP5K1A,OTUD7B,RNF115,NOTCH2,TTF2,IGSF3,AGL,PTBP2,UGT8A,LMO4,WWP1,ASTN2,CCDC171,BNC2,SH3GL2,SSBP3,OSBPL9,PHC2,ZFP362,TXLNA,FZD1,HADHB,LIMCH1,FRYL,SRP72,PARM1,TMEM175…
TF	Factor: AP-2; motif: MKCCCSCNGGCG	TF:M00189	2.91595e-06	5.53522	8066	1462	647	21833	OPRK1,PCMTD1,OGFRL1,FAM135A,TMEFF2,STK17B,ANKRD44,SF3B1,COQ10B,BOLL,PLCL1,SATB2,ATIC,IGFBP5,TNS1,ARPC2,ZFP142,DNAJB2,SLC4A3,EPHA4,CAB39,DPP10,SLC41A1,MDM4,1700025G04RIK,VSIG8,RGS7,CCDC121,DUSP10,ANGEL2,DTL,PIP4K2A,OTUD1,MYO3A,ACVR2A,NFE2L2,TTC30A1,OSBPL6,UBE2E3,NEUROD1,DNAJC10,FRZB,ZFP804A,D430041D05RIK,RASGRP1,JAG1,BTBD3,MACROD2,SRC,DOK5,GNAS,CTSZ,ZFP831,EDN3,MRPS28,YTHDF3,CYP7B1,ARMC1,FAT4,HSPA…
TF	Factor: Sp1; motif: NGGGGGCGGGGYN	TF:M00196	3.43516e-06	5.46405	8814	1462	698	21833	OPRK1,JPH1,OGFRL1,FAM135A,STK17B,HECW2,PGAP1,SF3B1,MOB4,BOLL,PLCL1,SATB2,UNC80,CPS1,ERBB4,ATIC,IGFBP5,TNS1,CXCR1,VIL1,USP37,ZFP142,DNAJB2,SLC4A3,EPHA4,DNER,SPP2,DPP10,SLC41A1,BRINP3,1700025G04RIK,OLFR16,DUSP10,KCTD3,PROX1,RPS6KC1,ANGEL2,LAMB3,ANKRD16,CARLR,PIP4K2A,4921504E06RIK,OTUD1,MYO3A,KCNT1,ACVR2A,KCNH7,LRP2,NFE2L2,OSBPL6,UBE2E3,ITGA4,NEUROD1,DNAJC10,ZFP804A,HSD17B12,BTBD3,MACROD2,SRC,PREX1,…
TF	Factor: Egr-2; motif: GCGTGGGCGG; match class: 1	TF:M05494_1	3.86828e-06	5.41248	2804	1462	264	21833	PCMTD1,JPH1,STK17B,ANKRD44,BOLL,USP37,DNER,DPP10,SLC41A1,EDEM3,DUSP10,KCTD3,ANGEL2,OTUD1,KCNT1,CERS6,LRP2,NFE2L2,UBE2E3,NEUROD1,HSD17B12,D430041D05RIK,BTBD3,PREX1,YTHDF3,TIPARP,LRBA,UBAP2L,TUFT1,CGN,ENSA,ANP32E,OTUD7B,BCL9,NOTCH2,PTBP2,LMO4,RNF38,ASTN2,BNC2,TUSC1,SSBP3,ZFP362,TMEM39B,PTP4A2,FZD1,DMTF1,PRKAG2,UBE3C,FRYL,HFM1,MMP17,PSPH,CAPZA2,CADPS2,KLRG2,MRPS33,CCSER1,FOXI3,RMND5A,PPFIBP1,CCDC91,…
TF	Factor: E2F-1; motif: NKTSSCGC	TF:M00428	6.18473e-06	5.20868	7940	1462	636	21833	JPH1,FAM135A,TMEFF2,PGAP1,SF3B1,COQ10B,BOLL,PLCL1,SATB2,TYW5,UNC80,ERBB4,ATIC,ARPC2,USP37,SLC4A3,EPHA4,DNER,CAB39,MDM4,PLA2G4A,HMCN1,EDEM3,1700025G04RIK,RGS7,CCDC121,PROX1,ANGEL2,DTL,MSRB2,OTUD1,GPR158,KCNT1,ACVR2A,KCNH7,CERS6,MTX2,NFE2L2,UBE2E3,NEUROD1,PDE1A,DNAJC10,NUP35,D430041D05RIK,RASGRP1,SPG11,JAG1,MACROD2,PREX1,DOK5,GNAS,NELFCD,ATP5E,EEF1A2,MRPS28,FAT4,SLC7A11,MAML3,KCNN3,UBE2Q1,UBAP2L,TU…
TF	Factor: KROX; motif: CCCGCCCCCRCCCC; match class: 1	TF:M00982_1	6.52458e-06	5.18545	2044	1462	203	21833	TMEFF2,STK17B,BOLL,UNC80,USP37,ZFP142,DNAJB2,EPHA4,DNER,DPP10,SLC41A1,DUSP10,PROX1,KCNT1,ACVR2A,KCNH7,UBE2E3,FRZB,BTBD3,GNAS,PMVK,UBE2Q1,PIP5K1A,SETDB1,BCL9,COL11A1,PLPPR5,LMO4,SH3GL2,SSBP3,CSMD2,KHDRBS1,ZFP804B,DMTF1,STK32B,GABRA2,CAPZA2,CCSER1,RMND5A,PRMT8,GPRC5A,PLEKHA5,PPFIBP1,AKAP13,SETD1A,STX1B,KAT8,GLRX3,TCERG1L,RBPMS,NR3C2,TLE3,TPBG,TBC1D2B,ZBTB2,MAP7,WASF1,CCDC6,BICC1,ATP2B1,PAWR,KIF5A,N…
TF	Factor: MOVO-B; motif: GNGGGGG; match class: 1	TF:M01104_1	6.62196e-06	5.17901	3289	1462	300	21833	FAM135A,HECW2,BOLL,PLCL1,SATB2,TNS1,USP37,DNAJB2,DPP10,SLC41A1,1700025G04RIK,4921504E06RIK,KCNT1,ACVR2A,KCNH7,NFE2L2,OSBPL6,UBE2E3,ZFP804A,DHX35,PREX1,GNAS,CYP7B1,MAML3,LRBA,CGN,BCL9,NOTCH2,AGL,PTBP2,LMO4,TTLL7,RNF38,BNC2,SH3GL2,SGIP1,SSBP3,NCDN,CSMD2,PHC2,ZFP362,PTP4A2,CFAP69,DMTF1,UBE3C,EPHA5,SLC15A4,FZD10,MMP17,CALN1,CAPZA2,ST7,CADPS2,EXOC4,CCSER1,RMND5A,LRRTM4,SHQ1,PRMT8,ETV6,GPRC5A,PLEKHA5,P…
TF	Factor: EGR; motif: CGCCCCCGCNN	TF:M08878	6.82225e-06	5.16607	5843	1462	488	21833	OPRK1,OGFRL1,FAM135A,TMEFF2,STK17B,PGAP1,SF3B1,BOLL,PLCL1,UNC80,IGFBP5,USP37,ZFP142,DNAJB2,SLC4A3,EPHA4,DPP10,BRINP3,HMCN1,DUSP10,PROX1,RPS6KC1,ANKRD16,PIP4K2A,KCNT1,ACVR2A,CERS6,MTX2,NFE2L2,UBE2E3,NEUROD1,PDE1A,DNAJC10,FRZB,JAG1,BTBD3,MACROD2,SRC,PREX1,GNAS,RALYL,YTHDF3,HSPA4L,TIPARP,LRBA,PMVK,UBAP2L,CHTOP,SETDB1,ARNT,ENSA,PRPF3,ANP32E,RNF115,BCL9,ATP1A1,COL11A1,AGL,PLPPR5,PTBP2,UGT8A,ANK2,LMO4,…
TF	Factor: Egr-1; motif: GCGGGGGCGG; match class: 1	TF:M01873_1	1.13899e-05	4.94348	1517	1462	159	21833	TMEFF2,STK17B,BOLL,UNC80,USP37,DNAJB2,ANGEL2,PIP4K2A,KCNT1,CERS6,UBE2E3,BTBD3,YTHDF3,ENSA,ANP32E,BCL9,ATP1A1,PTBP2,LMO4,RNF38,ASTN2,BNC2,SH3GL2,TUSC1,SSBP3,DMTF1,MMP17,CAPZA2,CADPS2,CCSER1,RMND5A,PLEKHA5,PPFIBP1,CCDC91,STX1B,GLRX3,TCERG1L,NR3C2,TPBG,TBC1D2B,ZBTB2,MAP7,WASF1,CCDC6,BICC1,BCR,ATP2B1,PAWR,LGR5,KIF5A,EIF4ENIF1,SHISA6,NOVA1,GALC,ELMO1,DSP,PTDSS1,IRX1,UBE2E2,CSNK1E,PPARA,SLC38A2,FMNL3,S…
TF	Factor: E2F-4; motif: NTTTCSCGCC; match class: 1	TF:M07380_1	1.26991e-05	4.89623	5395	1462	454	21833	FAM135A,TMEFF2,ANKRD44,BOLL,SATB2,TNS1,USP37,ZFP142,DNER,CAB39,DPP10,EDEM3,RGS7,DUSP10,PROX1,DTL,PIP4K2A,MSRB2,GPR158,ACVR2A,MTX2,NFE2L2,OSBPL6,UBE2E3,ITGA4,NEUROD1,FRZB,ZFP804A,JAG1,BTBD3,MACROD2,PREX1,DOK5,GNAS,YTHDF3,HSPA4L,MAML3,TIPARP,LRBA,KCNN3,UBE2Q1,UBAP2L,TUFT1,CGN,SETDB1,ARNT,PRPF3,ANP32E,OTUD7B,BCL9,NOTCH2,TTF2,IGSF3,ATP1A1,COL11A1,DPYD,PTBP2,UGT8A,LMO4,BNC2,SH3GL2,SLC24A2,TUSC1,SSBP3,…
TF	Factor: WT1; motif: NNGGGNGGGSGN; match class: 1	TF:M07436_1	1.44109e-05	4.84131	4020	1462	353	21833	STK17B,BOLL,SATB2,ERBB4,TNS1,DNAJB2,SLC4A3,SPP2,DPP10,SLC41A1,MDM4,BRINP3,1700025G04RIK,ASTN1,VSIG8,OLFR16,LAMB3,PIP4K2A,ARMC3,MSRB2,ETL4,NFE2L2,OSBPL6,UBE2E3,ITGA4,NEUROD1,TFPI,RASGRP1,MACROD2,SRC,DHX35,GNAS,ZFP831,HSPA4L,LRBA,PMVK,KCNN3,UBAP2L,TUFT1,CGN,PI4KB,PIP5K1A,ANXA9,OTUD7B,SF3B4,FCGR1,CD160,BCL9,PDE4DIP,UGT8A,LMO4,SH3GL2,NCDN,CSMD2,ZFP362,TMEM39B,CFAP69,DMTF1,SEMA3D,HGF,UBE3C,CRMP1,STK32…
TF	Factor: GKLF; motif: NNNRGGNGNGGSN; match class: 1	TF:M07289_1	1.5321e-05	4.81471	11003	1462	841	21833	OPRK1,OGFRL1,FAM135A,STK17B,HECW2,PGAP1,ANKRD44,MOB4,RFTN2,BOLL,SATB2,CPS1,ERBB4,IGFBP5,TNS1,ARPC2,VIL1,USP37,ZFP142,DNAJB2,SLC4A3,EPHA4,SPP2,DPP10,SLC41A1,MDM4,CRB1,BRINP3,HMCN1,1700025G04RIK,SEC16B,ASTN1,VSIG8,OLFR16,DUSP10,PROX1,DTL,LAMB3,IL2RA,ANKRD16,PIP4K2A,ARMC3,MSRB2,4921504E06RIK,OTUD1,ETL4,ACVR2A,KCNJ3,KCNH7,CERS6,LRP2,NFE2L2,OSBPL6,UBE2E3,ITGA4,CERKL,NEUROD1,PDE1A,FRZB,ZFP804A,TFPI,RAS…
TF	Factor: Sp1; motif: GGGGCGGGGC	TF:M00931	1.66028e-05	4.77982	8681	1462	684	21833	OPRK1,JPH1,OGFRL1,FAM135A,STK17B,HECW2,PGAP1,SF3B1,MOB4,BOLL,PLCL1,SATB2,UNC80,CPS1,ERBB4,ATIC,IGFBP5,TNS1,CXCR1,ARPC2,VIL1,USP37,ZFP142,DNAJB2,SLC4A3,EPHA4,DNER,SPP2,DPP10,SLC41A1,BRINP3,1700025G04RIK,OLFR16,DUSP10,KCTD3,PROX1,RPS6KC1,ANGEL2,LAMB3,ANKRD16,CARLR,PIP4K2A,4921504E06RIK,OTUD1,MYO3A,KCNT1,ACVR2A,KCNH7,LRP2,NFE2L2,OSBPL6,UBE2E3,ITGA4,NEUROD1,DNAJC10,ZFP804A,HSD17B12,BTBD3,MACROD2,SRC,…
TF	Factor: AP-2alpha; motif: GCCNNNRGS	TF:M00469	1.7159e-05	4.76551	3280	1462	297	21833	JPH1,FAM135A,HECW2,ANKRD44,SF3B1,MOB4,PLCL1,ATIC,ARPC2,SLC4A3,1700025G04RIK,RGS7,ANGEL2,PIP4K2A,KCNT1,LRP2,MTX2,OSBPL6,UBE2E3,JAG1,MACROD2,PREX1,GNAS,CTSZ,CYPT12,TIPARP,UBE2Q1,LCE1H,OTUD7B,BCL9,IGSF3,ATP1A1,DPYD,PTBP2,LMO4,TTLL7,ASTN2,BNC2,SGIP1,PHC2,ZFP362,TXLNA,KHDRBS1,FZD1,ABCF2,PRKAG2,SRP72,PXMP2,COX6A1,TMEM132D,FZD10,SFSWAP,MMP17,PSPH,BAZ1B,KLRG2,PPP1R17,RMND5A,LRIG1,GRM7,SRGAP3,ETV6,PLEKHA5…
TF	Factor: AP2; motif: GCCYGSGGSN	TF:M08867	1.74987e-05	4.75699	7282	1462	587	21833	JPH1,OGFRL1,FAM135A,OSGEPL1,HECW2,PGAP1,ANKRD44,SF3B1,MOB4,BOLL,PLCL1,UNC80,ERBB4,ATIC,IGFBP5,ARPC2,ZFP142,DNAJB2,SLC4A3,DNER,DPP10,MDM4,HMCN1,EDEM3,1700025G04RIK,RGS7,DUSP10,KCTD3,ANGEL2,DTL,ANKRD16,CARLR,PIP4K2A,OTUD1,ETL4,KCNT1,KCNJ3,LRP2,MTX2,OSBPL6,UBE2E3,ITGA4,DNAJC10,FRZB,ZFP804A,TFPI,D430041D05RIK,RASGRP1,JAG1,MACROD2,SRC,PREX1,DOK5,GNAS,CTSZ,EDN3,FAT4,HSPA4L,TIPARP,LRBA,UBE2Q1,LCE1H,PI4K…
TF	Factor: HIC1; motif: NSNNNNTGCCCSSNN	TF:M01072	1.76521e-05	4.7532	2875	1462	266	21833	PCMTD1,JPH1,OGFRL1,FAM135A,HECW2,SF3B1,COQ10B,BOLL,PLCL1,SATB2,TYW5,ERBB4,ARPC2,DNAJB2,SLC4A3,DNER,SLC41A1,OTUD1,ACVR2A,OSBPL6,UBE2E3,FRZB,ZFP804A,SPG11,JAG1,BTBD3,MACROD2,PREX1,GNAS,FAT4,LRBA,CGN,PI4KB,OTUD7B,RNF115,PDE4DIP,ATP1A1,PLPPR5,PTBP2,TTLL7,MMP16,RGS3,BNC2,SH3GL2,TUSC1,SSBP3,CSMD2,ZFP362,TXLNA,PTP4A2,STEAP1,SEMA3D,UBE3C,HADHB,GABRA2,FRYL,HFM1,PXMP2,TCHP,FZD10,SFSWAP,BAZ1B,CHST12,AGK,KRB…
TF	Factor: Plagl1; motif: NNNGGGGSSCCCCNNN; match class: 1	TF:M02786_1	3.47642e-05	4.45887	1800	1462	180	21833	PCMTD1,OSGEPL1,BOLL,SATB2,PROX1,DTL,NFE2L2,CERKL,ZFP804A,RASGRP1,JAG1,BBS7,TIPARP,LRBA,PDE4DIP,NOTCH2,PTBP2,UGT8A,LMO4,MMP16,ASTN2,BNC2,SGIP1,PHC2,ZFP362,KHDRBS1,ANKIB1,STEAP1,PRKAG2,DPP6,LIMCH1,FRYL,PARM1,HFM1,PXMP2,TMEM132D,MMP17,CADPS2,ZC3HAV1,KLRG2,FOXI3,MAGI1,LRIG1,TMEM72,ETV6,PLEKHA5,AKAP13,TMEM135,TEAD1,SBK1,TCERG1L,UNC5D,ZFP423,CNOT1,NTM,CADM1,ICE2,CD109,RASA2,SPSB4,ITGA9,MAP3K5,MAP7,LAMA…
TF	Factor: E2F-4; motif: NGGGGGCGGGRMNN	TF:M10211	3.7694e-05	4.42373	7002	1462	565	21833	OGFRL1,FAM135A,STK17B,MOB4,BOLL,PLCL1,SATB2,UNC80,CPS1,ATIC,USP37,ZFP142,DNAJB2,SLC4A3,EPHA4,DNER,CAB39,SPP2,DPP10,SLC41A1,BRINP3,1700025G04RIK,OLFR16,DUSP10,PROX1,DTL,LAMB3,CARLR,OTUD1,GPR158,KCNT1,ACVR2A,KCNJ3,KCNH7,NFE2L2,OSBPL6,UBE2E3,NEUROD1,D430041D05RIK,BTBD3,MACROD2,MANBAL,SRC,PREX1,ATP5E,EDN3,YTHDF3,CYP7B1,BBS7,HSPA4L,MAML3,TIPARP,LRBA,PMVK,UBE2Q1,UBAP2L,TUFT1,CGN,PI4KB,ANXA9,SETDB1,PRPF…
TF	Factor: AP-2; motif: MKCCCSCNGGCG; match class: 1	TF:M00189_1	3.84411e-05	4.4152	3679	1462	325	21833	OGFRL1,TMEFF2,STK17B,ANKRD44,PLCL1,ZFP142,DNAJB2,SLC4A3,CAB39,1700025G04RIK,DUSP10,ANGEL2,DTL,PIP4K2A,OTUD1,ACVR2A,NFE2L2,OSBPL6,UBE2E3,DNAJC10,MACROD2,SRC,GNAS,CTSZ,YTHDF3,LRBA,UBE2Q1,CHTOP,ANP32E,OTUD7B,BCL9,WARS2,TBX15,AGL,DPYD,PTBP2,ORC3,RNF38,ASTN2,BNC2,SSBP3,CSMD2,PHC2,ZFP362,PTP4A2,CDK6,ANKIB1,FZD1,STEAP1,HADHB,CRMP1,FRYL,PAICS,SRP72,EPHA5,TMEM175,TMEM132D,SFSWAP,MMP17,BAZ1B,CAPZA2,KLRG2,C…
TF	Factor: AP-2beta; motif: GCNNNGGSCNGVGGGN	TF:M01858	3.9423e-05	4.40425	5122	1462	431	21833	JPH1,FAM135A,TMEFF2,HECW2,TYW5,UNC80,ERBB4,TNS1,ARPC2,DNAJB2,EPHA4,DNER,CAB39,DPP10,MDM4,1700025G04RIK,RGS7,ANGEL2,ANKRD16,PIP4K2A,OTUD1,NFE2L2,UBE2E3,CERKL,MACROD2,SRC,DOK5,CTSZ,ATP5E,EDN3,CDH26,HSPA4L,TIPARP,PMVK,UBE2Q1,PIP5K1A,PRPF3,VPS45,OTUD7B,SF3B4,CD160,BCL9,TBX15,AGL,PLPPR5,SNX7,LMO4,ORC3,TUSC1,SSBP3,NCDN,CSMD2,PHC2,ZFP362,TMEM39B,CDK6,ANKIB1,STEAP1,DMTF1,FRYL,EPHA5,TMEM132D,RABGEF1,ST7,K…
TF	Factor: AHR; motif: CACGCN	TF:M01855	5.38076e-05	4.26916	8503	1462	668	21833	ST18,PCMTD1,FAM135A,TMEFF2,OSGEPL1,PGAP1,COQ10B,BOLL,PLCL1,UNC80,ERBB4,IGFBP5,TNS1,CXCR1,ARPC2,USP37,SLC4A3,EPHA4,CAB39,PLA2G4A,EDEM3,1700025G04RIK,SEC16B,CCDC121,KCTD3,RPS6KC1,ANGEL2,ANKRD16,CARLR,ARMC3,ETL4,GPR158,MYO3A,ACVR2A,KCNJ3,CERS6,OSBPL6,UBE2E3,CERKL,NEUROD1,DNAJC10,ZFP804A,TFPI,HSD17B12,JAG1,BTBD3,PREX1,GNAS,ZFP831,ZFP931,EEF1A2,RALYL,YTHDF3,CYP7B1,BBS7,FAT4,HSPA4L,SLC7A11,MAML3,LRBA,P…
TF	Factor: IRF4; motif: NNNAYTCTCGGWNNN	TF:M02872	5.7402e-05	4.24107	14562	1462	1068	21833	OPRK1,PCMTD1,SNTG1,EYA1,JPH1,DEFB41,OGFRL1,FAM135A,TMEFF2,STK17B,HECW2,PGAP1,ANKRD44,SF3B1,COQ10B,MOB4,BOLL,PLCL1,HSFY2,SATB2,TYW5,UNC80,ERBB4,ATIC,IGFBP5,TNS1,CXCR2,ARPC2,USP37,ZFP142,DNAJB2,EPHA4,DNER,SPP2,DPP10,MDM4,BRINP3,EDEM3,1700025G04RIK,SEC16B,ASTN1,VSIG8,OLFR16,RGS7,CCDC121,DUSP10,PROX1,ANGEL2,DTL,LAMB3,ANKRD16,CARLR,PIP4K2A,ARMC3,MSRB2,4921504E06RIK,OTUD1,ETL4,GPR158,ACVR2A,KCNJ3,XIRP2…
TF	Factor: Sp1; motif: NNGGGGCGGGGNN	TF:M00932	6.24391e-05	4.20454	8963	1462	699	21833	OPRK1,JPH1,OGFRL1,FAM135A,STK17B,HECW2,PGAP1,SF3B1,MOB4,BOLL,PLCL1,SATB2,UNC80,CPS1,ERBB4,ATIC,IGFBP5,TNS1,CXCR1,ARPC2,VIL1,USP37,ZFP142,DNAJB2,SLC4A3,EPHA4,DNER,SPP2,DPP10,SLC41A1,BRINP3,1700025G04RIK,OLFR16,DUSP10,KCTD3,PROX1,RPS6KC1,ANGEL2,LAMB3,ANKRD16,CARLR,PIP4K2A,4921504E06RIK,OTUD1,MYO3A,KCNT1,ACVR2A,KCNH7,LRP2,NFE2L2,OSBPL6,UBE2E3,ITGA4,NEUROD1,DNAJC10,ZFP804A,HSD17B12,BTBD3,MACROD2,SRC,…
TF	Factor: ZAC; motif: KGGGCCR	TF:M05547	7.73674e-05	4.11144	6707	1462	542	21833	JPH1,OGFRL1,FAM135A,HECW2,ANKRD44,MOB4,BOLL,PLCL1,TYW5,UNC80,ERBB4,ATIC,IGFBP5,ARPC2,USP37,EPHA4,DNER,MDM4,EDEM3,1700025G04RIK,ASTN1,RGS7,DUSP10,PROX1,DTL,OTUD1,MYO3A,ACVR2A,CERS6,LRP2,NFE2L2,OSBPL6,UBE2E3,ITGA4,CERKL,NEUROD1,DNAJC10,ZFP804A,SPG11,BTBD3,MACROD2,PREX1,GNAS,EEF1A2,CYP7B1,ARMC1,HSPA4L,TIPARP,UBE2Q1,UBAP2L,PRPF3,ANP32E,VPS45,OTUD7B,SF3B4,RNF115,BCL9,NOTCH2,WARS2,IGSF3,ATP1A1,PTBP2,UG…
TF	Factor: AP-2; motif: SNNNCCNCAGGCN	TF:M00915	7.8528e-05	4.10498	7121	1462	571	21833	OGFRL1,FAM135A,TMEFF2,STK17B,HECW2,ANKRD44,SF3B1,COQ10B,PLCL1,UNC80,ERBB4,TNS1,ZFP142,DNAJB2,SLC4A3,DNER,DPP10,MDM4,1700025G04RIK,RGS7,DUSP10,PROX1,ANGEL2,DTL,ANKRD16,OTUD1,KCNT1,ACVR2A,CERS6,NFE2L2,OSBPL6,UBE2E3,ITGA4,CERKL,DNAJC10,FRZB,ZFP804A,HSD17B12,D430041D05RIK,RASGRP1,JAG1,BTBD3,MACROD2,SRC,DHX35,PREX1,DOK5,GNAS,NELFCD,CTSZ,EEF1A2,RALYL,CYP7B1,FAT4,HSPA4L,SLC7A11,TIPARP,LRBA,UBE2Q1,UBAP2L…
TF	Factor: MAZ; motif: NKGGGAGGGGRGGR; match class: 1	TF:M02023_1	8.27934e-05	4.082	4165	1462	359	21833	FAM135A,STK17B,BOLL,SATB2,ERBB4,IGFBP5,TNS1,ARPC2,SLC4A3,DPP10,SLC41A1,MDM4,SEC16B,ASTN1,OLFR16,DUSP10,PROX1,ANGEL2,LAMB3,MSRB2,ETL4,KCNH7,NFE2L2,UBE2E3,ITGA4,NEUROD1,PDE1A,ZFP804A,JAG1,SRC,DHX35,GNAS,ZFP831,EDN3,ZFHX4,CYP7B1,HSPA4L,TIPARP,LRBA,PMVK,UBE2Q1,UBAP2L,PGLYRP4,TUFT1,PI4KB,ARNT,ANP32E,OTUD7B,SF3B4,FCGR1,CD160,BCL9,PDE4DIP,IGSF3,UGT8A,ANK2,RNF38,SH3GL2,5730409E04RIK,CSMD2,ZFP362,PTP4A2,P…
TF	Factor: FPM315; motif: SRGGGAGGAGGN	TF:M01587	9.40977e-05	4.02642	2434	1462	228	21833	JPH1,HECW2,SATB2,TYW5,UNC80,USP37,ZFP142,SLC4A3,SLC41A1,1700025G04RIK,RGS7,PROX1,MSRB2,GPR158,CERS6,LRP2,OSBPL6,SPG11,JAG1,MACROD2,DOK5,GNAS,TIPARP,UBAP2L,PI4KB,ANXA9,OTUD7B,GJA5,NOTCH2,WARS2,IGSF3,ATP1A1,PTBP2,LMO4,SGIP1,5730409E04RIK,NCDN,GJB5,CSMD2,ZFP362,KHDRBS1,CDK6,PEX1,FZD1,CRMP1,EPHA5,HFM1,TMEM175,CALN1,BAZ1B,CHST12,AGK,RMND5A,TRNT1,GRM7,CACNA2D4,NTF3,ISOC2A,SLC1A5,MILL2,PRCP,STX1B,VKORC1…
TF	Factor: E2F-3; motif: GGGCGGGARN	TF:M10210	9.64593e-05	4.01566	2525	1462	235	21833	COQ10B,BOLL,USP37,MDM4,PROX1,RPS6KC1,DTL,PIP4K2A,MSRB2,GPR158,ACVR2A,UBE2E3,ITGA4,NEUROD1,ZFP804A,MRPS28,TIPARP,LRBA,PMVK,UBE2Q1,CGN,PRPF3,ANP32E,OTUD7B,GJA5,BCL9,TTF2,IGSF3,SNX7,DPYD,PTBP2,LMO4,SH3GL2,CSMD2,KHDRBS1,PTP4A2,ZFP804B,PRKAG2,SELENOI,CRMP1,STK32B,LIMCH1,PAICS,HFM1,TMEM175,MMP17,BAZ1B,CAPZA2,CADPS2,AGK,RMND5A,ALMS1,SHQ1,GRM7,PRMT8,GPRC5A,CCDC91,MILL2,LYPD3,ADAMTS17,PRCP,FAM181B,TENM4,S…
TF	Factor: NGFI-C; motif: WTGCGTGGGYGG	TF:M00244	0.000101229	3.9947	5036	1462	422	21833	ST18,PCMTD1,HECW2,ANKRD44,MOB4,BOLL,SATB2,UNC80,ERBB4,ATIC,IGFBP5,TNS1,USP37,ZFP142,DNAJB2,SLC4A3,CAB39,DPP10,SLC41A1,VSIG8,DUSP10,KCTD3,ANGEL2,ETL4,KCNT1,CERS6,LRP2,MTX2,NFE2L2,OSBPL6,UBE2E3,NEUROD1,DNAJC10,ZFP804A,JAG1,BTBD3,MANBAL,PREX1,YTHDF3,UBE2Q1,UBAP2L,CHTOP,TUFT1,SETDB1,ENSA,PRPF3,ANP32E,SF3B4,BCL9,NOTCH2,ATP1A1,COL11A1,OLFM3,PLPPR5,PTBP2,LMO4,MMP16,BNC2,SGIP1,SSBP3,OSBPL9,NCDN,ZFP362,TM…
TF	Factor: AP-2alpha; motif: GCCNNNRGS; match class: 1	TF:M00469_1	0.00010865	3.96397	2030	1462	196	21833	JPH1,FAM135A,HECW2,ANKRD44,SF3B1,MOB4,PLCL1,ATIC,ARPC2,PIP4K2A,LRP2,MTX2,UBE2E3,PREX1,GNAS,CTSZ,UBE2Q1,OTUD7B,BCL9,IGSF3,ATP1A1,PTBP2,LMO4,BNC2,PHC2,ZFP362,TXLNA,KHDRBS1,ABCF2,PRKAG2,PXMP2,COX6A1,TMEM132D,FZD10,MMP17,PSPH,BAZ1B,RMND5A,LRIG1,PLEKHA5,LYPD3,FAM181B,TEAD1,STX1B,DOCK1,TCERG1L,UNC5D,ARHGAP10,ZFP423,ZC3H12C,RASA2,ITGA9,SASH1,NHSL1,PERP,MOXD1,EIF4ENIF1,RTN1,TMED8,TTC7B,VMN1R188,VMN1R212,…
TF	Factor: EGR-1; motif: TGCGTGGGCGK	TF:M01972	0.000131178	3.88214	4169	1462	358	21833	PCMTD1,JPH1,PGAP1,ANKRD44,BOLL,PLCL1,SATB2,UNC80,ERBB4,USP37,DNAJB2,SLC4A3,CAB39,DUSP10,ETL4,KCNT1,CERS6,LRP2,MTX2,NFE2L2,OSBPL6,UBE2E3,NEUROD1,DNAJC10,D430041D05RIK,JAG1,BTBD3,MANBAL,DHX35,PREX1,YTHDF3,TIPARP,UBE2Q1,UBAP2L,CHTOP,TUFT1,SETDB1,ENSA,PRPF3,ANP32E,SF3B4,RNF115,BCL9,ATP1A1,PLPPR5,PTBP2,LMO4,RNF38,SH3GL2,SGIP1,SSBP3,OSBPL9,NCDN,ZFP362,TMEM39B,DMTF1,HADHB,FRYL,HFM1,MMP17,CAPZA2,CADPS2,E…
TF	Factor: BEN; motif: CWGCGAYA	TF:M01241	0.000140674	3.85179	6578	1462	531	21833	PCMTD1,JPH1,FAM135A,TMEFF2,ANKRD44,SF3B1,COQ10B,RFTN2,BOLL,PLCL1,SATB2,TYW5,ERBB4,CXCR2,ARPC2,USP37,ZFP142,DNAJB2,SLC4A3,SLC41A1,ASTN1,DUSP10,KCTD3,PROX1,RPS6KC1,ANGEL2,DTL,LAMB3,CERS6,MTX2,NFE2L2,TTC30A1,OSBPL6,UBE2E3,FRZB,D430041D05RIK,SPG11,JAG1,BTBD3,DHX35,DOK5,GNAS,NELFCD,ZFP831,EDN3,ZFHX4,YTHDF3,ARMC1,FAT4,HSPA4L,MAML3,LRBA,UBAP2L,PIP5K1A,ANXA9,ANP32E,RNF115,TBX15,AGL,PLPPR5,SNX7,PTBP2,LMO4…
TF	Factor: Plagl1; motif: NNNGGGGSSCCCCNNN	TF:M02786	0.000179908	3.74495	2006	1462	193	21833	PCMTD1,OGFRL1,OSGEPL1,BOLL,SATB2,PROX1,DTL,NFE2L2,CERKL,ZFP804A,RASGRP1,JAG1,BBS7,TIPARP,LRBA,PDE4DIP,NOTCH2,PTBP2,UGT8A,LMO4,MMP16,ASTN2,BNC2,SGIP1,PHC2,ZFP362,KHDRBS1,ANKIB1,STEAP1,DMTF1,PRKAG2,DPP6,LIMCH1,FRYL,PARM1,HFM1,PXMP2,TMEM132D,MMP17,CADPS2,ZC3HAV1,KLRG2,FOXI3,RMND5A,MAGI1,LRIG1,TMEM72,ETV6,PLEKHA5,AKAP13,TMEM135,TEAD1,SBK1,TCERG1L,UNC5D,ZFP423,CNOT1,NTM,CADM1,ICE2,CD109,RASA2,SPSB4,IT…
TF	Factor: Sp4; motif: NNNNMCGCCCCCTNNNN	TF:M02810	0.000188091	3.72563	4020	1462	346	21833	OPRK1,OGFRL1,FAM135A,TMEFF2,STK17B,MOB4,SATB2,UNC80,ERBB4,USP37,ZFP142,DNAJB2,EPHA4,DPP10,1700025G04RIK,DUSP10,PROX1,RPS6KC1,LAMB3,ANKRD16,CARLR,ACVR2A,KCNJ3,KCNH7,LRP2,NFE2L2,UBE2E3,NEUROD1,JAG1,DHX35,GNAS,ATP5E,EDN3,MRPS28,CYP7B1,HSPA4L,LRBA,PMVK,UBE2Q1,CHTOP,TUFT1,PI4KB,PIP5K1A,SETDB1,ENSA,VPS45,SF3B4,BCL9,OLFM3,PLPPR5,PTBP2,UGT8A,LMO4,WWP1,SH3GL2,OSBPL9,AGBL4,NCDN,CSMD2,TMEM39B,KHDRBS1,CDK6,P…
TF	Factor: WT1; motif: GNGGGGGCGGGG	TF:M03893	0.000286987	3.54214	6668	1462	535	21833	OPRK1,OGFRL1,FAM135A,TMEFF2,STK17B,SF3B1,MOB4,BOLL,PLCL1,SATB2,UNC80,CPS1,USP37,DNAJB2,EPHA4,DNER,SPP2,DPP10,SLC41A1,BRINP3,EDEM3,1700025G04RIK,OLFR16,DUSP10,KCTD3,RPS6KC1,ANGEL2,LAMB3,ANKRD16,CARLR,PIP4K2A,4921504E06RIK,KCNT1,ACVR2A,KCNH7,LRP2,MTX2,NFE2L2,OSBPL6,UBE2E3,CERKL,NEUROD1,ZFP804A,JAG1,BTBD3,MACROD2,SRC,DHX35,PREX1,GNAS,ATP5E,EDN3,MRPS28,YTHDF3,CYP7B1,BBS7,TIPARP,PMVK,UBE2Q1,UBAP2L,CHT…
TF	Factor: Wt1; motif: NNCCTCCCCCACNN	TF:M12438	0.000354423	3.45048	5984	1462	486	21833	OGFRL1,FAM135A,HECW2,ANKRD44,COQ10B,RFTN2,BOLL,SATB2,CRYGF,IGFBP5,TNS1,CXCR1,VIL1,ZFP142,DNAJB2,SLC4A3,SPP2,SLC41A1,MDM4,1700025G04RIK,ASTN1,VSIG8,DUSP10,KCTD3,PROX1,DTL,ARMC3,MSRB2,4921504E06RIK,KCNT1,ACVR2A,KCNH7,OSBPL6,UBE2E3,NEUROD1,NUP35,ZFP804A,SPG11,SRC,GNAS,EEF1A2,ZFHX4,RALYL,YTHDF3,CYPT12,CYP7B1,DNAJC5B,BBS7,FAT4,HSPA4L,MAML3,LRBA,PMVK,UBE2Q1,PGLYRP4,SPRR2B,LCE1L,TCHHL1,CGN,PI4KB,PIP5K1A…
TF	Factor: EGR-1; motif: NGCGKGGGCGKNN	TF:M08996	0.000399498	3.39849	3995	1462	342	21833	JPH1,STK17B,HECW2,PGAP1,ANKRD44,SF3B1,BOLL,PLCL1,UNC80,USP37,DNAJB2,SLC4A3,DPP10,DUSP10,KCTD3,PIP4K2A,KCNT1,ACVR2A,CERS6,LRP2,MTX2,NFE2L2,UBE2E3,NEUROD1,DNAJC10,FRZB,SPG11,BTBD3,PREX1,GNAS,YTHDF3,LRBA,UBE2Q1,UBAP2L,CHTOP,TUFT1,PIP5K1A,ENSA,PRPF3,ANP32E,SF3B4,RNF115,GJA5,BCL9,ATP1A1,COL11A1,AGL,PLPPR5,PTBP2,LMO4,RNF38,SH3GL2,SGIP1,SSBP3,OSBPL9,NCDN,ZFP362,TMEM39B,PTP4A2,ZFP804B,DMTF1,HADHB,SELENOI…
TF	Factor: Egr-3; motif: NTGCGTGGGCGK	TF:M00245	0.000483632	3.31549	6083	1462	492	21833	PCMTD1,JPH1,PGAP1,ANKRD44,BOLL,PLCL1,SATB2,TYW5,UNC80,ERBB4,IGFBP5,VIL1,USP37,SLC4A3,CAB39,SLC41A1,RGS7,DUSP10,KCTD3,ANGEL2,PIP4K2A,ETL4,KCNT1,CERS6,LRP2,MTX2,OSBPL6,UBE2E3,NEUROD1,DNAJC10,HSD17B12,D430041D05RIK,SPG11,JAG1,BTBD3,MANBAL,DHX35,PREX1,NELFCD,CTSZ,RALYL,YTHDF3,SLC7A11,TIPARP,LRBA,UBE2Q1,UBAP2L,CHTOP,TUFT1,PIP5K1A,SETDB1,ARNT,ENSA,PRPF3,ANP32E,SF3B4,GJA5,BCL9,IGSF3,ATP1A1,PLPPR5,PTBP2,…
TF	Factor: AP-2gamma; motif: GCCYNNGGS	TF:M00470	0.000501068	3.3001	7023	1462	558	21833	OPRK1,JPH1,FAM135A,STK17B,HECW2,PGAP1,ANKRD44,SF3B1,MOB4,BOLL,PLCL1,TYW5,ATIC,IGFBP5,ARPC2,ZFP142,DNAJB2,SLC4A3,CAB39,DPP10,SLC41A1,MDM4,HMCN1,1700025G04RIK,ASTN1,RGS7,ANGEL2,DTL,ANKRD16,PIP4K2A,OTUD1,KCNT1,LRP2,MTX2,NFE2L2,OSBPL6,UBE2E3,PPP1R1C,D430041D05RIK,SPG11,JAG1,MACROD2,SRC,PREX1,DOK5,GNAS,NELFCD,CTSZ,EEF1A2,RALYL,YTHDF3,CYPT12,CYP7B1,ARMC1,BBS7,FAT4,HSPA4L,TIPARP,UBE2Q1,LCE1H,ANXA9,OTUD7…
TF	Factor: ZBP89; motif: CCCCKCCCCCNN	TF:M07397	0.000510725	3.29181	8105	1462	633	21833	OGFRL1,FAM135A,STK17B,MOB4,BOLL,PLCL1,SATB2,UNC80,CPS1,ERBB4,IGFBP5,TNS1,VIL1,USP37,DNAJB2,SLC4A3,EPHA4,DNER,SPP2,DPP10,SLC41A1,MDM4,BRINP3,1700025G04RIK,ASTN1,OLFR16,DUSP10,DTL,LAMB3,CARLR,PIP4K2A,ARMC3,MSRB2,4921504E06RIK,ETL4,KCNT1,ACVR2A,KCNH7,NFE2L2,OSBPL6,UBE2E3,ITGA4,NEUROD1,PDE1A,ZFP804A,TFPI,RASGRP1,SPG11,MACROD2,SRC,DHX35,DOK5,GNAS,ATP5E,ZFP831,EDN3,ZFHX4,YTHDF3,CYP7B1,BBS7,HSPA4L,MAML3…
TF	Factor: BTEB3; motif: BNRNGGGAGGNGT; match class: 1	TF:M01865_1	0.00059165	3.22793	3096	1462	274	21833	FAM135A,BOLL,SATB2,IGFBP5,TNS1,CXCR1,USP37,ZFP142,SLC4A3,SPP2,SLC41A1,MDM4,1700025G04RIK,ASTN1,DUSP10,CERS6,MTX2,OSBPL6,CERKL,ZFP804A,D430041D05RIK,RASGRP1,SPG11,MACROD2,SRC,GNAS,YTHDF3,CYP7B1,TIPARP,LRBA,TCHHL1,PI4KB,PIP5K1A,ARNT,OTUD7B,SF3B4,BCL9,CD2,IGSF3,ATP1A1,OLFM3,LMO4,RASEF,5730409E04RIK,TMEM39B,KHDRBS1,PTP4A2,CDK6,PEX1,FZD1,SEMA3D,PRKAG2,CRMP1,STK32B,HS3ST1,OCIAD2,SRP72,PARM1,FZD10,SFSWA…
TF	Factor: GKLF; motif: NNNRGGNGNGGSN	TF:M07289	0.000611921	3.2133	15327	1462	1109	21833	OPRK1,ST18,PCMTD1,JPH1,OGFRL1,FAM135A,4931408C20RIK,TMEFF2,OSGEPL1,STK17B,HECW2,PGAP1,ANKRD44,SF3B1,COQ10B,MOB4,RFTN2,BOLL,PLCL1,SATB2,CRYGF,CPS1,ERBB4,ATIC,IGFBP5,TNS1,CXCR2,CXCR1,ARPC2,VIL1,USP37,ZFP142,DNAJB2,SLC4A3,EPHA4,SPP2,DPP10,SLC41A1,MDM4,CRB1,BRINP3,HMCN1,1700025G04RIK,SEC16B,ASTN1,VSIG8,OLFR16,DUSP10,KCTD3,PROX1,DTL,LAMB3,IL2RA,ANKRD16,CARLR,PIP4K2A,ARMC3,MSRB2,4921504E06RIK,OTUD1,ETL…
TF	Factor: ZBED6; motif: NRRGCTCGCCNN; match class: 1	TF:M01598_1	0.00062351	3.20516	1366	1462	139	21833	FAM135A,TMEFF2,STK17B,HECW2,ANKRD44,BOLL,DNER,SLC41A1,1700025G04RIK,ACVR2A,CERS6,FRZB,HSD17B12,JAG1,ZFHX4,ARMC1,FAT4,HSPA4L,MAML3,BNC2,SLC24A2,SGIP1,NCDN,ANKIB1,HADHB,FRYL,SLC15A4,SFSWAP,KLRG2,AGK,NOBOX,FOXI3,XPO6,ABHD13,VPS35,N4BP1,SALL1,CNOT1,FAT3,CADM1,TLE3,CGNL1,PLAGL1,MAP3K5,WASF1,CRY1,ATXN7L3B,HMGA2,PPM1H,STXBP6,SIPA1L1,TTC7B,KLF6,PAK1IP1,GPBP1,RARB,UBE2E2,CACNA2D3,TDRD3,SLC38A2,LSAMP,GBE1,…
TF	Factor: WT1; motif: NGCGGGGGGGTSMMCYN	TF:M05599	0.000630977	3.19999	5337	1462	438	21833	JPH1,OGFRL1,FAM135A,STK17B,HECW2,ANKRD44,SF3B1,COQ10B,BOLL,PLCL1,SATB2,UNC80,ERBB4,TNS1,ARPC2,USP37,SPP2,DPP10,BRINP3,1700025G04RIK,OLFR16,RGS7,DTL,LAMB3,PIP4K2A,4921504E06RIK,OTUD1,ETL4,MYO3A,KCNT1,ACVR2A,CERS6,LRP2,OSBPL6,UBE2E3,ITGA4,FRZB,ZFP804A,BTBD3,SRC,PREX1,GNAS,ZFP831,EDN3,MRPS28,YTHDF3,CYP7B1,FAT4,TIPARP,LRBA,PMVK,KCNN3,UBAP2L,TUFT1,ENSA,RNF115,CD160,BCL9,TBX15,SPAG17,COL11A1,SNX7,UGT8A…
TF	Factor: IRF4; motif: NNNAYTCTCGGWNNN; match class: 1	TF:M02872_1	0.000632823	3.19872	8145	1462	635	21833	OPRK1,OGFRL1,FAM135A,TMEFF2,PGAP1,SF3B1,COQ10B,BOLL,PLCL1,SATB2,TYW5,UNC80,ERBB4,ATIC,IGFBP5,TNS1,ARPC2,ZFP142,EPHA4,DNER,SPP2,DPP10,BRINP3,1700025G04RIK,SEC16B,ASTN1,RGS7,PROX1,DTL,ANKRD16,PIP4K2A,MSRB2,OTUD1,ETL4,ACVR2A,NFE2L2,FRZB,NUP35,ZFP804A,RASGRP1,SPG11,JAG1,MACROD2,MANBAL,SRC,DHX35,DOK5,GNAS,EEF1A2,ZFHX4,YTHDF3,ARMC1,HSPA4L,TIPARP,LRBA,PMVK,KCNN3,UBAP2L,LCE1L,CGN,PI4KB,PIP5K1A,ARNT,ENSA,…
TF	Factor: Sp1; motif: CCCCGCCCCN	TF:M00933	0.000724351	3.14005	8779	1462	678	21833	OGFRL1,FAM135A,STK17B,PGAP1,SF3B1,MOB4,BOLL,PLCL1,SATB2,UNC80,CPS1,ERBB4,IGFBP5,TNS1,CXCR1,USP37,DNAJB2,SLC4A3,EPHA4,DNER,SPP2,DPP10,SLC41A1,MDM4,BRINP3,1700025G04RIK,ASTN1,OLFR16,DUSP10,KCTD3,PROX1,ANGEL2,DTL,LAMB3,CARLR,ARMC3,4921504E06RIK,OTUD1,MYO3A,KCNT1,ACVR2A,KCNH7,LRP2,NFE2L2,OSBPL6,UBE2E3,ITGA4,DNAJC10,ZFP804A,HSD17B12,SPG11,BTBD3,MACROD2,SRC,PREX1,DOK5,GNAS,CTSZ,ATP5E,EDN3,YTHDF3,CYP7B1…
TF	Factor: E2F-2; motif: NNNWYGGCGCCAANNNN	TF:M02846	0.000746303	3.12709	1983	1462	188	21833	FAM135A,TMEFF2,TNS1,ARPC2,EPHA4,DNER,EDEM3,RGS7,DTL,NFE2L2,UBE2E3,SPG11,GNAS,EEF1A2,MRPS28,FAT4,TIPARP,UBE2Q1,CHTOP,OTUD7B,NOTCH2,PLPPR5,TTLL7,ORC3,ASTN2,RASEF,BNC2,TUSC1,SSBP3,GJB5,KHDRBS1,MTERF1B,DMTF1,PRKAG2,PARM1,TCHP,BAZ1B,SLC7A1,CFTR,CADPS2,ZFP110,SLC1A5,ETHE1,AKAP13,PRCP,FAM181B,TEAD1,ZFP668,TCERG1L,NR3C2,ARHGAP10,VPS35,SALL1,NTM,ZC3H12C,RASA2,SPSB4,ZBTB2,MTHFD1L,CITED2,OLIG3,EYA4,ADORA2A,…
TF	Factor: Pax-5; motif: RRMSWGANWYCTNRAGCGKRACSRYNSM	TF:M00144	0.000841596	3.0749	12008	1462	894	21833	JPH1,OGFRL1,FAM135A,TMEFF2,OSGEPL1,STK17B,HECW2,PGAP1,ANKRD44,SF3B1,MOB4,BOLL,SATB2,TYW5,UNC80,ERBB4,ATIC,IGFBP5,TNS1,ARPC2,USP37,ZFP142,SLC4A3,DNER,CAB39,DPP10,SLC41A1,MDM4,CRB1,BRINP3,HMCN1,EDEM3,1700025G04RIK,OLFR16,RGS7,DUSP10,KCTD3,RPS6KC1,ANGEL2,DTL,CARLR,PIP4K2A,MSRB2,4921504E06RIK,OTUD1,ETL4,GPR158,KCNT1,OLFR342,KCNH7,CERS6,LRP2,MTX2,TTC30A1,ITGA4,PDE1A,DNAJC10,ZFP804A,TFPI,HSD17B12,D4300…
TF	Factor: Osx; motif: CCNCCCCCNNN	TF:M07329	0.00100025	2.99989	6174	1462	496	21833	OGFRL1,FAM135A,TMEFF2,STK17B,BOLL,PLCL1,SATB2,UNC80,CPS1,IGFBP5,TNS1,CXCR2,CXCR1,VIL1,USP37,DNAJB2,SLC4A3,EPHA4,SLC41A1,MDM4,1700025G04RIK,ASTN1,OLFR16,DUSP10,DTL,CARLR,OTUD1,KCNT1,ACVR2A,KCNJ3,KCNH7,MTX2,NFE2L2,UBE2E3,ZFP804A,TFPI,JAG1,MACROD2,SRC,GNAS,RALYL,YTHDF3,CYP7B1,BBS7,HSPA4L,TIPARP,LRBA,KCNN3,UBE2Q1,UBAP2L,CHTOP,PGLYRP4,TUFT1,ANXA9,SETDB1,ENSA,PRPF3,OTUD7B,SF3B4,FCGR1,RNF115,CD160,BCL9,…
TF	Factor: E2F-3; motif: GGCGGGN; match class: 1	TF:M02089_1	0.00122623	2.91143	6910	1462	547	21833	OPRK1,OGFRL1,FAM135A,STK17B,HECW2,ANKRD44,MOB4,BOLL,PLCL1,SATB2,UNC80,ERBB4,ATIC,TNS1,VIL1,USP37,DNAJB2,SLC4A3,EPHA4,DNER,DPP10,SLC41A1,1700025G04RIK,DUSP10,KCTD3,ANGEL2,PIP4K2A,4921504E06RIK,OTUD1,KCNT1,ACVR2A,KCNH7,LRP2,NFE2L2,OSBPL6,UBE2E3,DNAJC10,ZFP804A,HSD17B12,MACROD2,PREX1,GNAS,CTSZ,ZFP831,EDN3,MRPS28,CYP7B1,FAT4,HSPA4L,TIPARP,LRBA,PMVK,UBAP2L,TUFT1,CGN,SETDB1,PRPF3,ANP32E,OTUD7B,BCL9,WAR…
TF	Factor: AP-2; motif: GSCCSCRGGCNRNRNN	TF:M00800	0.00123195	2.90941	6753	1462	536	21833	PCMTD1,JPH1,OGFRL1,FAM135A,TMEFF2,ANKRD44,BOLL,PLCL1,UNC80,ERBB4,ATIC,IGFBP5,TNS1,ARPC2,DNAJB2,SLC4A3,DPP10,SLC41A1,1700025G04RIK,VSIG8,RPS6KC1,ANGEL2,DTL,ANKRD16,PIP4K2A,OTUD1,CERS6,LRP2,NFE2L2,OSBPL6,ITGA4,D430041D05RIK,RASGRP1,SPG11,BTBD3,MACROD2,DHX35,PREX1,DOK5,GNAS,NELFCD,CTSZ,ZFP931,FAT4,HSPA4L,MAML3,LRBA,UBE2Q1,UBAP2L,TCHHL1,ANXA9,SETDB1,ARNT,OTUD7B,WARS2,TBX15,IGSF3,ATP1A1,PLPPR5,SNX7,PT…
TF	Factor: E2F-1; motif: TTGGCGCGRAANNGNM; match class: 1	TF:M00938_1	0.00139687	2.85484	1497	1462	148	21833	OGFRL1,PLCL1,SATB2,ERBB4,DNER,RGS7,DUSP10,DTL,MTX2,DOK5,UBAP2L,SETDB1,BCL9,PLPPR5,WWP1,BNC2,SSBP3,CSMD2,ZFP362,CDK6,ABCF2,HTR5A,UBE3C,SELENOI,SLC15A4,TMEM132D,ST7,ZC3HAV1,EIF2AK3,NUP210,MAGI1,LRIG1,EDEM1,PLEKHA5,SLC1A5,ADAMTS17,TEAD1,CLN8,RBPMS,ARHGAP10,NHSL1,MAP3K5,MAP7,EYA4,CCDC6,IPMK,CRY1,FBXO7,ATP2B1,HMGA2,NEMP1,SHISA6,RNF157,RNF144A,STXBP6,NOVA1,RALGAPA1,RTN1,SIPA1L1,TMED10,TMED8,FOXN3,KLF6,…
TF	Factor: Egr1; motif: NNMCGCCCMCTCAMWN	TF:M04506	0.00140908	2.85106	4361	1462	365	21833	OPRK1,ST18,PCMTD1,FAM135A,TMEFF2,STK17B,ANKRD44,SF3B1,BOLL,UNC80,ATIC,USP37,DNAJB2,EPHA4,CAB39,DPP10,HMCN1,DUSP10,KCTD3,RPS6KC1,ANKRD16,ACVR2A,CERS6,NEUROD1,TFPI,HSD17B12,SPG11,JAG1,BTBD3,GNAS,RALYL,TIPARP,PMVK,CHTOP,TUFT1,SETDB1,ARNT,ENSA,PRPF3,BCL9,NOTCH2,COL11A1,PTBP2,UGT8A,LMO4,CCDC171,SH3GL2,OSBPL9,NCDN,CSMD2,TMEM39B,KHDRBS1,PTP4A2,CDK6,ANKIB1,ZFP804B,DMTF1,HTR5A,SELENOI,STK32B,TEC,FRYL,PXMP…
TF	Factor: E2F-7; motif: GRGGCGGGAANNN; match class: 1	TF:M10212_1	0.00198811	2.70156	3087	1462	270	21833	OGFRL1,FAM135A,BOLL,ATIC,USP37,ZFP142,DNAJB2,SLC4A3,CAB39,DTL,PIP4K2A,GPR158,ACVR2A,UBE2E3,ITGA4,NEUROD1,ZFP804A,JAG1,BTBD3,PREX1,YTHDF3,MAML3,TIPARP,LRBA,UBE2Q1,TUFT1,CGN,PI4KB,PRPF3,OTUD7B,TTF2,IGSF3,ATP1A1,COL11A1,DPYD,PTBP2,LMO4,SH3GL2,TUSC1,PSMB2,NCDN,CSMD2,ZFP362,TXLNA,KHDRBS1,PTP4A2,WDR86,SELENOI,LIMCH1,FRYL,PAICS,HFM1,COX6A1,FZD10,MMP17,BAZ1B,MDFIC,CAPZA2,CADPS2,AGK,CCSER1,NUP210,FBLN2,LR…
TF	Factor: SP2; motif: GNNGGGGGCGGGGSN	TF:M03807	0.00216146	2.66525	7111	1462	559	21833	OGFRL1,FAM135A,STK17B,HECW2,PGAP1,SF3B1,MOB4,BOLL,PLCL1,SATB2,CPS1,ERBB4,ATIC,IGFBP5,CXCR1,VIL1,USP37,DNAJB2,EPHA4,DNER,SPP2,DPP10,SLC41A1,BRINP3,1700025G04RIK,OLFR16,DUSP10,KCTD3,ANGEL2,LAMB3,CARLR,PIP4K2A,4921504E06RIK,OTUD1,MYO3A,KCNT1,ACVR2A,KCNH7,LRP2,MTX2,NFE2L2,OSBPL6,UBE2E3,DNAJC10,BTBD3,MACROD2,SRC,GNAS,CTSZ,ATP5E,EDN3,YTHDF3,CYP7B1,BBS7,HSPA4L,PMVK,UBAP2L,CHTOP,TUFT1,CGN,PIP5K1A,ANXA9,S…
TF	Factor: Hes1; motif: NNCACGYGNN	TF:M07991	0.00226098	2.6457	15521	1462	1117	21833	ST18,PCMTD1,SNTG1,JPH1,DEFB41,OGFRL1,TMEFF2,STK17B,HECW2,ANKRD44,SF3B1,COQ10B,MOB4,BOLL,PLCL1,HSFY2,SATB2,TYW5,CRYGF,UNC80,ERBB4,ATIC,IGFBP5,TNS1,CXCR2,CXCR1,ARPC2,VIL1,USP37,ZFP142,DNAJB2,SLC4A3,EPHA4,DNER,SPP2,SLC41A1,CRB1,BRINP3,PLA2G4A,HMCN1,EDEM3,1700025G04RIK,ASTN1,VSIG8,RGS7,CCDC121,DUSP10,KCTD3,PROX1,RPS6KC1,ANGEL2,DTL,ANKRD16,MALRD1,PIP4K2A,ARMC3,MSRB2,4921504E06RIK,OTUD1,GPR158,MYO3A,KC…
TF	Factor: AHR; motif: CACGCN; match class: 1	TF:M01855_1	0.00265129	2.57654	2752	1462	244	21833	ST18,PCMTD1,TMEFF2,COQ10B,ERBB4,IGFBP5,TNS1,CXCR1,ARPC2,USP37,SLC4A3,CAB39,PLA2G4A,EDEM3,1700025G04RIK,ANGEL2,ANKRD16,CERS6,OSBPL6,ZFP804A,TFPI,BTBD3,GNAS,RALYL,YTHDF3,CYP7B1,BBS7,UBE2Q1,CGN,SETDB1,PDE4DIP,REG4,PTBP2,ANK2,LMO4,CSMD2,PHC2,ZFP362,CDK6,CFAP69,STEAP1,DMTF1,HTR5A,GABRA2,OCIAD2,HFM1,CHST12,SLC7A1,EXOC4,CCSER1,RAB11FIP5,SLC41A3,SHQ1,PDZRN3,CRBN,GRM7,SRGAP3,SOX5,SERGEF,AGBL1,FAM181B,KAT8…
TF	Factor: Zic1; motif: NNCCCCCGGGGGGG; match class: 1	TF:M02835_1	0.00296681	2.52771	6612	1462	523	21833	JPH1,OGFRL1,FAM135A,TMEFF2,ANKRD44,SF3B1,BOLL,PLCL1,ERBB4,IGFBP5,TNS1,CXCR2,DNAJB2,SLC4A3,EPHA4,CAB39,DPP10,SLC41A1,MDM4,HMCN1,1700025G04RIK,VSIG8,RGS7,RPS6KC1,ANGEL2,DTL,ANKRD16,PIP4K2A,ETL4,ACVR2A,KCNJ3,KCNH7,NFE2L2,OSBPL6,UBE2E3,ITGA4,ZFP804A,RASGRP1,JAG1,DHX35,PREX1,DOK5,GNAS,ATP5E,ZFP831,EDN3,ZFP931,DNAJC5B,FAT4,HSPA4L,SLC7A11,MAML3,TIPARP,LRBA,UBE2Q1,CGN,PI4KB,ANXA9,ENSA,OTUD7B,SF3B4,FCGR1,…
TF	Factor: WT1; motif: SMCNCCNSC; match class: 1	TF:M01118_1	0.00405815	2.39167	4601	1462	379	21833	FAM135A,STK17B,MOB4,BOLL,SATB2,ERBB4,IGFBP5,TNS1,VIL1,DNAJB2,SLC4A3,DPP10,MDM4,BRINP3,1700025G04RIK,ASTN1,OLFR16,DTL,LAMB3,MSRB2,OTUD1,ETL4,ACVR2A,UBE2E3,ITGA4,NEUROD1,ZFP804A,TFPI,SRC,DHX35,GNAS,ZFP831,RALYL,CYPT12,CYP7B1,DNAJC5B,HSPA4L,LRBA,PMVK,KCNN3,TUFT1,PI4KB,PIP5K1A,ARNT,ENSA,OTUD7B,SF3B4,FCGR1,CD160,BCL9,PDE4DIP,SPAG17,IGSF3,COL11A1,OLFM3,SNX7,ANK2,LMO4,CCDC171,BNC2,SH3GL2,SLC24A2,AGBL4,5…
TF	Factor: SP100; motif: NNCGTCGNNTAAWNN	TF:M02913	0.00446084	2.35058	8512	1462	653	21833	PCMTD1,EYA1,JPH1,OGFRL1,FAM135A,STK17B,HECW2,ANKRD44,COQ10B,MOB4,BOLL,PLCL1,TYW5,UNC80,ERBB4,IGFBP5,TNS1,CXCR2,ARPC2,EPHA4,DNER,CAB39,SLC41A1,CRB1,PLA2G4A,EDEM3,1700025G04RIK,RGS7,CCDC121,ANGEL2,DTL,ANKRD16,PIP4K2A,ARMC3,OTUD1,ETL4,GPR158,ACVR2A,KCNH7,CERS6,LRP2,MTX2,NFE2L2,TTC30A1,UBE2E3,DNAJC10,NUP35,ZFP804A,D430041D05RIK,JAG1,MACROD2,MANBAL,PREX1,DOK5,NELFCD,ATP5E,ZFP931,EEF1A2,YTHDF3,CYPT12,C…
TF	Factor: MZF-1; motif: TGGGGAR	TF:M01733	0.00484164	2.31501	10436	1462	783	21833	OPRK1,PCMTD1,SNTG1,EYA1,JPH1,DEFB41,OGFRL1,TMEFF2,OSGEPL1,STK17B,HECW2,PGAP1,ANKRD44,MOB4,RFTN2,BOLL,SATB2,TYW5,CRYGF,UNC80,CPS1,ERBB4,ATIC,IGFBP5,TNS1,CXCR2,CXCR1,ARPC2,VIL1,DNAJB2,SLC4A3,EPHA4,CAB39,SPP2,DPP10,SLC41A1,CRB1,PLA2G4A,HMCN1,SEC16B,ASTN1,VSIG8,OLFR16,RGS7,CCDC121,PROX1,RPS6KC1,LAMB3,MALRD1,PIP4K2A,GPR158,MYO3A,KCNT1,OLFR342,ACVR2A,KCNJ3,KCNH7,LRP2,MTX2,NFE2L2,OSBPL6,UBE2E3,ITGA4,CER…
TF	Factor: AP-2gamma; motif: GCCYNCRGSN; match class: 1	TF:M03811_1	0.00530125	2.27562	2329	1462	210	21833	ATIC,DNAJB2,SLC4A3,OTUD1,NFE2L2,TTC30A1,OSBPL6,ITGA4,RASGRP1,SPG11,MACROD2,SRC,EEF1A2,FAT4,OTUD7B,TBX15,PTBP2,UGT8A,WWP1,TUSC1,PHC2,ZFP362,ANKIB1,CLNK,TMEM175,COX6A1,TMEM132D,ADGRD1,MMP17,PSPH,RABGEF1,AGK,CCSER1,MAGI1,LRIG1,PDZRN3,PRMT8,GPRC5A,PPFIBP1,AKAP13,XPO6,GLRX3,INSR,ABHD13,CSGALNACT1,VPS35,N4BP1,CNOT1,ZC3H12C,RORA,RASA2,PLAGL1,MAP3K5,MAP7,CCDC6,TFAM,BCR,ATP2B1,PAWR,BBS10,HMGA2,KIF5A,GLRA1…
TF	Factor: EGR; motif: CGCCCCCGCNN; match class: 1	TF:M08878_1	0.00533177	2.27313	1863	1462	174	21833	TMEFF2,STK17B,PGAP1,BOLL,UNC80,USP37,DNAJB2,DPP10,DUSP10,KCNT1,CERS6,UBE2E3,BTBD3,PREX1,GNAS,ENSA,PRPF3,ANP32E,BCL9,PTBP2,LMO4,ASTN2,SH3GL2,SSBP3,CSMD2,CDK6,DMTF1,STK32B,FZD10,MMP17,CAPZA2,CCSER1,MAGI1,GPRC5A,PLEKHA5,PPFIBP1,STX1B,ZFP668,GLRX3,TCERG1L,RBPMS,NR3C2,ZFP423,CADM1,TLE3,TPBG,TBC1D2B,SPSB4,ZBTB2,MAP7,ENPP1,ECHDC1,WASF1,CCDC6,ATP2B1,PAWR,KIF5A,NPEPPS,NOVA1,SIPA1L1,DNAL1,GALC,ELMO1,DSP,UB…
TF	Factor: MAZ; motif: GGGGAGGG	TF:M00649	0.00742359	2.12939	8424	1462	645	21833	FAM135A,PGAP1,ANKRD44,SF3B1,MOB4,RFTN2,BOLL,SATB2,CRYGF,UNC80,ERBB4,IGFBP5,CXCR1,DNAJB2,SLC4A3,CAB39,SPP2,DPP10,MDM4,CRB1,1700025G04RIK,SEC16B,ASTN1,DUSP10,PROX1,ANGEL2,DTL,LAMB3,ANKRD16,ARMC3,MSRB2,OTUD1,ETL4,MYO3A,KCNT1,ACVR2A,KCNJ3,KCNH7,NFE2L2,UBE2E3,ITGA4,CERKL,NEUROD1,ZFP804A,HSD17B12,D430041D05RIK,RASGRP1,SPG11,JAG1,BTBD3,SRC,DHX35,DOK5,GNAS,ZFP831,CDH26,EEF1A2,ZFHX4,MRPS28,RALYL,YTHDF3,CY…
TF	Factor: AP2; motif: GCCYGSGGSN; match class: 1	TF:M08867_1	0.00750101	2.12488	2684	1462	236	21833	FAM135A,HECW2,ANKRD44,MOB4,PLCL1,UNC80,ATIC,ARPC2,ZFP142,DNAJB2,DNER,DPP10,EDEM3,RGS7,ANGEL2,DTL,OTUD1,LRP2,OSBPL6,UBE2E3,ZFP804A,MACROD2,SRC,PREX1,GNAS,FAT4,UBE2Q1,OTUD7B,RNF115,WARS2,IGSF3,UGT8A,LMO4,ASTN2,RASEF,BNC2,SLC24A2,SSBP3,OSBPL9,PTP4A2,FZD1,DMTF1,SRP72,TMEM132D,FZD10,MMP17,PSPH,BAZ1B,CAPZA2,KLRG2,RMND5A,LRIG1,EDEM1,PLEKHA5,SLC1A5,SERGEF,ADAMTS17,TEAD1,KAT8,GLRX3,TCERG1L,WRN,LARGE1,N4BP…
TF	Factor: E2F; motif: NCSCGCSAAAN	TF:M00919	0.00771103	2.11289	5217	1462	421	21833	JPH1,FAM135A,TMEFF2,OSGEPL1,PGAP1,MOB4,PLCL1,SATB2,ATIC,USP37,DNER,CAB39,BRINP3,PLA2G4A,EDEM3,1700025G04RIK,CCDC121,PROX1,DTL,CARLR,4921504E06RIK,KCNT1,KCNH7,TTC30A1,UBE2E3,CERKL,NEUROD1,PDE1A,HSD17B12,D430041D05RIK,SPG11,DOK5,GNAS,ATP5E,RALYL,BBS7,PMVK,KCNN3,2310050C09RIK,TUFT1,PI4KB,PIP5K1A,SETDB1,ANP32E,VPS45,OTUD7B,CD160,BCL9,PDE4DIP,NOTCH2,TTF2,AGL,PTBP2,UGT8A,TTLL7,ORC3,RASEF,BNC2,TUSC1,SSB…
TF	Factor: AP-2gamma; motif: GCCYNCRGSN	TF:M03811	0.00785049	2.1051	7108	1462	554	21833	PCMTD1,OGFRL1,FAM135A,PGAP1,ANKRD44,COQ10B,TYW5,ERBB4,ATIC,TNS1,VIL1,ZFP142,DNAJB2,SLC4A3,EPHA4,CAB39,DPP10,MDM4,EDEM3,1700025G04RIK,VSIG8,CCDC121,ANGEL2,LAMB3,OTUD1,ACVR2A,XIRP2,CERS6,NFE2L2,TTC30A1,OSBPL6,ITGA4,NEUROD1,DNAJC10,FRZB,RASGRP1,SPG11,BTBD3,MACROD2,SRC,PREX1,CTSZ,ZFP831,ZFP931,EEF1A2,YTHDF3,ARMC1,FAT4,SLC7A11,LRBA,PMVK,KCNN3,LCE6A,TUFT1,OTUD7B,CD160,GJA5,BCL9,NOTCH2,REG4,HSD3B1,TBX15…
TF	Factor: WT1; motif: CGCCCCCNCN; match class: 1	TF:M02036_1	0.00813231	2.08979	3155	1462	271	21833	TMEFF2,STK17B,PGAP1,BOLL,PLCL1,UNC80,USP37,DNAJB2,SLC41A1,EDEM3,DUSP10,ANKRD16,KCNT1,NFE2L2,OSBPL6,UBE2E3,JAG1,BTBD3,MACROD2,PREX1,GNAS,UBE2Q1,SETDB1,ENSA,PRPF3,BCL9,AGL,PLPPR5,UGT8A,LMO4,ASTN2,SH3GL2,SSBP3,OSBPL9,CSMD2,PHC2,ZFP362,PTP4A2,CDK6,STEAP1,ZFP804B,DMTF1,UBE3C,SELENOI,CRMP1,STK32B,FZD10,CALN1,CHST12,CAPZA2,CADPS2,CCSER1,MAGI1,PRMT8,ETV6,GPRC5A,PLEKHA5,PPFIBP1,TEAD1,STX1B,GLRX3,TCERG1L,I…
TF	Factor: E2F; motif: TTTSGCGSG	TF:M00939	0.00836471	2.07755	5474	1462	439	21833	JPH1,FAM135A,TMEFF2,OSGEPL1,PGAP1,MOB4,PLCL1,ATIC,USP37,DNER,CAB39,BRINP3,PLA2G4A,EDEM3,1700025G04RIK,CCDC121,PROX1,DTL,CARLR,4921504E06RIK,KCNT1,KCNH7,TTC30A1,UBE2E3,CERKL,NEUROD1,PDE1A,HSD17B12,D430041D05RIK,SPG11,DOK5,GNAS,ATP5E,RALYL,BBS7,SLC7A11,PMVK,KCNN3,2310050C09RIK,TUFT1,PI4KB,PIP5K1A,SETDB1,ENSA,ANP32E,VPS45,OTUD7B,CD160,BCL9,PDE4DIP,NOTCH2,TTF2,AGL,PTBP2,UGT8A,TTLL7,ORC3,RASEF,BNC2,TU…
TF	Factor: Sp5; motif: RNGGRGGNGGRGNNGGGGGAGGRG	TF:M10376	0.00901399	2.04508	4861	1462	395	21833	FAM135A,4931408C20RIK,STK17B,PGAP1,SATB2,IGFBP5,ARPC2,USP37,DNAJB2,SLC4A3,EPHA4,DNER,SLC41A1,MDM4,ASTN1,VSIG8,RGS7,DUSP10,KCTD3,PROX1,ANGEL2,PIP4K2A,ARMC3,MSRB2,KCNH7,CERS6,NFE2L2,UBE2E3,NEUROD1,PDE1A,TFPI,MACROD2,DOK5,GNAS,ZFHX4,CYP7B1,MAML3,TIPARP,LRBA,PMVK,UBAP2L,CHTOP,PI4KB,PIP5K1A,SETDB1,ENSA,OTUD7B,SF3B4,GJA5,BCL9,PDE4DIP,TBX15,IGSF3,COL11A1,SNX7,UGT8A,LMO4,RNF38,CCDC171,SH3GL2,SSBP3,573040…
TF	Factor: E2F; motif: NNTTTCGCGCN	TF:M08875	0.00907413	2.04219	5183	1462	418	21833	SNTG1,JPH1,FAM135A,TMEFF2,PGAP1,ANKRD44,SF3B1,PLCL1,SATB2,UNC80,ERBB4,ATIC,USP37,DNER,CAB39,EDEM3,1700025G04RIK,ASTN1,RGS7,CCDC121,PROX1,DTL,ACVR2A,KCNH7,LRP2,OSBPL6,UBE2E3,PDE1A,HSD17B12,D430041D05RIK,JAG1,DHX35,MAML3,TIPARP,PMVK,UBE2Q1,UBAP2L,CHTOP,TUFT1,CGN,SETDB1,ANP32E,OTUD7B,BCL9,NOTCH2,TTF2,IGSF3,AGL,PLPPR5,PTBP2,UGT8A,ALPK1,ORC3,ASTN2,RASEF,BNC2,SLC24A2,TUSC1,SSBP3,EIF2B3,PSMB2,GJB5,CSMD2…
TF	Factor: Sp1; motif: NGGGGCGGGGN; match class: 1	TF:M07395_1	0.00920025	2.0362	4542	1462	372	21833	OGFRL1,FAM135A,STK17B,BOLL,SATB2,ERBB4,ATIC,USP37,ZFP142,DNAJB2,EPHA4,DNER,DPP10,SLC41A1,1700025G04RIK,DUSP10,KCTD3,ANGEL2,PIP4K2A,4921504E06RIK,MYO3A,ACVR2A,KCNH7,LRP2,NFE2L2,OSBPL6,UBE2E3,NEUROD1,MACROD2,PREX1,GNAS,CTSZ,EDN3,HSPA4L,UBAP2L,TUFT1,CGN,PIP5K1A,SETDB1,OTUD7B,BCL9,SPAG17,IGSF3,ATP1A1,DPYD,PTBP2,LMO4,RNF38,CCDC171,SH3GL2,OSBPL9,CSMD2,PHC2,ZFP362,TMEM39B,KHDRBS1,PEX1,DMTF1,UBE3C,SELENO…
TF	Factor: Zfp740; motif: NCCCCCCCAC	TF:M03944	0.00980034	2.00876	7322	1462	568	21833	ST18,SNTG1,FAM135A,STK17B,PGAP1,MOB4,SATB2,CPS1,ERBB4,IGFBP5,TNS1,ARPC2,VIL1,DNAJB2,SLC4A3,SPP2,DPP10,MDM4,BRINP3,1700025G04RIK,ASTN1,OLFR16,KCTD3,DTL,LAMB3,PIP4K2A,ARMC3,MSRB2,OTUD1,ETL4,ACVR2A,NFE2L2,UBE2E3,ITGA4,NEUROD1,ZFP804A,TFPI,JAG1,MACROD2,SRC,DHX35,GNAS,ZFP831,EEF1A2,ZFHX4,RALYL,CYPT12,CYP7B1,DNAJC5B,HSPA4L,MAML3,TIPARP,LRBA,PMVK,KCNN3,UBE2Q1,UBAP2L,PGLYRP4,TUFT1,PI4KB,PIP5K1A,ANXA9,OTU…
TF	Factor: Egr1; motif: NCCGCCCCCGCANN	TF:M02744	0.0100121	1.99947	3461	1462	293	21833	OGFRL1,FAM135A,TMEFF2,STK17B,BOLL,PLCL1,UNC80,USP37,DNAJB2,EPHA4,DPP10,DUSP10,RPS6KC1,KCNT1,CERS6,NFE2L2,UBE2E3,JAG1,BTBD3,PREX1,GNAS,YTHDF3,PMVK,UBAP2L,CHTOP,SETDB1,ENSA,PRPF3,RNF115,BCL9,PLPPR5,PTBP2,UGT8A,LMO4,RNF38,ASTN2,SH3GL2,SSBP3,NCDN,CSMD2,ZFP362,TMEM39B,KHDRBS1,ZFP804B,DMTF1,UBE3C,TEC,FRYL,OCIAD2,FZD10,CAPZA2,EXOC4,CCSER1,MAGI1,PDZRN3,PRMT8,ETV6,GPRC5A,PPFIBP1,CCDC91,MILL2,TMEM135,TEAD1…
TF	Factor: NGFI-C; motif: WTGCGTGGGYGG; match class: 1	TF:M00244_1	0.0103169	1.98645	1153	1462	116	21833	ST18,BOLL,UNC80,ERBB4,USP37,SLC4A3,CAB39,DUSP10,KCTD3,KCNT1,MTX2,UBE2E3,NEUROD1,BTBD3,YTHDF3,UBAP2L,TUFT1,PRPF3,NOTCH2,PTBP2,LMO4,SSBP3,KHDRBS1,DMTF1,HFM1,MMP17,CCSER1,RMND5A,RAB11FIP5,LRIG1,ETV6,GPRC5A,PPFIBP1,DCTN6,SARAF,ARHGAP10,TLE3,ZBTB2,MTHFD1L,MAP3K5,AHI1,ENPP1,BICC1,ATP2B1,NOVA1,RALGAPA1,ELMO1,GPBP1,PCDH17,DACH1,CDH10,PPARA,FMNL3,1810013L24RIK,SHISA9,APP,RGMB,PDPK1,PKNOX1,ASXL3,NRK,NHS,PP…
TF	Factor: E2F1; motif: NNNNNGCGSSAAAN	TF:M08874	0.0104545	1.9807	5881	1462	467	21833	SNTG1,JPH1,DEFB41,OGFRL1,FAM135A,TMEFF2,PGAP1,ANKRD44,SF3B1,BOLL,PLCL1,SATB2,UNC80,ERBB4,CXCR1,USP37,DNER,CAB39,DPP10,EDEM3,1700025G04RIK,ASTN1,CCDC121,DUSP10,PROX1,DTL,PIP4K2A,ACVR2A,KCNJ3,CERS6,LRP2,OSBPL6,UBE2E3,PDE1A,FRZB,ZFP804A,TFPI,HSD17B12,D430041D05RIK,JAG1,CYP7B1,TIPARP,PMVK,UBE2Q1,UBAP2L,TUFT1,CGN,SETDB1,4930558C23RIK,PRPF3,ANP32E,OTUD7B,BCL9,NOTCH2,TTF2,SNX7,PTBP2,ALPK1,WWP1,ORC3,ASTN…
TF	Factor: E2F-1; motif: NNNSSCGCSAANN; match class: 1	TF:M07250_1	0.012669	1.89726	4142	1462	342	21833	JPH1,FAM135A,TMEFF2,HECW2,ANKRD44,BOLL,ARPC2,USP37,DNER,EDEM3,RGS7,CCDC121,DUSP10,PROX1,DTL,PIP4K2A,ACVR2A,NFE2L2,UBE2E3,FRZB,HSD17B12,D430041D05RIK,MACROD2,DOK5,GNAS,MAML3,UBAP2L,SETDB1,ANP32E,OTUD7B,PLPPR5,PTBP2,LMO4,WWP1,ORC3,BNC2,SH3GL2,TUSC1,SSBP3,PSMB2,CSMD2,ZFP362,KHDRBS1,PTP4A2,PEX1,ANKIB1,SEMA3D,ABCF2,WDR86,UBE3C,SRP72,PARM1,TCHP,SLC15A4,FZD10,MMP17,BAZ1B,CAPZA2,ST7,MRPS33,CCSER1,EIF2AK3…
TF	Factor: ZFP740; motif: NNNTWCCCCCCGGNRNN	TF:M02938	0.0146393	1.83448	3152	1462	269	21833	JPH1,OGFRL1,FAM135A,HECW2,PLCL1,SATB2,UNC80,ERBB4,IGFBP5,TNS1,ARPC2,DNAJB2,SLC4A3,1700025G04RIK,VSIG8,CARLR,ETL4,KCNT1,KCNJ3,NFE2L2,OSBPL6,FRZB,RASGRP1,GNAS,EEF1A2,MAML3,TIPARP,UBE2Q1,LCE1H,LCE1L,ANXA9,ANP32E,SF3B4,BCL9,TBX15,OLFM3,UGT8A,ANK2,ALPK1,SLC7A13,BNC2,KHDRBS1,PTP4A2,CDK6,ANKIB1,STEAP1,HADHB,KCNIP4,LIMCH1,GABRA2,OCIAD2,HFM1,SFSWAP,MMP17,BAZ1B,MDFIC,CFTR,KLRG2,SRGAP3,NTF3,PRMT8,PLEKHA5,SO…
TF	Factor: E2F1; motif: NNNNNGCGSSAAAN; match class: 1	TF:M08874_1	0.0149707	1.82476	1512	1462	144	21833	SNTG1,TMEFF2,ANKRD44,SF3B1,PLCL1,UNC80,ERBB4,USP37,EDEM3,CCDC121,DUSP10,PROX1,DTL,ACVR2A,LRP2,UBE2E3,JAG1,UBAP2L,TUFT1,SETDB1,NOTCH2,PTBP2,ORC3,TUSC1,SSBP3,CSMD2,PHC2,ZFP362,KHDRBS1,ANKIB1,WDR86,PAICS,TMEM175,MMP17,PSPH,CAPZA2,CCSER1,MAGI1,PDZRN3,CNTN3,AKAP13,TEAD1,DOCK1,WRN,LARGE1,ARHGAP10,SALL1,CNTNAP4,SPSB4,MTHFD1L,SASH1,PLAGL1,MAP3K5,AHI1,ENPP1,SIM1,TFAM,PAWR,NOVA1,MIPOL1,DHRS7,FOXN3,NKD2,CAC…
TF	Factor: KLF3; motif: NNNNNNGGGCGGGGCNNGN	TF:M10278	0.0155178	1.80917	7348	1462	568	21833	OPRK1,OGFRL1,FAM135A,STK17B,HECW2,PGAP1,SF3B1,MOB4,BOLL,SATB2,ERBB4,ATIC,IGFBP5,TNS1,CXCR1,ARPC2,VIL1,USP37,ZFP142,DNAJB2,SLC4A3,EPHA4,DNER,SPP2,DPP10,SLC41A1,BRINP3,1700025G04RIK,OLFR16,DUSP10,KCTD3,PROX1,RPS6KC1,ANGEL2,ANKRD16,CARLR,PIP4K2A,4921504E06RIK,OTUD1,MYO3A,KCNT1,ACVR2A,KCNH7,LRP2,NFE2L2,OSBPL6,UBE2E3,ITGA4,NEUROD1,DNAJC10,HSD17B12,MACROD2,DHX35,PREX1,GNAS,CTSZ,ATP5E,ZFP831,EDN3,EEF1A2…
TF	Factor: Klf17; motif: NGGGCGG	TF:M05407	0.0165823	1.78035	6561	1462	513	21833	OPRK1,ST18,JPH1,OGFRL1,STK17B,HECW2,PGAP1,SF3B1,COQ10B,MOB4,SATB2,ATIC,TNS1,CXCR1,ARPC2,USP37,SLC4A3,DPP10,SLC41A1,KCTD3,PROX1,RPS6KC1,PIP4K2A,MSRB2,ACVR2A,KCNJ3,KCNH7,LRP2,NFE2L2,FRZB,NUP35,TFPI,HSD17B12,D430041D05RIK,SPG11,BTBD3,MACROD2,DHX35,PREX1,DOK5,GNAS,NELFCD,RALYL,HSPA4L,TIPARP,PMVK,KCNN3,CHTOP,TUFT1,CGN,PI4KB,PIP5K1A,ENSA,VPS45,SF3B4,RNF115,GJA5,BCL9,PDE4DIP,SEC22B,NOTCH2,SPAG17,TTF2,IG…
TF	Factor: Zic3; motif: NGGGKGGTC	TF:M00450	0.0180242	1.74414	13962	1462	1010	21833	OPRK1,ST18,PCMTD1,JPH1,4931408C20RIK,TMEFF2,OSGEPL1,STK17B,HECW2,ANKRD44,SF3B1,MOB4,PLCL1,HSFY2,SATB2,CRYGF,UNC80,IGFBP5,TNS1,CXCR2,CXCR1,ARPC2,VIL1,USP37,DNAJB2,SLC4A3,EPHA4,DNER,CAB39,DPP10,SLC41A1,MDM4,CRB1,BRINP3,HMCN1,EDEM3,SEC16B,OLFR16,CEP170,CCDC121,DUSP10,PROX1,RPS6KC1,LAMB3,IL2RA,ANKRD16,MALRD1,CARLR,PIP4K2A,OTUD1,ETL4,KCNT1,ACVR2A,KCNJ3,KCNH7,XIRP2,LRP2,NFE2L2,TTC30A1,OSBPL6,UBE2E3,ITG…
TF	Factor: E2F-3; motif: YTCCCGCCCNCNSNN; match class: 1	TF:M07083_1	0.0180729	1.74297	29	1462	10	21833	ACVR2A,PTBP2,PTP4A2,CAPZA2,CLTB,CACNA2D3,CASK,FGF13,HS3ST2,ZADH2
TF	Factor: Egr-1; motif: WTGCGTGGGCGK	TF:M00243	0.0195905	1.70795	4370	1462	357	21833	PCMTD1,OGFRL1,HECW2,PGAP1,ANKRD44,MOB4,BOLL,PLCL1,ERBB4,IGFBP5,USP37,ZFP142,SLC4A3,CAB39,DPP10,DUSP10,KCTD3,DTL,ETL4,KCNT1,KCNJ3,CERS6,LRP2,MTX2,OSBPL6,UBE2E3,NEUROD1,DNAJC10,ZFP804A,BTBD3,MACROD2,UBE2Q1,UBAP2L,CHTOP,TUFT1,SETDB1,ENSA,ANP32E,SF3B4,BCL9,ATP1A1,OLFM3,AGL,PTBP2,UGT8A,LMO4,SH3GL2,SGIP1,SSBP3,OSBPL9,NCDN,ZFP362,TMEM39B,KHDRBS1,CDK6,ZFP804B,DMTF1,PRKAG2,HADHB,FRYL,HFM1,COX6A1,ADGRD1,MM…
TF	Factor: E2F-2; motif: NNNANGGCGCGCNNN	TF:M02742	0.0198384	1.70249	3545	1462	297	21833	FAM135A,HECW2,PGAP1,ANKRD44,SF3B1,BOLL,SATB2,ERBB4,DPP10,PLA2G4A,RGS7,DUSP10,DTL,OTUD1,MTX2,DNAJC10,ZFP804A,D430041D05RIK,JAG1,MACROD2,EDN3,SLC7A11,TIPARP,LRBA,CHTOP,ANP32E,BCL9,TTF2,ATP1A1,SNX7,PTBP2,ANK2,WWP1,ORC3,ASTN2,CCDC171,BNC2,SLC24A2,TUSC1,SSBP3,EIF2B3,FZD1,WDR86,PRKAG2,UBE3C,SELENOI,LIMCH1,FRYL,HFM1,TMEM175,PXMP2,COX6A1,SLC15A4,TMEM132D,RABGEF1,CALN1,AUTS2,BAZ1B,SLC7A1,MDFIC,ST7,CADPS2,…
TF	Factor: AP-2alpha; motif: NGCCYSNNGSN; match class: 1	TF:M01857_1	0.0211439	1.67481	2207	1462	197	21833	JPH1,OGFRL1,FAM135A,HECW2,MOB4,UNC80,ZFP142,DPP10,EDEM3,1700025G04RIK,ANKRD16,OTUD1,KCNH7,OSBPL6,UBE2E3,DOK5,CTSZ,UBE2Q1,OTUD7B,TBX15,IGSF3,ATP1A1,UGT8A,LMO4,ASTN2,SLC24A2,SSBP3,CSMD2,PHC2,ZFP362,STEAP1,UBE3C,CRMP1,PSPH,CALN1,CAPZA2,CFTR,CADPS2,RMND5A,LRIG1,EDEM1,PLEKHA5,XPO6,STX1B,DOCK1,ABHD13,WRN,RBPMS,LARGE1,ZFP423,TLE3,RASA2,ITGA9,NHSL1,PERP,MAP7,BICC1,IPMK,BCR,CRY1,EIF4ENIF1,SHISA6,RNF157,RN…
TF	Factor: AP-2gamma; motif: GCCYNNGGS; match class: 1	TF:M00470_1	0.0239509	1.62068	3417	1462	287	21833	JPH1,FAM135A,HECW2,ANKRD44,SF3B1,MOB4,PLCL1,ATIC,ARPC2,SLC4A3,SLC41A1,PIP4K2A,LRP2,MTX2,NFE2L2,OSBPL6,UBE2E3,D430041D05RIK,JAG1,SRC,PREX1,GNAS,CTSZ,BBS7,HSPA4L,UBE2Q1,OTUD7B,BCL9,IGSF3,ATP1A1,DPYD,PTBP2,LMO4,BNC2,TUSC1,PHC2,ZFP362,TXLNA,KHDRBS1,ANKIB1,DMTF1,ABCF2,PRKAG2,PXMP2,COX6A1,TMEM132D,FZD10,MMP17,PSPH,BAZ1B,CHST12,MDFIC,CADPS2,KLRG2,RMND5A,MAGI1,LRIG1,ETV6,PLEKHA5,LYPD3,AKAP13,FAM181B,TEAD…
TF	Factor: E2F-1; motif: TTTSGCGS	TF:M00431	0.0242143	1.61593	5997	1462	472	21833	JPH1,DEFB41,FAM135A,TMEFF2,HECW2,PGAP1,ANKRD44,BOLL,PLCL1,ATIC,USP37,EPHA4,DNER,CAB39,PLA2G4A,EDEM3,1700025G04RIK,CCDC121,PROX1,RPS6KC1,DTL,ANKRD16,CARLR,PIP4K2A,MSRB2,4921504E06RIK,OTUD1,KCNT1,ACVR2A,KCNH7,TTC30A1,UBE2E3,PDE1A,D430041D05RIK,SPG11,JAG1,DOK5,GNAS,CTSZ,ATP5E,RALYL,FAT4,SLC7A11,MAML3,PMVK,KCNN3,UBE2Q1,UBAP2L,TUFT1,CGN,PIP5K1A,SETDB1,ANP32E,VPS45,OTUD7B,BCL9,NOTCH2,TTF2,IGSF3,AGL,DPY…
TF	Factor: AP-2; motif: GSCCSCRGGCNRNRNN; match class: 1	TF:M00800_1	0.0242161	1.6159	2370	1462	209	21833	ANKRD44,BOLL,ATIC,SLC4A3,SLC41A1,RPS6KC1,ANGEL2,OTUD1,CERS6,OSBPL6,D430041D05RIK,RASGRP1,SPG11,BTBD3,MACROD2,PREX1,GNAS,HSPA4L,MAML3,UBE2Q1,TBX15,ATP1A1,RNF38,CCDC171,BNC2,SSBP3,PHC2,PTP4A2,CDK6,FZD1,DMTF1,UBE3C,CRMP1,HFM1,FZD10,MMP17,CHST12,CAPZA2,EXOC4,FOXI3,MAGI1,LRIG1,PDZRN3,PLEKHA5,PHLDB3,LYPD3,ADAMTS17,AKAP13,KAT8,UNC5D,WRN,RBPMS,N4BP1,ZFP423,CNOT1,ZC3H12C,CCNB2,SASH1,PLAGL1,MAP3K5,MAP7,IPM…
TF	Factor: HIC1; motif: NSNNNNTGCCCSSNN; match class: 1	TF:M01072_1	0.0244385	1.61193	465	1462	56	21833	JPH1,OGFRL1,HECW2,PLCL1,DNAJB2,DNER,FRZB,ZFP804A,BTBD3,PREX1,FAT4,PLPPR5,BNC2,GABRA2,FRYL,FZD10,ZFP668,N4BP1,KIRREL3,RASA2,SHISA6,RNF157,KLF6,NKD2,PLK2,CACNA2D3,ADCY9,LPP,IGSF11,VGLL3,ARID1B,PRR16,MYO5B,TRPC5,TMEM74B,STRADB,SPEG,PLD5,LIN9,MED12L,MBNL1,TRABD2B,ZFP664,RYBP,USP31,HS3ST4,RNF217,PPP1R13B,ADCY2,CETN3,MIER3,SULT4A1,SOS1,CSNK1G3,CDR2,MFSD13B
TF	Factor: CNOT3; motif: GGCCGCGSSS	TF:M01253	0.0248889	1.60399	2690	1462	233	21833	OGFRL1,STK17B,SF3B1,BOLL,PLCL1,ERBB4,USP37,EPHA4,EDEM3,1700025G04RIK,OTUD1,ACVR2A,CERS6,NFE2L2,OSBPL6,UBE2E3,DNAJC10,ZFP804A,JAG1,DHX35,PREX1,GNAS,EEF1A2,TIPARP,UBAP2L,ENSA,OTUD7B,PTBP2,UGT8A,RNF38,BNC2,SH3GL2,TUSC1,SSBP3,OSBPL9,PHC2,ZFP362,DMTF1,SEMA3D,WDR86,UBE3C,SELENOI,HFM1,PXMP2,SLC15A4,FZD10,SFSWAP,RABGEF1,BAZ1B,SLC7A1,ST7,MRPS33,CCSER1,EIF2AK3,EXOC6B,RAB11FIP5,LRIG1,PDZRN3,EDEM1,GRM7,PRMT8…
TF	Factor: CPBP; motif: SNCCCNN; match class: 1	TF:M01822_1	0.0253692	1.59569	19940	1462	1377	21833	OPRK1,ST18,PCMTD1,EYA1,JPH1,OGFRL1,FAM135A,4931408C20RIK,TMEFF2,OSGEPL1,STK17B,HECW2,PGAP1,ANKRD44,SF3B1,COQ10B,MOB4,RFTN2,BOLL,PLCL1,HSFY2,SATB2,TYW5,CRYGF,UNC80,CPS1,ERBB4,ATIC,IGFBP5,TNS1,CXCR2,CXCR1,ARPC2,VIL1,USP37,ZFP142,DNAJB2,SLC4A3,EPHA4,DNER,CAB39,SPP2,DPP10,SLC41A1,MDM4,CRB1,BRINP3,PLA2G4A,HMCN1,EDEM3,1700025G04RIK,SEC16B,ASTN1,VSIG8,OLFR16,RGS7,CEP170,CCDC121,DUSP10,KCTD3,PROX1,RPS6KC…
TF	Factor: Sp3; motif: ASMCTTGGGSRGGG	TF:M00665	0.0275224	1.56031	7309	1462	563	21833	SF3B1,PLCL1,UNC80,ATIC,IGFBP5,TNS1,CXCR2,ARPC2,VIL1,ZFP142,DNAJB2,SLC4A3,DNER,SPP2,DPP10,SLC41A1,MDM4,CRB1,BRINP3,1700025G04RIK,ASTN1,VSIG8,OLFR16,KCTD3,PROX1,LAMB3,ANKRD16,CARLR,ARMC3,MSRB2,4921504E06RIK,OTUD1,KCNJ3,KCNH7,CERS6,MTX2,OSBPL6,UBE2E3,ITGA4,NEUROD1,FRZB,ZFP804A,TFPI,RASGRP1,JAG1,BTBD3,MACROD2,MANBAL,DOK5,GNAS,NELFCD,CTSZ,EDN3,CDH26,EEF1A2,MRPS28,CYPT12,DNAJC5B,BBS7,HSPA4L,LRBA,KCNN3,…
TF	Factor: EGR-1; motif: NGCGKGGGCGKNN; match class: 1	TF:M08996_1	0.0299392	1.52376	923	1462	95	21833	BOLL,USP37,DNAJB2,KCNT1,ACVR2A,CERS6,UBE2E3,BTBD3,ENSA,BCL9,ATP1A1,PTBP2,LMO4,SH3GL2,SSBP3,DMTF1,MMP17,CAPZA2,CCSER1,RMND5A,PLEKHA5,PPFIBP1,ETHE1,TEAD1,GLRX3,TCERG1L,SARAF,TPBG,TBC1D2B,ZBTB2,MAP3K5,ENPP1,CCDC6,PAWR,NOVA1,ELMO1,DSP,GPBP1,UBE2E2,ZC3H13,1810013L24RIK,SHISA9,HIRA,APP,ARID1B,RGMB,SLC37A1,PKNOX1,FBXL17,ASXL3,NRK,PPT1,GPATCH8,ITGB8,MB21D2,BMPR2,RABGAP1L,PCSK2,RRBP1,SYNDIG1,RAB22A,PFN2,P…
TF	Factor: Pax-5; motif: RRMSWGANWYCTNRAGCGKRACSRYNSM; match class: 1	TF:M00144_1	0.031911	1.49606	5544	1462	439	21833	JPH1,TMEFF2,HECW2,MOB4,ERBB4,ARPC2,ZFP142,SLC4A3,DNER,DPP10,MDM4,HMCN1,EDEM3,1700025G04RIK,DUSP10,RPS6KC1,ANGEL2,DTL,CARLR,PIP4K2A,OLFR342,CERS6,MTX2,TTC30A1,ITGA4,D430041D05RIK,SPG11,JAG1,MANBAL,PREX1,DOK5,GNAS,MRPS28,FAT4,LRBA,PMVK,UBE2Q1,UBAP2L,CHTOP,LCE1H,CGN,ARNT,VPS45,OTUD7B,GJA5,TBX15,TTF2,IGSF3,DPYD,UGT8A,LMO4,TTLL7,WWP1,RNF38,BNC2,OSBPL9,AGBL4,NCDN,PHC2,ZFP362,KHDRBS1,CDK6,ANKIB1,AKAP9,C…
TF	Factor: WT1; motif: NGCGGGGGGGTSMMCYN; match class: 1	TF:M05599_1	0.0338428	1.47053	1690	1462	156	21833	STK17B,PLCL1,ERBB4,DPP10,1700025G04RIK,DTL,4921504E06RIK,OTUD1,KCNT1,OSBPL6,UBE2E3,FRZB,GNAS,LRBA,UBAP2L,CD160,BCL9,COL11A1,LMO4,BNC2,SSBP3,PHC2,ZFP362,CFAP69,FRYL,COX6A1,LRRTM4,EDEM1,TMEM72,ETV6,PLEKHA5,PPFIBP1,AKAP13,TEAD1,SETD1A,UNC5D,RBPMS,SORBS2,NR3C2,ZFP423,FAT3,CADM1,CD109,TPBG,TBC1D2B,ITGA9,ZBTB2,PLAGL1,EYA4,L3MBTL3,FAM13C,ATP2B1,LGR5,EIF4ENIF1,NPEPPS,RNF157,DNAL1,GALC,KLF6,DSP,IRX1,TNPO1…
TF	Factor: FKLF; motif: BGGGNGGVMD; match class: 1	TF:M01837_1	0.0343458	1.46413	987	1462	100	21833	SATB2,ERBB4,TNS1,OTUD1,UBE2E3,CERKL,FRZB,GNAS,TIPARP,LRBA,PMVK,SETDB1,RNF38,CSMD2,KHDRBS1,CFAP69,WDR86,PRKAG2,FRYL,MMP17,CALN1,GRM7,AKAP13,SETD1A,STX1B,DOCK1,NR3C2,N4BP1,RORA,PLAGL1,EYA4,ARG1,CCDC6,ATP2B1,PAWR,SLIT3,DSP,NKD2,GPBP1,UBE2E2,CACNA2D3,DACH1,TRPS1,COL14A1,HAS2,SLC38A2,FAIM2,1810013L24RIK,PDPK1,AGPAT1,EPB41L3,SALL3,CABP1,BMPR2,CCNYL1,INHBB,OPN3,LIN9,FAM171B,CHST1,PCSK2,BLCAP,LRRC7,CSF3R…
TF	Factor: E2F-3; motif: NNNWYGGCGCCAMNNNN	TF:M02847	0.0344847	1.46237	1234	1462	120	21833	FAM135A,TMEFF2,EPHA4,EDEM3,DTL,UBE2E3,SPG11,GNAS,MRPS28,CHTOP,OTUD7B,NOTCH2,PLPPR5,TTLL7,ORC3,RASEF,TUSC1,SSBP3,KHDRBS1,MTERF1B,PRKAG2,PARM1,TCHP,SLC7A1,CADPS2,ZFP110,SLC1A5,ETHE1,PRCP,TEAD1,ZFP668,TCERG1L,NR3C2,ARHGAP10,VPS35,SALL1,NTM,RASA2,ZBTB2,MTHFD1L,CITED2,EYA4,CRY1,NEMP1,SHISA6,NOVA1,RALGAPA1,MIPOL1,KLF6,PTDSS1,FAM172A,RNF180,GPBP1,AP3M1,TDRD3,COL14A1,TWF1,1810013L24RIK,ETV5,GM6034,TNFRSF…
TF	Factor: Zic3; motif: NMCCCCCGGGGGGGN	TF:M02837	0.0348396	1.45793	3311	1462	278	21833	JPH1,OGFRL1,FAM135A,ANKRD44,SF3B1,BOLL,ATIC,IGFBP5,TNS1,SLC4A3,CAB39,DPP10,SLC41A1,MDM4,1700025G04RIK,RPS6KC1,ANGEL2,ANKRD16,PIP4K2A,ETL4,NFE2L2,UBE2E3,ITGA4,JAG1,PREX1,DOK5,GNAS,ZFP931,UBE2Q1,PI4KB,ANXA9,OTUD7B,SF3B4,FCGR1,BCL9,TBX15,ATP1A1,OLFM3,PLPPR5,TTLL7,RNF38,BNC2,SLC24A2,PHC2,KHDRBS1,DMTF1,PRKAG2,DPP6,KCNIP4,FRYL,RIMBP2,MMP17,TYW1,UPK3B,CHST12,MDFIC,CADPS2,MRPS33,NOBOX,RMND5A,CRBN,EDEM1,P…
TF	Factor: CKROX; motif: SCCCTCCCC	TF:M01175	0.0358936	1.44498	6347	1462	495	21833	FAM135A,PGAP1,ANKRD44,MOB4,BOLL,SATB2,UNC80,ERBB4,IGFBP5,CXCR1,CAB39,SPP2,DPP10,MDM4,CRB1,1700025G04RIK,SEC16B,ASTN1,DUSP10,PROX1,ANGEL2,DTL,LAMB3,ANKRD16,ARMC3,MSRB2,OTUD1,ACVR2A,KCNH7,NFE2L2,UBE2E3,ITGA4,CERKL,NEUROD1,ZFP804A,HSD17B12,D430041D05RIK,RASGRP1,SPG11,JAG1,BTBD3,SRC,DHX35,DOK5,GNAS,ZFP831,CDH26,EEF1A2,MRPS28,RALYL,YTHDF3,CYP7B1,BBS7,FAT4,MAML3,PMVK,UBE2Q1,CHTOP,PGLYRP4,LCE1H,2310050C…
TF	Factor: Hes1; motif: NNCACGYGNN; match class: 1	TF:M07991_1	0.0424118	1.37251	11393	1462	838	21833	ST18,PCMTD1,JPH1,OGFRL1,TMEFF2,STK17B,HECW2,ANKRD44,SF3B1,COQ10B,MOB4,BOLL,PLCL1,SATB2,TYW5,CRYGF,UNC80,ERBB4,ATIC,TNS1,CXCR2,CXCR1,ARPC2,VIL1,USP37,ZFP142,DNAJB2,EPHA4,DNER,SLC41A1,CRB1,PLA2G4A,HMCN1,EDEM3,1700025G04RIK,RGS7,KCTD3,PROX1,RPS6KC1,ANGEL2,DTL,ANKRD16,PIP4K2A,ARMC3,MSRB2,4921504E06RIK,OTUD1,GPR158,OLFR342,ACVR2A,CERS6,LRP2,MTX2,NFE2L2,OSBPL6,UBE2E3,CERKL,NEUROD1,PPP1R1C,FRZB,ZFP804A,…
TF	Factor: SP6; motif: WGGGCGG	TF:M05455	0.0435379	1.36113	7264	1462	558	21833	OPRK1,PCMTD1,OGFRL1,TMEFF2,OSGEPL1,STK17B,ANKRD44,SF3B1,COQ10B,MOB4,BOLL,TYW5,TNS1,ARPC2,VIL1,USP37,DNAJB2,SLC4A3,CAB39,SLC41A1,MDM4,EDEM3,1700025G04RIK,CCDC121,DUSP10,KCTD3,PROX1,RPS6KC1,ANGEL2,PIP4K2A,4921504E06RIK,OTUD1,GPR158,MYO3A,KCNJ3,KCNH7,NFE2L2,ITGA4,CERKL,NEUROD1,RASGRP1,MACROD2,PREX1,DOK5,GNAS,CTSZ,ATP5E,ZFP831,EDN3,EEF1A2,MRPS28,YTHDF3,ARMC1,BBS7,FAT4,HSPA4L,TIPARP,PMVK,TUFT1,CGN,PI4…
TF	Factor: CPBP; motif: NGGGCGG	TF:M05301	0.0435379	1.36113	7264	1462	558	21833	OPRK1,PCMTD1,OGFRL1,TMEFF2,OSGEPL1,STK17B,ANKRD44,SF3B1,COQ10B,MOB4,BOLL,TYW5,TNS1,ARPC2,VIL1,USP37,DNAJB2,SLC4A3,CAB39,SLC41A1,MDM4,EDEM3,1700025G04RIK,CCDC121,DUSP10,KCTD3,PROX1,RPS6KC1,ANGEL2,PIP4K2A,4921504E06RIK,OTUD1,GPR158,MYO3A,KCNJ3,KCNH7,NFE2L2,ITGA4,CERKL,NEUROD1,RASGRP1,MACROD2,PREX1,DOK5,GNAS,CTSZ,ATP5E,ZFP831,EDN3,EEF1A2,MRPS28,YTHDF3,ARMC1,BBS7,FAT4,HSPA4L,TIPARP,PMVK,TUFT1,CGN,PI4…
TF	Factor: LKLF; motif: NGGGCGG	TF:M05391	0.0435379	1.36113	7264	1462	558	21833	OPRK1,PCMTD1,OGFRL1,TMEFF2,OSGEPL1,STK17B,ANKRD44,SF3B1,COQ10B,MOB4,BOLL,TYW5,TNS1,ARPC2,VIL1,USP37,DNAJB2,SLC4A3,CAB39,SLC41A1,MDM4,EDEM3,1700025G04RIK,CCDC121,DUSP10,KCTD3,PROX1,RPS6KC1,ANGEL2,PIP4K2A,4921504E06RIK,OTUD1,GPR158,MYO3A,KCNJ3,KCNH7,NFE2L2,ITGA4,CERKL,NEUROD1,RASGRP1,MACROD2,PREX1,DOK5,GNAS,CTSZ,ATP5E,ZFP831,EDN3,EEF1A2,MRPS28,YTHDF3,ARMC1,BBS7,FAT4,HSPA4L,TIPARP,PMVK,TUFT1,CGN,PI4…
TF	Factor: Sp3; motif: AGGGCGG	TF:M05665	0.0435379	1.36113	7264	1462	558	21833	OPRK1,PCMTD1,OGFRL1,TMEFF2,OSGEPL1,STK17B,ANKRD44,SF3B1,COQ10B,MOB4,BOLL,TYW5,TNS1,ARPC2,VIL1,USP37,DNAJB2,SLC4A3,CAB39,SLC41A1,MDM4,EDEM3,1700025G04RIK,CCDC121,DUSP10,KCTD3,PROX1,RPS6KC1,ANGEL2,PIP4K2A,4921504E06RIK,OTUD1,GPR158,MYO3A,KCNJ3,KCNH7,NFE2L2,ITGA4,CERKL,NEUROD1,RASGRP1,MACROD2,PREX1,DOK5,GNAS,CTSZ,ATP5E,ZFP831,EDN3,EEF1A2,MRPS28,YTHDF3,ARMC1,BBS7,FAT4,HSPA4L,TIPARP,PMVK,TUFT1,CGN,PI4…
TF	Factor: E2F; motif: NKCGCGCSAAAN	TF:M00920	0.0457214	1.33988	4873	1462	390	21833	JPH1,OSGEPL1,PGAP1,PLCL1,SATB2,ATIC,USP37,DNER,CAB39,BRINP3,PLA2G4A,EDEM3,1700025G04RIK,CCDC121,PROX1,DTL,CARLR,4921504E06RIK,KCNT1,TTC30A1,UBE2E3,CERKL,NEUROD1,PDE1A,D430041D05RIK,SPG11,MACROD2,DOK5,GNAS,BBS7,PMVK,2310050C09RIK,TUFT1,PI4KB,PIP5K1A,SETDB1,PRPF3,ANP32E,VPS45,OTUD7B,CD160,BCL9,PDE4DIP,NOTCH2,TTF2,PTBP2,TTLL7,WWP1,ORC3,RASEF,BNC2,TUSC1,SSBP3,EIF2B3,GJB5,CSMD2,PHC2,ZFP362,KHDRBS1,ANK…
MIRNA	mmu-miR-340-5p	MIRNA:mmu-miR-340-5p	0.00261089	2.58321	572	668	86	6912	PCMTD1,TMEFF2,SLC41A1,CEP170,GPR158,KCNJ3,SLC7A11,ARNT,ANP32E,PDE4DIP,IGSF3,OLFM3,MMP16,SLC24A2,PTP4A2,SELENOI,LIMCH1,ADGRL3,AUTS2,SLC7A1,CNTN3,EDEM1,TENM4,ICE2,TBC1D2B,PDE7B,L3MBTL3,ANK3,IPMK,EIF4ENIF1,SLIT3,FAM172A,AP3M1,DACH1,DOCK9,CDH12,FAM91A1,LSAMP,CADM2,ROBO1,ROBO2,KCNJ6,LNPEP,CRIPT,DPYSL3,JAKMIP2,MBD2,SALL3,SOCS6,PPP6R3,NRK,DCX,AKT3,SPHKAP,RABGAP1L,KLHL20,GREM2,DSTN,NAPB,PFN2,P2RY1,FSTL5,…
CORUM	Eya1/3-Dach1/2-Six1 complex	CORUM:5439	0.0499842	1.30117	3	90	3	1077	EYA1,SIX1,DACH1
HP	Abnormal nasal bridge morphology	HP:0000422	0.0173126	1.76164	984	436	128	4671	EYA1,HECW2,PGAP1,SATB2,UNC80,ATIC,CRB1,EDEM3,LRP2,MTX2,CERKL,JAG1,GNAS,EDN3,EEF1A2,BBS7,FAT4,KCNN3,PRPF3,SF3B4,NOTCH2,WARS2,COL11A1,AGL,DPYD,PEX1,AUTS2,BAZ1B,EIF2AK3,GRM7,SOX5,KAT8,INSR,CSGALNACT1,EDNRA,ZFP423,CNOT1,AHI1,WASF1,SIM1,BCR,BBS10,GRIP1,HMGA2,BCAS3,MYT1L,TPO,RALGAPA1,MAK,TTC37,PDE4D,RARB,ZMIZ1,GATA4,TRPS1,TRAPPC9,PRKDC,HIRA,ARID1B,IFT140,CRIPT,PPP1R21,ASXL3,SMC3,CASK,NSDHL,TAF1,NHS,FRM…
Consulted in gProfiler_mmusculus_30-6-2022 8-12-02__intersections

## Sheet:  gProfiler_mmusculus_30-6-2022
Table S4. Gene ontology enrichment analysis for lysosomal enzyme activities
source	term_name	term_id	adjusted_p_value	negative_log10_of_adjusted_p_value	term_size	query_size	intersection_size	effective_domain_size	intersections
GO:MF	co-SMAD binding	GO:0070410	0.566258	0.246986	11	115	2	25412	SMAD3,SMAD2
GO:MF	I-SMAD binding	GO:0070411	0.92862	0.0321621	14	115	2	25412	SMAD3,SMAD2
GO:MF	SNARE binding	GO:0000149	1	0	110	115	1	25412	SCFD2
GO:MF	sterol transfer activity	GO:0120015	1	0	23	115	1	25412	STARD4
GO:MF	lipid transfer activity	GO:0120013	1	0	47	115	1	25412	STARD4
GO:MF	protein-cysteine methyltransferase activity	GO:0106363	1	0	2	115	1	25412	KMT2A
GO:MF	protein serine kinase activity	GO:0106310	1	0	341	115	5	25412	PKN2,PLK2,STK32A,SIK3,CSNK1G3
GO:MF	tRNA 4-demethylwyosine alpha-amino-alpha-carboxypropyltransferase activity	GO:0102522	1	0	1	115	1	25412	TRMT12
GO:MF	neurotransmitter receptor activity involved in regulation of postsynaptic membrane potential	GO:0099529	1	0	52	115	1	25412	GRID2
GO:MF	structural constituent of postsynapse	GO:0099186	1	0	22	115	1	25412	DLG2
GO:MF	ion channel regulator activity	GO:0099106	1	0	124	115	1	25412	STIM1
GO:MF	postsynaptic neurotransmitter receptor activity	GO:0098960	1	0	66	115	1	25412	GRID2
GO:MF	structural constituent of postsynaptic density	GO:0098919	1	0	10	115	1	25412	DLG2
GO:MF	structural constituent of synapse	GO:0098918	1	0	30	115	1	25412	DLG2
GO:MF	structural constituent of postsynaptic specialization	GO:0098879	1	0	12	115	1	25412	DLG2
GO:MF	molecular function regulator activity	GO:0098772	1	0	1951	115	8	25412	TIAM2,STIM1,CACNG5,ARHGAP28,PREX1,NUCB2,ARHGAP18,ARHGEF1
GO:MF	cell-cell adhesion mediator activity	GO:0098632	1	0	31	115	1	25412	DSCAML1
GO:MF	cell adhesion mediator activity	GO:0098631	1	0	40	115	1	25412	DSCAML1
GO:MF	disordered domain specific binding	GO:0097718	1	0	36	115	2	25412	RRM1,SMAD2
GO:MF	carbohydrate derivative binding	GO:0097367	1	0	2278	115	14	25412	PKN2,RRM1,PEAK1,PKM,SUSD5,GLB1,PLK2,STK32A,DPYSL3,STKLD1,GNAI3,SIK3,ADAMTS5,CSNK1G3
GO:MF	organic cyclic compound binding	GO:0097159	1	0	6918	115	31	25412	STARD4,BARHL2,TFB1M,PKN2,ZFP326,ARNT2,ZFAND6,ME3,RRM1,PEAK1,IMP3,PKM,SMAD3,HLF,BPTF,PLK2,STK32A,SMAD2,STKLD1,GNAI3,TET2,E2F2,ZFP46,HNRNPR,NUCB2,KMT2A,SIK3,ZC3H12C,CSNK1G3,ZFAT,DMRTC2
GO:MF	scaffold protein binding	GO:0097110	1	0	82	115	1	25412	GRID2
GO:MF	methylcytosine dioxygenase activity	GO:0070579	1	0	4	115	1	25412	TET2
GO:MF	lysine-acetylated histone binding	GO:0070577	1	0	23	115	1	25412	KMT2A
GO:MF	R-SMAD binding	GO:0070412	1	0	25	115	2	25412	SMAD3,SMAD2
GO:MF	NADP+ binding	GO:0070401	1	0	5	115	1	25412	ME3
GO:MF	thyroid hormone binding	GO:0070324	1	0	8	115	1	25412	PKM
GO:MF	RNA polymerase binding	GO:0070063	1	0	58	115	2	25412	PKN2,ZFP326
GO:MF	ribonucleoside-diphosphate reductase activity	GO:0061731	1	0	3	115	1	25412	RRM1
GO:MF	ubiquitin-like protein ligase activity	GO:0061659	1	0	321	115	3	25412	TRIM21,ARIH1,SMURF2
GO:MF	cholesterol transfer activity	GO:0120020	1	0	22	115	1	25412	STARD4
GO:MF	ubiquitin protein ligase activity	GO:0061630	1	0	310	115	3	25412	TRIM21,ARIH1,SMURF2
GO:MF	modification-dependent protein binding	GO:0140030	1	0	226	115	3	25412	ZFAND6,BPTF,KMT2A
GO:MF	methylation-dependent protein binding	GO:0140034	1	0	133	115	1	25412	BPTF
GO:MF	promoter-specific chromatin binding	GO:1990841	1	0	67	115	1	25412	SMAD3
GO:MF	sequence-specific double-stranded DNA binding	GO:1990837	1	0	1502	115	10	25412	BARHL2,ARNT2,SMAD3,HLF,BPTF,SMAD2,E2F2,ZFP46,ZFAT,DMRTC2
GO:MF	ubiquitin ligase-substrate adaptor activity	GO:1990756	1	0	71	115	1	25412	ARRDC4
GO:MF	transmitter-gated ion channel activity involved in regulation of postsynaptic membrane potential	GO:1904315	1	0	49	115	1	25412	GRID2
GO:MF	phosphatidylinositol bisphosphate binding	GO:1902936	1	0	108	115	1	25412	TTPAL
GO:MF	phosphatidylinositol phosphate binding	GO:1901981	1	0	178	115	1	25412	TTPAL
GO:MF	sulfur compound binding	GO:1901681	1	0	272	115	2	25412	DPYSL3,ADAMTS5
GO:MF	heterocyclic compound binding	GO:1901363	1	0	6837	115	30	25412	BARHL2,TFB1M,PKN2,ZFP326,ARNT2,ZFAND6,ME3,RRM1,PEAK1,IMP3,PKM,SMAD3,HLF,BPTF,PLK2,STK32A,SMAD2,STKLD1,GNAI3,TET2,E2F2,ZFP46,HNRNPR,NUCB2,KMT2A,SIK3,ZC3H12C,CSNK1G3,ZFAT,DMRTC2
GO:MF	nucleoside phosphate binding	GO:1901265	1	0	2188	115	11	25412	PKN2,ME3,RRM1,PEAK1,PKM,PLK2,STK32A,STKLD1,GNAI3,SIK3,CSNK1G3
GO:MF	enzyme-substrate adaptor activity	GO:0140767	1	0	71	115	1	25412	ARRDC4
GO:MF	ATP-dependent activity	GO:0140657	1	0	545	115	1	25412	BPTF
GO:MF	catalytic activity, acting on a nucleic acid	GO:0140640	1	0	586	115	4	25412	TFB1M,BPTF,ZC3H12C,TRMT12
GO:MF	cytoskeleton-nuclear membrane anchor activity	GO:0140444	1	0	5	115	1	25412	SYNE2
GO:MF	immune receptor activity	GO:0140375	1	0	130	115	1	25412	IL22RA1
GO:MF	solute:anion antiporter activity	GO:0140323	1	0	48	115	1	25412	SLC9A9
GO:MF	DNA-binding transcription factor binding	GO:0140297	1	0	498	115	3	25412	ARNT2,SMAD3,SMAD2
GO:MF	transcription regulator activity	GO:0140110	1	0	1811	115	11	25412	BARHL2,TFB1M,ARNT2,TRIM21,SMAD3,HLF,SMAD2,E2F2,ZFP46,ZFAT,DMRTC2
GO:MF	catalytic activity, acting on a rRNA	GO:0140102	1	0	19	115	1	25412	TFB1M
GO:MF	catalytic activity, acting on a tRNA	GO:0140101	1	0	142	115	1	25412	TRMT12
GO:MF	catalytic activity, acting on RNA	GO:0140098	1	0	388	115	3	25412	TFB1M,ZC3H12C,TRMT12
GO:MF	catalytic activity, acting on DNA	GO:0140097	1	0	219	115	1	25412	BPTF
GO:MF	catalytic activity, acting on a protein	GO:0140096	1	0	2309	115	16	25412	PRSS39,PKN2,TRIM21,PEAK1,LOXL1,ARIH1,SMURF2,PLK2,STK32A,STKLD1,LNX1,XYLT1,KMT2A,SIK3,ADAMTS5,CSNK1G3
GO:MF	acetylation-dependent protein binding	GO:0140033	1	0	23	115	1	25412	KMT2A
GO:MF	RNA polymerase II-specific DNA-binding transcription factor binding	GO:0061629	1	0	372	115	3	25412	ARNT2,SMAD3,SMAD2
GO:MF	nucleoside-triphosphatase regulator activity	GO:0060589	1	0	441	115	6	25412	TIAM2,ARHGAP28,PREX1,NUCB2,ARHGAP18,ARHGEF1
GO:MF	molecular adaptor activity	GO:0060090	1	0	416	115	3	25412	ARRDC4,SYNE2,PDE4DIP
GO:MF	alcohol binding	GO:0043178	1	0	88	115	1	25412	STARD4
GO:MF	RNA polymerase core enzyme binding	GO:0043175	1	0	39	115	1	25412	ZFP326
GO:MF	cation binding	GO:0043169	1	0	4191	115	25	25412	ZFAND6,ME3,STIM1,TRIM21,LOXL1,ARIH1,PKM,SMAD3,BPTF,STK32A,SMAD2,FSTL5,GNAI3,TET2,ZFP46,LNX1,NUCB2,XYLT1,KMT2A,ZC3H12C,CDH6,ADAMTS5,CHSY3,ZFAT,DMRTC2
GO:MF	anion binding	GO:0043168	1	0	2439	115	11	25412	PKN2,ME3,RRM1,PEAK1,PKM,PLK2,STK32A,STKLD1,GNAI3,SIK3,CSNK1G3
GO:MF	ion binding	GO:0043167	1	0	5914	115	32	25412	PKN2,ZFAND6,ME3,STIM1,RRM1,TRIM21,PEAK1,LOXL1,ARIH1,PKM,SMAD3,BPTF,PLK2,STK32A,SMAD2,STKLD1,FSTL5,GNAI3,TET2,ZFP46,LNX1,NUCB2,XYLT1,KMT2A,SIK3,ZC3H12C,CDH6,ADAMTS5,CSNK1G3,CHSY3,ZFAT,DMRTC2
GO:MF	ubiquitin binding	GO:0043130	1	0	97	115	1	25412	SMAD3
GO:MF	gamma-tubulin binding	GO:0043015	1	0	32	115	1	25412	FEZ1
GO:MF	ATP-dependent protein binding	GO:0043008	1	0	11	115	1	25412	PLK2
GO:MF	histone deacetylase binding	GO:0042826	1	0	127	115	1	25412	PKN2
GO:MF	Wnt receptor activity	GO:0042813	1	0	15	115	1	25412	FZD10
GO:MF	protein homodimerization activity	GO:0042803	1	0	759	115	8	25412	TENM4,SMAD3,PDCD6IP,GLB1,IZUMO3,MYOM3,KMT2A,DSCAML1
GO:MF	identical protein binding	GO:0042802	1	0	2299	115	19	25412	TENM4,STIM1,RRM1,TRIM21,PEAK1,PKM,SMAD3,PDCD6IP,GLB1,SMURF2,DPYSL3,SMAD2,IZUMO3,MYOM3,LNX1,GRID2,KMT2A,DSCAML1,DMRTC2
GO:MF	histone methyltransferase activity (H3-K4 specific)	GO:0042800	1	0	19	115	1	25412	KMT2A
GO:MF	hormone binding	GO:0042562	1	0	88	115	1	25412	PKM
GO:MF	histone binding	GO:0042393	1	0	298	115	2	25412	BPTF,KMT2A
GO:MF	xylosyltransferase activity	GO:0042285	1	0	11	115	1	25412	XYLT1
GO:MF	histone methyltransferase activity	GO:0042054	1	0	58	115	1	25412	KMT2A
GO:MF	interleukin-20 binding	GO:0042015	1	0	3	115	1	25412	IL22RA1
GO:MF	signaling receptor activity	GO:0038023	1	0	2534	115	20	25412	VMN2R66,VMN2R67,VMN2R68,VMN2R69,VMN2R70,VMN2R71,VMN2R74,OLFR310,VMN2R77,VMN2R78,VMN2R79,OLFR547,OLFR566,OLFR575,OLFR605,OLFR624,IL22RA1,FZD10,GRID2,AGTR1A
GO:MF	small molecule binding	GO:0036094	1	0	2561	115	12	25412	STARD4,PKN2,ME3,RRM1,PEAK1,PKM,PLK2,STK32A,STKLD1,GNAI3,SIK3,CSNK1G3
GO:MF	purine ribonucleoside triphosphate binding	GO:0035639	1	0	1839	115	10	25412	PKN2,RRM1,PEAK1,PKM,PLK2,STK32A,STKLD1,GNAI3,SIK3,CSNK1G3
GO:MF	chondroitin sulfate binding	GO:0035374	1	0	10	115	1	25412	DPYSL3
GO:MF	nuclear glucocorticoid receptor binding	GO:0035259	1	0	19	115	1	25412	SMAD3
GO:MF	UDP-xylosyltransferase activity	GO:0035252	1	0	9	115	1	25412	XYLT1
GO:MF	phosphatidylinositol binding	GO:0035091	1	0	280	115	1	25412	TTPAL
GO:MF	methylated histone binding	GO:0035064	1	0	133	115	1	25412	BPTF
GO:MF	type I transforming growth factor beta receptor binding	GO:0034713	1	0	12	115	1	25412	SMAD2
GO:MF	bHLH transcription factor binding	GO:0043425	1	0	34	115	1	25412	SMAD3
GO:MF	protein-membrane adaptor activity	GO:0043495	1	0	20	115	1	25412	SYNE2
GO:MF	ADP binding	GO:0043531	1	0	39	115	1	25412	PKM
GO:MF	sequence-specific DNA binding	GO:0043565	1	0	1607	115	11	25412	BARHL2,ARNT2,SMAD3,HLF,BPTF,SMAD2,E2F2,ZFP46,KMT2A,ZFAT,DMRTC2
GO:MF	molecular transducer activity	GO:0060089	1	0	2534	115	20	25412	VMN2R66,VMN2R67,VMN2R68,VMN2R69,VMN2R70,VMN2R71,VMN2R74,OLFR310,VMN2R77,VMN2R78,VMN2R79,OLFR547,OLFR566,OLFR575,OLFR605,OLFR624,IL22RA1,FZD10,GRID2,AGTR1A
GO:MF	NAD binding	GO:0051287	1	0	63	115	1	25412	ME3
GO:MF	phosphoprotein binding	GO:0051219	1	0	105	115	1	25412	DPYSL3
GO:MF	dioxygenase activity	GO:0051213	1	0	91	115	1	25412	TET2
GO:MF	metal ion:proton antiporter activity	GO:0051139	1	0	14	115	1	25412	SLC9A9
GO:MF	GTPase binding	GO:0051020	1	0	309	115	2	25412	PKN2,EXOC2
GO:MF	actin filament binding	GO:0051015	1	0	215	115	2	25412	SYNE2,MYOM3
GO:MF	microtubule plus-end binding	GO:0051010	1	0	19	115	1	25412	STIM1
GO:MF	extracellular matrix binding	GO:0050840	1	0	57	115	1	25412	ADAMTS5
GO:MF	cell adhesion molecule binding	GO:0050839	1	0	290	115	3	25412	TENM4,DSCAML1,CDH6
GO:MF	dopamine receptor binding	GO:0050780	1	0	24	115	1	25412	AGTR1A
GO:MF	NADP binding	GO:0050661	1	0	55	115	1	25412	ME3
GO:MF	N-acetylgalactosaminyl-proteoglycan 3-beta-glucuronosyltransferase activity	GO:0050510	1	0	3	115	1	25412	CHSY3
GO:MF	calcium-dependent protein binding	GO:0048306	1	0	92	115	1	25412	PDCD6IP
GO:MF	protein N-terminus binding	GO:0047485	1	0	127	115	2	25412	FEZ1,EXOC2
GO:MF	glucuronosyl-N-acetylgalactosaminyl-proteoglycan 4-beta-N-acetylgalactosaminyltransferase activity	GO:0047238	1	0	6	115	1	25412	CHSY3
GO:MF	protein dimerization activity	GO:0046983	1	0	1134	115	11	25412	ARNT2,TENM4,SMAD3,PDCD6IP,GLB1,IZUMO3,MYOM3,E2F2,KMT2A,DSCAML1,AGTR1A
GO:MF	protein heterodimerization activity	GO:0046982	1	0	377	115	3	25412	ARNT2,TENM4,AGTR1A
GO:MF	transition metal ion binding	GO:0046914	1	0	1080	115	9	25412	ZFAND6,TRIM21,LOXL1,ARIH1,SMAD3,BPTF,TET2,KMT2A,ADAMTS5
GO:MF	metal ion transmembrane transporter activity	GO:0046873	1	0	417	115	3	25412	STIM1,SLC9A9,CACNG5
GO:MF	metal ion binding	GO:0046872	1	0	4091	115	25	25412	ZFAND6,ME3,STIM1,TRIM21,LOXL1,ARIH1,PKM,SMAD3,BPTF,STK32A,SMAD2,FSTL5,GNAI3,TET2,ZFP46,LNX1,NUCB2,XYLT1,KMT2A,ZC3H12C,CDH6,ADAMTS5,CHSY3,ZFAT,DMRTC2
GO:MF	SMAD binding	GO:0046332	1	0	84	115	3	25412	SMAD3,SMURF2,SMAD2
GO:MF	unmethylated CpG binding	GO:0045322	1	0	9	115	1	25412	KMT2A
GO:MF	cadherin binding	GO:0045296	1	0	66	115	1	25412	CDH6
GO:MF	protein-containing complex binding	GO:0044877	1	0	1522	115	7	25412	ARNT2,DLG2,SMAD3,PLK2,SYNE2,GNAI3,MYOM3
GO:MF	ubiquitin-like protein conjugating enzyme binding	GO:0044390	1	0	42	115	1	25412	ARIH1
GO:MF	ubiquitin-like protein ligase binding	GO:0044389	1	0	329	115	3	25412	ARIH1,SMAD3,SMAD2
GO:MF	tau protein binding	GO:0048156	1	0	22	115	1	25412	SMAD2
GO:MF	mitochondrial transcription factor activity	GO:0034246	1	0	4	115	1	25412	TFB1M
GO:MF	sterol binding	GO:0032934	1	0	56	115	1	25412	STARD4
GO:MF	tumor necrosis factor receptor superfamily binding	GO:0032813	1	0	48	115	1	25412	NUCB2
GO:MF	sterol response element binding	GO:0032810	1	0	3	115	1	25412	SMAD3
GO:MF	calcium ion binding	GO:0005509	1	0	720	115	4	25412	STIM1,FSTL5,NUCB2,CDH6
GO:MF	copper ion binding	GO:0005507	1	0	69	115	1	25412	LOXL1
GO:MF	iron ion binding	GO:0005506	1	0	211	115	1	25412	TET2
GO:MF	steroid binding	GO:0005496	1	0	123	115	1	25412	STARD4
GO:MF	binding	GO:0005488	1	0	16232	115	75	25412	STARD4,BARHL2,TIAM2,TFB1M,DOK5,PKN2,ZFP326,ARNT2,ZFAND6,OLFR310,ME3,DLG2,TENM4,STIM1,RRM1,TRIM21,FEZ1,PEAK1,IMP3,LOXL1,ARIH1,PKM,IQCH,SMAD3,PDCD6IP,SUSD5,GLB1,TMEM100,HLF,SMURF2,BPTF,PLK2,BOC,STK32A,DPYSL3,SMAD2,WDR89,SYNE2,STKLD1,TTPAL,PREX1,FSTL5,VPS45,PDE4DIP,GNAI3,TET2,IZUMO3,IL22RA1,MYOM3,E2F2,ZFP46,HNRNPR,SCFD2,LNX1,FZD10,GRID2,NUCB2,XYLT1,PHLDB1,IFT46,KMT2A,DSCAML1,CEP164,SIK3,APOC3,ZC3H12…
GO:MF	monovalent cation:proton antiporter activity	GO:0005451	1	0	14	115	1	25412	SLC9A9
GO:MF	lipid transporter activity	GO:0005319	1	0	161	115	1	25412	STARD4
GO:MF	calcium channel activity	GO:0005262	1	0	114	115	2	25412	STIM1,CACNG5
GO:MF	cation channel activity	GO:0005261	1	0	331	115	2	25412	STIM1,CACNG5
GO:MF	calcium channel regulator activity	GO:0005246	1	0	37	115	1	25412	STIM1
GO:MF	voltage-gated calcium channel activity	GO:0005245	1	0	45	115	1	25412	CACNG5
GO:MF	voltage-gated ion channel activity	GO:0005244	1	0	190	115	1	25412	CACNG5
GO:MF	extracellular ligand-gated ion channel activity	GO:0005230	1	0	71	115	1	25412	GRID2
GO:MF	ion channel activity	GO:0005216	1	0	438	115	3	25412	STIM1,CACNG5,GRID2
GO:MF	transporter activity	GO:0005215	1	0	1162	115	5	25412	STARD4,STIM1,SLC9A9,CACNG5,GRID2
GO:MF	structural molecule activity	GO:0005198	1	0	790	115	2	25412	DLG2,NCMAP
GO:MF	tumor necrosis factor receptor binding	GO:0005164	1	0	34	115	1	25412	NUCB2
GO:MF	transforming growth factor beta receptor binding	GO:0005160	1	0	24	115	2	25412	SMAD3,SMAD2
GO:MF	cytokine receptor binding	GO:0005126	1	0	315	115	3	25412	SMAD3,SMAD2,NUCB2
GO:MF	signaling receptor binding	GO:0005102	1	0	1679	115	8	25412	ARNT2,SMAD3,PDCD6IP,SMAD2,GNAI3,NUCB2,AGTR1A,ARHGEF1
GO:MF	GTPase activator activity	GO:0005096	1	0	239	115	4	25412	TIAM2,ARHGAP28,ARHGAP18,ARHGEF1
GO:MF	guanyl-nucleotide exchange factor activity	GO:0005085	1	0	221	115	4	25412	TIAM2,PREX1,NUCB2,ARHGEF1
GO:MF	protein kinase C binding	GO:0005080	1	0	61	115	1	25412	FEZ1
GO:MF	olfactory receptor activity	GO:0004984	1	0	1172	115	6	25412	OLFR310,OLFR547,OLFR566,OLFR575,OLFR605,OLFR624
GO:MF	ionotropic glutamate receptor activity	GO:0004970	1	0	19	115	1	25412	GRID2
GO:MF	angiotensin type II receptor activity	GO:0004945	1	0	4	115	1	25412	AGTR1A
GO:MF	G protein-coupled receptor activity	GO:0004930	1	0	1972	115	18	25412	VMN2R66,VMN2R67,VMN2R68,VMN2R69,VMN2R70,VMN2R71,VMN2R74,OLFR310,VMN2R77,VMN2R78,VMN2R79,OLFR547,OLFR566,OLFR575,OLFR605,OLFR624,FZD10,AGTR1A
GO:MF	protein binding	GO:0005515	1	0	10481	115	53	25412	TIAM2,DOK5,PKN2,ZFP326,ARNT2,ZFAND6,DLG2,TENM4,STIM1,RRM1,TRIM21,FEZ1,PEAK1,ARIH1,PKM,IQCH,SMAD3,PDCD6IP,GLB1,TMEM100,SMURF2,BPTF,PLK2,BOC,DPYSL3,SMAD2,WDR89,SYNE2,PREX1,FSTL5,VPS45,PDE4DIP,GNAI3,TET2,IZUMO3,IL22RA1,MYOM3,E2F2,SCFD2,LNX1,FZD10,GRID2,NUCB2,PHLDB1,IFT46,KMT2A,DSCAML1,CEP164,AGTR1A,EXOC2,CDH6,DMRTC2,ARHGEF1
GO:MF	cytokine receptor activity	GO:0004896	1	0	95	115	1	25412	IL22RA1
GO:MF	collagen binding	GO:0005518	1	0	80	115	1	25412	SMAD3
GO:MF	GTP binding	GO:0005525	1	0	387	115	1	25412	GNAI3
GO:MF	cation transmembrane transporter activity	GO:0008324	1	0	608	115	3	25412	STIM1,SLC9A9,CACNG5
GO:MF	lipid binding	GO:0008289	1	0	828	115	4	25412	STARD4,TTPAL,PREX1,APOC3
GO:MF	protein methyltransferase activity	GO:0008276	1	0	92	115	1	25412	KMT2A
GO:MF	zinc ion binding	GO:0008270	1	0	743	115	8	25412	ZFAND6,TRIM21,ARIH1,SMAD3,BPTF,TET2,KMT2A,ADAMTS5
GO:MF	metallopeptidase activity	GO:0008237	1	0	207	115	1	25412	ADAMTS5
GO:MF	serine-type peptidase activity	GO:0008236	1	0	218	115	1	25412	PRSS39
GO:MF	peptidase activity	GO:0008233	1	0	677	115	2	25412	PRSS39,ADAMTS5
GO:MF	heparin binding	GO:0008201	1	0	158	115	1	25412	ADAMTS5
GO:MF	ferrous iron binding	GO:0008198	1	0	32	115	1	25412	TET2
GO:MF	UDP-glycosyltransferase activity	GO:0008194	1	0	151	115	2	25412	XYLT1,CHSY3
GO:MF	tRNA methyltransferase activity	GO:0008175	1	0	31	115	1	25412	TRMT12
GO:MF	RNA methyltransferase activity	GO:0008173	1	0	59	115	2	25412	TFB1M,TRMT12
GO:MF	S-methyltransferase activity	GO:0008172	1	0	10	115	1	25412	KMT2A
GO:MF	N-methyltransferase activity	GO:0008170	1	0	91	115	2	25412	TFB1M,KMT2A
GO:MF	methyltransferase activity	GO:0008168	1	0	208	115	3	25412	TFB1M,KMT2A,TRMT12
GO:MF	transcription factor binding	GO:0008134	1	0	612	115	3	25412	ARNT2,SMAD3,SMAD2
GO:MF	ATP-dependent activity, acting on DNA	GO:0008094	1	0	110	115	1	25412	BPTF
GO:MF	cytoskeletal protein binding	GO:0008092	1	0	1003	115	6	25412	STIM1,FEZ1,DPYSL3,SMAD2,SYNE2,MYOM3
GO:MF	glutamate receptor activity	GO:0008066	1	0	27	115	1	25412	GRID2
GO:MF	enzyme activator activity	GO:0008047	1	0	507	115	4	25412	TIAM2,ARHGAP28,ARHGAP18,ARHGEF1
GO:MF	protein C-terminus binding	GO:0008022	1	0	230	115	1	25412	DLG2
GO:MF	microtubule binding	GO:0008017	1	0	260	115	1	25412	STIM1
GO:MF	beta-catenin binding	GO:0008013	1	0	91	115	1	25412	SMAD3
GO:MF	odorant binding	GO:0005549	1	0	517	115	1	25412	OLFR310
GO:MF	phospholipid binding	GO:0005543	1	0	465	115	2	25412	TTPAL,PREX1
GO:MF	hyaluronic acid binding	GO:0005540	1	0	24	115	1	25412	SUSD5
GO:MF	glycosaminoglycan binding	GO:0005539	1	0	218	115	3	25412	SUSD5,DPYSL3,ADAMTS5
GO:MF	ATP binding	GO:0005524	1	0	1486	115	9	25412	PKN2,RRM1,PEAK1,PKM,PLK2,STK32A,STKLD1,SIK3,CSNK1G3
GO:MF	transmembrane signaling receptor activity	GO:0004888	1	0	2353	115	20	25412	VMN2R66,VMN2R67,VMN2R68,VMN2R69,VMN2R70,VMN2R71,VMN2R74,OLFR310,VMN2R77,VMN2R78,VMN2R79,OLFR547,OLFR566,OLFR575,OLFR605,OLFR624,IL22RA1,FZD10,GRID2,AGTR1A
GO:MF	ubiquitin-protein transferase activity	GO:0004842	1	0	411	115	4	25412	TRIM21,ARIH1,SMURF2,LNX1
GO:MF	ribonucleoside-diphosphate reductase activity, thioredoxin disulfide as acceptor	GO:0004748	1	0	3	115	1	25412	RRM1
GO:MF	DNA binding	GO:0003677	1	0	2406	115	16	25412	BARHL2,TFB1M,ZFP326,ARNT2,ZFAND6,SMAD3,HLF,BPTF,SMAD2,TET2,E2F2,ZFP46,NUCB2,KMT2A,ZFAT,DMRTC2
GO:MF	nucleic acid binding	GO:0003676	1	0	4721	115	20	25412	BARHL2,TFB1M,ZFP326,ARNT2,ZFAND6,IMP3,PKM,SMAD3,HLF,BPTF,SMAD2,TET2,E2F2,ZFP46,HNRNPR,NUCB2,KMT2A,ZC3H12C,ZFAT,DMRTC2
GO:MF	molecular_function	GO:0003674	1	0	25412	115	115	25412	STARD4,BARHL2,TIAM2,TFB1M,PRSS39,LYPLAL1,DOK5,4930433B08RIK,STPG2,PKN2,A830019L24RIK,ZFP326,ARRDC4,ARNT2,ZFAND6,VMN2R66,VMN2R67,VMN2R68,VMN2R69,VMN2R70,VMN2R71,VMN2R74,OLFR310,VMN2R77,VMN2R78,VMN2R79,TMEM135,ME3,DLG2,TENM4,STIM1,RRM1,OLFR547,TRIM21,OLFR566,OLFR575,OLFR605,OLFR624,FEZ1,4931429L15RIK,PEAK1,IMP3,LOXL1,1700072B07RIK,ARIH1,PKM,IQCH,SMAD3,SLC9A9,PDCD6IP,SUSD5,GLB1,TMEM100,HLF,SMURF2,BP…
GO:MF	protease binding	GO:0002020	1	0	180	115	1	25412	STIM1
GO:MF	G-protein alpha-subunit binding	GO:0001965	1	0	38	115	1	25412	NUCB2
GO:MF	G protein-coupled receptor binding	GO:0001664	1	0	313	115	4	25412	PDCD6IP,GNAI3,AGTR1A,ARHGEF1
GO:MF	peptide receptor activity	GO:0001653	1	0	153	115	1	25412	AGTR1A
GO:MF	angiotensin type I receptor activity	GO:0001596	1	0	2	115	1	25412	AGTR1A
GO:MF	angiotensin receptor activity	GO:0001595	1	0	6	115	1	25412	AGTR1A
GO:MF	DNA-binding transcription activator activity, RNA polymerase II-specific	GO:0001228	1	0	504	115	7	25412	BARHL2,ARNT2,SMAD3,HLF,SMAD2,E2F2,ZFAT
GO:MF	DNA-binding transcription repressor activity, RNA polymerase II-specific	GO:0001227	1	0	338	115	1	25412	ZFP46
GO:MF	transcription coactivator binding	GO:0001223	1	0	47	115	1	25412	SMAD3
GO:MF	transcription coregulator binding	GO:0001221	1	0	127	115	1	25412	SMAD3
GO:MF	DNA-binding transcription repressor activity	GO:0001217	1	0	340	115	2	25412	SMAD3,ZFP46
GO:MF	DNA-binding transcription activator activity	GO:0001216	1	0	510	115	7	25412	BARHL2,ARNT2,SMAD3,HLF,SMAD2,E2F2,ZFAT
GO:MF	basal RNA polymerase II transcription machinery binding	GO:0001099	1	0	57	115	1	25412	ZFP326
GO:MF	basal transcription machinery binding	GO:0001098	1	0	57	115	1	25412	ZFP326
GO:MF	transcription regulatory region nucleic acid binding	GO:0001067	1	0	1428	115	10	25412	BARHL2,ARNT2,SMAD3,HLF,BPTF,SMAD2,E2F2,ZFP46,ZFAT,DMRTC2
GO:MF	RNA polymerase II complex binding	GO:0000993	1	0	34	115	1	25412	ZFP326
GO:MF	cis-regulatory region sequence-specific DNA binding	GO:0000987	1	0	1128	115	8	25412	ARNT2,SMAD3,HLF,BPTF,SMAD2,E2F2,ZFAT,DMRTC2
GO:MF	DNA-binding transcription factor activity, RNA polymerase II-specific	GO:0000981	1	0	1286	115	9	25412	BARHL2,ARNT2,SMAD3,HLF,SMAD2,E2F2,ZFP46,ZFAT,DMRTC2
GO:MF	RNA polymerase II cis-regulatory region sequence-specific DNA binding	GO:0000978	1	0	1105	115	8	25412	ARNT2,SMAD3,HLF,BPTF,SMAD2,E2F2,ZFAT,DMRTC2
GO:MF	RNA polymerase II transcription regulatory region sequence-specific DNA binding	GO:0000977	1	0	1327	115	10	25412	BARHL2,ARNT2,SMAD3,HLF,BPTF,SMAD2,E2F2,ZFP46,ZFAT,DMRTC2
GO:MF	transcription cis-regulatory region binding	GO:0000976	1	0	1424	115	10	25412	BARHL2,ARNT2,SMAD3,HLF,BPTF,SMAD2,E2F2,ZFP46,ZFAT,DMRTC2
GO:MF	magnesium ion binding	GO:0000287	1	0	230	115	1	25412	PKM
GO:MF	rRNA (adenine-N6,N6-)-dimethyltransferase activity	GO:0000179	1	0	3	115	1	25412	TFB1M
GO:MF	nucleotide binding	GO:0000166	1	0	2188	115	11	25412	PKN2,ME3,RRM1,PEAK1,PKM,PLK2,STK32A,STKLD1,GNAI3,SIK3,CSNK1G3
GO:MF	chromatin binding	GO:0003682	1	0	606	115	3	25412	SMAD3,SMAD2,KMT2A
GO:MF	double-stranded DNA binding	GO:0003690	1	0	1601	115	10	25412	BARHL2,ARNT2,SMAD3,HLF,BPTF,SMAD2,E2F2,ZFP46,ZFAT,DMRTC2
GO:MF	DNA-binding transcription factor activity	GO:0003700	1	0	1362	115	10	25412	BARHL2,TFB1M,ARNT2,SMAD3,HLF,SMAD2,E2F2,ZFP46,ZFAT,DMRTC2
GO:MF	transcription coregulator activity	GO:0003712	1	0	468	115	1	25412	TRIM21
GO:MF	pyruvate kinase activity	GO:0004743	1	0	2	115	1	25412	PKM
GO:MF	protein-lysine 6-oxidase activity	GO:0004720	1	0	5	115	1	25412	LOXL1
GO:MF	non-membrane spanning protein tyrosine kinase activity	GO:0004715	1	0	44	115	1	25412	PEAK1
GO:MF	protein tyrosine kinase activity	GO:0004713	1	0	139	115	1	25412	PEAK1
GO:MF	protein serine/threonine/tyrosine kinase activity	GO:0004712	1	0	430	115	5	25412	PKN2,PLK2,STK32A,SIK3,CSNK1G3
GO:MF	calcium-dependent protein kinase C activity	GO:0004698	1	0	16	115	1	25412	PKN2
GO:MF	protein kinase C activity	GO:0004697	1	0	17	115	1	25412	PKN2
GO:MF	protein serine/threonine kinase activity	GO:0004674	1	0	438	115	6	25412	PKN2,PLK2,STK32A,STKLD1,SIK3,CSNK1G3
GO:MF	protein kinase activity	GO:0004672	1	0	594	115	7	25412	PKN2,PEAK1,PLK2,STK32A,STKLD1,SIK3,CSNK1G3
GO:MF	beta-galactosidase activity	GO:0004565	1	0	5	115	1	25412	GLB1
GO:MF	hydrolase activity, hydrolyzing O-glycosyl compounds	GO:0004553	1	0	99	115	1	25412	GLB1
GO:MF	ribonuclease activity	GO:0004540	1	0	137	115	1	25412	ZC3H12C
GO:MF	endoribonuclease activity	GO:0004521	1	0	88	115	1	25412	ZC3H12C
GO:MF	acetylgalactosaminyltransferase activity	GO:0008376	1	0	33	115	1	25412	CHSY3
GO:MF	endonuclease activity	GO:0004519	1	0	146	115	1	25412	ZC3H12C
GO:MF	malate dehydrogenase (decarboxylating) (NADP+) activity	GO:0004473	1	0	3	115	1	25412	ME3
GO:MF	malate dehydrogenase (decarboxylating) (NAD+) activity	GO:0004471	1	0	3	115	1	25412	ME3
GO:MF	malic enzyme activity	GO:0004470	1	0	3	115	1	25412	ME3
GO:MF	serine-type endopeptidase activity	GO:0004252	1	0	202	115	1	25412	PRSS39
GO:MF	metalloendopeptidase activity	GO:0004222	1	0	124	115	1	25412	ADAMTS5
GO:MF	endopeptidase activity	GO:0004175	1	0	483	115	2	25412	PRSS39,ADAMTS5
GO:MF	GTPase activity	GO:0003924	1	0	321	115	1	25412	GNAI3
GO:MF	catalytic activity	GO:0003824	1	0	5730	115	30	25412	TFB1M,PRSS39,LYPLAL1,PKN2,ME3,RRM1,TRIM21,PEAK1,LOXL1,ARIH1,PKM,GLB1,SMURF2,BPTF,PLK2,OXR1,STK32A,DPYSL3,STKLD1,GNAI3,TET2,LNX1,XYLT1,KMT2A,SIK3,ZC3H12C,TRMT12,ADAMTS5,CSNK1G3,CHSY3
GO:MF	actin binding	GO:0003779	1	0	449	115	2	25412	SYNE2,MYOM3
GO:MF	mRNA 3'-UTR binding	GO:0003730	1	0	107	115	1	25412	HNRNPR
GO:MF	mRNA binding	GO:0003729	1	0	385	115	3	25412	PKM,HNRNPR,ZC3H12C
GO:MF	RNA binding	GO:0003723	1	0	2340	115	5	25412	TFB1M,IMP3,PKM,HNRNPR,ZC3H12C
GO:MF	transcription coactivator activity	GO:0003713	1	0	252	115	1	25412	TRIM21
GO:MF	nuclease activity	GO:0004518	1	0	216	115	1	25412	ZC3H12C
GO:MF	anion transmembrane transporter activity	GO:0008509	1	0	314	115	1	25412	SLC9A9
GO:MF	G protein-coupled peptide receptor activity	GO:0008528	1	0	144	115	1	25412	AGTR1A
GO:MF	rRNA methyltransferase activity	GO:0008649	1	0	18	115	1	25412	TFB1M
GO:MF	gated channel activity	GO:0022836	1	0	324	115	2	25412	CACNG5,GRID2
GO:MF	transmitter-gated channel activity	GO:0022835	1	0	58	115	1	25412	GRID2
GO:MF	ligand-gated channel activity	GO:0022834	1	0	136	115	1	25412	GRID2
GO:MF	voltage-gated channel activity	GO:0022832	1	0	191	115	1	25412	CACNG5
GO:MF	transmitter-gated ion channel activity	GO:0022824	1	0	58	115	1	25412	GRID2
GO:MF	potassium ion antiporter activity	GO:0022821	1	0	16	115	1	25412	SLC9A9
GO:MF	active transmembrane transporter activity	GO:0022804	1	0	384	115	1	25412	SLC9A9
GO:MF	passive transmembrane transporter activity	GO:0022803	1	0	481	115	3	25412	STIM1,CACNG5,GRID2
GO:MF	cytokine binding	GO:0019955	1	0	144	115	1	25412	IL22RA1
GO:MF	structural constituent of myelin sheath	GO:0019911	1	0	10	115	1	25412	NCMAP
GO:MF	syntaxin binding	GO:0019905	1	0	76	115	1	25412	SCFD2
GO:MF	protein domain specific binding	GO:0019904	1	0	814	115	8	25412	DLG2,RRM1,PDCD6IP,DPYSL3,SMAD2,GNAI3,LNX1,GRID2
GO:MF	protein phosphatase binding	GO:0019903	1	0	179	115	1	25412	DLG2
GO:MF	phosphatase binding	GO:0019902	1	0	226	115	3	25412	DLG2,SMAD3,SMAD2
GO:MF	protein kinase binding	GO:0019901	1	0	751	115	4	25412	FEZ1,SMAD3,AGTR1A,EXOC2
GO:MF	kinase binding	GO:0019900	1	0	841	115	5	25412	DLG2,FEZ1,SMAD3,AGTR1A,EXOC2
GO:MF	enzyme binding	GO:0019899	1	0	2265	115	11	25412	PKN2,ZFP326,DLG2,STIM1,FEZ1,ARIH1,SMAD3,SMAD2,PDE4DIP,AGTR1A,EXOC2
GO:MF	rRNA binding	GO:0019843	1	0	70	115	1	25412	IMP3
GO:MF	ubiquitin-like protein transferase activity	GO:0019787	1	0	432	115	4	25412	TRIM21,ARIH1,SMURF2,LNX1
GO:MF	GDP binding	GO:0019003	1	0	78	115	1	25412	GNAI3
GO:MF	guanyl nucleotide binding	GO:0019001	1	0	410	115	1	25412	GNAI3
GO:MF	histone-lysine N-methyltransferase activity	GO:0018024	1	0	43	115	1	25412	KMT2A
GO:MF	serine hydrolase activity	GO:0017171	1	0	223	115	1	25412	PRSS39
GO:MF	aryl hydrocarbon receptor binding	GO:0017162	1	0	9	115	1	25412	ARNT2
GO:MF	DEAD/H-box RNA helicase binding	GO:0017151	1	0	9	115	1	25412	SMAD3
GO:MF	Wnt-protein binding	GO:0017147	1	0	27	115	1	25412	FZD10
GO:MF	SH3 domain binding	GO:0017124	1	0	125	115	2	25412	PDCD6IP,DPYSL3
GO:MF	voltage-gated cation channel activity	GO:0022843	1	0	140	115	1	25412	CACNG5
GO:MF	active ion transmembrane transporter activity	GO:0022853	1	0	237	115	1	25412	SLC9A9
GO:MF	transmembrane transporter activity	GO:0022857	1	0	1071	115	4	25412	STIM1,SLC9A9,CACNG5,GRID2
GO:MF	inorganic cation transmembrane transporter activity	GO:0022890	1	0	557	115	3	25412	STIM1,SLC9A9,CACNG5
GO:MF	GTPase activating protein binding	GO:0032794	1	0	21	115	1	25412	GNAI3
GO:MF	guanyl ribonucleotide binding	GO:0032561	1	0	410	115	1	25412	GNAI3
GO:MF	adenyl ribonucleotide binding	GO:0032559	1	0	1556	115	9	25412	PKN2,RRM1,PEAK1,PKM,PLK2,STK32A,STKLD1,SIK3,CSNK1G3
GO:MF	purine ribonucleotide binding	GO:0032555	1	0	1919	115	10	25412	PKN2,RRM1,PEAK1,PKM,PLK2,STK32A,STKLD1,GNAI3,SIK3,CSNK1G3
GO:MF	ribonucleotide binding	GO:0032553	1	0	1938	115	10	25412	PKN2,RRM1,PEAK1,PKM,PLK2,STK32A,STKLD1,GNAI3,SIK3,CSNK1G3
GO:MF	ubiquitin-like protein binding	GO:0032182	1	0	119	115	1	25412	SMAD3
GO:MF	nuclear mineralocorticoid receptor binding	GO:0031962	1	0	1	115	1	25412	SMAD3
GO:MF	proteinase activated receptor binding	GO:0031871	1	0	3	115	1	25412	PDCD6IP
GO:MF	G protein-coupled serotonin receptor binding	GO:0031821	1	0	5	115	1	25412	GNAI3
GO:MF	D1 dopamine receptor binding	GO:0031748	1	0	14	115	1	25412	AGTR1A
GO:MF	bradykinin receptor binding	GO:0031711	1	0	4	115	1	25412	AGTR1A
GO:MF	G-protein beta/gamma-subunit complex binding	GO:0031683	1	0	24	115	1	25412	GNAI3
GO:MF	ubiquitin protein ligase binding	GO:0031625	1	0	311	115	3	25412	ARIH1,SMAD3,SMAD2
GO:MF	nucleoside-triphosphatase activity	GO:0017111	1	0	672	115	1	25412	GNAI3
GO:MF	ubiquitin conjugating enzyme binding	GO:0031624	1	0	36	115	1	25412	ARIH1
GO:MF	chromatin DNA binding	GO:0031490	1	0	101	115	1	25412	SMAD3
GO:MF	alkali metal ion binding	GO:0031420	1	0	21	115	1	25412	PKM
GO:MF	small GTPase binding	GO:0031267	1	0	275	115	2	25412	PKN2,EXOC2
GO:MF	filamin binding	GO:0031005	1	0	16	115	1	25412	DPYSL3
GO:MF	potassium ion binding	GO:0030955	1	0	12	115	1	25412	PKM
GO:MF	GTPase regulator activity	GO:0030695	1	0	441	115	6	25412	TIAM2,ARHGAP28,PREX1,NUCB2,ARHGAP18,ARHGEF1
GO:MF	protein-macromolecule adaptor activity	GO:0030674	1	0	313	115	2	25412	ARRDC4,SYNE2
GO:MF	neurotransmitter receptor activity	GO:0030594	1	0	110	115	1	25412	GRID2
GO:MF	adenyl nucleotide binding	GO:0030554	1	0	1570	115	9	25412	PKN2,RRM1,PEAK1,PKM,PLK2,STK32A,STKLD1,SIK3,CSNK1G3
GO:MF	snoRNA binding	GO:0030515	1	0	33	115	1	25412	IMP3
GO:MF	enzyme regulator activity	GO:0030234	1	0	1206	115	6	25412	TIAM2,ARHGAP28,PREX1,NUCB2,ARHGAP18,ARHGEF1
GO:MF	PDZ domain binding	GO:0030165	1	0	115	115	3	25412	DLG2,LNX1,GRID2
GO:MF	protein xylosyltransferase activity	GO:0030158	1	0	2	115	1	25412	XYLT1
GO:MF	polyubiquitin modification-dependent protein binding	GO:0031593	1	0	56	115	1	25412	ZFAND6
GO:MF	purine nucleotide binding	GO:0017076	1	0	1934	115	10	25412	PKN2,RRM1,PEAK1,PKM,PLK2,STK32A,STKLD1,GNAI3,SIK3,CSNK1G3
GO:MF	nuclear receptor binding	GO:0016922	1	0	158	115	1	25412	SMAD3
GO:MF	channel regulator activity	GO:0016247	1	0	132	115	2	25412	STIM1,CACNG5
GO:MF	galactosidase activity	GO:0015925	1	0	7	115	1	25412	GLB1
GO:MF	tubulin binding	GO:0015631	1	0	370	115	2	25412	STIM1,FEZ1
GO:MF	cation:cation antiporter activity	GO:0015491	1	0	25	115	1	25412	SLC9A9
GO:MF	cholesterol binding	GO:0015485	1	0	47	115	1	25412	STARD4
GO:MF	potassium:proton antiporter activity	GO:0015386	1	0	11	115	1	25412	SLC9A9
GO:MF	sodium:proton antiporter activity	GO:0015385	1	0	11	115	1	25412	SLC9A9
GO:MF	inorganic molecular entity transmembrane transporter activity	GO:0015318	1	0	699	115	4	25412	STIM1,SLC9A9,CACNG5,GRID2
GO:MF	anion:anion antiporter activity	GO:0015301	1	0	48	115	1	25412	SLC9A9
GO:MF	solute:proton antiporter activity	GO:0015299	1	0	18	115	1	25412	SLC9A9
GO:MF	solute:cation antiporter activity	GO:0015298	1	0	29	115	1	25412	SLC9A9
GO:MF	antiporter activity	GO:0015297	1	0	82	115	1	25412	SLC9A9
GO:MF	secondary active transmembrane transporter activity	GO:0015291	1	0	238	115	1	25412	SLC9A9
GO:MF	store-operated calcium channel activity	GO:0015279	1	0	12	115	1	25412	STIM1
GO:MF	ligand-gated ion channel activity	GO:0015276	1	0	134	115	1	25412	GRID2
GO:MF	channel activity	GO:0015267	1	0	481	115	3	25412	STIM1,CACNG5,GRID2
GO:MF	sterol transporter activity	GO:0015248	1	0	31	115	1	25412	STARD4
GO:MF	calcium ion transmembrane transporter activity	GO:0015085	1	0	131	115	2	25412	STIM1,CACNG5
GO:MF	sodium ion transmembrane transporter activity	GO:0015081	1	0	138	115	1	25412	SLC9A9
GO:MF	potassium ion transmembrane transporter activity	GO:0015079	1	0	155	115	1	25412	SLC9A9
GO:MF	proton transmembrane transporter activity	GO:0015078	1	0	101	115	1	25412	SLC9A9
GO:MF	ion transmembrane transporter activity	GO:0015075	1	0	825	115	4	25412	STIM1,SLC9A9,CACNG5,GRID2
GO:MF	glucuronosyltransferase activity	GO:0015020	1	0	35	115	1	25412	CHSY3
GO:MF	calcium-dependent protein kinase activity	GO:0010857	1	0	23	115	1	25412	PKN2
GO:MF	calcium-dependent protein serine/threonine kinase activity	GO:0009931	1	0	22	115	1	25412	PKN2
GO:MF	oxaloacetate decarboxylase activity	GO:0008948	1	0	4	115	1	25412	ME3
GO:MF	S-adenosylmethionine-dependent methyltransferase activity	GO:0008757	1	0	154	115	2	25412	TFB1M,KMT2A
GO:MF	lysine N-methyltransferase activity	GO:0016278	1	0	58	115	1	25412	KMT2A
GO:MF	protein-lysine N-methyltransferase activity	GO:0016279	1	0	58	115	1	25412	KMT2A
GO:MF	kinase activity	GO:0016301	1	0	779	115	8	25412	PKN2,PEAK1,PKM,PLK2,STK32A,STKLD1,SIK3,CSNK1G3
GO:MF	rRNA (adenine) methyltransferase activity	GO:0016433	1	0	6	115	1	25412	TFB1M
GO:MF	carboxy-lyase activity	GO:0016831	1	0	34	115	1	25412	ME3
GO:MF	carbon-carbon lyase activity	GO:0016830	1	0	54	115	1	25412	ME3
GO:MF	lyase activity	GO:0016829	1	0	199	115	1	25412	ME3
GO:MF	hydrolase activity, acting on acid anhydrides, in phosphorus-containing anhydrides	GO:0016818	1	0	728	115	1	25412	GNAI3
GO:MF	hydrolase activity, acting on acid anhydrides	GO:0016817	1	0	728	115	1	25412	GNAI3
GO:MF	hydrolase activity, acting on carbon-nitrogen (but not peptide) bonds	GO:0016810	1	0	136	115	1	25412	DPYSL3
GO:MF	hydrolase activity, acting on glycosyl bonds	GO:0016798	1	0	152	115	1	25412	GLB1
GO:MF	hydrolase activity, acting on ester bonds	GO:0016788	1	0	770	115	1	25412	ZC3H12C
GO:MF	hydrolase activity	GO:0016787	1	0	2460	115	7	25412	PRSS39,LYPLAL1,GLB1,DPYSL3,GNAI3,ZC3H12C,ADAMTS5
GO:MF	phosphotransferase activity, alcohol group as acceptor	GO:0016773	1	0	698	115	8	25412	PKN2,PEAK1,PKM,PLK2,STK32A,STKLD1,SIK3,CSNK1G3
GO:MF	transferase activity, transferring phosphorus-containing groups	GO:0016772	1	0	928	115	8	25412	PKN2,PEAK1,PKM,PLK2,STK32A,STKLD1,SIK3,CSNK1G3
GO:MF	transferase activity, transferring alkyl or aryl (other than methyl) groups	GO:0016765	1	0	66	115	1	25412	TRMT12
GO:MF	pentosyltransferase activity	GO:0016763	1	0	51	115	1	25412	XYLT1
GO:MF	galactoside binding	GO:0016936	1	0	5	115	1	25412	GLB1
GO:MF	hexosyltransferase activity	GO:0016758	1	0	196	115	1	25412	CHSY3
GO:MF	transferase activity, transferring one-carbon groups	GO:0016741	1	0	219	115	3	25412	TFB1M,KMT2A,TRMT12
GO:MF	transferase activity	GO:0016740	1	0	2287	115	17	25412	TFB1M,PKN2,TRIM21,PEAK1,ARIH1,PKM,SMURF2,PLK2,STK32A,STKLD1,LNX1,XYLT1,KMT2A,SIK3,TRMT12,CSNK1G3,CHSY3
GO:MF	oxidoreductase activity, acting on CH or CH2 groups, disulfide as acceptor	GO:0016728	1	0	3	115	1	25412	RRM1
GO:MF	oxidoreductase activity, acting on CH or CH2 groups	GO:0016725	1	0	26	115	1	25412	RRM1
GO:MF	2-oxoglutarate-dependent dioxygenase activity	GO:0016706	1	0	56	115	1	25412	TET2
GO:MF	oxidoreductase activity, acting on paired donors, with incorporation or reduction of molecular oxygen	GO:0016705	1	0	232	115	1	25412	TET2
GO:MF	oxidoreductase activity, acting on the CH-NH2 group of donors, oxygen as acceptor	GO:0016641	1	0	20	115	1	25412	LOXL1
GO:MF	oxidoreductase activity, acting on the CH-NH2 group of donors	GO:0016638	1	0	23	115	1	25412	LOXL1
GO:MF	oxidoreductase activity, acting on the CH-OH group of donors, NAD or NADP as acceptor	GO:0016616	1	0	151	115	1	25412	ME3
GO:MF	malate dehydrogenase activity	GO:0016615	1	0	7	115	1	25412	ME3
GO:MF	oxidoreductase activity, acting on CH-OH group of donors	GO:0016614	1	0	163	115	1	25412	ME3
GO:MF	oxidoreductase activity	GO:0016491	1	0	789	115	5	25412	ME3,RRM1,LOXL1,OXR1,TET2
GO:MF	pyrophosphatase activity	GO:0016462	1	0	725	115	1	25412	GNAI3
GO:MF	glycosyltransferase activity	GO:0016757	1	0	270	115	2	25412	XYLT1,CHSY3
GO:BP	regulation of cellular process	GO:0050794	0.0393599	1.40495	12487	119	77	27543	STARD4,BARHL2,TIAM2,DOK5,PKN2,ZFP326,ARRDC4,ARNT2,ZFAND6,VMN2R66,VMN2R67,VMN2R68,VMN2R69,VMN2R70,VMN2R71,VMN2R74,OLFR310,VMN2R77,VMN2R78,VMN2R79,TMEM135,TENM4,STIM1,RRM1,OLFR547,TRIM21,OLFR566,OLFR575,OLFR605,OLFR624,FEZ1,PEAK1,ARIH1,PKM,SMAD3,PDCD6IP,CLASP2,SUSD5,TMEM100,HLF,SMURF2,BPTF,CACNG5,PLK2,OXR1,BOC,ARHGAP28,STK32A,DPYSL3,SMAD2,SYNE2,PREX1,PDE4DIP,GNAI3,TET2,SYF2,NCMAP,IL22RA1,E2F2,ZFP46…
GO:BP	positive regulation of cellular process	GO:0048522	0.170072	0.769368	6072	119	45	27543	STARD4,BARHL2,TIAM2,DOK5,PKN2,ARRDC4,ARNT2,TENM4,STIM1,RRM1,TRIM21,FEZ1,ARIH1,PKM,SMAD3,PDCD6IP,TMEM100,HLF,SMURF2,BPTF,CACNG5,PLK2,BOC,DPYSL3,SMAD2,SYNE2,PREX1,PDE4DIP,GNAI3,TET2,SYF2,NCMAP,E2F2,HNRNPR,FZD10,GRID2,NUCB2,PHLDB1,KMT2A,AGTR1A,EXOC2,CSNK1G3,ZFAT,MIR30D,DMRTC2
GO:BP	biological regulation	GO:0065007	0.287118	0.54194	14043	119	81	27543	STARD4,BARHL2,TIAM2,DOK5,PKN2,ZFP326,ARRDC4,ARNT2,ZFAND6,VMN2R66,VMN2R67,VMN2R68,VMN2R69,VMN2R70,VMN2R71,VMN2R74,OLFR310,VMN2R77,VMN2R78,VMN2R79,TMEM135,DLG2,TENM4,STIM1,RRM1,OLFR547,TRIM21,OLFR566,OLFR575,OLFR605,OLFR624,FEZ1,PEAK1,ARIH1,PKM,SMAD3,SLC9A9,PDCD6IP,CLASP2,SUSD5,TMEM100,HLF,SMURF2,BPTF,CACNG5,PLK2,OXR1,BOC,ARHGAP28,STK32A,DPYSL3,SMAD2,SYNE2,XKR7,PREX1,PDE4DIP,GNAI3,TET2,SYF2,NCMAP,I…
GO:BP	regulation of biological process	GO:0050789	0.290937	0.536201	13329	119	78	27543	STARD4,BARHL2,TIAM2,DOK5,PKN2,ZFP326,ARRDC4,ARNT2,ZFAND6,VMN2R66,VMN2R67,VMN2R68,VMN2R69,VMN2R70,VMN2R71,VMN2R74,OLFR310,VMN2R77,VMN2R78,VMN2R79,TMEM135,TENM4,STIM1,RRM1,OLFR547,TRIM21,OLFR566,OLFR575,OLFR605,OLFR624,FEZ1,PEAK1,ARIH1,PKM,SMAD3,PDCD6IP,CLASP2,SUSD5,TMEM100,HLF,SMURF2,BPTF,CACNG5,PLK2,OXR1,BOC,ARHGAP28,STK32A,DPYSL3,SMAD2,SYNE2,PREX1,PDE4DIP,GNAI3,TET2,SYF2,NCMAP,IL22RA1,E2F2,ZFP46…
GO:BP	positive regulation of biological process	GO:0048518	0.691385	0.16028	6629	119	46	27543	STARD4,BARHL2,TIAM2,DOK5,PKN2,ARRDC4,ARNT2,TMEM135,TENM4,STIM1,RRM1,TRIM21,FEZ1,ARIH1,PKM,SMAD3,PDCD6IP,TMEM100,HLF,SMURF2,BPTF,CACNG5,PLK2,BOC,DPYSL3,SMAD2,SYNE2,PREX1,PDE4DIP,GNAI3,TET2,SYF2,NCMAP,E2F2,HNRNPR,FZD10,GRID2,NUCB2,PHLDB1,KMT2A,AGTR1A,EXOC2,CSNK1G3,ZFAT,MIR30D,DMRTC2
GO:BP	anatomical structure morphogenesis	GO:0009653	0.758945	0.11979	2781	119	25	27543	BARHL2,TIAM2,TMEM135,TENM4,STIM1,FEZ1,PEAK1,PKM,SMAD3,TMEM100,PLK2,BOC,SMAD2,PREX1,TET2,SYF2,NCMAP,E2F2,GRID2,PHLDB1,DSCAML1,ARHGAP18,AGTR1A,CDH6,ADAMTS5
GO:BP	regulation of organelle assembly	GO:1902115	0.836792	0.0773826	213	119	6	27543	FEZ1,PDCD6IP,PLK2,SYNE2,GRID2,IFT46
GO:BP	regulation of cellular component biogenesis	GO:0044087	0.878172	0.0564205	988	119	13	27543	FEZ1,PEAK1,SMAD3,PDCD6IP,PLK2,ARHGAP28,DPYSL3,SYNE2,PDE4DIP,GRID2,PHLDB1,IFT46,ARHGAP18
GO:BP	regulation of steroid metabolic process	GO:0019218	1	0	115	119	2	27543	STARD4,AGTR1A
GO:BP	regulation of fatty acid metabolic process	GO:0019217	1	0	96	119	1	27543	NUCB2
GO:BP	regulation of lipid metabolic process	GO:0019216	1	0	381	119	3	27543	STARD4,NUCB2,AGTR1A
GO:BP	viral transcription	GO:0019083	1	0	52	119	1	27543	TRIM21
GO:BP	viral gene expression	GO:0019080	1	0	74	119	1	27543	TRIM21
GO:BP	viral genome replication	GO:0019079	1	0	131	119	1	27543	PKN2
GO:BP	virion assembly	GO:0019068	1	0	29	119	1	27543	PDCD6IP
GO:BP	viral life cycle	GO:0019058	1	0	291	119	4	27543	PKN2,TRIM21,PDCD6IP,AGTR1A
GO:BP	phenol-containing compound metabolic process	GO:0018958	1	0	122	119	1	27543	AGTR1A
GO:BP	peptidyl-lysine acetylation	GO:0018394	1	0	200	119	1	27543	KMT2A
GO:BP	internal peptidyl-lysine acetylation	GO:0018393	1	0	188	119	1	27543	KMT2A
GO:BP	peptidyl-tyrosine modification	GO:0018212	1	0	386	119	2	27543	PEAK1,AGTR1A
GO:BP	peptidyl-serine modification	GO:0018209	1	0	355	119	4	27543	PKN2,PLK2,STK32A,CSNK1G3
GO:BP	peptidyl-lysine modification	GO:0018205	1	0	410	119	4	27543	LOXL1,TET2,KMT2A,DMRTC2
GO:BP	peptidyl-cysteine modification	GO:0018198	1	0	50	119	1	27543	OXR1
GO:BP	peptidyl-amino acid modification	GO:0018193	1	0	1298	119	11	27543	PKN2,PEAK1,LOXL1,PLK2,OXR1,STK32A,TET2,KMT2A,AGTR1A,CSNK1G3,DMRTC2
GO:BP	protein oxidation	GO:0018158	1	0	13	119	1	27543	LOXL1
GO:BP	heterocycle biosynthetic process	GO:0018130	1	0	4039	119	17	27543	BARHL2,TFB1M,ZFP326,ARNT2,RRM1,TRIM21,PKM,SMAD3,HLF,BPTF,SMAD2,TET2,E2F2,ZFP46,KMT2A,ZFAT,DMRTC2
GO:BP	peptidyl-cysteine S-nitrosylation	GO:0018119	1	0	16	119	1	27543	OXR1
GO:BP	peptidyl-tyrosine phosphorylation	GO:0018108	1	0	383	119	2	27543	PEAK1,AGTR1A
GO:BP	peptidyl-serine phosphorylation	GO:0018105	1	0	330	119	4	27543	PKN2,PLK2,STK32A,CSNK1G3
GO:BP	peptidyl-lysine oxidation	GO:0018057	1	0	5	119	1	27543	LOXL1
GO:BP	peptidyl-lysine dimethylation	GO:0018027	1	0	24	119	2	27543	KMT2A,DMRTC2
GO:BP	peptidyl-lysine monomethylation	GO:0018026	1	0	11	119	1	27543	KMT2A
GO:BP	peptidyl-lysine trimethylation	GO:0018023	1	0	54	119	3	27543	TET2,KMT2A,DMRTC2
GO:BP	peptidyl-lysine methylation	GO:0018022	1	0	150	119	3	27543	TET2,KMT2A,DMRTC2
GO:BP	regulation of exocytosis	GO:0017157	1	0	238	119	2	27543	PDCD6IP,EXOC2
GO:BP	regulation of nucleobase-containing compound metabolic process	GO:0019219	1	0	4088	119	15	27543	BARHL2,ZFP326,ARNT2,TRIM21,SMAD3,HLF,BPTF,SMAD2,TET2,E2F2,ZFP46,HNRNPR,KMT2A,ZFAT,DMRTC2
GO:BP	negative regulation of translation	GO:0017148	1	0	190	119	1	27543	HNRNPR
GO:BP	regulation of phosphate metabolic process	GO:0019220	1	0	1432	119	3	27543	SMAD3,FZD10,AGTR1A
GO:BP	regulation of metabolic process	GO:0019222	1	0	7320	119	30	27543	STARD4,BARHL2,ZFP326,ARRDC4,ARNT2,TMEM135,TRIM21,FEZ1,ARIH1,PKM,SMAD3,HLF,SMURF2,BPTF,PLK2,OXR1,SMAD2,GNAI3,TET2,E2F2,ZFP46,HNRNPR,FZD10,NUCB2,KMT2A,AGTR1A,ADAMTS5,ZFAT,MIR30D,DMRTC2
GO:BP	cell differentiation in hindbrain	GO:0021533	1	0	30	119	1	27543	GRID2
GO:BP	hemoglobin metabolic process	GO:0020027	1	0	21	119	1	27543	TET2
GO:BP	sexual reproduction	GO:0019953	1	0	1076	119	1	27543	DMRTC2
GO:BP	modification-dependent protein catabolic process	GO:0019941	1	0	650	119	4	27543	ARIH1,SMURF2,PLK2,LNX1
GO:BP	cyclic-nucleotide-mediated signaling	GO:0019935	1	0	95	119	1	27543	NUCB2
GO:BP	cAMP-mediated signaling	GO:0019933	1	0	66	119	1	27543	NUCB2
GO:BP	second-messenger-mediated signaling	GO:0019932	1	0	311	119	3	27543	TMEM100,NUCB2,AGTR1A
GO:BP	lipid storage	GO:0019915	1	0	98	119	2	27543	STARD4,TMEM135
GO:BP	axonal transport of mitochondrion	GO:0019896	1	0	17	119	1	27543	FEZ1
GO:BP	cytosine metabolic process	GO:0019858	1	0	2	119	1	27543	TET2
GO:BP	5-methylcytosine metabolic process	GO:0019857	1	0	3	119	1	27543	TET2
GO:BP	carboxylic acid metabolic process	GO:0019752	1	0	939	119	4	27543	STARD4,ME3,PKM,NUCB2
GO:BP	cellular homeostasis	GO:0019725	1	0	794	119	3	27543	STIM1,SLC9A9,NUCB2
GO:BP	calcium-mediated signaling	GO:0019722	1	0	198	119	2	27543	TMEM100,AGTR1A
GO:BP	ribose phosphate metabolic process	GO:0019693	1	0	400	119	2	27543	PKM,GNAI3
GO:BP	deoxyribose phosphate metabolic process	GO:0019692	1	0	47	119	1	27543	RRM1
GO:BP	organophosphate metabolic process	GO:0019637	1	0	914	119	3	27543	RRM1,PKM,GNAI3
GO:BP	protein metabolic process	GO:0019538	1	0	5623	119	31	27543	BARHL2,PRSS39,PKN2,ARRDC4,TRIM21,PEAK1,LOXL1,ARIH1,PKM,SMAD3,PDCD6IP,SMURF2,PLK2,OXR1,STK32A,SMAD2,STKLD1,TET2,HNRNPR,LNX1,FZD10,NUCB2,XYLT1,KMT2A,SIK3,APOC3,AGTR1A,ADAMTS5,CSNK1G3,CHSY3,DMRTC2
GO:BP	aromatic compound catabolic process	GO:0019439	1	0	464	119	2	27543	TET2,HNRNPR
GO:BP	aromatic compound biosynthetic process	GO:0019438	1	0	4050	119	18	27543	BARHL2,TFB1M,ZFP326,ARNT2,RRM1,TRIM21,PKM,SMAD3,HLF,BPTF,SMAD2,TET2,E2F2,ZFP46,KMT2A,AGTR1A,ZFAT,DMRTC2
GO:BP	fatty acid oxidation	GO:0019395	1	0	121	119	1	27543	NUCB2
GO:BP	galactose catabolic process	GO:0019388	1	0	5	119	1	27543	GLB1
GO:BP	hexose catabolic process	GO:0019320	1	0	24	119	1	27543	GLB1
GO:BP	hexose metabolic process	GO:0019318	1	0	264	119	2	27543	PKM,GLB1
GO:BP	sensory perception of pain	GO:0019233	1	0	146	119	2	27543	DLG2,TMEM100
GO:BP	regulation of vasoconstriction	GO:0019229	1	0	82	119	1	27543	AGTR1A
GO:BP	transmission of nerve impulse	GO:0019226	1	0	87	119	1	27543	CACNG5
GO:BP	cytokine-mediated signaling pathway	GO:0019221	1	0	451	119	1	27543	IL22RA1
GO:BP	plasma membrane phospholipid scrambling	GO:0017121	1	0	25	119	1	27543	XKR7
GO:BP	regulation of transforming growth factor beta receptor signaling pathway	GO:0017015	1	0	119	119	3	27543	SMAD3,SMURF2,SMAD2
GO:BP	protein nitrosylation	GO:0017014	1	0	17	119	1	27543	OXR1
GO:BP	peptide transport	GO:0015833	1	0	312	119	2	27543	SMAD2,NUCB2
GO:BP	organophosphate ester transport	GO:0015748	1	0	141	119	1	27543	XKR7
GO:BP	protein transport	GO:0015031	1	0	1556	119	14	27543	ARRDC4,ZFAND6,DLG2,SCAMP2,PDCD6IP,CACNG5,SMAD2,VPS45,SCFD2,ARCN1,IFT46,AGTR1A,EXOC2,FAM91A1
GO:BP	heparan sulfate proteoglycan biosynthetic process	GO:0015012	1	0	25	119	1	27543	XYLT1
GO:BP	regulation of lung blood pressure	GO:0014916	1	0	4	119	1	27543	SMAD3
GO:BP	myotube differentiation	GO:0014902	1	0	127	119	2	27543	STIM1,ADAMTS5
GO:BP	cardiac muscle hypertrophy in response to stress	GO:0014898	1	0	27	119	1	27543	SMAD3
GO:BP	striated muscle hypertrophy	GO:0014897	1	0	105	119	1	27543	SMAD3
GO:BP	muscle hypertrophy	GO:0014896	1	0	107	119	1	27543	SMAD3
GO:BP	striated muscle adaptation	GO:0014888	1	0	51	119	1	27543	SMAD3
GO:BP	cardiac muscle adaptation	GO:0014887	1	0	28	119	1	27543	SMAD3
GO:BP	striated muscle cell proliferation	GO:0014855	1	0	79	119	1	27543	TENM4
GO:BP	response to activity	GO:0014823	1	0	88	119	1	27543	AGTR1A
GO:BP	negative regulation of muscle adaptation	GO:0014745	1	0	13	119	1	27543	SMAD3
GO:BP	regulation of muscle hypertrophy	GO:0014743	1	0	73	119	1	27543	SMAD3
GO:BP	negative regulation of muscle hypertrophy	GO:0014741	1	0	34	119	1	27543	SMAD3
GO:BP	striated muscle tissue development	GO:0014706	1	0	269	119	2	27543	TENM4,SMAD3
GO:BP	response to organic cyclic compound	GO:0014070	1	0	1123	119	4	27543	GLB1,SMAD2,GNAI3,AGTR1A
GO:BP	Schwann cell development	GO:0014044	1	0	33	119	1	27543	NCMAP
GO:BP	Schwann cell differentiation	GO:0014037	1	0	40	119	1	27543	NCMAP
GO:BP	positive regulation of gliogenesis	GO:0014015	1	0	82	119	1	27543	TENM4
GO:BP	regulation of gliogenesis	GO:0014013	1	0	126	119	1	27543	TENM4
GO:BP	oligodendrocyte development	GO:0014003	1	0	47	119	1	27543	TENM4
GO:BP	programmed cell death	GO:0012501	1	0	2031	119	13	27543	PKN2,ARNT2,ZFAND6,PKM,SMAD3,PDCD6IP,PLK2,OXR1,XKR7,GNAI3,E2F2,GRID2,AGTR1A
GO:BP	negative regulation of neuron projection development	GO:0010977	1	0	156	119	1	27543	DPYSL3
GO:BP	positive regulation of neuron projection development	GO:0010976	1	0	215	119	2	27543	FEZ1,DPYSL3
GO:BP	regulation of neuron projection development	GO:0010975	1	0	528	119	4	27543	TIAM2,FEZ1,DPYSL3,GRID2
GO:BP	organic hydroxy compound transport	GO:0015850	1	0	292	119	3	27543	STARD4,NUCB2,AGTR1A
GO:BP	phospholipid transport	GO:0015914	1	0	100	119	1	27543	XKR7
GO:BP	sterol transport	GO:0015918	1	0	117	119	1	27543	STARD4
GO:BP	viral process	GO:0016032	1	0	368	119	4	27543	PKN2,TRIM21,PDCD6IP,AGTR1A
GO:BP	protein deubiquitination	GO:0016579	1	0	137	119	1	27543	TRIM21
GO:BP	histone acetylation	GO:0016573	1	0	179	119	1	27543	KMT2A
GO:BP	histone methylation	GO:0016571	1	0	169	119	3	27543	TET2,KMT2A,DMRTC2
GO:BP	histone modification	GO:0016570	1	0	514	119	3	27543	TET2,KMT2A,DMRTC2
GO:BP	protein ubiquitination	GO:0016567	1	0	851	119	5	27543	ARRDC4,TRIM21,ARIH1,SMURF2,LNX1
GO:BP	negative regulation of angiogenesis	GO:0016525	1	0	109	119	2	27543	PLK2,E2F2
GO:BP	cell migration	GO:0016477	1	0	1505	119	10	27543	BARHL2,PKN2,PEAK1,SMAD3,SMURF2,PLK2,DPYSL3,SYNE2,PREX1,AGTR1A
GO:BP	post-transcriptional gene silencing	GO:0016441	1	0	483	119	1	27543	MIR30D
GO:BP	dendrite development	GO:0016358	1	0	295	119	1	27543	PLK2
GO:BP	calcium-dependent cell-cell adhesion via plasma membrane cell adhesion molecules	GO:0016339	1	0	32	119	1	27543	CDH6
GO:BP	calcium-independent cell-cell adhesion via plasma membrane cell-adhesion molecules	GO:0016338	1	0	25	119	1	27543	DSCAML1
GO:BP	dephosphorylation	GO:0016311	1	0	408	119	1	27543	SMAD3
GO:BP	phosphorylation	GO:0016310	1	0	1936	119	11	27543	PKN2,PEAK1,PKM,PLK2,STK32A,SMAD2,STKLD1,FZD10,SIK3,AGTR1A,CSNK1G3
GO:BP	telencephalon development	GO:0021537	1	0	285	119	2	27543	FEZ1,SYNE2
GO:BP	negative regulation of macroautophagy	GO:0016242	1	0	31	119	1	27543	FEZ1
GO:BP	positive regulation of macroautophagy	GO:0016239	1	0	73	119	1	27543	GNAI3
GO:BP	macroautophagy	GO:0016236	1	0	239	119	2	27543	FEZ1,GNAI3
GO:BP	regulation of striated muscle tissue development	GO:0016202	1	0	20	119	1	27543	SMAD3
GO:BP	vesicle-mediated transport	GO:0016192	1	0	1653	119	10	27543	PDCD6IP,CACNG5,XKR7,VPS45,GNAI3,SCFD2,ARCN1,EXOC2,FAM91A1,CSNK1G3
GO:BP	rRNA metabolic process	GO:0016072	1	0	247	119	2	27543	TFB1M,IMP3
GO:BP	mRNA metabolic process	GO:0016071	1	0	1860	119	2	27543	SYF2,HNRNPR
GO:BP	RNA metabolic process	GO:0016070	1	0	7258	119	20	27543	BARHL2,TFB1M,ZFP326,ARNT2,TRIM21,IMP3,SMAD3,HLF,BPTF,SMAD2,TET2,SYF2,E2F2,ZFP46,HNRNPR,KMT2A,ZC3H12C,TRMT12,ZFAT,DMRTC2
GO:BP	Wnt signaling pathway	GO:0016055	1	0	436	119	3	27543	SMAD3,FZD10,CSNK1G3
GO:BP	organic acid biosynthetic process	GO:0016053	1	0	301	119	2	27543	STARD4,PKM
GO:BP	carbohydrate catabolic process	GO:0016052	1	0	149	119	2	27543	PKM,GLB1
GO:BP	vesicle organization	GO:0016050	1	0	280	119	2	27543	PDCD6IP,GNAI3
GO:BP	cell growth	GO:0016049	1	0	533	119	2	27543	BARHL2,SMAD3
GO:BP	cellular component organization	GO:0016043	1	0	7353	119	39	27543	STARD4,BARHL2,TIAM2,PKN2,ZFAND6,TMEM135,DLG2,TENM4,RRM1,FEZ1,PEAK1,SMAD3,PDCD6IP,CLASP2,BPTF,PLK2,BOC,ARHGAP28,DPYSL3,SMAD2,CHCHD6,SYNE2,XKR7,PDE4DIP,GNAI3,TET2,NCMAP,FZD10,GRID2,EMP1,PHLDB1,IFT46,KMT2A,DSCAML1,ARHGAP18,CDH6,FAM91A1,ADAMTS5,DMRTC2
GO:BP	regulation of macroautophagy	GO:0016241	1	0	113	119	2	27543	FEZ1,GNAI3
GO:BP	negative regulation of G2/M transition of mitotic cell cycle	GO:0010972	1	0	63	119	1	27543	SYF2
GO:BP	pallium development	GO:0021543	1	0	190	119	2	27543	FEZ1,SYNE2
GO:BP	hindbrain morphogenesis	GO:0021575	1	0	54	119	1	27543	GRID2
GO:BP	adrenal gland development	GO:0030325	1	0	29	119	2	27543	SMAD3,SMAD2
GO:BP	lung development	GO:0030324	1	0	228	119	1	27543	SMAD2
GO:BP	respiratory tube development	GO:0030323	1	0	231	119	1	27543	SMAD2
GO:BP	negative regulation of cell growth	GO:0030308	1	0	201	119	1	27543	SMAD3
GO:BP	cholesterol transport	GO:0030301	1	0	105	119	1	27543	STARD4
GO:BP	bone mineralization	GO:0030282	1	0	122	119	1	27543	SMAD3
GO:BP	regulation of ossification	GO:0030278	1	0	130	119	1	27543	SMAD3
GO:BP	lipid modification	GO:0030258	1	0	227	119	3	27543	STARD4,NUCB2,AGTR1A
GO:BP	T cell differentiation	GO:0030217	1	0	282	119	1	27543	PREX1
GO:BP	chondroitin sulfate biosynthetic process	GO:0030206	1	0	16	119	1	27543	CHSY3
GO:BP	chondroitin sulfate metabolic process	GO:0030204	1	0	27	119	1	27543	CHSY3
GO:BP	glycosaminoglycan metabolic process	GO:0030203	1	0	98	119	2	27543	XYLT1,CHSY3
GO:BP	heparan sulfate proteoglycan metabolic process	GO:0030201	1	0	30	119	1	27543	XYLT1
GO:BP	extracellular matrix organization	GO:0030198	1	0	296	119	3	27543	SMAD3,PHLDB1,ADAMTS5
GO:BP	neuron differentiation	GO:0030182	1	0	1514	119	11	27543	BARHL2,TIAM2,DOK5,DLG2,TENM4,FEZ1,PLK2,BOC,DPYSL3,GRID2,DSCAML1
GO:BP	positive regulation of Wnt signaling pathway	GO:0030177	1	0	134	119	2	27543	SMAD3,CSNK1G3
GO:BP	proteoglycan biosynthetic process	GO:0030166	1	0	55	119	2	27543	XYLT1,CHSY3
GO:BP	protein catabolic process	GO:0030163	1	0	981	119	6	27543	ARIH1,SMAD3,PDCD6IP,SMURF2,PLK2,LNX1
GO:BP	regulation of proteolysis	GO:0030162	1	0	798	119	4	27543	TRIM21,ARIH1,SMAD3,PLK2
GO:BP	regulation of cell adhesion	GO:0030155	1	0	757	119	4	27543	PEAK1,SMAD3,PREX1,DSCAML1
GO:BP	cell differentiation	GO:0030154	1	0	4646	119	28	27543	BARHL2,TIAM2,DOK5,VMN2R74,DLG2,TENM4,STIM1,FEZ1,PEAK1,SMAD3,TMEM100,HLF,PLK2,BOC,DPYSL3,SMAD2,SYNE2,PREX1,FSTL5,TET2,NCMAP,GRID2,NUCB2,PHLDB1,DSCAML1,ADAMTS5,ZFAT,DMRTC2
GO:BP	regulation of Wnt signaling pathway	GO:0030111	1	0	306	119	2	27543	SMAD3,CSNK1G3
GO:BP	myeloid cell differentiation	GO:0030099	1	0	431	119	1	27543	TET2
GO:BP	lymphocyte differentiation	GO:0030098	1	0	418	119	1	27543	PREX1
GO:BP	hemopoiesis	GO:0030097	1	0	970	119	5	27543	VMN2R74,PREX1,TET2,KMT2A,ZFAT
GO:BP	insulin secretion	GO:0030073	1	0	227	119	1	27543	SMAD2
GO:BP	peptide hormone secretion	GO:0030072	1	0	283	119	2	27543	SMAD2,NUCB2
GO:BP	regulation of cell migration	GO:0030334	1	0	932	119	5	27543	SMAD3,SMURF2,PLK2,DPYSL3,SYNE2
GO:BP	actin filament-based movement	GO:0030048	1	0	125	119	1	27543	SYNE2
GO:BP	positive regulation of cell migration	GO:0030335	1	0	560	119	4	27543	SMAD3,SMURF2,PLK2,SYNE2
GO:BP	nuclear migration along microtubule	GO:0030473	1	0	5	119	1	27543	SYNE2
GO:BP	pancreas development	GO:0031016	1	0	91	119	1	27543	SMAD2
GO:BP	astral microtubule organization	GO:0030953	1	0	12	119	1	27543	PDE4DIP
GO:BP	hindbrain development	GO:0030902	1	0	182	119	2	27543	GRID2,ARCN1
GO:BP	forebrain development	GO:0030900	1	0	423	119	2	27543	FEZ1,SYNE2
GO:BP	thyroid gland development	GO:0030878	1	0	30	119	1	27543	SMAD3
GO:BP	cortical actin cytoskeleton organization	GO:0030866	1	0	39	119	1	27543	PDCD6IP
GO:BP	cortical cytoskeleton organization	GO:0030865	1	0	63	119	1	27543	PDCD6IP
GO:BP	positive regulation of epithelial cell differentiation	GO:0030858	1	0	53	119	1	27543	TMEM100
GO:BP	regulation of epithelial cell differentiation	GO:0030856	1	0	149	119	1	27543	TMEM100
GO:BP	epithelial cell differentiation	GO:0030855	1	0	723	119	2	27543	SMAD3,TMEM100
GO:BP	regulation of actin filament polymerization	GO:0030833	1	0	149	119	2	27543	ARHGAP28,ARHGAP18
GO:BP	regulation of actin filament length	GO:0030832	1	0	170	119	2	27543	ARHGAP28,ARHGAP18
GO:BP	cytoskeleton-dependent intracellular transport	GO:0030705	1	0	183	119	4	27543	DLG2,FEZ1,SYNE2,IFT46
GO:BP	regulation of cellular pH	GO:0030641	1	0	80	119	1	27543	SLC9A9
GO:BP	leukocyte chemotaxis	GO:0030595	1	0	224	119	1	27543	PREX1
GO:BP	neutrophil chemotaxis	GO:0030593	1	0	103	119	1	27543	PREX1
GO:BP	ubiquitin-dependent SMAD protein catabolic process	GO:0030579	1	0	6	119	1	27543	SMURF2
GO:BP	adult behavior	GO:0030534	1	0	171	119	2	27543	OXR1,ARCN1
GO:BP	regulation of axon extension	GO:0030516	1	0	106	119	1	27543	BARHL2
GO:BP	negative regulation of BMP signaling pathway	GO:0030514	1	0	56	119	1	27543	SMURF2
GO:BP	positive regulation of BMP signaling pathway	GO:0030513	1	0	40	119	1	27543	SMAD2
GO:BP	negative regulation of transforming growth factor beta receptor signaling pathway	GO:0030512	1	0	72	119	1	27543	SMURF2
GO:BP	regulation of BMP signaling pathway	GO:0030510	1	0	102	119	2	27543	SMURF2,SMAD2
GO:BP	BMP signaling pathway	GO:0030509	1	0	172	119	4	27543	SMAD3,TMEM100,SMURF2,SMAD2
GO:BP	positive regulation of bone mineralization	GO:0030501	1	0	42	119	1	27543	SMAD3
GO:BP	regulation of bone mineralization	GO:0030500	1	0	82	119	1	27543	SMAD3
GO:BP	tRNA methylation	GO:0030488	1	0	38	119	1	27543	TRMT12
GO:BP	negative regulation of cell migration	GO:0030336	1	0	278	119	1	27543	DPYSL3
GO:BP	actin filament polymerization	GO:0030041	1	0	170	119	2	27543	ARHGAP28,ARHGAP18
GO:BP	contractile actin filament bundle assembly	GO:0030038	1	0	114	119	2	27543	SMAD3,ARHGAP28
GO:BP	actin cytoskeleton organization	GO:0030036	1	0	718	119	6	27543	SMAD3,PDCD6IP,ARHGAP28,DPYSL3,FZD10,ARHGAP18
GO:BP	cerebral cortex development	GO:0021987	1	0	123	119	1	27543	SYNE2
GO:BP	central nervous system neuron differentiation	GO:0021953	1	0	193	119	1	27543	GRID2
GO:BP	forebrain cell migration	GO:0021885	1	0	69	119	1	27543	SYNE2
GO:BP	nucleokinesis involved in cell motility in cerebral cortex radial glia guided migration	GO:0021817	1	0	3	119	1	27543	SYNE2
GO:BP	modulation of microtubule cytoskeleton involved in cerebral cortex radial glia guided migration	GO:0021815	1	0	4	119	1	27543	SYNE2
GO:BP	cell motility involved in cerebral cortex radial glia guided migration	GO:0021814	1	0	7	119	1	27543	SYNE2
GO:BP	cerebral cortex radial glia-guided migration	GO:0021801	1	0	26	119	1	27543	SYNE2
GO:BP	cerebral cortex radially oriented cell migration	GO:0021799	1	0	37	119	1	27543	SYNE2
GO:BP	cerebral cortex cell migration	GO:0021795	1	0	50	119	1	27543	SYNE2
GO:BP	glial cell development	GO:0021782	1	0	116	119	2	27543	TENM4,NCMAP
GO:BP	hippocampus development	GO:0021766	1	0	95	119	1	27543	FEZ1
GO:BP	limbic system development	GO:0021761	1	0	122	119	1	27543	FEZ1
GO:BP	cerebellar granule cell differentiation	GO:0021707	1	0	10	119	1	27543	GRID2
GO:BP	developmental maturation	GO:0021700	1	0	327	119	2	27543	DLG2,ARCN1
GO:BP	cerebellar cortex maturation	GO:0021699	1	0	3	119	1	27543	ARCN1
GO:BP	cerebellar cortex formation	GO:0021697	1	0	32	119	1	27543	GRID2
GO:BP	cerebellar cortex morphogenesis	GO:0021696	1	0	43	119	1	27543	GRID2
GO:BP	cerebellar cortex development	GO:0021695	1	0	65	119	2	27543	GRID2,ARCN1
GO:BP	cerebellar Purkinje cell layer maturation	GO:0021691	1	0	2	119	1	27543	ARCN1
GO:BP	cerebellar granular layer formation	GO:0021684	1	0	10	119	1	27543	GRID2
GO:BP	cerebellar granular layer morphogenesis	GO:0021683	1	0	12	119	1	27543	GRID2
GO:BP	cerebellar granular layer development	GO:0021681	1	0	16	119	1	27543	GRID2
GO:BP	cerebellar Purkinje cell layer development	GO:0021680	1	0	38	119	1	27543	ARCN1
GO:BP	central nervous system maturation	GO:0021626	1	0	9	119	1	27543	ARCN1
GO:BP	cerebellum maturation	GO:0021590	1	0	4	119	1	27543	ARCN1
GO:BP	cerebellum morphogenesis	GO:0021587	1	0	51	119	1	27543	GRID2
GO:BP	hindbrain maturation	GO:0021578	1	0	7	119	1	27543	ARCN1
GO:BP	neurogenesis	GO:0022008	1	0	1822	119	13	27543	BARHL2,TIAM2,DOK5,DLG2,TENM4,FEZ1,PLK2,BOC,DPYSL3,SYNE2,NCMAP,GRID2,DSCAML1
GO:BP	central nervous system myelination	GO:0022010	1	0	25	119	1	27543	TENM4
GO:BP	myelination in peripheral nervous system	GO:0022011	1	0	30	119	1	27543	NCMAP
GO:BP	telencephalon cell migration	GO:0022029	1	0	66	119	1	27543	SYNE2
GO:BP	cell projection assembly	GO:0030031	1	0	566	119	4	27543	DPYSL3,SYNE2,EMP1,IFT46
GO:BP	cell projection organization	GO:0030030	1	0	1627	119	12	27543	BARHL2,TIAM2,PKN2,FEZ1,PLK2,BOC,DPYSL3,SYNE2,GRID2,EMP1,IFT46,DSCAML1
GO:BP	actin filament-based process	GO:0030029	1	0	803	119	7	27543	SMAD3,PDCD6IP,ARHGAP28,DPYSL3,SYNE2,FZD10,ARHGAP18
GO:BP	maintenance of cell polarity	GO:0030011	1	0	20	119	1	27543	PDCD6IP
GO:BP	establishment of cell polarity	GO:0030010	1	0	156	119	1	27543	FEZ1
GO:BP	cellular monovalent inorganic cation homeostasis	GO:0030004	1	0	106	119	1	27543	SLC9A9
GO:BP	cellular cation homeostasis	GO:0030003	1	0	494	119	3	27543	STIM1,SLC9A9,NUCB2
GO:BP	metal ion transport	GO:0030001	1	0	904	119	4	27543	STIM1,SLC9A9,CACNG5,AGTR1A
GO:BP	signal release	GO:0023061	1	0	563	119	3	27543	SMAD2,NUCB2,AGTR1A
GO:BP	negative regulation of signaling	GO:0023057	1	0	1375	119	5	27543	SMURF2,PLK2,GNAI3,GRID2,NUCB2
GO:BP	positive regulation of signaling	GO:0023056	1	0	1901	119	10	27543	DOK5,SMAD3,CACNG5,PLK2,SMAD2,FZD10,NUCB2,AGTR1A,CSNK1G3,MIR30D
GO:BP	signaling	GO:0023052	1	0	7473	119	49	27543	TIAM2,DOK5,PKN2,ARNT2,ZFAND6,VMN2R66,VMN2R67,VMN2R68,VMN2R69,VMN2R70,VMN2R71,VMN2R74,OLFR310,VMN2R77,VMN2R78,VMN2R79,DLG2,TENM4,OLFR547,OLFR566,OLFR575,OLFR605,OLFR624,SMAD3,SUSD5,TMEM100,SMURF2,CACNG5,PLK2,BOC,ARHGAP28,STK32A,SMAD2,PREX1,GNAI3,SYF2,IL22RA1,E2F2,FZD10,GRID2,NUCB2,IFT46,KMT2A,ARHGAP18,AGTR1A,CDH6,CSNK1G3,MIR30D,ARHGEF1
GO:BP	regulation of signaling	GO:0023051	1	0	3463	119	18	27543	DOK5,ZFAND6,SMAD3,TMEM100,SMURF2,CACNG5,PLK2,ARHGAP28,SMAD2,GNAI3,FZD10,GRID2,NUCB2,KMT2A,ARHGAP18,AGTR1A,CSNK1G3,MIR30D
GO:BP	cerebellum development	GO:0021549	1	0	119	119	2	27543	GRID2,ARCN1
GO:BP	signal transduction involved in regulation of gene expression	GO:0023019	1	0	26	119	2	27543	SMAD3,SMAD2
GO:BP	extracellular matrix disassembly	GO:0022617	1	0	34	119	1	27543	ADAMTS5
GO:BP	ribonucleoprotein complex biogenesis	GO:0022613	1	0	1557	119	2	27543	TFB1M,IMP3
GO:BP	gland morphogenesis	GO:0022612	1	0	144	119	1	27543	TET2
GO:BP	cellular component assembly	GO:0022607	1	0	3997	119	21	27543	PKN2,TENM4,RRM1,FEZ1,PEAK1,SMAD3,PDCD6IP,PLK2,ARHGAP28,DPYSL3,SMAD2,SYNE2,PDE4DIP,NCMAP,GRID2,EMP1,PHLDB1,IFT46,KMT2A,ARHGAP18,CDH6
GO:BP	regulation of cell morphogenesis	GO:0022604	1	0	329	119	2	27543	PREX1,ARHGAP18
GO:BP	regulation of anatomical structure morphogenesis	GO:0022603	1	0	961	119	11	27543	TIAM2,TMEM135,TENM4,STIM1,PKM,PLK2,PREX1,E2F2,PHLDB1,ARHGAP18,AGTR1A
GO:BP	reproductive process	GO:0022414	1	0	1828	119	4	27543	SMURF2,BPTF,ZFAT,DMRTC2
GO:BP	cellular process involved in reproduction in multicellular organism	GO:0022412	1	0	580	119	1	27543	DMRTC2
GO:BP	cellular component disassembly	GO:0022411	1	0	422	119	1	27543	ADAMTS5
GO:BP	membrane docking	GO:0022406	1	0	77	119	2	27543	SCFD2,EXOC2
GO:BP	cell cycle process	GO:0022402	1	0	1162	119	7	27543	PKN2,RRM1,PDCD6IP,PLK2,PDE4DIP,SYF2,DMRTC2
GO:BP	metencephalon development	GO:0022037	1	0	130	119	2	27543	GRID2,ARCN1
GO:BP	telencephalon glial cell migration	GO:0022030	1	0	26	119	1	27543	SYNE2
GO:BP	regulation of transmembrane transporter activity	GO:0022898	1	0	277	119	2	27543	STIM1,CACNG5
GO:BP	positive regulation of G2/M transition of mitotic cell cycle	GO:0010971	1	0	29	119	1	27543	RRM1
GO:BP	transport along microtubule	GO:0010970	1	0	155	119	4	27543	DLG2,FEZ1,SYNE2,IFT46
GO:BP	regulation of microtubule nucleation	GO:0010968	1	0	11	119	1	27543	PDE4DIP
GO:BP	macromolecule catabolic process	GO:0009057	1	0	1347	119	7	27543	ARIH1,SMAD3,PDCD6IP,SMURF2,PLK2,HNRNPR,LNX1
GO:BP	catabolic process	GO:0009056	1	0	2454	119	13	27543	TRIM21,FEZ1,ARIH1,PKM,SMAD3,PDCD6IP,GLB1,SMURF2,PLK2,GNAI3,TET2,HNRNPR,LNX1
GO:BP	lipid biosynthetic process	GO:0008610	1	0	682	119	1	27543	STARD4
GO:BP	visual learning	GO:0008542	1	0	66	119	1	27543	KMT2A
GO:BP	RNA splicing	GO:0008380	1	0	1557	119	2	27543	ZFP326,SYF2
GO:BP	axon ensheathment	GO:0008366	1	0	174	119	2	27543	TENM4,NCMAP
GO:BP	regulation of cell size	GO:0008361	1	0	206	119	1	27543	BARHL2
GO:BP	regulation of cell shape	GO:0008360	1	0	157	119	1	27543	ARHGAP18
GO:BP	glial cell migration	GO:0008347	1	0	61	119	1	27543	SYNE2
GO:BP	adult locomotory behavior	GO:0008344	1	0	97	119	2	27543	OXR1,ARCN1
GO:BP	determination of adult lifespan	GO:0008340	1	0	25	119	1	27543	TMEM135
GO:BP	endosome to lysosome transport	GO:0008333	1	0	56	119	1	27543	CACNG5
GO:BP	associative learning	GO:0008306	1	0	117	119	1	27543	KMT2A
GO:BP	insulin receptor signaling pathway	GO:0008286	1	0	128	119	1	27543	NUCB2
GO:BP	negative regulation of cell population proliferation	GO:0008285	1	0	736	119	3	27543	SMAD3,SMAD2,KMT2A
GO:BP	positive regulation of cell population proliferation	GO:0008284	1	0	1048	119	4	27543	ARNT2,GNAI3,SYF2,AGTR1A
GO:BP	cell population proliferation	GO:0008283	1	0	2109	119	8	27543	ARNT2,TENM4,SMAD3,SMAD2,GNAI3,SYF2,KMT2A,AGTR1A
GO:BP	cell death	GO:0008219	1	0	2208	119	15	27543	PKN2,ARNT2,ZFAND6,PKM,SMAD3,PDCD6IP,PLK2,OXR1,XKR7,GNAI3,E2F2,GRID2,EMP1,AGTR1A,ARHGEF1
GO:BP	regulation of blood pressure	GO:0008217	1	0	211	119	2	27543	SMAD3,AGTR1A
GO:BP	protein alkylation	GO:0008213	1	0	214	119	3	27543	TET2,KMT2A,DMRTC2
GO:BP	bile acid metabolic process	GO:0008206	1	0	44	119	1	27543	STARD4
GO:BP	steroid metabolic process	GO:0008202	1	0	325	119	2	27543	STARD4,AGTR1A
GO:BP	actin polymerization or depolymerization	GO:0008154	1	0	200	119	2	27543	ARHGAP28,ARHGAP18
GO:BP	metabolic process	GO:0008152	1	0	14679	119	52	27543	STARD4,BARHL2,TFB1M,PRSS39,PKN2,ZFP326,ARRDC4,ARNT2,TMEM135,ME3,RRM1,TRIM21,FEZ1,PEAK1,IMP3,LOXL1,ARIH1,PKM,SMAD3,PDCD6IP,GLB1,HLF,SMURF2,BPTF,PLK2,OXR1,STK32A,SMAD2,STKLD1,PREX1,GNAI3,TET2,SYF2,E2F2,ZFP46,HNRNPR,LNX1,FZD10,NUCB2,XYLT1,KMT2A,SIK3,APOC3,ZC3H12C,AGTR1A,TRMT12,ADAMTS5,CSNK1G3,CHSY3,ZFAT,MIR30D,DMRTC2
GO:BP	biological_process	GO:0008150	1	0	27538	119	119	27543	STARD4,BARHL2,TIAM2,TFB1M,PRSS39,DOK5,4930433B08RIK,STPG2,PKN2,A830019L24RIK,ZFP326,ARRDC4,ARNT2,ZFAND6,VMN2R66,VMN2R67,VMN2R68,VMN2R69,VMN2R70,VMN2R71,VMN2R74,OLFR310,VMN2R77,VMN2R78,VMN2R79,TMEM135,ME3,DLG2,TENM4,STIM1,RRM1,OLFR547,TRIM21,OLFR566,OLFR575,OLFR605,OLFR624,FEZ1,4931429L15RIK,PEAK1,IMP3,SCAMP2,LOXL1,1700072B07RIK,ARIH1,PKM,IQCH,SMAD3,SLC9A9,PDCD6IP,CLASP2,SUSD5,GLB1,TMEM100,HLF,SMU…
GO:BP	protein localization	GO:0008104	1	0	2493	119	15	27543	ARRDC4,ZFAND6,DLG2,SCAMP2,PDCD6IP,CACNG5,SMAD2,VPS45,SCFD2,GRID2,ARCN1,IFT46,AGTR1A,EXOC2,FAM91A1
GO:BP	retrograde axonal transport	GO:0008090	1	0	23	119	1	27543	DLG2
GO:BP	biosynthetic process	GO:0009058	1	0	5876	119	22	27543	STARD4,BARHL2,TFB1M,ZFP326,ARNT2,RRM1,TRIM21,PKM,SMAD3,HLF,BPTF,SMAD2,TET2,E2F2,ZFP46,HNRNPR,XYLT1,KMT2A,AGTR1A,CHSY3,ZFAT,DMRTC2
GO:BP	anterograde axonal transport	GO:0008089	1	0	48	119	2	27543	DLG2,FEZ1
GO:BP	macromolecule biosynthetic process	GO:0009059	1	0	4797	119	19	27543	BARHL2,TFB1M,ZFP326,ARNT2,TRIM21,PKM,SMAD3,HLF,BPTF,SMAD2,TET2,E2F2,ZFP46,HNRNPR,XYLT1,KMT2A,CHSY3,ZFAT,DMRTC2
GO:BP	glycoprotein biosynthetic process	GO:0009101	1	0	306	119	3	27543	TET2,XYLT1,CHSY3
GO:BP	response to radiation	GO:0009314	1	0	455	119	1	27543	KMT2A
GO:BP	amine biosynthetic process	GO:0009309	1	0	43	119	1	27543	AGTR1A
GO:BP	amine metabolic process	GO:0009308	1	0	122	119	1	27543	AGTR1A
GO:BP	protein secretion	GO:0009306	1	0	378	119	2	27543	SMAD2,AGTR1A
GO:BP	response to temperature stimulus	GO:0009266	1	0	190	119	1	27543	TMEM135
GO:BP	2'-deoxyribonucleotide biosynthetic process	GO:0009265	1	0	17	119	1	27543	RRM1
GO:BP	deoxyribonucleotide biosynthetic process	GO:0009263	1	0	17	119	1	27543	RRM1
GO:BP	deoxyribonucleotide metabolic process	GO:0009262	1	0	46	119	1	27543	RRM1
GO:BP	ribonucleotide biosynthetic process	GO:0009260	1	0	178	119	1	27543	PKM
GO:BP	ribonucleotide metabolic process	GO:0009259	1	0	390	119	2	27543	PKM,GNAI3
GO:BP	purine ribonucleoside triphosphate biosynthetic process	GO:0009206	1	0	72	119	1	27543	PKM
GO:BP	purine ribonucleoside triphosphate metabolic process	GO:0009205	1	0	90	119	2	27543	PKM,GNAI3
GO:BP	ribonucleoside triphosphate biosynthetic process	GO:0009201	1	0	78	119	1	27543	PKM
GO:BP	ribonucleoside triphosphate metabolic process	GO:0009199	1	0	98	119	2	27543	PKM,GNAI3
GO:BP	ribonucleoside diphosphate metabolic process	GO:0009185	1	0	116	119	2	27543	RRM1,PKM
GO:BP	purine ribonucleoside diphosphate metabolic process	GO:0009179	1	0	106	119	1	27543	PKM
GO:BP	nucleotide biosynthetic process	GO:0009165	1	0	239	119	2	27543	RRM1,PKM
GO:BP	purine ribonucleotide biosynthetic process	GO:0009152	1	0	164	119	1	27543	PKM
GO:BP	purine ribonucleotide metabolic process	GO:0009150	1	0	371	119	2	27543	PKM,GNAI3
GO:BP	purine nucleoside triphosphate biosynthetic process	GO:0009145	1	0	73	119	1	27543	PKM
GO:BP	purine nucleoside triphosphate metabolic process	GO:0009144	1	0	98	119	2	27543	PKM,GNAI3
GO:BP	nucleoside triphosphate biosynthetic process	GO:0009142	1	0	89	119	1	27543	PKM
GO:BP	nucleoside triphosphate metabolic process	GO:0009141	1	0	123	119	2	27543	PKM,GNAI3
GO:BP	purine nucleoside diphosphate metabolic process	GO:0009135	1	0	106	119	1	27543	PKM
GO:BP	nucleoside diphosphate metabolic process	GO:0009132	1	0	136	119	2	27543	RRM1,PKM
GO:BP	nucleotide metabolic process	GO:0009117	1	0	480	119	3	27543	RRM1,PKM,GNAI3
GO:BP	nucleobase metabolic process	GO:0009112	1	0	36	119	1	27543	TET2
GO:BP	glycoprotein metabolic process	GO:0009100	1	0	360	119	3	27543	TET2,XYLT1,CHSY3
GO:BP	axo-dendritic transport	GO:0008088	1	0	77	119	2	27543	DLG2,FEZ1
GO:BP	regulation of actin polymerization or depolymerization	GO:0008064	1	0	168	119	2	27543	ARHGAP28,ARHGAP18
GO:BP	neuron recognition	GO:0008038	1	0	45	119	1	27543	DSCAML1
GO:BP	axon guidance	GO:0007411	1	0	248	119	2	27543	BOC,DSCAML1
GO:BP	axonogenesis	GO:0007409	1	0	464	119	4	27543	BARHL2,TIAM2,BOC,DSCAML1
GO:BP	nervous system development	GO:0007399	1	0	2479	119	16	27543	BARHL2,TIAM2,DOK5,ARNT2,DLG2,TENM4,FEZ1,BPTF,PLK2,BOC,DPYSL3,SYNE2,NCMAP,GRID2,ARCN1,DSCAML1
GO:BP	pattern specification process	GO:0007389	1	0	452	119	4	27543	SMAD3,BPTF,SMAD2,KMT2A
GO:BP	gastrulation	GO:0007369	1	0	193	119	5	27543	TENM4,SMAD3,SMAD2,SYF2,PHLDB1
GO:BP	determination of left/right symmetry	GO:0007368	1	0	124	119	2	27543	SMAD3,SMAD2
GO:BP	zygotic specification of dorsal/ventral axis	GO:0007352	1	0	2	119	1	27543	SMAD2
GO:BP	regulation of mitotic cell cycle	GO:0007346	1	0	458	119	3	27543	PKN2,RRM1,SYF2
GO:BP	spermatid nucleus elongation	GO:0007290	1	0	4	119	1	27543	DMRTC2
GO:BP	spermatid nucleus differentiation	GO:0007289	1	0	29	119	1	27543	DMRTC2
GO:BP	spermatid development	GO:0007286	1	0	285	119	1	27543	DMRTC2
GO:BP	spermatogenesis	GO:0007283	1	0	682	119	1	27543	DMRTC2
GO:BP	germ cell development	GO:0007281	1	0	449	119	1	27543	DMRTC2
GO:BP	gamete generation	GO:0007276	1	0	944	119	1	27543	DMRTC2
GO:BP	multicellular organism development	GO:0007275	1	0	5045	119	32	27543	BARHL2,TIAM2,DOK5,ARNT2,VMN2R74,DLG2,TENM4,STIM1,FEZ1,LOXL1,PKM,SMAD3,TMEM100,SMURF2,BPTF,PLK2,BOC,DPYSL3,SMAD2,SYNE2,PREX1,TET2,SYF2,NCMAP,E2F2,GRID2,PHLDB1,ARCN1,KMT2A,DSCAML1,AGTR1A,ZFAT
GO:BP	ensheathment of neurons	GO:0007272	1	0	174	119	2	27543	TENM4,NCMAP
GO:BP	chemical synaptic transmission	GO:0007268	1	0	856	119	6	27543	DLG2,CACNG5,PLK2,GRID2,KMT2A,MIR30D
GO:BP	cell-cell signaling	GO:0007267	1	0	1690	119	12	27543	DLG2,SMAD3,CACNG5,PLK2,SMAD2,FZD10,GRID2,NUCB2,KMT2A,AGTR1A,CSNK1G3,MIR30D
GO:BP	Rho protein signal transduction	GO:0007266	1	0	129	119	1	27543	AGTR1A
GO:BP	Ras protein signal transduction	GO:0007265	1	0	336	119	2	27543	PLK2,AGTR1A
GO:BP	small GTPase mediated signal transduction	GO:0007264	1	0	433	119	6	27543	TIAM2,PLK2,ARHGAP28,NUCB2,ARHGAP18,AGTR1A
GO:BP	receptor signaling pathway via JAK-STAT	GO:0007259	1	0	195	119	1	27543	AGTR1A
GO:BP	JNK cascade	GO:0007254	1	0	170	119	1	27543	SMAD3
GO:BP	I-kappaB kinase/NF-kappaB signaling	GO:0007249	1	0	246	119	1	27543	ZFAND6
GO:BP	smoothened signaling pathway	GO:0007224	1	0	147	119	2	27543	BOC,IFT46
GO:BP	Notch signaling pathway	GO:0007219	1	0	178	119	3	27543	SUSD5,TMEM100,CDH6
GO:BP	glutamate receptor signaling pathway	GO:0007215	1	0	55	119	1	27543	GRID2
GO:BP	synapse assembly	GO:0007416	1	0	189	119	1	27543	GRID2
GO:BP	central nervous system development	GO:0007417	1	0	1031	119	8	27543	ARNT2,TENM4,FEZ1,BPTF,SYNE2,GRID2,ARCN1,DSCAML1
GO:BP	brain development	GO:0007420	1	0	763	119	7	27543	ARNT2,FEZ1,BPTF,SYNE2,GRID2,ARCN1,DSCAML1
GO:BP	peripheral nervous system development	GO:0007422	1	0	73	119	1	27543	NCMAP
GO:BP	cell recognition	GO:0008037	1	0	272	119	1	27543	DSCAML1
GO:BP	tRNA processing	GO:0008033	1	0	147	119	1	27543	TRMT12
GO:BP	blood circulation	GO:0008015	1	0	514	119	2	27543	SMAD3,AGTR1A
GO:BP	visual behavior	GO:0007632	1	0	69	119	1	27543	KMT2A
GO:BP	feeding behavior	GO:0007631	1	0	128	119	1	27543	AGTR1A
GO:BP	adult walking behavior	GO:0007628	1	0	38	119	1	27543	OXR1
GO:BP	locomotory behavior	GO:0007626	1	0	247	119	2	27543	OXR1,ARCN1
GO:BP	circadian rhythm	GO:0007623	1	0	237	119	1	27543	KMT2A
GO:BP	memory	GO:0007613	1	0	162	119	1	27543	PLK2
GO:BP	learning	GO:0007612	1	0	184	119	1	27543	KMT2A
GO:BP	learning or memory	GO:0007611	1	0	319	119	2	27543	PLK2,KMT2A
GO:BP	behavior	GO:0007610	1	0	741	119	5	27543	PLK2,OXR1,ARCN1,KMT2A,AGTR1A
GO:BP	sensory perception of smell	GO:0007608	1	0	1206	119	6	27543	OLFR310,OLFR547,OLFR566,OLFR575,OLFR605,OLFR624
GO:BP	2'-deoxyribonucleotide metabolic process	GO:0009394	1	0	45	119	1	27543	RRM1
GO:BP	sensory perception of chemical stimulus	GO:0007606	1	0	1518	119	6	27543	OLFR310,OLFR547,OLFR566,OLFR575,OLFR605,OLFR624
GO:BP	sensory perception	GO:0007600	1	0	2073	119	9	27543	OLFR310,DLG2,OLFR547,OLFR566,OLFR575,OLFR605,OLFR624,TMEM100,MIR30D
GO:BP	aging	GO:0007568	1	0	200	119	1	27543	AGTR1A
GO:BP	embryo implantation	GO:0007566	1	0	74	119	1	27543	SMURF2
GO:BP	female pregnancy	GO:0007565	1	0	229	119	1	27543	SMURF2
GO:BP	sex differentiation	GO:0007548	1	0	348	119	1	27543	DMRTC2
GO:BP	myoblast fusion	GO:0007520	1	0	50	119	1	27543	ADAMTS5
GO:BP	skeletal muscle tissue development	GO:0007519	1	0	196	119	1	27543	HLF
GO:BP	muscle organ development	GO:0007517	1	0	346	119	2	27543	SMAD3,HLF
GO:BP	heart development	GO:0007507	1	0	626	119	5	27543	TENM4,SMAD3,TMEM100,SMAD2,AGTR1A
GO:BP	mesoderm development	GO:0007498	1	0	117	119	2	27543	SMAD3,SMAD2
GO:BP	endoderm development	GO:0007492	1	0	88	119	3	27543	SMAD3,BPTF,SMAD2
GO:BP	foregut morphogenesis	GO:0007440	1	0	12	119	2	27543	SMAD3,SMAD2
GO:BP	sensory organ development	GO:0007423	1	0	627	119	1	27543	SMAD3
GO:BP	sensory perception of sound	GO:0007605	1	0	265	119	1	27543	MIR30D
GO:BP	response to cold	GO:0009409	1	0	57	119	1	27543	TMEM135
GO:BP	response to xenobiotic stimulus	GO:0009410	1	0	487	119	1	27543	ARNT2
GO:BP	response to light stimulus	GO:0009416	1	0	316	119	1	27543	KMT2A
GO:BP	negative regulation of muscle cell apoptotic process	GO:0010656	1	0	61	119	1	27543	AGTR1A
GO:BP	negative regulation of cell communication	GO:0010648	1	0	1371	119	5	27543	SMURF2,PLK2,GNAI3,GRID2,NUCB2
GO:BP	positive regulation of cell communication	GO:0010647	1	0	1895	119	10	27543	DOK5,SMAD3,CACNG5,PLK2,SMAD2,FZD10,NUCB2,AGTR1A,CSNK1G3,MIR30D
GO:BP	regulation of cell communication	GO:0010646	1	0	3453	119	18	27543	DOK5,ZFAND6,SMAD3,TMEM100,SMURF2,CACNG5,PLK2,ARHGAP28,SMAD2,GNAI3,FZD10,GRID2,NUCB2,KMT2A,ARHGAP18,AGTR1A,CSNK1G3,MIR30D
GO:BP	negative regulation of organelle organization	GO:0010639	1	0	360	119	2	27543	FEZ1,ARHGAP28
GO:BP	positive regulation of organelle organization	GO:0010638	1	0	514	119	3	27543	SMAD3,PDCD6IP,PDE4DIP
GO:BP	positive regulation of epithelial cell migration	GO:0010634	1	0	150	119	1	27543	PLK2
GO:BP	regulation of epithelial cell migration	GO:0010632	1	0	228	119	1	27543	PLK2
GO:BP	epithelial cell migration	GO:0010631	1	0	296	119	2	27543	PKN2,PLK2
GO:BP	negative regulation of gene expression	GO:0010629	1	0	1434	119	3	27543	SMAD2,HNRNPR,MIR30D
GO:BP	positive regulation of gene expression	GO:0010628	1	0	1217	119	6	27543	BARHL2,TMEM135,PKM,SMAD3,SMAD2,AGTR1A
GO:BP	negative regulation of cardiac muscle adaptation	GO:0010616	1	0	8	119	1	27543	SMAD3
GO:BP	negative regulation of cardiac muscle hypertrophy	GO:0010614	1	0	32	119	1	27543	SMAD3
GO:BP	regulation of cardiac muscle adaptation	GO:0010612	1	0	11	119	1	27543	SMAD3
GO:BP	regulation of cardiac muscle hypertrophy	GO:0010611	1	0	70	119	1	27543	SMAD3
GO:BP	post-transcriptional regulation of gene expression	GO:0010608	1	0	902	119	4	27543	BARHL2,PKM,HNRNPR,MIR30D
GO:BP	negative regulation of macromolecule metabolic process	GO:0010605	1	0	3339	119	9	27543	TRIM21,SMAD3,BPTF,OXR1,SMAD2,ZFP46,HNRNPR,KMT2A,MIR30D
GO:BP	positive regulation of macromolecule metabolic process	GO:0010604	1	0	3592	119	21	27543	BARHL2,ARRDC4,ARNT2,TMEM135,TRIM21,ARIH1,PKM,SMAD3,HLF,SMURF2,BPTF,PLK2,SMAD2,TET2,E2F2,HNRNPR,FZD10,KMT2A,AGTR1A,ZFAT,DMRTC2
GO:BP	positive regulation of endothelial cell migration	GO:0010595	1	0	107	119	1	27543	PLK2
GO:BP	regulation of endothelial cell migration	GO:0010594	1	0	171	119	1	27543	PLK2
GO:BP	regulation of cellular ketone metabolic process	GO:0010565	1	0	144	119	2	27543	STARD4,NUCB2
GO:BP	regulation of cell cycle process	GO:0010564	1	0	679	119	5	27543	PKN2,RRM1,PDCD6IP,PLK2,SYF2
GO:BP	positive regulation of phosphorus metabolic process	GO:0010562	1	0	939	119	3	27543	SMAD3,FZD10,AGTR1A
GO:BP	negative regulation of macromolecule biosynthetic process	GO:0010558	1	0	1613	119	5	27543	SMAD3,BPTF,SMAD2,ZFP46,HNRNPR
GO:BP	positive regulation of macromolecule biosynthetic process	GO:0010557	1	0	1911	119	12	27543	BARHL2,ARNT2,TRIM21,PKM,SMAD3,HLF,BPTF,SMAD2,TET2,E2F2,KMT2A,ZFAT
GO:BP	regulation of macromolecule biosynthetic process	GO:0010556	1	0	3953	119	16	27543	BARHL2,ZFP326,ARNT2,TRIM21,PKM,SMAD3,HLF,BPTF,SMAD2,TET2,E2F2,ZFP46,HNRNPR,KMT2A,ZFAT,DMRTC2
GO:BP	positive regulation of phospholipase activity	GO:0010518	1	0	50	119	1	27543	AGTR1A
GO:BP	muscle cell apoptotic process	GO:0010657	1	0	102	119	1	27543	AGTR1A
GO:BP	regulation of muscle cell apoptotic process	GO:0010660	1	0	96	119	1	27543	AGTR1A
GO:BP	regulation of alkaline phosphatase activity	GO:0010692	1	0	9	119	1	27543	SMAD3
GO:BP	positive regulation of alkaline phosphatase activity	GO:0010694	1	0	5	119	1	27543	SMAD3
GO:BP	regulation of metal ion transport	GO:0010959	1	0	428	119	2	27543	STIM1,AGTR1A
GO:BP	positive regulation of peptidase activity	GO:0010952	1	0	194	119	1	27543	SMAD3
GO:BP	positive regulation of endopeptidase activity	GO:0010950	1	0	176	119	1	27543	SMAD3
GO:BP	negative regulation of cell cycle process	GO:0010948	1	0	276	119	1	27543	SYF2
GO:BP	regulation of cell death	GO:0010941	1	0	1796	119	9	27543	ARNT2,ZFAND6,SMAD3,PLK2,OXR1,GNAI3,GRID2,AGTR1A,ARHGEF1
GO:BP	cellular component assembly involved in morphogenesis	GO:0010927	1	0	116	119	3	27543	TENM4,NCMAP,PHLDB1
GO:BP	positive regulation of phosphatase activity	GO:0010922	1	0	36	119	1	27543	SMAD3
GO:BP	regulation of phosphatase activity	GO:0010921	1	0	83	119	1	27543	SMAD3
GO:BP	positive regulation of mitochondrial membrane potential	GO:0010918	1	0	16	119	1	27543	TMEM135
GO:BP	positive regulation of steroid biosynthetic process	GO:0010893	1	0	29	119	1	27543	STARD4
GO:BP	positive regulation of lipid storage	GO:0010884	1	0	24	119	1	27543	TMEM135
GO:BP	regulation of lipid storage	GO:0010883	1	0	62	119	1	27543	TMEM135
GO:BP	cholesterol transport involved in cholesterol storage	GO:0010879	1	0	1	119	1	27543	STARD4
GO:BP	regulation of phospholipase activity	GO:0010517	1	0	59	119	1	27543	AGTR1A
GO:BP	cholesterol storage	GO:0010878	1	0	23	119	1	27543	STARD4
GO:BP	lipid localization	GO:0010876	1	0	490	119	6	27543	STARD4,TMEM135,XKR7,NUCB2,APOC3,AGTR1A
GO:BP	positive regulation of cholesterol esterification	GO:0010873	1	0	10	119	2	27543	STARD4,AGTR1A
GO:BP	regulation of cholesterol esterification	GO:0010872	1	0	13	119	2	27543	STARD4,AGTR1A
GO:BP	regulation of centrosome duplication	GO:0010824	1	0	48	119	2	27543	PDCD6IP,PLK2
GO:BP	regulation of mitochondrion organization	GO:0010821	1	0	141	119	1	27543	TMEM135
GO:BP	regulation of hormone levels	GO:0010817	1	0	582	119	3	27543	SMAD2,NUCB2,AGTR1A
GO:BP	positive regulation of cell-substrate adhesion	GO:0010811	1	0	136	119	2	27543	SMAD3,PREX1
GO:BP	regulation of cell-substrate adhesion	GO:0010810	1	0	223	119	3	27543	PEAK1,SMAD3,PREX1
GO:BP	positive regulation of cell morphogenesis involved in differentiation	GO:0010770	1	0	97	119	1	27543	PREX1
GO:BP	regulation of cell morphogenesis involved in differentiation	GO:0010769	1	0	114	119	1	27543	PREX1
GO:BP	positive regulation of cell development	GO:0010720	1	0	361	119	3	27543	TIAM2,TENM4,PREX1
GO:BP	positive regulation of epithelial to mesenchymal transition	GO:0010718	1	0	50	119	2	27543	SMAD3,SMAD2
GO:BP	regulation of epithelial to mesenchymal transition	GO:0010717	1	0	92	119	3	27543	SMAD3,SMAD2,PHLDB1
GO:BP	lipid transport involved in lipid storage	GO:0010877	1	0	2	119	1	27543	STARD4
GO:BP	nuclear migration along microfilament	GO:0031022	1	0	2	119	1	27543	SYNE2
GO:BP	positive regulation of autophagy	GO:0010508	1	0	145	119	3	27543	TRIM21,PLK2,GNAI3
GO:BP	regulation of autophagy	GO:0010506	1	0	273	119	4	27543	TRIM21,FEZ1,PLK2,GNAI3
GO:BP	regulation of biosynthetic process	GO:0009889	1	0	4220	119	17	27543	STARD4,BARHL2,ZFP326,ARNT2,TRIM21,PKM,SMAD3,HLF,BPTF,SMAD2,TET2,E2F2,ZFP46,HNRNPR,KMT2A,ZFAT,DMRTC2
GO:BP	tissue development	GO:0009888	1	0	2046	119	10	27543	TENM4,STIM1,SMAD3,TMEM100,HLF,BPTF,SMAD2,PHLDB1,AGTR1A,ZFAT
GO:BP	animal organ morphogenesis	GO:0009887	1	0	1082	119	8	27543	STIM1,SMAD3,TMEM100,SMAD2,TET2,DSCAML1,AGTR1A,ADAMTS5
GO:BP	embryonic pattern specification	GO:0009880	1	0	71	119	2	27543	SMAD3,SMAD2
GO:BP	determination of bilateral symmetry	GO:0009855	1	0	134	119	2	27543	SMAD3,SMAD2
GO:BP	specification of symmetry	GO:0009799	1	0	135	119	2	27543	SMAD3,SMAD2
GO:BP	axis specification	GO:0009798	1	0	88	119	1	27543	SMAD2
GO:BP	embryo development ending in birth or egg hatching	GO:0009792	1	0	804	119	8	27543	ARNT2,SMAD3,TMEM100,BPTF,SMAD2,SYF2,DSCAML1,ZFAT
GO:BP	post-embryonic development	GO:0009791	1	0	124	119	3	27543	SMAD2,TET2,KMT2A
GO:BP	embryo development	GO:0009790	1	0	1236	119	11	27543	ARNT2,TENM4,SMAD3,TMEM100,BPTF,SMAD2,SYF2,PHLDB1,KMT2A,DSCAML1,ZFAT
GO:BP	response to glucose	GO:0009749	1	0	232	119	1	27543	SMAD2
GO:BP	response to hexose	GO:0009746	1	0	237	119	1	27543	SMAD2
GO:BP	response to carbohydrate	GO:0009743	1	0	270	119	1	27543	SMAD2
GO:BP	response to hormone	GO:0009725	1	0	951	119	4	27543	PKM,GLB1,NUCB2,AGTR1A
GO:BP	response to endogenous stimulus	GO:0009719	1	0	1775	119	10	27543	PKM,SMAD3,GLB1,TMEM100,SMURF2,SMAD2,GNAI3,NUCB2,AGTR1A,MIR30D
GO:BP	catechol-containing compound biosynthetic process	GO:0009713	1	0	27	119	1	27543	AGTR1A
GO:BP	catechol-containing compound metabolic process	GO:0009712	1	0	60	119	1	27543	AGTR1A
GO:BP	response to salt stress	GO:0009651	1	0	50	119	1	27543	AGTR1A
GO:BP	response to toxic substance	GO:0009636	1	0	236	119	1	27543	ARNT2
GO:BP	response to abiotic stimulus	GO:0009628	1	0	1280	119	6	27543	ARNT2,TMEM135,SMAD3,KMT2A,AGTR1A,MIR30D
GO:BP	response to bacterium	GO:0009617	1	0	1031	119	4	27543	LOXL1,IL22RA1,ADAMTS5,MIR30D
GO:BP	response to virus	GO:0009615	1	0	378	119	2	27543	TRIM21,SMAD3
GO:BP	response to wounding	GO:0009611	1	0	553	119	3	27543	SMAD3,DPYSL3,SMAD2
GO:BP	response to biotic stimulus	GO:0009607	1	0	1780	119	6	27543	TRIM21,LOXL1,SMAD3,IL22RA1,ADAMTS5,MIR30D
GO:BP	response to external stimulus	GO:0009605	1	0	3104	119	13	27543	TMEM135,TRIM21,LOXL1,SMAD3,BOC,PREX1,IL22RA1,GRID2,NUCB2,DSCAML1,AGTR1A,ADAMTS5,MIR30D
GO:BP	detection of chemical stimulus	GO:0009593	1	0	1298	119	7	27543	OLFR310,STIM1,OLFR547,OLFR566,OLFR575,OLFR605,OLFR624
GO:BP	RNA modification	GO:0009451	1	0	158	119	2	27543	TFB1M,TRMT12
GO:BP	negative regulation of biosynthetic process	GO:0009890	1	0	1720	119	5	27543	SMAD3,BPTF,SMAD2,ZFP46,HNRNPR
GO:BP	positive regulation of biosynthetic process	GO:0009891	1	0	2080	119	13	27543	STARD4,BARHL2,ARNT2,TRIM21,PKM,SMAD3,HLF,BPTF,SMAD2,TET2,E2F2,KMT2A,ZFAT
GO:BP	negative regulation of metabolic process	GO:0009892	1	0	3558	119	12	27543	TRIM21,FEZ1,SMAD3,BPTF,PLK2,OXR1,SMAD2,ZFP46,HNRNPR,KMT2A,ADAMTS5,MIR30D
GO:BP	positive regulation of metabolic process	GO:0009893	1	0	3908	119	24	27543	STARD4,BARHL2,ARRDC4,ARNT2,TMEM135,TRIM21,ARIH1,PKM,SMAD3,HLF,SMURF2,BPTF,PLK2,SMAD2,GNAI3,TET2,E2F2,HNRNPR,FZD10,NUCB2,KMT2A,AGTR1A,ZFAT,DMRTC2
GO:BP	proteasomal protein catabolic process	GO:0010498	1	0	503	119	3	27543	ARIH1,SMURF2,PLK2
GO:BP	regulation of gastrulation	GO:0010470	1	0	17	119	2	27543	TENM4,PHLDB1
GO:BP	regulation of signaling receptor activity	GO:0010469	1	0	169	119	1	27543	CACNG5
GO:BP	regulation of gene expression	GO:0010468	1	0	5415	119	19	27543	BARHL2,ZFP326,ARNT2,TMEM135,TRIM21,PKM,SMAD3,HLF,BPTF,SMAD2,TET2,E2F2,ZFP46,HNRNPR,KMT2A,AGTR1A,ZFAT,MIR30D,DMRTC2
GO:BP	gene expression	GO:0010467	1	0	9258	119	23	27543	BARHL2,TFB1M,ZFP326,ARNT2,TMEM135,TRIM21,IMP3,PKM,SMAD3,HLF,BPTF,SMAD2,TET2,SYF2,E2F2,ZFP46,HNRNPR,KMT2A,AGTR1A,TRMT12,ZFAT,MIR30D,DMRTC2
GO:BP	regulation of G2/M transition of mitotic cell cycle	GO:0010389	1	0	100	119	2	27543	RRM1,SYF2
GO:BP	membrane invagination	GO:0010324	1	0	194	119	1	27543	XKR7
GO:BP	multicellular organism aging	GO:0010259	1	0	31	119	1	27543	AGTR1A
GO:BP	endomembrane system organization	GO:0010256	1	0	502	119	2	27543	XKR7,PDE4DIP
GO:BP	response to organonitrogen compound	GO:0010243	1	0	1189	119	5	27543	PKM,GNAI3,NUCB2,AGTR1A,MIR30D
GO:BP	embryonic body morphogenesis	GO:0010172	1	0	12	119	1	27543	PHLDB1
GO:BP	body morphogenesis	GO:0010171	1	0	54	119	1	27543	PHLDB1
GO:BP	response to metal ion	GO:0010038	1	0	376	119	3	27543	DLG2,STIM1,KMT2A
GO:BP	negative regulation of autophagy	GO:0010507	1	0	72	119	1	27543	FEZ1
GO:BP	response to inorganic substance	GO:0010035	1	0	653	119	3	27543	DLG2,STIM1,KMT2A
GO:BP	glial cell differentiation	GO:0010001	1	0	250	119	2	27543	TENM4,NCMAP
GO:BP	response to extracellular stimulus	GO:0009991	1	0	569	119	2	27543	TMEM135,NUCB2
GO:BP	cellular process	GO:0009987	1	0	21177	119	100	27543	STARD4,BARHL2,TIAM2,TFB1M,DOK5,PKN2,ZFP326,ARRDC4,ARNT2,ZFAND6,VMN2R66,VMN2R67,VMN2R68,VMN2R69,VMN2R70,VMN2R71,VMN2R74,OLFR310,VMN2R77,VMN2R78,VMN2R79,TMEM135,ME3,DLG2,TENM4,STIM1,RRM1,OLFR547,TRIM21,OLFR566,OLFR575,OLFR605,OLFR624,FEZ1,PEAK1,IMP3,LOXL1,ARIH1,PKM,SMAD3,SLC9A9,PDCD6IP,CLASP2,SUSD5,GLB1,TMEM100,HLF,SMURF2,BPTF,CACNG5,PLK2,OXR1,BOC,ARHGAP28,STK32A,DPYSL3,SMAD2,CHCHD6,SYNE2,STKLD1,XK…
GO:BP	negative regulation of signal transduction	GO:0009968	1	0	1231	119	3	27543	SMURF2,GNAI3,NUCB2
GO:BP	positive regulation of signal transduction	GO:0009967	1	0	1537	119	6	27543	DOK5,SMAD3,SMAD2,FZD10,AGTR1A,CSNK1G3
GO:BP	regulation of signal transduction	GO:0009966	1	0	2898	119	14	27543	DOK5,ZFAND6,SMAD3,TMEM100,SMURF2,CACNG5,ARHGAP28,SMAD2,GNAI3,FZD10,NUCB2,ARHGAP18,AGTR1A,CSNK1G3
GO:BP	dorsal/ventral pattern formation	GO:0009953	1	0	97	119	1	27543	SMAD2
GO:BP	anterior/posterior pattern specification	GO:0009952	1	0	214	119	4	27543	SMAD3,BPTF,SMAD2,KMT2A
GO:BP	dorsal/ventral axis specification	GO:0009950	1	0	12	119	1	27543	SMAD2
GO:BP	hormone transport	GO:0009914	1	0	373	119	3	27543	SMAD2,NUCB2,AGTR1A
GO:BP	positive regulation of catabolic process	GO:0009896	1	0	511	119	6	27543	TRIM21,ARIH1,SMURF2,PLK2,GNAI3,HNRNPR
GO:BP	negative regulation of catabolic process	GO:0009895	1	0	314	119	2	27543	FEZ1,SMAD3
GO:BP	regulation of catabolic process	GO:0009894	1	0	936	119	8	27543	TRIM21,FEZ1,ARIH1,SMAD3,SMURF2,PLK2,GNAI3,HNRNPR
GO:BP	response to organic substance	GO:0010033	1	0	3750	119	17	27543	DOK5,ZFAND6,TRIM21,FEZ1,LOXL1,PKM,SMAD3,GLB1,TMEM100,SMURF2,DPYSL3,SMAD2,GNAI3,IL22RA1,NUCB2,AGTR1A,MIR30D
GO:BP	dopamine receptor signaling pathway	GO:0007212	1	0	37	119	1	27543	GNAI3
GO:BP	microtubule organizing center organization	GO:0031023	1	0	144	119	2	27543	PDCD6IP,PLK2
GO:BP	gene silencing by RNA	GO:0031047	1	0	526	119	1	27543	MIR30D
GO:BP	positive regulation of GTPase activity	GO:0043547	1	0	250	119	3	27543	TIAM2,PREX1,FZD10
GO:BP	protein acylation	GO:0043543	1	0	270	119	1	27543	KMT2A
GO:BP	endothelial cell migration	GO:0043542	1	0	220	119	1	27543	PLK2
GO:BP	positive regulation of blood vessel endothelial cell migration	GO:0043536	1	0	55	119	1	27543	PLK2
GO:BP	regulation of blood vessel endothelial cell migration	GO:0043535	1	0	89	119	1	27543	PLK2
GO:BP	blood vessel endothelial cell migration	GO:0043534	1	0	112	119	1	27543	PLK2
GO:BP	negative regulation of neuron apoptotic process	GO:0043524	1	0	184	119	1	27543	OXR1
GO:BP	regulation of neuron apoptotic process	GO:0043523	1	0	269	119	2	27543	OXR1,GRID2
GO:BP	positive regulation of JUN kinase activity	GO:0043507	1	0	53	119	1	27543	FZD10
GO:BP	regulation of JUN kinase activity	GO:0043506	1	0	69	119	1	27543	FZD10
GO:BP	regulation of muscle adaptation	GO:0043502	1	0	97	119	1	27543	SMAD3
GO:BP	muscle adaptation	GO:0043500	1	0	125	119	1	27543	SMAD3
GO:BP	protein kinase B signaling	GO:0043491	1	0	212	119	1	27543	TMEM100
GO:BP	regulation of mRNA stability	GO:0043488	1	0	155	119	1	27543	HNRNPR
GO:BP	regulation of RNA stability	GO:0043487	1	0	168	119	1	27543	HNRNPR
GO:BP	regulation of RNA splicing	GO:0043484	1	0	164	119	1	27543	ZFP326
GO:BP	pigmentation	GO:0043473	1	0	94	119	1	27543	ARCN1
GO:BP	oxoacid metabolic process	GO:0043436	1	0	955	119	4	27543	STARD4,ME3,PKM,NUCB2
GO:BP	response to peptide hormone	GO:0043434	1	0	444	119	3	27543	PKM,NUCB2,AGTR1A
GO:BP	negative regulation of DNA-binding transcription factor activity	GO:0043433	1	0	162	119	1	27543	TRIM21
GO:BP	macromolecule methylation	GO:0043414	1	0	335	119	5	27543	TFB1M,TET2,KMT2A,TRMT12,DMRTC2
GO:BP	macromolecule glycosylation	GO:0043413	1	0	226	119	1	27543	TET2
GO:BP	macromolecule modification	GO:0043412	1	0	3898	119	22	27543	TFB1M,PKN2,ARRDC4,TRIM21,PEAK1,LOXL1,ARIH1,SMURF2,PLK2,OXR1,STK32A,SMAD2,STKLD1,TET2,LNX1,FZD10,KMT2A,SIK3,AGTR1A,TRMT12,CSNK1G3,DMRTC2
GO:BP	positive regulation of MAPK cascade	GO:0043410	1	0	513	119	2	27543	DOK5,FZD10
GO:BP	regulation of MAPK cascade	GO:0043408	1	0	712	119	2	27543	DOK5,FZD10
GO:BP	positive regulation of MAP kinase activity	GO:0043406	1	0	125	119	1	27543	FZD10
GO:BP	regulation of MAP kinase activity	GO:0043405	1	0	190	119	1	27543	FZD10
GO:BP	regulation of kinase activity	GO:0043549	1	0	748	119	2	27543	FZD10,AGTR1A
GO:BP	skeletal muscle tissue regeneration	GO:0043403	1	0	51	119	1	27543	PKM
GO:BP	peroxisomal transport	GO:0043574	1	0	21	119	1	27543	ZFAND6
GO:BP	amide biosynthetic process	GO:0043604	1	0	857	119	3	27543	BARHL2,PKM,HNRNPR
GO:BP	cellular catabolic process	GO:0044248	1	0	2111	119	10	27543	TRIM21,FEZ1,ARIH1,PDCD6IP,SMURF2,PLK2,GNAI3,TET2,HNRNPR,LNX1
GO:BP	primary metabolic process	GO:0044238	1	0	13120	119	47	27543	STARD4,BARHL2,TFB1M,PRSS39,PKN2,ZFP326,ARRDC4,ARNT2,RRM1,TRIM21,PEAK1,IMP3,LOXL1,ARIH1,PKM,SMAD3,PDCD6IP,GLB1,HLF,SMURF2,BPTF,PLK2,OXR1,STK32A,SMAD2,STKLD1,GNAI3,TET2,SYF2,E2F2,ZFP46,HNRNPR,LNX1,FZD10,NUCB2,XYLT1,KMT2A,SIK3,APOC3,ZC3H12C,AGTR1A,TRMT12,ADAMTS5,CSNK1G3,CHSY3,ZFAT,DMRTC2
GO:BP	cellular metabolic process	GO:0044237	1	0	13166	119	47	27543	STARD4,BARHL2,TFB1M,PKN2,ZFP326,ARRDC4,ARNT2,ME3,RRM1,TRIM21,FEZ1,PEAK1,IMP3,LOXL1,ARIH1,PKM,SMAD3,PDCD6IP,GLB1,HLF,SMURF2,BPTF,PLK2,OXR1,STK32A,SMAD2,STKLD1,PREX1,GNAI3,TET2,SYF2,E2F2,ZFP46,HNRNPR,LNX1,FZD10,NUCB2,XYLT1,KMT2A,SIK3,ZC3H12C,AGTR1A,TRMT12,CSNK1G3,CHSY3,ZFAT,DMRTC2
GO:BP	histone H3-K14 acetylation	GO:0044154	1	0	23	119	1	27543	KMT2A
GO:BP	cellular amine metabolic process	GO:0044106	1	0	116	119	1	27543	AGTR1A
GO:BP	positive regulation of molecular function	GO:0044093	1	0	1533	119	11	27543	TIAM2,ARRDC4,STIM1,TRIM21,SMAD3,PLK2,PREX1,GNAI3,FZD10,KMT2A,AGTR1A
GO:BP	negative regulation of molecular function	GO:0044092	1	0	1136	119	4	27543	TRIM21,ARHGAP28,HNRNPR,FZD10
GO:BP	positive regulation of cellular component biogenesis	GO:0044089	1	0	521	119	6	27543	SMAD3,PDCD6IP,DPYSL3,PDE4DIP,GRID2,PHLDB1
GO:BP	regulation of vacuole organization	GO:0044088	1	0	44	119	1	27543	FEZ1
GO:BP	cellular component biogenesis	GO:0044085	1	0	4239	119	24	27543	TFB1M,PKN2,ARRDC4,TENM4,RRM1,FEZ1,PEAK1,IMP3,SMAD3,PDCD6IP,PLK2,ARHGAP28,DPYSL3,SMAD2,SYNE2,PDE4DIP,NCMAP,GRID2,EMP1,PHLDB1,IFT46,KMT2A,ARHGAP18,CDH6
GO:BP	regulation of endocrine process	GO:0044060	1	0	56	119	1	27543	AGTR1A
GO:BP	regulation of system process	GO:0044057	1	0	627	119	6	27543	TENM4,SMAD3,TMEM100,CACNG5,NCMAP,AGTR1A
GO:BP	regulation of DNA methylation	GO:0044030	1	0	31	119	1	27543	KMT2A
GO:BP	histone H4-K16 acetylation	GO:0043984	1	0	22	119	1	27543	KMT2A
GO:BP	histone H3-K27 acetylation	GO:0043974	1	0	6	119	1	27543	KMT2A
GO:BP	histone H3-K9 acetylation	GO:0043970	1	0	16	119	1	27543	KMT2A
GO:BP	histone H4 acetylation	GO:0043967	1	0	76	119	1	27543	KMT2A
GO:BP	histone H3 acetylation	GO:0043966	1	0	79	119	1	27543	KMT2A
GO:BP	cellular component maintenance	GO:0043954	1	0	82	119	1	27543	DLG2
GO:BP	negative regulation of cAMP-mediated signaling	GO:0043951	1	0	15	119	1	27543	NUCB2
GO:BP	regulation of cAMP-mediated signaling	GO:0043949	1	0	47	119	1	27543	NUCB2
GO:BP	protein-containing complex organization	GO:0043933	1	0	2811	119	8	27543	RRM1,SMAD3,PDCD6IP,ARHGAP28,SMAD2,PDE4DIP,KMT2A,ARHGAP18
GO:BP	regulation of biological process involved in symbiotic interaction	GO:0043903	1	0	65	119	2	27543	TRIM21,EXOC2
GO:BP	engulfment of apoptotic cell	GO:0043652	1	0	19	119	1	27543	XKR7
GO:BP	dicarboxylic acid metabolic process	GO:0043648	1	0	91	119	1	27543	ME3
GO:BP	modification-dependent macromolecule catabolic process	GO:0043632	1	0	659	119	4	27543	ARIH1,SMURF2,PLK2,LNX1
GO:BP	response to estrogen	GO:0043627	1	0	124	119	1	27543	AGTR1A
GO:BP	cellular amide metabolic process	GO:0043603	1	0	1170	119	3	27543	BARHL2,PKM,HNRNPR
GO:BP	regulation of protein binding	GO:0043393	1	0	213	119	2	27543	TRIM21,PLK2
GO:BP	apical junction assembly	GO:0043297	1	0	90	119	2	27543	PKN2,PDCD6IP
GO:BP	regulation of cysteine-type endopeptidase activity involved in apoptotic process	GO:0043281	1	0	226	119	1	27543	SMAD3
GO:BP	homeostatic process	GO:0042592	1	0	1732	119	7	27543	STIM1,SLC9A9,TET2,NUCB2,KMT2A,AGTR1A,ADAMTS5
GO:BP	superoxide anion generation	GO:0042554	1	0	45	119	2	27543	GNAI3,AGTR1A
GO:BP	myelination	GO:0042552	1	0	171	119	2	27543	TENM4,NCMAP
GO:BP	neuron maturation	GO:0042551	1	0	58	119	1	27543	DLG2
GO:BP	odontogenesis	GO:0042476	1	0	132	119	2	27543	STIM1,ADAMTS5
GO:BP	odontogenesis of dentin-containing tooth	GO:0042475	1	0	95	119	1	27543	STIM1
GO:BP	catecholamine biosynthetic process	GO:0042423	1	0	27	119	1	27543	AGTR1A
GO:BP	dopamine metabolic process	GO:0042417	1	0	43	119	1	27543	AGTR1A
GO:BP	dopamine biosynthetic process	GO:0042416	1	0	16	119	1	27543	AGTR1A
GO:BP	cristae formation	GO:0042407	1	0	18	119	1	27543	CHCHD6
GO:BP	cellular biogenic amine biosynthetic process	GO:0042401	1	0	43	119	1	27543	AGTR1A
GO:BP	regulation of membrane potential	GO:0042391	1	0	465	119	3	27543	TMEM135,GRID2,KMT2A
GO:BP	taxis	GO:0042330	1	0	619	119	5	27543	SMAD3,BOC,PREX1,DSCAML1,AGTR1A
GO:BP	positive regulation of phosphorylation	GO:0042327	1	0	853	119	2	27543	FZD10,AGTR1A
GO:BP	regulation of phosphorylation	GO:0042325	1	0	1284	119	2	27543	FZD10,AGTR1A
GO:BP	vasoconstriction	GO:0042310	1	0	104	119	1	27543	AGTR1A
GO:BP	ribosome biogenesis	GO:0042254	1	0	295	119	2	27543	TFB1M,IMP3
GO:BP	tissue regeneration	GO:0042246	1	0	80	119	1	27543	PKM
GO:BP	response to chemical	GO:0042221	1	0	5880	119	32	27543	DOK5,ARNT2,ZFAND6,OLFR310,TMEM135,DLG2,STIM1,OLFR547,TRIM21,OLFR566,OLFR575,OLFR605,OLFR624,FEZ1,LOXL1,PKM,SMAD3,GLB1,TMEM100,SMURF2,OXR1,BOC,DPYSL3,SMAD2,PREX1,GNAI3,IL22RA1,NUCB2,KMT2A,DSCAML1,AGTR1A,MIR30D
GO:BP	cellular ketone metabolic process	GO:0042180	1	0	233	119	2	27543	STARD4,NUCB2
GO:BP	negative regulation of protein catabolic process	GO:0042177	1	0	121	119	1	27543	SMAD3
GO:BP	regulation of protein catabolic process	GO:0042176	1	0	393	119	4	27543	ARIH1,SMAD3,SMURF2,PLK2
GO:BP	lipoprotein metabolic process	GO:0042157	1	0	147	119	1	27543	APOC3
GO:BP	regulation of cell population proliferation	GO:0042127	1	0	1764	119	7	27543	ARNT2,SMAD3,SMAD2,GNAI3,SYF2,KMT2A,AGTR1A
GO:BP	T cell activation	GO:0042110	1	0	527	119	2	27543	SMAD3,PREX1
GO:BP	intraciliary transport	GO:0042073	1	0	43	119	1	27543	IFT46
GO:BP	gliogenesis	GO:0042063	1	0	341	119	3	27543	TENM4,SYNE2,NCMAP
GO:BP	muscle cell differentiation	GO:0042692	1	0	409	119	2	27543	STIM1,ADAMTS5
GO:BP	defense response to bacterium	GO:0042742	1	0	454	119	2	27543	IL22RA1,ADAMTS5
GO:BP	drinking behavior	GO:0042756	1	0	17	119	1	27543	AGTR1A
GO:BP	obsolete nucleosome mobilization	GO:0042766	1	0	19	119	1	27543	BPTF
GO:BP	positive regulation of cysteine-type endopeptidase activity involved in apoptotic process	GO:0043280	1	0	129	119	1	27543	SMAD3
GO:BP	apoptotic cell clearance	GO:0043277	1	0	48	119	1	27543	XKR7
GO:BP	positive regulation of ion transport	GO:0043270	1	0	312	119	2	27543	STIM1,AGTR1A
GO:BP	regulation of ion transport	GO:0043269	1	0	723	119	3	27543	STIM1,CACNG5,AGTR1A
GO:BP	regulation of protein-containing complex assembly	GO:0043254	1	0	425	119	3	27543	ARHGAP28,PDE4DIP,ARHGAP18
GO:BP	response to external biotic stimulus	GO:0043207	1	0	1738	119	6	27543	TRIM21,LOXL1,SMAD3,IL22RA1,ADAMTS5,MIR30D
GO:BP	response to amino acid	GO:0043200	1	0	223	119	1	27543	MIR30D
GO:BP	macromolecule metabolic process	GO:0043170	1	0	12692	119	46	27543	BARHL2,TFB1M,PRSS39,PKN2,ZFP326,ARRDC4,ARNT2,TMEM135,RRM1,TRIM21,PEAK1,IMP3,LOXL1,ARIH1,PKM,SMAD3,PDCD6IP,HLF,SMURF2,BPTF,PLK2,OXR1,STK32A,SMAD2,STKLD1,TET2,SYF2,E2F2,ZFP46,HNRNPR,LNX1,FZD10,NUCB2,XYLT1,KMT2A,SIK3,APOC3,ZC3H12C,AGTR1A,TRMT12,ADAMTS5,CSNK1G3,CHSY3,ZFAT,MIR30D,DMRTC2
GO:BP	proteasome-mediated ubiquitin-dependent protein catabolic process	GO:0043161	1	0	422	119	3	27543	ARIH1,SMURF2,PLK2
GO:BP	stress fiber assembly	GO:0043149	1	0	114	119	2	27543	SMAD3,ARHGAP28
GO:BP	regulation of I-kappaB kinase/NF-kappaB signaling	GO:0043122	1	0	210	119	1	27543	ZFAND6
GO:BP	receptor clustering	GO:0043113	1	0	72	119	1	27543	DLG2
GO:BP	receptor metabolic process	GO:0043112	1	0	71	119	1	27543	AGTR1A
GO:BP	cellular biosynthetic process	GO:0044249	1	0	5701	119	22	27543	STARD4,BARHL2,TFB1M,ZFP326,ARNT2,RRM1,TRIM21,PKM,SMAD3,HLF,BPTF,SMAD2,TET2,E2F2,ZFP46,HNRNPR,XYLT1,KMT2A,AGTR1A,CHSY3,ZFAT,DMRTC2
GO:BP	regulation of GTPase activity	GO:0043087	1	0	346	119	3	27543	TIAM2,PREX1,FZD10
GO:BP	positive regulation of catalytic activity	GO:0043085	1	0	1126	119	8	27543	TIAM2,ARRDC4,STIM1,SMAD3,PREX1,GNAI3,FZD10,AGTR1A
GO:BP	negative regulation of programmed cell death	GO:0043069	1	0	1053	119	7	27543	ARNT2,ZFAND6,SMAD3,PLK2,OXR1,GNAI3,AGTR1A
GO:BP	regulation of programmed cell death	GO:0043067	1	0	1629	119	8	27543	ARNT2,ZFAND6,SMAD3,PLK2,OXR1,GNAI3,GRID2,AGTR1A
GO:BP	negative regulation of apoptotic process	GO:0043066	1	0	1030	119	7	27543	ARNT2,ZFAND6,SMAD3,PLK2,OXR1,GNAI3,AGTR1A
GO:BP	extracellular structure organization	GO:0043062	1	0	298	119	3	27543	SMAD3,PHLDB1,ADAMTS5
GO:BP	peptide biosynthetic process	GO:0043043	1	0	739	119	3	27543	BARHL2,PKM,HNRNPR
GO:BP	camera-type eye development	GO:0043010	1	0	362	119	1	27543	SMAD3
GO:BP	chordate embryonic development	GO:0043009	1	0	788	119	8	27543	ARNT2,SMAD3,TMEM100,BPTF,SMAD2,SYF2,DSCAML1,ZFAT
GO:BP	regulation of apoptotic process	GO:0042981	1	0	1597	119	8	27543	ARNT2,ZFAND6,SMAD3,PLK2,OXR1,GNAI3,GRID2,AGTR1A
GO:BP	activation of Janus kinase activity	GO:0042976	1	0	15	119	1	27543	AGTR1A
GO:BP	amide transport	GO:0042886	1	0	349	119	2	27543	SMAD2,NUCB2
GO:BP	pyruvate biosynthetic process	GO:0042866	1	0	6	119	1	27543	PKM
GO:BP	signal transduction in response to DNA damage	GO:0042770	1	0	169	119	1	27543	SYF2
GO:BP	negative regulation of catalytic activity	GO:0043086	1	0	776	119	2	27543	HNRNPR,FZD10
GO:BP	wound healing	GO:0042060	1	0	391	119	2	27543	SMAD3,SMAD2
GO:BP	cellular lipid metabolic process	GO:0044255	1	0	1037	119	3	27543	STARD4,NUCB2,AGTR1A
GO:BP	cellular macromolecule metabolic process	GO:0044260	1	0	5820	119	30	27543	BARHL2,TFB1M,PKN2,ARRDC4,RRM1,TRIM21,PEAK1,LOXL1,ARIH1,PKM,SMAD3,PDCD6IP,SMURF2,PLK2,OXR1,STK32A,SMAD2,STKLD1,TET2,HNRNPR,LNX1,FZD10,XYLT1,KMT2A,SIK3,AGTR1A,TRMT12,CSNK1G3,CHSY3,DMRTC2
GO:BP	positive regulation of phosphate metabolic process	GO:0045937	1	0	939	119	3	27543	SMAD3,FZD10,AGTR1A
GO:BP	positive regulation of nucleobase-containing compound metabolic process	GO:0045935	1	0	2049	119	12	27543	BARHL2,ARNT2,TRIM21,SMAD3,HLF,BPTF,SMAD2,TET2,E2F2,HNRNPR,KMT2A,ZFAT
GO:BP	negative regulation of nucleobase-containing compound metabolic process	GO:0045934	1	0	1620	119	5	27543	SMAD3,BPTF,SMAD2,ZFP46,KMT2A
GO:BP	positive regulation of mitotic cell cycle	GO:0045931	1	0	129	119	2	27543	PKN2,RRM1
GO:BP	negative regulation of mitotic cell cycle	GO:0045930	1	0	219	119	1	27543	SYF2
GO:BP	negative regulation of growth	GO:0045926	1	0	258	119	1	27543	SMAD3
GO:BP	positive regulation of fatty acid metabolic process	GO:0045923	1	0	46	119	1	27543	NUCB2
GO:BP	positive regulation of exocytosis	GO:0045921	1	0	101	119	2	27543	PDCD6IP,EXOC2
GO:BP	positive regulation of transcription, DNA-templated	GO:0045893	1	0	1688	119	11	27543	BARHL2,ARNT2,TRIM21,SMAD3,HLF,BPTF,SMAD2,TET2,E2F2,KMT2A,ZFAT
GO:BP	negative regulation of transcription, DNA-templated	GO:0045892	1	0	1375	119	4	27543	SMAD3,BPTF,SMAD2,ZFP46
GO:BP	positive regulation of proteolysis	GO:0045862	1	0	370	119	3	27543	ARIH1,SMAD3,PLK2
GO:BP	negative regulation of proteolysis	GO:0045861	1	0	388	119	1	27543	TRIM21
GO:BP	positive regulation of protein kinase activity	GO:0045860	1	0	412	119	2	27543	FZD10,AGTR1A
GO:BP	regulation of protein kinase activity	GO:0045859	1	0	642	119	2	27543	FZD10,AGTR1A
GO:BP	positive regulation of membrane potential	GO:0045838	1	0	25	119	1	27543	TMEM135
GO:BP	positive regulation of lipid metabolic process	GO:0045834	1	0	190	119	3	27543	STARD4,NUCB2,AGTR1A
GO:BP	negative regulation of innate immune response	GO:0045824	1	0	82	119	1	27543	TRIM21
GO:BP	positive regulation of cell cycle	GO:0045787	1	0	352	119	3	27543	PKN2,RRM1,TRIM21
GO:BP	negative regulation of cell cycle	GO:0045786	1	0	357	119	1	27543	SYF2
GO:BP	positive regulation of cell adhesion	GO:0045785	1	0	461	119	2	27543	SMAD3,PREX1
GO:BP	positive regulation of ossification	GO:0045778	1	0	56	119	1	27543	SMAD3
GO:BP	positive regulation of blood pressure	GO:0045777	1	0	51	119	1	27543	AGTR1A
GO:BP	positive regulation of angiogenesis	GO:0045766	1	0	180	119	3	27543	STIM1,PKM,AGTR1A
GO:BP	regulation of angiogenesis	GO:0045765	1	0	305	119	5	27543	STIM1,PKM,PLK2,E2F2,AGTR1A
GO:BP	positive regulation of adenylate cyclase activity	GO:0045762	1	0	30	119	1	27543	STIM1
GO:BP	regulation of adenylate cyclase activity	GO:0045761	1	0	48	119	1	27543	STIM1
GO:BP	positive regulation of protein catabolic process	GO:0045732	1	0	223	119	3	27543	ARIH1,SMURF2,PLK2
GO:BP	positive regulation of steroid metabolic process	GO:0045940	1	0	45	119	2	27543	STARD4,AGTR1A
GO:BP	positive regulation of translation	GO:0045727	1	0	143	119	2	27543	BARHL2,PKM
GO:BP	positive regulation of transcription by RNA polymerase II	GO:0045944	1	0	1284	119	10	27543	BARHL2,ARNT2,SMAD3,HLF,BPTF,SMAD2,TET2,E2F2,KMT2A,ZFAT
GO:BP	ADP metabolic process	GO:0046031	1	0	97	119	1	27543	PKM
GO:BP	filopodium assembly	GO:0046847	1	0	74	119	1	27543	DPYSL3
GO:BP	microtubule polymerization	GO:0046785	1	0	83	119	1	27543	PDE4DIP
GO:BP	regulation of viral transcription	GO:0046782	1	0	21	119	1	27543	TRIM21
GO:BP	protein autophosphorylation	GO:0046777	1	0	238	119	2	27543	PEAK1,CSNK1G3
GO:BP	viral budding	GO:0046755	1	0	20	119	1	27543	PDCD6IP
GO:BP	viral entry into host cell	GO:0046718	1	0	132	119	2	27543	TRIM21,AGTR1A
GO:BP	heterocycle catabolic process	GO:0046700	1	0	439	119	2	27543	TET2,HNRNPR
GO:BP	lymphocyte activation	GO:0046649	1	0	872	119	2	27543	SMAD3,PREX1
GO:BP	negative regulation of insulin receptor signaling pathway	GO:0046627	1	0	35	119	1	27543	NUCB2
GO:BP	regulation of insulin receptor signaling pathway	GO:0046626	1	0	71	119	1	27543	NUCB2
GO:BP	regulation of centrosome cycle	GO:0046605	1	0	54	119	2	27543	PDCD6IP,PLK2
GO:BP	regulation of centriole replication	GO:0046599	1	0	23	119	1	27543	PLK2
GO:BP	positive regulation of viral entry into host cell	GO:0046598	1	0	12	119	1	27543	TRIM21
GO:BP	regulation of viral entry into host cell	GO:0046596	1	0	50	119	1	27543	TRIM21
GO:BP	heterocycle metabolic process	GO:0046483	1	0	8407	119	23	27543	BARHL2,TFB1M,ZFP326,ARNT2,RRM1,TRIM21,IMP3,PKM,SMAD3,HLF,BPTF,SMAD2,GNAI3,TET2,SYF2,E2F2,ZFP46,HNRNPR,KMT2A,ZC3H12C,TRMT12,ZFAT,DMRTC2
GO:BP	positive regulation of receptor signaling pathway via JAK-STAT	GO:0046427	1	0	67	119	1	27543	AGTR1A
GO:BP	regulation of receptor signaling pathway via JAK-STAT	GO:0046425	1	0	133	119	1	27543	AGTR1A
GO:BP	carboxylic acid biosynthetic process	GO:0046394	1	0	299	119	2	27543	STARD4,PKM
GO:BP	ribose phosphate biosynthetic process	GO:0046390	1	0	185	119	1	27543	PKM
GO:BP	deoxyribose phosphate biosynthetic process	GO:0046385	1	0	17	119	1	27543	RRM1
GO:BP	monosaccharide catabolic process	GO:0046365	1	0	29	119	1	27543	GLB1
GO:BP	positive regulation of fatty acid oxidation	GO:0046321	1	0	20	119	1	27543	NUCB2
GO:BP	regulation of fatty acid oxidation	GO:0046320	1	0	39	119	1	27543	NUCB2
GO:BP	nitric oxide metabolic process	GO:0046209	1	0	89	119	1	27543	SMAD3
GO:BP	phenol-containing compound biosynthetic process	GO:0046189	1	0	52	119	1	27543	AGTR1A
GO:BP	GTP metabolic process	GO:0046039	1	0	30	119	1	27543	GNAI3
GO:BP	ATP metabolic process	GO:0046034	1	0	272	119	1	27543	PKM
GO:BP	regulation of embryonic development	GO:0045995	1	0	81	119	2	27543	TENM4,PHLDB1
GO:BP	positive regulation of glial cell differentiation	GO:0045687	1	0	54	119	1	27543	TENM4
GO:BP	regulation of glial cell differentiation	GO:0045685	1	0	92	119	1	27543	TENM4
GO:BP	negative regulation of osteoblast differentiation	GO:0045668	1	0	62	119	1	27543	SMAD3
GO:BP	cell cycle G1/S phase transition	GO:0044843	1	0	227	119	2	27543	RRM1,PLK2
GO:BP	cell cycle G2/M phase transition	GO:0044839	1	0	154	119	2	27543	RRM1,SYF2
GO:BP	actomyosin contractile ring organization	GO:0044837	1	0	6	119	1	27543	PDCD6IP
GO:BP	mitotic G2/M transition checkpoint	GO:0044818	1	0	51	119	1	27543	SYF2
GO:BP	suppression of viral release by host	GO:0044790	1	0	20	119	1	27543	TRIM21
GO:BP	cilium organization	GO:0044782	1	0	384	119	2	27543	SYNE2,IFT46
GO:BP	mitotic DNA integrity checkpoint signaling	GO:0044774	1	0	81	119	1	27543	SYF2
GO:BP	mitotic DNA damage checkpoint signaling	GO:0044773	1	0	77	119	1	27543	SYF2
GO:BP	mitotic cell cycle phase transition	GO:0044772	1	0	412	119	3	27543	RRM1,PLK2,SYF2
GO:BP	cell cycle phase transition	GO:0044770	1	0	504	119	3	27543	RRM1,PLK2,SYF2
GO:BP	DNA methylation or demethylation	GO:0044728	1	0	88	119	2	27543	TET2,KMT2A
GO:BP	multi-multicellular organism process	GO:0044706	1	0	260	119	1	27543	SMURF2
GO:BP	multi-organism reproductive process	GO:0044703	1	0	245	119	1	27543	SMURF2
GO:BP	tooth eruption	GO:0044691	1	0	7	119	1	27543	ADAMTS5
GO:BP	histone H3-K4 dimethylation	GO:0044648	1	0	7	119	1	27543	KMT2A
GO:BP	biological process involved in interspecies interaction between organisms	GO:0044419	1	0	1886	119	8	27543	TRIM21,LOXL1,SMAD3,IL22RA1,AGTR1A,EXOC2,ADAMTS5,MIR30D
GO:BP	entry into host	GO:0044409	1	0	136	119	3	27543	TRIM21,AGTR1A,EXOC2
GO:BP	biological process involved in symbiotic interaction	GO:0044403	1	0	292	119	3	27543	TRIM21,AGTR1A,EXOC2
GO:BP	small molecule biosynthetic process	GO:0044283	1	0	559	119	2	27543	STARD4,PKM
GO:BP	small molecule catabolic process	GO:0044282	1	0	369	119	1	27543	GLB1
GO:BP	small molecule metabolic process	GO:0044281	1	0	1778	119	8	27543	STARD4,ME3,RRM1,PKM,GLB1,GNAI3,TET2,NUCB2
GO:BP	sulfur compound biosynthetic process	GO:0044272	1	0	109	119	1	27543	CHSY3
GO:BP	cellular nitrogen compound biosynthetic process	GO:0044271	1	0	4774	119	19	27543	BARHL2,TFB1M,ZFP326,ARNT2,RRM1,TRIM21,PKM,SMAD3,HLF,BPTF,SMAD2,TET2,E2F2,ZFP46,HNRNPR,KMT2A,AGTR1A,ZFAT,DMRTC2
GO:BP	cellular nitrogen compound catabolic process	GO:0044270	1	0	440	119	2	27543	TET2,HNRNPR
GO:BP	cellular protein metabolic process	GO:0044267	1	0	4958	119	25	27543	BARHL2,PKN2,ARRDC4,TRIM21,PEAK1,LOXL1,ARIH1,PKM,SMAD3,PDCD6IP,SMURF2,PLK2,OXR1,STK32A,SMAD2,STKLD1,TET2,HNRNPR,LNX1,FZD10,KMT2A,SIK3,AGTR1A,CSNK1G3,DMRTC2
GO:BP	cellular macromolecule catabolic process	GO:0044265	1	0	1141	119	6	27543	ARIH1,PDCD6IP,SMURF2,PLK2,HNRNPR,LNX1
GO:BP	cellular carbohydrate metabolic process	GO:0044262	1	0	303	119	1	27543	GLB1
GO:BP	G0 to G1 transition	GO:0045023	1	0	15	119	1	27543	RRM1
GO:BP	regulation of viral genome replication	GO:0045069	1	0	96	119	1	27543	PKN2
GO:BP	positive regulation of viral genome replication	GO:0045070	1	0	34	119	1	27543	PKN2
GO:BP	innate immune response	GO:0045087	1	0	916	119	1	27543	TRIM21
GO:BP	regulation of osteoblast differentiation	GO:0045667	1	0	149	119	1	27543	SMAD3
GO:BP	positive regulation of neuron differentiation	GO:0045666	1	0	116	119	1	27543	FEZ1
GO:BP	regulation of neuron differentiation	GO:0045664	1	0	235	119	1	27543	FEZ1
GO:BP	positive regulation of myoblast differentiation	GO:0045663	1	0	32	119	1	27543	BOC
GO:BP	regulation of myoblast differentiation	GO:0045661	1	0	66	119	1	27543	BOC
GO:BP	positive regulation of endothelial cell differentiation	GO:0045603	1	0	13	119	1	27543	TMEM100
GO:BP	regulation of endothelial cell differentiation	GO:0045601	1	0	43	119	1	27543	TMEM100
GO:BP	negative regulation of fat cell differentiation	GO:0045599	1	0	57	119	2	27543	SMAD3,NUCB2
GO:BP	regulation of fat cell differentiation	GO:0045598	1	0	143	119	2	27543	SMAD3,NUCB2
GO:BP	positive regulation of cell differentiation	GO:0045597	1	0	948	119	8	27543	TIAM2,TENM4,FEZ1,SMAD3,TMEM100,BOC,SMAD2,PREX1
GO:BP	negative regulation of cell differentiation	GO:0045596	1	0	788	119	2	27543	SMAD3,NUCB2
GO:BP	regulation of cell differentiation	GO:0045595	1	0	1718	119	10	27543	TIAM2,TENM4,FEZ1,SMAD3,TMEM100,BOC,SMAD2,PREX1,NUCB2,PHLDB1
GO:BP	endothelial cell differentiation	GO:0045446	1	0	117	119	1	27543	TMEM100
GO:BP	cellular protein catabolic process	GO:0044257	1	0	828	119	5	27543	ARIH1,PDCD6IP,SMURF2,PLK2,LNX1
GO:BP	myoblast differentiation	GO:0045445	1	0	94	119	1	27543	BOC
GO:BP	positive regulation of nitric oxide biosynthetic process	GO:0045429	1	0	48	119	1	27543	SMAD3
GO:BP	regulation of nitric oxide biosynthetic process	GO:0045428	1	0	71	119	1	27543	SMAD3
GO:BP	phospholipid translocation	GO:0045332	1	0	53	119	1	27543	XKR7
GO:BP	leukocyte activation	GO:0045321	1	0	1046	119	2	27543	SMAD3,PREX1
GO:BP	external encapsulating structure organization	GO:0045229	1	0	297	119	3	27543	SMAD3,PHLDB1,ADAMTS5
GO:BP	cell-cell junction organization	GO:0045216	1	0	215	119	4	27543	PKN2,SMAD3,PDCD6IP,CDH6
GO:BP	maintenance of epithelial cell apical/basal polarity	GO:0045199	1	0	10	119	1	27543	PDCD6IP
GO:BP	establishment or maintenance of epithelial cell apical/basal polarity	GO:0045197	1	0	48	119	2	27543	DLG2,PDCD6IP
GO:BP	establishment of protein localization	GO:0045184	1	0	1671	119	14	27543	ARRDC4,ZFAND6,DLG2,SCAMP2,PDCD6IP,CACNG5,SMAD2,VPS45,SCFD2,ARCN1,IFT46,AGTR1A,EXOC2,FAM91A1
GO:BP	cell fate commitment	GO:0045165	1	0	274	119	3	27543	BARHL2,TENM4,SMAD2
GO:BP	clustering of voltage-gated potassium channels	GO:0045163	1	0	5	119	1	27543	DLG2
GO:BP	neuronal ion channel clustering	GO:0045161	1	0	12	119	1	27543	DLG2
GO:BP	regulation of innate immune response	GO:0045088	1	0	232	119	1	27543	TRIM21
GO:BP	fat cell differentiation	GO:0045444	1	0	253	119	2	27543	SMAD3,NUCB2
GO:BP	positive regulation of embryonic development	GO:0040019	1	0	22	119	1	27543	TENM4
GO:BP	positive regulation of locomotion	GO:0040017	1	0	606	119	4	27543	SMAD3,SMURF2,PLK2,SYNE2
GO:BP	negative regulation of locomotion	GO:0040013	1	0	325	119	1	27543	DPYSL3
GO:BP	regulation of intracellular transport	GO:0032386	1	0	336	119	1	27543	FEZ1
GO:BP	positive regulation of lipid transport	GO:0032370	1	0	95	119	1	27543	NUCB2
GO:BP	regulation of lipid transport	GO:0032368	1	0	151	119	2	27543	NUCB2,AGTR1A
GO:BP	intracellular cholesterol transport	GO:0032367	1	0	27	119	1	27543	STARD4
GO:BP	intracellular sterol transport	GO:0032366	1	0	30	119	1	27543	STARD4
GO:BP	intracellular lipid transport	GO:0032365	1	0	40	119	1	27543	STARD4
GO:BP	positive regulation of chondrocyte differentiation	GO:0032332	1	0	21	119	1	27543	SMAD3
GO:BP	regulation of chondrocyte differentiation	GO:0032330	1	0	54	119	1	27543	SMAD3
GO:BP	peripheral nervous system axon ensheathment	GO:0032292	1	0	30	119	1	27543	NCMAP
GO:BP	axon ensheathment in central nervous system	GO:0032291	1	0	25	119	1	27543	TENM4
GO:BP	peripheral nervous system myelin formation	GO:0032290	1	0	3	119	1	27543	NCMAP
GO:BP	central nervous system myelin formation	GO:0032289	1	0	6	119	1	27543	TENM4
GO:BP	myelin assembly	GO:0032288	1	0	23	119	2	27543	TENM4,NCMAP
GO:BP	positive regulation of protein polymerization	GO:0032273	1	0	93	119	1	27543	PDE4DIP
GO:BP	regulation of protein polymerization	GO:0032271	1	0	210	119	3	27543	ARHGAP28,PDE4DIP,ARHGAP18
GO:BP	positive regulation of cellular protein metabolic process	GO:0032270	1	0	1437	119	10	27543	BARHL2,ARRDC4,ARIH1,PKM,SMAD3,PLK2,FZD10,KMT2A,AGTR1A,DMRTC2
GO:BP	negative regulation of cellular protein metabolic process	GO:0032269	1	0	1057	119	3	27543	TRIM21,OXR1,HNRNPR
GO:BP	regulation of cellular protein metabolic process	GO:0032268	1	0	2456	119	13	27543	BARHL2,ARRDC4,TRIM21,ARIH1,PKM,SMAD3,PLK2,OXR1,HNRNPR,FZD10,KMT2A,AGTR1A,DMRTC2
GO:BP	methylation	GO:0032259	1	0	377	119	5	27543	TFB1M,TET2,KMT2A,TRMT12,DMRTC2
GO:BP	activation of store-operated calcium channel activity	GO:0032237	1	0	6	119	1	27543	STIM1
GO:BP	positive regulation of actin filament bundle assembly	GO:0032233	1	0	68	119	1	27543	SMAD3
GO:BP	negative regulation of actin filament bundle assembly	GO:0032232	1	0	38	119	1	27543	ARHGAP28
GO:BP	regulation of actin filament bundle assembly	GO:0032231	1	0	113	119	2	27543	SMAD3,ARHGAP28
GO:BP	activation of protein kinase activity	GO:0032147	1	0	135	119	1	27543	AGTR1A
GO:BP	negative regulation of response to nutrient levels	GO:0032108	1	0	15	119	1	27543	NUCB2
GO:BP	regulation of response to nutrient levels	GO:0032107	1	0	31	119	1	27543	NUCB2
GO:BP	negative regulation of response to extracellular stimulus	GO:0032105	1	0	15	119	1	27543	NUCB2
GO:BP	positive regulation of intracellular transport	GO:0032388	1	0	190	119	1	27543	FEZ1
GO:BP	regulation of response to extracellular stimulus	GO:0032104	1	0	31	119	1	27543	NUCB2
GO:BP	regulation of transporter activity	GO:0032409	1	0	290	119	3	27543	STIM1,CACNG5,KMT2A
GO:BP	regulation of ion transmembrane transporter activity	GO:0032412	1	0	267	119	2	27543	STIM1,CACNG5
GO:BP	cellular response to hormone stimulus	GO:0032870	1	0	633	119	3	27543	PKM,NUCB2,AGTR1A
GO:BP	cellular response to insulin stimulus	GO:0032869	1	0	223	119	2	27543	PKM,NUCB2
GO:BP	response to insulin	GO:0032868	1	0	278	119	2	27543	PKM,NUCB2
GO:BP	monocarboxylic acid metabolic process	GO:0032787	1	0	649	119	4	27543	STARD4,ME3,PKM,NUCB2
GO:BP	regulation of DNA-templated transcription, elongation	GO:0032784	1	0	51	119	1	27543	ZFP326
GO:BP	RNA biosynthetic process	GO:0032774	1	0	3614	119	15	27543	BARHL2,TFB1M,ZFP326,ARNT2,TRIM21,SMAD3,HLF,BPTF,SMAD2,TET2,E2F2,ZFP46,KMT2A,ZFAT,DMRTC2
GO:BP	positive regulation of interleukin-1 production	GO:0032732	1	0	75	119	1	27543	SMAD3
GO:BP	positive regulation of interleukin-1 beta production	GO:0032731	1	0	63	119	1	27543	SMAD3
GO:BP	regulation of interleukin-1 production	GO:0032652	1	0	120	119	1	27543	SMAD3
GO:BP	regulation of interleukin-1 beta production	GO:0032651	1	0	100	119	1	27543	SMAD3
GO:BP	interleukin-1 production	GO:0032612	1	0	120	119	1	27543	SMAD3
GO:BP	interleukin-1 beta production	GO:0032611	1	0	100	119	1	27543	SMAD3
GO:BP	regulation of cellular component size	GO:0032535	1	0	387	119	3	27543	BARHL2,ARHGAP28,ARHGAP18
GO:BP	cytokinetic process	GO:0032506	1	0	37	119	1	27543	PDCD6IP
GO:BP	multicellular organism reproduction	GO:0032504	1	0	1130	119	1	27543	DMRTC2
GO:BP	developmental process	GO:0032502	1	0	6788	119	42	27543	BARHL2,TIAM2,DOK5,ARNT2,VMN2R74,TMEM135,DLG2,TENM4,STIM1,FEZ1,PEAK1,LOXL1,PKM,SMAD3,TMEM100,HLF,SMURF2,BPTF,PLK2,BOC,DPYSL3,SMAD2,SYNE2,XKR7,PREX1,FSTL5,TET2,SYF2,NCMAP,E2F2,GRID2,NUCB2,PHLDB1,ARCN1,KMT2A,DSCAML1,ARHGAP18,AGTR1A,CDH6,ADAMTS5,ZFAT,DMRTC2
GO:BP	multicellular organismal process	GO:0032501	1	0	8766	119	46	27543	BARHL2,TIAM2,DOK5,PKN2,ARNT2,VMN2R74,OLFR310,TMEM135,DLG2,TENM4,STIM1,OLFR547,OLFR566,OLFR575,OLFR605,OLFR624,FEZ1,LOXL1,PKM,SMAD3,TMEM100,SMURF2,BPTF,CACNG5,PLK2,OXR1,BOC,DPYSL3,SMAD2,SYNE2,PREX1,TET2,SYF2,NCMAP,MYOM3,E2F2,GRID2,PHLDB1,ARCN1,KMT2A,DSCAML1,AGTR1A,ADAMTS5,ZFAT,MIR30D,DMRTC2
GO:BP	response to lipopolysaccharide	GO:0032496	1	0	441	119	2	27543	LOXL1,MIR30D
GO:BP	Rap protein signal transduction	GO:0032486	1	0	13	119	1	27543	PLK2
GO:BP	positive regulation of cytokinesis	GO:0032467	1	0	47	119	1	27543	PKN2
GO:BP	regulation of cytokinesis	GO:0032465	1	0	97	119	2	27543	PKN2,PLK2
GO:BP	protein modification by small protein conjugation	GO:0032446	1	0	903	119	5	27543	ARRDC4,TRIM21,ARIH1,SMURF2,LNX1
GO:BP	positive regulation of proteasomal ubiquitin-dependent protein catabolic process	GO:0032436	1	0	88	119	2	27543	ARIH1,PLK2
GO:BP	regulation of proteasomal ubiquitin-dependent protein catabolic process	GO:0032434	1	0	136	119	2	27543	ARIH1,PLK2
GO:BP	positive regulation of phospholipase A2 activity	GO:0032430	1	0	9	119	1	27543	AGTR1A
GO:BP	regulation of phospholipase A2 activity	GO:0032429	1	0	12	119	1	27543	AGTR1A
GO:BP	positive regulation of ion transmembrane transporter activity	GO:0032414	1	0	122	119	1	27543	STIM1
GO:BP	positive regulation of transporter activity	GO:0032411	1	0	130	119	2	27543	STIM1,KMT2A
GO:BP	positive regulation of response to external stimulus	GO:0032103	1	0	447	119	1	27543	SMAD3
GO:BP	negative regulation of response to external stimulus	GO:0032102	1	0	385	119	4	27543	TRIM21,SMAD3,GRID2,NUCB2
GO:BP	regulation of response to external stimulus	GO:0032101	1	0	946	119	4	27543	TRIM21,SMAD3,GRID2,NUCB2
GO:BP	positive regulation of cellular catabolic process	GO:0031331	1	0	446	119	5	27543	TRIM21,ARIH1,PLK2,GNAI3,HNRNPR
GO:BP	negative regulation of cellular catabolic process	GO:0031330	1	0	246	119	1	27543	FEZ1
GO:BP	regulation of cellular catabolic process	GO:0031329	1	0	784	119	6	27543	TRIM21,FEZ1,ARIH1,PLK2,GNAI3,HNRNPR
GO:BP	positive regulation of cellular biosynthetic process	GO:0031328	1	0	2030	119	13	27543	STARD4,BARHL2,ARNT2,TRIM21,PKM,SMAD3,HLF,BPTF,SMAD2,TET2,E2F2,KMT2A,ZFAT
GO:BP	negative regulation of cellular biosynthetic process	GO:0031327	1	0	1677	119	5	27543	SMAD3,BPTF,SMAD2,ZFP46,HNRNPR
GO:BP	regulation of cellular biosynthetic process	GO:0031326	1	0	4136	119	17	27543	STARD4,BARHL2,ZFP326,ARNT2,TRIM21,PKM,SMAD3,HLF,BPTF,SMAD2,TET2,E2F2,ZFP46,HNRNPR,KMT2A,ZFAT,DMRTC2
GO:BP	positive regulation of cellular metabolic process	GO:0031325	1	0	3386	119	22	27543	STARD4,BARHL2,ARRDC4,ARNT2,TRIM21,ARIH1,PKM,SMAD3,HLF,BPTF,PLK2,SMAD2,GNAI3,TET2,E2F2,HNRNPR,FZD10,NUCB2,KMT2A,AGTR1A,ZFAT,DMRTC2
GO:BP	negative regulation of cellular metabolic process	GO:0031324	1	0	2670	119	10	27543	TRIM21,FEZ1,SMAD3,BPTF,PLK2,OXR1,SMAD2,ZFP46,HNRNPR,KMT2A
GO:BP	regulation of cellular metabolic process	GO:0031323	1	0	6103	119	26	27543	STARD4,BARHL2,ZFP326,ARRDC4,ARNT2,TRIM21,FEZ1,ARIH1,PKM,SMAD3,HLF,BPTF,PLK2,OXR1,SMAD2,GNAI3,TET2,E2F2,ZFP46,HNRNPR,FZD10,NUCB2,KMT2A,AGTR1A,ZFAT,DMRTC2
GO:BP	positive regulation of cyclase activity	GO:0031281	1	0	42	119	1	27543	STIM1
GO:BP	regulation of cyclase activity	GO:0031279	1	0	67	119	1	27543	STIM1
GO:BP	biomineral tissue development	GO:0031214	1	0	163	119	2	27543	STIM1,SMAD3
GO:BP	neuron projection development	GO:0031175	1	0	1085	119	8	27543	BARHL2,TIAM2,FEZ1,PLK2,BOC,DPYSL3,GRID2,DSCAML1
GO:BP	rRNA methylation	GO:0031167	1	0	20	119	1	27543	TFB1M
GO:BP	cytoplasmic microtubule organization	GO:0031122	1	0	58	119	1	27543	PDE4DIP
GO:BP	positive regulation of microtubule polymerization	GO:0031116	1	0	33	119	1	27543	PDE4DIP
GO:BP	regulation of microtubule polymerization	GO:0031113	1	0	56	119	1	27543	PDE4DIP
GO:BP	positive regulation of microtubule polymerization or depolymerization	GO:0031112	1	0	38	119	1	27543	PDE4DIP
GO:BP	regulation of microtubule polymerization or depolymerization	GO:0031110	1	0	91	119	1	27543	PDE4DIP
GO:BP	microtubule polymerization or depolymerization	GO:0031109	1	0	124	119	1	27543	PDE4DIP
GO:BP	animal organ regeneration	GO:0031100	1	0	83	119	1	27543	PKM
GO:BP	regeneration	GO:0031099	1	0	223	119	1	27543	PKM
GO:BP	stress-activated protein kinase signaling cascade	GO:0031098	1	0	245	119	1	27543	SMAD3
GO:BP	positive regulation of histone methylation	GO:0031062	1	0	56	119	2	27543	KMT2A,DMRTC2
GO:BP	regulation of histone methylation	GO:0031060	1	0	90	119	2	27543	KMT2A,DMRTC2
GO:BP	positive regulation of histone modification	GO:0031058	1	0	111	119	2	27543	KMT2A,DMRTC2
GO:BP	regulation of histone modification	GO:0031056	1	0	190	119	2	27543	KMT2A,DMRTC2
GO:BP	positive regulation of protein-containing complex assembly	GO:0031334	1	0	202	119	1	27543	PDE4DIP
GO:BP	regulation of cell projection organization	GO:0031344	1	0	732	119	6	27543	TIAM2,FEZ1,DPYSL3,SYNE2,GRID2,IFT46
GO:BP	negative regulation of cell projection organization	GO:0031345	1	0	207	119	1	27543	DPYSL3
GO:BP	positive regulation of cell projection organization	GO:0031346	1	0	423	119	3	27543	TIAM2,FEZ1,DPYSL3
GO:BP	negative regulation of appetite	GO:0032099	1	0	14	119	1	27543	NUCB2
GO:BP	regulation of appetite	GO:0032098	1	0	25	119	1	27543	NUCB2
GO:BP	negative regulation of response to food	GO:0032096	1	0	15	119	1	27543	NUCB2
GO:BP	regulation of response to food	GO:0032095	1	0	22	119	1	27543	NUCB2
GO:BP	response to food	GO:0032094	1	0	46	119	2	27543	TMEM135,NUCB2
GO:BP	positive regulation of protein binding	GO:0032092	1	0	99	119	2	27543	TRIM21,PLK2
GO:BP	negative regulation of NF-kappaB transcription factor activity	GO:0032088	1	0	80	119	1	27543	TRIM21
GO:BP	bleb assembly	GO:0032060	1	0	12	119	1	27543	EMP1
GO:BP	mitochondrial DNA metabolic process	GO:0032042	1	0	25	119	1	27543	RRM1
GO:BP	response to corticosteroid	GO:0031960	1	0	195	119	2	27543	GLB1,AGTR1A
GO:BP	response to nutrient levels	GO:0031667	1	0	534	119	2	27543	TMEM135,NUCB2
GO:BP	protein destabilization	GO:0031648	1	0	55	119	1	27543	TRIM21
GO:BP	regulation of protein stability	GO:0031647	1	0	308	119	3	27543	TRIM21,SMAD3,IFT46
GO:BP	regulation of localization	GO:0032879	1	0	2881	119	16	27543	PKN2,TMEM135,STIM1,FEZ1,SMAD3,PDCD6IP,SMURF2,CACNG5,PLK2,DPYSL3,SYNE2,NUCB2,KMT2A,ARHGAP18,AGTR1A,EXOC2
GO:BP	positive regulation of nervous system process	GO:0031646	1	0	54	119	2	27543	TENM4,NCMAP
GO:BP	positive regulation of myelination	GO:0031643	1	0	22	119	2	27543	TENM4,NCMAP
GO:BP	regulation of myelination	GO:0031641	1	0	59	119	2	27543	TENM4,NCMAP
GO:BP	receptor internalization	GO:0031623	1	0	128	119	1	27543	CACNG5
GO:BP	cell-substrate adhesion	GO:0031589	1	0	365	119	3	27543	PEAK1,SMAD3,PREX1
GO:BP	DNA integrity checkpoint signaling	GO:0031570	1	0	116	119	1	27543	SYF2
GO:BP	protein-containing complex localization	GO:0031503	1	0	193	119	3	27543	DLG2,CACNG5,IFT46
GO:BP	positive regulation of protein modification process	GO:0031401	1	0	1043	119	5	27543	ARRDC4,FZD10,KMT2A,AGTR1A,DMRTC2
GO:BP	negative regulation of protein modification process	GO:0031400	1	0	526	119	2	27543	TRIM21,OXR1
GO:BP	regulation of protein modification process	GO:0031399	1	0	1574	119	7	27543	ARRDC4,TRIM21,OXR1,FZD10,KMT2A,AGTR1A,DMRTC2
GO:BP	positive regulation of protein ubiquitination	GO:0031398	1	0	127	119	1	27543	ARRDC4
GO:BP	regulation of protein ubiquitination	GO:0031396	1	0	222	119	1	27543	ARRDC4
GO:BP	negative regulation of defense response	GO:0031348	1	0	232	119	2	27543	TRIM21,SMAD3
GO:BP	regulation of defense response	GO:0031347	1	0	618	119	2	27543	TRIM21,SMAD3
GO:BP	regulation of nervous system process	GO:0031644	1	0	186	119	4	27543	TENM4,TMEM100,CACNG5,NCMAP
GO:BP	regulation of microtubule-based process	GO:0032886	1	0	263	119	5	27543	FEZ1,PDCD6IP,PLK2,PDE4DIP,PHLDB1
GO:BP	negative regulation of viral transcription	GO:0032897	1	0	16	119	1	27543	TRIM21
GO:BP	transforming growth factor beta2 production	GO:0032906	1	0	9	119	1	27543	SMAD3
GO:BP	non-canonical Wnt signaling pathway	GO:0035567	1	0	51	119	1	27543	FZD10
GO:BP	intracellular signal transduction	GO:0035556	1	0	2516	119	17	27543	TIAM2,DOK5,PKN2,ZFAND6,SMAD3,TMEM100,PLK2,ARHGAP28,STK32A,SMAD2,PREX1,SYF2,E2F2,FZD10,NUCB2,ARHGAP18,AGTR1A
GO:BP	oxidative DNA demethylation	GO:0035511	1	0	7	119	1	27543	TET2
GO:BP	DNA dealkylation	GO:0035510	1	0	27	119	1	27543	TET2
GO:BP	protein localization to synapse	GO:0035418	1	0	84	119	1	27543	DLG2
GO:BP	positive regulation of dephosphorylation	GO:0035306	1	0	63	119	1	27543	SMAD3
GO:BP	regulation of dephosphorylation	GO:0035303	1	0	131	119	1	27543	SMAD3
GO:BP	regulation of tube diameter	GO:0035296	1	0	166	119	1	27543	AGTR1A
GO:BP	tube development	GO:0035295	1	0	1157	119	8	27543	STIM1,PKM,SMAD3,TMEM100,PLK2,SMAD2,E2F2,AGTR1A
GO:BP	segmentation	GO:0035282	1	0	102	119	1	27543	SMAD3
GO:BP	endocrine system development	GO:0035270	1	0	148	119	2	27543	SMAD3,SMAD2
GO:BP	organ growth	GO:0035265	1	0	199	119	2	27543	TENM4,SMAD2
GO:BP	synaptic transmission, glutamatergic	GO:0035249	1	0	107	119	2	27543	CACNG5,GRID2
GO:BP	tube morphogenesis	GO:0035239	1	0	909	119	8	27543	STIM1,PKM,SMAD3,TMEM100,PLK2,SMAD2,E2F2,AGTR1A
GO:BP	ionotropic glutamate receptor signaling pathway	GO:0035235	1	0	27	119	1	27543	GRID2
GO:BP	miRNA-mediated gene silencing	GO:0035195	1	0	466	119	1	27543	MIR30D
GO:BP	post-transcriptional gene silencing by RNA	GO:0035194	1	0	475	119	1	27543	MIR30D
GO:BP	embryonic hemopoiesis	GO:0035162	1	0	25	119	1	27543	KMT2A
GO:BP	regulation of tube size	GO:0035150	1	0	167	119	1	27543	AGTR1A
GO:BP	maintenance of apical/basal cell polarity	GO:0035090	1	0	11	119	1	27543	PDCD6IP
GO:BP	establishment or maintenance of apical/basal cell polarity	GO:0035088	1	0	54	119	2	27543	DLG2,PDCD6IP
GO:BP	axoneme assembly	GO:0035082	1	0	94	119	1	27543	IFT46
GO:BP	regulation of histone acetylation	GO:0035065	1	0	63	119	1	27543	KMT2A
GO:BP	cardiocyte differentiation	GO:0035051	1	0	174	119	1	27543	TENM4
[truncated: 6,785 more rows]
